# Supplementary material for: Effect of phenolic glycolipids from Mycobacterium kansasii on proinflammatory cytokine release. A structure–activity relationship study
Source: PubMed Central journal article supplement — Chem Sci. 2015 Mar 26;6(5):3161–72. doi: 10.1039/c4sc04004j (PMC5490424; doi:10.1039/c4sc04004j), 2015-03-26

**Supporting Information for:**  
**Synthetic Glycoimmunochemistry. Effect of Phenolic Glycolipids From**  
***Mycobacterium kansasii* on Proinflammatory Cytokine Release**

Hassan R. H. Elsaidi and Todd L. Lowary

**Table of Contents**

| <b>Contents</b>                                                                            | <b>Page</b> |
|--------------------------------------------------------------------------------------------|-------------|
| <b><i>Scheme S1</i></b> : Retrosynthetic analysis of analogs <b>8</b> and <b>9</b>         | <b>S6</b>   |
| <b><i>Scheme S2</i></b> : Retrosynthetic analysis of analogs <b>18–24</b>                  | <b>S6</b>   |
| <b><i>Scheme S3</i></b> : Retrosynthetic analysis of glycolipid <b>34</b>                  | <b>S7</b>   |
| <b><i>Scheme S4</i></b> : Synthesis of building blocks <b>S1</b> and <b>S2</b>             | <b>S7</b>   |
| <b><i>Scheme S5</i></b> : Synthesis of building blocks <b>S3</b> , <b>S4</b> and <b>25</b> | <b>S8</b>   |
| <b><i>Scheme S6</i></b> : Synthesis of trisaccharide <b>8</b>                              | <b>S9</b>   |
| <b><i>Scheme S7</i></b> : Synthesis of trisaccharide <b>9</b>                              | <b>S9</b>   |
| <b><i>Scheme S8</i></b> : Synthesis of trisaccharide <b>10</b> and <b>11</b>               | <b>S10</b>  |
| <b><i>Scheme S9</i></b> : Synthesis of building block <b>28</b>                            | <b>S10</b>  |
| <b><i>Scheme S10</i></b> : Synthesis of building block <b>S5</b>                           | <b>S11</b>  |
| <b><i>Scheme S11</i></b> : Synthesis of building block <b>S6</b>                           | <b>S11</b>  |
| <b><i>Scheme S12</i></b> : Synthesis of tetrasaccharides <b>18–21</b>                      | <b>S12</b>  |
| <b><i>Scheme S13</i></b> : Synthesis of tetrasaccharides <b>22–24</b>                      | <b>S12</b>  |
| <b><i>Scheme S14</i></b> : Synthesis of building block <b>35</b>                           | <b>S13</b>  |
| <b><i>Scheme S15</i></b> : Synthesis of building blocks <b>S7</b> and <b>S8</b>            | <b>S13</b>  |
| <b><i>Scheme S16</i></b> : Synthesis of building block <b>S9</b>                           | <b>S13</b>  |
| <b><i>Scheme S17</i></b> : Synthesis of glycolipid <b>34</b>                               | <b>S14</b>  |
| <b>Experimental</b>                                                                        | <b>S15</b>  |

|                                                                                                                 |            |
|-----------------------------------------------------------------------------------------------------------------|------------|
| <b>Immunological Evaluation</b>                                                                                 | <b>S73</b> |
| Immunoinhibition assay of compounds <b>1–17</b><br>(Pam3CSK4 [TLR2 agonist] as stimulant), Figures S1–S12       | <b>S73</b> |
| Immunoinhibition assay of compounds <b>1–17</b><br>(Ultra pure LPS [TLR4 agonist] as stimulant), Figures S13–24 | <b>S77</b> |
| Glycolipid <b>34</b> – Pam3CSK4 as stimulant, Figures S25–S28                                                   | <b>S81</b> |
| Glycolipid <b>34</b> – Ultrapure LPS as stimulant, Figures S29–S33                                              | <b>S83</b> |
| <b>NMR Spectra of New Compounds</b>                                                                             | <b>S90</b> |

## List of Abbreviations

| <b>Abbreviation</b>          | <b>Meaning</b>                        |
|------------------------------|---------------------------------------|
| [ $\alpha$ ]                 | specific rotation                     |
| $\mu\text{M}$                | micromolar                            |
| Ac                           | acetyl                                |
| AcOH                         | acetic acid                           |
| All                          | allyl                                 |
| AllBr                        | allyl bromide                         |
| appt                         | apparent triplet (NMR spectra)        |
| Ac <sub>2</sub> O            | acetic anhydride                      |
| aq.                          | aqueous                               |
| Bn                           | benzyl                                |
| BnBr                         | benzyl bromide                        |
| br                           | broad                                 |
| Bu                           | butyl                                 |
| Bz                           | benzoyl                               |
| BzCl                         | benzoyl chloride                      |
| <i>n</i> -Bu <sub>4</sub> NI | tetra- <i>n</i> -butylammonium iodide |

|                   |                                       |
|-------------------|---------------------------------------|
| calcd             | calculated                            |
| COSY              | correlation spectroscopy              |
| °C                | degree Celsius                        |
| CSA               | (±)-camphor-10-sulfonic acid          |
| DBU               | 1,8-diazabicyclo[5.4.0]undec-7-ene    |
| DCC               | <i>N,N'</i> -dicyclohexylcarbodiimide |
| d                 | doublet (NMR spectra)                 |
| dd                | doublet of doublet (NMR spectra)      |
| DMAP              | 4-dimethylaminopyridine               |
| DMF               | <i>N,N'</i> -dimethylformamide        |
| DMSO              | dimethylsulfoxide                     |
| DMP               | 2,3-dimethoxypropane                  |
| equiv.            | equivalent                            |
| Et                | ethyl                                 |
| Et <sub>3</sub> N | triethylamine                         |
| h                 | hour(s)                               |
| HOAc              | acetic acid                           |
| Hz                | hertz                                 |
| <i>J</i>          | coupling constant                     |
| LA                | levulinic acid                        |
| m                 | multiplet (NMR spectra)               |
| M                 | molar                                 |
| Me                | methyl                                |
| mg                | milligram(s)                          |
| MHz               | megahertz                             |
| min               | minute(s)                             |
| mL                | millilitre(s)                         |

|                |                                               |
|----------------|-----------------------------------------------|
| mM             | millimole(s)                                  |
| Milli-Q        | (deionized) distilled water                   |
| NIS            | <i>N</i> -iodosuccinimide                     |
| NTM            | non-tuberculosis mycobacteria                 |
| NMR            | nuclear magnetic resonance                    |
| Ph             | phenyl                                        |
| PMA            | phorbol 12-myristate 13-acetate               |
| ppm            | parts per million (NMR spectra)               |
| <i>p</i> -TsOH | <i>p</i> -toluenesulfonic acid                |
| Py             | pyridine                                      |
| PMPOH          | <i>p</i> -methoxyphenol                       |
| <i>p</i> HBA   | <i>p</i> -hydroxybenzoic acid                 |
| <i>p</i> -MBCl | <i>p</i> -methoxybenzyl chloride              |
| PGL(s)         | phenolic glycolipid(s)                        |
| q              | quartet (NMR spectra)                         |
| $R_f$          | retention factor                              |
| PIMs           | phosphatidyl- <i>myo</i> -inositol mannosides |
| PDIMs          | phthiocerol dimycocerosates                   |
| PMP            | <i>p</i> -methoxyphenyl                       |
| rt             | room temperature                              |
| s              | singlet (NMR spectra)                         |
| satd.          | saturated                                     |
| TB             | tuberculosis                                  |
| TMSOTf         | trimethylsilyltrifluoromethanesulfonate       |
| Tol            | tolyl                                         |
| t              | triplet (in NMR)                              |
| TBAF           | tetra- <i>n</i> -butylammonium fluoride       |

|                             |                                                    |
|-----------------------------|----------------------------------------------------|
| TEA                         | triethylamine                                      |
| $(\text{CH}_3)_3\text{SiH}$ | trimethylsilane                                    |
| TFA                         | trifluoroacetic acid                               |
| OTf                         | trifluoromethanesulfonyl                           |
| THF                         | tetrahydrofuran                                    |
| TLC                         | thin layer chromatography                          |
| TMS                         | trimethylsilyl                                     |
| Ts                          | tosyl, <i>p</i> -toluenesulfonyl                   |
| TsCl                        | tosyl chloride, <i>p</i> -toluenesulfonyl chloride |
| TBDPS                       | <i>tert</i> -butyldiphenylsilyl                    |
| TBDPSCI                     | <i>tert</i> -butyldiphenylsilyl chloride           |
| TolSH                       | <i>p</i> -toluenethiol                             |
| TEOA                        | triethyl orthoacetate                              |

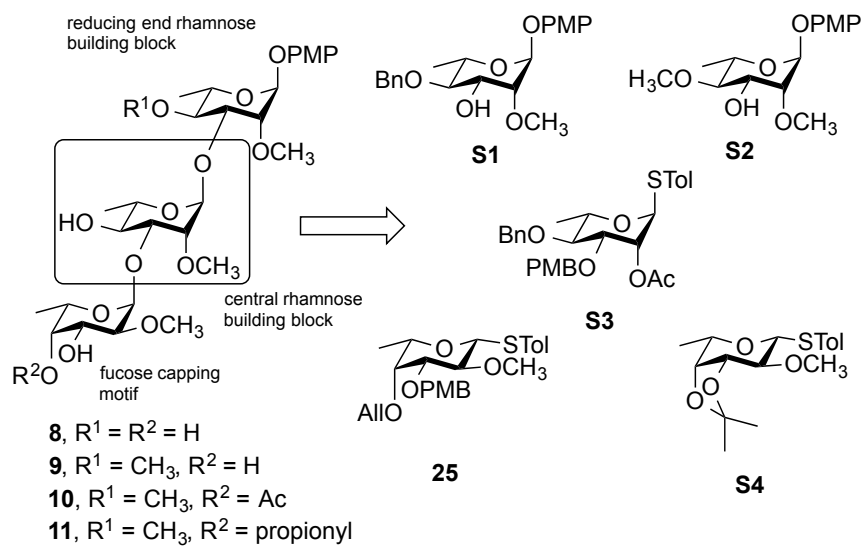

**Scheme S1.** Retrosynthetic analysis of analogs **8** and **9**.

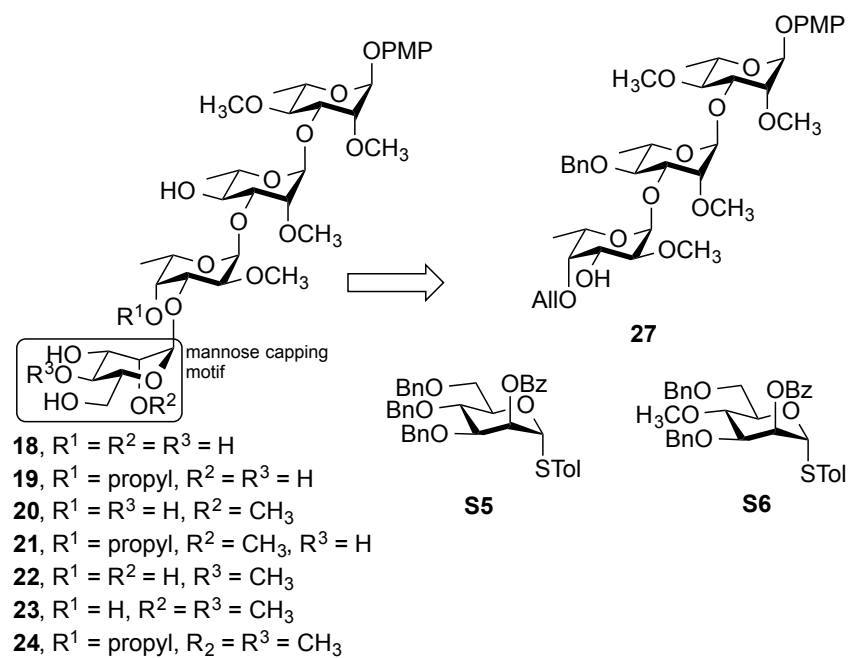

**Scheme S2.** Retrosynthetic analysis of analogs **18–24**.

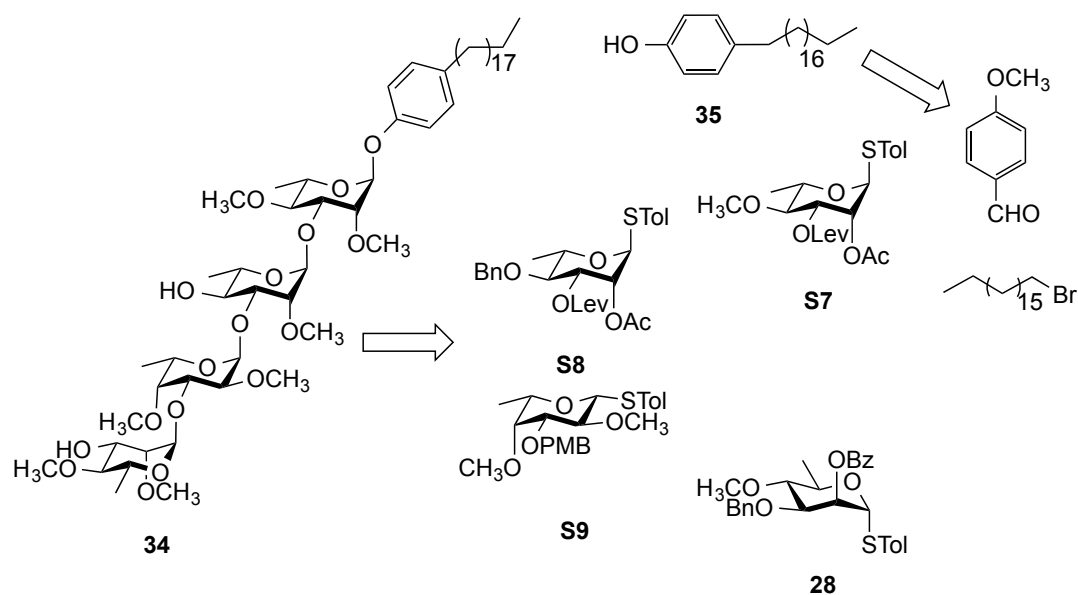

**Scheme S3.** Retrosynthetic analysis of glycolipid **34**

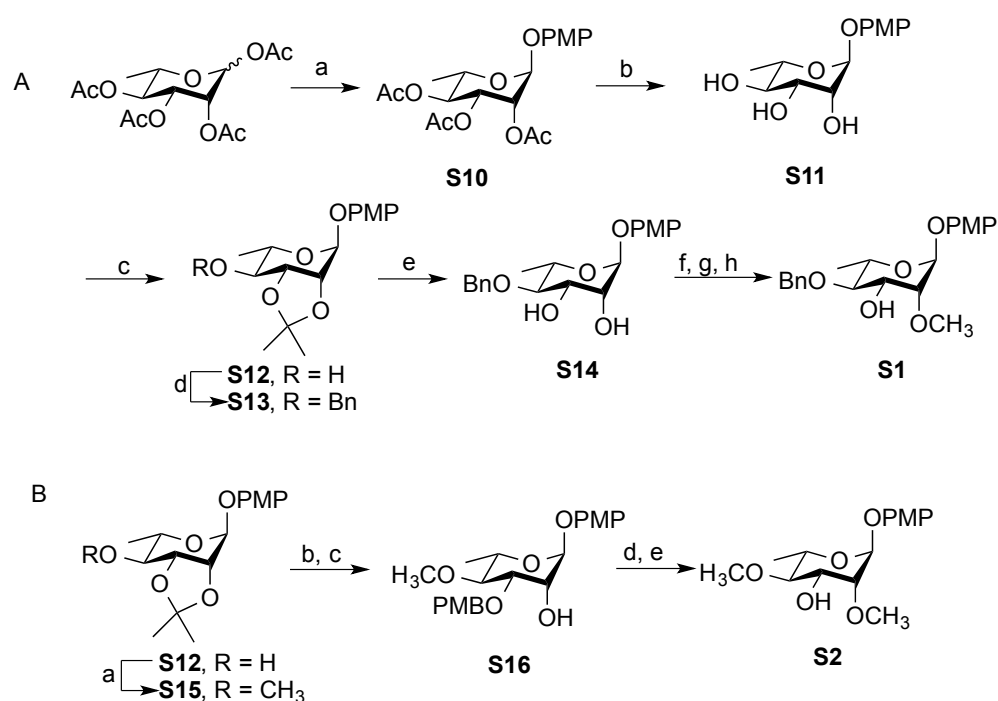

**Scheme S4.** Synthesis of building blocks **S1** and **S2**. Reagents and conditions: A) a)  $\text{BF}_3 \cdot \text{Et}_2\text{O}$ , PMPOH,  $\text{CH}_2\text{Cl}_2$ , overnight, 88%; b)  $\text{NaOCH}_3$ ,  $\text{CH}_3\text{OH}/\text{CH}_2\text{Cl}_2$ , 2 h, 96%; c) DMP, Acetone, *p*-TSA, 40 min, 91%; d)  $\text{BnBr}$ , NaH, DMF, 4 h, 95%; e) *p*-TSA,  $\text{CH}_3\text{OH}$ , 3 h, 82%; f) *n*- $\text{Bu}_2\text{SnO}$ , toluene, 120 °C, 1 h; *p*-MBCl, *n*- $\text{Bu}_4\text{NI}$ , 62 °C, 7 h; g)  $\text{CH}_3\text{I}$ , NaH, DMF, 1 h; h) 5% TFA,  $\text{CH}_2\text{Cl}_2$ , 0 °C, 30 min, 81% over three steps. B) a)  $\text{CH}_3\text{I}$ , NaH, DMF, 1 h, 96%; b) 1. *p*-TSA,  $\text{CH}_3\text{OH}/\text{CH}_2\text{Cl}_2$ , 1 h; c) *n*- $\text{Bu}_2\text{SnO}$ , toluene, 120 °C, 1 h; *p*-MBCl, *n*- $\text{Bu}_4\text{NI}$ , 62 °C, 7 h, 78% over two steps; d)  $\text{CH}_3\text{I}$ , NaH, DMF, 1 h; e) 5% TFA,  $\text{CH}_2\text{Cl}_2$ , 30 min, 81% over two steps.

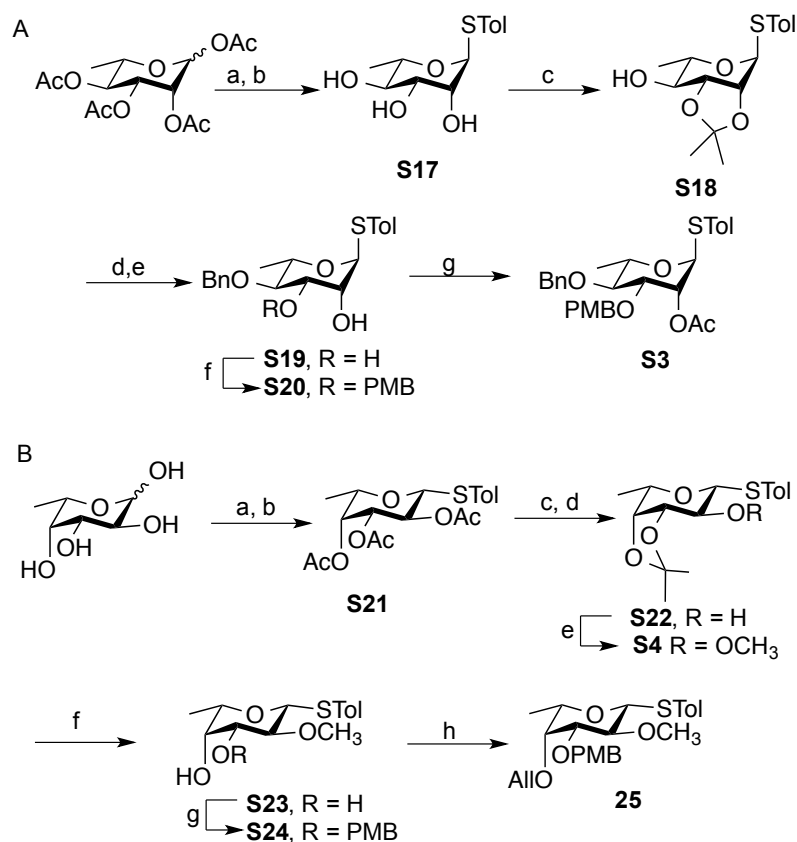

**Scheme S5.** Synthesis of building blocks **S3**, **S4** and **25**. Reagents and conditions: A) a)  $\text{BF}_3 \cdot \text{Et}_2\text{O}$ , TolSH,  $\text{CH}_2\text{Cl}_2$ , 7 h; b)  $\text{NaOCH}_3$ ,  $\text{CH}_3\text{OH}/\text{CH}_2\text{Cl}_2$ , 78% over two steps; c) DMP, acetone, *p*-TSA, 30 min, 96%; d)  $\text{BnBr}$ ,  $\text{NaH}$ , DMF, 1 h; e) *p*-TSA,  $\text{CH}_3\text{OH}/\text{CH}_2\text{Cl}_2$ , 3 h, 81%, over two steps; f) *n*- $\text{Bu}_2\text{SnO}$ , toluene, 120 °C, 1 h; *p*-MBCl, *n*- $\text{Bu}_4\text{NI}$ , 62 °C 6 h, 86%; g)  $\text{Ac}_2\text{O}$ , pyridine, 3 h, 95%. B) a)  $\text{Ac}_2\text{O}$ , pyridine, 7 h; b)  $\text{BF}_3 \cdot \text{Et}_2\text{O}$ , TolSH,  $\text{CH}_2\text{Cl}_2$ , overnight, 91% over two steps; c)  $\text{NaOCH}_3$ ,  $\text{CH}_3\text{OH}/\text{CH}_2\text{Cl}_2$ , 2 h; d) DMP, *p*-TSA, acetone, 45 min, 90% over two steps; e)  $\text{CH}_3\text{I}$ ,  $\text{NaH}$ , DMF, 1 h, 94 %; f) *p*-TSA,  $\text{CH}_3\text{OH}/\text{CH}_2\text{Cl}_2$ , 4 h, 80%; g) *n*- $\text{Bu}_2\text{SnO}$ , toluene, 120 °C, 1h; *p*-MBCl, *n*- $\text{Bu}_4\text{NI}$ , 63 °C, 5h, 83%; h)  $\text{AlI}(\text{Br})_2$ ,  $\text{NaH}$ , DMF, 2 h, 86%.



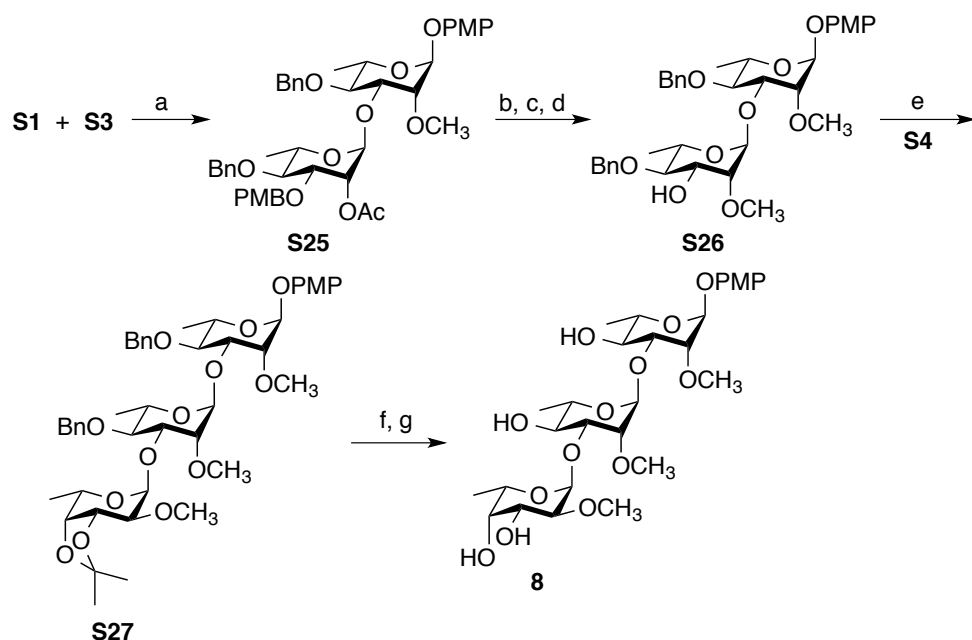

**Scheme S6.** Synthesis of trisaccharide **8**. Reagents and conditions: a) NIS, AgOTf,  $-20\text{ }^{\circ}\text{C}$ , 30 min, 81%; b) NaOCH<sub>3</sub>, CH<sub>3</sub>OH/CH<sub>2</sub>Cl<sub>2</sub>, 1 h; c) CH<sub>3</sub>I, NaH, DMF, 1 h; d) 5% TFA, CH<sub>2</sub>Cl<sub>2</sub>,  $0\text{ }^{\circ}\text{C}$ , 30 min, 87% over three steps; e) NIS, AgOTf, CH<sub>2</sub>Cl<sub>2</sub>,  $-40\text{ }^{\circ}\text{C}$ , 30 min, 80%; f) *p*-TSA, CH<sub>3</sub>OH/CH<sub>2</sub>Cl<sub>2</sub>, 2 h; g) Pd/C, H<sub>2</sub>, CH<sub>3</sub>OH/CH<sub>2</sub>Cl<sub>2</sub>, overnight, 87% over two steps.

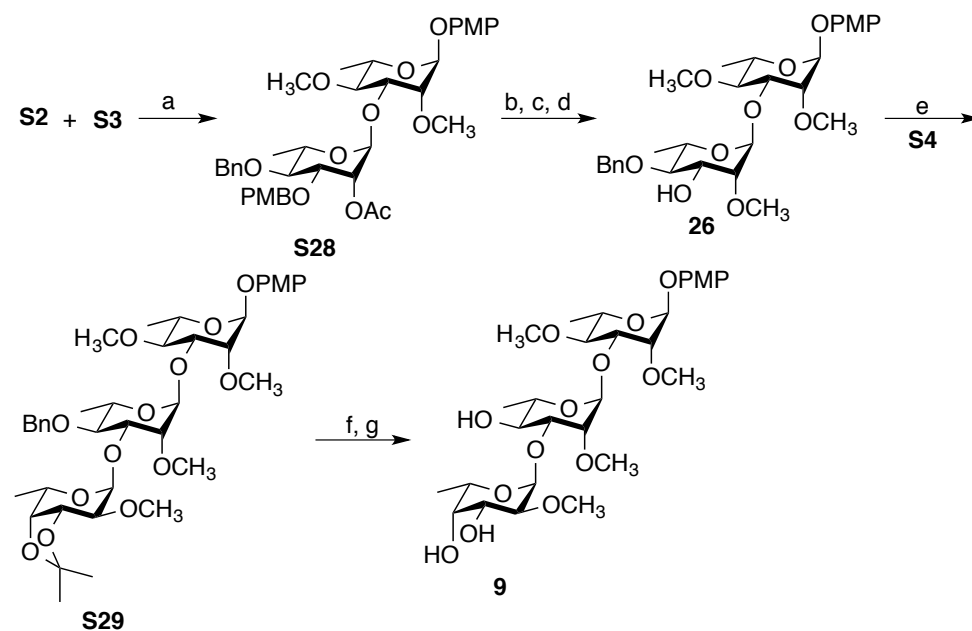

**Scheme S7.** Synthesis of trisaccharide **9**. Reagents and conditions: a) NIS, AgOTf,  $-20\text{ }^{\circ}\text{C}$ , 30 min, 85%; b) NaOCH<sub>3</sub>, CH<sub>3</sub>OH/CH<sub>2</sub>Cl<sub>2</sub>, 1 h; c) CH<sub>3</sub>I, NaH, DMF, 1 h; d) 5% TFA, CH<sub>2</sub>Cl<sub>2</sub>,  $0\text{ }^{\circ}\text{C}$ , 30 min, 80% over three steps; e) NIS, AgOTf, CH<sub>2</sub>Cl<sub>2</sub>,  $-40\text{ }^{\circ}\text{C}$ , 30 min, 83%; f) *p*-TSA, CH<sub>3</sub>OH/CH<sub>2</sub>Cl<sub>2</sub>, 3 h; g) Pd/C, H<sub>2</sub>, CH<sub>3</sub>OH/CH<sub>2</sub>Cl<sub>2</sub>, overnight, 79% over two steps.

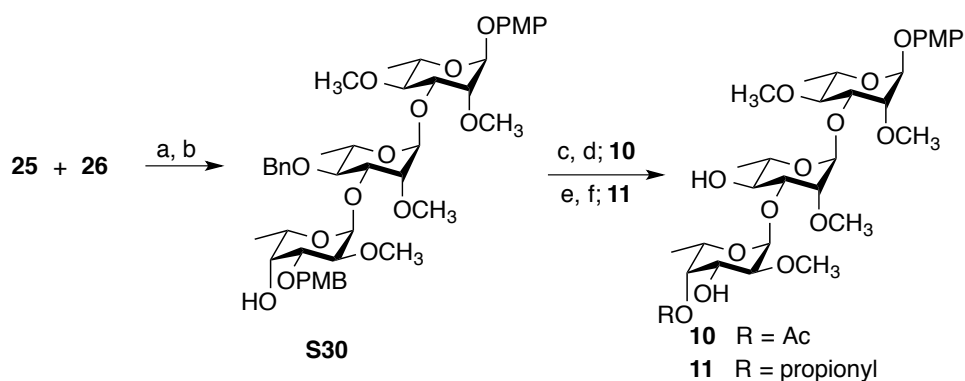

**Scheme S8.** Synthesis of trisaccharide **10** and **11**. Reagents and conditions: a) NIS, AgOTf,  $-40\text{ }^{\circ}\text{C}$ , 30 min; b)  $(\text{Ph}_3\text{P})_4\text{Pd}$ , HOAc, overnight, 71% over two steps; c)  $\text{Ac}_2\text{O}$ , pyridine, 2 h; d) Pd/C,  $\text{H}_2$ ,  $\text{CH}_3\text{OH}/\text{CH}_2\text{Cl}_2$  overnight, 81% over two steps; e) 1.  $(\text{C}_2\text{H}_7\text{CO})_2\text{O}$ , pyridine, 2 h; f) Pd/C,  $\text{H}_2$ ,  $\text{CH}_3\text{OH}/\text{CH}_2\text{Cl}_2$ , overnight, 76% over two steps.

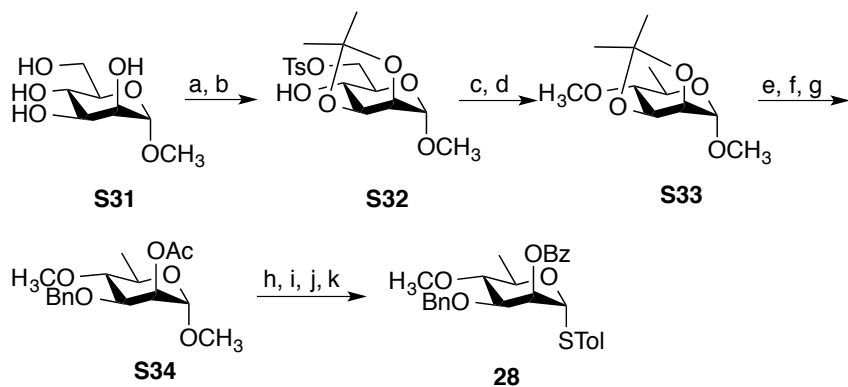

**Scheme S9.** Synthesis of building block **28**. Reagents and conditions: a) TsCl, pyridine, DMAP, overnight; b) 2,2-Dimethoxypropane, acetone, 2 h, 78% over two steps; c)  $\text{NaBH}_4$ , DMSO,  $80\text{ }^{\circ}\text{C}$ , 8h; d)  $\text{CH}_3\text{I}$ , NaH, DMF, 1 h, 69 % over two steps; e) *p*-TSA,  $\text{CH}_2\text{Cl}_2/\text{CH}_3\text{OH}$ , 3h; f)  $\text{Bu}_2\text{SnO}$ , toluene,  $130\text{ }^{\circ}\text{C}$ , 1h;  $\text{BnBr}$ , *n*- $\text{Bu}_4\text{NBr}$ ,  $63\text{ }^{\circ}\text{C}$ , overnight; g)  $\text{Ac}_2\text{O}$ , pyridine, 1 h, 79% over three steps, h)  $\text{Ac}_2\text{O}$ ,  $\text{H}_2\text{SO}_4$ ,  $0\text{ }^{\circ}\text{C}$ , 2h; i) TolSH,  $\text{BF}_3 \cdot \text{Et}_2\text{O}$ ,  $\text{CH}_2\text{Cl}_2$ ,  $-20\text{ }^{\circ}\text{C}$ , 5h; j)  $\text{NaOCH}_3$ ,  $\text{CH}_2\text{Cl}_2/\text{CH}_3\text{OH}$ , 2 h; k) BzCl, pyridine, 2h, 53% over four steps.

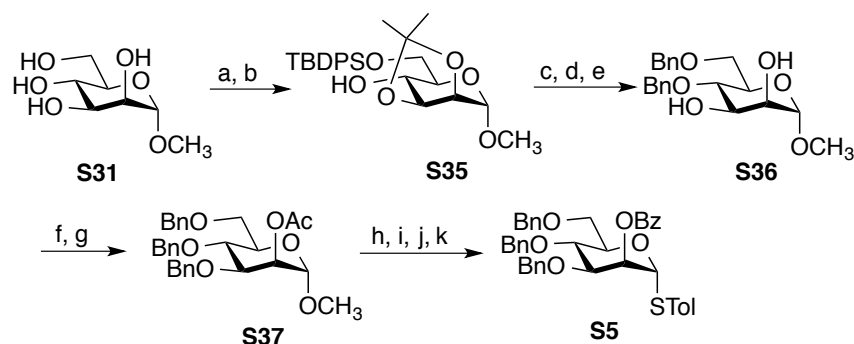

**Scheme S10.** Synthesis of building block **S5**. Reagents and conditions: a) TBDPSCl, Et<sub>3</sub>N, pyridine, 60 °C, 3 h; b) DMP, *p*-TSA, acetone, 3 h, 88%, over two steps; c) TBAF, THF, 2 h; d) BnBr, NaH, DMF, 2 h; e) *p*-TSA, CH<sub>3</sub>OH, overnight, 74% over three steps; f) *n*-Bu<sub>2</sub>SnO, toluene, 120 °C, 1 h; BnBr, *n*-Bu<sub>4</sub>NI, 62 °C, overnight; g) Ac<sub>2</sub>O, pyridine, 1 h, 84% over two steps; h) Ac<sub>2</sub>O, H<sub>2</sub>SO<sub>4</sub>, 0 °C, 1 h; i) TolSH, BF<sub>3</sub>.Et<sub>2</sub>O, CH<sub>2</sub>Cl<sub>2</sub>, 0 °C, overnight; j) NaOCH<sub>3</sub>, CH<sub>3</sub>OH/CH<sub>2</sub>Cl<sub>2</sub>, 2 h; k) BzCl, pyridine, 0 °C to r.t., 3 h, 59 % over four steps.

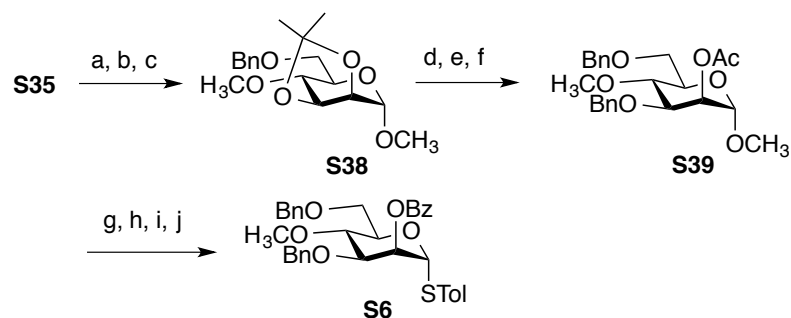

**Scheme S11.** Synthesis of building block **S6**. Reagents and conditions: a) CH<sub>3</sub>I, NaH, DMF, 1 h; b) TBAF, THF, 2 h; c) BnBr, NaH, DMF, 3 h, 78% over three steps; d) *p*-TSA, CH<sub>3</sub>OH/CH<sub>2</sub>Cl<sub>2</sub>, 4 h; e) *n*-Bu<sub>2</sub>SnO, toluene, 120 °C, 1 h; BnBr, *n*-Bu<sub>4</sub>NI, 62 °C, 7 h; f) Ac<sub>2</sub>O, pyridine, 1 h, 73%, over three steps; g) Ac<sub>2</sub>O, H<sub>2</sub>SO<sub>4</sub>, 0 °C, 1 h; h) TolSH, BF<sub>3</sub>.Et<sub>2</sub>O, CH<sub>2</sub>Cl<sub>2</sub>, 0 °C, overnight; i) NaOCH<sub>3</sub>, CH<sub>3</sub>OH/CH<sub>2</sub>Cl<sub>2</sub>, 2 h; j) BzCl, pyridine, 0 °C to r.t., 2 h, 61 % over four steps.

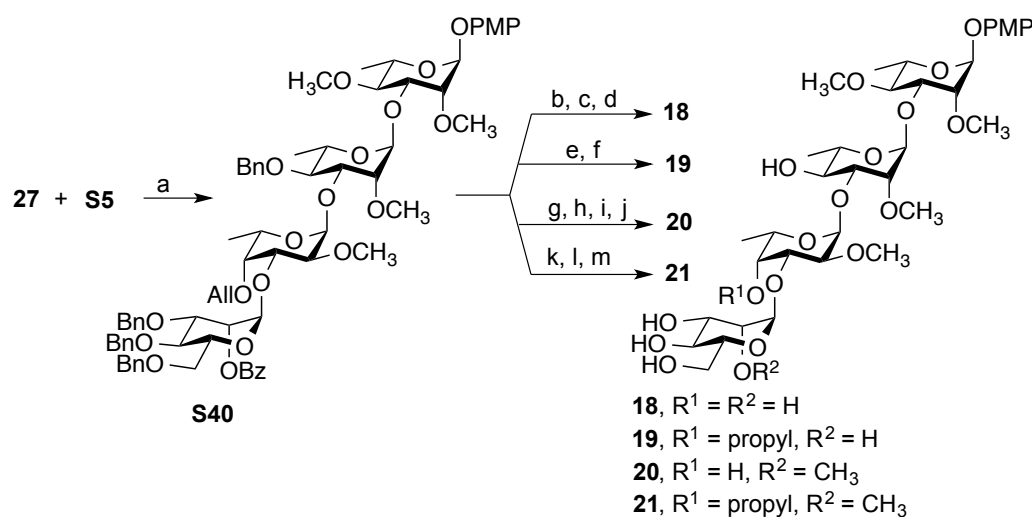

**Scheme S12.** Synthesis of tetrasaccharides **18–21**. Reagents and conditions: a) NIS, AgOTf, CH<sub>2</sub>Cl<sub>2</sub>, –20 °C, 3 min, 68%; b) NaOCH<sub>3</sub>, CH<sub>3</sub>OH /CH<sub>2</sub>Cl<sub>2</sub>, 3 h; c) (Ph<sub>3</sub>P)<sub>4</sub>Pd, HOAc, overnight; d) Pd/C, H<sub>2</sub>, CH<sub>3</sub>OH/CH<sub>2</sub>Cl<sub>2</sub>, three days, 69% over three steps; e) NaOCH<sub>3</sub>, CH<sub>3</sub>OH/CH<sub>2</sub>Cl<sub>2</sub>, 3 h; f) Pd/C, CH<sub>3</sub>OH/CH<sub>2</sub>Cl<sub>2</sub>, overnight, 73% over two steps; g) NaOCH<sub>3</sub>, CH<sub>3</sub>OH/CH<sub>2</sub>Cl<sub>2</sub>, 3 h; h) CH<sub>3</sub>I, NaH, DMF, 1 h; i) (Ph<sub>3</sub>P)<sub>4</sub>Pd, HOAc, overnight; j) Pd/C, H<sub>2</sub>, two days, 60 % over four steps; k) NaOCH<sub>3</sub>, CH<sub>3</sub>OH/CH<sub>2</sub>Cl<sub>2</sub>, 3 h; l) CH<sub>3</sub>I, NaH, DMF, 1 h; m) Pd/C, H<sub>2</sub>, CH<sub>3</sub>OH/CH<sub>2</sub>Cl<sub>2</sub>, overnight, 71% over three steps.

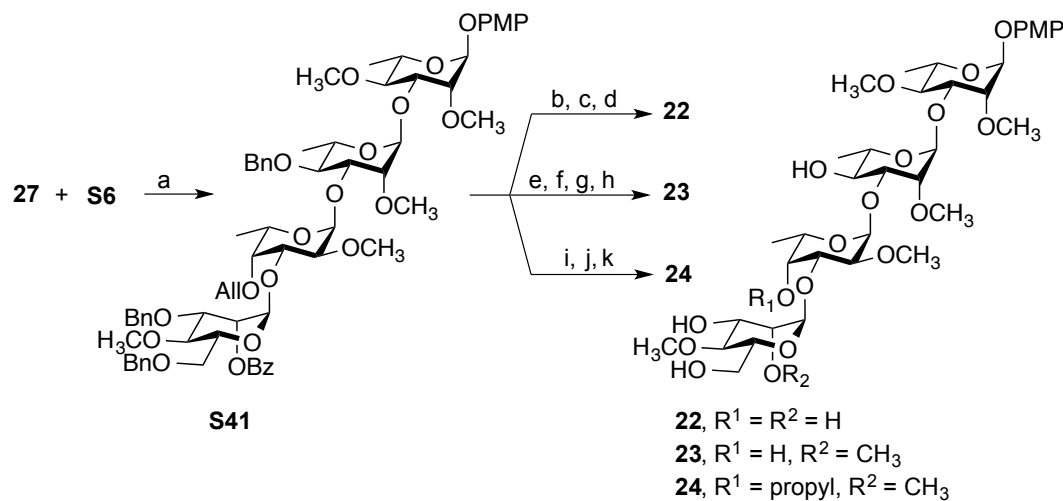

**Scheme S13.** Synthesis of tetrasaccharides **22–24**. Reagents and conditions: a) NIS, AgOTf, CH<sub>2</sub>Cl<sub>2</sub>, –20 °C, 3 min, 63%; b) NaOCH<sub>3</sub>, CH<sub>3</sub>OH/CH<sub>2</sub>Cl<sub>2</sub>, 4 h; c) (Ph<sub>3</sub>P)<sub>4</sub>Pd, HOAc, overnight; d) Pd/C, H<sub>2</sub>, CH<sub>3</sub>OH/CH<sub>2</sub>Cl<sub>2</sub>, overnight, 81% over three steps; e) NaOCH<sub>3</sub>, CH<sub>3</sub>OH/CH<sub>2</sub>Cl<sub>2</sub>, 4 h; h) CH<sub>3</sub>I, NaH, DMF, 1 h; g) (Ph<sub>3</sub>P)<sub>4</sub>Pd, HOAc, overnight; h) Pd/C, H<sub>2</sub>, CH<sub>3</sub>OH/CH<sub>2</sub>Cl<sub>2</sub>, overnight, 71% over four steps; i) NaOCH<sub>3</sub>, CH<sub>3</sub>OH/CH<sub>2</sub>Cl<sub>2</sub>, 4 h; j) CH<sub>3</sub>I, NaH, DMF, 1 h; k) Pd/C, H<sub>2</sub>, CH<sub>3</sub>OH/CH<sub>2</sub>Cl<sub>2</sub>, overnight, 74% over three steps.

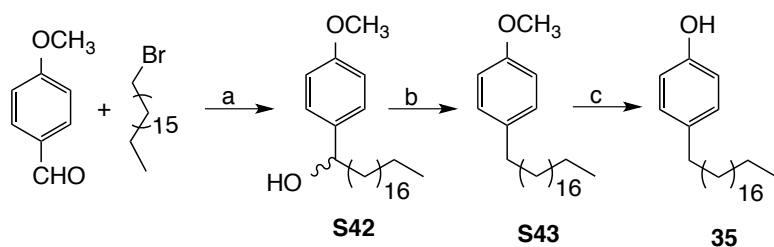

**Scheme S14.** Synthesis of building block **35**. Reagents and conditions: a) Mg, THF, r.t. to 50 °C for 3 h, 75%; b) Me<sub>3</sub>SiH, BF<sub>3</sub>·Et<sub>2</sub>O, CH<sub>2</sub>Cl<sub>2</sub>, 1h, 94%; c) BCl<sub>3</sub>, *n*-Bu<sub>4</sub>NI, CH<sub>2</sub>Cl<sub>2</sub>, -78 °C to rt, 1 h, 96%.

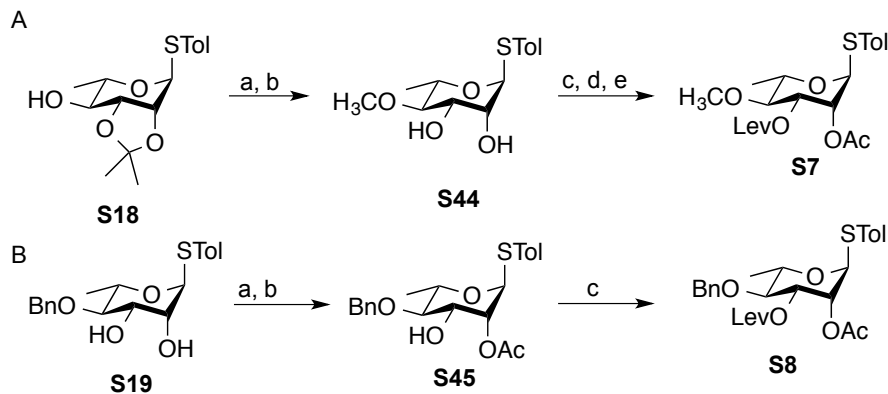

**Scheme S15.** Synthesis of building blocks **S7** and **S8**. Reagents and conditions: (A) a) CH<sub>3</sub>I, NaH, DMF, 1h; b) *p*-TSA, CH<sub>3</sub>OH/CH<sub>2</sub>Cl<sub>2</sub>, 3h, 84% over two steps; c) TEOA, CH<sub>2</sub>Cl<sub>2</sub>, CSA, 2 h; d) 70% AcOH, 30 min; e) LA, DCC, DMAP, 3 h, 82% over three steps. (B) a) TEOA, CH<sub>2</sub>Cl<sub>2</sub>, CSA, 2 h; b) 70% AcOH, 30 min; c) LA, DCC, DMAP, CH<sub>2</sub>Cl<sub>2</sub>, 3 h, 79% over three steps.

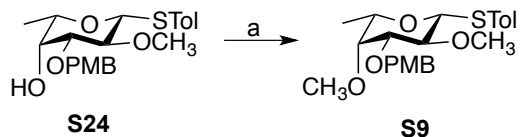

**Scheme S16.** Synthesis of building block **S9**. Reagents and conditions: a) CH<sub>3</sub>I, NaH, DMF, 1 h, 89%.

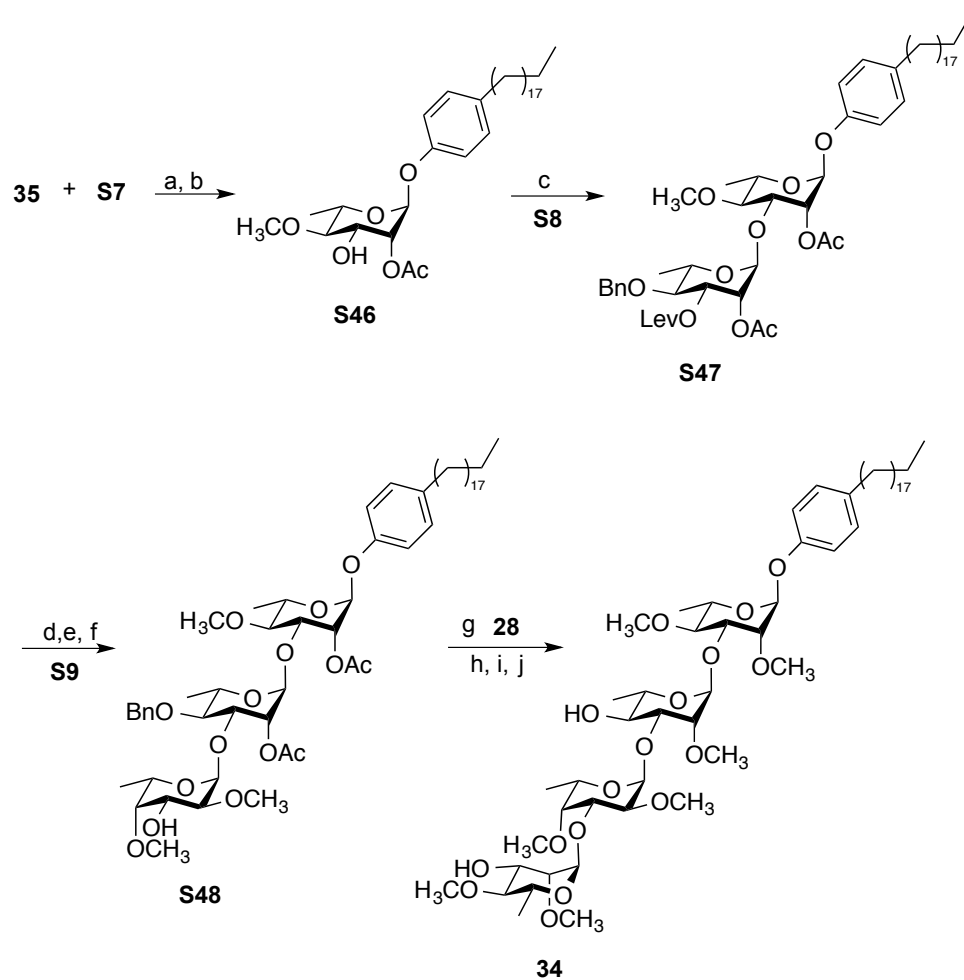

**Scheme S17.** Synthesis of glycolipid **34**. Reagents and conditions: a) NIS, AgOTf, CH<sub>2</sub>Cl<sub>2</sub>, -20 °C, 30 min; b) NH<sub>2</sub>NH<sub>2</sub>·HAc, CH<sub>2</sub>Cl<sub>2</sub>, 5 h, 66 % over two steps; c) NIS, AgOTf, CH<sub>2</sub>Cl<sub>2</sub>, -20 °C, 30 min, 79%; d) NH<sub>2</sub>NH<sub>2</sub>·HAc, CH<sub>2</sub>Cl<sub>2</sub>, 5 h; e) NIS, AgOTf, CH<sub>2</sub>Cl<sub>2</sub>, -20 °C, 30 min; f) 5% TFA, CH<sub>2</sub>Cl<sub>2</sub>, 0 °C, 45 min, 39 % over three steps; g) NIS, AgOTf, CH<sub>2</sub>Cl<sub>2</sub>, -20 °C, 30 min; h) NaOCH<sub>3</sub>, CH<sub>2</sub>Cl<sub>2</sub>/CH<sub>3</sub>OH, 4 h; i) CH<sub>3</sub>I, NaH, DMF, 1 h; j) Pd/C, H<sub>2</sub>, CH<sub>2</sub>Cl<sub>2</sub>/CH<sub>3</sub>OH, overnight, 54% over four steps.

## Experimental

### General Methods

Solvents used in reactions were purified by successive passage through columns of alumina and copper under an argon atmosphere before use. All reagents used in reactions were purchased from commercial sources and were used without further purification unless noted otherwise. All reactions were carried out under a positive pressure of argon atmosphere and monitored by TLC on Silica Gel G-25 UV<sub>254</sub> (0.25 mm) unless stated otherwise. Spots were detected under UV light and/or by charring with a solution of anisaldehyde in ethanol, acetic acid, and H<sub>2</sub>SO<sub>4</sub>. Column chromatography was performed on Silica Gel 60 (40–60 μm). The ratio between silica gel and residue ranged from 100:1 to 20:1 (w/w). Organic solutions were concentrated under vacuum at < 50 °C. <sup>1</sup>H NMR and <sup>13</sup>C NMR spectra were recorded at 400 or 500 MHz. <sup>1</sup>H NMR chemical shifts are referenced to TMS (0.0, CDCl<sub>3</sub>) or CD<sub>3</sub>OD (4.78, CD<sub>3</sub>OD). <sup>13</sup>C NMR chemical shifts are referenced to CDCl<sub>3</sub> (77.23, CDCl<sub>3</sub>). <sup>1</sup>H NMR data are reported as though they are first order and the peak assignments were made on the basis of 2D-NMR (<sup>1</sup>H–<sup>1</sup>H COSY and HMQC) experiments. The monosaccharide residues in the disaccharide and trisaccharides are labelled by no prime, prime, double, and tri–prime as shown in Figure 1 and these labels are maintained in the assignment of NMR spectra of all compounds. Optical rotations were measured at 21 ± 2 °C at the sodium D line (589 nm) and are in units of deg•mL(dm•g)<sup>-1</sup>. ESI-MS spectra were carried out on samples suspended in DCM or CH<sub>3</sub>OH and added NaCl.

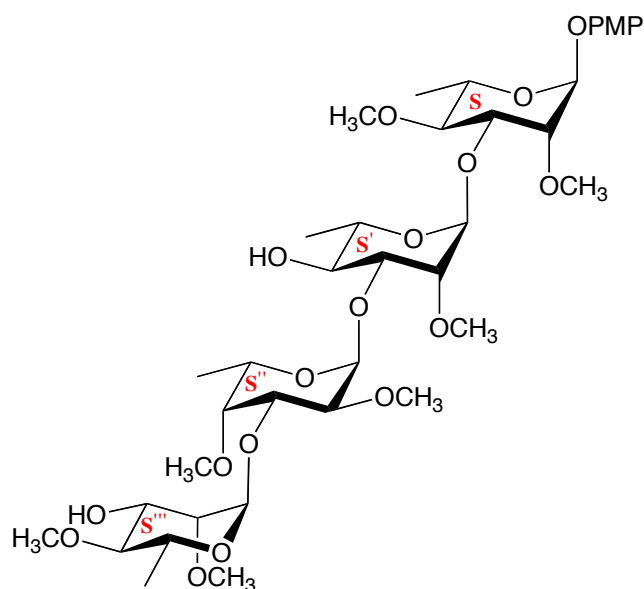

Numbering system for labelling data.

***p*-Methoxyphenyl 2-*O*-methyl- $\alpha$ -L-fucopyranosyl-(1 $\rightarrow$ 3)-2-*O*-methyl- $\alpha$ -L-rhamnopyranosyl-(1 $\rightarrow$ 3)-2-*O*-methyl- $\alpha$ -L-rhamnopyranoside (8)**

To a solution of **S27** (16.5 mg, 0.02 mmol) in 1:1 CH<sub>3</sub>OH–CH<sub>3</sub>Cl<sub>2</sub> (10 mL), *p*-TSA (3 mg) was added and the solution was stirred for 3 h at rt. The reaction mixture was neutralized with Et<sub>3</sub>N (50  $\mu$ L), concentrated and the resulting residue was purified by chromatography (1:2 hexane–EtOAc) to give a syrup. The syrup was dissolved in 1:1 CH<sub>3</sub>OH–CH<sub>3</sub>Cl<sub>2</sub> (15 mL), Pd–C (3 mg) was added and the reaction mixture was stirred overnight under a hydrogen atmosphere at rt. The reaction mixture was then filtered, concentrated and the resulting residue was purified by chromatography (15:1 CH<sub>2</sub>Cl<sub>2</sub>–CH<sub>3</sub>OH) to give **8** (10.5 mg, 87 %) as a colorless thick syrup: *R*<sub>f</sub> 0.45 (15:1 CH<sub>2</sub>Cl<sub>2</sub>–CH<sub>3</sub>OH); [ $\alpha$ ]<sub>D</sub> +67.8 (*c* 0.3, CHCl<sub>3</sub>); <sup>1</sup>H NMR (500 MHz, CDCl<sub>3</sub>,  $\delta$ <sub>H</sub>) 7.02–6.99 (m, 2H, Ar-2,6), 6.85–6.82 (m, 2H, Ar-3,5), 5.44 (d, 1H, *J*<sub>1,2</sub> = 1.7 Hz, H-1), 5.20 (d, 1H, *J*<sub>1',2'</sub> = 1.8 Hz, H-1'), 5.14 (d, 1H, *J*<sub>1'',2''</sub> = 3.4 Hz, H-1''), 4.25–4.21 (m, 1H, H-5''), 4.07–4.03 (m, 2H, H-3, H-3'), 3.89 (dq, 1H, *J*<sub>4',5'</sub> = 9.4 Hz, *J*<sub>5',6'</sub> = 6.3 Hz, H-5'), 3.84–3.83 (m, 1H, H-5), 3.80–3.74 (m, 3H, H-4, H-4', H-4''), 3.78 (s, 3H, OCH<sub>3</sub>), 3.72–3.68 (m, 1H, H-3''), 3.66 (dd, 1H, *J*<sub>1,2</sub> = 1.7 Hz, *J*<sub>2,3</sub> = 3.3 Hz, H-2), 3.64–3.61 (m, 1H, H-2') 3.54 (s, 3H, OCH<sub>3</sub>), 3.52–3.51 (m, 1H, H-2''), 3.50 (s, 3H, OCH<sub>3</sub>), 3.46 (s, 3H, OCH<sub>3</sub>), 2.52



(br s, 1H, OH), 2.31 (br s, 2H, OH x 2), 1.35 (d, 3H,  $J_{5'',6''} = 6.4$  Hz, H-6''), 1.31 (d, 3H,  $J_{5,6} = 6.3$  Hz, H-6), 1.29 (d, 3H,  $J_{5',6'} = 6.3$  Hz, H-6');  $^{13}\text{C}$  NMR (125.7 MHz,  $\text{CDCl}_3$ ,  $\delta_{\text{C}}$ ) 155.0 (Ar), 150.5 (Ar), 117.5 (Ar x 2), 114.7 (Ar x 2), 99.8, 99.2, 95.5, 83.0, 80.2, 80.1(4), 80.1, 79.5, 71.9, 71.7, 71.5, 69.9, 69.0, 68.9, 66.5, 59.3 (OCH<sub>3</sub>), 58.7 (OCH<sub>3</sub>), 58.6 (OCH<sub>3</sub>), 55.7 (OCH<sub>3</sub>), 18.0, 17.8, 16.4. HRMS (ESI) Calcd. for (M + Na)<sup>+</sup> C<sub>28</sub>H<sub>44</sub>NaO<sub>14</sub>: 627.2623. Found 627.2621.

***p*-Methoxyphenyl 2-*O*-methyl- $\alpha$ -L-fucopyranosyl-(1 $\rightarrow$ 3)-2-*O*-methyl- $\alpha$ -L-rhamnopyranosyl-(1 $\rightarrow$ 3)-2,4-di-*O*-methyl- $\alpha$ -L-rhamnopyranoside (9)**

To a solution of **S29** (10 mg, 0.013 mmol) in 1:1 CH<sub>3</sub>OH–CH<sub>2</sub>Cl<sub>2</sub> (10 mL), *p*-TSA (2 mg) was added. The reaction mixture was stirred for 3 h at rt before the addition of Et<sub>3</sub>N (50  $\mu$ L) and concentration. The resulting residue was purified by chromatography (1:2 hexane–EtOAc) to give a colorless oil (8 mg). The oil was dissolved in 1:1 CH<sub>3</sub>OH–CH<sub>2</sub>Cl<sub>2</sub> (20 mL), Pd–C (2 mg, 20% w/w) was added and the reaction mixture was stirred overnight under a hydrogen atmosphere at rt. The reaction mixture was filtered, concentrated and the resulting crude product was purified by chromatography (15:1 CH<sub>2</sub>Cl<sub>2</sub>–CH<sub>3</sub>OH) to give **9** (7.5 mg, 90%) as a thick syrup:  $R_f$  0.55 (15:1 CH<sub>2</sub>Cl<sub>2</sub>–CH<sub>3</sub>OH);  $[\alpha]_{\text{D}} -19.8$  ( $c$  0.5, CHCl<sub>3</sub>);  $^1\text{H}$  NMR (500 MHz,  $\text{CDCl}_3$ ,  $\delta_{\text{H}}$ ) 7.02–6.99 (m, 2H, Ar-2,6), 6.85–6.82 (m, 2H, Ar-3,5), 5.44 (d, 1H,  $J_{1,2} = 1.8$  Hz, H-1), 5.20 (d, 1H,  $J_{1',2'} = 1.7$  Hz, H-1'), 5.14 (d, 1H,  $J_{1'',2''} = 3.4$  Hz, H-1''), 4.24 (dq, 1H,  $J_{4'',5''} = 2.7$  Hz,  $J_{5'',6''} = 6.5$  Hz, H-5''), 4.10 (dd, 1H,  $J_{2,3} = 3.3$  Hz,  $J_{3,4} = 9.6$  Hz, H-3), 4.05 (dd, 1H,  $J_{2',3'} = 3.0$  Hz,  $J_{3',4'} = 9.5$  Hz, H-3'), 3.87 (dq, 1H,  $J_{4',5'} = 9.5$  Hz,  $J_{5',6'} = 6.2$  Hz, H-5'), 3.84–3.83 (m, 1H, H-3''), 3.77–3.74 (m, 1H, H-5), 3.78 (s, 3H, OCH<sub>3</sub>), 3.71–3.68 (m, 2H, H-2'', H-4''), 3.67 (dd, 1H,  $J_{1',2'} = 1.7$  Hz,  $J_{2',3'} = 3.0$  Hz, H-2'), 3.60 (app t, 1H,  $J_{3',4'} = J_{4',5'} = 9.5$  Hz, H-4'), 3.55 (s, 3H, OCH<sub>3</sub>), 3.53 (s, 3H, OCH<sub>3</sub>), 3.52 (s, 3H, OCH<sub>3</sub>), 3.51–3.49 (m, 1H, H-2), 3.46 (s, 3H, OCH<sub>3</sub>), 3.22 (app t, 1H,  $J_{3,4} = J_{4,5} = 9.6$  Hz, H-4), 2.80 (br s, 1H, OH), 2.43 (br s, 1H, OH), 1.68 (br s, 1H, OH), 1.35 (d, 3H,  $J_{5'',6''} = 6.5$  Hz, H-6''), 1.31 (d, 3H,  $J_{5,6} = 6.2$  Hz, H-6), 1.29 (d, 3H,  $J_{5',6'} = 6.2$  Hz, H-6');  $^{13}\text{C}$  NMR (125.7 MHz,  $\text{CDCl}_3$ ,  $\delta_{\text{C}}$ ) 155.0 (Ar), 150.5 (Ar), 117.5 (Ar x 2), 114.7 (Ar x 2), 99.8, 99.2, 95.5,



(OCH<sub>3</sub>), 59.0 (OCH<sub>3</sub>), 58.5 (OCH<sub>3</sub>), 55.7 (OCH<sub>3</sub>), 20.8 (CH<sub>3</sub>CO), 17.8(8), 17.8(4), 16.3. HRMS (ESI) Calcd. for (M + Na)<sup>+</sup> C<sub>31</sub>H<sub>48</sub>NaO<sub>15</sub>: 683.2885. Found 683.2880.

***p*-Methoxyphenyl**                      **2-*O*-methyl-4-*O*-propionyl- $\alpha$ -L-fucopyranosyl-(1 $\rightarrow$ 3)-2-*O*-methyl- $\alpha$ -L-rhamnopyranosyl-(1 $\rightarrow$ 3)-2,4-di-*O*-methyl- $\alpha$ -L-rhamnopyranoside (11)**

To a solution of **S30** (10 mg, 0.012 mmol) in pyridine (2 mL), propanoic anhydride (1 mL) was added and the reaction mixture was stirred for 2 h at rt. After 2 h, water (5 mL) was added and the solution was diluted with CH<sub>2</sub>Cl<sub>2</sub> (10 mL), washed with water (2 x 8 mL), 1M HCl soln (2 x 8 mL) and brine (8 mL). The organic layer was separated, concentrated and the resulting crude product was purified by chromatography (2:1 hexane–EtOAc) to give a syrup. This syrup was dissolved in the 1:1 CH<sub>2</sub>Cl<sub>2</sub>–CH<sub>3</sub>OH (20 mL), Pd–C (2 mg) was added and the reaction mixture was stirred overnight under hydrogen. The reaction mixture was then filtered, concentrated and the resulting residue was purified by chromatography (10:0.25 CH<sub>2</sub>Cl<sub>2</sub>–CH<sub>3</sub>OH) to give **11** (7.4 mg, 88%) as a thick syrup: *R*<sub>f</sub> 0.60 (20:1, CH<sub>2</sub>Cl<sub>2</sub>–CH<sub>3</sub>OH); [ $\alpha$ ]<sub>D</sub> –21.3 (*c* 0.5, CHCl<sub>3</sub>); <sup>1</sup>H NMR (500 MHz, CDCl<sub>3</sub>,  $\delta$ <sub>H</sub>) 7.00–6.97 (m, 2H, Ar-2,6), 6.83–6.80 (m, 2H, Ar-3,5), 5.39 (d, 1H, *J*<sub>1,2</sub> = 1.8 Hz, H-1), 5.23 (m, 1H, H-4''), 5.17 (d, 1H, *J*<sub>1',2'</sub> = 1.7 Hz, H-1'), 5.14 (d, 1H, *J*<sub>1'',2''</sub> = 3.3 Hz, H-1''), 4.31 (dq, 1H, *J*<sub>4'',5''</sub> = 2.1 Hz, *J*<sub>5'',6''</sub> = 6.5 Hz, H-5''), 4.23 (dd, 1H, *J*<sub>2',3'</sub> = 3.5 Hz, *J*<sub>3',4'</sub> = 9.7 Hz, H-3'), 4.10 (dd, 1H, *J*<sub>2,3</sub> = 3.3 Hz, *J*<sub>3,4</sub> = 9.6 Hz, H-3), 3.86 (dq, 1H, *J*<sub>4',5'</sub> = 9.7 Hz, *J*<sub>5',6'</sub> = 6.2 Hz, H-5'), 3.78–3.76 (m, 1H, H-5), 3.75 (s, 3H, OCH<sub>3</sub>), 3.71–3.68 (m, 2H, H-2', H-3''), 3.65–3.63 (m, 2H, H-2, H-4'), 3.55 (s, 3H, OCH<sub>3</sub>), 3.54 (s, 3H, OCH<sub>3</sub>), 3.52 (s, 3H, OCH<sub>3</sub>), 3.48 (dd, 1H, *J*<sub>1'',2''</sub> = 3.3 Hz, *J*<sub>2'',3''</sub> = 9.8 Hz, H-2''), 3.46 (s, 3H, OCH<sub>3</sub>), 3.22 (app t, 1H, *J*<sub>3,4</sub> = *J*<sub>4,5</sub> = 9.6 Hz, H-4), 2.47 (q, 2H, *J* = 7.6 Hz, CH<sub>2</sub>CH<sub>3</sub>), 1.35 (d, 3H, *J*<sub>5',6'</sub> = 6.2 Hz, H-6'), 1.26 (d, 3H, *J*<sub>5,6</sub> = 6.2 Hz, H-6), 1.19 (t, 3H, *J* = 7.6 Hz, CH<sub>3</sub>CH<sub>2</sub>), 1.12 (d, 3H, *J*<sub>5'',6''</sub> = 6.5 Hz, H-6''); <sup>13</sup>C NMR (125.7 MHz, CDCl<sub>3</sub>,  $\delta$ <sub>C</sub>) 174.8 (C=O), 154.9 (Ar), 150.4 (Ar), 117.5 (Ar x 2), 114.6 (Ar x 2), 100.0, 99.2, 95.6, 83.0, 82.3, 80.5, 80.3, 79.4, 79.0, 73.2, 71.5, 69.0, 68.7, 68.7, 65.6, 61.0 (OCH<sub>3</sub>), 59.3 (OCH<sub>3</sub>),

59.0 (OCH<sub>3</sub>), 58.5 (OCH<sub>3</sub>), 55.7 (OCH<sub>3</sub>), 27.5 (CH<sub>2</sub>CH<sub>3</sub>), 17.8(9), 17.8(4), 16.3, 9.3 (CH<sub>3</sub>CH<sub>2</sub>). HRMS (ESI) Calcd. for (M + Na)<sup>+</sup> C<sub>32</sub>H<sub>50</sub>NaO<sub>15</sub>: 697.3042. Found 697.3037.

***p*-Methoxyphenyl α-D-mannopyranosyl-(1→3)-2-O-methyl-α-L-fucopyranosyl-(1→3)-2-O-methyl-α-L-rhamnopyranosyl-(1→3)-2,4-di-O-methyl-α-L-rhamnopyranoside (18)**

To a solution of **S40** (15 mg, 0.012 mmol) in 1:1 CH<sub>3</sub>OH–CH<sub>2</sub>Cl<sub>2</sub> (10 mL), 1M NaOCH<sub>3</sub> (0.5 mL) was added. The reaction mixture was stirred for 3 h at rt before it was neutralized by the addition of Amberlite IR-120 H<sup>+</sup> resin, filtered and concentrated. The resulting residue was dissolved in AcOH (5 mL), (Ph<sub>3</sub>P)<sub>4</sub>Pd (4 mg, 10% w/w) was added and the reaction mixture was stirred overnight at rt and then it was filtered. The filtrate was diluted with water (10 mL) and CH<sub>2</sub>Cl<sub>2</sub> (20 mL), being washed with water (2 x 10 mL), and brine (10 mL). The organic layer was dried (NaSO<sub>4</sub>), concentrated and the resulting residue was purified by chromatography (2:1 hexane–EtOAc) to give a colorless oil. To the solution of the oil in 1:1 CH<sub>3</sub>OH–CH<sub>2</sub>Cl<sub>2</sub> (15 mL), Pd–C (3 mg) was added and the reaction mixture was stirred overnight under hydrogen. The reaction mixture was then filtered, concentrated and the resulting residue was purified by chromatography (20:1 CH<sub>2</sub>Cl<sub>2</sub>–CH<sub>3</sub>OH) to give **18** (7.6 mg, 81%) as an amorphous solid: *R*<sub>f</sub> 0.4 (10:0.75 CH<sub>2</sub>Cl<sub>2</sub>–CH<sub>3</sub>OH); [α]<sub>D</sub> –45.3 (*c* 0.7, CHCl<sub>3</sub>); <sup>1</sup>H NMR (500 MHz, CDCl<sub>3</sub>, δ<sub>H</sub>) 7.01–6.98 (m, 2H, Ar-2,6), 6.68–6.82 (m, 2H, Ar-3,5), 5.42 (d, 1H, *J*<sub>1,2</sub> = 1.8 Hz, H-1), 5.20 (d, 1H, *J*<sub>1'',2''</sub> = 3.2 Hz, H-1''), 5.13 (d, 1H, *J*<sub>1',2'</sub> = 1.7 Hz, H-1'), 5.04 (d, 1H, *J*<sub>1''',2'''</sub> = 1.6 Hz, H-1'''), 4.12–4.04 (m, 2H, H-3', H-5), 4.00 (dd, 1H, *J*<sub>2,3</sub> = 3.2 Hz, *J*<sub>3,4</sub> = 9.6 Hz, H-3), 3.90–3.88 (m, 2H, H-3'', H-5'), 3.86–3.81 (m, 4H, H-5'', H-5''', H-6''' x 2), 3.78 (dd, 1H, *J*<sub>1'',2'''</sub> = 1.6 Hz, *J*<sub>2''',3'''</sub> = 3.1 Hz, H-2'''), 3.74 (s, 3H, OCH<sub>3</sub>), 3.72–3.72 (m, 1H, H-2), 3.68–3.62 (m, 4H, H-2', H-2'', H-3''', H-4'), 3.58–3.56 (m, 2H, H-4'', H-4'''), 3.54 (s, 3H, OCH<sub>3</sub>), 3.52 (s, 3H, OCH<sub>3</sub>), 3.50 (s, 3H, OCH<sub>3</sub>), 3.47 (s, 3H, OCH<sub>3</sub>), 3.21 (app t, 1H, *J*<sub>3,4</sub> = *J*<sub>4,5</sub> = 9.6 Hz, H-4), 1.29 (d, 3H, *J*<sub>5'',6''</sub> = 6.5 Hz, H-6''), 1.22 (d, 3H, *J*<sub>5',6'</sub> = 6.2 Hz, H-6'), 1.20 (d, 3H, *J*<sub>5,6</sub> = 6.2 Hz, H-6); <sup>13</sup>C NMR (125.7 MHz, CDCl<sub>3</sub>, δ<sub>C</sub>) 154.9 (Ar), 150.4 (Ar), 117.5 (Ar x 2), 114.6 (Ar x 2), 101.8, 100.1, 98.9, 95.56, 82.4(9), 82.4(8), 82.2, 80.7, 80.3, 79.2, 78.4, 78.3,

73.8, 71.3, 71.3, 71.0, 69.0, 68.7, 66.9, 66.5, 61.3, 61.1 (OCH<sub>3</sub>), 59.2 (OCH<sub>3</sub>), 59.0 (OCH<sub>3</sub>), 58.3 (OCH<sub>3</sub>), 55.6 (OCH<sub>3</sub>), 18.0, 17.8, 16.4. HRMS (ESI) Calcd. for (M + Na)<sup>+</sup> C<sub>35</sub>H<sub>56</sub>NaO<sub>19</sub>: 803.3308. Found 803.3303.

***p*-Methoxyphenyl  $\alpha$ -D-mannopyranosyl-(1 $\rightarrow$ 3)-2-*O*-methyl-4-*O*-propyl- $\alpha$ -L-fucopyranosyl-(1 $\rightarrow$ 3)-2-*O*-methyl- $\alpha$ -L-rhamnopyranosyl-(1 $\rightarrow$ 3)-2,4-di-*O*-methyl- $\alpha$ -L-rhamnopyranoside (19)**

To a solution of **S40** (15 mg, 0.012 mmol) in 1:1 CH<sub>3</sub>OH–CH<sub>2</sub>Cl<sub>2</sub> (15 mL), 1M NaOCH<sub>3</sub> (0.15 mL) was added and the reaction mixture was stirred for 4 h at rt. It was then neutralized with Amberlite IR-120 H<sup>+</sup> resin, filtered and concentrated. The resulting crude product was purified by chromatography (2:1 hexane–EtOAc) to give a syrup. To the solution of this syrup in 1:1 CH<sub>3</sub>OH–CH<sub>2</sub>Cl<sub>2</sub> (20 mL), Pd–C (4 mg) was added and the reaction mixture was stirred overnight under a hydrogen atmosphere. The reaction mixture was then filtered, concentrated and the resulting residue was purified by chromatography (20:1 CH<sub>2</sub>Cl<sub>2</sub>–CH<sub>3</sub>OH) to give **19** (8.6 mg, 87%) as an amorphous solid: *R*<sub>f</sub> 0.55 (20:1 CH<sub>2</sub>Cl<sub>2</sub>–CH<sub>3</sub>OH); [ $\alpha$ ]<sub>D</sub> –33.2 (*c* 0.6, CHCl<sub>3</sub>); <sup>1</sup>H NMR (500 MHz, CDCl<sub>3</sub>,  $\delta$ <sub>H</sub>) 7.01–6.98 (m, 2H, Ar), 6.84–6.82 (m, 2H, Ar), 5.40 (d, 1H, *J*<sub>1,2</sub> = 1.8 Hz, H-1), 5.21 (br s, 1H, H-1'), 5.16 (br s, 1H, H-1'''), 5.12 (d, 1H, *J*<sub>1'',2''</sub> = 3.1 Hz, H-1''), 4.16–4.09 (m, 2H, H-5'', H-3'), 4.06 (dd, 1H, *J*<sub>2,3</sub> = 3.3 Hz, *J*<sub>3,4</sub> = 9.6 Hz, H-3), 3.99–3.80 (m, 5H, H-3'', H-5', H-5''', H-6''' x 2), 3.79 (s, 3H, OCH<sub>3</sub>), 3.75–3.68 (m, 5H, H-2, H-2''', H-5, CH<sub>2</sub>O x 2), 3.64–3.59 (m, 4H, H-2', H-2'', H-3''', H-4'), 3.56–3.54 (m, 1H, H-4'''), 3.54 (s, 3H, OCH<sub>3</sub>), 3.52 (s, 3H, OCH<sub>3</sub>), 3.51 (s, 3H, OCH<sub>3</sub>), 3.45 (s, 3H, OCH<sub>3</sub>), 3.44–3.42 (m, 1H, H-4), 3.24–3.20 (m, 1H, H-4''), 1.66–1.59 (m, 2H, CH<sub>2</sub>CH<sub>3</sub>), 1.33 (d, 3H, *J*<sub>5'',6''</sub> = 6.5 Hz, H-6''), 1.26 (d, 3H, *J*<sub>5',6'</sub> = 6.2 Hz, H-6'), 1.25 (d, 3H, *J*<sub>5,6</sub> = 6.2 Hz, H-6), 0.95 (t, 3H, *J* = 7.5 Hz, CH<sub>2</sub>CH<sub>3</sub>); <sup>13</sup>C NMR (125.7 MHz, CDCl<sub>3</sub>,  $\delta$ <sub>C</sub>) 154.9 (Ar), 150.4 (Ar), 117.5 (Ar x 2), 114.6 (Ar x 2), 101.6, 100.1, 98.9, 95.6, 82.4, 82.1, 80.7, 80.5, 80.3, 79.8, 79.6, 75.8 (CH<sub>2</sub>O), 73.2, 71.4, 71.1, 70.9, 69.1, 68.7, 67.4, 66.5, 61.2, 61.0, 59.0 (OCH<sub>3</sub>), 58.9 (OCH<sub>3</sub>), 58.2 (OCH<sub>3</sub>), 55.7 (OCH<sub>3</sub>), 55.7 (OCH<sub>3</sub>), 23.5 (CH<sub>2</sub>CH<sub>3</sub>), 18.0, 17.8, 16.6, 10.8 (CH<sub>2</sub>CH<sub>3</sub>). HRMS (ESI) Calcd. for (M + Na)<sup>+</sup> C<sub>38</sub>H<sub>62</sub>NaO<sub>19</sub>: 845.3778. Found 845.3776.

***p*-Methoxyphenyl 2-*O*-methyl- $\alpha$ -D-mannopyranosyl-(1 $\rightarrow$ 3)-2-*O*-methyl- $\alpha$ -L-fucopyranosyl-(1 $\rightarrow$ 3)-2-*O*-methyl- $\alpha$ -L-rhamnopyranosyl-(1 $\rightarrow$ 3)-2,4-di-*O*-methyl- $\alpha$ -L-rhamnopyranoside (20)**

To a solution of **S40** (20 mg, 0.016 mmol) in 1:1 CH<sub>3</sub>OH–CH<sub>2</sub>Cl<sub>2</sub> (15 mL), 1M NaOCH<sub>3</sub> (0.15 mL) was added and the reaction mixture was stirred for 3 h at rt. It was then neutralized with Amberlite IR-120 H<sup>+</sup> resin, filtered and concentrated. The resulting residue was dissolved in DMF (2 mL), CH<sub>3</sub>I (0.1 mL) and NaH (60% in mineral oil, 0.7 mg, 0.027 mmol) were added at 0 °C. The reaction mixture was stirred for 1 h at rt the addition of chilled water (5 mL) and CH<sub>2</sub>Cl<sub>2</sub> (10 mL). The organic layer was washed with water (2 x 10 mL), and brine (10 mL) and then separated and concentrated. The resulting residue was purified by chromatography (2:1 hexane–EtOAc) to give syrup. To the solution of the syrup in AcOH (5 mL), (Ph<sub>3</sub>P)<sub>4</sub>Pd (2 mg, 10% w/w) was added and the reaction mixture was stirred overnight at rt before it was filtered. The filtrate was diluted with water (10 mL) and CH<sub>2</sub>Cl<sub>2</sub> (20 mL), and then the organic layer was washed with water (2 x 10 mL) and brine (10 mL) before it was dried (NaSO<sub>4</sub>) and concentrated. The resulting crude product was purified by chromatography (2:1 hexane–EtOAc) to give a colorless oil. To the solution of the oil in 1:1 CH<sub>3</sub>OH–CH<sub>2</sub>Cl<sub>2</sub> (15 mL), Pd–C (2 mg) was added and the reaction mixture was stirred for two days under a hydrogen atmosphere. It was then filtered, concentrated and the resulting residue was purified by chromatography (20:1 CH<sub>2</sub>Cl<sub>2</sub>–CH<sub>3</sub>OH) to give **20** (9 mg, 71%) as an amorphous solid: *R*<sub>f</sub> 0.50 (10:0.75 CH<sub>2</sub>Cl<sub>2</sub>–CH<sub>3</sub>OH); [ $\alpha$ ]<sub>D</sub> –19.3 (*c* 0.8, CHCl<sub>3</sub>); <sup>1</sup>H NMR (500 MHz, CDCl<sub>3</sub>,  $\delta$ <sub>H</sub>) 7.02–6.98 (m, 2H, Ar-2,6), 6.85–6.82 (m, 2H, Ar-3,5), 5.40 (d, 1H, *J*<sub>1,2</sub> = 1.8 Hz, H-1), 5.21 (br s, 1H, H-1'), 5.15 (br s, 1H, H-1''), 5.10 (d, 1H, *J*<sub>1'',2''</sub> = 3.2 Hz, H-1''), 4.17 (dq, 1H, *J*<sub>4'',5''</sub> = 2.6 Hz, *J*<sub>5'',6''</sub> = 6.5 Hz, H-5''), 4.12–4.08 (m, 2H, H-3, H-3'), 3.97–3.80 (m, 7H, H-2, H-3'', H-5, H-5', H-5'', H-6'' x 2), 3.79 (s, 3H, OCH<sub>3</sub>), 3.72–3.70 (m, 3H, H-2', H-2'', H-2'''), 3.69–3.65 (m, 2H, H-3''', H-4''), 3.64–3.59 (m, 2H, H-4', H-4'''), 3.56 (s, 3H, OCH<sub>3</sub>), 3.54 (s, 3H, OCH<sub>3</sub>), 3.53 (s, 3H, OCH<sub>3</sub>), 3.50 (s, 3H, OCH<sub>3</sub>), 3.48 (s, 3H, OCH<sub>3</sub>), 3.24 (app t, 1H, *J*<sub>3,4</sub> = *J*<sub>4,5</sub> = 9.5 Hz, H-4), 1.36 (d, 3H, *J*<sub>5'',6''</sub> = 6.5 Hz, H-6''), 1.29–1.26 (m, 6H, H-6, H-6'); <sup>13</sup>C NMR (125.7 MHz, CDCl<sub>3</sub>,  $\delta$ <sub>C</sub>) 154.9 (Ar), 150.4 (Ar), 117.5 (Ar x 2), 114.6 (Ar x 2), 100.7, 99.3, 97.8, 95.6, 83.1, 82.3, 80.6, 80.4, 80.2,

78.9, 78.5(3), 78.4(4), 72.5, 71.7, 71.6, 71.5, 69.2, 69.0, 68.7, 66.5, 62.6, 61.1 (OCH<sub>3</sub>), 59.9 (OCH<sub>3</sub>), 59.0 (OCH<sub>3</sub>), 58.8 (OCH<sub>3</sub>), 58.6 (OCH<sub>3</sub>), 55.7 (OCH<sub>3</sub>), 17.8(6), 17.8(5), 16.3. HRMS (ESI) Calcd. for (M + Na)<sup>+</sup> C<sub>36</sub>H<sub>58</sub>NaO<sub>19</sub>: 817.3465. Found 817.3462.

***p*-Methoxyphenyl 2-*O*-methyl- $\alpha$ -D-mannopyranosyl-(1 $\rightarrow$ 3)-2-*O*-methyl-4-*O*-propyl- $\alpha$ -L-fucopyranosyl-(1 $\rightarrow$ 3)-2-*O*-methyl- $\alpha$ -L-rhamnopyranosyl-(1 $\rightarrow$ 3)-2,4-di-*O*-methyl- $\alpha$ -L-rhamnopyranoside (21)**

To a solution of **S40** (15 mg, 0.012 mmol) in 1:1 CH<sub>3</sub>OH–CH<sub>2</sub>Cl<sub>2</sub> (15 mL), 1M NaOCH<sub>3</sub> (0.15 mL) was added and the reaction mixture was stirred for 3 h at rt. It was then neutralized with Amberlite IR-120 H<sup>+</sup> resin, filtered and concentrated. The resulting residue was dissolved in DMF (1 mL), CH<sub>3</sub>I (0.1 mL) and NaH (60% in mineral oil, 0.5 mg, 0.022 mmol) were added at 0 °C. The reaction mixture was stirred for 1 h at rt before the addition of chilled water (5 mL), and CH<sub>2</sub>Cl<sub>2</sub> (10 mL). The organic layer was washed with water (2 x 10 mL) and brine (10 mL) and then separated, concentrated and the resulting crude product was purified by chromatography (2:1 hexane–EtOAc) to give a syrup. To the solution of the syrup in 1:1 CH<sub>3</sub>OH–CH<sub>2</sub>Cl<sub>2</sub> (10 mL), Pd–C (4 mg) was added and the reaction mixture was stirred overnight under a hydrogen atmosphere. The solution was then filtered, concentrated and the resulting residue was purified by chromatography (20:1 CH<sub>2</sub>Cl<sub>2</sub>–CH<sub>3</sub>OH) to give **21** (7.6 mg, 76%) as a thick syrup: *R*<sub>f</sub> 0.45 (20:1 CH<sub>2</sub>Cl<sub>2</sub>–CH<sub>3</sub>OH); [ $\alpha$ ]<sub>D</sub> –38.1 (*c* 0.4, CHCl<sub>3</sub>); <sup>1</sup>H NMR (500 MHz, CDCl<sub>3</sub>,  $\delta$ <sub>H</sub>) 6.99–6.96 (m, 2H, Ar-2,6), 6.83–6.80 (m, 2H, Ar-3,5), 5.39 (d, 1H, *J*<sub>1,2</sub> = 1.8 Hz, H-1), 5.28 (br s, 1H, H-1'), 5.16 (br s, 1H, H-1''), 5.09 (d, 1H, *J*<sub>1'',2''</sub> = 3.3 Hz, H-1''), 4.16–4.17 (m, 2H, H-3', H-5''), 4.08 (dd, 1H, *J*<sub>2,3</sub> = 3.3 Hz, *J*<sub>3,4</sub> = 9.6 Hz, H-3), 3.89–3.85 (m, 3H, H-3'', H-6''' x 2), 3.82–3.77 (m, 2H, H-5', H-5'''), 3.76 (s, 3H, OCH<sub>3</sub>), 3.74–3.67 (m, 5H, CH<sub>2</sub>O x 2, H-2, H-2', H-5), 3.65–3.62 (m, 2H, H-2'', H-2'''), 3.56–3.55 (m, 1H, H-3'''), 3.53 (s, 3H, OCH<sub>3</sub>), 3.51 (s, 3H, OCH<sub>3</sub>), 3.50 (s, 3H, OCH<sub>3</sub>), 3.49–3.47 (m, 2H, H-4', H-4'''), 3.46 (s, 3H, OCH<sub>3</sub>), 3.43–3.42 (m, 1H, H-4''), 3.21 (app t, 1H, *J*<sub>3,4</sub> = *J*<sub>4,5</sub> = 9.6 Hz, H-4), 1.65–1.58 (m, 2H, CH<sub>2</sub>CH<sub>3</sub>), 1.35 (d, 3H, *J*<sub>5,6</sub> = 6.2 Hz, H-6),

1.26 (d, 3H,  $J_{5',6'} = 6.2$  Hz, H-6'), 1.21 (d, 1H,  $J_{5'',6''} = 6.5$  Hz, H-6''), 0.94 (t, 3H,  $J = 7.7$  Hz, CH<sub>2</sub>CH<sub>3</sub>); <sup>13</sup>C NMR (125.7 MHz, CDCl<sub>3</sub>, δ<sub>C</sub>) 154.9 (Ar), 150.4 (Ar), 117.5 (Ar x 2), 114.6 (Ar x 2), 100.3, 99.3, 97.8, 95.6, 82.9, 82.2, 80.6, 80.5, 80.3, 80.2, 79.3, 75.9 (CH<sub>2</sub>O), 75.8, 72.6, 71.5, 71.4, 69.0, 68.8, 68.7, 67.6, 62.5, 61.1, 59.1 (OCH<sub>3</sub>), 58.9 (OCH<sub>3</sub>), 58.7 (OCH<sub>3</sub>), 58.5 (OCH<sub>3</sub>), 55.7 (OCH<sub>3</sub> x 2), 23.5 (CH<sub>2</sub>CH<sub>3</sub>), 17.9, 17.8, 16.5, 10.8 (CH<sub>2</sub>CH<sub>3</sub>). HRMS (ESI) Calcd. for (M + Na)<sup>+</sup> C<sub>39</sub>H<sub>64</sub>NaO<sub>19</sub>: 859.3934. Found 859.3925.

***p*-Methoxyphenyl 4-*O*-methyl- $\alpha$ -D-mannopyranosyl-(1 $\rightarrow$ 3)-2-*O*-methyl- $\alpha$ -L-fucopyranosyl-(1 $\rightarrow$ 3)-2-*O*-methyl- $\alpha$ -L-rhamnopyranosyl-(1 $\rightarrow$ 3)-2,4-di-*O*-methyl- $\alpha$ -L-rhamnopyranoside (22)**

To a solution of **S41** (20 mg, 0.02 mmol) in 1:1 CH<sub>3</sub>OH–CH<sub>2</sub>Cl<sub>2</sub> (15 mL), 1M NaOCH<sub>3</sub> (0.15 mL) was added and the reaction mixture was stirred for 4 h at rt. The reaction mixture was then neutralized with Amberlite IR-120 H<sup>+</sup> resin, filtered and concentrated. The resulting crude product was purified by chromatography (1:1 hexane–EtOAc) to give a syrup. To the solution of this syrup in AcOH (3 mL), (Ph<sub>3</sub>P)<sub>4</sub>Pd (4 mg, 20 % w/w) was added and the reaction mixture was stirred overnight and then filtered. The filtrate was diluted with water (10 mL), and CH<sub>2</sub>Cl<sub>2</sub> (20 mL) and then washed with water (2 x 10 mL) and brine (10 mL). The organic layer was separated, dried (NaSO<sub>4</sub>), concentrated and the resulting oil was dissolved in 1:1 CH<sub>3</sub>OH–CH<sub>2</sub>Cl<sub>2</sub> (20 mL). To this solution, Pd–C (4 mg, 20% w/w) was added and the reaction mixture was stirred overnight under a hydrogen atmosphere before it was filtered and concentrated. The resulting crude product was purified by chromatography (10:0.75, CH<sub>2</sub>Cl<sub>2</sub>–CH<sub>3</sub>OH) to give **22** (11.3 mg, 71%) as a thick syrup:  $R_f$  0.50 (10:0.75, CH<sub>2</sub>Cl<sub>2</sub>–CH<sub>3</sub>OH);  $[\alpha]_D -41.7$  ( $c$  0.7, CHCl<sub>3</sub>); <sup>1</sup>H NMR (500 MHz, CDCl<sub>3</sub>, δ<sub>H</sub>) 7.01–6.98 (m, 2H, Ar-2,6), 6.85–6.81 (m, 2H, Ar-3,5), 5.40 (d, 1H,  $J_{1,2} = 1.7$  Hz, H-1), 5.19–5.18 (m, 2H, H-1', H-1'''), 5.11 (d, 1H,  $J_{1'',2''} = 3.3$  Hz, H-1''), 4.20–4.16 (m, 1H, H-5''), 4.11–4.08 (m, 2H, H-3', H-3), 4.02–4.01 (m, 1H, H-3''), 3.95–3.85 (m, 4H, H-5, H-5', H-6''' x 2), 3.81–3.79 (m, 3H, H-2, H-2''', H-5'''), 3.78 (s, 3H, OCH<sub>3</sub>), 3.72–3.68 (m, 2H, H-2', H-2''), 3.67–3.62 (m, 3H, H-3''', H-4', H-4''), 3.59 (s, 3H, OCH<sub>3</sub>), 3.55 (s, 3H, OCH<sub>3</sub>), 3.52 (s, 6H, OCH<sub>3</sub> x 2), 3.47 (s, 3H, OCH<sub>3</sub>), 3.46–3.43 (m, 1H, H-4'''), 3.23 (app



t, 1H,  $J_{3,4} = J_{4,5} = 9.6$  Hz, H-4), 1.37 (d, 3H,  $J_{5'',6''} = 6.4$  Hz, H-6''), 1.28–1.26 (m, 6H, H-6, H-6');  $^{13}\text{C}$  NMR (125.7 MHz,  $\text{CDCl}_3$ ,  $\delta_{\text{C}}$ ) 154.9 (Ar), 150.4 (Ar), 117.5 (Ar x 2), 114.6 (Ar x 2), 101.0, 100.1, 98.9, 95.6, 82.8, 82.2, 80.5, 80.3, 79.2, 78.8, 78.7, 78.4, 78.2, 71.3, 71.1, 69.0, 68.7, 68.6, 66.5, 66.3, 62.0, 61.1 ( $\text{OCH}_3$ ), 60.8 ( $\text{OCH}_3$ ), 59.5 ( $\text{OCH}_3$ ), 59.0 ( $\text{OCH}_3$ ), 58.2 ( $\text{OCH}_3$ ), 55.7 ( $\text{OCH}_3$ ), 18.0, 17.8, 16.3. HRMS (ESI) Calcd. for  $(\text{M} + \text{Na})^+ \text{C}_{36}\text{H}_{58}\text{NaO}_{19}$ : 817.3465. Found 817.3459.

***p*-Methoxyphenyl      2,4-di-*O*-methyl- $\alpha$ -D-mannopyranosyl-(1 $\rightarrow$ 3)-2-*O*-methyl- $\alpha$ -L-fucopyranosyl-(1 $\rightarrow$ 3)-2-*O*-methyl- $\alpha$ -L-rhamnopyranosyl-(1 $\rightarrow$ 3)-2,4-di-*O*-methyl- $\alpha$ -L-rhamnopyranoside (23)**

To a solution of **S41** (15 mg, 0.012 mmol) in 1:1  $\text{CH}_3\text{OH}-\text{CH}_2\text{Cl}_2$  (15 mL) was added 1M  $\text{NaOCH}_3$  (0.15 mL) and the reaction mixture was stirred for 4 h at rt. The reaction mixture was then neutralized with Amberlite IR-120  $\text{H}^+$  resin, filtered and concentrated. The resulting crude product was dissolved in DMF (4 mL),  $\text{CH}_3\text{I}$  (0.1 mL) and NaH (60% in mineral oil, 6 mg) were added at 0 °C. The reaction mixture was stirred for 1 h at rt before the addition of water (8 mL), and  $\text{CH}_2\text{Cl}_2$  (10 mL). The organic layer was washed with water (2 x 10 mL) and brine (10 mL) before being concentrated. The resulting residue was purified by chromatography (2:1 hexane–EtOAc) to give a syrup. This syrup was dissolved in AcOH (3 mL),  $(\text{Ph}_3\text{P})_4\text{Pd}$  (3 mg, 20% w/w) was added and the reaction mixture was stirred overnight. The reaction mixture was then filtered, and the filtrate was diluted with water (10 mL), and  $\text{CH}_2\text{Cl}_2$  (20 mL). The organic layer was washed with water (2 x 10 mL) and brine (10 mL), and then separated, dried ( $\text{NaSO}_4$ ), and concentrated to give an oil that was dissolved in 1:1  $\text{CH}_3\text{OH}-\text{CH}_2\text{Cl}_2$  (20 mL). To this solution, Pd–C (4 mg) was added and the reaction mixture was stirred overnight under a hydrogen atmosphere. The reaction mixture was then filtered, concentrated and the resulting crude product was purified by chromatography (20:1  $\text{CH}_2\text{Cl}_2-\text{CH}_3\text{OH}$ ) to give **23** (7.2 mg, 74%) as a thick syrup:  $R_f$  0.39 (20:1  $\text{CH}_2\text{Cl}_2-\text{CH}_3\text{OH}$ );  $[\alpha]_{\text{D}} -39.2$  ( $c$  0.5,  $\text{CHCl}_3$ );  $^1\text{H}$  NMR (500 MHz,  $\text{CDCl}_3$ ,  $\delta_{\text{H}}$ ) 6.99–6.96 (m, 2H, Ar-2,6), 6.83–6.80 (m, 2H, Ar-3,5), 5.40 (d, 1H,  $J_{1,2} = 1.8$  Hz, H-1), 5.21 (br s, 1H, H-1'), 5.18 (br s, 1H, H-1'''), 5.09 (d, 1H,  $J_{1'',2''} = 3.3$  Hz, H-1''), 4.15–4.07 (dq, 1H,  $J_{4'',5''} = 2.8$

Hz,  $J_{5'',6''} = 6.4$  Hz, H-5''), 4.11 (dd, 1H,  $J_{2',3'} = 3.0$  Hz,  $J_{3',4'} = 9.5$  Hz, H-3'), 4.07 (dd, 1H,  $J_{2,3} = 3.1$  Hz,  $J_{3,4} = 9.5$  Hz, H-3), 3.91–3.86 (m, 4H, H-3'', H-5', H-6''' x 2), 3.80–3.76 (m, 3H, H-2, H-5, H-5'''), 3.78 (s, 3H, OCH<sub>3</sub>), 3.74–3.69 (m, 3H, H-2', H-2'', H-2'''), 3.66–3.62 (m, 3H, H-3''', H-4', H-4''), 3.58 (s, 3H, OCH<sub>3</sub>), 3.56 (s, 3H, OCH<sub>3</sub>), 3.53 (s, 3H, OCH<sub>3</sub>), 3.52 (s, 3H, OCH<sub>3</sub>), 3.51 (s, 3H, OCH<sub>3</sub>), 3.48 (s, 3H, OCH<sub>3</sub>), 3.30–3.23 (m, 2H, H-4, H-4'''), 2.70 (br s, 1H, OH), 2.51 (d, 1H,  $J = 8.5$  Hz, OH), 1.72 (br s, 2H, OH x 2), 1.36 (d, 3H,  $J_{5,6} = 6.2$  Hz, H-6), 1.28 (d, 3H,  $J_{5',6'} = 6.2$  Hz, H-6'), 1.26 (d, 3H,  $J_{5'',6''} = 6.4$  Hz, H-6''); <sup>13</sup>C NMR (125.7 MHz, CDCl<sub>3</sub>, δ<sub>C</sub>) 154.9 (Ar), 150.4 (Ar), 117.5 (Ar x 2), 114.6 (Ar x 2), 100.7, 99.3, 97.7, 95.6, 83.2, 82.3, 80.6(2), 80.6(0), 80.3, 78.9, 78.5, 78.4, 78.3, 72.3, 71.7, 71.6, 71.4, 69.0, 68.7, 66.4, 62.4, 61.1 (OCH<sub>3</sub>), 60.8 (OCH<sub>3</sub>), 60.0 (OCH<sub>3</sub>), 59.0 (OCH<sub>3</sub>), 58.8 (OCH<sub>3</sub>), 58.6 (OCH<sub>3</sub>), 55.7 (OCH<sub>3</sub>), 17.8(6), 17.8(4), 16.3. HRMS (ESI) Calcd. for (M + Na)<sup>+</sup> C<sub>37</sub>H<sub>60</sub>NaO<sub>19</sub>: 831.3621. Found 831.3613.

***p*-Methoxyphenyl      2,4-di-*O*-methyl- $\alpha$ -D-mannopyranosyl-(1→3)-2-*O*-methyl-4-*O*-isopropyl- $\alpha$ -L-fucopyranosyl-(1→3)-2-*O*-methyl- $\alpha$ -L-rhamnopyranosyl-(1→3)-2,4-di-*O*-methyl- $\alpha$ -L-rhamnopyranoside (24)**

To a solution of **S41** (15 mg, 0.012 mmol) in 1:1 CH<sub>3</sub>OH–CH<sub>2</sub>Cl<sub>2</sub> (15 mL), 1M NaOCH<sub>3</sub> (0.15 mL) was added and the reaction mixture was stirred for 4 h at rt. The reaction mixture was then neutralized with Amberlite IR-120 H<sup>+</sup> resin, filtered and concentrated. The resulting crude product was dissolved in DMF (4 mL), CH<sub>3</sub>I (0.1 mL) and NaH (60% in mineral oil, 4 mg) were added at 0 °C. The reaction mixture was stirred for 1 h at rt before the addition of water (8 mL). The mixture was diluted with CH<sub>2</sub>Cl<sub>2</sub> (15 mL), washed with water (2 x 10 mL) and brine (20 mL). The organic layer was separated, concentrated and the resulting residue was purified by chromatography (2:1 hexane–EtOAc) to give a syrup. To the solution of this syrup in 1:1 CH<sub>3</sub>OH–CH<sub>2</sub>Cl<sub>2</sub> (20 mL), Pd–C (4 mg) was added and the reaction mixture was stirred overnight under a hydrogen atmosphere. The reaction mixture was then filtered, concentrated and the resulting crude product was purified by chromatography (10:0.75, CH<sub>2</sub>Cl<sub>2</sub>–CH<sub>3</sub>OH) to give **24** (7.3 mg,

71%) as a thick syrup:  $R_f$  0.44 (10:0.75,  $\text{CH}_2\text{Cl}_2$ - $\text{CH}_3\text{OH}$ );  $[\alpha]_D -27.6$  ( $c$  0.7,  $\text{CHCl}_3$ );  $^1\text{H NMR}$  (500 MHz,  $\text{CDCl}_3$ ,  $\delta_{\text{H}}$ ) 7.01–6.98 (m, 2H, Ar-2,6), 6.85–6.81 (m, 2H, Ar-3,5), 5.40 (d, 1H,  $J_{1,2} = 1.7$  Hz, H-1), 5.20 (br s, 1H, H-1'), 5.18 (br s, 1H, H-1''), 5.08 (d, 1H,  $J_{1'',2''} = 3.2$  Hz, H-1''), 4.21–4.06 (m, 3H, H-3, H-3', H-5''), 3.91–3.86 (m, 3H, H-3'', H-5', H-6''' x 2), 3.80–3.76 (m, 3H, H-2, H-5, H-5'''), 3.78 (s, 3H,  $\text{OCH}_3$ ), 3.74–3.71 (m, 4H, H-2', H-2'',  $\text{CH}_2\text{O}$ ), 3.70–3.62 (m, 3H, H-2''', H-3''', H-4'), 3.57 (s, 3H,  $\text{OCH}_3$ ), 3.55 (s, 3H,  $\text{OCH}_3$ ), 3.53 (s, 3H,  $\text{OCH}_3$ ), 3.52 (s, 3H,  $\text{OCH}_3$ ), 3.51 (s, 3H,  $\text{OCH}_3$ ), 3.48 (s, 3H,  $\text{OCH}_3$ ), 3.40–3.38 (m, 1H, H-4''), 3.30 (app t, 1H,  $J_{3''',4'''} = J_{4''',5'''} = 9.8$  Hz, H-4'''), 3.21 (app t, 1H,  $J_{3,4} = J_{4,5} = 9.6$  Hz, H-4), 1.61 (q, 1H,  $J = 7.5$  Hz,  $\text{CH}_2\text{CH}_2\text{O}$ ), 1.35 (d, 3H,  $J_{5',6'} = 6.2$  Hz, H-6'), 1.26 (d, 3H,  $J_{5,6} = 6.2$  Hz, H-6), 1.20 (d, 3H,  $J_{5'',6''} = 6.5$  Hz, H-6''), 0.94 (t, 1H,  $J = 7.5$  Hz,  $\text{CH}_3\text{CH}_2$ );  $^{13}\text{C NMR}$  (125.7 MHz,  $\text{CDCl}_3$ ,  $\delta_{\text{C}}$ ) 154.9 (Ar), 150.4 (Ar), 117.5 (Ar x 2), 114.6 (Ar x 2), 100.4, 99.4, 97.5, 95.6, 83.1, 82.2, 80.6(0), 80.5(6), 80.5, 80.4, 80.3, 79.3, 78.3, 75.8 ( $\text{CH}_2\text{O}$ ), 72.7, 72.1, 71.6, 69.4, 69.0, 68.7, 67.7, 62.5, 61.1 ( $\text{OCH}_3$ ), 60.9 ( $\text{OCH}_3$ ), 59.3 ( $\text{OCH}_3$ ), 58.9 ( $\text{OCH}_3$ ), 58.6(1) ( $\text{OCH}_3$ ), 58.5(8) ( $\text{OCH}_3$ ), 55.7 ( $\text{OCH}_3$ ), 23.52 ( $\text{CH}_2\text{CH}_3$ ), 17.8(6), 17.8(4), 16.3, 10.8 ( $\text{CH}_3\text{CH}_2$ ). HRMS (ESI) Calcd. for (M + Na)  $\text{C}_{40}\text{H}_{66}\text{NaO}_{19}$ : 873.4091. Found 873.4083.

#### ***p*-Tolyl 4-*O*-allyl-3-*O*-*p*-methoxybenzyl-2-*O*-methyl-1-thio- $\beta$ -L-fucopyranoside (25)**

To a solution of compound **S24** (1 g, 2.47 mmol) and AllBr (0.2 mL, 2.29 mmol) in DMF (10 mL) at 0 °C was added NaH (60% in mineral oil, 95 mg, 3.95 mmol). The reaction mixture was stirred for 2 h at rt before the addition of chilled water (30 mL). The solution was concentrated, diluted with  $\text{CH}_2\text{Cl}_2$  (50 mL) and washed with water (2 x 50 mL). The organic layer was dried ( $\text{Na}_2\text{SO}_4$ ), filtered, concentrated and the resulting residue was purified by chromatography (5:1 hexane–EtOAc) to give **25** (0.94 g, 86%) as a colorless oil:  $R_f$  0.61 (5:1 hexane–EtOAc);  $[\alpha]_D -14.7$  ( $c$  1.0,  $\text{CHCl}_3$ );  $^1\text{H NMR}$  (400 MHz,  $\text{CDCl}_3$ ,  $\delta_{\text{H}}$ ) 7.49–7.46 (m, 2H, Ar), 7.31–7.27 (m, 2H, Ar), 7.09–7.07 (m, 2H, Ar), 6.90–6.87 (m, 2H, Ar), 5.98–5.88 (m, 1H,  $\text{CH}_2=\text{CH}$ ), 5.28–5.27 (m, 1H,  $\text{CH}_2=\text{CH}$ ), 5.17–5.14 (m, 1H,  $\text{CH}_2=\text{CH}$ ), 4.66, 4.62 (ABq, 2H,  $J = 11.5$  Hz,  $\text{ArCH}_2$ ), 4.43–4.37 (m, 2H,  $\text{CH}_2\text{O}$ , H-1), 4.13–4.08 (m, 1H,  $\text{CH}_2\text{O}$ ), 3.81 (s, 3H,  $\text{OCH}_3$ ), 3.60 (s, 3H,  $\text{OCH}_3$ ),

3.52–3.45 (m, 3H, H-2, H-4, H-5), 3.41 (dd, 1H,  $J_{2,3} = 9.7$  Hz,  $J_{3,4} = 3.1$  Hz, H-3), 2.32 (s, 3H, ArCH<sub>3</sub>), 1.28 (d, 3H,  $J_{5,6} = 6.4$  Hz, H-6); <sup>13</sup>C NMR (125.7 MHz, CDCl<sub>3</sub>, δ<sub>C</sub>) 159.2 (=CH), 137.1 (Ar), 135.6 (CH<sub>2</sub>=), 132.2 (Ar x 2), 130.5 (Ar), 129.4 (Ar x 2), 129.2 (Ar x 2), 116.2 (Ar x 2), 113.8 (Ar x 2), 87.9, 83.8, 79.0, 76.4 (ArCH<sub>2</sub>), 74.5 (CH<sub>2</sub>O), 73.9, 72.4, 61.1 (OCH<sub>3</sub>), 55.3 (OCH<sub>3</sub>), 21.1 (ArCH<sub>3</sub>), 17.2 (C-6). HRMS (ESI) Calcd. for (M + Na)<sup>+</sup> C<sub>25</sub>H<sub>32</sub>NaO<sub>5</sub>S: 467.1863. Found 467.1855.

***p*-Methoxyphenyl 4-*O*-benzyl-2-*O*-methyl- $\alpha$ -L-rhamnopyranosyl-(1→3)-2,4-di-*O*-methyl- $\alpha$ -L-rhamnopyranoside (26)**

To a solution of **S28** (0.5 g, 0.72 mmol) in 1:1 CH<sub>3</sub>OH–CH<sub>2</sub>Cl<sub>2</sub> (30 mL), 1M NaOCH<sub>3</sub> (0.5 mL) was added. The reaction mixture was stirred for 1 h at rt and then neutralized with Amberlite IR-120 H<sup>+</sup> resin, filtered and concentrated. The resulting residue was dissolved in DMF (5 mL) and CH<sub>3</sub>I (0.1 mL, 0.86 mmol) was added. To this solution, cooled to 0 °C, NaH (60% in mineral oil, 27.50 mg, 1.16 mmol) was added and then the reaction mixture was stirred for additional 1 h at rt. After 1 h, chilled water (10 mL) was added and the solution was diluted with CH<sub>2</sub>Cl<sub>2</sub> (30 mL), washed with water (2 x 20 mL), 1M HCl soln (2 x 20 mL) and brine (20 mL). The organic layer was separated, dried (Na<sub>2</sub>SO<sub>4</sub>), filtered, concentrated and the resulting purified by chromatography (4:1 hexane–EtOAc) to give a syrup. This syrup was dissolved in CH<sub>2</sub>Cl<sub>2</sub> (20 mL) and TFA (1 mL, 5% v/v) was added dropwise over 2 min at 0 °C. The reaction mixture was stirred for additional 30 min at 0 °C before the addition of Et<sub>3</sub>N (3 mL) and concentration. The resulting crude product was purified by chromatography (2:1 hexane–EtOAc) to give **26** (0.32 g, 80%) as a colorless oil: *R*<sub>f</sub> 0.40 (2:1 hexane–EtOAc); [ $\alpha$ ]<sub>D</sub> –46.9 (*c* 0.6, CHCl<sub>3</sub>); <sup>1</sup>H NMR (500 MHz, CDCl<sub>3</sub>, δ<sub>H</sub>) 7.40–7.34 (m, 5H, Ar), 7.01–6.97 (m, 2H, Ar-2,6), 6.84–6.81 (m, 2H, Ar-3,5), 5.38 (d, 1H,  $J_{1,2} = 1.8$  Hz, H-1), 5.22 (d, 1H,  $J_{1',2'} = 1.7$  Hz, H-1'), 4.92, 4.70 (ABq, 2H,  $J = 11.0$  Hz, ArCH<sub>2</sub>), 4.13 (dd, 1H,  $J_{2,3} = 3.5$  Hz,  $J_{3,4} = 9.5$  Hz, H-3), 4.02 (dd, 1H,  $J_{2',3'} = 3.3$  Hz,  $J_{3',4'} = 9.6$  Hz, H-3'), 3.87 (dq, 1H,  $J_{4',5'} = 9.6$  Hz,  $J_{5',6'} = 6.5$  Hz, H-5'), 3.77 (s, 3H, OCH<sub>3</sub>), 3.70 (dq, 1H,  $J_{4,5} = 9.5$  Hz,  $J_{5,6} = 6.5$  Hz, H-5), 3.67 (dd, 1H,  $J_{1',2'} = 1.7$  Hz,  $J_{2',3'} = 3.3$  Hz, H-2'), 3.62 (dd,

1H,  $J_{1,2} = 1.8$  Hz,  $J_{2,3} = 3.5$  Hz, H-2), 3.55 (s, 3H, OCH<sub>3</sub>), 3.53 (s, 3H, OCH<sub>3</sub>), 3.51 (s, 3H, OCH<sub>3</sub>), 3.31 (app t, 1H,  $J_{3',4'} = J_{4',5'} = 9.6$  Hz, H-4'), 3.25 (app t, 1H,  $J_{3,4} = J_{4,5} = 9.5$  Hz, H-4), 1.35 (d, 1H,  $J_{5',6'} = 6.5$  Hz, H-6'), 1.27 (d, 1H,  $J_{5,6} = 6.5$  Hz, H-6); <sup>13</sup>C NMR (125.7 MHz, CDCl<sub>3</sub>, δ<sub>C</sub>) 154.9 (Ar), 150.4 (Ar), 138.5 (Ar), 128.4 (Ar x 2), 128.0 (Ar x 2), 127.8 (Ar), 117.5 (Ar x 2), 114.6 (Ar x 2), 98.3, 95.9, 82.6, 82.1, 81.2, 80.3, 78.3, 75.1 (ArCH<sub>2</sub>), 71.5, 68.8, 67.8, 61.0 (OCH<sub>3</sub>), 59.2 (OCH<sub>3</sub>), 58.7 (OCH<sub>3</sub>), 55.7 (OCH<sub>3</sub>), 18.1, 17.8. HRMS (ESI) Calcd. for (M + Na)<sup>+</sup> C<sub>29</sub>H<sub>40</sub>NaO<sub>10</sub>: 571.2514. Found 571.2509.

***p*-Methoxyphenyl      4-*O*-allyl-2-*O*-methyl- $\alpha$ -L-fucopyranosyl-(1→3)-4-*O*-benzyl-2-*O*-methyl- $\alpha$ -L-rhamnopyranosyl-(1→3)-2,4-di-*O*-methyl- $\alpha$ -L-rhamnopyranoside (27)**

Two solutions were prepared. Solution A was prepared by dissolving donor **25** (0.29 g, 0.65 mmol) in CH<sub>2</sub>Cl<sub>2</sub> (15 mL); containing crushed 4 Å molecular sieves (50 mg). Solution B was prepared by dissolving acceptor **26** (300 mg, 0.55 mmol) in CH<sub>2</sub>Cl<sub>2</sub> (15 mL); containing crushed 4 Å molecular sieves (100 mg). Both solutions were then stirred for 30 min at rt before solution B solution was cooled to -40 °C, NIS (144 mg, 0.64 mmol) and AgOTf (39 mg, 0.15 mmol) were added. Solution A was then added to solution B dropwise over 5 min while stirring. Then, the reaction mixture was stirred for additional 30 min at -40 °C before it was neutralized by the addition of Et<sub>3</sub>N (1 mL). The solution was filtered, concentrated and the resulting residue was dissolved in CH<sub>2</sub>Cl<sub>2</sub> (15 mL). To this solution, TFA (0.75 mL, 5% v/v) was added dropwise over 1 min at 0 °C and reaction mixture was then stirred for additional 30 min at 0 °C before it was neutralized by the addition of Et<sub>3</sub>N (2 mL). The solution was concentrated and the resulting crude product was purified by chromatography (1:1 hexanes–EtOAc) to give **27** (312 mg, 76%) as a colorless oil: *R*<sub>f</sub> 0.54 (1:1 hexanes–EtOAc); [α]<sub>D</sub> +25.0 (*c* 1.0, CHCl<sub>3</sub>); <sup>1</sup>H NMR (500 MHz, CDCl<sub>3</sub>, δ<sub>H</sub>) 7.37–7.23 (m, 5H, Ar), 7.00–6.96 (m, 2H, Ar-2,6), 6.83–6.80 (m, 2H, Ar-3,5), 6.01–5.93 (m, 1H, CH<sub>2</sub>=CH), 5.39 (d, 1H,  $J_{1,2} = 1.9$  Hz, H-1), 5.31–5.27 (m, 1H, CH<sub>2</sub>=CH), 5.23 (d, 1H,  $J_{1'',2''} = 3.4$  Hz, H-1''), 5.20–5.18 (m, 1H, CH<sub>2</sub>=CH), 5.16 (d, 1H,  $J_{1',2'} = 1.7$  Hz, H-1') 5.13, 4.58 (ABq, 2H,  $J = 11.5$  Hz, ArCH<sub>2</sub>), 4.35–4.31 (m, 1H, CH<sub>2</sub>O), 4.22–

4.17 (m, 2H,  $\text{CH}_2\text{O}$ , H-5''), 4.14–4.08 (m, 2H, H-4'', H-3''), 4.06 (dd, 1H,  $J_{2,3} = 3.3$  Hz,  $J_{3,4} = 9.6$  Hz, H-3), 4.02 (dd, 1H,  $J_{2',3'} = 3.2$  Hz,  $J_{3',4'} = 9.5$  Hz, H-3') 3.95 (dq, 1H,  $J_{4,5} = 9.4$  Hz,  $J_{5,6} = 6.2$  Hz, H-5), 3.76 (s, 3H,  $\text{OCH}_3$ ), 3.74–3.72 (m, 2H, H-2, H-2'), 3.68 (dq, 1H,  $J_{4',5'} = 9.5$  Hz,  $J_{5',6'} = 6.2$  Hz, H-5'), 3.59–3.58 (m, 1H, H-2''), 3.54 (s, 3H,  $\text{OCH}_3$ ), 3.50 (s, 3H,  $\text{OCH}_3$ ), 3.48 (s, 3H,  $\text{OCH}_3$ ), 3.49–3.46 (m, 1H, H-4'), 3.29 (s, 3H,  $\text{OCH}_3$ ), 3.21 (app t, 1H,  $J_{3,4} = J_{4,5} = 9.6$  Hz, H-4), 2.34 (d, 1H,  $J_{3'',\text{OH-}3''} = 2.5$  Hz, OH-3''), 1.30 (d, 3H,  $J_{5'',6''} = 6.5$  Hz, H-6''), 1.27 (d, 3H,  $J_{5',6'} = 6.2$  Hz, H-6'), 1.25 (d, 3H,  $J_{5,6} = 6.2$  Hz, H-6);  $^{13}\text{C}$  NMR (125.7 MHz,  $\text{CDCl}_3$ ,  $\delta_{\text{C}}$ ) 154.9 (Ar), 150.5 (Ar), 139.1 (Ar), 135.0 (=CH), 128.2 (Ar x 2), 127.4 (Ar x 2), 127.3 (Ar), 117.5 (Ar x 2), 117.4 ( $\text{CH}_2=\text{CH}$ ), 114.6 (Ar x 2), 99.1, 98.6, 95.5, 81.9, 80.7, 80.2, 80.1, 79.5, 79.4, 78.8, 74.9, 74.8, 70.2, 68.7(0), 68.6(8), 66.4, 61.2, 58.8 ( $\text{OCH}_3$ ), 58.1 ( $\text{OCH}_3$ ), 57.7(1) ( $\text{OCH}_3$ ), 55.6(5) ( $\text{OCH}_3$  x 2), 18.3, 17.9, 16.9. HRMS (ESI) Calcd. for  $(\text{M} + \text{Na})^+$   $\text{C}_{39}\text{H}_{56}\text{NaO}_{14}$ : 771.3562. Found 771.3560.

#### ***p*-Tolyl 2-*O*-benzoyl-3-*O*-benzyl-6-deoxy-4-*O*-methyl-1-thio- $\alpha$ -D-mannopyranoside (28)**

To a solution of compound **S34** (0.5 g, 1.54 mmol) in  $\text{Ac}_2\text{O}$  (10 mL) was added  $\text{H}_2\text{SO}_4$  (0.1 mL) after the solution was cooled to 0 °C. The reaction mixture was stirred for additional 2 h at 0 °C before the addition of satd. aq.  $\text{NaHCO}_3$  soln (10 mL), water (10 mL) and dilution with  $\text{CH}_2\text{Cl}_2$  (40 mL). The organic layer was separated, washed with satd. aq.  $\text{NaHCO}_3$  soln (2 x 30 mL), brine (40 mL), dried ( $\text{Na}_2\text{SO}_4$ ), filtered and concentrated. The resulting residue was dissolved in  $\text{CH}_2\text{Cl}_2$  (25 mL) and *p*-thiocresol (0.25 g, 2 mmol) was added. To this solution,  $\text{BF}_3 \cdot \text{Et}_2\text{O}$  (0.25 mL, 2 mmol) was added at 0 °C and the reaction mixture was stirred overnight at rt. Then, satd. aq.  $\text{NaHCO}_3$  soln (25 mL) was added and the mixture was diluted with  $\text{CH}_2\text{Cl}_2$  (30 mL). The organic layer was separated, washed with water (2 x 50 mL), brine (50 mL), dried ( $\text{Na}_2\text{SO}_4$ ), filtered and concentrated. The resulting residue was dissolved in 1:1  $\text{CH}_3\text{OH}-\text{CH}_2\text{Cl}_2$  (20 mL), 1M  $\text{NaOCH}_3$  (0.25 mL) was added and the reaction mixture was stirred for 2 h at rt. The solution was then neutralized with Amberlite IR-120  $\text{H}^+$  resin, filtered and concentrated. The resulting residue was dissolve in pyridine (5 mL) and  $\text{BzCl}$ , benzoyl chloride (0.21 mL, 2 mmol) was added at 0 °C. The reaction mixture was stirred for

additional 2 h at rt before the addition of water (20 mL) and dilution with CH<sub>2</sub>Cl<sub>2</sub> (40 mL). The organic layer washed with satd. aq. NaHCO<sub>3</sub> soln (2 x 30 mL), brine (30 mL), dried (Na<sub>2</sub>SO<sub>4</sub>), filtered and concentrated. The resulting residue was purified by chromatography (7:1 hexane–EtOAc) to give **28** (0.39 g, 53%) as a colorless oil: *R<sub>f</sub>* 0.70 (7:1 hexane–EtOAc); [ $\alpha$ ]<sub>D</sub> +91.3 (*c* 0.9, CHCl<sub>3</sub>); <sup>1</sup>H NMR (400 MHz, CDCl<sub>3</sub>,  $\delta$ <sub>H</sub>) 7.70–7.67 (m, 1H, Ar), 7.59–7.53 (m, 3H, Ar), 7.47–7.44 (m, 2H, Ar), 7.38–7.26 (m, 6H, Ar), 7.11 (d, 2H, *J* = 8.0 Hz, Ar), 5.80 (dd, 1H, *J*<sub>1,2</sub> = 1.8 Hz, *J*<sub>2,3</sub> = 3.2 Hz, H-2), 5.46 (d, 1H, *J*<sub>1,2</sub> = 1.8 Hz, H-1), 4.78, 4.61 (ABq, 2H, *J* = 11.5 Hz, ArCH<sub>2</sub>), 4.21 (dq, 1H, *J*<sub>4,5</sub> = 9.5 Hz, *J*<sub>5,6</sub> = 6.2 Hz, H-5), 3.91 (dd, 1H, *J*<sub>2,3</sub> = 3.2 Hz, *J*<sub>3,4</sub> = 9.5 Hz, H-3), 3.61 (s, 3H, OCH<sub>3</sub>), 3.33 (app t, 1H, *J*<sub>3,4</sub> = *J*<sub>4,5</sub> = 9.5 Hz, H-4), 2.32 (s, 3H, ArCH<sub>3</sub>), 1.40 (d, 3H, *J*<sub>5,6</sub> = 6.2 Hz, H-6); <sup>13</sup>C NMR (125.7 MHz, CDCl<sub>3</sub>,  $\delta$ <sub>C</sub>) 165.7 (C=O), 137.9 (Ar x 2), 134.5 (Ar), 133.2 (Ar), 132.3 (Ar), 130.6 (Ar), 130.1 (Ar), 129.9(3) (Ar), 129.8(7) (Ar x 2), 128.8(8) (Ar), 128.8(7) (Ar), 128.39 (Ar x 2), 128.33 (Ar x 2), 127.92 (Ar), 127.67 (Ar), 86.5, 82.4, 78.1, 71.7 (ArCH<sub>2</sub>), 71.1, 69.1, 61.2 (OCH<sub>3</sub>), 21.1 (ArCH<sub>3</sub>), 17.9 (C-6). HRMS (ESI) Calcd. for (M + Na)<sup>+</sup> C<sub>28</sub>H<sub>30</sub>NaO<sub>5</sub>S: 501.1712. Found 501.1710.

***p*-Methoxyphenyl 2-*O*-benzoyl-3-benzyl-6-deoxy-4-*O*-methyl- $\alpha$ -D-mannopyranosyl-(1→3)-4-*O*-allyl-2-*O*-methyl- $\alpha$ -L-fucopyranosyl-(1→3)-4-*O*-benzyl-2-*O*-methyl- $\alpha$ -L-rhamnopyranosyl-(1→3)-2,4-di-*O*-methyl- $\alpha$ -L-rhamnopyranoside (**29**)**

To a solution of donor **28** (131 mg, 0.27 mmol) and acceptor **27** (120 mg, 0.16 mmol) in CH<sub>2</sub>Cl<sub>2</sub> (20 mL), crushed 4 Å molecular sieves (200 mg) were added. After the mixture was stirred at rt for 30 min, it was cooled to –20 °C, NIS (67.4 mg, 0.3 mmol) and AgOTf (15.4 mg, 0.06 mmol) were added and the reaction mixture was stirred for additional 30 min at –20 °C before the addition of Et<sub>3</sub>N (1 mL). The solution was concentrated to a crude residue that was purified by chromatography (2:1 hexane–EtOAc) to give **29** (122 mg, 69%) as an amorphous solid: *R<sub>f</sub>* 0.38 (2:1 hexane–EtOAc); [ $\alpha$ ]<sub>D</sub> +28.5 (*c* 1.2, CHCl<sub>3</sub>); <sup>1</sup>H NMR (500 MHz, CDCl<sub>3</sub>,  $\delta$ <sub>H</sub>) 8.09–8.07 (m, 2H, Ar), 7.58–7.55 (m, 1H, Ar), 7.47–7.44 (m, 2H, Ar), 7.30–7.09 (m, 10H, Ar), 7.01–6.95 (m, 2H, Ar), 6.85–6.80 (m, 2H, Ar), 5.94–5.86 (m, 1H, CH<sub>2</sub>=CH), 5.67 (dd, 1H, *J*<sub>1''',2'''</sub> = 1.8

Hz,  $J_{2''',3'''} = 3.1$  Hz, H-2'''), 5.39 (d, 1H,  $J_{1,2} = 1.8$  Hz, H-1), 5.28–5.27 (m, 1H,  $\text{CH}_2=\text{CH}$ ), 5.25–5.24 (m, 1H,  $\text{CH}_2=\text{CH}$ ), 5.17–5.14 (m, 3H, H-1', H-1'', H-1'''), 5.13, 4.52 (ABq, 2H,  $J = 11.3$  Hz,  $\text{ArCH}_2$ ), 4.78.459 (ABq, 2H,  $J = 11.5$  Hz,  $\text{ArCH}_2$ ), 4.34–4.30 (m, 1H,  $-\text{CH}_2\text{O}$ ), 4.23–4.20 (m, 2H, H-3'', H-5''), 4.10–4.06 (m, 2H, H-3',  $\text{CH}_2\text{O}$ ), 4.00 (dd, 1H,  $J_{2,3} = 3.2$  Hz,  $J_{3,4} = 9.5$  Hz, H-3), 3.94 (dq, 1H,  $J_{4',5'} = 9.5$  Hz,  $J_{5',6'} = 6.2$  Hz, H-5'), 3.90 (dd, 1H,  $J_{2''',3'''} = 3.1$  Hz,  $J_{3''',4'''} = 9.6$  Hz, H-3'''), 3.84–3.78 (m, 1H, H-2), 3.76 (s, 3H,  $\text{OCH}_3$ ), 3.75–3.68 (m, 4H, H-2', H-2'', H-5, H-5'''), 3.59 (s, 3H,  $\text{OCH}_3$ ), 3.54 (s, 3H,  $\text{OCH}_3$ ), 3.59 (s, 3H,  $\text{OCH}_3$ ), 3.54 (s, 3H,  $\text{OCH}_3$ ), 3.53–3.46 (m, 2H, H-4', H-4''), 3.50 (s, 3H,  $\text{OCH}_3$ ), 3.48 (s, 3H,  $\text{OCH}_3$ ), 3.31 (s, 3H,  $\text{OCH}_3$ ), 3.26 (app t, 1H,  $J_{3''',4'''} = J_{4''',5'''} = 9.6$  Hz, H-4'''), 3.22 (app t, 1H,  $J_{3,4} = J_{4,5} = 9.5$  Hz, H-4), 1.38 (d, 3H,  $J_{5''',6'''} = 6.3$  Hz, H-6'''), 1.33 (d, 3H,  $J_{5'',6''} = 6.5$  Hz, H-6''), 1.27 (d, 3H,  $J_{5',6'} = 6.2$  Hz, H-6'), 1.24 (d, 3H,  $J_{5,6} = 6.2$  Hz, H-6);  $^{13}\text{C}$  NMR (125.7 MHz,  $\text{CDCl}_3$ ,  $\delta_{\text{C}}$ ) 165.6 (C=O), 154.9 (Ar), 150.5 (Ar), 139.1 (Ar), 138.1 (Ar), 135.1 (=CH), 133.1 (Ar), 130.1 (Ar x 2), 129.9 (Ar x 2), 128.4 (Ar x 2), 128.3 (Ar x 2), 128.1 (Ar x 2), 127.9 (Ar x 2), 127.6 (Ar), 127.5 (Ar), 127.1 (Ar), 117.5 (Ar x 2), 117.3 ( $\text{CH}_2=$ ), 114.6 (Ar x 2), 99.7, 99.1, 98.5, 95.6, 82.4, 82.0, 81.5, 80.7, 80.2, 80.0, 79.5, 79.4, 79.0, 75.5, 75.1, 74.4, 71.3, 69.3, 68.7, 68.6(5), 68.5, 66.9, 61.3, 61.2 ( $\text{OCH}_3$ ), 58.9 ( $\text{OCH}_3$ ), 58.6 ( $\text{OCH}_3$ ), 57.8 ( $\text{OCH}_3$ ), 55.7 ( $\text{OCH}_3$ ), 55.6 ( $\text{OCH}_3$ ), 18.2, 18.2, 17.9, 16.8. HRMS (ESI) Calcd. for  $(\text{M} + \text{Na})^+ \text{C}_{60}\text{H}_{78}\text{NaO}_{19}$ : 1125.5030. Found 1125.5020.

***p*-Methoxyphenyl      3-benzyl-6-deoxy-2,4-di-*O*-methyl- $\alpha$ -D-mannopyranosyl-(1→3)-4-*O*-allyl-2-*O*-methyl- $\alpha$ -L-fucopyranosyl-(1→3)-4-*O*-benzyl-2-*O*-methyl- $\alpha$ -L-rhamnopyranosyl-(1→3)-2,4-di-*O*-methyl- $\alpha$ -L-rhamnopyranoside (30)**

To a solution of **29** (100 mg, 0.09 mmol) in 1:1  $\text{CH}_3\text{OH}-\text{CH}_2\text{Cl}_2$  (20 mL), 1M  $\text{NaOCH}_3$  (0.2 mL) was added and the reaction mixture was stirred for 5 h at rt. The reaction mixture was then neutralized by the addition of Amberlite IR-120  $\text{H}^+$  resin, filtered and concentrated. The resulting residue was dissolved in DMF (3 mL), and then  $\text{CH}_3\text{I}$  (0.1 mL) and NaH (60% in mineral oil, 10 mg) were added. The reaction mixture was stirred for 1 h at rt before chilled water (8 mL) was added. The solution was diluted with  $\text{CH}_2\text{Cl}_2$  (15 mL), washed



with water (2 x 10 mL) and finally brine (10 mL). The organic layer was separated, concentrated and the resulting residue was purified by chromatography (3:1 hexane–EtOAc) to give **30** (83 mg, 91%) as a colorless oil:  $R_f$  0.45 (3:1 hexane–EtOAc);  $[\alpha]_D -28.1$  ( $c$  1.1,  $\text{CHCl}_3$ );  $^1\text{H NMR}$  (500 MHz,  $\text{CDCl}_3$ ,  $\delta_{\text{H}}$ ) 7.40–7.22 (m, 10H, Ar), 7.00–6.96 (m, 2H, Ar), 6.83–6.81 (m, 2H, Ar), 5.92–5.84 (m, 1H, =CH), 5.39 (d, 1H,  $J_{1,2} = 1.8$  Hz, H-1), 5.26–5.22 (m, 1H,  $\text{CH}_2=\text{CH}$ ), 5.17–5.14 (m, 5H, H-1', H-1'', H-1''',  $\text{CH}_2=\text{CH}$ ,  $\text{ArCH}_2$ ), 4.72, 4.68 (ABq, 2H,  $J = 12.5$  Hz,  $\text{ArCH}_2$ ), 4.56 (d, 1H,  $J = 11.5$  Hz,  $\text{ArCH}_2$ ), 4.31–4.27 (m, 1H,  $\text{CH}_2\text{O}$ ), 4.21–4.14 (m, 2H, H-3'', H-5''), 4.07–4.02 (m, 2H, H-3',  $\text{CH}_2\text{O}$ ), 3.99 (dd, 1H,  $J_{2,3} = 3.3$  Hz,  $J_{3,4} = 9.6$  Hz, H-3), 3.94 (dq, 1H,  $J_{4,5'} = 9.5$  Hz,  $J_{5',6'} = 6.2$  Hz, H-5'), 3.76 (s, 3H,  $\text{OCH}_3$ ), 3.75–3.72 (m, 2H, H-3''', H-2), 3.70–3.67 (m, 2H, H-2', H-2''), 3.66–3.60 (m, 2H, H-5, H-5'''), 3.58 (s, 3H,  $\text{OCH}_3$ ), 3.53 (s, 3H,  $\text{OCH}_3$ ), 3.50 (s, 3H,  $\text{OCH}_3$ ), 3.48–3.46 (m, 3H, H-2''', H-4', H-4''), 3.47 (s, 3H,  $\text{OCH}_3$ ), 3.40 (s, 3H,  $\text{OCH}_3$ ), 3.22–3.18 (m, 2H, H-4, H-4'''), 3.17 (s, 3H,  $\text{OCH}_3$ ), 1.33–1.31 (m, 6H, H-6, H-6'), 1.26 (d, 3H,  $J_{5''',6'''} = 6.2$  Hz, H-6'''), 1.21 (d, 3H,  $J_{5'',6''} = 6.7$  Hz, H-6'');  $^{13}\text{C NMR}$  (125.7 MHz,  $\text{CDCl}_3$ ,  $\delta_{\text{C}}$ ) 154.9 (Ar), 150.5 (Ar), 139.3 (Ar), 138.5 (Ar), 135.1 (=CH), 128.3 (Ar x 2), 128.1 (Ar x 2), 127.9 (Ar x 2), 127.6 (Ar), 127.3 (Ar x 2), 127.2 (Ar), 117.5 (Ar x 2), 117.3 ( $\text{CH}_2=$ ), 114.6 (Ar x 2), 99.6, 98.5, 98.4, 95.5, 82.2, 82.0, 80.7, 80.2, 80.1, 79.6, 79.2, 79.0, 78.9, 78.4, 75.9, 75.0, 74.3, 72.2, 68.7(0), 68.6(5), 66.9, 61.2, 61.1, 58.8 ( $\text{OCH}_3$ ), 58.7 ( $\text{OCH}_3$ ), 58.1 ( $\text{OCH}_3$ ), 57.6 ( $\text{OCH}_3$ ), 57.6 ( $\text{OCH}_3$ ), 55.7 ( $\text{OCH}_3$ ), 55.6 ( $\text{OCH}_3$ ), 18.2, 17.9, 17.8, 16.8. HRMS (ESI) Calcd. for  $(\text{M} + \text{Na})^+ \text{C}_{54}\text{H}_{76}\text{NaO}_{18}$ : 1035.4924. Found 1035.4920.

***p*-Nonadecylphenyl 6-deoxy-2,4-di-*O*-methyl- $\alpha$ -D-mannopyranosyl-(1→3)-2,4-di-*O*-methyl- $\alpha$ -L-fucopyranosyl-(1→3)-2-*O*-methyl- $\alpha$ -L-rhamnopyranosyl-(1→3)-2,4-di-*O*-methyl- $\alpha$ -L-rhamnopyranoside (34)**

To a solution of **S48** (20 mg, 0.02 mmol) and **28** (13.4 mg, 0.03 mmol) in  $\text{CH}_2\text{Cl}_2$  (10 mL) was added crushed 4 Å molecular sieves (50 mg). After stirring for 30 min at rt, the reaction mixture cooled to  $-20$  °C, and then NIS (4.5 mg, 0.02 mmol) and AgOTf (1.6 mg, 0.006 mmol) were added. The reaction was stirred

for additional 30 min before the addition of Et<sub>3</sub>N (0.25 mL) concentration. The resulting crude residue was dissolved in 1:1 CH<sub>3</sub>OH–CH<sub>2</sub>Cl<sub>2</sub> (10 mL), and then 1M NaOCH<sub>3</sub> (0.1 mL) was added and the reaction mixture was stirred for 4 h at rt before being neutralized with Amberlite IR-120 H<sup>+</sup> resin, filtered and concentrated. The resulting residue was dissolved in DMF (2 mL), CH<sub>3</sub>I (0.2 mL) and NaH (60% in mineral oil, 5 mg) were added and the reaction mixture was stirred for 1 h at rt before the addition of chilled water (5 mL) and CH<sub>2</sub>Cl<sub>2</sub> (10 mL). The organic layer was washed with water (2 x 8 mL) and brine (8 mL), and then separated, dried (NaSO<sub>4</sub>), filtered, concentrated and the resulting residue was purified by chromatography (2:1 hexane–EtOAc) to give a syrup. To the solution of the syrup in CH<sub>2</sub>Cl<sub>2</sub> (10 mL), Pd–C (4 mg) was added and the reaction mixture was stirred overnight under a hydrogen atmosphere before it was filtered and concentrated. The resulting residue was purified by chromatography (20:1 CH<sub>2</sub>Cl<sub>2</sub>–CH<sub>3</sub>OH) to give **34** (12 mg, 59%) as a thick syrup: *R*<sub>f</sub> 0.55 (20:1 CH<sub>2</sub>Cl<sub>2</sub>–CH<sub>3</sub>OH); [α]<sub>D</sub> –48.8 (c 0.1, CHCl<sub>3</sub>); <sup>1</sup>H NMR (500 MHz, CDCl<sub>3</sub>, δ<sub>H</sub>) 7.11–7.09 (m, 2H, Ar-2,6), 7.00–6.97 (m, 2H, Ar-3,5), 5.47 (d, 1H, *J*<sub>1,2</sub> = 1.8 Hz, H-1), 5.24 (d, 1H, *J*<sub>1',2'</sub> = 1.7 Hz, H-1'), 5.20 (d, 1H, *J*<sub>1'',2''</sub> = 3.8 Hz, H-1''), 5.15 (d, 1H, *J*<sub>1''',2'''</sub> = 1.7 Hz, H-1'''), 4.17–4.14 (m, 2H, H-2''', H-3'), 4.04–3.97 (m, 2H, H-3, H-5'''), 3.87–3.81 (m, 2H, H-3'', H-5), 3.73–3.69 (m, 3H, H-2', H-5', H-5''), 3.66–3.62 (m, 2H, H-2, H-2''), 3.60 (s, 3H, OCH<sub>3</sub>), 3.59 (s, 3H, OCH<sub>3</sub>), 3.58–3.57 (m, 1H, H-3'''), 3.56 (s, 3H, OCH<sub>3</sub>), 3.55 (s, 3H, OCH<sub>3</sub>), 3.53–3.51 (m, 1H, H-4'), 3.50 (s, 3H, OCH<sub>3</sub>), 3.47 (s, 3H, OCH<sub>3</sub>), 3.46 (s, 3H, OCH<sub>3</sub>), 3.29–3.28 (m, 1H, H-4'''), 3.26 (app t, 1H, *J*<sub>3'',4''</sub> = *J*<sub>4'',5''</sub> = 9.6 Hz, H-4''), 3.00 (app t, 1H, *J*<sub>3,4</sub> = *J*<sub>4,5</sub> = 9.5 Hz, H-4), 2.56 (t, 1H, *J*<sub>1,2</sub> = 7.8 Hz, CH<sub>2</sub>-1<sub>agly</sub>), 2.42 (br s, 1H, OH), 1.80 (br s, 1H, OH), 1.62–1.56 (m, 2H, CH<sub>2</sub>-2<sub>agly</sub>), 1.40 (d, 3H, *J*<sub>5,6</sub> = 6.5 Hz, H-6), 1.34 (d, 3H, *J*<sub>5''',6'''</sub> = 6.5 Hz, H-6'''), 1.31–1.27 (m, 35H, H-6'', CH<sub>2</sub> x 16), 1.24 (d, 3H, *J*<sub>5',6'</sub> = 6.5 Hz, H-6'), 0.89 (t, 3H, *J*<sub>18,19</sub> = 7.0 Hz, CH<sub>3</sub>-19<sub>agly</sub>); <sup>13</sup>C NMR (125.7 MHz, CDCl<sub>3</sub>, δ<sub>C</sub>) 154.5 (Ar), 136.8 (Ar), 129.3 (Ar x 2), 116.1 (Ar x 2), 101.4, 97.7, 97.6, 95.4, 84.0, 82.7, 82.2, 81.3, 80.7, 80.5, 78.8, 77.5, 75.7, 72.6, 71.6, 71.3, 69.1, 68.8, 67.1, 66.8, 62.0 (OCH<sub>3</sub>), 61.0 (OCH<sub>3</sub>), 61.1 (OCH<sub>3</sub>), 59.3 (OCH<sub>3</sub>), 58.6 (OCH<sub>3</sub>), 57.3 (OCH<sub>3</sub>), 57.1 (OCH<sub>3</sub>), 35.1 (CH<sub>2</sub>), 32.0 (CH<sub>2</sub>), 31.7 (CH<sub>2</sub>), 29.7 (CH<sub>2</sub> x 10), 29.6 (CH<sub>2</sub>), 29.6 (CH<sub>2</sub>), 29.4 (CH<sub>2</sub>), 29.3 (CH<sub>2</sub>), 22.7 (CH<sub>2</sub>), 18.1,

17.8(7), 17.8(4), 16.2, 14.1 (C-19<sub>agly</sub>). HRMS (ESI) Calcd for (M + Na)<sup>+</sup> C<sub>56</sub>H<sub>98</sub>O<sub>17</sub>Na: 1065.6696. Found 1065.6691.

#### 4-Nonadecylphenol (35)

To a solution of **S43** (0.5 g, 1.33 mmol) and *n*-Bu<sub>4</sub>NI (1.23 g, 3.33 mmol) in CH<sub>2</sub>Cl<sub>2</sub> (20 mL) at -78 °C, BCl<sub>3</sub> (3.3 mL of 1M soln in heptanol, 3.33 mmol) was added dropwise over 5 min and then the reaction mixture was stirred for 30 min. After warming to rt, water (30 mL) was added and the solution was diluted with CH<sub>2</sub>Cl<sub>2</sub> (50 mL), and then washed with water (2 x 30 mL) and brine (30 mL). The organic layer was dried (Na<sub>2</sub>SO<sub>4</sub>), filtered, concentrated and the resulting residue was purified by chromatography (7:1 hexane–EtOAc) to afford **35** (460 mg, 96%) as an amorphous solid: *R*<sub>f</sub> 0.46 (7:1 hexane–EtOAc); <sup>1</sup>H NMR (400 MHz, CDCl<sub>3</sub>, δ<sub>H</sub>) 7.06–7.02 (m, 2H, Ar-2,6), 6.76–6.73 (m, 2H, Ar-3,5), 2.53 (t, 2H, *J*<sub>1',2'</sub> = 7.6 Hz, CH<sub>2</sub>-1'), 1.61–1.55 (m, 2H, CH<sub>2</sub>-2'), 1.32–1.26 (m, 32 H, CH<sub>2</sub> x 16), 0.89 (t, 3H, *J*<sub>18',19'</sub> = 7.4 Hz, CH<sub>3</sub>-19'); <sup>13</sup>C NMR (125.7 MHz, CDCl<sub>3</sub>, δ<sub>C</sub>) 153.5 (Ar), 135.4 (Ar), 129.6 (Ar x 2), 115.2 (Ar x 2), 35.2 (CH<sub>2</sub>), 32.3 (CH<sub>2</sub>), 31.9 (CH<sub>2</sub>), 29.9 (CH<sub>2</sub> x 11), 29.8 (CH<sub>2</sub>), 29.7 (CH<sub>2</sub>), 29.5 (CH<sub>2</sub>), 29.4 (CH<sub>2</sub>), 14.3 (CH<sub>3</sub>-19'). HRMS (ESI) Calcd for (M)<sup>+</sup> C<sub>25</sub>H<sub>44</sub>O: 360.3392. Found 360.3390.

#### *p*-Methoxyphenyl 4-*O*-benzyl-2-*O*-methyl- $\alpha$ -L-rhamnopyranoside (S1)

Diol **S14** (1 g, 2.77 mmol) was dissolved in toluene (40 mL) and *n*-Bu<sub>2</sub>SnO (0.7 g, 2.77 mmol) was added. The reaction mixture was stirred at 120 °C for 1 h and then it was cooled to 62 °C before PMBCl (0.5 g, 3.05 mmol) and *n*-Bu<sub>4</sub>NI (1.02 g, 2.77 mmol) were added. The reaction mixture was stirred at 62 °C for additional 7 h and then concentrated. The resulting crude product was purified by chromatography (1:1 hexane–EtOAc) to give colorless syrup. This syrup (1.05 g) was dissolved in DMF (10 mL) and CH<sub>3</sub>I (0.2 mL, 3.32 mmol) was added. The reaction mixture was cooled to 0 °C before NaH (60% in mineral oil, 106 mg, 4.43 mmol) was added and then the solution was stirred for additional 1 h at rt. Chilled water (20 mL) was added and the

solution was diluted with CH<sub>2</sub>Cl<sub>2</sub> (50 mL). The organic layer was separated, washed with water (2 x 40 mL), brine (40 mL), dried (Na<sub>2</sub>SO<sub>4</sub>), filtered and concentrated. The resulting residue was dissolved in CH<sub>2</sub>Cl<sub>2</sub> (30 mL) and TFA (1.5 mL) was added dropwise over 2 min at 0 °C. The reaction mixture was stirred for additional 30 min at 0 °C before Et<sub>3</sub>N (3 mL) was added. The mixture was concentrated and the resulting residue was purified by chromatography (1:1 hexane–EtOAc) to give **S1** (0.84 g, 81%) as an amorphous solid: *R<sub>f</sub>* 0.55 (1:1 hexane–EtOAc); [ $\alpha$ ]<sub>D</sub> –29.5 (*c* 0.4, CHCl<sub>3</sub>); <sup>1</sup>H NMR (400 MHz, CDCl<sub>3</sub>,  $\delta$ <sub>H</sub>) 7.39–7.27 (m, 5H, Ar), 7.01–6.98 (m, 2H, Ar-2,6), 6.85–6.81 (m, 2H, Ar-3,5), 5.46 (d, 1H, *J*<sub>1,2</sub> = 1.7 Hz, H-1), 4.93, 4.70 (ABq, 2H, *J* = 11.3 Hz, ArCH<sub>2</sub>), 4.15–4.13 (m, 1H, H-3), 3.81 (dq, 1H, *J*<sub>4,5</sub> = 9.5 Hz, *J*<sub>5,6</sub> = 6.2 Hz, H-5), 3.78 (s, 3H, OCH<sub>3</sub>), 3.68 (dd, 1H, *J*<sub>1,2</sub> = 1.7 Hz, *J*<sub>2,3</sub> = 3.5 Hz, H-2), 3.55 (s, 3H, OCH<sub>3</sub>), 3.34 (app t, 1H, *J*<sub>3,4</sub> = *J*<sub>4,5</sub> = 9.5 Hz, H-4), 2.44 (br s, 1H, OH-3), 1.29 (d, 3H, *J*<sub>5,6</sub> = 6.4 Hz, H-6); <sup>13</sup>C NMR (125.7 MHz, CDCl<sub>3</sub>,  $\delta$ <sub>C</sub>) 154.9 (Ar), 150.4 (Ar), 138.4 (Ar), 128.4 (Ar x 2), 128.0 (Ar x 2), 127.8 (Ar), 117.5 (Ar x 2), 114.6 (Ar x 2), 95.2, 82.1, 80.6, 75.1 (ArCH<sub>2</sub>), 71.5, 67.8, 59.1 (OCH<sub>3</sub>), 55.7 (OCH<sub>3</sub>), 18.0 (C-6). HRMS (ESI) Calcd. for (M + Na)<sup>+</sup> C<sub>21</sub>H<sub>26</sub>NaO<sub>6</sub>: 397.1622. Found 397.1629.

### ***p*-Methoxyphenyl 2,4-di-*O*-methyl- $\alpha$ -L-rhamnopyranoside (S2)**

To a solution of **S16** (1.3 g, 3.22 mmol) and CH<sub>3</sub>I (0.25 mL, 3.86 mmol) in DMF (10 mL), NaH (60% in mineral oil, 0.13 g, 5.15 mmol) was added at 0 °C. The reaction mixture was stirred for 4 h at rt before chilled water (30 mL) was added. The solution was concentrated, diluted with CH<sub>2</sub>Cl<sub>2</sub> (100 mL) and washed with water (2 x 100 mL). The organic layer was separated, dried (Na<sub>2</sub>SO<sub>4</sub>), filtered, concentrated. The resulting residue was dissolved in CH<sub>2</sub>Cl<sub>2</sub> (30 mL) and TFA (1.5 mL, 5% v/v) was added at 0 °C. The solution was stirred for additional 30 min and then Et<sub>3</sub>N (3 mL) was added. After concentration of the solution, the resulting residue was purified by chromatography (2:1 hexane–EtOAc) to give **S2** (0.78 g, 81%) as a colorless oil: *R<sub>f</sub>* 0.36 (2:1 hexane–EtOAc); [ $\alpha$ ]<sub>D</sub> –57.7 (*c* 1.1, CHCl<sub>3</sub>); <sup>1</sup>H NMR (500 MHz, CDCl<sub>3</sub>,  $\delta$ <sub>H</sub>) 7.03–6.99 (m, 2H, Ar-2,6), 6.87–6.81 (m, 2H, Ar-3,5), 5.45 (d, 1H, *J*<sub>1,2</sub> = 1.7 Hz, H-1), 4.05 (ddd, 1H, *J*<sub>2,3</sub> =

3.3 Hz,  $J_{3,4} = 9.3$  Hz,  $J_{3,\text{OH-3}} = 8.9$  Hz, H-3), 3.80 (s, 3H, OCH<sub>3</sub>), 3.74 (dq, 1H,  $J_{4,5} = 9.3$  Hz,  $J_{5,6} = 6.3$  Hz, H-5), 3.68 (dd, 1H,  $J_{1,2} = 1.7$  Hz,  $J_{2,3} = 3.3$  Hz, H-2), 3.62 (s, 3H, OCH<sub>3</sub>), 3.56 (s, 3H, OCH<sub>3</sub>), 3.07 (app t, 1H,  $J_{3,4} = J_{4,5} = 9.3$  Hz, H-4), 2.45 (d, 1H,  $J_{3,\text{OH-3}} = 8.9$  Hz, OH-3), 1.30 (d, 3H,  $J_{5,6} = 6.3$  Hz, H-6); <sup>13</sup>C NMR (125.7 MHz, CDCl<sub>3</sub>, δ<sub>C</sub>) 155.2 (Ar), 150.7 (Ar), 117.8 (Ar x 2), 114.9 (Ar x 2), 95.5, 84.0, 80.8, 71.4, 68.2, 61.2 (OCH<sub>3</sub>), 59.3 (OCH<sub>3</sub>), 55.9 (OCH<sub>3</sub>), 18.2 (C-6). HRMS (ESI) Calcd. for (M + Na)<sup>+</sup> C<sub>15</sub>H<sub>22</sub>NaO<sub>6</sub>: 321.1314. Found 321.1313.

### ***p*-Tolyl 2-*O*-acetyl-4-*O*-benzyl-3-*O*-*p*-methoxybenzyl-1-thio- $\alpha$ -L-rhamnopyranoside (S3)**

To a solution of **S20** (2.2 g, 4.58 mmol) in pyridine (5 mL) at 0 °C, Ac<sub>2</sub>O (3 mL) was added. The reaction mixture was stirred for 3 h at rt before water (10 mL) was added. The solution was concentrated, diluted with CH<sub>2</sub>Cl<sub>2</sub> (30 mL) and washed with water (2 × 30 mL). The organic layer was separated, dried (Na<sub>2</sub>SO<sub>4</sub>), filtered, concentrated and the resulting residue was purified by chromatography (5:1 hexane–EtOAc) to give **S3** (2.27 g, 95%) as an amorphous solid: *R*<sub>f</sub> 0.52 (5:1 hexane–EtOAc); [ $\alpha$ ]<sub>D</sub> -73.9 (*c* 1.2, CHCl<sub>3</sub>); <sup>1</sup>H NMR (400 MHz, CDCl<sub>3</sub>, δ<sub>H</sub>) 7.40–7.27 (m, 9H, Ar-H), 7.14 (d, 2H,  $J = 8.0$  Hz, Ar-H), 6.90–6.86 (m, 2H, Ar-H), 5.61 (dd, 1H,  $J_{1,2} = 1.7$  Hz,  $J_{2,3} = 3.3$  Hz, H-2), 5.35 (d, 1H,  $J_{1,2} = 1.7$  Hz, H-1), 4.95, 4.64 (ABq, 2H,  $J = 10.7$  Hz, ArCH<sub>2</sub>), 4.67, 4.51 (ABq, 2H,  $J = 11.0$  Hz, ArCH<sub>2</sub>), 4.25 (dq, 1H,  $J_{4,5} = 9.4$  Hz,  $J_{5,6} = 6.3$  Hz, H-5), 3.92 (dd, 1H,  $J_{2,3} = 3.3$  Hz,  $J_{3,4} = 9.4$  Hz, H-3), 3.82 (s, 3H, OCH<sub>3</sub>), 3.50 (app t, 1H,  $J_{3,4} = J_{4,5} = 9.4$  Hz, H-4), 2.35 (s, 3H, CH<sub>3</sub>CO), 2.16 (s, 3H, ArCH<sub>3</sub>), 1.36 (d, 3H,  $J_{5,6} = 6.3$  Hz, H-6); <sup>13</sup>C NMR (125.7 MHz, CDCl<sub>3</sub>, δ<sub>C</sub>) 170.5 (C=O), 159.6 (Ar), 138.7 (Ar), 138.1 (Ar), 132.6 (Ar x 2), 130.4 (Ar x 2), 130.1 (Ar x 4), 128.6 (Ar x 2), 128.2 (Ar x 2), 128.0 (Ar), 114.1 (Ar x 2), 86.8, 80.4, 78.1, 75.7 (ArCH<sub>2</sub>), 71.7 (ArCH<sub>2</sub>), 70.9, 69.3, 55.5 (OCH<sub>3</sub>), 21.4 (ArCH<sub>3</sub>), 18.1 (C-6). HRMS (ESI) Calcd. for (M + Na)<sup>+</sup> C<sub>30</sub>H<sub>34</sub>NaO<sub>6</sub>S: 545.1968. Found 545.1967.

#### ***p*-Tolyl 3,4-*O*-isopropylidene-2-*O*-methyl-1-thio- $\beta$ -L-fucopyranoside (S4)**

To a solution of **S22** (2 g, 6.45 mmol) and CH<sub>3</sub>I (0.5 mL, 7.73 mmol) in DMF (15 mL), at 0 °C, NaH (60% in mineral oil, 0.25 g, 10.3 mmol) was added portion-wise over 10 min. The reaction mixture was stirred for 4 h at rt before it water (30 mL) was added. The solution was concentrated, diluted with CH<sub>2</sub>Cl<sub>2</sub> (100 mL), and washed with water (2 × 100 mL). The organic layer was dried (Na<sub>2</sub>SO<sub>4</sub>), filtered, concentrated, and the resulting residue was purified by chromatography (3:1 hexane–EtOAc) to give **S4** (1.96 g, 94%) as a colorless oil: *R<sub>f</sub>* 0.42 (3:1 hexane–EtOAc); [ $\alpha$ ]<sub>D</sub> –41.9 (*c* 0.9, CHCl<sub>3</sub>); <sup>1</sup>H NMR (500 MHz, CDCl<sub>3</sub>,  $\delta$ <sub>H</sub>) 7.45–7.43 (m, 2H, Ar-2,6), 7.10–7.08 (m, 2H, Ar-3,5), 4.41 (d, 1H, *J* = 9.7 Hz, H-1), 4.09 (app t, 1H, *J*<sub>1,2</sub> = *J*<sub>2,3</sub> = 9.7 Hz, H-2), 4.00 (dd, 1H, *J*<sub>3,4</sub> = 2.9 Hz, *J*<sub>4,5</sub> = 2.1 Hz, H-4), 3.76 (dq, 1H, *J*<sub>4,5</sub> = 2.1 Hz, *J*<sub>5,6</sub> = 6.5 Hz, H-5), 3.52 (s, 3H, ArOCH<sub>3</sub>), 3.20 (dd, 1H, *J*<sub>2,3</sub> = 9.7 Hz, *J*<sub>3,4</sub> = 2.9 Hz, H-3), 2.31 (s, 3H, ArCH<sub>3</sub>), 1.46 (s, 3H, (CH<sub>3</sub>)<sub>2</sub>C), 1.37 (d, 3H, *J*<sub>5,6</sub> = 6.5 Hz, H-6), 1.33 (s, 3H, (CH<sub>3</sub>)<sub>2</sub>C); <sup>13</sup>C NMR (125.7 MHz, CDCl<sub>3</sub>,  $\delta$ <sub>C</sub>) 137.6 (Ar), 132.9 (Ar x 2), 129.6 (Ar), 129.5 (Ar x 2), 109.6 ((CH<sub>3</sub>)<sub>2</sub>C), 86.3, 80.4, 79.7, 76.4, 72.4, 59.6 (ArOCH<sub>3</sub>), 28.0 ((CH<sub>3</sub>)<sub>2</sub>C), 26.4 ((CH<sub>3</sub>)<sub>2</sub>C), 21.1 (ArCH<sub>3</sub>), 21.08 (C-6). (ESI) Calcd. for (M + Na)<sup>+</sup> C<sub>17</sub>H<sub>24</sub>O<sub>4</sub>SNa: 347.1293. Found 347.1289.

#### ***p*-Tolyl 2-*O*-benzoyl-3,4,6-tri-*O*-benzyl-1-thio- $\alpha$ -D-mannopyranoside (S5)**

To a solution of compound **S37** (1.22 g, 2.41 mmol) in Ac<sub>2</sub>O (20 mL), H<sub>2</sub>SO<sub>4</sub> (0.2 mL) was added at 0 °C. The reaction mixture was stirred for additional 1 h at 0 °C before the addition of satd. aq. NaHCO<sub>3</sub> soln (15 mL), water (15 mL) and CH<sub>2</sub>Cl<sub>2</sub> (50 mL). The organic layer was separated, washed with satd. aq. NaHCO<sub>3</sub> soln (2 x 40 mL), brine (40 mL), dried (Na<sub>2</sub>SO<sub>4</sub>), filtered and concentrated. The resulting residue was dissolved in CH<sub>2</sub>Cl<sub>2</sub> (20 mL) and *p*-thiocresol (0.38 g, 3.13 mmol) was added. To this solution, BF<sub>3</sub>·Et<sub>2</sub>O (0.4 mL, 3.13 mmol) was added at 0 °C and the mixture was stirred overnight at rt. Then, satd. aq. NaHCO<sub>3</sub> soln (20 mL) and CH<sub>2</sub>Cl<sub>2</sub> (20 mL) were added. The organic layer was separated, washed with water (2 x 30 mL), brine (40 mL), dried (Na<sub>2</sub>SO<sub>4</sub>), filtered and concentrated. The resulting crude product was purified by

chromatography (6:1 hexane–EtOAc) to give an oil. To the solution of this oil in 1:1 CH<sub>3</sub>OH–CH<sub>2</sub>Cl<sub>2</sub> (20 mL), 1M NaOCH<sub>3</sub> (0.2 mL) was added and the reaction mixture was stirred for 2 h at rt. The solution was then neutralized by the addition of Amberlite IR-120 H<sup>+</sup> resin, filtered and concentrated. The resulting residue was dissolved in pyridine (8 mL) and BzCl (0.3 mL, 3.13 mmol) was added at 0 °C. The reaction mixture was stirred for additional 2 h at rt before the addition of water (30 mL). The solution was diluted with CH<sub>2</sub>Cl<sub>2</sub> (50 mL), washed with satd. aq. NaHCO<sub>3</sub> soln (2 x 40 mL), brine (40 mL), dried (Na<sub>2</sub>SO<sub>4</sub>), filtered and concentrated. The resulting residue was purified by chromatography (6:1 hexane–EtOAc) to give **S5** (0.94 g, 59%) as a colorless oil: *R*<sub>f</sub> 0.65 (6:1 hexane–EtOAc); [α]<sub>D</sub> +36.7 (*c* 1.0, CHCl<sub>3</sub>); <sup>1</sup>H NMR (400 MHz, CDCl<sub>3</sub>, δ<sub>H</sub>) 8.19–8.17 (m, 3H, Ar), 8.08–8.06 (m, 1H, Ar), 7.70–7.67 (m, 2H, Ar), 7.57–7.52 (m, 4H, Ar), 7.47–7.24 (m, 13H, Ar), 7.08–7.06 (m, 1H, Ar), 5.88 (dd, 1H, *J*<sub>1,2</sub> = 1.8 Hz, *J*<sub>2,3</sub> = 3.0 Hz, H-2), 5.59 (d, 1H, *J*<sub>1,2</sub> = 1.8 Hz, H-1), 4.92, 4.59 (ABq, 2H, *J* = 10.8 Hz, ArCH<sub>2</sub>), 4.82, 4.62 (ABq, 2H, *J* = 11.5 Hz, ArCH<sub>2</sub>), 4.71, 4.52 (ABq, 2H, *J* = 11.8 Hz, ArCH<sub>2</sub>), 4.43 (ddd, 1H, *J*<sub>4,5</sub> = 9.7 Hz, *J*<sub>5,6a</sub> = 4.1 Hz, *J*<sub>5,6b</sub> = 4.1 Hz, H-5), 4.18 (app t, 1H, *J*<sub>3,4</sub> = *J*<sub>4,5</sub> = 9.7 Hz, H-4), 4.09 (dd, 1H, *J*<sub>5,6a</sub> = 4.1 Hz, *J*<sub>6a,6b</sub> = 10.9 Hz, H-6a), 3.96 (dd, 1H, *J*<sub>2,3</sub> = 3.0 Hz, *J*<sub>3,4</sub> = 9.7 Hz, H-3), , 3.81 (dd, 1H, *J*<sub>5,6b</sub> = 1.8 Hz, *J*<sub>6a,6b</sub> = 10.9 Hz, H-6b), 2.31 (s, 3H, ArCH<sub>3</sub>); <sup>13</sup>C NMR (125.7 MHz, CDCl<sub>3</sub>, δ<sub>C</sub>) 165.6 (C=O), 138.4 (Ar), 138.3 (Ar), 137.9(6) (Ar), 137.9(3) (Ar), 134.5 (Ar), 133.2 (Ar), 133.0 (Ar), 132.4 (Ar), 130.6 (Ar x 3), 129.9(5) (Ar), 129.9(0) (Ar), 129.9 (Ar), 129.7 (Ar x 2), 128.8(9) (Ar x 3), 128.8(8) (Ar), 128.4(1) (Ar), 128.3(9) (Ar), 128.3(5) (Ar), 128.3 (Ar), 128.2 (Ar), 128.0 (Ar), 127.8 (Ar), 127.7 (Ar), 127.5(3) (Ar), 127.4(6) (Ar), 99.0, 78.4, 75.4, 74.6, 73.7, 72.0, 71.5, 69.2, 68.9, 21.1 (ArCH<sub>3</sub>). HRMS (ESI) Calcd. for (M + Na)<sup>+</sup> C<sub>41</sub>H<sub>40</sub>NaO<sub>6</sub>S: 683.2443. Found 683.2444.

#### ***p*-Tolyl 2-*O*-benzoyl-3,6-di-*O*-benzyl-4-*O*-methyl-1-thio- $\alpha$ -D-mannopyranoside (S6)**

To a solution of compound **S39** (1.04 g, 2.42 mmol) in Ac<sub>2</sub>O (15 mL), H<sub>2</sub>SO<sub>4</sub> (0.15 mL) was added at 0 °C and the reaction mixture was stirred for additional 1 h at 0 °C. A solution of satd. aq. NaHCO<sub>3</sub> soln (25 mL)

was added followed by water (25 mL) and CH<sub>2</sub>Cl<sub>2</sub> (60 mL). The organic layer was separated, washed with satd. aq. NaHCO<sub>3</sub> soln (2 x 50 mL), brine (50 mL), dried (Na<sub>2</sub>SO<sub>4</sub>), filtered and concentrated. The resulting residue was dissolved in CH<sub>2</sub>Cl<sub>2</sub> (30 mL) and *p*-thiocresol (0.4 g, 3.13 mmol) was added. To this solution, BF<sub>3</sub>·Et<sub>2</sub>O (0.4 mL, 3.13 mmol) was added at 0 °C and the mixture was stirred overnight at rt. The reaction A solution of satd. aq. NaHCO<sub>3</sub> (50 mL) was added and then resulting mixture was diluted with CH<sub>2</sub>Cl<sub>2</sub> (30 mL). The organic layer was separated, washed with water (2 x 50 mL), brine (50 mL), dried (Na<sub>2</sub>SO<sub>4</sub>), filtered and concentrated. The resulting crude product was purified by chromatography (6:1 hexane–EtOAc) to give a thick syrup. This syrup was dissolved in 1:1 CH<sub>3</sub>OH–CH<sub>2</sub>Cl<sub>2</sub> (20 mL) and catalytic amount of 1M NaOCH<sub>3</sub> (0.2 mL) was added. The reaction mixture was stirred for 2 h at rt and then it was neutralized by Amberlite IR-120 H<sup>+</sup> resin, filtered and concentrated. To the resulting residue in pyridine (10 mL), BzCl (0.3 mL, 3.13 mmol) was added at 0 °C. The reaction mixture was stirred for additional 2 h at rt before the addition of water (30 mL). The mixture was diluted with CH<sub>2</sub>Cl<sub>2</sub> (50 mL), washed with satd. aq. NaHCO<sub>3</sub> soln (2 x 40 mL), brine (40 mL), dried (Na<sub>2</sub>SO<sub>4</sub>), filtered and concentrated. The resulting residue was purified by chromatography (6:1 hexane–EtOAc) to give **S6** (0.96 g, 68%) as a colorless oil: *R*<sub>f</sub> 0.61 (6:1 hexane–EtOAc); [α]<sub>D</sub> +41.2 (*c* 1.0, CHCl<sub>3</sub>); <sup>1</sup>H NMR (400 MHz, CDCl<sub>3</sub>, δ<sub>H</sub>) 8.06–8.04 (m, 2H, Ar), 7.55–7.52 (m, 1H, Ar), 7.41–7.26 (m, 14H, Ar), 7.08–7.06 (d, 2H, *J* = 8.0 Hz, Ar), 5.83 (dd, 1H, *J*<sub>1,2</sub> = 1.6 Hz, *J*<sub>2,3</sub> = 3.0 Hz, H-2), 5.57 (d, 1H, *J*<sub>1,2</sub> = 1.6 Hz, H-1), 4.81, 4.63 (ABq, 2H, *J* = 12.0 Hz, ArCH<sub>2</sub>), 4.74, 4.56 (ABq, 2H, *J* = 11.5 Hz, ArCH<sub>2</sub>), 4.32 (ddd, 1H, *J*<sub>4,5</sub> = 9.6 Hz, *J*<sub>5,6a</sub> = 4.2 Hz, *J*<sub>5,6b</sub> = 1.8 Hz, H-5), 3.98–3.93 (m, 2H, H-3, H-6a), 3.87 (app t, 1H, *J*<sub>3,4</sub> = *J*<sub>4,5</sub> = 9.5 Hz, H-4), 3.81 (dd, 1H, *J*<sub>5,6b</sub> = 1.8 Hz, *J*<sub>6a,6b</sub> = 10.9 Hz, H-6b), 3.57 (s, 3H, OCH<sub>3</sub>), 2.31 (s, 3H, ArCH<sub>3</sub>); <sup>13</sup>C NMR (125.7 MHz, CDCl<sub>3</sub>, δ<sub>C</sub>) 165.6 (C=O), 138.5 (Ar), 137.9 (Ar x 2), 137.8 (Ar), 133.2 (Ar), 132.4 (Ar), 130.6 (Ar), 130.0 (Ar x 2), 129.9 (Ar x 2), 128.9 (Ar), 128.3(8) (Ar x 2), 128.3(6) (Ar x 2), 128.3 (Ar x 2), 128.0 (Ar x 2), 127.7 (Ar), 127.4(7) (Ar x 2), 127.4(4) (Ar), 86.9, 78.4, 76.3, 73.4, 72.6, 70.7, 69.2, 61.1 (OCH<sub>3</sub>), 21.1 (ArCH<sub>3</sub>). HRMS (ESI) Calcd. for (M + Na)<sup>+</sup> C<sub>35</sub>H<sub>36</sub>NaO<sub>6</sub>S: 607.2130. Found 607.2131.



### ***p*-Tolyl 2-*O*-acetyl-3-*O*-levulinoyl-4-*O*-methyl-1-thio- $\alpha$ -L-rhamnopyranoside (S7)**

To a solution of **S44** (0.78 g, 2.77 mmol) and triethyl orthoacetate (1.0 mL, 5.55 mmol) in CH<sub>2</sub>Cl<sub>2</sub> (20 mL) was added CSA (128 mg, 0.55 mmol). The reaction mixture was stirred for 2 h at rt before it was concentrated and dissolved in 80% aqueous HOAc. After stirring for additional 30 min at rt. water (10 mL) was added to the solution and it was concentrated. The mixture was diluted with CH<sub>2</sub>Cl<sub>2</sub> (20 mL) and washed with water (2 × 20 mL). The organic layer was dried (Na<sub>2</sub>SO<sub>4</sub>), filtered, concentrated, and the resulting syrup was carried to the next step without further purification. To a solution of the syrup in CH<sub>2</sub>Cl<sub>2</sub> (20 mL) were added levulinic acid (0.4 mL, 3.60 mmol), DCC (0.74g, 3.60 mmol) and DMAP (67 mg, 0.55 mmol) and the reaction mixture was stirred for 3 h at rt. The solution was filtered, concentrated, and the resulting residue was purified by chromatography (4:1 hexane–EtOAc) to give **S7** (0.96 g, 8 %) as a colorless oil: *R*<sub>f</sub> 0.46 (4:1 hexane–EtOAc); [ $\alpha$ ]<sub>D</sub> –76.4 (c 0.2, CHCl<sub>3</sub>); <sup>1</sup>H NMR (400 MHz, CDCl<sub>3</sub>,  $\delta$ H) 7.35–7.32 (m, 2H, Ar-2,6), 7.12–7.08 (m, 2H, Ar-3,5), 5.46 (dd, 1H, *J*<sub>1,2</sub> = 1.8 Hz, *J*<sub>2,3</sub> = 3.3 Hz, H-2), 5.29 (d, 1H, *J*<sub>1,2</sub> = 1.8 Hz, H-1), 5.27 (dd, 1H, *J*<sub>2,3</sub> = 3.3 Hz, *J*<sub>3,4</sub> = 9.5 Hz, H-3), 4.22 (dq, 1H, *J*<sub>4,5</sub> = 9.5 Hz, *J*<sub>5,6</sub> = 6.4 Hz, H-5), 3.53 (s, 3H, OCH<sub>3</sub>), 3.29 (app t, 1H, *J*<sub>3,4</sub> = *J*<sub>4,5</sub> = 9.5 Hz, H-4), 2.89–2.49 (m, 4H, CH<sub>2</sub>CO, CH<sub>2</sub>COO), 2.33 (s, 3H, ArCH<sub>3</sub>), 2.21 (s, 3H, CH<sub>3</sub>CO), 2.13 (s, 3H, CH<sub>3</sub>CO), 1.36 (d, 3H, *J*<sub>5,6</sub> = 6.4 Hz, H-6); <sup>13</sup>C NMR (125.7 MHz, CDCl<sub>3</sub>,  $\delta$ <sub>C</sub>) 206.7 (C=O), 172.0 (C=O), 170.2 (C=O), 138.2 (Ar), 132.7 (Ar), 132.7 (Ar x 2), 130.1 (Ar x 2), 86.2, 80.6, 72.3, 71.9, 69.2, 60.9 (OCH<sub>3</sub>), 38.1, 30.1, 28.2, 21.4, 21.2 (ArCH<sub>3</sub>), 17.9. HRMS (ESI) Calcd for (M + Na)<sup>+</sup> C<sub>21</sub>H<sub>28</sub>O<sub>7</sub>NaS: 447.1448. Found 447.1446.

### ***p*-Tolyl 2-*O*-acetyl-4-*O*-benzyl-3-*O*-levulinoyl-1-thio- $\alpha$ -L-rhamnopyranoside (S8)**

To a solution of compound **S45** (0.9 g, 2.23 mmol) in CH<sub>2</sub>Cl<sub>2</sub> (20 mL), levulinic acid (0.4 mL, 3.60 mmol), DCC (0.74 g, 3.60 mmol) and DMAP (67 mg, 0.55 mmol) were added and the reaction mixture was stirred for 3 h at rt. The solution was filtered, concentrated, and the resulting residue was purified by

chromatography (4:1 hexane–EtOAc) to give **S8** (1.03 g, 92%) as a colorless oil:  $R_f$  0.42 (4:1 hexane–EtOAc);  $[\alpha]_D -96.6$  ( $c$  0.3,  $\text{CHCl}_3$ );  $^1\text{H NMR}$  (400 MHz,  $\text{CDCl}_3$ ,  $\delta_{\text{H}}$ ) 7.39–7.28 (m, 7H, Ar), 7.12 (d, 2H,  $J = 8.4$  Hz, Ar-2,6), 5.51 (dd, 1H,  $J_{1,2} = 1.8$  Hz,  $J_{2,3} = 3.3$  Hz, H-2), 5.34–5.31 (m, 2H, H-1, H-3), 4.79, 4.68 (ABq,  $J = 11.2$  Hz, Ar $\text{CH}_2$ ), 4.38 (dq, 1H,  $J_{4,5} = 9.4$  Hz,  $J_{5,6} = 6.2$  Hz, H-5), 3.60 (app t, 1H,  $J_{3,4} = J_{4,5} = 9.4$  Hz, H-4), 2.80–2.66 (m, 2H,  $\text{COCH}_2$ ), 2.55–2.49 (m, 2H,  $\text{CH}_2\text{CO}$ ), 2.34 (s, 3H, Ar $\text{CH}_3$ ), 2.19 (s, 3H,  $\text{CH}_3\text{COCH}_2$ ), 2.15 (s, 3H,  $\text{CH}_3\text{CO}$ ), 1.37 (d, 3H,  $J_{5,6} = 6.2$  Hz, H-6);  $^{13}\text{C NMR}$  (125.7 MHz,  $\text{CDCl}_3$ ,  $\delta_{\text{C}}$ ) 206.4 (C=O), 172.0 (C=O), 170.2 (C=O), 138.3 (Ar), 138.2 (Ar), 132.7 (Ar x 2), 130.1 (Ar x 2), 130.0 (Ar), 128.7 (Ar x 2), 128.1 (Ar), 128.0 (Ar x 2), 86.3, 79.1, 77.0, 72.6, 72.0, 69.2, 38.1, 30.1, 28.2, 21.4, 21.2 (Ar $\text{CH}_3$ ), 18.1. HRMS (ESI) Calcd for  $(\text{M} + \text{Na})^+ \text{C}_{27}\text{H}_{32}\text{O}_7\text{NaS}$ : 523.1761. Found 523.1755.

#### ***p*-Tolyl 2,4-di-*O*-methyl-3-*O*-*p*-methoxybenzyl-1-thio- $\beta$ -L-fucopyranoside (**S9**)**

To a solution of **S27** (0.89 g, 2.21 mmol) and  $\text{CH}_3\text{I}$  (0.21 mL, 3.32 mmol) in DMF (10 mL) at 0 °C, NaH (60% in mineral oil, 110 mg, 4.43 mmol) was added after. The reaction mixture was stirred for 1 h at rt and then diluted with chilled water (30 mL), and  $\text{CH}_2\text{Cl}_2$  (30 mL). The organic layer was washed with water (2 x 20 mL), brine (20 mL) and then dried ( $\text{NaSO}_4$ ), filtered, concentrated and the resulting oil was purified by chromatography (4:1 hexanes–EtOAc) to yield **S9** (0.82 g, 89%) as a colorless oil:  $R_f$  0.49 (4:1 hexane–EtOAc);  $[\alpha]_D -36.0$  ( $c$  0.5,  $\text{CHCl}_3$ );  $^1\text{H NMR}$  (400 MHz,  $\text{CDCl}_3$ ,  $\delta_{\text{H}}$ ) 7.46–7.44 (m, 2H, Ar), 7.31–7.25 (m, 2H, Ar), 7.10–7.05 (m, 2H, Ar), 6.90–6.86 (m, 2H, Ar), 4.68, 4.64 (ABq, 2H,  $J = 12.6$  Hz, Ar $\text{CH}_2$ ), 4.41 (d, 1H,  $J_{1,2} = 9.6$  Hz, H-1), 3.8 (s, 3H,  $\text{OCH}_3$ ), 3.61 (s, 3H,  $\text{OCH}_3$ ), 3.58 (s, 3H,  $\text{OCH}_3$ ), 3.49–3.39 (m, 3H, H-2, H-3, H-5), 3.27–3.26 (m, 1H, H-4), 2.39 (s, 3H, Ar $\text{CH}_3$ ) 1.27 (d, 3H,  $J_{5,6} = 6.4$  Hz, H-6);  $^{13}\text{C NMR}$  (125.7 MHz,  $\text{CDCl}_3$ ,  $\delta_{\text{C}}$ ) 137.4 (Ar), 132.2 (Ar), 130.7 (Ar x 2), 130.3 (Ar), 129. (Ar), 129.4 (Ar x 2), 129.3 (Ar x 2), 113.8 (Ar x 2), 88.1, 83.6, 79.7, 79.3, 74.5, 72.4, 61.8 ( $\text{OCH}_3$ ), 61.2 ( $\text{OCH}_3$ ), 55.3 ( $\text{OCH}_3$ ), 21.1 (Ar $\text{CH}_3$ ), 16.9. HRMS (ESI) Calcd. for  $(\text{M} + \text{Na})^+ \text{C}_{23}\text{H}_{30}\text{NaO}_5\text{S}$ : 441.1712. Found 441.1701.

### ***p*-Methoxyphenyl 2,3,4-tri-*O*-acetyl- $\alpha$ -L-rhamnopyranoside (S10)**

To a solution of 1,2,3,4-tetra-*O*-acetyl-L-rhamnopyranose (5 g, 15.05 mmol) and *p*-methoxyphenol (2.4 g, 18.05 mmol) in CH<sub>2</sub>Cl<sub>2</sub> (100 mL) at 0 °C was added BF<sub>3</sub>·OEt<sub>2</sub> (2.3 mL, 18.05 mmol) dropwise over 10 min. The reaction mixture was stirred for 6 h at 0 °C, diluted with CH<sub>2</sub>Cl<sub>2</sub> (100 mL) and washed with satd aq NaHCO<sub>3</sub> soln (100 mL) and brine (100 mL). The organic layer was separated, dried with Na<sub>2</sub>SO<sub>4</sub>, filtered and the resulting oil was purified by chromatography (3:1 hexane–EtOAc) to afford **S10** (5.24 g, 88%) as a colorless oil: *R*<sub>f</sub> 0.30 (3:1 hexane–EtOAc); [ $\alpha$ ]<sub>D</sub> +112.4 (*c*, 0.3 CH<sub>2</sub>Cl<sub>2</sub>); <sup>1</sup>H NMR (400 MHz, CDCl<sub>3</sub>,  $\delta$ <sub>H</sub>) 7.00 (d, 2H, *J* = 9.1 Hz, Ar-2,6), 6.83 (d, 2H, *J* = 9.1 Hz, Ar-3,5), 5.52–5.49 (dd, 1H, *J*<sub>2,3</sub> = 3.5 Hz, *J*<sub>3,4</sub> = 10.0 Hz, H-3), 5.43–5.42 (dd, 1H, *J*<sub>1,2</sub> = 1.9 Hz, *J*<sub>2,3</sub> = 3.5 Hz, H-2), 5.34 (d, 1H, *J*<sub>1,2</sub> = 1.9 Hz, H-1), 5.15 (app t, 1H, *J*<sub>3,4</sub> = *J*<sub>4,5</sub> = 10.0 Hz, H-4), 4.07–4.00 (dq, 1H, *J*<sub>4,5</sub> = 10 Hz, *J*<sub>5,6</sub> = 6.0 Hz, H-5), 3.77 (s, 3H, ArOCH<sub>3</sub>), 2.18 (s, 3H, CH<sub>3</sub>CO), 2.06 (s, 3H, CH<sub>3</sub>CO), 2.03 (s, 3H, CH<sub>3</sub>CO), 1.22 (d, 3H, *J*<sub>6,5</sub> = 6.0 Hz, H-6); <sup>13</sup>C NMR (125 MHz, CDCl<sub>3</sub>,  $\delta$ <sub>C</sub>) 170.1 (C=O), 170.0 (C=O), 169.98 (C=O), 117.6 (Ar x 2), 115.8 (Ar), 114.6 (Ar), 114.5 (Ar x 2), 96.4, 70.9, 69.7, 68.9, 66.9, 55.5, 20.7, 20.6(3), 20.5(8), 17.3. HRMS (ESI) calcd (M + Na)<sup>+</sup> C<sub>19</sub>H<sub>24</sub>O<sub>9</sub>Na: 419.1318. Found: 419.1317.

### ***p*-Methoxyphenyl $\alpha$ -L-rhamnopyranoside (S11)**

To a solution of **S10** (5 g, 12.6 mmol) in 1:1 CH<sub>2</sub>Cl<sub>2</sub>–CH<sub>3</sub>OH (100 mL) and 1M NaOCH<sub>3</sub> in CH<sub>3</sub>OH (1 mL) was added. After stirring for 2 h at rt, the reaction mixture was neutralized with Amberlite IR-120 H<sup>+</sup> resin, filtered, and concentrated. The resulting oil was purified by chromatography (10:1 CH<sub>2</sub>Cl<sub>2</sub>–CH<sub>3</sub>OH) to afford **S11** (3.27 g, 96%) as a white amorphous solid: *R*<sub>f</sub> 0.32 (10:1 CH<sub>2</sub>Cl<sub>2</sub>–CH<sub>3</sub>OH); [ $\alpha$ ]<sub>D</sub> +67.5 (*c*, 0.1 CH<sub>3</sub>OH); <sup>1</sup>H NMR (400 MHz, CD<sub>3</sub>OD,  $\delta$ <sub>H</sub>) 6.99–6.95 (m, 2H, Ar-2,6), 6.85–6.82 (m, 2H, Ar-3,5), 5.26 (d, 1H, *J*<sub>1,2</sub> = 1.8 Hz, H-1), 3.98–3.97 (m, 1H, H-3), 3.83 (dd, 1H, *J*<sub>1,2</sub> = 1.8 Hz, *J*<sub>2,3</sub> = 3.6 Hz, H-2), 3.74 (s, 3H, ArOCH<sub>3</sub>), 3.48–3.40 (m, 1H, H-5), 3.29–3.28 (m, 1H, H-4), 1.23 (d, 3H, *J*<sub>6,5</sub> = 6.0 Hz, H-6); <sup>13</sup>C NMR (125 MHz,

CDCl<sub>3</sub>, δ<sub>C</sub>) 156.3 (Ar), 151.7 (Ar), 118.7 (Ar x 2), 115.5 (Ar x 2), 100.6, 73.8, 72.1, 72.0, 70.3, 55.9, 17.8.

HRMS (ESI) calcd (M + Na)<sup>+</sup> C<sub>13</sub>H<sub>18</sub>O<sub>6</sub>Na: 293.1001. Found: 293.1001.

### ***p*-Methoxyphenyl 2,3-*O*-isopropylidene- $\alpha$ -L-rhamnopyranoside (S12)**

To a solution of **S11** (3 g, 11.11 mmol) and 2,2-dimethoxypropane (2.72 mL, 22.22 mmol) in acetone (40 mL) was added *p*-TSA (0.07 g, 0.52 mmol). The reaction mixture was stirred for 40 min at rt, diluted with CH<sub>2</sub>Cl<sub>2</sub> (80 mL) and washed with satd aq NaHCO<sub>3</sub> soln (60 mL) and brine (60 mL). The organic layer was dried with Na<sub>2</sub>SO<sub>4</sub>, filtered, concentrated and the resulting residue was purified by chromatography (2:1 hexane–EtOAc) to afford **S12** (3.13 g, 91%) as a white amorphous solid: *R*<sub>f</sub> 0.58 (2:1 hexane–EtOAc); [ $\alpha$ ]<sub>D</sub> +127.0 (*c*, 0.3 CH<sub>2</sub>Cl<sub>2</sub>); <sup>1</sup>H NMR (400 MHz, CDCl<sub>3</sub>, δ<sub>H</sub>) 6.98 (d, 2H, *J* = 9.1 Hz, Ar-2,6), 6.84 (d, 2H, *J* = 9.1 Hz, Ar-3,5), 5.26 (br s, 1H, H-1), 4.27 (d, 1H, *J*<sub>2,3</sub> = 5.9 Hz, H-2), 4.02–3.99 (dd, 1H, *J*<sub>2,3</sub> = 5.9 Hz, *J*<sub>3,4</sub> = 7.2 Hz, H-3), 3.68 (s, 3H, ArOCH<sub>3</sub>), 3.62–3.53 (dd, 1H, *J*<sub>4,5</sub> = 9.1 Hz, *J*<sub>5,6</sub> = 6.0 Hz, H-5), 3.15–3.09 (dt, 1H, *J*<sub>3,4</sub> = 7.2 Hz, *J*<sub>4,5</sub> = 9.1 Hz, H-4), 1.41 (s, 3H, (CH<sub>3</sub>)<sub>2</sub>C), 1.29 (s, 3H, (CH<sub>3</sub>)<sub>2</sub>C), 1.04 (d, 3H, *J*<sub>5,6</sub> = 6.0 Hz, H-6); <sup>13</sup>C NMR (125 MHz, CDCl<sub>3</sub>, δ<sub>C</sub>) 154.3 (Ar), 149.3 (Ar), 118.1 (Ar x 2), 114.3 (Ar x 2), 108.2, 95.7, 77.8, 75.0, 73.0, 66.4, 55.1, 27.7, 26.1, 17.1. HRMS (ESI) calcd (M + Na)<sup>+</sup> C<sub>16</sub>H<sub>22</sub>O<sub>6</sub>Na: 333.1314. Found: 333.1313.

### ***p*-Methoxyphenyl 4-*O*-benzyl-2,3-*O*-isopropylidene- $\alpha$ -L-rhamnopyranoside (S13)**

To a solution of **S12** (2 g, 6.45 mmol) and BnBr (0.92 mL, 7.73 mmol) in DMF (15 mL) at 0 °C was added NaH (60% in mineral oil, 0.25 g, 10.3 mmol) portion-wise over 10 min. The reaction mixture was stirred for 4 h at rt before water (30 mL) was added. The solution was concentrated, diluted with CH<sub>2</sub>Cl<sub>2</sub> (100 mL), and washed with water (2 × 100 mL). The organic layer was dried (Na<sub>2</sub>SO<sub>4</sub>), filtered, concentrated, and the resulting crude product was purified by chromatography (5:1 hexane–EtOAc) to give **S13** (2.45 g, 95%) as a colorless oil: *R*<sub>f</sub> 0.50 (3:1 hexane–EtOAc); [ $\alpha$ ]<sub>D</sub> –43.6 (*c* 0.5, CH<sub>2</sub>Cl<sub>2</sub>); <sup>1</sup>H NMR (400 MHz, CDCl<sub>3</sub>, δ<sub>H</sub>) 7.40–

7.27 (m, 5H, Ar), 7.02–6.97 (m, 2H, Ar-2,6), 6.86–6.82 (m, 2H, Ar-3,5), 5.60 (d, 1H,  $J_{1,2} = 0.6$  Hz, H-1), 4.94, 4.66 (ABq, 2H,  $J = 12.0$  Hz, ArCH<sub>2</sub>), 4.45–4.42 (m, 1H, H-3), 4.37–4.36 (dd, 1H,  $J_{1,2} = 0.6$  Hz,  $J_{2,3} = 5.8$  Hz, H-2), 3.90–3.83 (dq, 1H,  $J_{4,5} = 9.4$  Hz,  $J_{5,6} = 6.0$  Hz, H-5), 3.78 (s, 3H, ArOCH<sub>3</sub>), 3.31–3.27 (dd, 1H,  $J_{3,4} = 7.0$  Hz,  $J_{4,5} = 9.4$  Hz H-4), 1.55 (s, 3H, (CH<sub>3</sub>)<sub>2</sub>C), 1.43 (s, 3H, (CH<sub>3</sub>)<sub>2</sub>C), 1.25 (d, 3H,  $J_{5,6} = 6.0$  Hz, H-6); <sup>13</sup>C NMR (125 MHz, CDCl<sub>3</sub>, δ<sub>C</sub>) 154.8 (Ar), 150.7 (Ar), 138.4 (Ar), 128.9 (Ar), 128.7 (Ar), 128.3 (Ar), 128.2 (Ar x 2), 127.9 (Ar x 2), 127.6 (Ar x 2), 109.4, 96.1, 81.0, 78.5, 76.0, 72.9, 65.3, 55.5, 27.9, 26.3, 17.7. HRMS (ESI) calcd (M + Na)<sup>+</sup> C<sub>23</sub>H<sub>28</sub>O<sub>6</sub>Na: 423.1784. Found: 423.1784.

#### ***p*-Methoxyphenyl 4-*O*-benzyl- $\alpha$ -L-rhamnopyranoside (S14)**

To a solution of **S13** (2 g, 5 mmol) in CH<sub>3</sub>OH (40 mL) was added *p*-TSA (76 mg, 0.49 mmol). The reaction mixture was stirred for 3 h at rt before it was neutralized with Et<sub>3</sub>N (1 mL) and concentrated. The crude product was purified by chromatography (2:1 EtOAc–hexane) to afford **S14** (1.26 g, 82%) as an amorphous solid: *R*<sub>f</sub> 0.55 (2:1 EtOAc–hexane); [ $\alpha$ ]<sub>D</sub> –50.4 (*c* 0.5, CH<sub>2</sub>Cl<sub>2</sub>); <sup>1</sup>H NMR (400 MHz, CDCl<sub>3</sub>, δ<sub>H</sub>) 7.38–7.27 (m, 5H, Ar), 6.99–6.97 (m, 2H, Ar-2,6), 6.85–6.82 (m, 2H, Ar-3,5), 5.40 (s, 1H, H-1), 4.79, 4.74 (ABq, 2H,  $J = 12.0$  Hz, ArCH<sub>2</sub>), 4.14–4.10 (m, 2H, H-2, H-3), 3.90–3.86 (dq, 1H,  $J_{4,5} = 9.4$  Hz,  $J_{5,6} = 6.1$  Hz, H-5), 3.78 (s, 3H, ArOCH<sub>3</sub>), 3.43 (app t, 1H,  $J_{3,4} = J_{4,5} = 9.4$  Hz, H-4), 2.50 (br s, 1H, OH-2), 2.38 (br s, 1H, OH-3), 1.33 (d, 3H,  $J_{5,6} = 6.1$  Hz, H-6); <sup>13</sup>C NMR (125 MHz, CDCl<sub>3</sub>, δ<sub>C</sub>) 154.8 (Ar), 150.1 (Ar), 138.1 (Ar), 128.6 (Ar x 2), 128.0 (Ar), 127.8 (Ar x 2), 117.5 (Ar x 2), 114.5 (Ar x 2), 98.0, 81.5, 71.2, 71.0, 67.8, 55.6, 18.0. HRMS (ESI) calcd (M + Na)<sup>+</sup> C<sub>20</sub>H<sub>24</sub>O<sub>6</sub>Na: 383.1471. Found: 383.1470.

#### ***p*-Methoxyphenyl 2,3-*O*-isopropylidene-4-*O*-methyl- $\alpha$ -L-rhamnopyranoside (S15)**

To a solution of compound **S12** (2 g, 6.45 mmol) and CH<sub>3</sub>I (0.49 mL, 7.73 mmol) in DMF (15 mL) was added NaH (60% in mineral oil, 0.25 g, 10.3 mmol) at 0 °C. The reaction mixture was then stirred for 4 h at rt before chilled water (30 mL) was added. The solution was concentrated, diluted with CH<sub>2</sub>Cl<sub>2</sub> (100 mL) and

washed with water (2 × 100 mL). The organic layer was dried (Na<sub>2</sub>SO<sub>4</sub>), filtered, concentrated and the resulting residue was purified by chromatography (5:1 hexane–EtOAc) to give **S15** (2.01 g, 96%) as a colorless oil: *R<sub>f</sub>* 0.56 (5:1 hexane–EtOAc); [α]<sub>D</sub> –77.1 (*c* 0.5, CHCl<sub>3</sub>); <sup>1</sup>H NMR (400 MHz, CDCl<sub>3</sub>, δ<sub>H</sub>) 7.02–6.98 (m, 2H, Ar-2,6), 6.87–6.82 (m, 2H, Ar-3,5), 5.60 (br s, 1H, H-1), 4.35–4.29 (m, 2H, H-2, H-3), 3.81–3.74 (m, 1H, H-5), 3.79 (s, 3H, OCH<sub>3</sub>), 3.57 (s, 3H, OCH<sub>3</sub>), 3.07 (dd, 1H, *J*<sub>3,4</sub> = 8.9 Hz, *J*<sub>4,5</sub> = 9.5 Hz, H-4), 1.60 (s, 3H, (CH<sub>3</sub>)<sub>2</sub>C), 1.42 (s, 3H, (CH<sub>3</sub>)<sub>2</sub>C), 1.25 (d, 3H, *J*<sub>5,6</sub> = 6.3 Hz, H-6); <sup>13</sup>C NMR (125.7 MHz, CDCl<sub>3</sub>, δ<sub>C</sub>) 155.2 (Ar), 150.5 (Ar), 118.0 (Ar x 2), 114.9 (Ar x 2), 109.6, 96.5, 83.8, 78.5, 76.3, 65.7, 59.7 (OCH<sub>3</sub>), 55.9 (OCH<sub>3</sub>), 28.3, 26.6, 18.0. HRMS (ESI) Calcd. for (M + Na)<sup>+</sup> C<sub>17</sub>H<sub>24</sub>NaO<sub>6</sub>: 347.1465. Found 347.1468.

### ***p*-Methoxyphenyl 3-*O*-*p*-methoxybenzyl-4-*O*-methyl-α-*L*-rhamnopyranoside (**S16**)**

To a solution of **S15** (2.4 g, 7.40 mmol) in 1:1 CH<sub>3</sub>OH–CH<sub>2</sub>Cl<sub>2</sub> (30 mL), *p*-TSA (100 mg) was added and the reaction mixture was stirred for 1 h at rt. The solution was then neutralized with Et<sub>3</sub>N (2 mL) and concentrated. The resulting diol (2 g, 7.01 mmol) was dissolved in toluene (60 mL) and *n*-Bu<sub>2</sub>SnO (1.75 g, 7.03 mmol) was added. The reaction mixture was stirred for 1 h at 120 °C, then cooled to 62 °C before PMBCl (1.20 g, 7.73 mmol) and *n*-Bu<sub>4</sub>NI (3.04 g, 8.28 mmol) were added. The reaction mixture was then stirred for additional 6 h at 62 °C and then concentrated. The resulting crude product was purified by chromatography (1:1 hexane–EtOAc) to give **S16** (2.33 g, 78%) as a colorless oil: *R<sub>f</sub>* 0.46 (1:1 hexane–EtOAc); [α]<sub>D</sub> –97.7 (*c* 1.0, CHCl<sub>3</sub>); <sup>1</sup>H NMR (500 MHz, CDCl<sub>3</sub>, δ<sub>H</sub>) 7.37–7.28 (m, 2H, Ar), 7.01–7.97 (m, 2H, Ar), 6.95–6.90 (m, 2H, Ar), 6.86–6.82 (m, 2H, Ar), 5.42 (d, 1H, *J*<sub>1,2</sub> = 1.7 Hz, H-1), 4.73, 4.69 (ABq, 2H, *J* = 11.1 Hz, ArCH<sub>2</sub>), 4.16 (dd, 1H, *J*<sub>1,2</sub> = 1.7 Hz, *J*<sub>2,3</sub> = 3.5 Hz, H-2), 3.91 (dd, 1H, *J*<sub>2,3</sub> = 3.5 Hz, *J*<sub>3,4</sub> = 9.1 Hz, H-3), 3.84 (s, 3H, OCH<sub>3</sub>), 3.79 (s, 3H, OCH<sub>3</sub>), 3.78–3.74 (m, 1H, H-5), 3.60 (s, 3H, OCH<sub>3</sub>), 3.21 (app t, 1H, *J*<sub>3,4</sub> = *J*<sub>4,5</sub> = 9.1 Hz, H-4), 2.60 (br s, 1H, OH-2), 1.28 (d, 3H, *J*<sub>5,6</sub> = 6.2 Hz, H-6); <sup>13</sup>C NMR (125.7 MHz, CDCl<sub>3</sub>, δ<sub>C</sub>) 159.7 (Ar), 155.1 (Ar), 150.5 (Ar), 130.4 (Ar), 129.7 (Ar x 2), 117.9 (Ar x 2), 114.9 (Ar x

2), 114.2 (Ar x 2), 98.2, 82.1, 79.5, 72.3, 68.9, 68.2, 61.3 (OCH<sub>3</sub>), 55.6 (OCH<sub>3</sub>), 55.5 (OCH<sub>3</sub>), 18.0. HRMS (ESI) Calcd. for (M + Na)<sup>+</sup> C<sub>22</sub>H<sub>28</sub>NaO<sub>7</sub>: 427.1727. Found 427.1726.

### ***p*-Tolyl 1-thio- $\alpha$ -L-rhamnopyranoside (S17)**

To a solution of 1,2,3,4-tetra-*O*-acetyl-L-rhamnopyranose (5 g, 15.05 mmol) and thiocresol (2.24 g, 18.05 mmol) in CH<sub>2</sub>Cl<sub>2</sub> (100 mL) at 0 °C was added BF<sub>3</sub>•OEt<sub>2</sub> (2.3 mL, 18.05 mmol) dropwise over 10 min. The reaction mixture was stirred for 7 h at 0 °C, diluted with CH<sub>2</sub>Cl<sub>2</sub> (50 mL) and washed with satd aq NaHCO<sub>3</sub> soln (100 mL) and brine (100 mL). The organic layer was dried with Na<sub>2</sub>SO<sub>4</sub>, filtered and concentrated. The resulting residue was dissolved in 1:1 CH<sub>2</sub>Cl<sub>2</sub>–CH<sub>3</sub>OH (100 mL) and 1M NaOCH<sub>3</sub> in CH<sub>3</sub>OH (5 mL) was added. After stirring for 2 h at rt, the reaction mixture was neutralized with Amberlite IR-120 H<sup>+</sup> resin, filtered, and concentrated. The resulting oil was purified by chromatography (10:1 CH<sub>2</sub>Cl<sub>2</sub>–CH<sub>3</sub>OH) to afford **S17** (3.2 g, 78%) as a white amorphous solid: *R*<sub>f</sub> 0.45 (10:1 CH<sub>2</sub>Cl<sub>2</sub>–CH<sub>3</sub>OH); [ $\alpha$ ]<sub>D</sub> +41.3 (*c*, 0.2 CH<sub>3</sub>OH); <sup>1</sup>H NMR (400 MHz, CD<sub>3</sub>OD,  $\delta$ <sub>H</sub>) 7.35–7.31 (m, 2H, Ar-2,6), 7.13–7.09 (m, 2H, Ar-3,5), 5.28 (d, 1H, *J*<sub>1,2</sub> = 1.2 Hz, H-1), 4.05–4.01 (m, 2H, H-2, H-5), 3.63 (dd, 1H, *J*<sub>2,3</sub> = 3.5 Hz, *J*<sub>3,4</sub> = 9.2 Hz, H-3), 3.43 (app t, 1H, *J*<sub>3,4</sub> = *J*<sub>4,5</sub> = 9.2 Hz, H-4), 2.30 (s, 3H, ArCH<sub>3</sub>), 1.25 (d, 3H, *J*<sub>5,6</sub> = 6.5 Hz, H-6); <sup>13</sup>C NMR (125 MHz, CD<sub>3</sub>OD,  $\delta$ <sub>C</sub>) 138.5 (Ar), 133.1 (Ar x 2), 132.1 (Ar), 130.6 (Ar x 2), 90.4, 74.0, 73.6, 72.8, 70.7, 20.9, 17.7. HRMS (ESI) calcd (M + Na)<sup>+</sup> C<sub>13</sub>H<sub>18</sub>O<sub>4</sub>SNa: 293.0818. Found: 293.0818.

### ***p*-Tolyl 2,3-*O*-isopropylidene-1-thio- $\alpha$ -L-rhamnopyranoside (S18)**

To a solution of **S17** (2.5 g, 9.25 mmol) and 2,2-dimethoxypropane (2.09 mL, 17.05 mmol) in acetone (30 mL) was added *p*-TSA (0.13 g, 0.9 mmol). The reaction mixture was stirred for 30 min at rt, diluted with CH<sub>2</sub>Cl<sub>2</sub> (100 mL) and washed with satd aq NaHCO<sub>3</sub> soln (60 mL) and brine (60 mL). The organic layer was separated, dried with Na<sub>2</sub>SO<sub>4</sub>, filtered, concentrated and the resulting residue was purified by chromatography (2:1 hexane–EtOAc) to afford **S18** (2.75 g, 96%) as a white amorphous solid: *R*<sub>f</sub> 0.41 (2:1

hexane–EtOAc);  $[\alpha]_D +74$  (*c*, 1.8 CH<sub>2</sub>Cl<sub>2</sub>); <sup>1</sup>H NMR (400 MHz, CDCl<sub>3</sub>, δ<sub>H</sub>) 7.38–7.35 (m, 2H, Ar-2,6), 7.14–7.12 (d, 2H, *J* = 7.9 Hz, Ar-3,5), 5.67 (d, 1H, *J*<sub>1,2</sub> = 0.4 Hz, H-1), 4.35–4.34 (dd, 1H, *J*<sub>1,2</sub> = 0.4 Hz, *J*<sub>2,3</sub> = 5.6 Hz, H-2), 4.12–4.06 (m, 2H, H-3, H-4), 3.45 (dq, 1H, *J*<sub>4,5</sub> = 9.8 Hz, *J*<sub>5,6</sub> = 6.4 Hz, H-5), 2.34 (s, 3H, ArCH<sub>3</sub>), 1.53 (s, 3H, (CH<sub>3</sub>)<sub>2</sub>C), 1.37 (s, 3H, (CH<sub>3</sub>)<sub>2</sub>C), 1.25 (d, 3H, *J*<sub>5,6</sub> = 6.4 Hz, H-6); <sup>13</sup>C NMR (125 MHz, CDCl<sub>3</sub>, δ<sub>C</sub>) 137.8 (Ar), 132.4 (Ar x 2), 129.7 (Ar x 2), 129.4 (Ar), 109.6, 84.0, 78.3, 76.4, 75.1, 66.8, 28.1, 26.3, 21.0, 17.0. HRMS (ESI) calcd (M + Na)<sup>+</sup> C<sub>16</sub>H<sub>22</sub>O<sub>4</sub>SNa: 333.1137. Found: 333.1136.

### ***p*-Tolyl 4-*O*-benzyl-1-thio- $\alpha$ -L-rhamnopyranoside (S19)**

To a solution of **S18** (2 g, 6.45 mmol) and BnBr (0.92 mL, 7.73 mmol) in DMF (15 mL), NaH (60% in mineral oil, 0.25 g, 10.3 mmol) was added portion-wise at 0 °C over 2 min. The reaction mixture was stirred for 1 h at rt before water (30 mL) was added. The solution was concentrated, diluted with CH<sub>2</sub>Cl<sub>2</sub> (60 mL) and washed with water (2 × 50 mL). The organic layer was separated, dried (Na<sub>2</sub>SO<sub>4</sub>), filtered, concentrated and the resulting residue was carried to the next step without further purification. To a solution of the residue in 3:1 CH<sub>3</sub>OH–CH<sub>2</sub>Cl<sub>2</sub> (20 mL) was added *p*-TSA (40 mg, 20% w/w) and the reaction mixture was stirred for an additional 3 h. The reaction mixture was then neutralized with Et<sub>3</sub>N (1 mL). The solution was concentrated, and the resulting residue was purified by chromatography (2:1 EtOAc–hexane) to give **S19** (1.88 g, 81%) as an amorphous solid: *R*<sub>f</sub> 0.36 (2:1 EtOAc–hexane);  $[\alpha]_D -152.7$  (*c*, 1.3 CH<sub>2</sub>Cl<sub>2</sub>); <sup>1</sup>H NMR (400 MHz, CDCl<sub>3</sub>, δ<sub>H</sub>) 7.41–7.30 (m, 7H, Ar), 7.12 (d, 2H, *J* = 7.9 Hz, Ar), 5.40 (d, 1H, *J*<sub>1,2</sub> = 1.5 Hz, H-1), 4.78, 4.75 (ABq, 2H, *J* = 11.0 Hz, ArCH<sub>2</sub>), 4.25 (dq, 1H, *J*<sub>4,5</sub> = 9.4 Hz, *J*<sub>5,6</sub> = 6.2 Hz, H-5), 4.18 (ddd, 1H, *J*<sub>1,2</sub> = 1.5 Hz, *J*<sub>2,3</sub> = 3.4 Hz, *J*<sub>2,OH-2</sub> = 3.9 Hz, H-2), 3.96 (ddd, 1H, *J*<sub>2,3</sub> = 3.4 Hz, *J*<sub>3,4</sub> = 9.4 Hz, *J*<sub>3,OH-3</sub> = 5.3 Hz, H-3), 3.44 (app t, 1H, *J*<sub>3,4</sub> = *J*<sub>4,5</sub> = 9.4 Hz, H-4), 2.87 (d, 1H, *J*<sub>2,OH-2</sub> = 3.9 Hz, OH-2), 2.63 (d, 1H, *J*<sub>3,OH-3</sub> = 5.3 Hz, OH-3), 2.33 (s, 3H, ArCH<sub>3</sub>), 1.36 (d, 1H, *J*<sub>5,6</sub> = 6.2 Hz, H-6); <sup>13</sup>C NMR (125 MHz, CDCl<sub>3</sub>, δ<sub>C</sub>) 138.1 (Ar), 137.6 (Ar), 132.0 (Ar x 2), 130.1 (Ar), 129.8 (Ar), 128.6 (Ar x 2), 128.0 (Ar x 2), 127.9 (Ar x 2), 87.7,



81.8, 75.0, 72.5, 71.8, 68.5, 21.0, 17.8. HRMS (ESI) calcd (M + Na)<sup>+</sup> C<sub>20</sub>H<sub>24</sub>O<sub>4</sub>SNa: 383.1288. Found: 383.1291.

### ***p*-Tolyl 4-*O*-benzyl-3-*O*-*p*-methoxybenzyl-1-thio- $\alpha$ -L-rhamnopyranoside (S20)**

Diol **S19** (1 g, 2.77 mmol) was dissolved in toluene (60 mL) and *n*-Bu<sub>2</sub>SnO (0.7 g, 2.76 mmol) was added. The reaction mixture was stirred at 120 °C for 1 h and then it was cooled to 62 °C before PMBCl (0.49 g, 3.05 mmol) and *n*-Bu<sub>4</sub>NI (2.40 g, 6.52 mmol) were added. The reaction mixture was stirred at 62 °C for additional 6 h and then concentrated. The resulting crude product was purified by chromatography (2:1 hexane–EtOAc) to give **S20** (1.14 g, 86%) as an amorphous solid: *R*<sub>f</sub> 0.42 (2:1 hexane–EtOAc); [ $\alpha$ ]<sub>D</sub> –173.1 (*c* 2.0, CHCl<sub>3</sub>); <sup>1</sup>H NMR (400 MHz, CDCl<sub>3</sub>,  $\delta$ <sub>H</sub>) 7.37–7.28 (m, 9H, Ar), 7.12–7.01 (m, 2H, Ar-2,6), 6.90–6.87 (m, 2H, Ar-3,5), 5.45 (d, 1H, *J*<sub>1,2</sub> = 1.7 Hz, H-1), 4.89, 4.64 (ABq, 2H, *J* = 11.0 Hz, ArCH<sub>2</sub>), 4.65, 4.63 (ABq, 2H, *J* = 11.0 Hz, ArCH<sub>2</sub>), 4.23–4.17 (m, 2H, H-2, H-5), 3.85 (dd, 1H, *J*<sub>2,3</sub> = 3.3 Hz, *J*<sub>3,4</sub> = 9.5 Hz, H-3), 3.82 (s, 3H, OCH<sub>3</sub>), 3.50 (app t, 1H, *J*<sub>3,4</sub> = *J*<sub>4,5</sub> = 9.5 Hz, H-4), 2.67 (br s, 1H, OH-2), 2.33 (s, 3H, ArCH<sub>3</sub>), 1.30 (d, 3H, *J*<sub>5,6</sub> = 6.4 Hz, H-6); <sup>13</sup>C NMR (125.7 MHz, CDCl<sub>3</sub>,  $\delta$ <sub>C</sub>) 159.5 (Ar), 138.4 (Ar), 137.6 (Ar), 132.1 (Ar x 2), 130.3 (Ar), 129.8 (Ar x 2), 129.8 (Ar), 129.7 (Ar x 2), 128.4 (Ar x 2), 128.0 (Ar x 2), 127.8 (Ar), 114.0 (Ar x 2), 87.3, 80.1, 79.8, 75.4, 71.9, 70.1, 68.7, 55.3 (OCH<sub>3</sub>), 21.1, 17.8. HRMS (ESI) Calcd. for (M + Na)<sup>+</sup> C<sub>28</sub>H<sub>32</sub>NaO<sub>5</sub>S: 503.1863. Found 503.1865.

### ***p*-Tolyl 2,3,4-tri-*O*-acetyl-1-thio- $\beta$ -L-fucopyranoside (S21)**

To a solution of L-fucose (5 g, 30.48 mmol) in pyridine (25 mL) at 0 °C was added Ac<sub>2</sub>O (20 mL). The reaction mixture was stirred for 7 h at rt before water (100 mL) was added. The solution was diluted with CH<sub>2</sub>Cl<sub>2</sub> (150 mL) and washed with 1M HCl soln (100 mL x 2), satd aq NaHCO<sub>3</sub> soln (100 mL), water (100 mL x 2), and brine (100 mL). The organic layer was dried with Na<sub>2</sub>SO<sub>4</sub>, filtered and the resulting oil was purified by chromatography (3:1 hexane–EtOAc) to afford **S21** (10.98 g, 91%) as colorless oil: *R*<sub>f</sub> 0.55 (3:1

hexane–EtOAc);  $[\alpha]_D -113.7$  (*c* 0.6, CHCl<sub>3</sub>) <sup>1</sup>H NMR (400 MHz, CDCl<sub>3</sub>,  $\delta_H$ ) 7.40 (d, 2H, *J* = 8.2 Hz, Ar-2,6), 7.11 (d, 2H, *J* = 8.2 Hz, Ar-3,5), 5.23 (dd, 1H, *J*<sub>3,4</sub> = 3.1 Hz, *J*<sub>4,5</sub> = 2.8 Hz, H-4), 5.19 (app t, 1H, *J*<sub>1,2</sub> = *J*<sub>2,3</sub> = 9.9 Hz, H-2), 5.02 (dd, 1H, *J*<sub>2,3</sub> = 9.9 Hz, *J*<sub>3,4</sub> = 3.1 Hz, H-3), 4.63 (d, 1H, *J*<sub>1,2</sub> = 9.9 Hz, H-1), 3.79 (dq, 1H, *J*<sub>4,5</sub> = 2.8 Hz, *J*<sub>5,6</sub> = 6.3 Hz, H-5), 2.33 (s, 3H, ArCH<sub>3</sub>), 2.13 (s, 3H, CH<sub>3</sub>CO), 2.08 (s, 3H, CH<sub>3</sub>CO), 1.96 (s, 3H, CH<sub>3</sub>CO), 1.22 (d, 3H, *J*<sub>5,6</sub> = 6.3 Hz, H-6); <sup>13</sup>C NMR (125 MHz, CDCl<sub>3</sub>,  $\delta_C$ ) 170.6 (C=O), 170.1 (C=O), 169.5 (C=O), 138.2 (Ar), 132.9 (Ar x 2), 129.6 (Ar x 2), 129.1 (Ar), 86.9, 73.1, 72.5, 70.4, 67.4, 21.2, 20.9, 20.7, 20.6, 16.5. HRMS (ESI) calcd (M + Na)<sup>+</sup> C<sub>19</sub>H<sub>24</sub>O<sub>7</sub>SNa: 419.1141. Found: 419.1139.

### ***p*-Tolyl 3,4-*O*-isopropylidene-1-thio- $\beta$ -L-fucopyranoside (S22)**

To a solution of **S21** (5 g, 12.62 mmol) in 1:1 CH<sub>2</sub>Cl<sub>2</sub>–CH<sub>3</sub>OH (50 mL), 1M NaOCH<sub>3</sub> in CH<sub>3</sub>OH (5 mL) was added. After stirring for 2 h at rt, the reaction mixture was neutralized with Amberlite IR-120 H<sup>+</sup> resin and filtered. The filtrate was concentrated, and the resulting oil and was dissolved in acetone (50 mL) to which 2,2-dimethoxypropane (4.52 mL, 36.92 mmol) and *p*-TSA (200 mg) were added. The reaction mixture was stirred for 40 min at rt, neutralized with Et<sub>3</sub>N (3 mL), diluted with CH<sub>2</sub>Cl<sub>2</sub> (100 mL) and washed with satd. aq. NaHCO<sub>3</sub> soln. (100 mL) and brine (100 mL). The organic layer was dried (Na<sub>2</sub>SO<sub>4</sub>), filtered, concentrated and the resulting residue was purified by chromatography (1:1 hexane–EtOAc) to afford **S22** (3.5 g, 90%) as an amorphous solid: *R*<sub>f</sub> 0.32 (1:1 hexane–EtOAc);  $[\alpha]_D -81.9$  (*c* 1.0, CHCl<sub>3</sub>); <sup>1</sup>H NMR (500 MHz, CDCl<sub>3</sub>,  $\delta_H$ ) 7.46–7.44 (m, 2H, Ar-2,6), 7.14–7.12 (m, 2H, Ar-3,5), 4.36 (d, 1H, *J*<sub>1,2</sub> = 10.2 Hz, H-1), 4.06–4.02 (m, 2H, H-3, H-4), 3.85 (dq, 1H, *J*<sub>4,5</sub> = 2.3 Hz, *J*<sub>5,6</sub> = 6.3 Hz, H-5), 3.51 (ddd, 1H, *J*<sub>1,2</sub> = 10.2 Hz, *J*<sub>2,3</sub> = 8.4 Hz, *J*<sub>2,OH-2</sub> = 2.2 Hz, H-2), 2.45 (d, 1H, *J*<sub>OH-2,2</sub> = 2.2 Hz, OH-2), 2.32 (s, 3H, ArCH<sub>3</sub>), 1.44 (s, 3H, (CH<sub>3</sub>)<sub>2</sub>C), 1.42 (s, 3H, (CH<sub>3</sub>)<sub>2</sub>C), 1.35 (d, 3H, *J*<sub>5,6</sub> = 6.3 Hz, H-6); <sup>13</sup>C NMR (125 MHz, CDCl<sub>3</sub>,  $\delta_C$ ) 138.3 (Ar), 133.2 (Ar x 2), 129.7 (Ar x 2), 128.3 (Ar), 109.8, 88.2, 79.1, 76.4, 72.8, 71.3, 28.1, 26.4, 21.1, 17.0. HRMS (ESI) Calcd. for (M + Na) C<sub>16</sub>H<sub>22</sub>O<sub>4</sub>NaS: 333.1131. Found 333.1135.

### ***p*-Tolyl 2-*O*-methyl-1-thio- $\beta$ -L-fucopyranoside (S23)**

To a solution of **S4** (1.5 g, 4.62 mmol) in 3:1 CH<sub>3</sub>OH–CH<sub>2</sub>Cl<sub>2</sub> (20 mL) was added *p*-TSA (300 mg, 20% w/w) and the reaction mixture was stirred for 4 h, and then neutralized with Et<sub>3</sub>N (2 mL). The solution was concentrated and the resulting residue was purified by chromatography (1:2 hexane–EtOAc) to give **S23** (1.1 g, 80%) as an amorphous solid: *R<sub>f</sub>* 0.3 (1:2 hexane–EtOAc); [ $\alpha$ ]<sub>D</sub> –25.9 (*c* 1.2, CHCl<sub>3</sub>); <sup>1</sup>H NMR (500 MHz, CDCl<sub>3</sub>,  $\delta$ <sub>H</sub>) 7.44 (d, 2H, *J* = 8.1 Hz, Ar-2,6), 7.10 (d, 2H, *J* = 8.1 Hz, Ar-3,5), 4.43 (d, 1H, *J*<sub>1,2</sub> = 9.6 Hz, H-1), 3.74–3.73 (m, 1H, H-4), 3.64 (s, 3H, OCH<sub>3</sub>), 3.61–3.57 (m, 2H, H-3, H-5), 3.22 (app t, 1H, *J*<sub>1,2</sub> = *J*<sub>2,3</sub> = 9.6 Hz, H-2), 2.78 (br s, 1H, OH), 2.31 (s, 3H, ArCH<sub>3</sub>), 2.20 (br s, 1H, OH), 1.32 (d, 3H, *J*<sub>5,6</sub> = 6.5 Hz, H-6); <sup>13</sup>C NMR (125.7 MHz, CDCl<sub>3</sub>,  $\delta$ <sub>C</sub>) 137.8 (Ar), 132.5 (Ar x 2), 129.8 (Ar), 129.6 (Ar x 2), 87.5, 80.0, 75.5, 74.4, 71.9, 61.2 (OCH<sub>3</sub>), 21.1, 16.6. (ESI) Calcd. for (M + Na)<sup>+</sup> C<sub>14</sub>H<sub>20</sub>O<sub>4</sub>SNa: 307.0980. Found 307.0980.

### ***p*-Tolyl 3-*O*-*p*-methoxybenzyl-2-*O*-methyl-1-thio- $\beta$ -L-fucopyranoside (S24)**

Diol **S23** (1 g, 3.50 mmol) was dissolved in toluene (30 mL) and *n*-Bu<sub>2</sub>SnO (0.87 g, 3.51 mmol) was added. The reaction mixture was stirred for 1 h at 120 °C and then it was cooled to 62 °C before PMBCl (0.60 g, 3.86 mmol) and *n*-Bu<sub>4</sub>Ni (1.43 g, 3.86 mmol) were added. The reaction mixture was stirred at 62 °C for additional 5 h and then concentrated. The resulting was purified by chromatography (2:1 hexane–EtOAc) to give **S24** (1.17 g, 83%) as an amorphous solid: *R<sub>f</sub>* 0.35 (2:1 hexane–EtOAc); [ $\alpha$ ]<sub>D</sub> +1.6 (*c* 1.1, CHCl<sub>3</sub>); <sup>1</sup>H NMR (400 MHz, CDCl<sub>3</sub>,  $\delta$ <sub>H</sub>) 7.48–7.45 (m, 2H, Ar), 7.30–7.27 (m, 2H, Ar), 7.11–7.09 (m, 2H, Ar), 6.90–6.86 (m, 2H, Ar), 4.64 (br s, 2H, ArCH<sub>2</sub>), 4.41 (d, 1H, *J*<sub>1,2</sub> = 9.8 Hz, H-1), 3.80 (s, 3H, OCH<sub>3</sub>), 3.75–3.74 (m, 1H, H-4), 3.60 (s, 3H, OCH<sub>3</sub>), 3.51 (dq, 1H, *J*<sub>4,5</sub> = 2.7 Hz, *J*<sub>5,6</sub> = 6.4 Hz, H-5), 3.44 (dd, 1H, *J*<sub>2,3</sub> = 9.5 Hz, *J*<sub>3,4</sub> = 2.7 Hz, H-3), 3.32 (dd, 1H, *J*<sub>1,2</sub> = 9.8 Hz, *J*<sub>2,3</sub> = 9.5 Hz, H-2), 2.32 (s, 3H, ArCH<sub>3</sub>), 2.23 (s, 1H, OH-4), 1.34 (d, 3H, *J*<sub>5,6</sub> = 6.4 Hz, H-6); <sup>13</sup>C NMR (125.7 MHz, CDCl<sub>3</sub>,  $\delta$ <sub>C</sub>) 159.4 (Ar), 137.6 (Ar), 132.7 (Ar x 2), 129.9 (Ar), 129.8 (Ar), 129.4(7) (Ar x 2), 129.4(5) (Ar x 2), 113.9 (Ar x 2), 87.5, 82.5, 78.4, 74.1, 71.8, 69.5, 61.2

(OCH<sub>3</sub>), 55.3 (OCH<sub>3</sub>), 21.1, 16.7. HRMS (ESI) Calcd. for (M + Na)<sup>+</sup> C<sub>22</sub>H<sub>28</sub>NaO<sub>5</sub>S: 427.1555. Found 427.1549.

***p*-Methoxyphenyl 2-*O*-acetyl-4-*O*-benzyl-3-*O*-*p*-methoxybenzyl- $\alpha$ -L-rhamnopyranosyl-(1 $\rightarrow$ 3)-4-*O*-benzyl-2-*O*-methyl- $\alpha$ -L-rhamnopyranoside (S25)**

To a solution of donor **S3** (0.95 g, 1.82 mmol) and acceptor **S2** (0.82 g, 2.2 mmol) in CH<sub>2</sub>Cl<sub>2</sub> (30 mL) was added crushed 4 Å molecular sieves (300 mg). After the mixture was stirred at rt for 30 min, it was cooled to -20 °C, and then NIS (416 mg, 1.85 mmol) and AgOTf (123 mg, 0.48 mmol) were added. The reaction mixture was stirred for an additional 30 min at -20 °C before the addition of Et<sub>3</sub>N (1 mL). The solution was concentrated to a crude residue that was purified by chromatography (3:1 hexane–EtOAc) to give **S25** (1.13 g, 81%) as an amorphous solid: *R*<sub>f</sub> 0.50 (2:1 hexane–EtOAc); [ $\alpha$ ]<sub>D</sub> -25.0 (*c* 1.0, CHCl<sub>3</sub>); <sup>1</sup>H NMR (500 MHz, CDCl<sub>3</sub>,  $\delta$ <sub>H</sub>) 7.36–7.27 (m, 10 H, Ar), 7.21–7.19 (m, 2H, Ar), 6.97–6.96 (m, 2H, Ar), 6.83–6.78 (m, 4H, Ar), 5.52 (dd, 1H, *J*<sub>1',2'</sub> = 1.8 Hz, *J*<sub>2',3'</sub> = 3.3 Hz, H-2'), 5.40 (d, 1H, *J*<sub>1,2</sub> = 1.9 Hz, H-1), 5.09 (d, 1H, *J*<sub>1',2'</sub> = 1.8 Hz, H-1'), 4.92, 4.40 (ABq, 2H, *J* = 11.0 Hz, ArCH<sub>2</sub>), 4.80, 4.61 (ABq, 2H, *J* = 11.0 Hz, ArCH<sub>2</sub>), 4.59 (ABq, 2H, *J* = 10.5 Hz, ArCH<sub>2</sub>), 4.22 (dd, 1H, *J*<sub>2,3</sub> = 3.3 Hz, *J*<sub>3,4</sub> = 9.5 Hz, H-3), 4.00–3.95 (m, 2H, H-3', H-5'), 3.81–3.78 (m, 1H, H-5), 3.76 (s, 3H, OCH<sub>3</sub>), 3.74 (s, 3H, OCH<sub>3</sub>), 3.71 (dd, 1H, *J*<sub>1,2</sub> = 1.9 Hz, *J*<sub>2,3</sub> = 3.3 Hz, H-2), 3.52 (app t, 1H, *J*<sub>3,4</sub> = *J*<sub>4,5</sub> = 9.5 Hz, H-4), 3.49 (s, 3H, OCH<sub>3</sub>), 3.44 (app t, 1H, *J*<sub>3',4'</sub> = *J*<sub>4',5'</sub> = 9.4 Hz, H-4'), 2.11 (s, 3H, CH<sub>3</sub>CO), 1.35 (d, 3H, *J*<sub>5',6'</sub> = 6.0 Hz, H-6'), 1.24 (d, 1H, *J*<sub>5,6</sub> = 6.0 Hz, H-6); <sup>13</sup>C NMR (125.7 MHz, CDCl<sub>3</sub>,  $\delta$ <sub>C</sub>) 170.1 (C=O), 159.3 (Ar), 154.9 (Ar x 2), 150.4 (Ar x 2), 138.6 (Ar), 138.1 (Ar), 130.1 (Ar), 129.7 (Ar x 2), 128.5 (Ar x 2), 128.4 (Ar x 2), 128.0 (Ar x 2), 127.8 (Ar), 127.7 (Ar), 117.5 (Ar x 2), 114.6 (Ar x 2), 113.8 (Ar x 2), 99.8, 95.6, 80.3, 80.1, 80.0, 78.8, 77.6, 75.4, 75.4, 71.4, 69.2, 68.7, 68.5, 58.9 (OCH<sub>3</sub>), 55.7 (OCH<sub>3</sub>), 55.2 (OCH<sub>3</sub>), 21.1, 18.2, 18.0. HRMS (ESI) Calcd. for (M + Na)<sup>+</sup> C<sub>44</sub>H<sub>52</sub>NaO<sub>12</sub>: 795.3351. Found 795.3343.

***p*-Methoxyphenyl 4-*O*-benzyl-2-*O*-methyl- $\alpha$ -L-rhamnopyranosyl-(1 $\rightarrow$ 3)-4-*O*-benzyl-2-*O*-methyl- $\alpha$ -L-rhamnopyranoside (S26)**

To a solution of **S25** (0.5 g, 0.65 mmol) in 1:1 CH<sub>3</sub>OH–CH<sub>2</sub>Cl<sub>2</sub> (15 mL), 1M NaOCH<sub>3</sub> (0.5 mL) was added and the reaction mixture was stirred for 1 h at rt. The solution was then neutralized with Amberlite IR-120 H<sup>+</sup> resin, filtered and concentrated. The resulting residue was dissolved in DMF (5 mL) and CH<sub>3</sub>I (0.1 mL, 0.9 mmol) was added and the solution was cooled to 0 °C. To this solution, NaH (60% in mineral oil, 30 mg, 1.18 mmol) was added and then the reaction mixture was stirred for 1 h at rt. Chilled water (20 mL) was then added and the mixture was diluted with CH<sub>2</sub>Cl<sub>2</sub> (40 mL), washed with water (2 x 30 mL), 1M HCl soln (2 x 30 mL) and brine (30 mL). The organic layer was separated, dried (Na<sub>2</sub>SO<sub>4</sub>), filtered and concentrated. The resulting residue was purified by chromatography (4:1 hexane–EtOAc) to give a syrup. The syrup was dissolved in CH<sub>2</sub>Cl<sub>2</sub> (20 mL) and TFA (1 mL, 5% v/v) was added dropwise over 2 min after the solution was cooled to 0 °C. The reaction mixture was stirred for additional 30 min at 0 °C, before the addition of Et<sub>3</sub>N (3 mL) and concentration. The resulting crude product was purified by chromatography (2:1 hexane–EtOAc) to give **S26** (0.35 g, 87%) as a colorless oil: *R*<sub>f</sub> 0.35 (3:1 hexane–EtOAc); [ $\alpha$ ]<sub>D</sub> –6.9 (*c* 0.5, CHCl<sub>3</sub>); <sup>1</sup>H NMR (500 MHz, CDCl<sub>3</sub>,  $\delta$ <sub>H</sub>) 7.41–7.26 (m, 10H, Ar), 7.03–7.00 (m, 2H, Ar-2,6), 6.86–6.83 (m, 2H, Ar-3,5), 5.43 (d, 1H, *J*<sub>1,2</sub> = 1.9 Hz, H-1), 5.18 (d, 1H, *J*<sub>1',2'</sub> = 1.8 Hz, H-1'), 4.93, 4.82 (ABq, 2H, *J* = 11.5 Hz, ArCH<sub>2</sub>), 4.71, 4.71 (ABq, 2H, *J* = 11.2 Hz, ArCH<sub>2</sub>), 4.26 (dd, 1H, *J*<sub>2,3</sub> = 3.2 Hz, *J*<sub>3,4</sub> = 9.6 Hz, H-3), 4.03 (dd, 1H, *J*<sub>2',3'</sub> = 3.4 Hz, *J*<sub>3',4'</sub> = 9.5 Hz, H-3'), 3.91–3.84 (m, 2H, H-5, H-5'), 3.78 (s, 3H, OCH<sub>3</sub>), 3.73 (dd, 1H, *J*<sub>1,2</sub> = 2.0 Hz, *J*<sub>2,3</sub> = 3.2 Hz, H-2), 3.58 (app t, 1H, *J*<sub>3,4</sub> = *J*<sub>4,5</sub> = 9.6 Hz, H-4), 3.54 (s, 3H, OCH<sub>3</sub>), 3.49 (dd, 1H, *J*<sub>1',2'</sub> = 1.5 Hz, *J*<sub>2',3'</sub> = 3.7 Hz, H-2'), 3.31 (app t, 1H, *J*<sub>3',4'</sub> = *J*<sub>4',5'</sub> = 9.5 Hz, H-4'), 3.23 (s, 3H, OCH<sub>3</sub>), 1.37 (d, 3H, *J*<sub>5',6'</sub> = 6.4 Hz, H-6'), 1.29 (d, 3H, *J*<sub>5,6</sub> = 6.5 Hz, H-6); <sup>13</sup>C NMR (125.7 MHz, CDCl<sub>3</sub>,  $\delta$ <sub>C</sub>) 154.9 (Ar), 150.4 (Ar), 138.6 (Ar), 138.4 (Ar), 128.4 (Ar x 2), 128.0 (Ar x 2), 127.8 (Ar x 2), 127.7 (Ar x 2), 127.1 (Ar x 2), 117.6 (Ar x 2), 114.7 (Ar x 2), 98.7, 95.8, 82.1, 81.0, 80.6, 80.4, 78.7, 75.1, 71.6, 68.8, 67.9, 59.1 (OCH<sub>3</sub>), 58.6 (OCH<sub>3</sub>), 55.7 (OCH<sub>3</sub>), 18.2, 18.0. HRMS (ESI) Calcd. for (M + Na)<sup>+</sup> C<sub>35</sub>H<sub>44</sub>NaO<sub>10</sub>: 647.2827. Found 647.2823.

***p*-Methoxyphenyl 3,4-*O*-isopropylidene-2-*O*-methyl- $\alpha$ -L-fucopyranosyl-(1 $\rightarrow$ 3)-4-*O*-benzyl-2-*O*-methyl- $\alpha$ -L-rhamnopyranosyl-(1 $\rightarrow$ 3)-4-*O*-benzyl-2-*O*-methyl- $\alpha$ -L-rhamnopyranoside (S27)**

Two solutions were prepared. Solution A was prepared by dissolving donor **S4** (50 mg, 0.15 mmol) in CH<sub>2</sub>Cl<sub>2</sub> (10 mL) containing crushed 4 Å molecular sieves (50 mg). Solution B was prepared by dissolving acceptor **S26** (80 mg, 0.13 mmol) in CH<sub>2</sub>Cl<sub>2</sub> (15 mL) and crushed 4 Å molecular sieves (100 mg) was added. Both solutions A and B were stirred for 30 min at rt and then solution B was cooled to -40 °C before NIS (36 mg, 0.16 mmol) and AgOTf (10.3 mg, 0.04 mmol) were added. Solution A was then added dropwise over 5 min to solution B while stirring. The reaction mixture was stirred for additional 30 min at -40 °C before Et<sub>3</sub>N (1 mL) was added. The solution was filtered, concentrated and the resulting residue was purified by chromatography (2:1 hexane–EtOAc) to give **S27** (86 mg, 80%) as a colorless oil: *R*<sub>f</sub> 0.40 (2:1 hexane–EtOAc); [ $\alpha$ ]<sub>D</sub> +0.8 (*c* 0.4, CHCl<sub>3</sub>); <sup>1</sup>H NMR (500 MHz, CDCl<sub>3</sub>,  $\delta$ <sub>H</sub>) 7.39–7.55 (m, 10H, Ar), 7.00–6.89 (m, 2H, Ar-2,6), 6.83–6.81 (m, 2H, Ar-3,5), 5.42 (d, 1H, *J*<sub>1,2</sub> = 1.8 Hz, H-1), 5.17 (d, 1H, *J*<sub>1',2'</sub> = 1.8 Hz, H-1'), 5.14 (d, 1H, *J*<sub>1'',2''</sub> = 3.2 Hz, H-1''), 5.15, 4.53 (ABq, 2H, *J* = 10.75 Hz, ArCH<sub>2</sub>), 4.84, 4.64 (ABq, 2H, *J* = 11.0 Hz, ArCH<sub>2</sub>), 4.39 (dq, 1H, *J*<sub>4'',5''</sub> = 2.7 Hz, *J*<sub>5'',6''</sub> = 6.3 Hz, H-5''), 4.32 (dd, 1H, *J*<sub>2'',3''</sub> = 8.9 Hz, *J*<sub>3'',4''</sub> = 2.8 Hz, H-3''), 4.21 (dd, 1H, *J*<sub>2,3</sub> = 3.2 Hz, *J*<sub>3,4</sub> = 9.6 Hz, H-3), 4.06 (dd, 1H, *J*<sub>3'',4''</sub> = 2.8 Hz, *J*<sub>4'',5''</sub> = 2.7 Hz, H-4''), 4.02 (dd, 1H, *J*<sub>2',3'</sub> = 3.2 Hz, *J*<sub>3',4'</sub> = 9.6 Hz, H-3'), 3.95 (dq, 1H, *J*<sub>4',5'</sub> = 9.6 Hz, *J*<sub>5',6'</sub> = 6.2 Hz, H-5'), 3.82 (dq, 1H, *J*<sub>4,5</sub> = 9.5 Hz, *J*<sub>5,6</sub> = 6.2 Hz, H-5), 3.77 (s, 3H, OCH<sub>3</sub>), 3.75–3.74 (m, 1H, H-2), 3.72–3.71 (m, 1H, H-2'), 3.56–3.52 (m, 1H, H-4), 3.51 (s, 3H, OCH<sub>3</sub>), 3.56–3.45 (m, 1H, H-4'), 3.37 (s, 3H, OCH<sub>3</sub>), 3.33 (dd, 1H, *J*<sub>1'',2''</sub> = 3.2 Hz, *J*<sub>2'',3''</sub> = 8.9 Hz, H-2''), 3.24 (s, 3H, OCH<sub>3</sub>), 1.54 (s, 3H, (CH<sub>3</sub>)<sub>2</sub>C), 1.35–1.34 (m, 6H, (CH<sub>3</sub>)<sub>2</sub>C, H-6'), 1.29 (d, 3H, *J*<sub>5'',6''</sub> = 6.3 Hz, H-6''), 1.27 (d, 3H, *J*<sub>5,6</sub> = 6.2 Hz, H-6); <sup>13</sup>C NMR (125.7 MHz, CDCl<sub>3</sub>,  $\delta$ <sub>C</sub>) 154.9 (Ar), 150.5 (Ar), 139.0 (Ar), 138.3 (Ar), 128.4 (Ar x 2), 128.2 (Ar x 2), 127.9 (Ar x 2), 127.7 (Ar), 127.4 (Ar), 127.3 (Ar x 2), 117.5 (Ar x 2), 114.6 (Ar x 2), 108.8, 99.3, 98.7, 95.4, 81.8, 80.5, 80.3, 80.1, 79.9,

79.5, 79.4, 76.1, 75.6 75.2, 75.2, 68.7, 68.5, 63.6, 58.8 (OCH<sub>3</sub>), 58.4 (OCH<sub>3</sub>), 57.6 (OCH<sub>3</sub>), 55.6 (OCH<sub>3</sub>), 28.4, 26.4, 18.2, 18.0, 16.6. HRMS (ESI) Calcd. for (M + Na)<sup>+</sup> C<sub>45</sub>H<sub>60</sub>NaO<sub>14</sub>: 847.3875. Found 847.3867.

***p*-Methoxyphenyl 2-*O*-acetyl-4-*O*-benzyl-3-*O*-*p*-methoxybenzyl- $\alpha$ -L-rhamnopyranosyl-(1 $\rightarrow$ 3)-2,4-di-*O*-methyl- $\alpha$ -L-rhamnopyranoside (S28)**

To a solution of donor **S3** (0.47 g, 0.91 mmol) and acceptor **S2** (0.31 g, 1.01 mmol) in CH<sub>2</sub>Cl<sub>2</sub> (30 mL) was added crushed 4 Å molecular sieves (200 mg). After the reaction mixture was stirred at rt for 30 min, it was cooled to -20 °C, and then NIS (209 mg, 0.93 mmol) and AgOTf (61.6 mg, 0.24 mmol) were added. The reaction mixture was stirred for additional 30 min before the addition of Et<sub>3</sub>N (1 mL). The solution was concentrated to a crude residue that was purified by chromatography (3:1 hexane–EtOAc) to give **S28** (0.53 g, 85%) as an amorphous solid: *R*<sub>f</sub> 0.29 (3:1 hexane–EtOAc); *R*<sub>f</sub> 0.31 (3:1 hexane–EtOAc); [ $\alpha$ ]<sub>D</sub> -6.1 (*c* 1.0, CHCl<sub>3</sub>); <sup>1</sup>H NMR (500 MHz, CDCl<sub>3</sub>,  $\delta$ <sub>H</sub>) 7.37–7.25 (m, 5H, Ar), 7.27–7.25 (m, 2H, Ar), 7.00–6.96 (m, 2H, Ar), 6.85–6.81 (m, 4H, Ar), 5.46 (dd, 1H, *J*<sub>1,2'</sub> = 1.8 Hz, *J*<sub>2',3'</sub> = 3.3 Hz, H-2'), 5.37 (d, 1H, *J*<sub>1,2</sub> = 1.9 Hz, H-1), 5.08 (d, 1H, *J*<sub>1,2'</sub> = 1.8 Hz, H-1'), 4.94, 4.50 (ABq, 2H, *J* = 11.0 Hz, ArCH<sub>2</sub>), 4.65, 4.63 (ABq, 2H, *J* = 11.2 Hz, Ar-CH<sub>2</sub>), 4.10 (dd, 1H, *J*<sub>2,3</sub> = 3.3 Hz, *J*<sub>3,4</sub> = 9.6 Hz, H-3), 3.99–3.93 (m, 2H, H-3', H-5'), 3.79 (s, 3H, OCH<sub>3</sub>), 3.77 (s, 3H, OCH<sub>3</sub>), 3.68 (dq, 1H, *J*<sub>4,5</sub> = 9.6 Hz, *J*<sub>5,6</sub> = 6.2 Hz, H-5), 3.65 (dd, 1H, *J*<sub>1,2</sub> = 1.9 Hz, *J*<sub>2,3</sub> = 3.3 Hz, H-2), 3.52 (s, 3H, OCH<sub>3</sub>), 3.49 (s, 3H, OCH<sub>3</sub>), 3.47–3.45 (m, 1H, H-4'), 3.21 (app t, 1H, *J*<sub>3,4</sub> = *J*<sub>4,5</sub> = 9.6 Hz, H-4), 2.17 (s, 3H, CH<sub>3</sub>CO), 1.36 (d, 3H, *J*<sub>5',6'</sub> = 6.3 Hz, H-6'), 1.26 (d, 3H, *J*<sub>5,6</sub> = 6.2 Hz, H-6); <sup>13</sup>C NMR (125.7 MHz, CDCl<sub>3</sub>,  $\delta$ <sub>C</sub>) 170.3 (C=O), 159.3 (Ar), 154.9 (Ar), 150.4 (Ar), 138.6 (Ar), 130.1 (Ar), 129.7 (Ar x 2), 128.4 (Ar x 2), 128.0 (Ar x 2), 127.7 (Ar), 117.5 (Ar x 2), 114.6 (Ar x 2), 113.8 (Ar x 2), 99.7, 95.9, 82.4, 80.2, 80.1, 78.3, 77.4, 75.4, 71.5, 69.4, 68.8, 68.4, 61.1 (OCH<sub>3</sub>), 59.1 (OCH<sub>3</sub>), 55.7 (OCH<sub>3</sub>), 55.3 (OCH<sub>3</sub>), 21.1, 18.2, 17.8. HRMS (ESI) Calcd. for (M + Na)<sup>+</sup> C<sub>38</sub>H<sub>48</sub>NaO<sub>12</sub>: 719.3038. Found 719.3030.

***p*-Methoxyphenyl 3,4-*O*-isopropylidene-2-*O*-methyl- $\alpha$ -L-fucopyranosyl-(1 $\rightarrow$ 3)-4-*O*-benzyl-2-*O*-methyl- $\alpha$ -L-rhamnopyranosyl-(1 $\rightarrow$ 3)-2,4-di-*O*-methyl- $\alpha$ -L-rhamnopyranoside (S29)**

Two solutions were prepared. Solution A was prepared by dissolving donor **S4** (25 mg, 0.08 mmol) in CH<sub>2</sub>Cl<sub>2</sub> (10 mL); containing crushed 4 Å molecular sieves (100 mg). Solution B was prepared by dissolving acceptor **19** (38 mg, 0.07 mmol) in CH<sub>2</sub>Cl<sub>2</sub> (10 mL); containing crushed 4 Å molecular sieves (100 mg). Both solutions A and B were stirred for 30 min at rt and then Solution B was cooled to -40 °C before NIS (18 mg, 0.08 mmol) and AgOTf (5 mg, 0.02 mmol) were added. Solution A was then added to Solution B dropwise over 5 min while stirring. The reaction mixture was stirred for additional 30 min at -40 °C before it was neutralized by the addition of Et<sub>3</sub>N (1 mL). The solution was filtered, concentrated and the resulting residue was purified by chromatography (2:1 hexane-EtOAc) to give **S29** (43.5 mg, 83%) as a colorless oil: *R*<sub>f</sub> 0.36 (2:1 hexane-EtOAc); [ $\alpha$ ]<sub>D</sub> +89.0 (*c* 0.8, CHCl<sub>3</sub>); <sup>1</sup>H NMR (500 MHz, CDCl<sub>3</sub>,  $\delta$ <sub>H</sub>) 7.39–7.55 (m, 5H, Ar), 7.00–6.89 (m, 2H, Ar), 6.83–6.81 (m, 2H, Ar), 5.43–5.42 (d, 1H, *J*<sub>1,2</sub> = 1.7 Hz, H-1), 5.17 (d, 1H, *J*<sub>1',2'</sub> = 1.8 Hz, H-1'), 5.14 (d, 1H, *J*<sub>1'',2''</sub> = 3.5 Hz, H-1''), 5.15, 4.53 (ABq, 2H, *J* = 11.0 Hz, ArCH<sub>2</sub>), 4.45 (dq, 1H, *J*<sub>4'',5''</sub> = 2.8 Hz, *J*<sub>5'',6''</sub> = 6.4 Hz, H-5''), 4.34 (dd, 1H, *J*<sub>2'',3''</sub> = 9.8 Hz, *J*<sub>3'',4''</sub> = 2.8 Hz, H-3''), 4.47–4.44 (m, 2H, H-3, H-4''), 4.01 (dd, 1H, *J*<sub>2',3'</sub> = 3.2 Hz, *J*<sub>3',4'</sub> = 9.5 Hz, H-3'), 3.93 (dq, 1H, *J*<sub>4',5'</sub> = 9.4 Hz, *J*<sub>5',6'</sub> = 6.4 Hz, H-5'), 3.84–3.79 (m, 1H, H-5), 3.77 (s, 3H, OCH<sub>3</sub>), 3.71–3.66 (m, 2H, H-2, H-2'), 3.55 (s, 3H, OCH<sub>3</sub>), 3.51–3.47 (m, 7H, H-4', OCH<sub>3</sub> x 2), 3.38 (s, 3H, OCH<sub>3</sub>), 3.35 (dd, 1H, *J*<sub>1'',2''</sub> = 3.1 Hz, *J*<sub>2'',3''</sub> = 9.8 Hz, H-2''), 3.22 (app t, 1H, *J*<sub>3,4</sub> = *J*<sub>4,5</sub> = 9.6 Hz, H-4), 1.54 (s, 3H, (CH<sub>3</sub>)<sub>2</sub>C), 1.36–1.34 (m, 9H, (CH<sub>3</sub>)<sub>2</sub>C, H-6', H-6''), 1.26 (d, 3H, *J*<sub>5,6</sub> = 6.2 Hz, H-6); <sup>13</sup>C NMR (125.7 MHz, CDCl<sub>3</sub>,  $\delta$ <sub>C</sub>) 154.9 (Ar), 150.5 (Ar), 139.0 (Ar), 128.2 (Ar x 2), 127.9 (Ar x 2), 127.4 (Ar), 117.5 (Ar x 2), 114.6 (Ar x 2), 108.8, 99.3, 98.7, 95.6, 82.1, 80.5, 80.3, 80.1, 79.9, 79.5, 79.4, 76.1, 75.6, 75.2, 68.7, 68.5, 63.6, 61.3 (OCH<sub>3</sub>), 58.8 (OCH<sub>3</sub>), 58.4 (OCH<sub>3</sub>), 57.6 (OCH<sub>3</sub>), 55.6 (OCH<sub>3</sub>), 28.4, 26.4, 18.2, 18.0, 16.6. HRMS (ESI) Calcd. for (M + Na)<sup>+</sup> C<sub>39</sub>H<sub>56</sub>NaO<sub>14</sub>: 771.3562. Found 771.3562.



*p*-Methoxyphenyl      3-*O*-*p*-methoxybenzyl-2-*O*-methyl- $\alpha$ -L-fucopyranosyl-(1 $\rightarrow$ 3)-4-*O*-benzyl-2'-*O*-methyl- $\alpha$ -L-rhamnopyranosyl-(1 $\rightarrow$ 3)-2,4-di-*O*-methyl- $\alpha$ -L-rhamnopyranoside (S30)

To a solution of donor **25** (70 mg, 0.16 mmol) in CH<sub>2</sub>Cl<sub>2</sub> (10 mL), crushed 4 Å molecular sieves (100 mg) was added (Solution A). To another solution, containing acceptor **26** (72 mg, 0.13 mmol) in CH<sub>2</sub>Cl<sub>2</sub> (10 mL) was added crushed 4 Å molecular sieves (100 mg) (Solution B). Both solutions were then stirred for 30 min at rt. After 30 min, Solution A was cooled to -40 °C. To solution B was added NIS (36 mg, 0.16 mmol) and AgOTf (10 mg, 0.04 mmol) and it was then added dropwise to Solution A over 5 min while stirring. The reaction mixture was stirred for additional 30 min at -40 °C before Et<sub>3</sub>N (1 mL) was added. The solution was filtered, concentrated and the resulting residue was purified by chromatography (2:1 hexane–EtOAc) to give a syrup. This syrup was dissolved in AcOH (4 mL) and (Ph<sub>3</sub>P)<sub>4</sub>Pd (18 mg, 20% w/w) was added. The reaction mixture was stirred overnight at rt before it was filtered, concentrated and the resulting residue was purified by chromatography (1:1 hexane–EtOAc) to give **S30** (76.4 mg, 71%) as colorless oil: *R*<sub>f</sub> 0.52 (1:1 hexane–EtOAc); [ $\alpha$ ]<sub>D</sub> +0.3 (*c* 0.8, CHCl<sub>3</sub>); <sup>1</sup>H NMR (500 MHz, CDCl<sub>3</sub>,  $\delta$ <sub>H</sub>) 7.40–7.26 (m, 7H, Ar), 7.00–6.97 (m, 2H, Ar), 6.86–6.81 (m, 4H, Ar), 5.39 (d, 1H, *J*<sub>1,2</sub> = 1.7 Hz, H-1), 5.19, 4.55 (ABq, 2H, *J* = 11.0 Hz, ArCH<sub>2</sub>), 5.20–5.17 (m, 2H, H-1', H-1''), 4.72, 4.64 (ABq, 2H, *J* = 11.0 Hz, ArCH<sub>2</sub>), 4.18 (dq, 1H, *J*<sub>4'',5''</sub> = 2.7 Hz, *J*<sub>5'',6''</sub> = 6.3 Hz, H-5''), 4.20–4.06 (m, 2H, H-3', H-4''), 3.96–3.90 (m, 2H, H-3, H-5'), 3.86–3.84 (m, 1H, H-4'), 3.77 (s, 3H, OCH<sub>3</sub>), 3.76 (s, 3H, OCH<sub>3</sub>), 3.75–3.67 (m, 4H, H-2, H-2', H-3'', H-5), 3.59 (dd, 1H, *J*<sub>1'',2''</sub> = 3.3 Hz, *J*<sub>2'',3''</sub> = 9.7 Hz, H-2''), 3.44 (s, 3H, OCH<sub>3</sub>), 3.50 (s, 3H, OCH<sub>3</sub>), 3.48 (s, 3H, OCH<sub>3</sub>), 3.37 (s, 3H, OCH<sub>3</sub>), 3.23 (app t, 1H, *J*<sub>3,4</sub> = *J*<sub>4,5</sub> = 9.6 Hz, H-4), 1.75 (br s, 1H, OH-3''), 1.33 (d, 3H, *J*<sub>5',6'</sub> = 6.2 Hz, H-6'), 1.29 (d, 3H, *J*<sub>5,6</sub> = 6.2 Hz, H-6), 1.27 (d, 1H, *J*<sub>5'',6''</sub> = 6.3 Hz, H-6''); <sup>13</sup>C NMR (125.7 MHz, CDCl<sub>3</sub>,  $\delta$ <sub>C</sub>) 159.3 (Ar), 154.9 (Ar), 150.5 (Ar), 139.1 (Ar), 130.3 (Ar x 2), 129.3 (Ar x 2), 128.2 (Ar x 2), 127.8 (Ar x 2), 117.5 (Ar x 2), 114.6 (Ar x 2), 113.9 (Ar x 2), 99.8, 98.5, 95.6, 82.0, 80.7, 80.2, 79.9, 79.6, 77.7, 77.1, 75.1, 72.0, 70.1, 68.8, 68.6, 65.7, 61.2, 59.2 (OCH<sub>3</sub>), 59.1 (OCH<sub>3</sub>), 58.9 (OCH<sub>3</sub>), 57.8 (OCH<sub>3</sub>), 55.7 (OCH<sub>3</sub>), 55.2 (OCH<sub>3</sub>), 18.2, 17.9, 16.4. HRMS (ESI) Calcd. for (M + Na)<sup>+</sup> C<sub>44</sub>H<sub>60</sub>NaO<sub>15</sub>: 851.3824. Found 851.3809.

### **Methyl 2,3-*O*-isopropylidene-6-*O*-tosyl- $\alpha$ -D-mannopyranoside (S32)**

To a solution of methyl  $\alpha$ -D-mannopyranoside (**S31**, 2 g, 10.3 mmol) in pyridine (15 mL), DMAP (0.19 g, 0.1% w/w) and TsCl (2.04 g, 10.92 mmol) were added and the reaction mixture was stirred overnight at rt. Water (50 mL) was then added and the mixture was diluted with CH<sub>2</sub>Cl<sub>2</sub> (60 mL), washed with water (2  $\times$  60 mL), 1M HCl soln (2  $\times$  60 mL), and finally brine (2  $\times$  60 mL). The organic layer was separated, dried (Na<sub>2</sub>SO<sub>4</sub>), filtered and concentrated. The resulting residue was dissolved in acetone (30 mL) and DMP (2 mL) and *p*-TSA (20 mg) were added. The reaction mixture was stirred for 2 h at rt and then Et<sub>3</sub>N (1 mL) was added. The solution was concentrated and the resulting residue was purified by chromatography (4:1 hexane–EtOAc) to give **S32** (3.12 g, 78%) as a colorless oil: *R*<sub>f</sub> 0.49 (3:1 hexane–EtOAc); [ $\alpha$ ]<sub>D</sub> –11.0 (*c* 1.2, CHCl<sub>3</sub>); <sup>1</sup>H NMR (400 MHz, CDCl<sub>3</sub>,  $\delta$ <sub>H</sub>) 7.81–7.97 (m, 2H, Ar), 7.35–7.33 (m, 2H, Ar), 4.83 (br s, 1H, H-1), 4.28 (app d, 2H, *J*<sub>5,6</sub> = 4.0 Hz, H-6), 4.10–4.09 (m, 2H, H-2, H-3), 3.74–3.70 (m, H, H-5), 3.62–3.55 (m, 1H, H-4), 3.33 (s, 3H, OCH<sub>3</sub>), 2.83 (d, 1H, *J*<sub>4,OH-4</sub> = 5.0 Hz, OH-4), 2.44 (s, 3H, ArCH<sub>3</sub>), 1.47 (s, 3H, (CH<sub>3</sub>)<sub>2</sub>C), 1.32 (s, 3H, (CH<sub>3</sub>)<sub>2</sub>C); <sup>13</sup>C NMR (125.7 MHz, CDCl<sub>3</sub>,  $\delta$ <sub>C</sub>) 144.9 (Ar), 132.9 (Ar), 129.8 (Ar  $\times$  2), 128.0 (Ar  $\times$  2), 109.8, 98.3, 78.0, 75.4, 69.2, 68.6, 68.3, 55.2 (OCH<sub>3</sub>), 27.8, 26.0, 21.7. HRMS (ESI) Calcd. for (M + Na)<sup>+</sup> C<sub>17</sub>H<sub>24</sub>NaO<sub>8</sub>S: 411.1084. Found 411.1086.

### **Methyl 6-deoxy-2,3-*O*-isopropylidene-4-*O*-methyl- $\alpha$ -D-mannopyranoside (S33)**

To a solution of **S32** (1.5 g, 3.86 mmol) in DMSO (30 mL) was added NaBH<sub>4</sub> (0.18 g, 4.63 mmol) and the reaction mixture was stirred for 8 h at 80 °C. The solution was cooled to 0 °C before the addition of water (30 mL). The mixture was diluted with CH<sub>2</sub>Cl<sub>2</sub> (50 mL), washed with water (2  $\times$  50 mL), 1M HCl soln (2  $\times$  50 mL) and brine (50 mL). The organic layer was separated, dried (Na<sub>2</sub>SO<sub>4</sub>), filtered and concentrated. The resulting residue was dissolved in DMF (10 mL) and CH<sub>3</sub>I (0.30 mL, 4.63 mmol) was added. To this solution, NaH (60% in mineral oil, 0.18 g, 6.2 mmol) was added at 0 °C and then the reaction mixture was stirred for 1 h at rt. Then, chilled water (20 mL) was added and then mixture was diluted with CH<sub>2</sub>Cl<sub>2</sub> (40

mL), washed with water (2 x 30 mL), 1M HCl soln (2 x 30 mL) and brine (30 mL). The organic layer was dried (Na<sub>2</sub>SO<sub>4</sub>), filtered, concentrated, and the resulting residue was purified by chromatography (5:1 hexane–EtOAc) to give **S33** (0.62 g, 69%) as a colorless oil: *R*<sub>f</sub> 0.65 (5:1 hexane–EtOAc); [α]<sub>D</sub> +29.1 (*c* 0.4, CHCl<sub>3</sub>); <sup>1</sup>H NMR (500 MHz, CDCl<sub>3</sub>, δ<sub>H</sub>) 4.84 (br s, 1H, H-1), 4.14–4.09 (m, 2H, H-2, H-3), 3.57 (dq, 1H, *J*<sub>4,5</sub> = 9.8 Hz, *J*<sub>5,6</sub> = 6.4 Hz, H-5), 3.53 (s, 3H, OCH<sub>3</sub>), 3.36 (s, 3H, OCH<sub>3</sub>), 2.97 (dd, 1H, *J*<sub>3,4</sub> = 6.5 Hz, *J*<sub>4,5</sub> = 9.8 Hz, H-4), 1.55 (s, 3H, (CH<sub>3</sub>)<sub>2</sub>C), 1.35 (s, 3H, (CH<sub>3</sub>)<sub>2</sub>C), 1.28 (d, 3H, *J*<sub>5,6</sub> = 6.4 Hz, H-6); <sup>13</sup>C NMR (125.7 MHz, CDCl<sub>3</sub>, δ<sub>C</sub>) 109.3, 98.3, 83.8, 78.5, 76.2, 64.7, 59.6 (OCH<sub>3</sub>), 55.0 (OCH<sub>3</sub>), 28.3, 26.5, 17.9. HRMS (ESI) Calcd. for (M + Na)<sup>+</sup> C<sub>11</sub>H<sub>20</sub>NaO<sub>5</sub>: 255.1203. Found 255.1206.

#### **Methyl 2-*O*-acetyl-3-*O*-benzyl-6-deoxy-4-*O*-methyl-α-D-mannopyranoside (S34)**

To a solution of **S33** (0.5 g, 2.16 mmol) in 3:1 CH<sub>3</sub>OH–CH<sub>2</sub>Cl<sub>2</sub> (20 mL), *p*-TSA (10 mg) was added. The reaction mixture was stirred for 4 h at rt before the addition of Et<sub>3</sub>N (1 mL). The reaction mixture was then concentrated and the resulting residue was dissolved in toluene (30 mL) and *n*-Bu<sub>2</sub>SnO (0.53 g, 2.16 mmol) was added. The reaction mixture was heated at 120 °C for 1 h. Then, it was cooled to 62 °C, and *n*-Bu<sub>4</sub>NI (0.6 g, 2.4 mmol) and BnBr (0.28 mL, 2.4 mmol) were added. The reaction mixture was stirred for additional 7 h at 62 °C and then cooled and concentrated. The resulting residue was purified by chromatography (3:1 hexane–EtOAc) to give an oil. This oil was dissolved in pyridine (5 mL), before Ac<sub>2</sub>O (2 mL) was added. The reaction mixture was stirred for 1 h at rt before the addition of water (20 mL). Dilution of the mixture with CH<sub>2</sub>Cl<sub>2</sub> (40 mL) was followed by separation of the organic layer, which was washed with water (2 x 30 mL), 1M HCl soln (2 x 30 mL), brine (30 mL), dried (Na<sub>2</sub>SO<sub>4</sub>), filtered and concentrated. The resulting residue was purified by chromatography (6:1 hexane–EtOAc) to give **S34** (0.53 g, 79%) as a colorless oil: *R*<sub>f</sub> 0.39 (6:1 hexane–EtOAc); [α]<sub>D</sub> +22.5 (*c* 0.8, CHCl<sub>3</sub>); <sup>1</sup>H NMR (400 MHz, CDCl<sub>3</sub>, δ<sub>H</sub>) 7.38–7.28 (m, 5H, Ar-H), 5.33 (dd, 1H, *J*<sub>1,2</sub> = 1.8 Hz, *J*<sub>2,3</sub> = 3.5 Hz, H-2), 4.68, 4.54 (ABq, 2H, *J* = 11.4 Hz, ArCH<sub>2</sub>), 4.61 (d, 1H, *J*<sub>1,2</sub> = 1.8 Hz, H-1), 3.80 (dd, 1H, *J*<sub>2,3</sub> = 3.5 Hz, *J*<sub>3,4</sub> = 9.4 Hz, H-3), 3.63 (dq, 1H, *J*<sub>4,5</sub> = 9.4 Hz, *J*<sub>5,6</sub> = 6.4 Hz,

H-5), 3.58 (s, 3H, OCH<sub>3</sub>), 3.35 (s, 3H, OCH<sub>3</sub>), 3.15 (app t, 1H,  $J_{3,4} = J_{4,5} = 9.4$  Hz, H-4), 2.14 (s, 3H, CH<sub>3</sub>CO), 1.34 (d, 3H,  $J_{5,6} = 6.4$  Hz, H-6); <sup>13</sup>C NMR (125.7 MHz, CDCl<sub>3</sub>, δ<sub>C</sub>) 170.6 (C=O), 138.4 (Ar), 128.6 (Ar x 2), 128.1 (Ar x 2), 127.9 (Ar), 98.9, 82.1, 78.0, 71.9, 69.2, 67.8, 61.3 (OCH<sub>3</sub>), 55.1 (OCH<sub>3</sub>), 21.3, 18.1. HRMS (ESI) Calcd. for (M + Na)<sup>+</sup> C<sub>17</sub>H<sub>24</sub>NaO<sub>6</sub>: 347.1465. Found 347.1469.

### **Methyl 2,3-*O*-isopropylidene-6-*tert*-butyldiphenylsilyl- $\alpha$ -D-mannopyranoside (S35)**

To a solution of methyl  $\alpha$ -D-mannopyranoside, (**S31**, 3 g, 15.05 mmol) in pyridine (20 mL) and Et<sub>3</sub>N (2.5 mL), TBDPSCI (4.96 g, 18.06 mmol) was added and the reaction mixture was heated at 60 °C for 3 h. Water (50 mL) was added and then solution was diluted with CH<sub>2</sub>Cl<sub>2</sub> (80 mL), washed with water (2 x 60 mL), 1M soln HCl (2 x 60 mL) and brine (2 x 60 mL). The organic layer was separated, dried (Na<sub>2</sub>SO<sub>4</sub>), filtered and concentrated. The resulting residue was dissolved in acetone (30 mL) before DMP (4 mL) and *p*-TSA (100 mg) were added. The reaction mixture was stirred for 3 h at rt before Et<sub>3</sub>N (1 mL) was added. The reaction mixture was concentrated and the resulting crude product was purified by chromatography (4:1 hexane–EtOAc) to give **S35** (6.25 g, 88%) as a colorless oil: *R*<sub>f</sub> 0.78 (4:1 hexane–EtOAc); [ $\alpha$ ]<sub>D</sub> –0.13 (*c* 1.2, CHCl<sub>3</sub>); <sup>1</sup>H NMR (400 MHz, CDCl<sub>3</sub>, δ<sub>H</sub>) 7.75–7.73 (m, 4H, Ar), 7.48–7.41 (m, 6H, Ar), 4.91 (d, 1H,  $J_{1,2} = 4.5$  Hz, H-1), 4.19–4.13 (m, 2H, H-2, H-3), 3.98–3.90 (m, 2H, H-6 x 2), 3.85–3.81 (m, 1H, H-4), 3.68–3.64 (m, 1H, H-5), 3.37 (s, 3H, OCH<sub>3</sub>), 2.82 (s, 1H, OH-4), 1.53 (s, 3H, (CH<sub>3</sub>)<sub>2</sub>C), 1.37 (s, 3H, (CH<sub>3</sub>)<sub>2</sub>C), 1.10 (s, 9H, (CH<sub>3</sub>)<sub>3</sub>C); <sup>13</sup>C NMR (125.7 MHz, CDCl<sub>3</sub>, δ<sub>C</sub>) 135.7 (Ar x 2), 135.6 (Ar x 2), 133.1 (Ar), 133.0 (Ar), 129.8(3) (Ar), 129.8(1) (Ar), 127.7(8) (Ar x 2), 127.7(4) (Ar x 2), 109.5, 98.3, 78.2, 75.3, 70.6, 69.5, 64.7, 54.9 (OCH<sub>3</sub>), 27.9, 26.1, 26.8, 19.2. HRMS (ESI) Calcd. for (M + Na)<sup>+</sup> C<sub>26</sub>H<sub>36</sub>NaO<sub>6</sub>Si: 495.2173. Found 495.2171.

### Methyl 4,6-di-*O*-benzyl- $\alpha$ -D-mannopyranoside (S36)

To a solution of **S35** (3 g, 6.35 mmol) in THF (40 mL), TBAF (7.75 mL of 1M soln in THF, 7.75 mmol) was added and the reaction mixture was stirred for 2 h at rt before water (60 mL) was added. The solution was diluted with CH<sub>2</sub>Cl<sub>2</sub> (100 mL) and washed with 1M soln HCl (2 x 80 mL). The organic layer was separated, dried (Na<sub>2</sub>SO<sub>4</sub>), filtered and concentrated. The resulting residue was dissolved in DMF (20 mL) and BnBr (2 mL, 15.5 mmol) was added. To this solution, NaH (60% in mineral oil, 0.6 g, 20.64 mmol) was added portionwise over 2 min at 0 °C and it was then stirred for additional 2 h at rt before chilled water (30 mL) and CH<sub>2</sub>Cl<sub>2</sub> (60 mL) were added. The organic layer was washed with water (2 x 50 mL), satd. aq. NaHCO<sub>3</sub> soln (2 x 50 mL), brine (50 mL), dried (Na<sub>2</sub>SO<sub>4</sub>), filtered and concentrated. The resulting crude product was purified by chromatography (4:1 hexane–EtOAc) to give a syrup. To the solution of this syrup in 2:1 CH<sub>3</sub>OH–CH<sub>2</sub>Cl<sub>2</sub> (30 mL), *p*-TSA (100 mg) was added. The reaction mixture was stirred overnight at rt before Et<sub>3</sub>N (1 mL) was added. The solution was then concentrated and the resulting residue was purified by chromatography (1:1 hexane–EtOAc) to give **S36** (1.76 g, 74%) as a colorless oil: *R*<sub>f</sub> 0.45 (1:1 hexane–EtOAc); [ $\alpha$ ]<sub>D</sub> +39.0 (*c* 2.0, CHCl<sub>3</sub>); <sup>1</sup>H NMR (500 MHz, CDCl<sub>3</sub>,  $\delta$ <sub>H</sub>) 7.46–7.25 (m, 10H, Ar), 4.75, 4.57 (ABq, 2H, *J* = 12.1 Hz, ArCH<sub>2</sub>), 4.76 (d, 1H, *J*<sub>1,2</sub> = 1.8 Hz, H-1), 4.69, 4.59 (ABq, 2H, *J* = 12.2 Hz, ArCH<sub>2</sub>), 3.95–3.89 (m, 2H, H-2, H-3), 3.83–3.73 (m, 4H, H-4, H-5, H-6 x 2), 3.39 (s, 3H, OCH<sub>3</sub>), 2.66 (d, 1H, *J*<sub>2,OH-2</sub> = 5.2 Hz, OH-2), 2.49 (d, 1H, *J*<sub>3,OH-3</sub> = 6.0 Hz, OH-3); <sup>13</sup>C NMR (125.7 MHz, CDCl<sub>3</sub>,  $\delta$ <sub>C</sub>) 138.6 (Ar), 138.2 (Ar), 135.8 (Ar), 135.0 (Ar), 129.8 (Ar), 128.8 (Ar), 128.6 (Ar), 18.2(2) (Ar), 128.1(6) (Ar), 128.1 (Ar), 128.0 (Ar), 127.9 (Ar), 100.9, 77.0, 74.9, 73.8, 72.1, 71.2, 70.9, 69.1, 55.2 (OCH<sub>3</sub>). HRMS (ESI) Calcd. for (M + Na)<sup>+</sup> C<sub>21</sub>H<sub>26</sub>NaO<sub>6</sub>: 397.1622. Found 397.1625.

### Methyl 2-acetyl-3,4,6-tri-*O*-benzyl- $\alpha$ -D-mannopyranoside (S37)

To a solution of **S36** (1.6 g, 4.27 mmol) in toluene (40 mL), *n*-Bu<sub>2</sub>SnO (1.17 g, 4.70 mmol) was added and the reaction mixture was heated at 120 °C for 1 h. The solution was then cooled to 62 °C, *n*-Bu<sub>4</sub>NI (1.9 g,

5.19 mmol) and BnBr (0.62 mL, 5.14 mmol) were added and the reaction mixture was stirred overnight at 62 °C. The reaction mixture was then concentrated and the resulting residue was purified by chromatography (2:1 hexane–EtOAc) to give a syrup. This syrup was dissolved in pyridine (10 mL) and Ac<sub>2</sub>O (2 mL) was added. The reaction mixture was stirred for 1 h at rt before the addition of water (30 mL) and CH<sub>2</sub>Cl<sub>2</sub> (50 mL). The organic layer was separated, washed with water (2 x 50 mL), 1M HCl soln (2 x 50 mL), brine (50 mL), dried (Na<sub>2</sub>SO<sub>4</sub>), filtered and concentrated. The resulting crude product was purified by chromatography (6:1 hexane–EtOAc) to give **S37** (1.81 g, 84%) as a colorless oil: *R*<sub>f</sub> 0.52 (6:1 hexane–EtOAc); [α]<sub>D</sub> +24.3 (*c* 1.3, CHCl<sub>3</sub>); <sup>1</sup>H NMR (400 MHz, CDCl<sub>3</sub>, δ<sub>H</sub>) 7.40–7.28 (m, 13H, Ar), 7.21–7.17 (m, 2H, Ar), 5.39 (dd, 1H, *J*<sub>1,2</sub> = 1.9 Hz, *J*<sub>2,3</sub> = 3.3 Hz, H-2), 4.89, 4.51 (ABq, 2H, *J* = 10.5 Hz, ArCH<sub>2</sub>), 4.76 (d, 1H, *J*<sub>1,2</sub> = 1.9 Hz, H-1), 4.74, 4.55 (ABq, 2H, *J* = 10.5 Hz, ArCH<sub>2</sub>), 4.72, 4.57 (ABq, 2H, *J* = 10.5 Hz, ArCH<sub>2</sub>), 3.99 (dd, 1H, *J*<sub>2,3</sub> = 3.3 Hz, *J*<sub>3,4</sub> = 9.4 Hz, H-3), 3.90 (app t, 1H, *J*<sub>3,4</sub> = *J*<sub>4,5</sub> = 9.4 Hz, H-4), 3.88–3.73 (m, 3H, H-5, H-6 x 2), 3.38 (s, 3H, OCH<sub>3</sub>), 2.17 (s, 3H, CH<sub>3</sub>CO); <sup>13</sup>C NMR (125.7 MHz, CDCl<sub>3</sub>, δ<sub>C</sub>) 170.7 (C=O), 138.7 (Ar), 138.5 (Ar), 138.2 (Ar), 128.6 (Ar x 2), 128.6 (Ar x 2), 128.3 (Ar x 2), 128.1 (Ar x 2), 128.0(0) (Ar x 2), 127.9(6) (Ar), 127.8(2) (Ar x 2), 127.8(1) (Ar x 2), 99.0, 78.4, 75.4, 74.6, 73.7, 72.0, 71.5, 69.17, 68.9, 55.2 (OCH<sub>3</sub>), 21.4. HRMS (ESI) Calcd. for (M + Na)<sup>+</sup> C<sub>30</sub>H<sub>34</sub>NaO<sub>7</sub>: 529.2197. Found 529.2189.

### **Methyl 6-*O*-benzyl-2,3-*O*-isopropylidene-4-*O*-methyl-α-D-mannopyranoside (S38)**

To a solution of compound **S35** (3.05 g, 6.45 mmol) and CH<sub>3</sub>I (0.6 mL, 7.75 mmol) in DMF (20 mL), NaH (60% in mineral oil, 0.25 g, 10.3 mmol) was added at 0 °C portionwise over 2 min. The reaction mixture was stirred for 1 h at rt before the addition of water (30 mL). The solution was concentrated, diluted with CH<sub>2</sub>Cl<sub>2</sub> (60 mL) and washed with water (2 × 50 mL). The organic layer was separated, dried (Na<sub>2</sub>SO<sub>4</sub>), filtered and concentrated. The resulting residue was dissolved in THF (20 mL), TBAF (7.75 mL of 1M soln in THF, 7.75 mmol) was added and the reaction mixture was stirred for 2 h at rt. Water (50 mL) was added and the solution was diluted with CH<sub>2</sub>Cl<sub>2</sub> (60 mL) and washed with 1M soln HCl (2 x 50 mL). The organic layer was

separated, dried (Na<sub>2</sub>SO<sub>4</sub>), filtered and concentrated. The resulting crude product was purified by chromatography (2:1 hexane–EtOAc) to give a syrup. This syrup was dissolved in DMF (20 mL) and BnBr (1.9 mL, 15.48 mmol) was added. To this solution, NaH (60% in mineral oil, 0.5 g, 20.65 mmol) was added portionwise over 2 min at 0 °C and the reaction mixture was stirred for additional 3 h at rt before chilled water (40 mL) and CH<sub>2</sub>Cl<sub>2</sub> (60 mL) were added. The organic layer was washed with water (2 x 50 mL), dried (Na<sub>2</sub>SO<sub>4</sub>), filtered and concentrated. The resulting residue was purified by chromatography (5:1 hexane–EtOAc) to give **S38** (1.7 g, 78%) as a colorless oil: *R*<sub>f</sub> 0.54 (5:1 hexane–EtOAc); [α]<sub>D</sub> +30.6 (*c* 1.4, CHCl<sub>3</sub>); <sup>1</sup>H NMR (400 MHz, CDCl<sub>3</sub>, δ<sub>H</sub>) 7.39–7.27 (m, 5H, Ar), 4.95 (br s, 1H, H-1), 4.68, 4.58 (ABq, 2H, *J* = 11.5 Hz, ArCH<sub>2</sub>), 4.22–4.18 (m, 1H, H-3), 4.13 (d, 1H, *J*<sub>2,3</sub> = 3.5 Hz, H-2), 3.77–3.64 (m, 3H, H-5, H-6 x 2), 3.41 (s, 3H, OCH<sub>3</sub>), 3.49 (s, 3H, OCH<sub>3</sub>), 3.34 (dd, 1H, *J*<sub>3,4</sub> = 9.7 Hz, *J*<sub>4,5</sub> = 8.9 Hz, H-4), 1.56 (s, 3H, (CH<sub>3</sub>)<sub>2</sub>C), 1.37 (s, 3H, (CH<sub>3</sub>)<sub>2</sub>C); <sup>13</sup>C NMR (125.7 MHz, CDCl<sub>3</sub>, δ<sub>C</sub>) 138.7 (Ar), 128.5 (Ar x 2), 127.8 (Ar x 2), 127.7 (Ar), 109.5, 98.6, 78.9, 78.1, 76.1, 73.7, 69.6, 68.6, 59.4 (OCH<sub>3</sub>), 55.1 (OCH<sub>3</sub>), 28.2, 26.5. HRMS (ESI) Calcd. for (M + Na)<sup>+</sup> C<sub>18</sub>H<sub>26</sub>NaO<sub>6</sub>: 361.1622. Found 361.1621.

### **Methyl 2-*O*-acetyl-3,6-di-*O*-benzyl-4-*O*-methyl-α-D-mannopyranoside (S39)**

To a solution of **S38** (3 g, 8.9 mmol) in 3:1 CH<sub>3</sub>OH–CH<sub>2</sub>Cl<sub>2</sub> (50 mL), *p*-TSA (100 mg) was added and the mixture was stirred for 4 h at rt before Et<sub>3</sub>N (2 mL) was added. The solution was concentrated and the resulting residue was dissolved in toluene (70 mL) and *n*-Bu<sub>2</sub>SnO (2.19 g, 8.87 mmol) was added. The reaction mixture was heated at 120 °C for 1 h. Then, it was cooled to 62 °C before *n*-Bu<sub>4</sub>NI (3.59 g, 9.76 mmol) and BnBr (1.15 mL, 9.76 mmol) were added and the reaction mixture was stirred for additional 7 h at 62 °C. The solution was then concentrated and the resulting residue was purified by chromatography (3:1 hexane–EtOAc) to give a syrup. This syrup was dissolved in pyridine (10 mL), Ac<sub>2</sub>O (5 mL) was added and the reaction mixture was stirred for 1 h at rt before water (40 mL) and CH<sub>2</sub>Cl<sub>2</sub> (60 mL) were added. The organic layer was separated, washed with water (2 x 50 mL), 1M HCl soln (2 x 50 mL), brine (50 mL), dried

(Na<sub>2</sub>SO<sub>4</sub>), filtered and concentrated. The resulting residue was purified by chromatography (6:1 hexane–EtOAc) to give **S39** (2.79 g, 73%) as a colorless oil: *R<sub>f</sub>* 0.45 (6:1 hexane–EtOAc); [α]<sub>D</sub> +29.8 (*c* 1.1, CHCl<sub>3</sub>); <sup>1</sup>H NMR (500 MHz, CDCl<sub>3</sub>, δ<sub>H</sub>) 7.40–7.27 (m, 10H, Ar), 5.33 (dd, 1H, *J*<sub>1,2</sub> = 1.8 Hz, *J*<sub>2,3</sub> = 3.4 Hz, H-2), 4.73, 4.68 (ABq, 2H, *J* = 10.1 Hz, ArCH<sub>2</sub>), 4.72 (d, 1H, *J*<sub>1,2</sub> = 1.8 Hz, H-1), 4.58, 4.51 (ABq, 2H, *J* = 10.1 Hz, ArCH<sub>2</sub>), 3.86 (dd, 1H, *J*<sub>2,3</sub> = 3.4 Hz, *J*<sub>3,4</sub> = 9.8 Hz, H-3), 3.82–3.78 (m, 1H, H-5), 3.74–3.36 (m, 2H, H-6 x 2), 3.59 (app t, 1H, *J*<sub>3,4</sub> = *J*<sub>4,5</sub> = 9.5 Hz, H-4), 3.51 (s, 3H, OCH<sub>3</sub>), 3.38 (s, 3H, OCH<sub>3</sub>), 2.14 (s, 3H, CH<sub>3</sub>CO); <sup>13</sup>C NMR (125.7 MHz, CDCl<sub>3</sub>, δ<sub>C</sub>) 170.7 (C=O), 138.6 (Ar), 138.4 (Ar), 128.6 (Ar x 2), 128.5 (Ar x 2), 128.1 (Ar x 2), 127.9 (Ar x 2), 127.8 (Ar x 2), 99.0, 78.2, 76.7, 73.7, 72.0, 71.6, 69.3, 69.0, 61.1, 21.4. HRMS (ESI) Calcd. for (M + Na)<sup>+</sup> C<sub>24</sub>H<sub>30</sub>NaO<sub>7</sub>: 453.1884. Found 453.1885.

***p*-Methoxyphenyl 2-*O*-benzoyl-3,4,6-tri-*O*-benzyl-α-D-mannopyranosyl-(1→3)-4-*O*-allyl-2-*O*-methyl-α-L-fucopyranosyl-(1→3)-4-*O*-benzyl-2-*O*-methyl-α-L-rhamnopyranosyl-(1→3)-2,4-di-*O*-methyl-α-L-rhamnopyranoside (S40)**

To a solution of donor **S5** (360 mg, 0.55 mmol) and acceptor **27** (240 mg, 0.32 mmol) in CH<sub>2</sub>Cl<sub>2</sub> (30 mL), crushed 4 Å molecular sieves (300 mg) were added. After the reaction mixture was stirred at rt for 30 min, it was cooled to –20 °C, NIS (103.5 mg, 0.46 mmol) and AgOTf (30.8 mg, 0.12 mmol) were added. The reaction mixture was stirred for additional 30 min at –20 °C before the addition of Et<sub>3</sub>N (1 mL). The solution was concentrated to a crude residue that was purified by chromatography (2:1 hexane–EtOAc) to give **S40** (259 mg, 63%) as a colorless oil: *R<sub>f</sub>* 0.55 (2:1 hexane–EtOAc); [α]<sub>D</sub> +0.4 (*c* 1.0, CHCl<sub>3</sub>); <sup>1</sup>H NMR (500 MHz, CDCl<sub>3</sub>, δ<sub>H</sub>) 8.08–8.06 (m, 2H, Ar), 7.57–7.53 (m, 1H, Ar), 7.50–7.711 (m, 22H, Ar), 7.00–6.97 (m, 2H, Ar), 6.84–6.81 (m, 2H, Ar), 5.93–5.86 (m, 1H, =CH), 5.73–5.72 (m, 1H, H-2'''), 5.39 (d, 1H, *J*<sub>1,2</sub> = 1.7 Hz, H-1), 5.36 (d, 1H, *J*<sub>1',2'</sub> = 1.8 Hz, H-1'), 5.27–5.23 (m, 1H, CH<sub>2</sub>=), 5.18 (d, 1H, *J*<sub>1'',2''</sub> = 3.3 Hz, H-1''), 5.16–5.13 (m, 3H, H-1''', =CH<sub>2</sub>, ArCH<sub>2</sub>), 4.92, 4.52 (ABq, 2H, *J* = 11.2 Hz, ArCH<sub>2</sub>), 4.80, 4.55 (ABq, 2H, *J* = 11.2 Hz, ArCH<sub>2</sub>), 4.70, 4.53 (ABq, 2H, *J* = 10.8 Hz, ArCH<sub>2</sub>), 4.59 (d, 1H, *J* = 11.3 Hz, ArCH<sub>2</sub>), 4.34–4.30



(m, 1H, CH<sub>2</sub>O), 4.25 (dd, 1H,  $J_{2'',3''} = 9.8$  Hz,  $J_{3'',4''} = 2.8$  Hz, H-3''), 4.18 (dq, 1H,  $J_{4'',5''} = 2.7$  Hz,  $J_{5'',6''} = 6.4$  Hz, H-5''), 4.12–4.03 (m, 4H, CH<sub>2</sub>O, H-6''' x 2, H-5'), 4.01–3.92 (m, 3H, H-5''', H-3, H-5), 3.87 (dd, 1H,  $J_{2',3'} = 3.3$  Hz,  $J_{3',4'} = 9.5$  Hz, H-3'), 3.81–3.77 (m, 4H, OCH<sub>3</sub>, H-2), 3.74–3.67 (m, 4H, H-2', H-2'', H-3''', H-4''), 3.57–3.54 (m, 4H, H-4''', OCH<sub>3</sub>), 3.50–3.46 (m, 4H, H-4', OCH<sub>3</sub>), 3.44 (s, 3H, OCH<sub>3</sub>), 3.32 (s, 3H, OCH<sub>3</sub>), 3.22 (app t, 1H,  $J_{3,4} = J_{4,5} = 9.6$  Hz, H-4), 1.33 (d, 3H,  $J_{5',6'} = 6.2$  Hz, H-6'), 1.27 (d, 3H,  $J_{5,6} = 6.2$  Hz, H-6), 1.20 (d, 3H,  $J_{5'',6''} = 6.4$  Hz, H-6''); <sup>13</sup>C NMR (125.7 MHz, CDCl<sub>3</sub>, δ<sub>C</sub>) 165.5 (C=O), 154.9 (Ar), 150.5 (Ar), 139.1 (Ar), 138.6 (Ar), 138.6 (Ar), 137.9 (Ar), 135.2 (=CH), 133.0(2) (Ar), 130.0(3) (Ar), 130.0 (Ar), 129.1 (Ar), 128.4 (Ar x 2), 128.4 (Ar x 2), 128.3 (Ar x 2), 128.3 (Ar x 2), 128.1 (Ar x 2), 127.8 (Ar), 127.6 (Ar), 127.5 (Ar), 127.4(3) (Ar), 127.3(8) (Ar), 127.1 (Ar), 126.3 (Ar), 117.5 (Ar), 117.4 (CH<sub>2</sub>=), 114.6 (Ar x 2), 99.6, 99.3, 98.5, 95.6, 82.0, 81.4, 80.6, 80.0, 79.4, 79.3, 79.3, 78.9, 77.8, 75.9, 75.1, 75.1, 74.3(9), 74.3(6), 73.5, 72.6, 71.4, 69.4, 68.9, 68.7(3), 68.6(7), 66.9, 61.2 (OCH<sub>3</sub>), 58.9 (OCH<sub>3</sub>), 38.6 (OCH<sub>3</sub>), 57.8 (OCH<sub>3</sub>), 55.7 (OCH<sub>3</sub>), 18.2(1), 18.1(7), 16.8. HRMS (ESI) Calcd. for (M + Na)<sup>+</sup> C<sub>73</sub>H<sub>88</sub>NaO<sub>20</sub>: 1307.5761. Found 1307.5746.

***p*-Methoxyphenyl 2-*O*-benzoyl-3,6-di-*O*-benzyl-4-*O*-methyl- $\alpha$ -D-mannopyranosyl-(1→3)-4-*O*-allyl-2-*O*-methyl- $\alpha$ -L-fucopyranosyl-(1→3)-4-*O*-benzyl-2-*O*-methyl- $\alpha$ -L-rhamnopyranosyl-(1→3)-2,4-di-*O*-methyl- $\alpha$ -L-rhamnopyranoside (S41)**

To a solution of donor **S6** (158 mg, 0.27 mmol) and acceptor **27** (120 mg, 0.16 mmol) in CH<sub>2</sub>Cl<sub>2</sub> (30 mL), crushed 4 Å molecular sieves (200 mg) were added. After the mixture was stirred at rt for 30 min, it was cooled to –20 °C, NIS (52 mg, 0.23 mmol) and AgOTf (15.4 mg, 0.06 mmol) were added and the reaction mixture was stirred for additional 30 min at –20 °C before the addition of Et<sub>3</sub>N (1 mL). The solution was concentrated to a crude residue that was purified by chromatography (2:1 hexane–EtOAc) to give **S41** (122 mg, 63%) a colorless oil: *R*<sub>f</sub> 0.49 (4:1 hexane–EtOAc); [ $\alpha$ ]<sub>D</sub> –23.7 (*c* 1.1, CHCl<sub>3</sub>); <sup>1</sup>H NMR (500 MHz, CDCl<sub>3</sub>, δ<sub>H</sub>) 8.11–8.03 (m, 3H, Ar), 7.59–7.10 (m, 17H, Ar), 6.99–6.96 (m, 2H, Ar), 6.83–6.80 (m, 2H, Ar),

5.93–5.85 (m, 1H, =CH), 5.67–5.66 (m, 1H, H-2'''), 5.38 (d, 1H,  $J_{1,2} = 1.7$  Hz, H-1), 5.32 (d, 1H,  $J_{1',2'} = 1.8$  Hz, H-1'), 5.27–5.23 (m, 1H, =CH<sub>2</sub>), 5.16–5.14 (m, 3H, H-1'', H-1''', =CH<sub>2</sub>), 5.11, 4.66 (ABq, 2H,  $J = 11.8$  Hz, ArCH<sub>2</sub>), 4.78, 4.50 (ABq, 2H,  $J = 12.0$  Hz, ArCH<sub>2</sub>), 4.73, 4.53 (ABq, 2H,  $J = 11.75$  Hz, ArCH<sub>2</sub>), 4.68–4.61 (m, 1H, H-5''), 4.59 (dd, 1H,  $J_{2'',3''} = 9.7$  Hz,  $J_{3'',4''} = 2.7$  Hz, H-3''), 4.33–4.29 (m, 1H, CH<sub>2</sub>O), 4.23–4.18 (m, 2H, H-5', CH<sub>2</sub>O), 4.09–4.04 (m, 2H, H-6''' x 2), 3.99–3.94 (m, 2H, H-3, H-5), 3.88–3.84 (m, 2H, H-3', H-5'''), 3.76 (s, 3H, OCH<sub>3</sub>), 3.73–3.67 (m, 4H, H-2, H-2', H-2'', H-3'''), 3.54 (s, 3H, OCH<sub>3</sub>), 3.53 (s, 3H, OCH<sub>3</sub>), 3.49 (s, 3H, OCH<sub>3</sub>), 3.43 (s, 3H, OCH<sub>3</sub>), 3.37–3.32 (m, 2H, H-4', H-4''), 3.30 (s, 3H, OCH<sub>3</sub>), 3.24–3.16 (m, 2H, H-4, H-4'''), 1.31 (d, 3H,  $J_{6',5'} = 6.2$  Hz, H-6'), 1.26 (d, 3H,  $J_{6,5} = 6.2$  Hz, H-6), 1.19 (d, 3H,  $J_{6'',5''} = 6.5$  Hz, H-6''); <sup>13</sup>C NMR (125.7 MHz, CDCl<sub>3</sub>, δ<sub>C</sub>) 165.5 (C=O), 154.9 (Ar), 150.5 (Ar), 139.1 (Ar), 138.6 (Ar), 138.0 (Ar), 135.1 (=CH), 133.3 (Ar), 130.0 (Ar), 129.9 (Ar), 128.4 (Ar x 2), 128.3 (Ar), 128.2(9) (Ar), 128.2(6) (Ar), 128.1 (Ar x 2), 128.0 (Ar), 127.9 (Ar), 127.6 (Ar), 127.4 (Ar x 2), 127.4 (Ar x 2), 127.3 (Ar x 2), 127.1 (Ar), 126.3 (Ar), 117.4(9) (Ar x 2), 117.4(8) (=CH<sub>2</sub>), 114.6 (Ar x 2), 99.7, 99.3, 98.5, 95.6, 82.0, 80.7, 80.2, 80.0, 79.8, 79.5, 79.4, 78.9, 77.6, 76.3, 75.9, 74.4, 74.1, 73.9, 73.5, 71.7, 71.4, 71.1, 69.5, 68.9, 68.7, 61.2 (OCH<sub>3</sub>), 58.9 (OCH<sub>3</sub>), 58.6 (OCH<sub>3</sub>), 57.7 (OCH<sub>3</sub>), 57.4 (OCH<sub>3</sub>), 55.7 (OCH<sub>3</sub>), 18.1(9), 18.1(6), 16.7. HRMS (ESI) Calcd. for (M + Na)<sup>+</sup> C<sub>67</sub>H<sub>84</sub>NaO<sub>20</sub>: 1231.5448. Found 1231.5437.

#### 4-(1-Hydroxynonadecyl) anisole (S42)

To a solution of mechanically activated magnesium turnings (1.07 g, 44.98 mmol) in anhydrous THF (2 mL) in a three-necked rounded bottom flask was added 1-bromooctadecane (1 mL from a solution of 5 g in 20 mL anhydrous THF, 14.99 mmol) and the solution was gently warmed until it started to reflux by itself. The remainder of 1-bromooctadecane solution (19 mL) was added dropwise over 20 min while the reaction mixture continued to reflux. After the addition was complete, the reaction mixture was heated at reflux for an 1 h. After 1 h, the reaction mixture was cooled to rt and *p*-anisaldehyde (2.75 mL, 22.48 mmol) was added dropwise over 10 min. After the addition was complete, the reaction mixture was heated at reflux for 1 h.

Then, the solution was cooled to rt and the excess Grignard reactant was quenched carefully by the addition of ice-cold water (50 mL). The solution was then diluted with CH<sub>2</sub>Cl<sub>2</sub> (100 mL), washed with 1M HCl soln (2 x 50 mL), water (2 x 50 mL) and brine (75 mL). The organic layer was dried (Na<sub>2</sub>SO<sub>4</sub>), filtered, concentrated and the resulting residue was purified by chromatography (7:1 hexane–EtOAc) to afford **S42** (4.38 g, 75%) as an amorphous solid: *R<sub>f</sub>* 0.48 (7:1 hexane–EtOAc); <sup>1</sup>H NMR (400 MHz, CDCl<sub>3</sub>, δ<sub>H</sub>) 7.30–7.27 (m, 2H, Ar-2,6), 6.92–6.89 (m, 2H, Ar-3,5), 4.63 (dt, 1H, *J* = 7.1 Hz, *J* = 3.1 Hz, H-1'), 3.83 (s, 3H, OCH<sub>3</sub>), 1.85–1.79 (m, 1H, H-2'a), 1.78 (d, 1H, *J* = 2.6 Hz, OH), 1.73–1.76 (m, 1H, H-2'b), 1.43–1.27 (m, 32H, CH<sub>2</sub> x 16), 0.91 (t, 3H, *J*<sub>18',19'</sub> = 7.0 Hz, CH<sub>3</sub>-19'); <sup>13</sup>C NMR (125.7 MHz, CDCl<sub>3</sub>, δ<sub>C</sub>) 159.0 (Ar), 137.1 (Ar), 127.2 (Ar x 2), 113.8 (Ar x 2), 74.3, 55.3 (OCH<sub>3</sub>), 39.0, 32.0, 29.7(2) (CH<sub>2</sub> x 8), 29.6(8), 29.6(2), 29.5(8), 29.5(6), 29.4, 25.9, 22.7, 14.2. HRMS (ESI) Calcd for (M–H<sub>2</sub>O)<sup>+</sup> C<sub>26</sub>H<sub>44</sub>O: 372.3392. Found 372.3393

#### 4-Nonadecylanisole (**S43**)

To a solution of **S42** (0.78 g, 2 mmol) and Me<sub>3</sub>SiH (0.5 mL, 4 mmol) in dry CH<sub>2</sub>Cl<sub>2</sub> (4 mL) at 0°C, BF<sub>3</sub>·Et<sub>2</sub>O (0.5 mL, 4 mmol) was added and the reaction mixture was stirred for 1 h. The Lewis acid was quenched by the addition of sat. aq. NaHCO<sub>3</sub> soln (10 mL), and the mixture was diluted with CH<sub>2</sub>Cl<sub>2</sub> (20 mL), and then washed with water (2 x 10 mL) and brine (10 mL). The organic layer was dried (Na<sub>2</sub>SO<sub>4</sub>), filtered, concentrated and the resulting residue was purified by chromatography (10:1 hexane–EtOAc) to afford **S43** (0.71 g, 94%) as an amorphous solid: *R<sub>f</sub>* 0.51 (10:1 hexane–EtOAc); <sup>1</sup>H NMR (400 MHz, CDCl<sub>3</sub>, δ<sub>H</sub>) 7.11–7.07 (m, 2H, Ar-3,5), 6.84–6.80 (m, 2H, Ar-2,6), 3.79 (s, 3H, OCH<sub>3</sub>), 2.54 (t, 2H, *J*<sub>1',2'</sub> = 7.6 Hz, CH<sub>2</sub>-1'), 1.59–1.54 (m, 2H, CH<sub>2</sub>-2'), 1.31–1.26 (m, 32H, CH<sub>2</sub> x 16), 0.89 (t, 3H, *J*<sub>18',19'</sub> = 7.0 Hz, CH<sub>3</sub>-19'); <sup>13</sup>C NMR (125.7 MHz, CDCl<sub>3</sub>, δ<sub>C</sub>) 157.2 (Ar), 134.7 (Ar), 128.8 (Ar x 2), 113.2 (Ar x 2), 54.9 (OCH<sub>3</sub>), 34.7, 31.5, 31.4, 29.3 (CH<sub>2</sub> x 11), 29.2, 20.1, 29.0, 28.9, 22.3. HRMS Calcd for (ESI) (M)<sup>+</sup> C<sub>26</sub>H<sub>46</sub>O: 374.3549. Found 374.3546.

#### ***p*-Tolyl 4-*O*-methyl-1-thio- $\alpha$ -L-rhamnopyranoside (S44)**

To a solution of **S18** (0.64 g, 2.1 mmol) in DMF (10 mL) and CH<sub>3</sub>I (0.21 mL, 3.32 mmol), NaH (60% in mineral oil, 106 mg, 4.43 mmol) was added at 0 °C and then the reaction mixture was stirred for additional 1 h at rt. The mixture was diluted with chilled water (30 mL) and CH<sub>2</sub>Cl<sub>2</sub> (30 mL) and the organic layer was washed with water (2 x 20 mL) and brine (20 mL) before being dried (NaSO<sub>4</sub>), filtered and concentrated. The resulting oil was dissolved 1:1 CH<sub>3</sub>OH–CH<sub>2</sub>Cl<sub>2</sub> (10 mL) and *p*-TSA (20 mg) was added. The reaction mixture was stirred for 3 h at rt before Et<sub>3</sub>N (0.5 mL) was added. The solution was concentrated, and the resulting residue was purified by chromatography (1:1 hexane–EtOAc) to afford **S44** (0.53 g, 84%) as an amorphous solid: *R*<sub>f</sub> 0.29 (1:1 hexane–EtOAc); [ $\alpha$ ]<sub>D</sub> –28.9 (c 0.2, CHCl<sub>3</sub>); <sup>1</sup>H NMR (400 MHz, CDCl<sub>3</sub>,  $\delta$ <sub>H</sub>) 7.37–7.34 (m, 2H, Ar-2,6), 7.13–7.11 (m, 2H, Ar-3,5), 5.41 (d, 1H, *J*<sub>1,2</sub> = 1.8 Hz, H-1), 4.20 (dd, 1H, *J*<sub>1,2</sub> = 1.8 Hz, *J*<sub>2,3</sub> = 3.3 Hz, H-2), 4.15 (dq, 1H, *J*<sub>4,5</sub> = 9.5 Hz, *J*<sub>5,6</sub> = 6.3 Hz, H-5), 3.89 (dd, 1H, *J*<sub>2,3</sub> = 3.3 Hz, *J*<sub>3,4</sub> = 9.5 Hz, H-3), 3.59 (s, 3H, OCH<sub>3</sub>), 3.18 (app t, 1H, *J*<sub>3,4</sub> = *J*<sub>4,5</sub> = 9.5 Hz, H-4), 2.34 (s, 3H, ArCH<sub>3</sub>), 1.34 (d, 3H, *J*<sub>5,6</sub> = 6.2 Hz, H-6); <sup>13</sup>C NMR (125.7 MHz, CDCl<sub>3</sub>,  $\delta$ <sub>C</sub>) 137.9 (Ar), 132.3 (Ar x 2), 130.5 (Ar), 130.07 (Ar x 2), 88.1, 83.7, 72.8, 71.9, 68.8, 61.0 (OCH<sub>3</sub>), 21.4, 18.1. HRMS (ESI) Calcd for (M + Na)<sup>+</sup> C<sub>14</sub>H<sub>20</sub>O<sub>4</sub>NaS: 307.0975. Found 307.0977.

#### ***p*-Tolyl 2-*O*-acetyl-4-*O*-benzyl-1-thio- $\alpha$ -L-rhamnopyranoside (S45)**

To a solution of **S19** (0.99 g, 2.75 mmol) and triethyl orthoacetate (1.02 mL, 5.55 mmol) in CH<sub>2</sub>Cl<sub>2</sub> (20 mL) was added CSA (128 mg, 0.55 mmol). The reaction mixture was stirred for 2 h at rt before it was concentrated and dissolved in 80% HOAc and stirred for additional 30 min at rt. Water (10 mL) was added and the mixture was concentrated, diluted with CH<sub>2</sub>Cl<sub>2</sub> (20 mL) and washed with water (2 x 20 mL). The organic layer was separated, dried (Na<sub>2</sub>SO<sub>4</sub>), filtered and concentrated to a syrup, which was purified by chromatography (4:1 hexane–EtOAc) to give **S45** (0.96 g, 87%) as a colorless oil: *R*<sub>f</sub> 0.31 (1:2 hexane–EtOAc); [ $\alpha$ ]<sub>D</sub> –133.4 (c 0.2, CHCl<sub>3</sub>); <sup>1</sup>H NMR (400 MHz, CDCl<sub>3</sub>,  $\delta$ <sub>H</sub>) 7.39–7.28 (m, 7H, Ar), 7.13 (d, 2H, *J* =

8.1 Hz, Ar-2,6), 5.40–5.37 (m, 2H, H-1, H-2), 4.79, 4.68 (ABq,  $J = 11.2$  Hz, ArCH<sub>2</sub>), 4.26 (dq, 1H,  $J_{4,5} = 9.4$  Hz,  $J_{5,6} = 6.2$  Hz, H-5), 4.16–4.10 (m, 1H, H-3), 3.46 (app t, 1H,  $J_{3,4} = J_{4,5} = 9.4$  Hz, H-4), 2.36 (s, 3H, ArCH<sub>3</sub>), 2.28 (d, 1H,  $J_{3,\text{OH-3}} = 5.1$  Hz, OH-3), 2.16 (s, 3H, CH<sub>3</sub>CO), 1.37 (d, 3H,  $J_{5,6} = 6.2$  Hz, H-6); <sup>13</sup>C NMR (125.7 MHz, CDCl<sub>3</sub>, δ<sub>C</sub>) 170.9 (C=O), 138.4 (Ar), 138.2 (Ar), 132.6 (Ar x 2), 130.3 (Ar), 130.1 (Ar), 128.8 (Ar x 2), 128.3 (Ar), 128.2(2) (Ar), 128.1(4) (Ar x 2), 86.5, 82.2, 75.5, 74.6, 71.0, 68.9, 21.4, 21.3, 18.1. HRMS (ESI) Calcd for (M + Na)<sup>+</sup> C<sub>22</sub>H<sub>26</sub>O<sub>5</sub>NaS: 425.1393. Found 425.1405.

#### 4-Nonadecylphenyl 2-O-acetyl-4-O-methyl-α-L-rhamnopyranoside (S46)

To a solution of **S7** (385 mg, 0.91 mmol) and **35** (396 mg, 1.1 mmol) in CH<sub>2</sub>Cl<sub>2</sub> (20 mL) were added crushed 4 Å molecular sieves (200 mg). After stirring at rt for 30 min, the solution was cooled to –20 °C and then NIS (206 mg, 0.92 mmol) and AgOTf (62 mg, 0.24 mmol) were added. The reaction mixture was then stirred for another 30 min before the addition of Et<sub>3</sub>N (1 mL). The solution was concentrated to a crude residue that was dissolved in CH<sub>2</sub>Cl<sub>2</sub> (20 mL) and NH<sub>2</sub>NH<sub>2</sub>·HOAc (126 mg, 1.36 mmol) was added. The reaction mixture was stirred for 5h at rt before it was concentrated and the resulting residue was purified by chromatography (2:1 hexane–EtOAc) to give **S46** (337 mg, 66%) as a colorless oil:  $R_f$  0.28 (2:1 hexanes–EtOAc);  $[\alpha]_D -3.6$  (c 0.1, CHCl<sub>3</sub>); <sup>1</sup>H NMR (500 MHz, CDCl<sub>3</sub>, δ<sub>H</sub>) 7.08–7.05 (m, 2H, Ar-2,6), 6.94–6.91 (m, 2H, Ar-3,5), 5.40 (d, 1H,  $J_{1,2} = 1.8$  Hz, H-1), 5.26 (dd, 1H,  $J_{1,2} = 1.8$  Hz,  $J_{2,3} = 3.6$  Hz, H-2), 4.22 (dd, 1H,  $J_{2,3} = 3.6$  Hz,  $J_{3,4} = 9.5$  Hz, H-3), 3.79 (dq, 1H,  $J_{4,5} = 9.5$  Hz,  $J_{5,6} = 6.4$  Hz, H-5), 3.59 (s, 3H, OCH<sub>3</sub>), 3.13 (app t, 1H,  $J_{3,4} = J_{4,5} = 9.5$  Hz, H-4), 2.53 (t, 2H,  $J_{1',2'} = 7.6$  Hz, CH<sub>2</sub>-1'), 2.18 (s, 3H, CH<sub>3</sub>CO), 1.59–1.53 (m, 2H, CH<sub>2</sub>-2'), 1.26 (d, 3H,  $J_{5,6} = 6.4$  Hz, H-6), 1.29–1.24 (m, 32H, CH<sub>2</sub> x 16), 0.87 (t, 3H,  $J_{18',19'} = 6.6$  Hz, CH<sub>3</sub>-19'); <sup>13</sup>C NMR (125.7 MHz, CDCl<sub>3</sub>, δ<sub>C</sub>) 170.7 (C=O), 154.2 (Ar), 137.0 (Ar), 129.3 (Ar x 2), 116.3 (Ar x 2), 95.8, 83.3, 72.5, 69.8, 68.1, 60.9 (OCH<sub>3</sub>), 35.1, 31.9, 31.6, 29.7 (CH<sub>2</sub> x 10), 29.6, 29.5, 29.4, 29.3, 22.7, 21.0, 18.0, 14.1. HRMS (ESI) Calcd for (M + Na)<sup>+</sup> C<sub>34</sub>H<sub>58</sub>O<sub>6</sub>Na: 585.4126. Found 585.4122.

***p*-Nonadecylphenyl 2-*O*-acetyl-4-*O*-benzyl-3-*O*-levulinoyl- $\alpha$ -L-rhamnopyranosyl-(1 $\rightarrow$ 3)-2-*O*-acetyl-4-*O*-methyl- $\alpha$ -L-rhamnopyranoside(S47)**

To a solution of **S8** (225 mg, 0.45 mmol) and **S46** (309.1 mg, 0.55 mmol) in CH<sub>2</sub>Cl<sub>2</sub> (20 mL), crushed 4Å molecular sieves (200 mg) were added. After the reaction mixture was stirred at rt for 30 min, it was cooled to -20 °C, and then NIS (103.5 mg, 0.46 mmol) and AgOTf (30.8 mg, 0.12 mmol) were added. The reaction mixture was stirred for 30 min before the addition of Et<sub>3</sub>N (1 mL). The solution was filtered and concentrated to a crude residue that was purified by chromatography (2:1 hexane–EtOAc) to give **S47** (333 mg, 79%) as a colorless oil: *R<sub>f</sub>* 0.45 (2:1 hexane–EtOAc); [ $\alpha$ ]<sub>D</sub> -39.7 (c 0.1, CHCl<sub>3</sub>); <sup>1</sup>H NMR (500 MHz, CDCl<sub>3</sub>,  $\delta$ <sub>H</sub>) 7.36–7.25 (m, 5H, Ar), 7.07–7.04 (m, 2H, Ar-2,6), 6.92–6.90 (m, 2H, Ar-3,5), 5.36 (d, 1H, *J*<sub>1,2</sub> = 1.8 Hz, H-1), 5.30–5.26 (m, 3H, H-2, H-2', H-3'), 5.02 (d, 1H, *J*<sub>1',2'</sub> = 1.8 Hz, H-1'), 4.72, 4.63 (ABq, 2H, *J* = 11.4 Hz, ArCH<sub>2</sub>), 4.16 (dd, 1H, *J*<sub>2,3</sub> = 3.5 Hz, *J*<sub>3,4</sub> = 9.5 Hz, H-3), 3.87 (dq, 1H, *J*<sub>4',5'</sub> = 9.5 Hz, *J*<sub>5',6'</sub> = 6.3 Hz, H-5'), 3.75 (dq, 1H, *J*<sub>4,5</sub> = 9.6 Hz, *J*<sub>5,6</sub> = 6.2 Hz, H-5), 3.56 (s, 3H, OCH<sub>3</sub>), 3.51 (app t, 1H, *J*<sub>3',4'</sub> = *J*<sub>4',5'</sub> = 9.5 Hz, H-4'), 3.21 (app t, 1H, *J*<sub>3,4</sub> = *J*<sub>4,5</sub> = 9.5 Hz, H-4), 2.76–2.63 (m, 2H, CH<sub>2</sub>-1''), 2.54–2.44 (m, 4H, CH<sub>2</sub>CO, CH<sub>2</sub>COO), 2.17 (s, 3H, CH<sub>3</sub>CO), 2.15 (s, 3H, CH<sub>3</sub>CO), 2.14 (s, 3H, CH<sub>3</sub>CO), 1.57–1.54 (m, 2H, CH<sub>2</sub>-2<sub>agly</sub>), 1.31–1.24 (m, 38H, H-6 x 3, H-6' x 3, CH<sub>2</sub> x 16), 0.87 (t, 3H, *J*<sub>18,19</sub> = 7.0 Hz, CH<sub>3</sub>-19<sub>agly</sub>); <sup>13</sup>C NMR (125.7 MHz, CDCl<sub>3</sub>,  $\delta$ <sub>C</sub>) 206.1 (C=O), 171.8 (C=O), 170.4 (C=O), 170.0 (C=O), 154.1 (Ar), 138.2 (Ar), 137.0 (Ar), 129.3 (Ar x 2), 128.4 (Ar x 2), 127.8 (Ar x 2), 127.7 (Ar), 116.3 (Ar x 2), 99.5, 95.6, 82.1, 78.4, 77.3, 74.6, 71.9, 71.8, 70.4, 68.5, 68.5, 37.9, 35.1, 31.9, 31.6, 29.8, 29.7 (CH<sub>2</sub> x 10), 29.6, 29.5, 29.4, 29.3, 28.0, 22.7, 21.0, 20.9, 17.9, 17.8, 14.1. HRMS (ESI) Calcd for (M + Na)<sup>+</sup> C<sub>54</sub>H<sub>82</sub>O<sub>13</sub>Na: 961.5640. Found 961.5648.

***p*-Nonadecylphenyl 2,4-di-*O*-methyl- $\alpha$ -L-fucopyranosyl-(1 $\rightarrow$ 3)-2-*O*-acetyl-4-*O*-benzyl- $\alpha$ -L-rhamnopyranosyl-(1 $\rightarrow$ 3)-2-*O*-acetyl-4-*O*-methyl- $\alpha$ -L-rhamnopyranoside (S48)**

To a solution of **S47** (150 mg, 0.16 mmol) in CH<sub>2</sub>Cl<sub>2</sub> (20 mL) was added NH<sub>2</sub>NH<sub>2</sub>·HOAc (22 mg, 0.24 mmol) and the reaction mixture was stirred for 5 h at rt. The solution was filtered, concentrated and the

resulting residue was purified by chromatography (2:1 hexane–EtOAc) to give a colorless oil. Next, two solutions were prepared. Solution A was prepared by dissolving the product of the  $\text{NH}_2\text{NH}_2 \cdot \text{HOAc}$  reaction in  $\text{CH}_2\text{Cl}_2$  (10 mL) and crushed 4Å molecular sieves (100 mg) was added. Solution B was prepared by dissolving **S9** (87 mg, 0.21 mmol) in  $\text{CH}_2\text{Cl}_2$  (10 mL) containing crushed 4Å molecular sieves (100 mg). Both solutions A and B were stirred for 30 min at rt and then solution A was cooled to  $-40\text{ }^\circ\text{C}$  before NIS (51.8 mg, 0.23 mmol) and AgOTf (15.4 mg, 0.06 mmol) were added. Solution B was then added dropwise to solution A over 10 min while stirring. The reaction mixture was stirred for additional 30 min at  $-40\text{ }^\circ\text{C}$  before  $\text{Et}_3\text{N}$  (0.25 mL) was added. The solution was filtered, concentrated and the resulting residue was dissolved in  $\text{CH}_2\text{Cl}_2$  (20 mL). To this solution at  $0\text{ }^\circ\text{C}$ , TFA (1 mL, 5 % v/v) was added and the reaction mixture was stirred for 45 min. To this solution was added  $\text{Et}_3\text{N}$  (2 mL) and the mixture was then concentrated, and the resulting crude product was purified by chromatography (1:1 hexane–EtOAc) to give **S48** (63 mg, 39 %) as a colorless oil:  $R_f$  0.49 (1:1 hexane–EtOAc);  $[\alpha]_D -29.8$  (c 0.1,  $\text{CHCl}_3$ );  $^1\text{H NMR}$  (500 MHz,  $\text{CDCl}_3$ ,  $\delta_{\text{H}}$ ) 7.34–7.25 (m, 5H, Ar), 7.06 (d, 2H,  $J = 8.6\text{ Hz}$ , Ar-2,6), 6.91 (d, 2H,  $J = 8.6\text{ Hz}$ , Ar-3,5), 5.36 (d, 1H,  $J_{1,2} = 1.8\text{ Hz}$ , H-1), 5.27 (dd, 1H,  $J_{1,2} = 1.8\text{ Hz}$ ,  $J_{2,3} = 3.5\text{ Hz}$ , H-2), 5.19 (dd, 1H,  $J_{2,3'} = 3.1\text{ Hz}$ ,  $J_{3',4'} = 1.9\text{ Hz}$ , H-2'), 5.10 (d, 1H,  $J_{1',2'} = 1.7\text{ Hz}$ , H-1'), 5.06 (d, 1H,  $J_{1'',2''} = 3.5\text{ Hz}$ , H-1''), 4.67, 4.64 (ABq, 2H,  $J = 12.0\text{ Hz}$ , Ar $\text{CH}_2$ ), 4.17 (dd, 1H,  $J_{2,3} = 3.5\text{ Hz}$ ,  $J_{3,4} = 9.5\text{ Hz}$ , H-3), 4.07–4.06 (m, 1H, H-3'), 4.02–3.99 (m, 2H, H-3'', H-5''), 3.84 (dq, 1H,  $J_{4',5'} = 9.4\text{ Hz}$ ,  $J_{5',6'} = 6.3\text{ Hz}$ , H-5'), 3.75 (dq, 1H,  $J_{4,5} = 9.5\text{ Hz}$ ,  $J_{5,6} = 6.4\text{ Hz}$ , H-5), 3.63–3.59 (m, 1H, H-2''), 3.62 (s, 3H,  $\text{OCH}_3$ ), 3.55 (s, 3H,  $\text{OCH}_3$ ), 3.49–3.46 (m, 1H, H-4'), 3.47 (s, 3H,  $\text{OCH}_3$ ), 3.99–3.98 (m, 1H, H-4''), 3.21 (app t, 1H,  $J_{3,4} = J_{4,5} = 9.5\text{ Hz}$ , H-4), 2.52 (t, 2H,  $J_{1,2} = 8.0\text{ Hz}$ ,  $\text{CH}_2$ -1 $_{\text{agly}}$ ), 2.17 (s, 3H,  $\text{CH}_3\text{CO}$ ), 1.97 (s, 3H,  $\text{CH}_3\text{CO}$ ), 1.57–1.54 (m, 2H,  $\text{CH}_2$ -2'''), 1.29–1.23 (m, 41H, H-6 x 3, H-6' x 3, H-6'' x 3,  $\text{CH}_2$  x 16), 0.87 (t, 3H,  $J_{18,19} = 6.8\text{ Hz}$ ,  $\text{CH}_3$ -19 $_{\text{agly}}$ );  $^{13}\text{C NMR}$  (125.7 MHz,  $\text{CDCl}_3$ ,  $\delta_{\text{C}}$ ) 167.9 (C=O), 167.7 (C=O), 151.6 (Ar), 135.9 (Ar), 134.5 (Ar), 126.7 (Ar x 2), 125.8 (Ar x 2), 125.1 (Ar x 3), 113.8 (Ar x 2), 98.0, 95.4, 93.2, 80.0, 79.4, 76.2, 75.9, 74.4, 73.8, 72.2, 70.8, 69.3, 67.3, 66.2, 66.0, 64.3, 59.7(4) ( $\text{OCH}_3$ ),

58.7(9) (OCH<sub>3</sub>), 54.7 (OCH<sub>3</sub>), 32.6, 29.4, 29.1, 27.2 (CH<sub>2</sub> x 10), 27.1, 27.0, 26.7(8), 26.7(4), 22.2, 21.0, 20.8, 17.9, 17.7, 16.5, 13.9. HRMS (ESI) Calcd for (M + Na)<sup>+</sup> C<sub>57</sub>H<sub>90</sub>O<sub>15</sub>Na: 1037.6178. Found 1037.6177.



## Immunological Evaluation

Immunoinhibition assay of compounds 1–17  
Pam3CSK4 [TLR2 agonist] as stimulant

### 1. IL-6

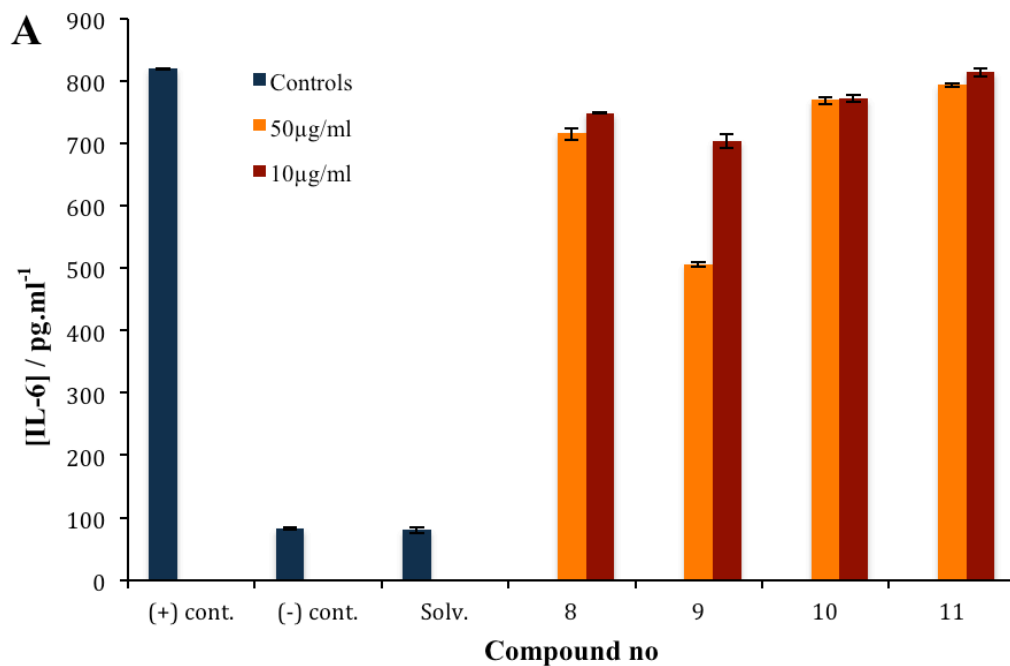

*Figure S1.* IL-6 immunoinhibition assay of compounds 8–11.

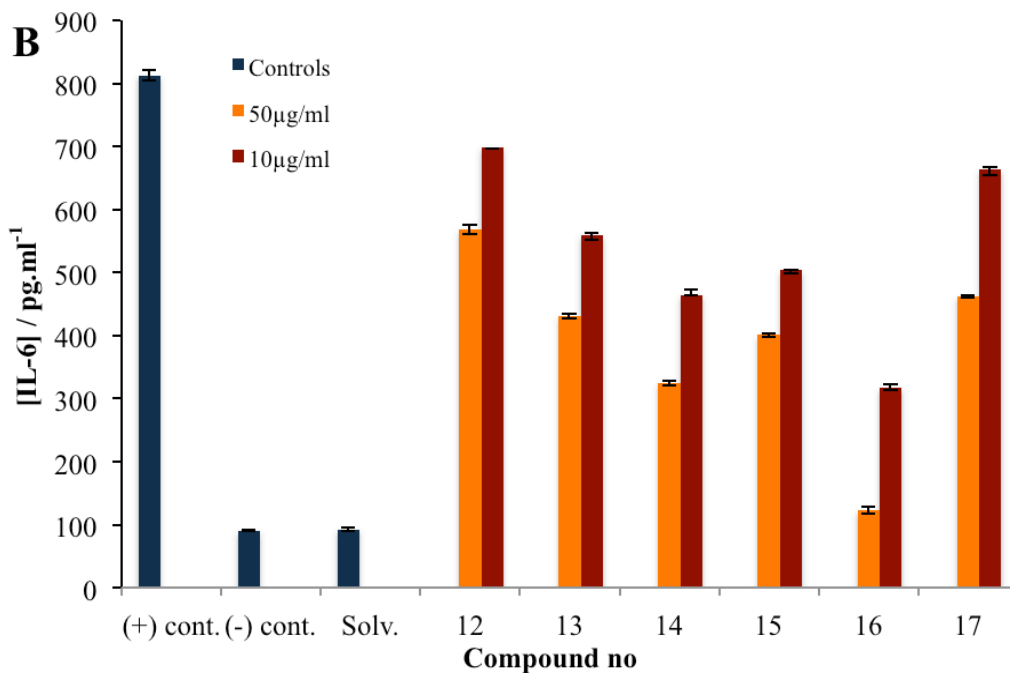

*Figure S2.* IL-6 immunoinhibition assay of compounds 12–17.

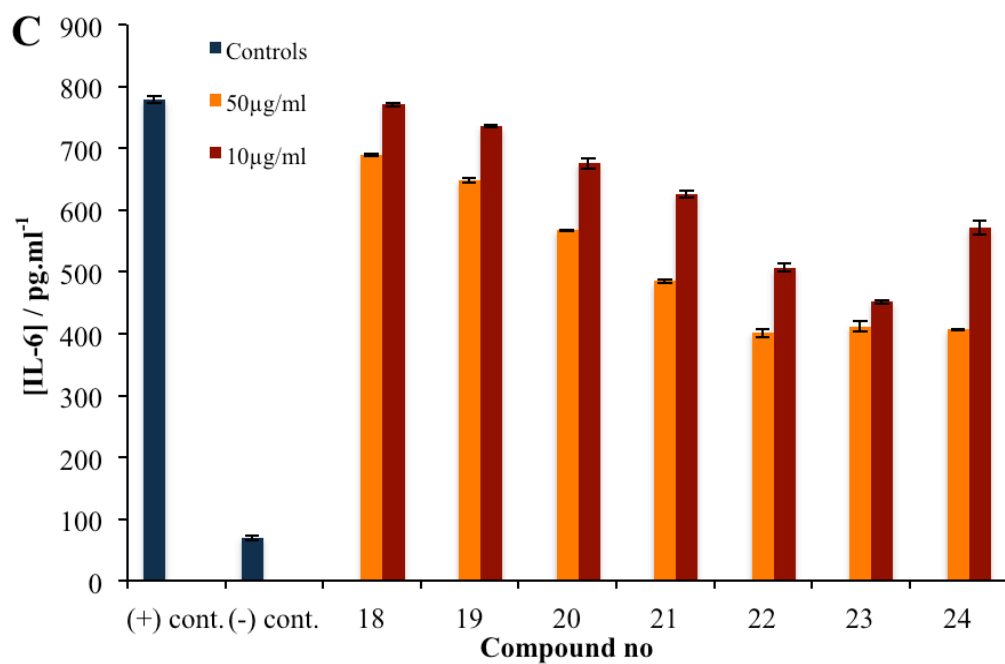

**Figure S3.** IL-6 immunoinhibition assay of compounds 18–24.

**2. IL-1 $\beta$**

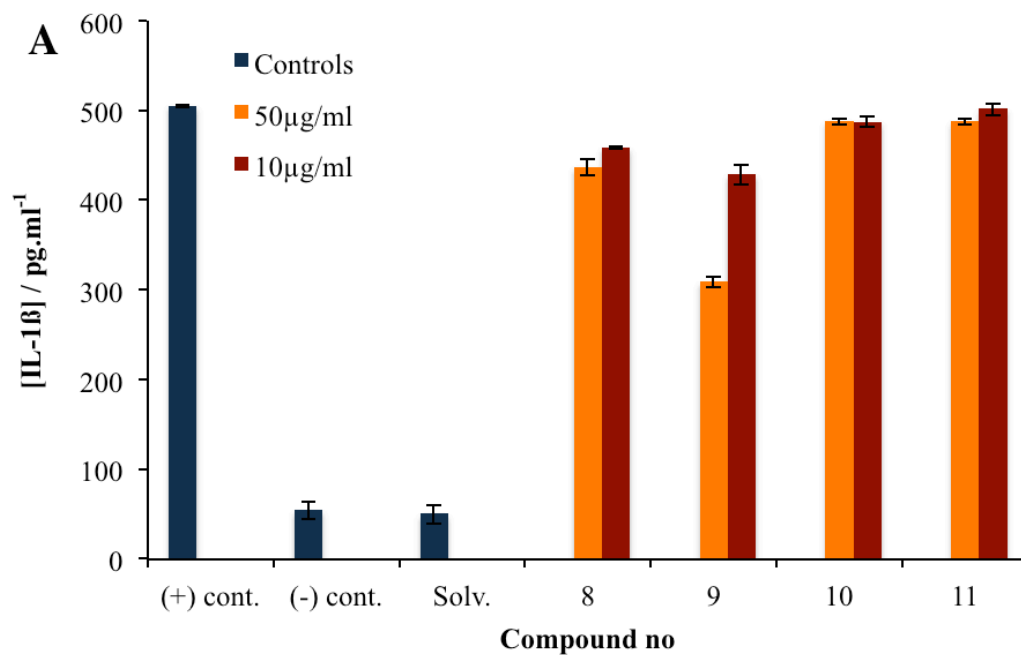

**Figure S4.** IL-1 $\beta$  immunoinhibition assay of compounds 8–11.

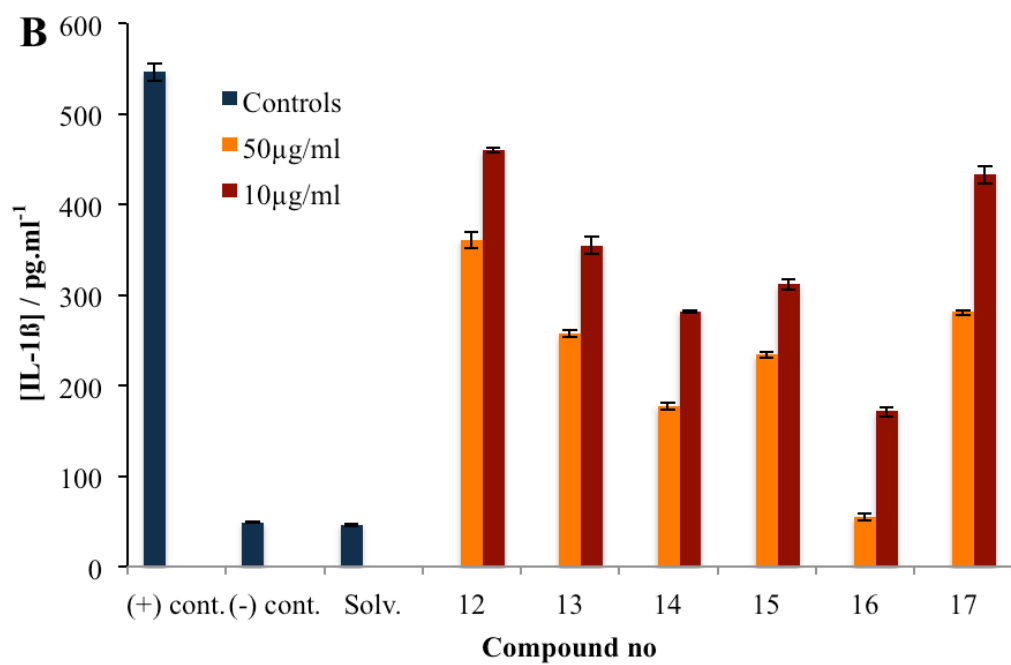

**Figure S5.** IL-1 $\beta$  immunoinhibition assay of compounds 12–17.

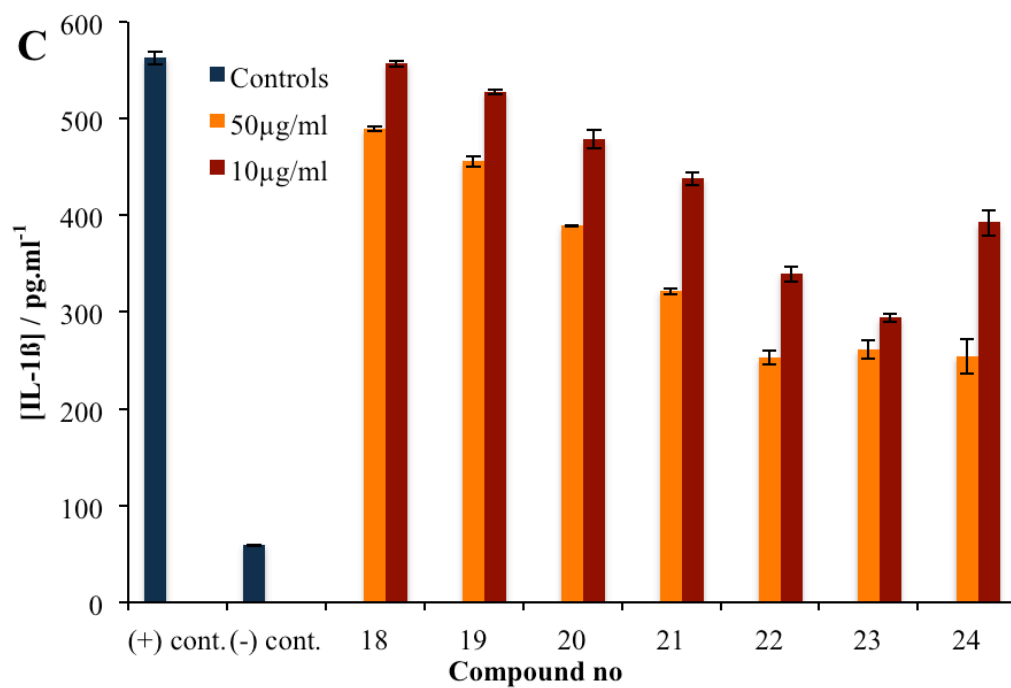

**Figure S6.** IL-1 $\beta$  immunoinhibition assay of compounds 18–24.

### 3. MCP-1

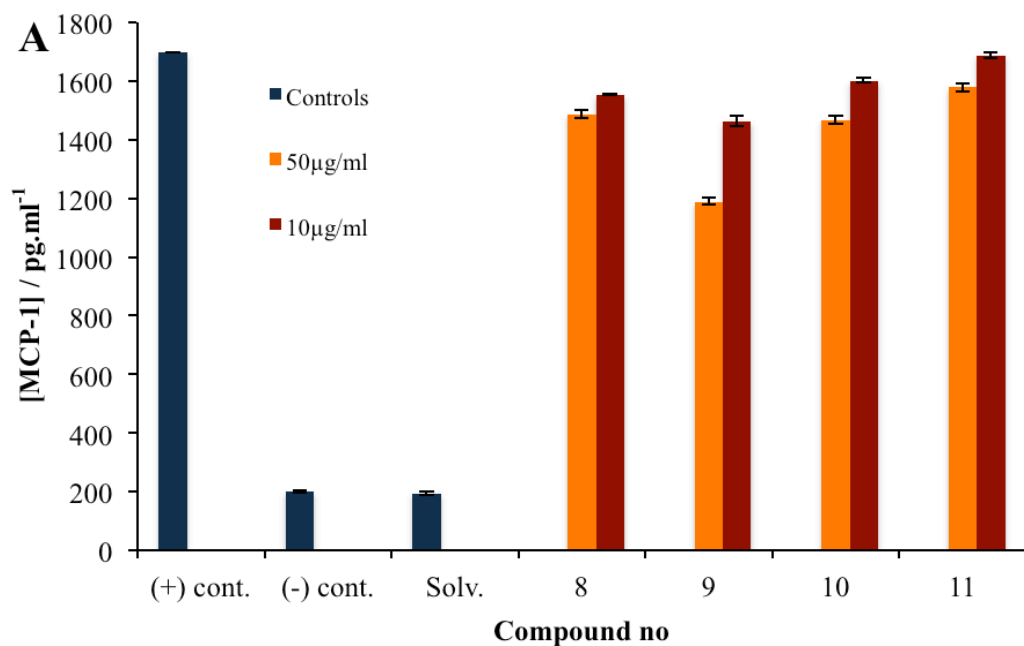

**Figure S7.** MCP-1 immunoinhibition assay of compounds 8–11.

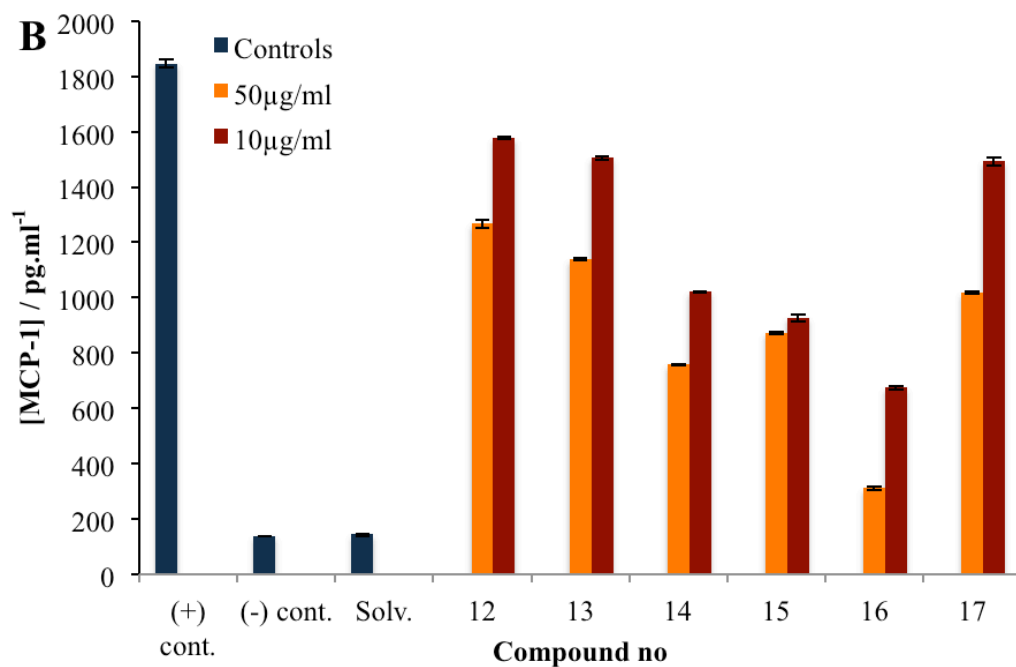

**Figure S8.** MCP-1 immunoinhibition assay of compounds 12–17.

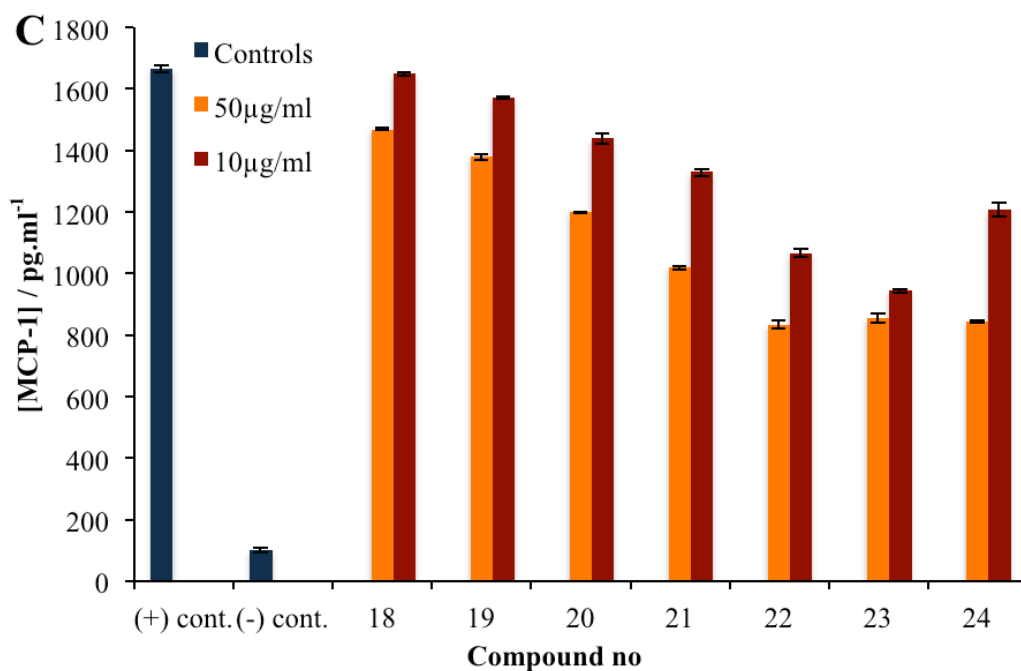

Figure S9. MCP-1 immunoinhibition assay of compounds 18–24.

#### 4. NO

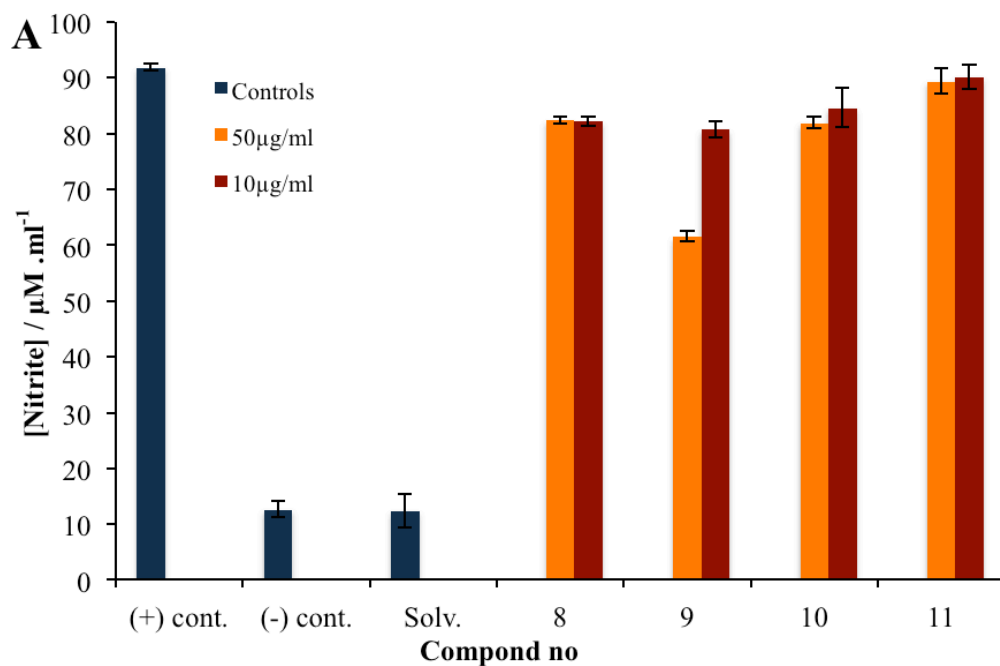

Figure S10. Nitric oxide immunoinhibition assay of compounds 8–11.

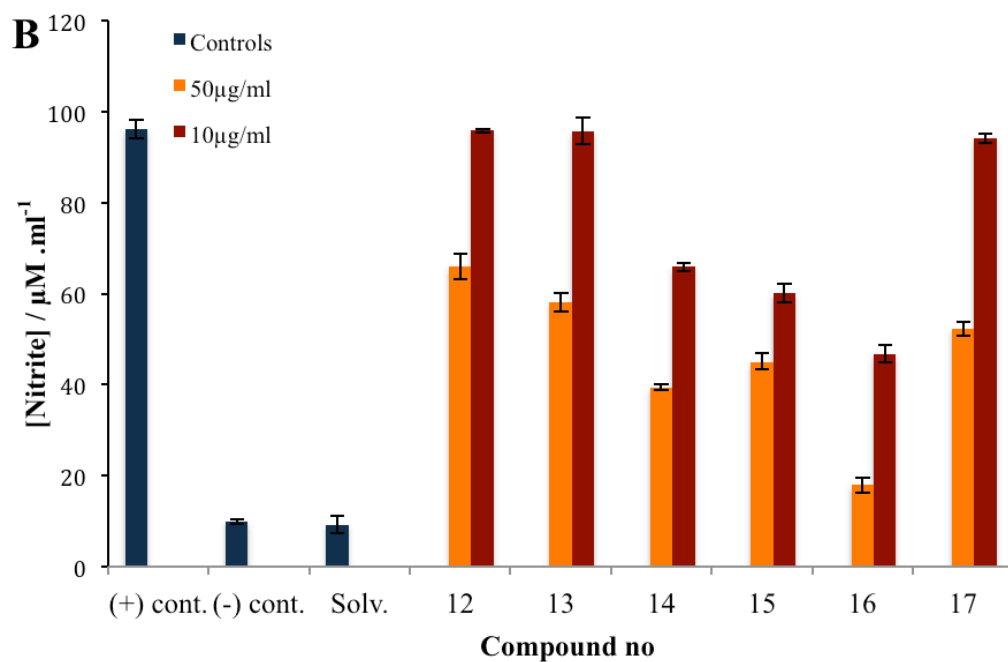

**Figure S11.** Nitric oxide immunoinhibition assay of compounds 12–17.

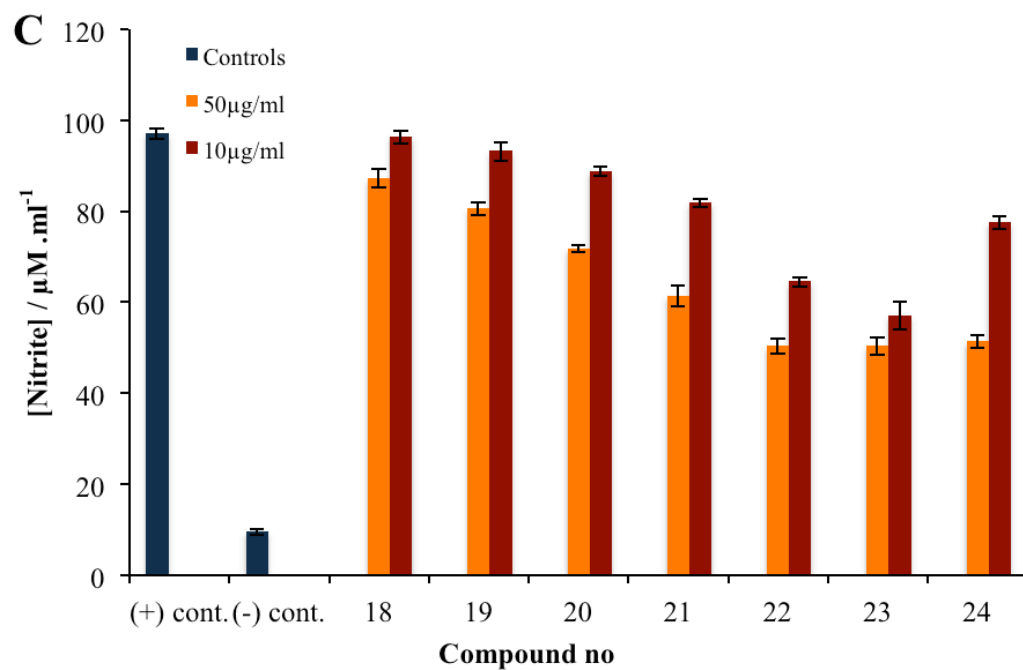

**Figure S12.** Nitric oxide immunoinhibition assay of compounds 18–24.

Immuno-inhibition assay of compounds 1–17  
Ultra pure LPS [TLR4 agonist] as stimulant

1. IL-6

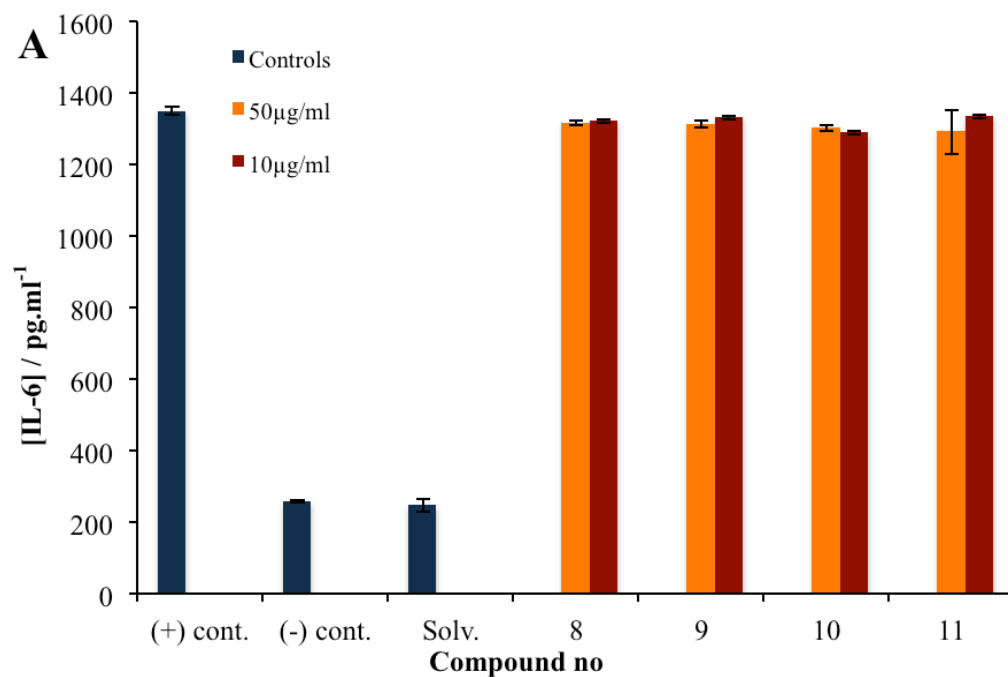

Figure S13. IL-6 immunoinhibition assay of compounds 8–11.

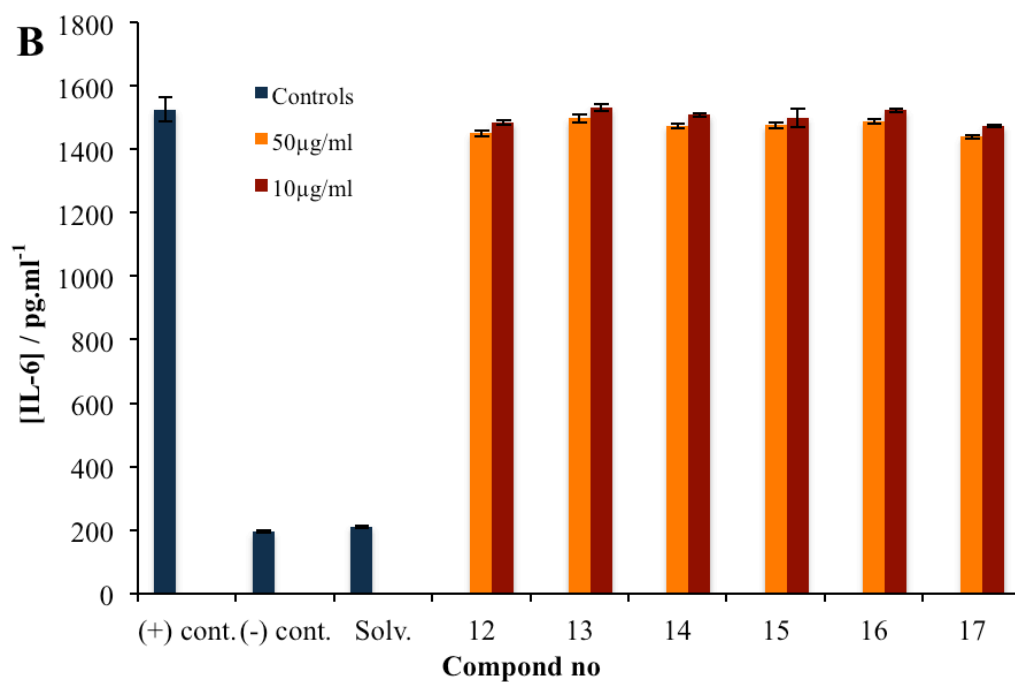

Figure S14. IL-6 immunoinhibition assay of compounds 12–17.

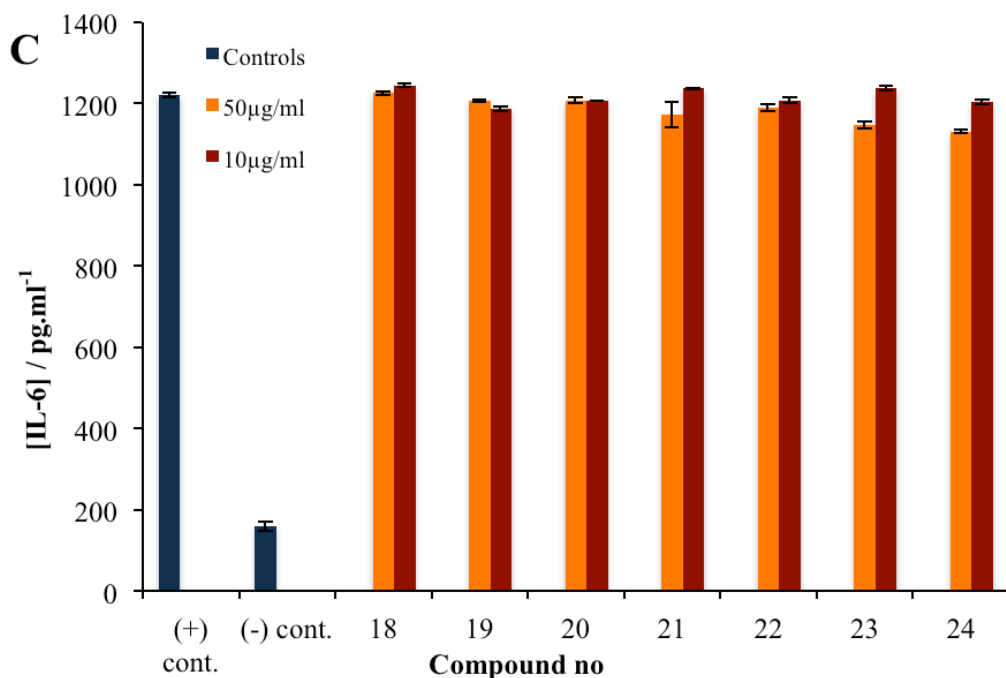

**Figure S15.** IL-6 immunoinhibition assay of compounds 18–24.

**2. IL-1β**

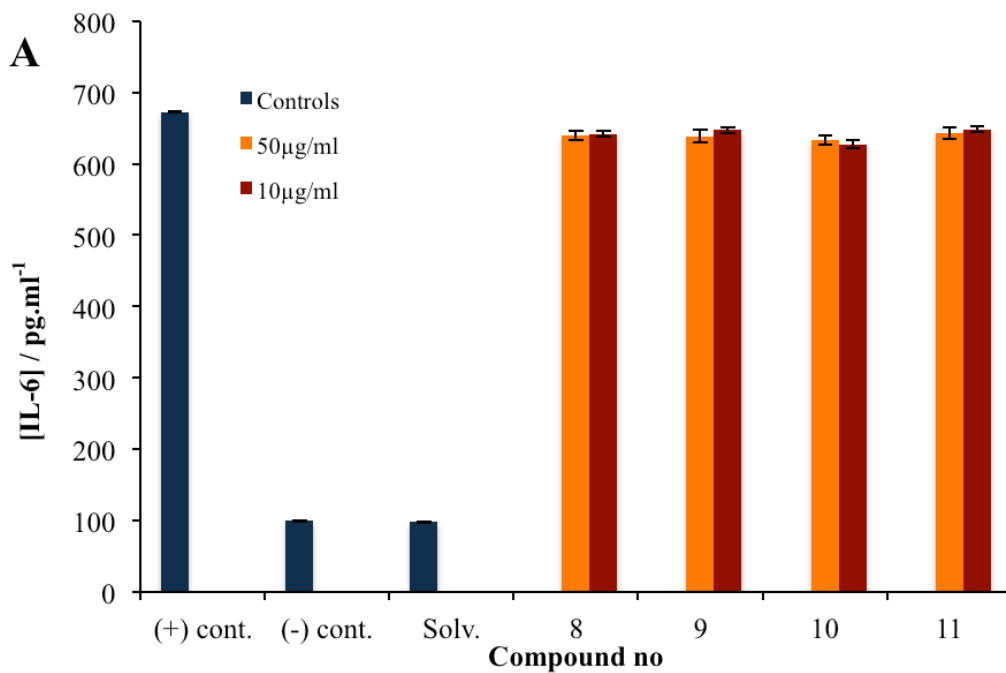

**Figure S16.** IL-1β immunoinhibition assay of compounds 8–11.



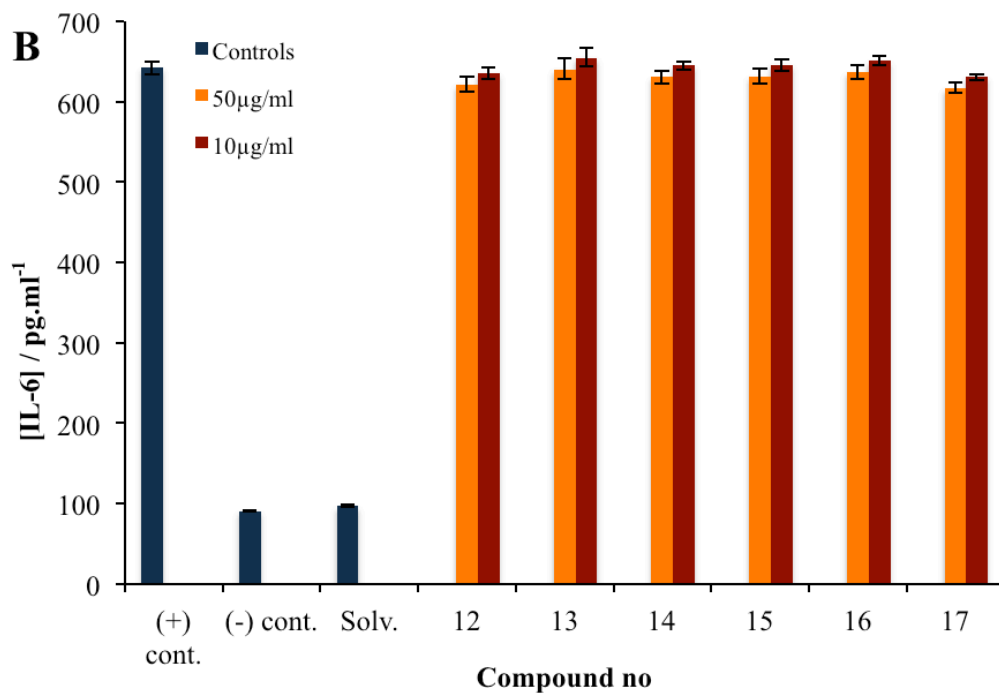

**Figure S17.** IL-1 $\beta$  immunoinhibition assay of compounds 12–17.

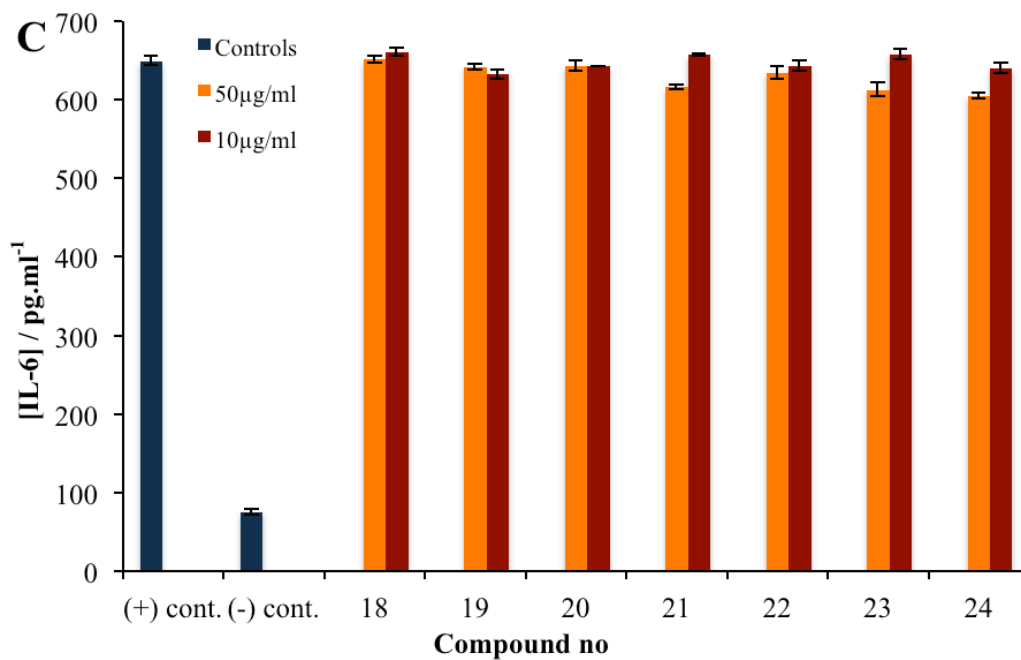

**Figure S18.** IL-1 $\beta$  immunoinhibition assay of compounds 18–24.

### 3. MCP-1

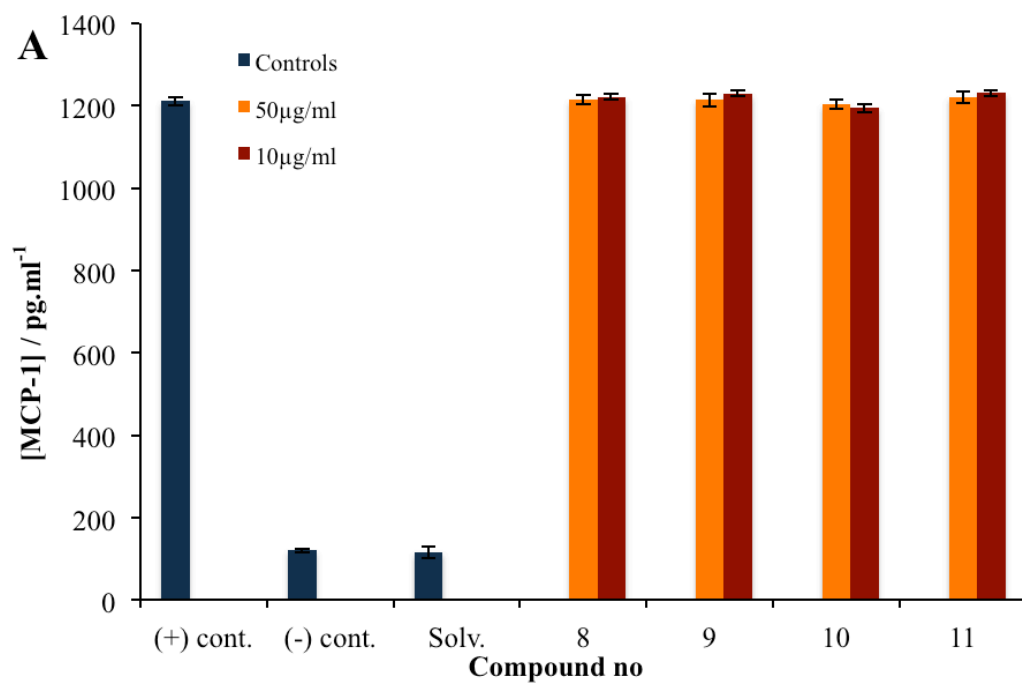

**Figure S19.** MCP-1 immunoinhibition assay of compounds 8–11.

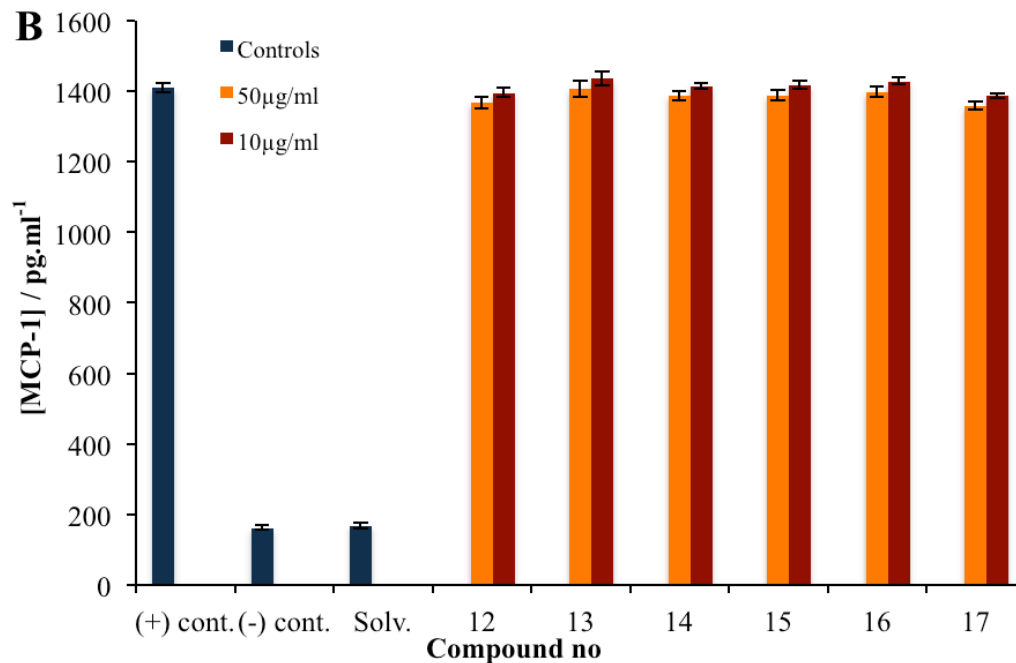

**Figure S20.** MCP-1 immunoinhibition assay of compounds 12–17.

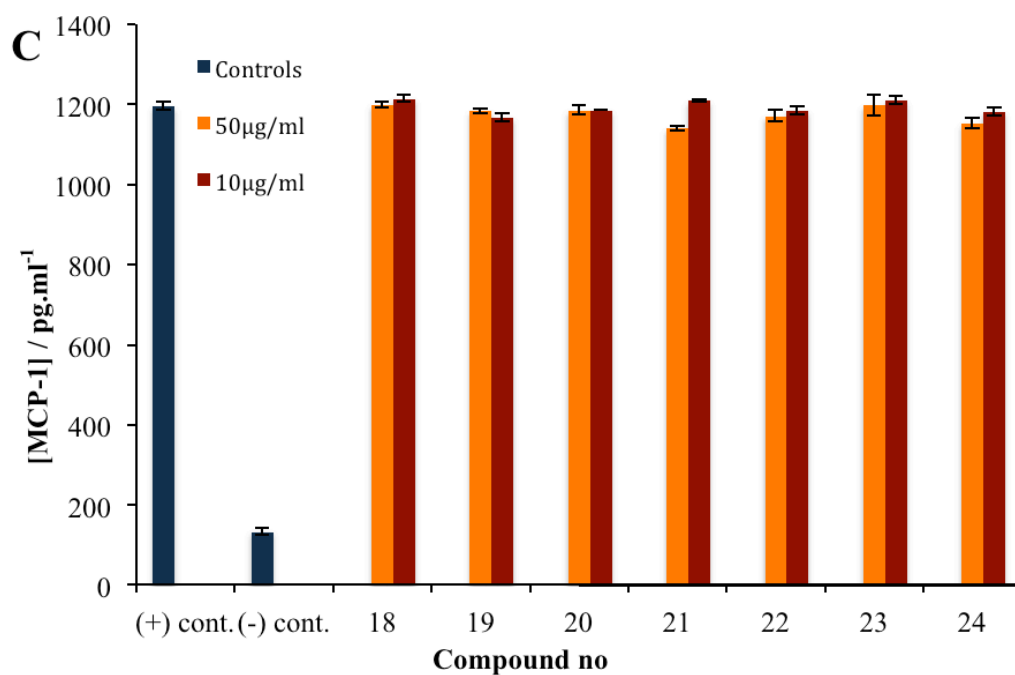

**Figure S21.** MCP-1 immunoinhibition assay of compounds **18–24**.

**4. NO**

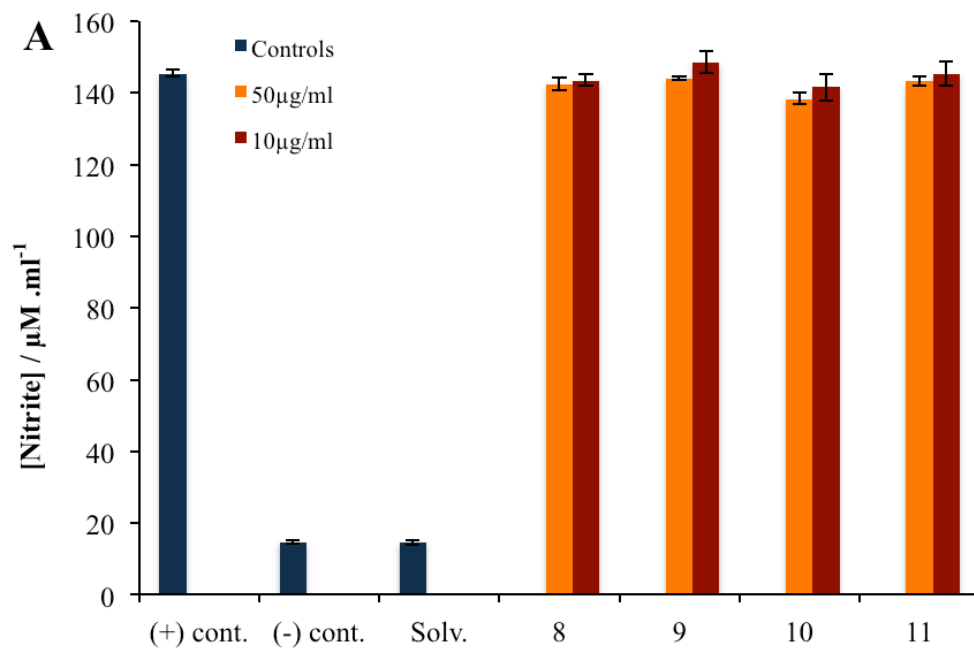

**Figure S22.** Nitric oxide immunoinhibition assay of compounds **8–11**.

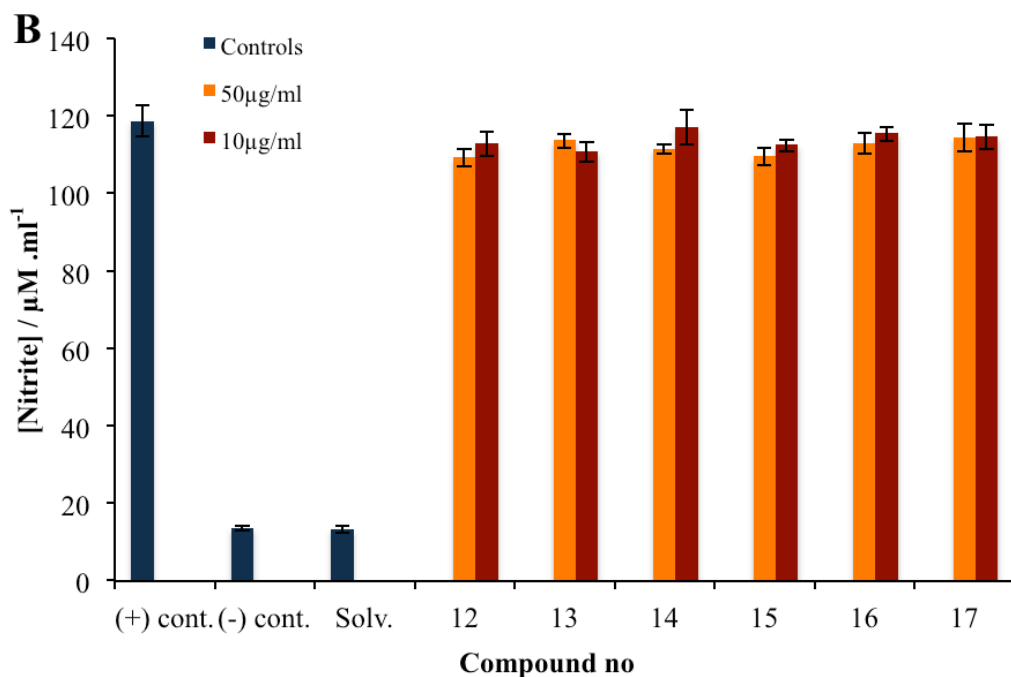

**Figure S23.** Nitric oxide immunoinhibition assay of compounds 12–17.

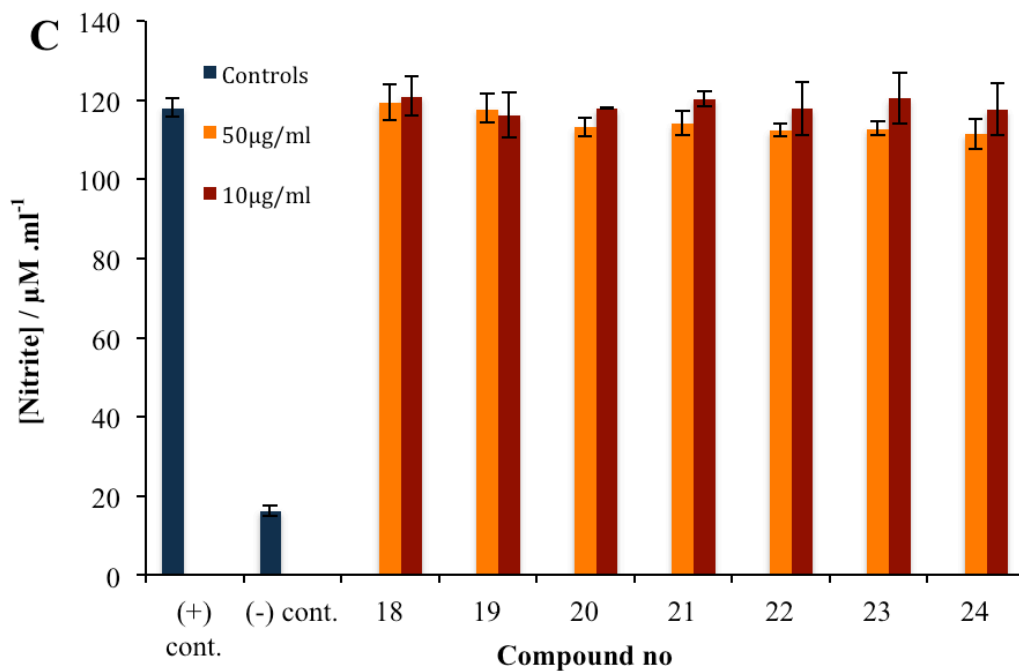

**Figure S24.** Nitric oxide immunoinhibition assay of compounds 18–24.

## Glycolipids 16, 34 and 35.

### 1. Pam3CSK4 as stimulant

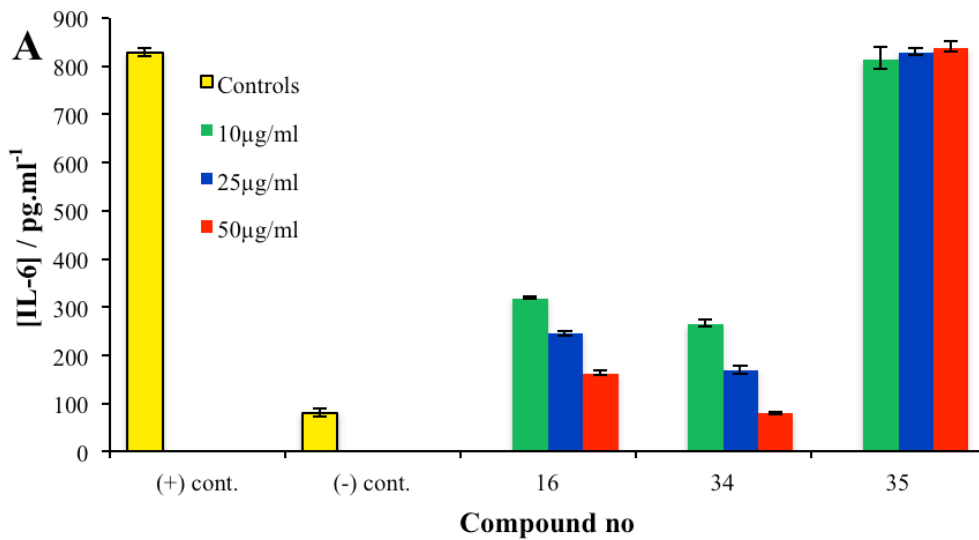

**Figure S25.** IL-6 immunoinhibition assay of compounds 16, 34 and 35.

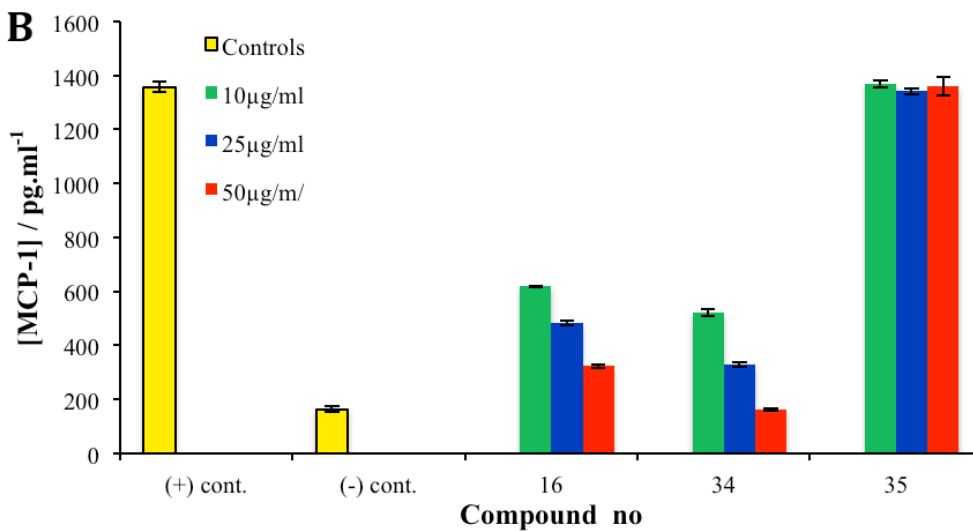

**Figure S26.** MCP-1 immunoinhibition assay of compounds 16, 34 and 35.

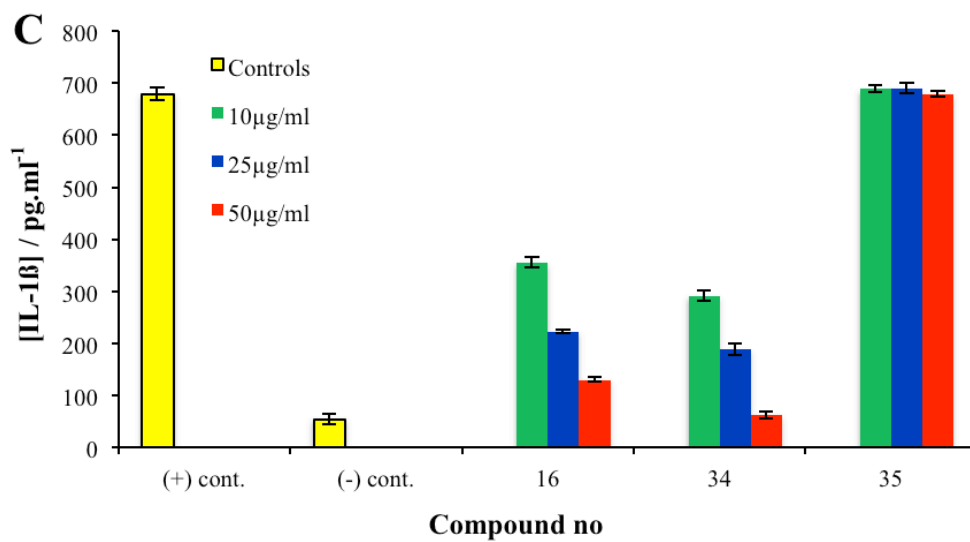

**Figure S27.** IL-1 $\beta$  immunoinhibition assay of compounds 16, 34 and 35.

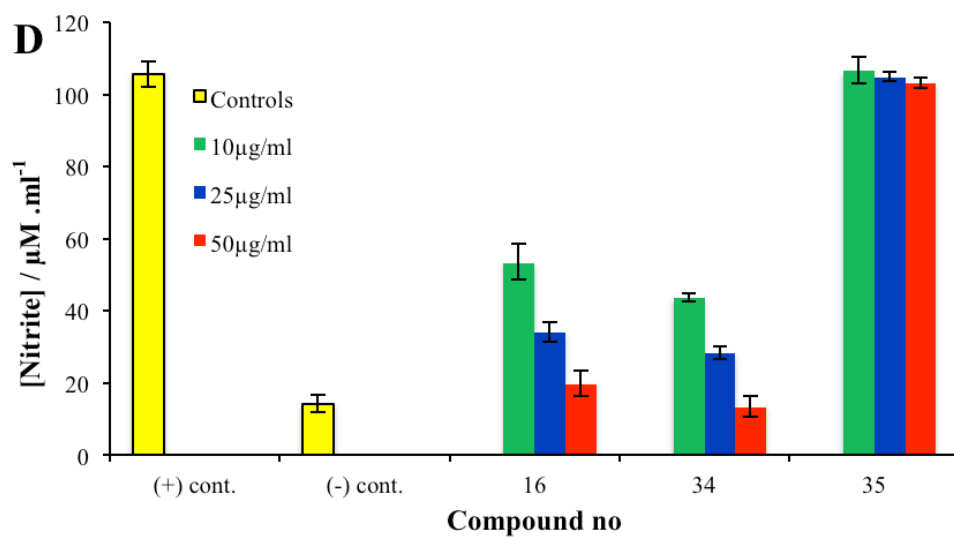

**Figure S28.** Nitric oxide immunoinhibition assay of compounds 16, 34 and 35.

## 2. Ultrapure LPS

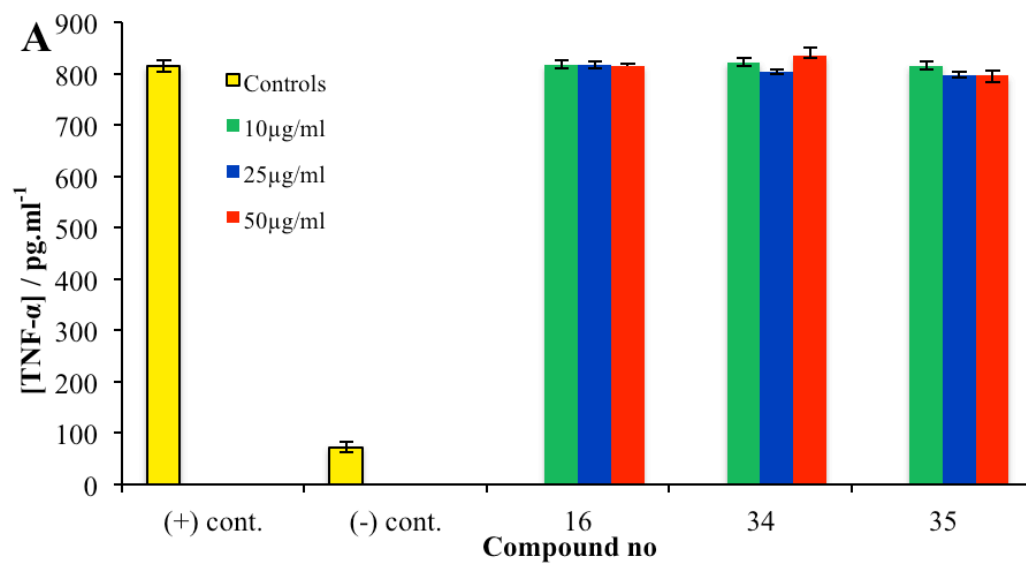

**Figure S29.** TNF- $\alpha$  immunoinhibition assay of compounds 16, 34 and 35.

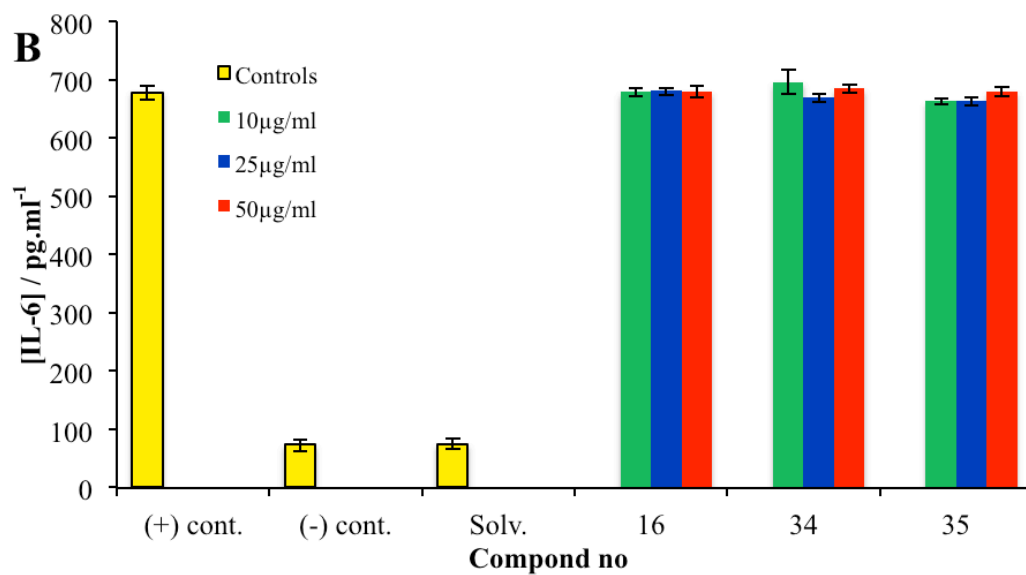

**Figure S30.** IL-6 immunoinhibition assay of compounds 16, 34 and 35.

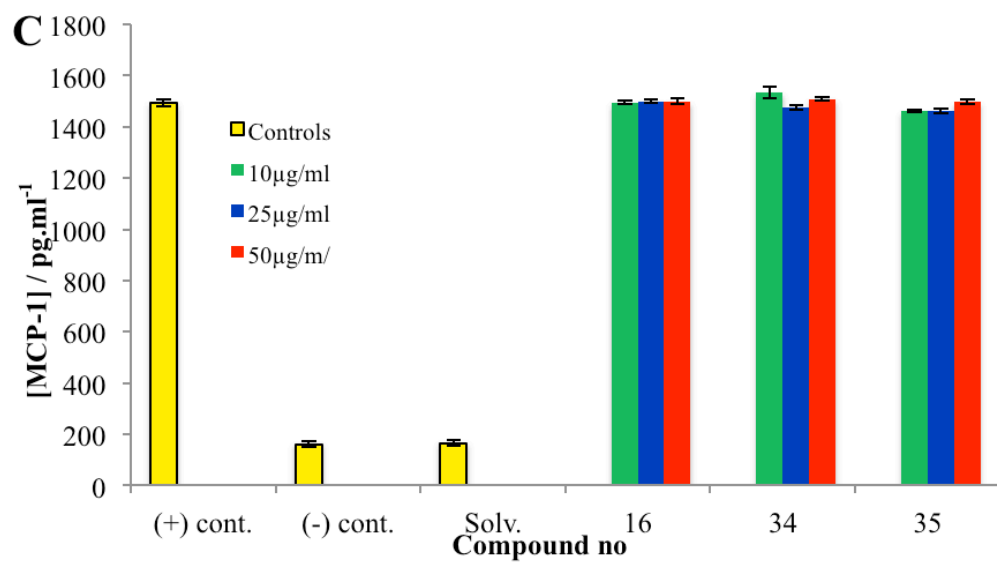

**Figure S31.** MCP-1 immunoinhibition assay of compounds **16**, **34** and **35**.

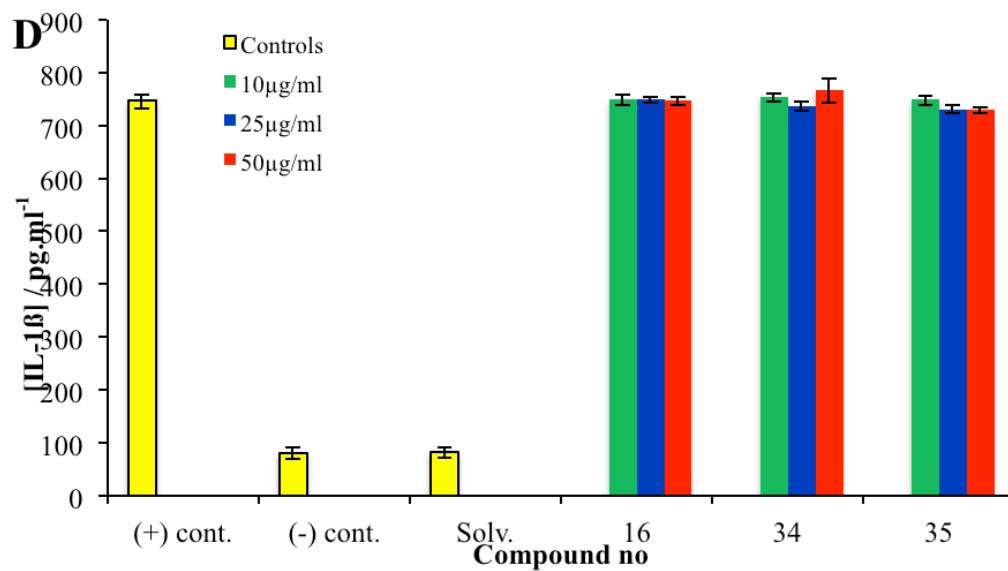

**Figure S32.** IL-1 $\beta$  immunoinhibition assay of compounds **16**, **34** and **35**.



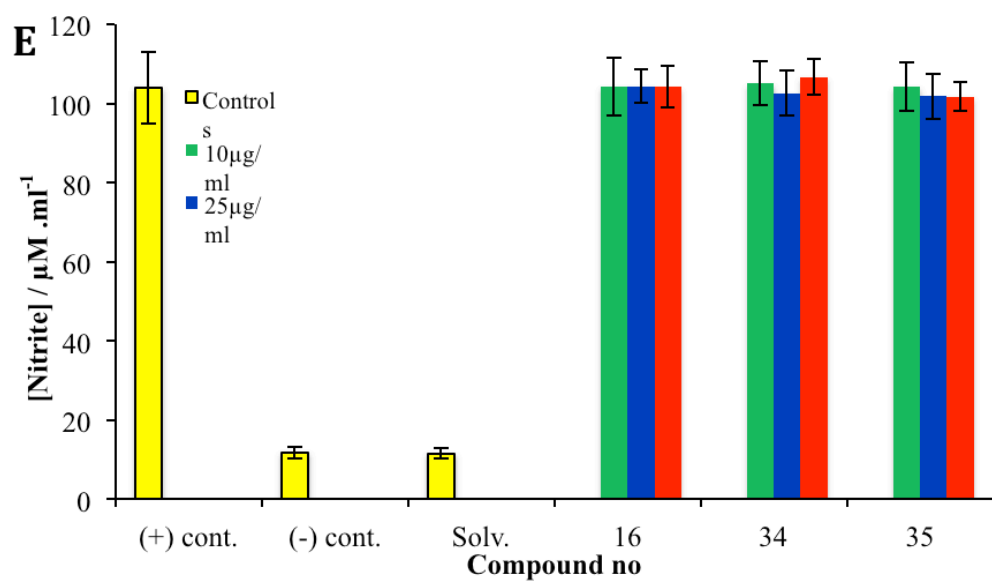

**Figure S33.** Nitric oxide immunoinhibition assay of compounds **16**, **34** and **35**.

<sup>1</sup>H NMR of compound **8**

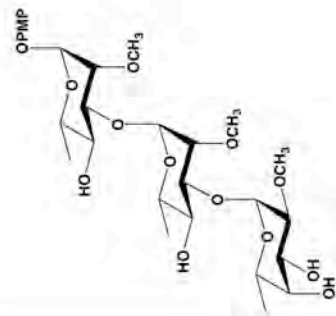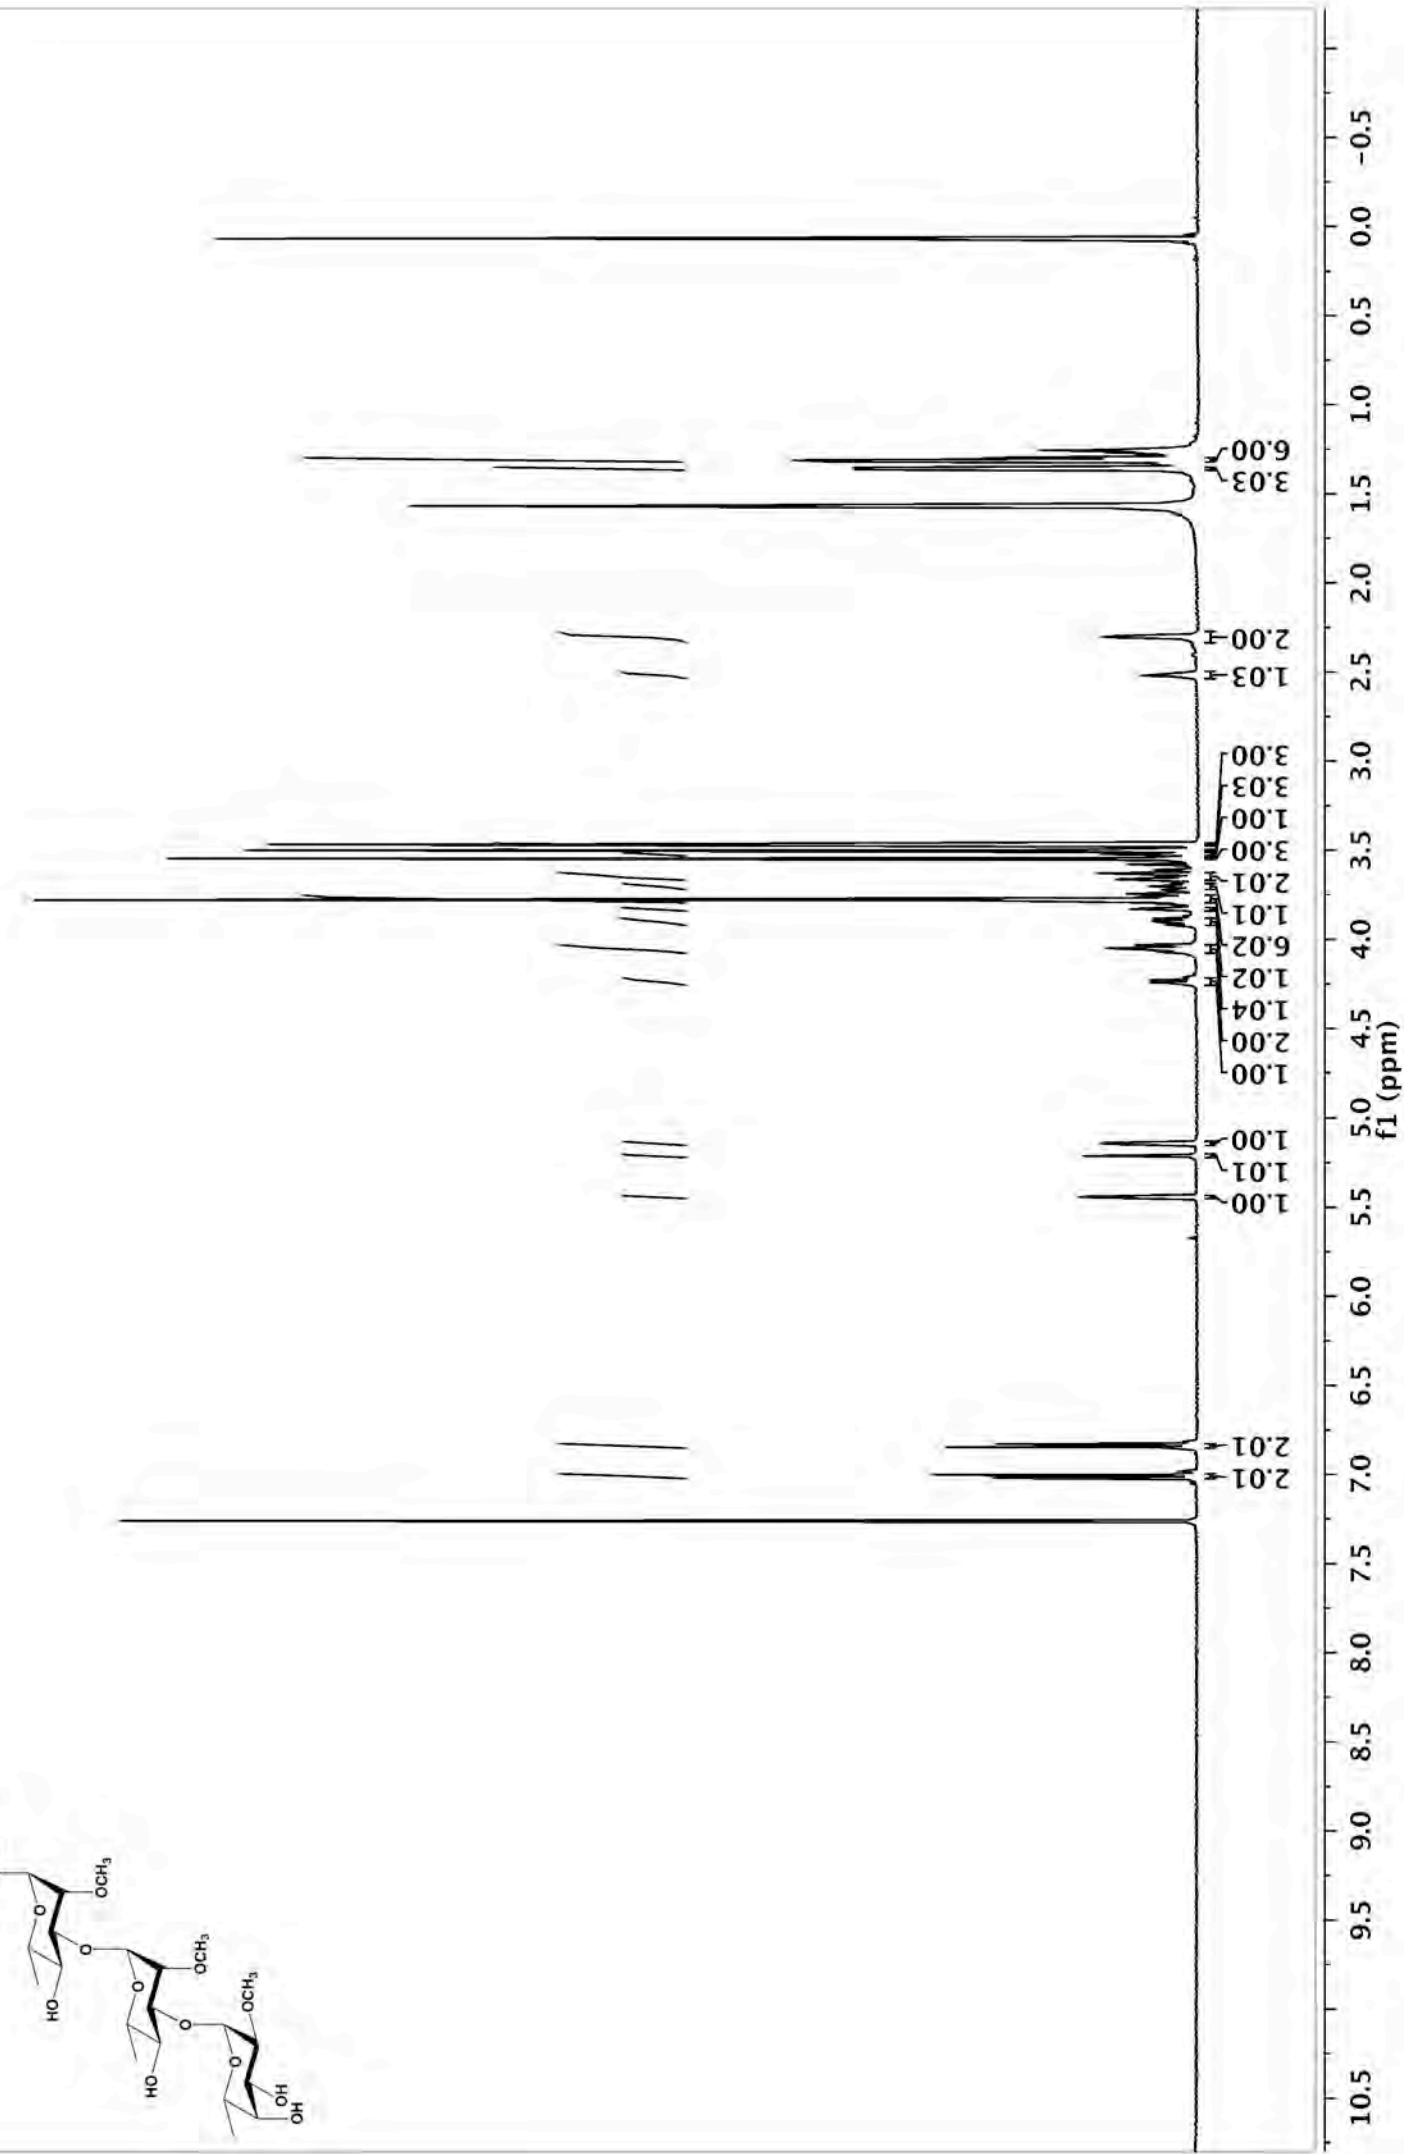

<sup>13</sup>C NMR of compound **8**

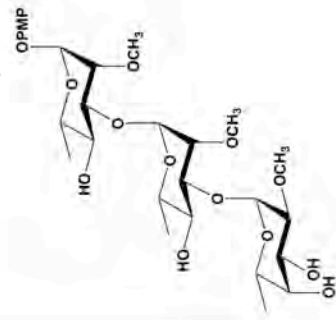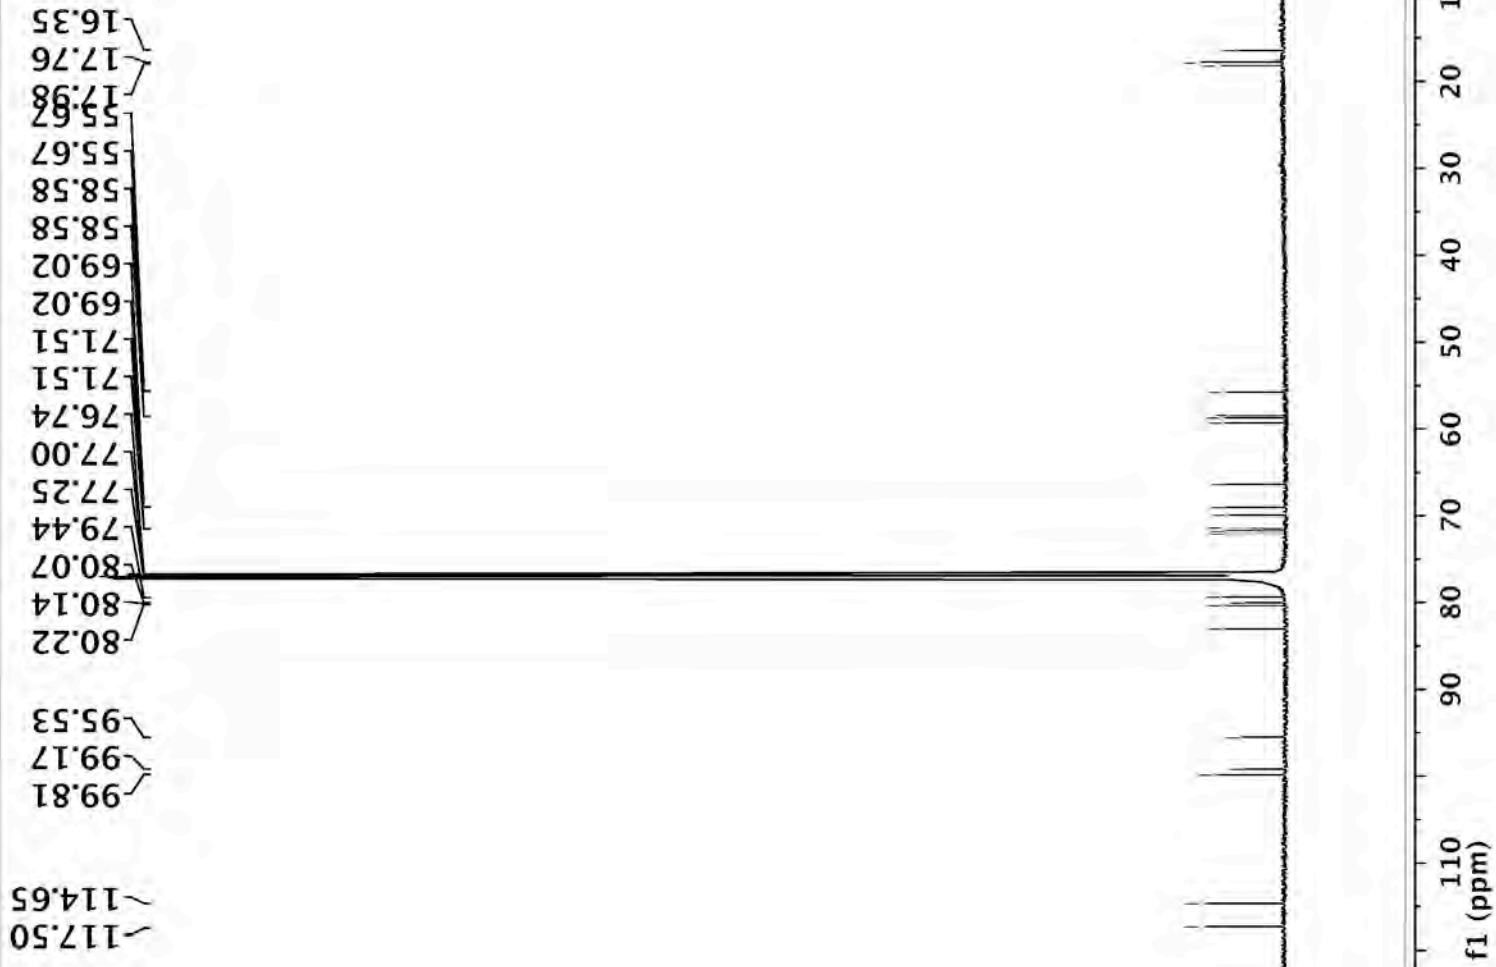

<sup>1</sup>H NMR of compound 9

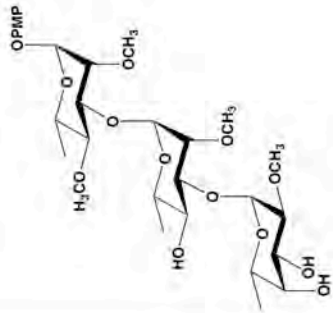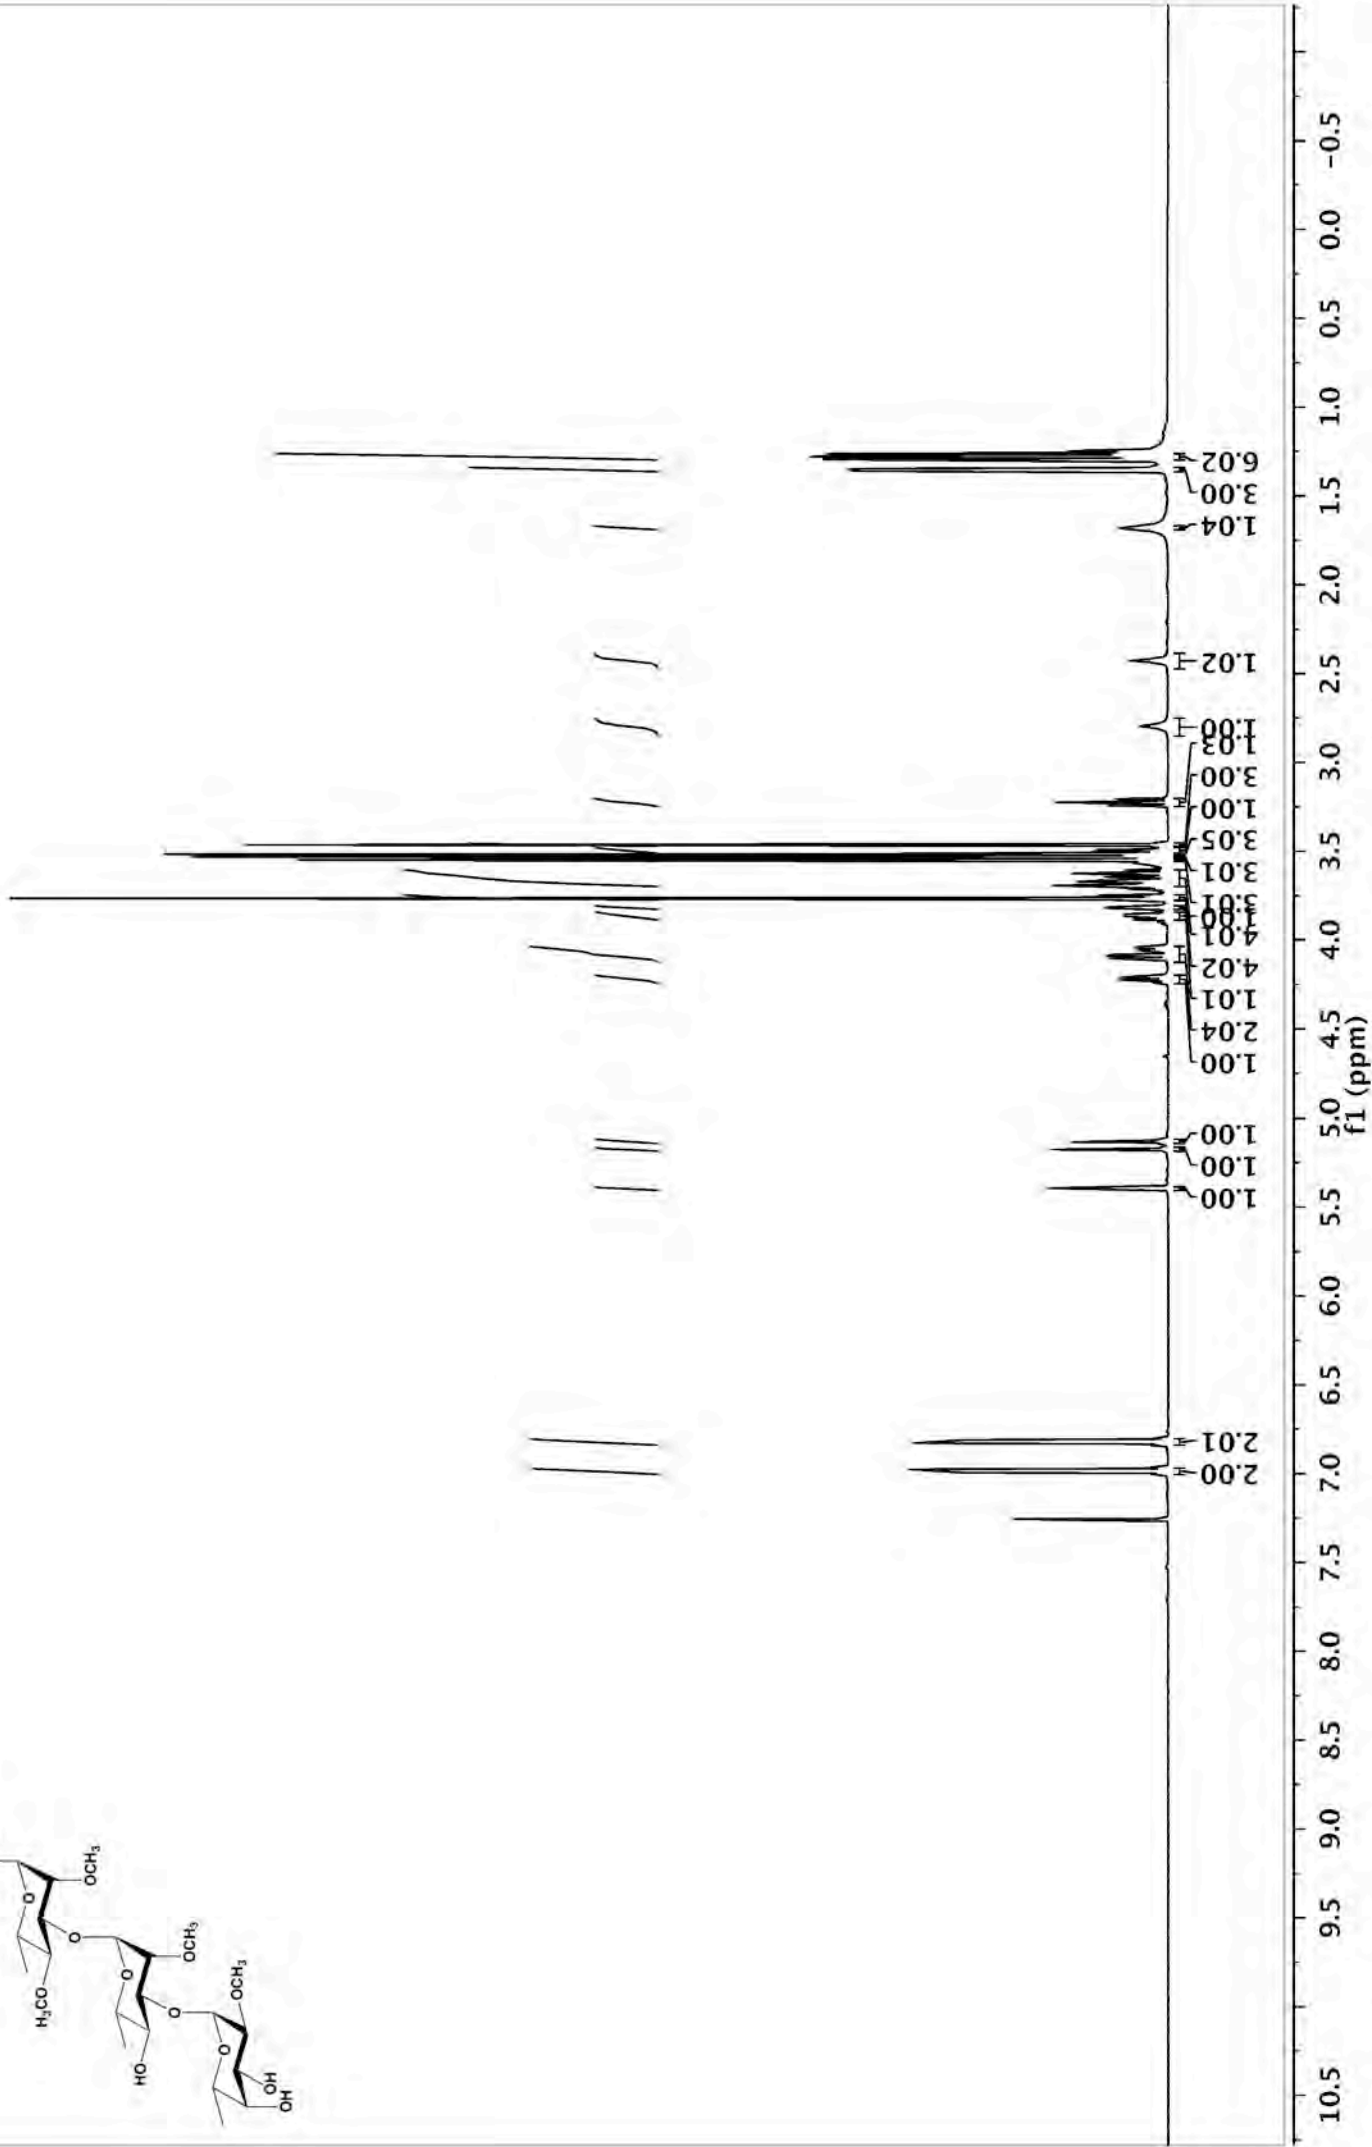

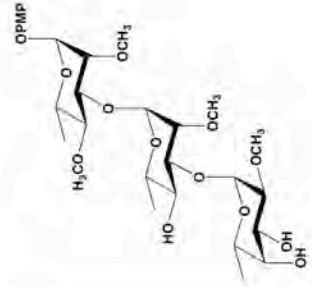

<sup>13</sup>C NMR of compound 9

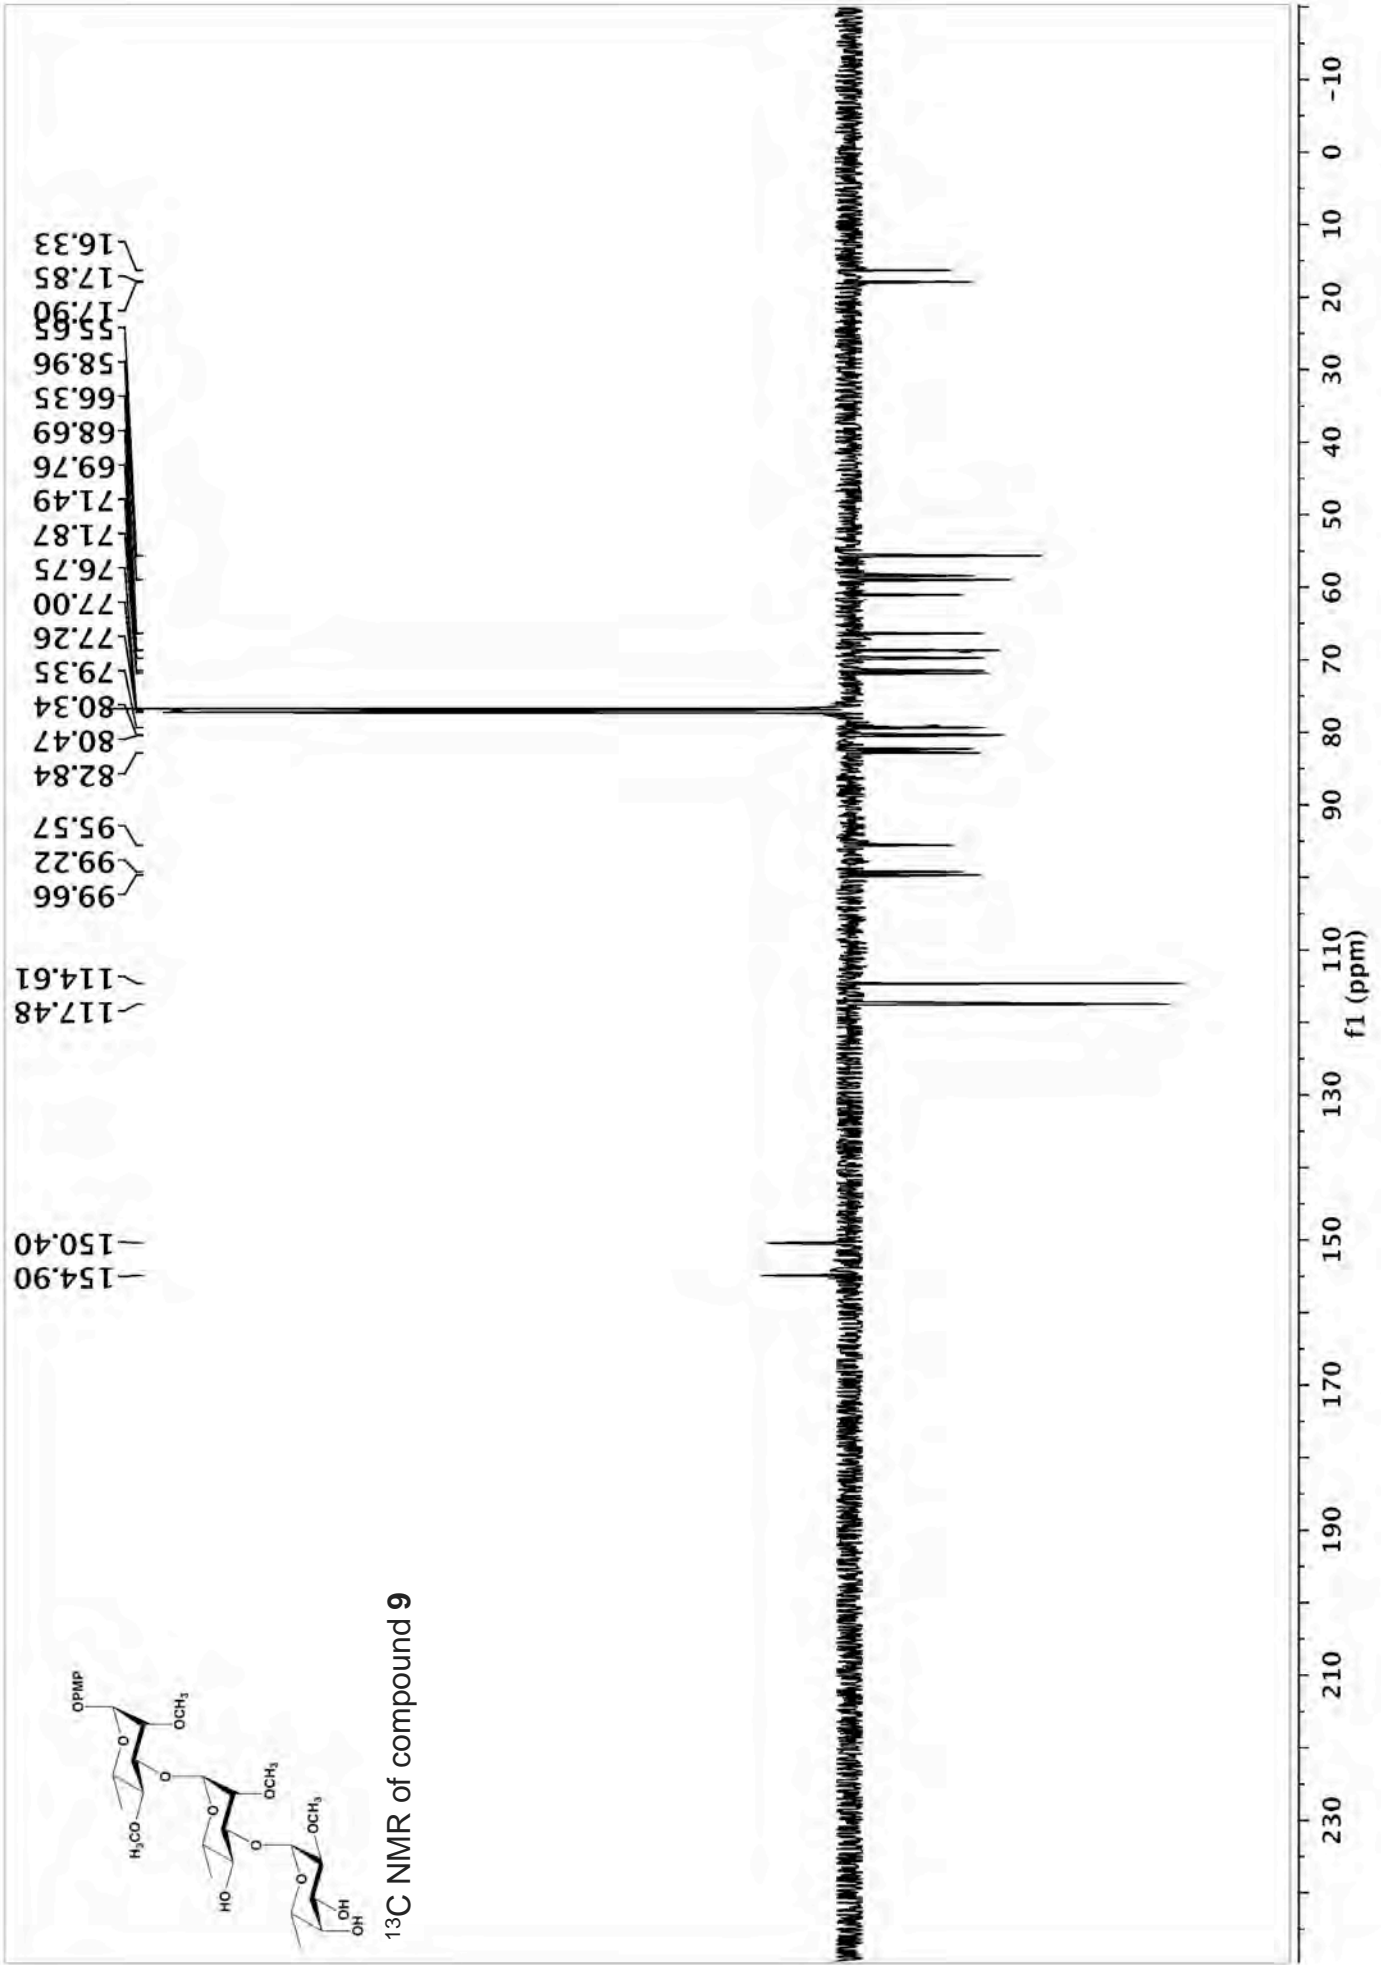

<sup>1</sup>H NMR of compound 10

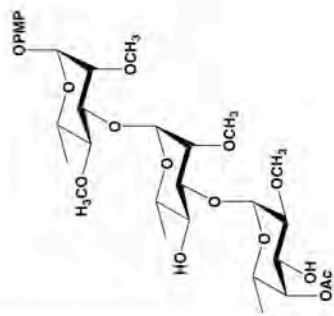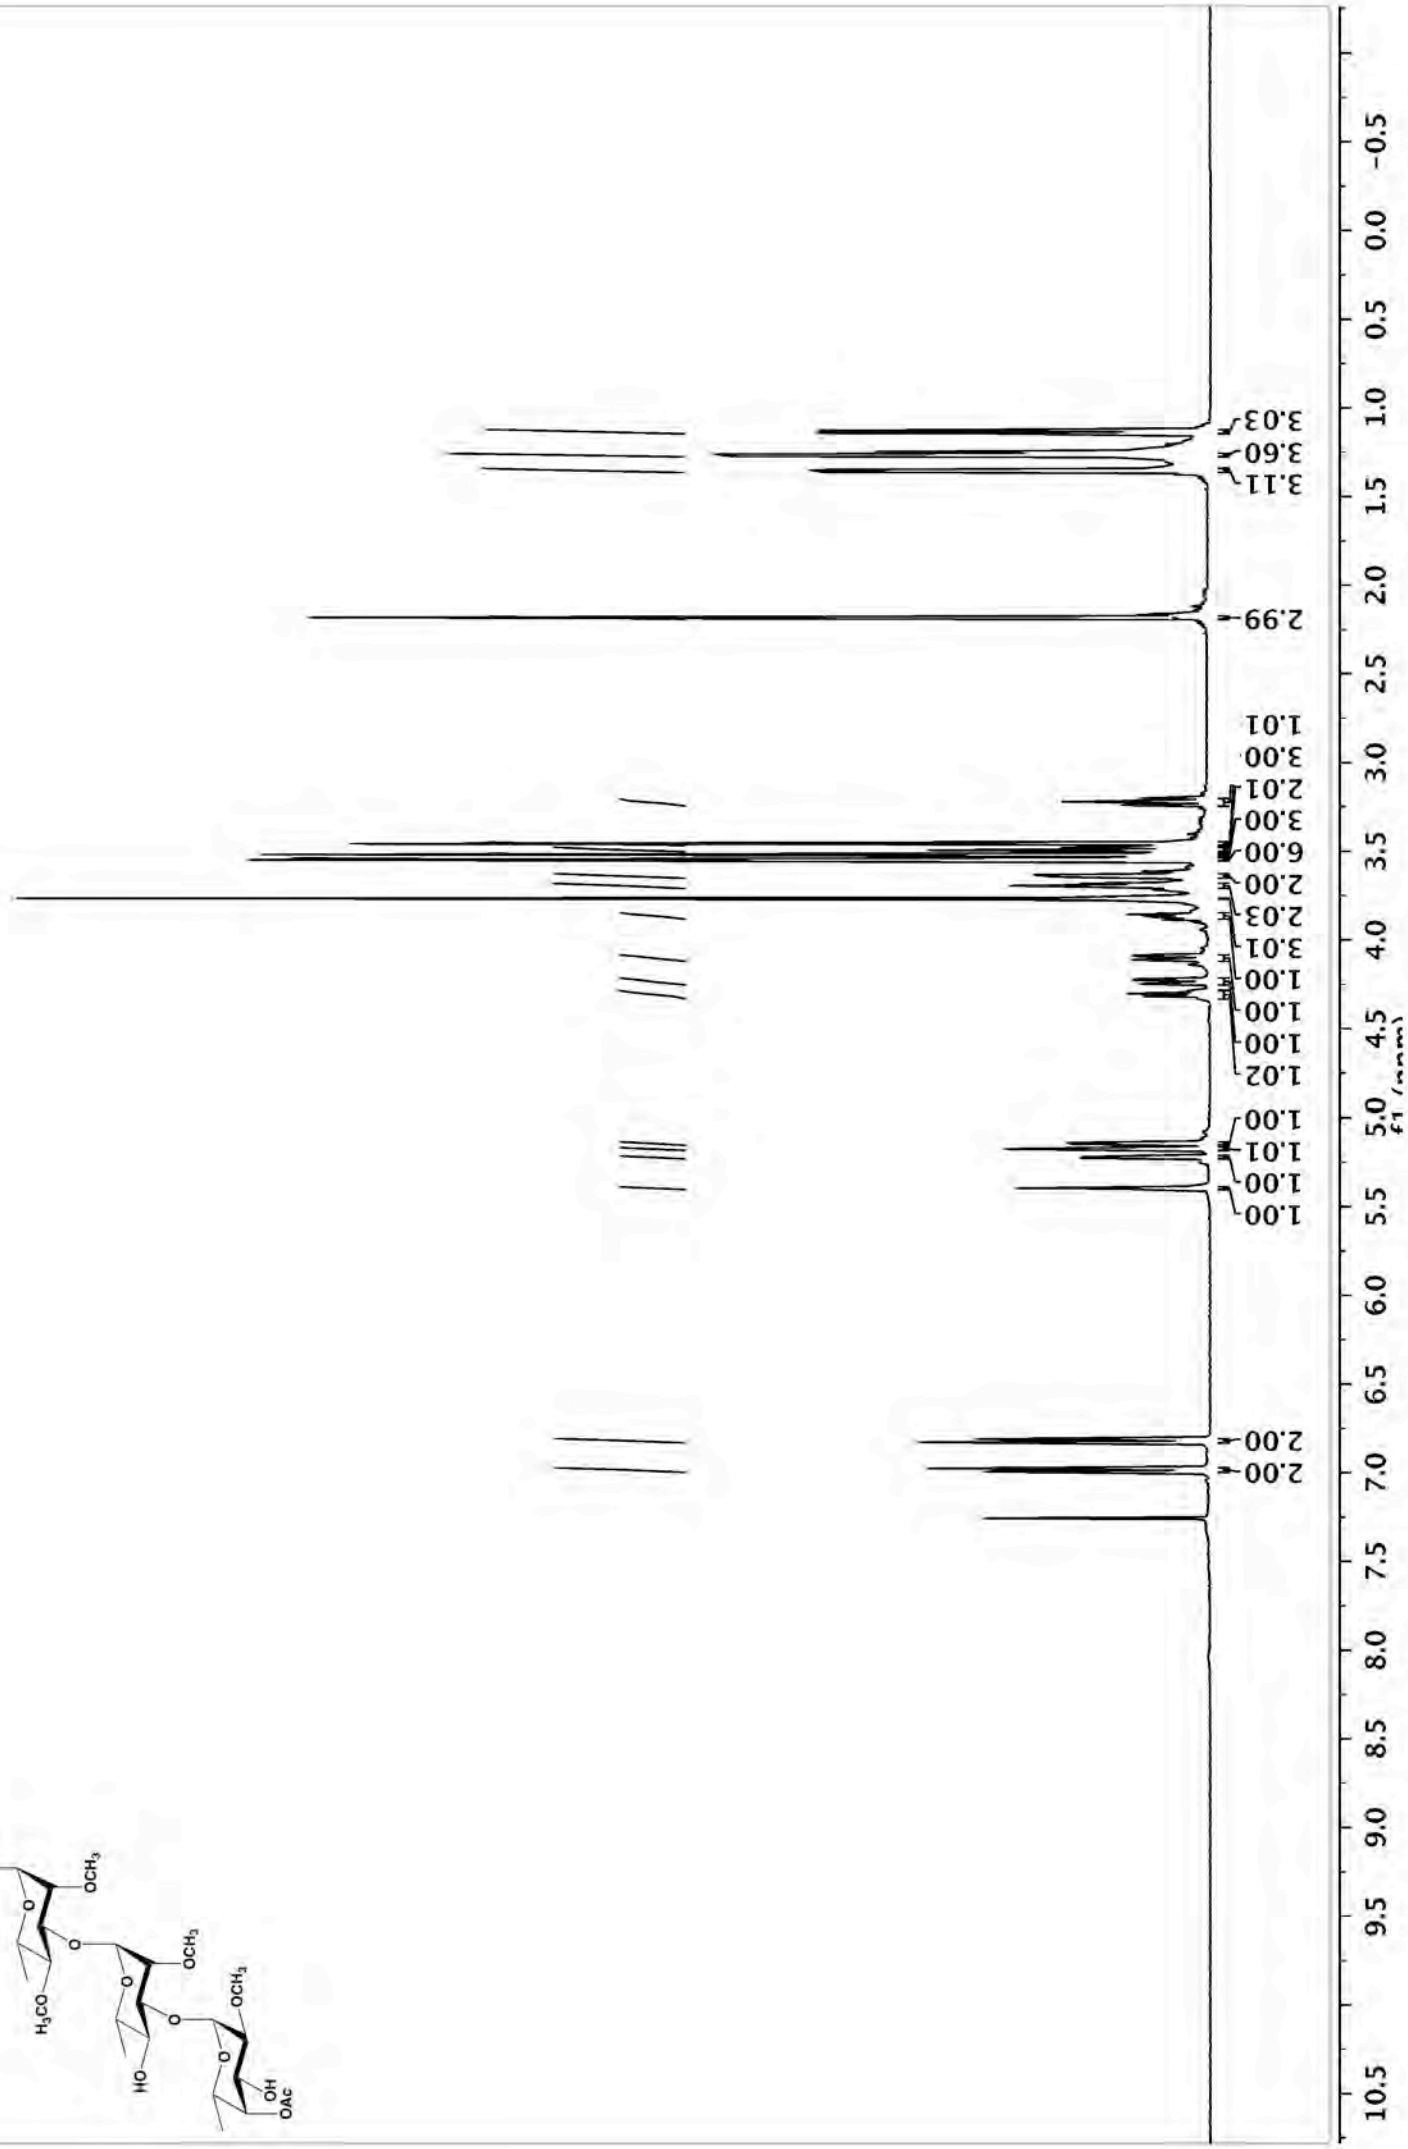

<sup>13</sup>C NMR of compound 10

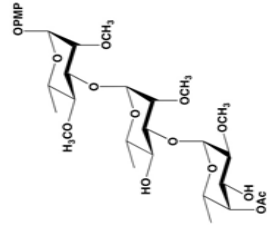

171.32  
154.91  
150.40  
117.48  
114.61  
100.00  
99.19  
95.55  
83.03  
82.28  
80.50  
80.33  
79.37  
77.26  
77.00  
76.75  
73.40  
71.51  
68.67  
55.65  
50.83  
17.89  
17.85  
16.34

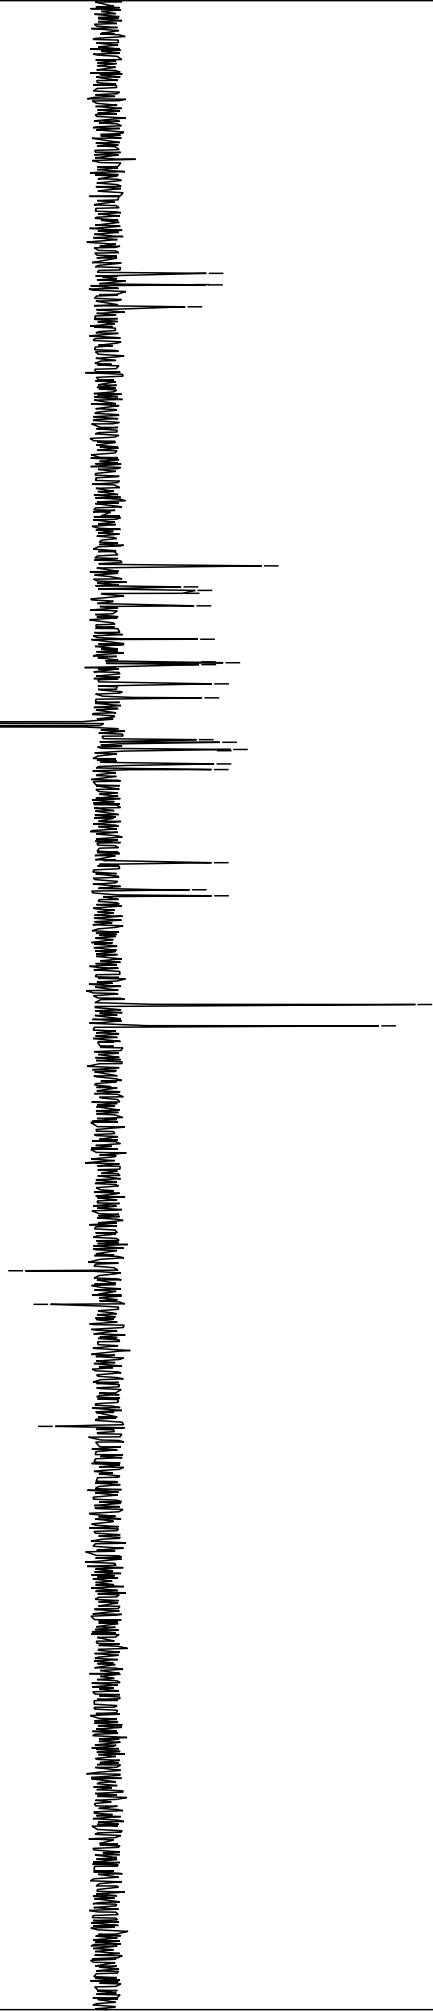

240 230 220 210 200 190 180 170 160 150 140 130 120 110 100 90 80 70 60 50 40 30 20 10 0 -10 -20

<sup>1</sup>H NMR of compound 11

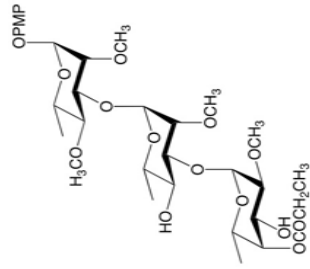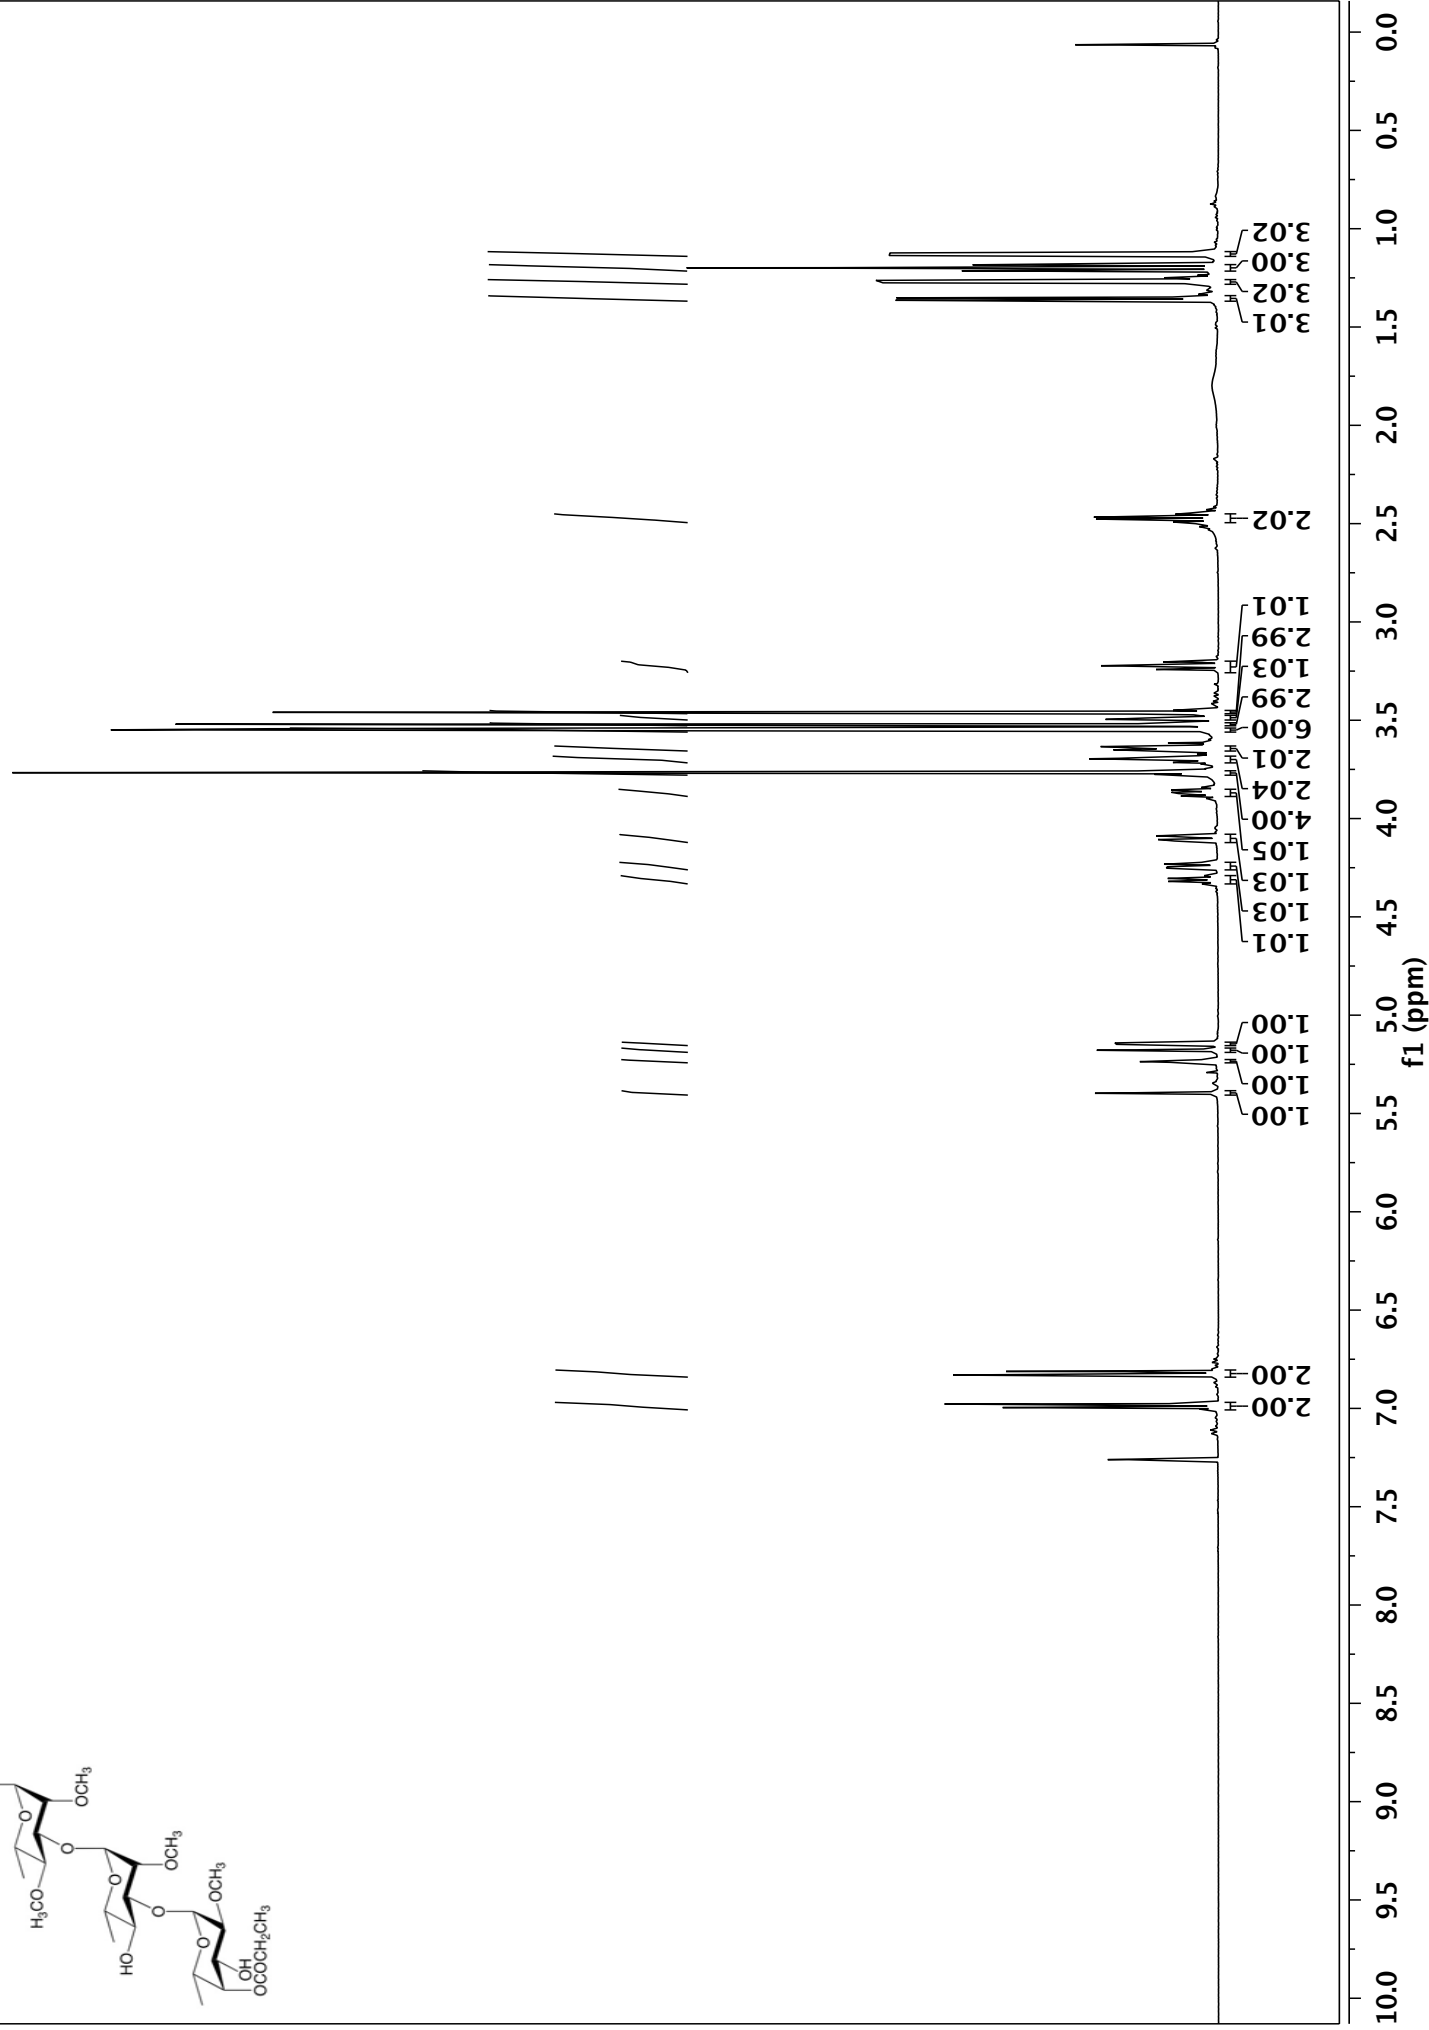



<sup>13</sup>C NMR of compound 11

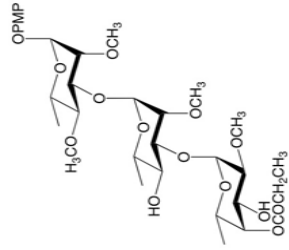

174.83  
154.91  
150.40  
117.48  
114.61  
100.03  
99.16  
95.58  
82.29  
80.51  
80.33  
79.40  
73.22  
71.48  
68.94  
65.57  
59.34  
58.97  
58.46  
55.65  
27.54  
17.89  
17.84  
16.33  
9.30

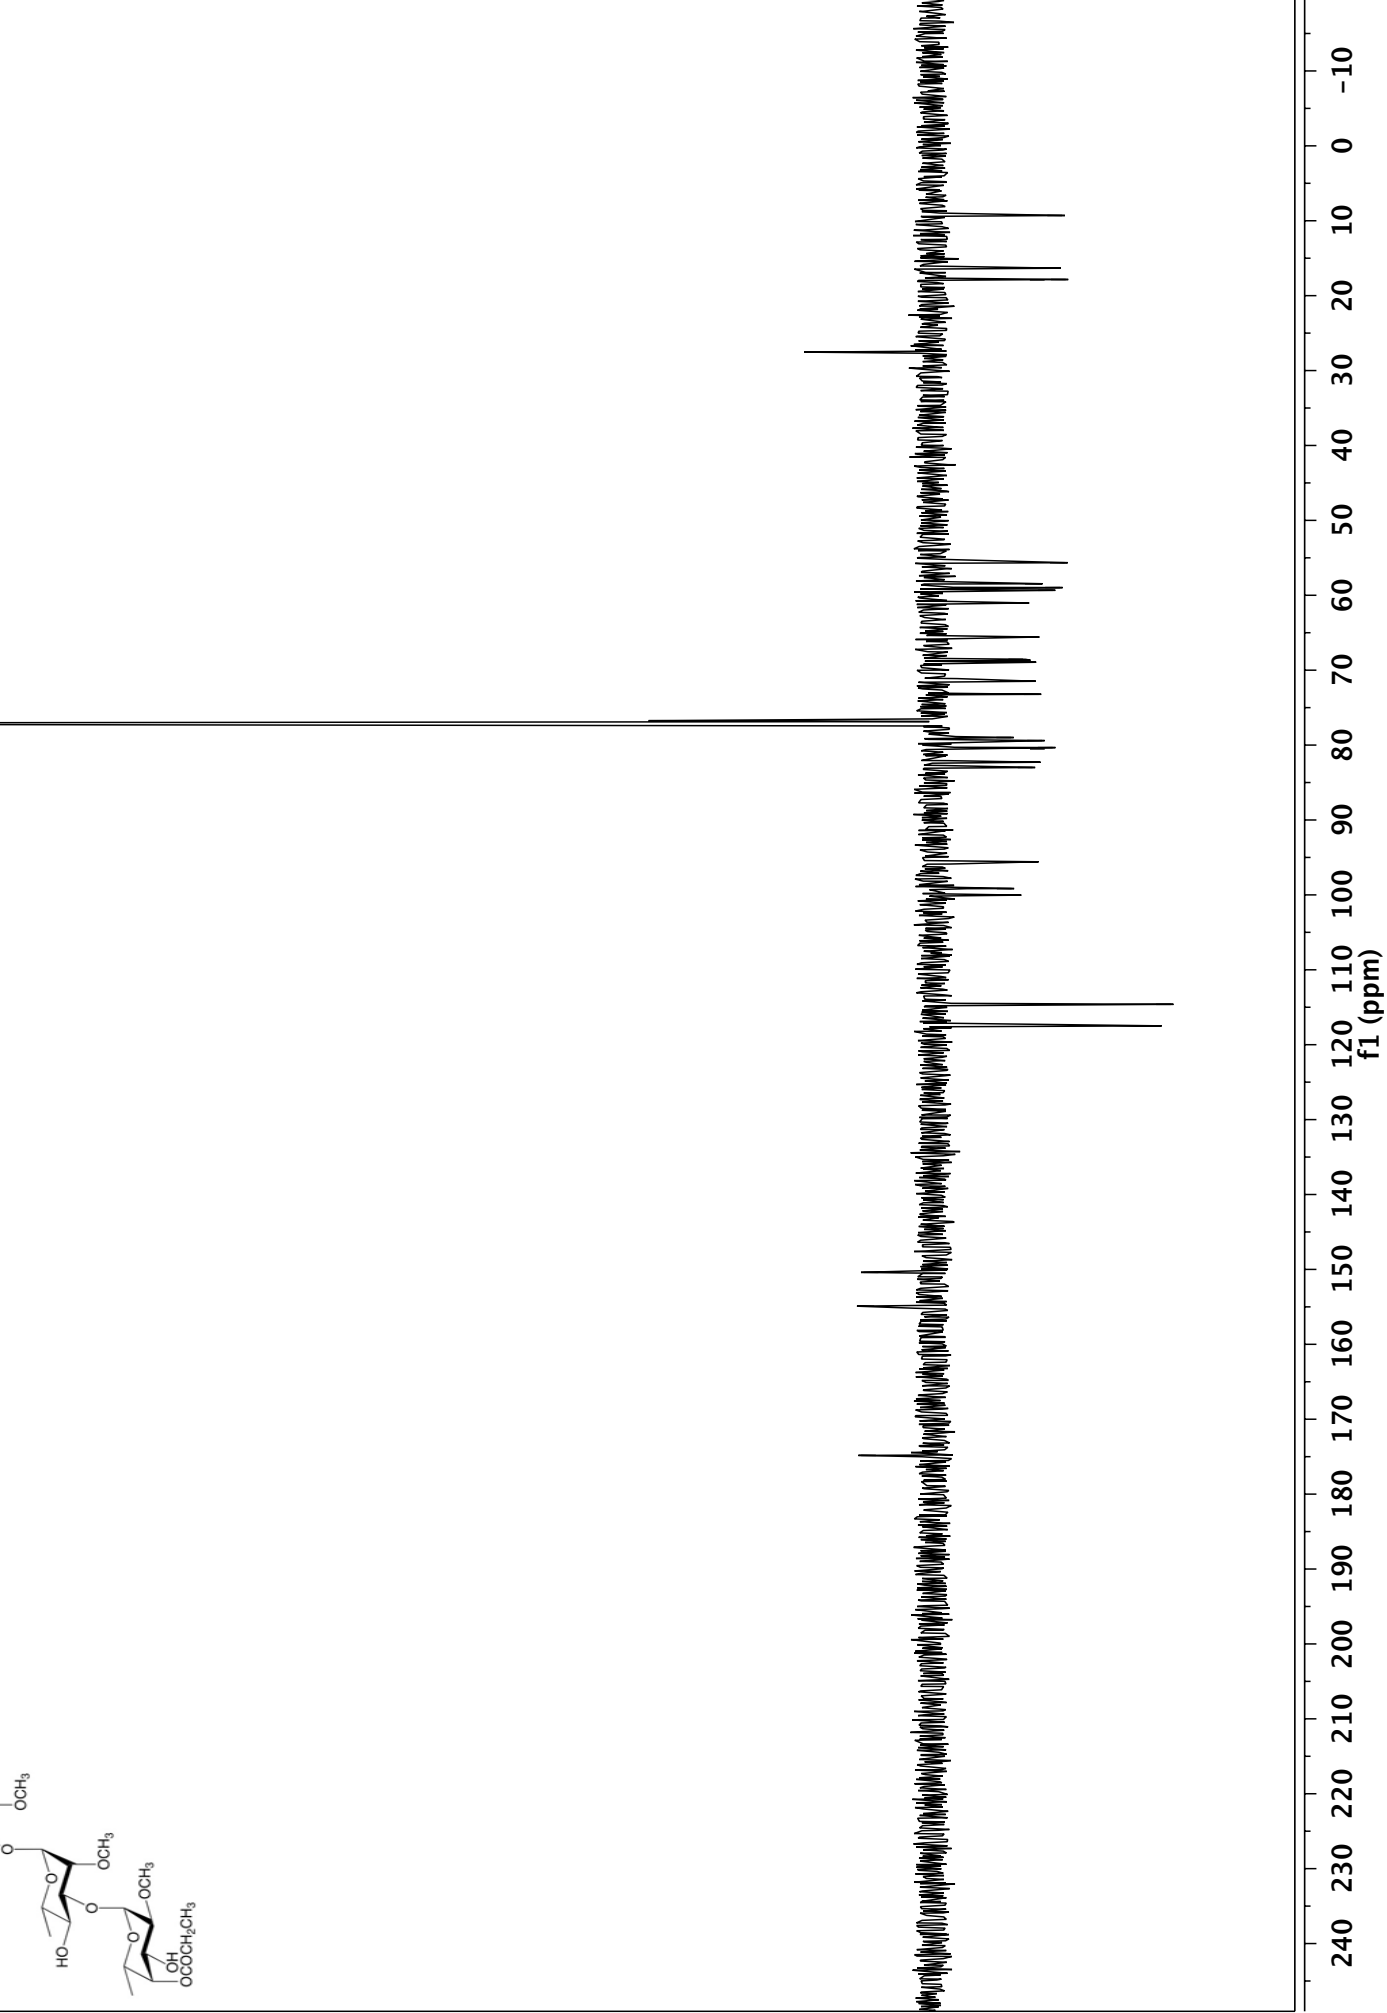

<sup>1</sup>H NMR of compound 12

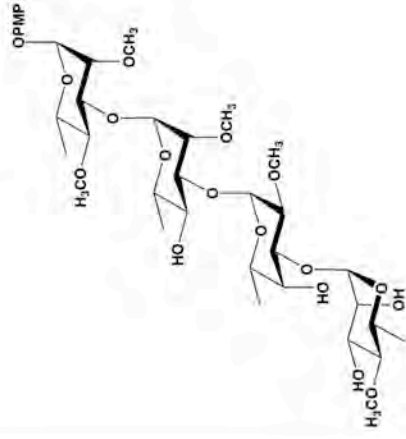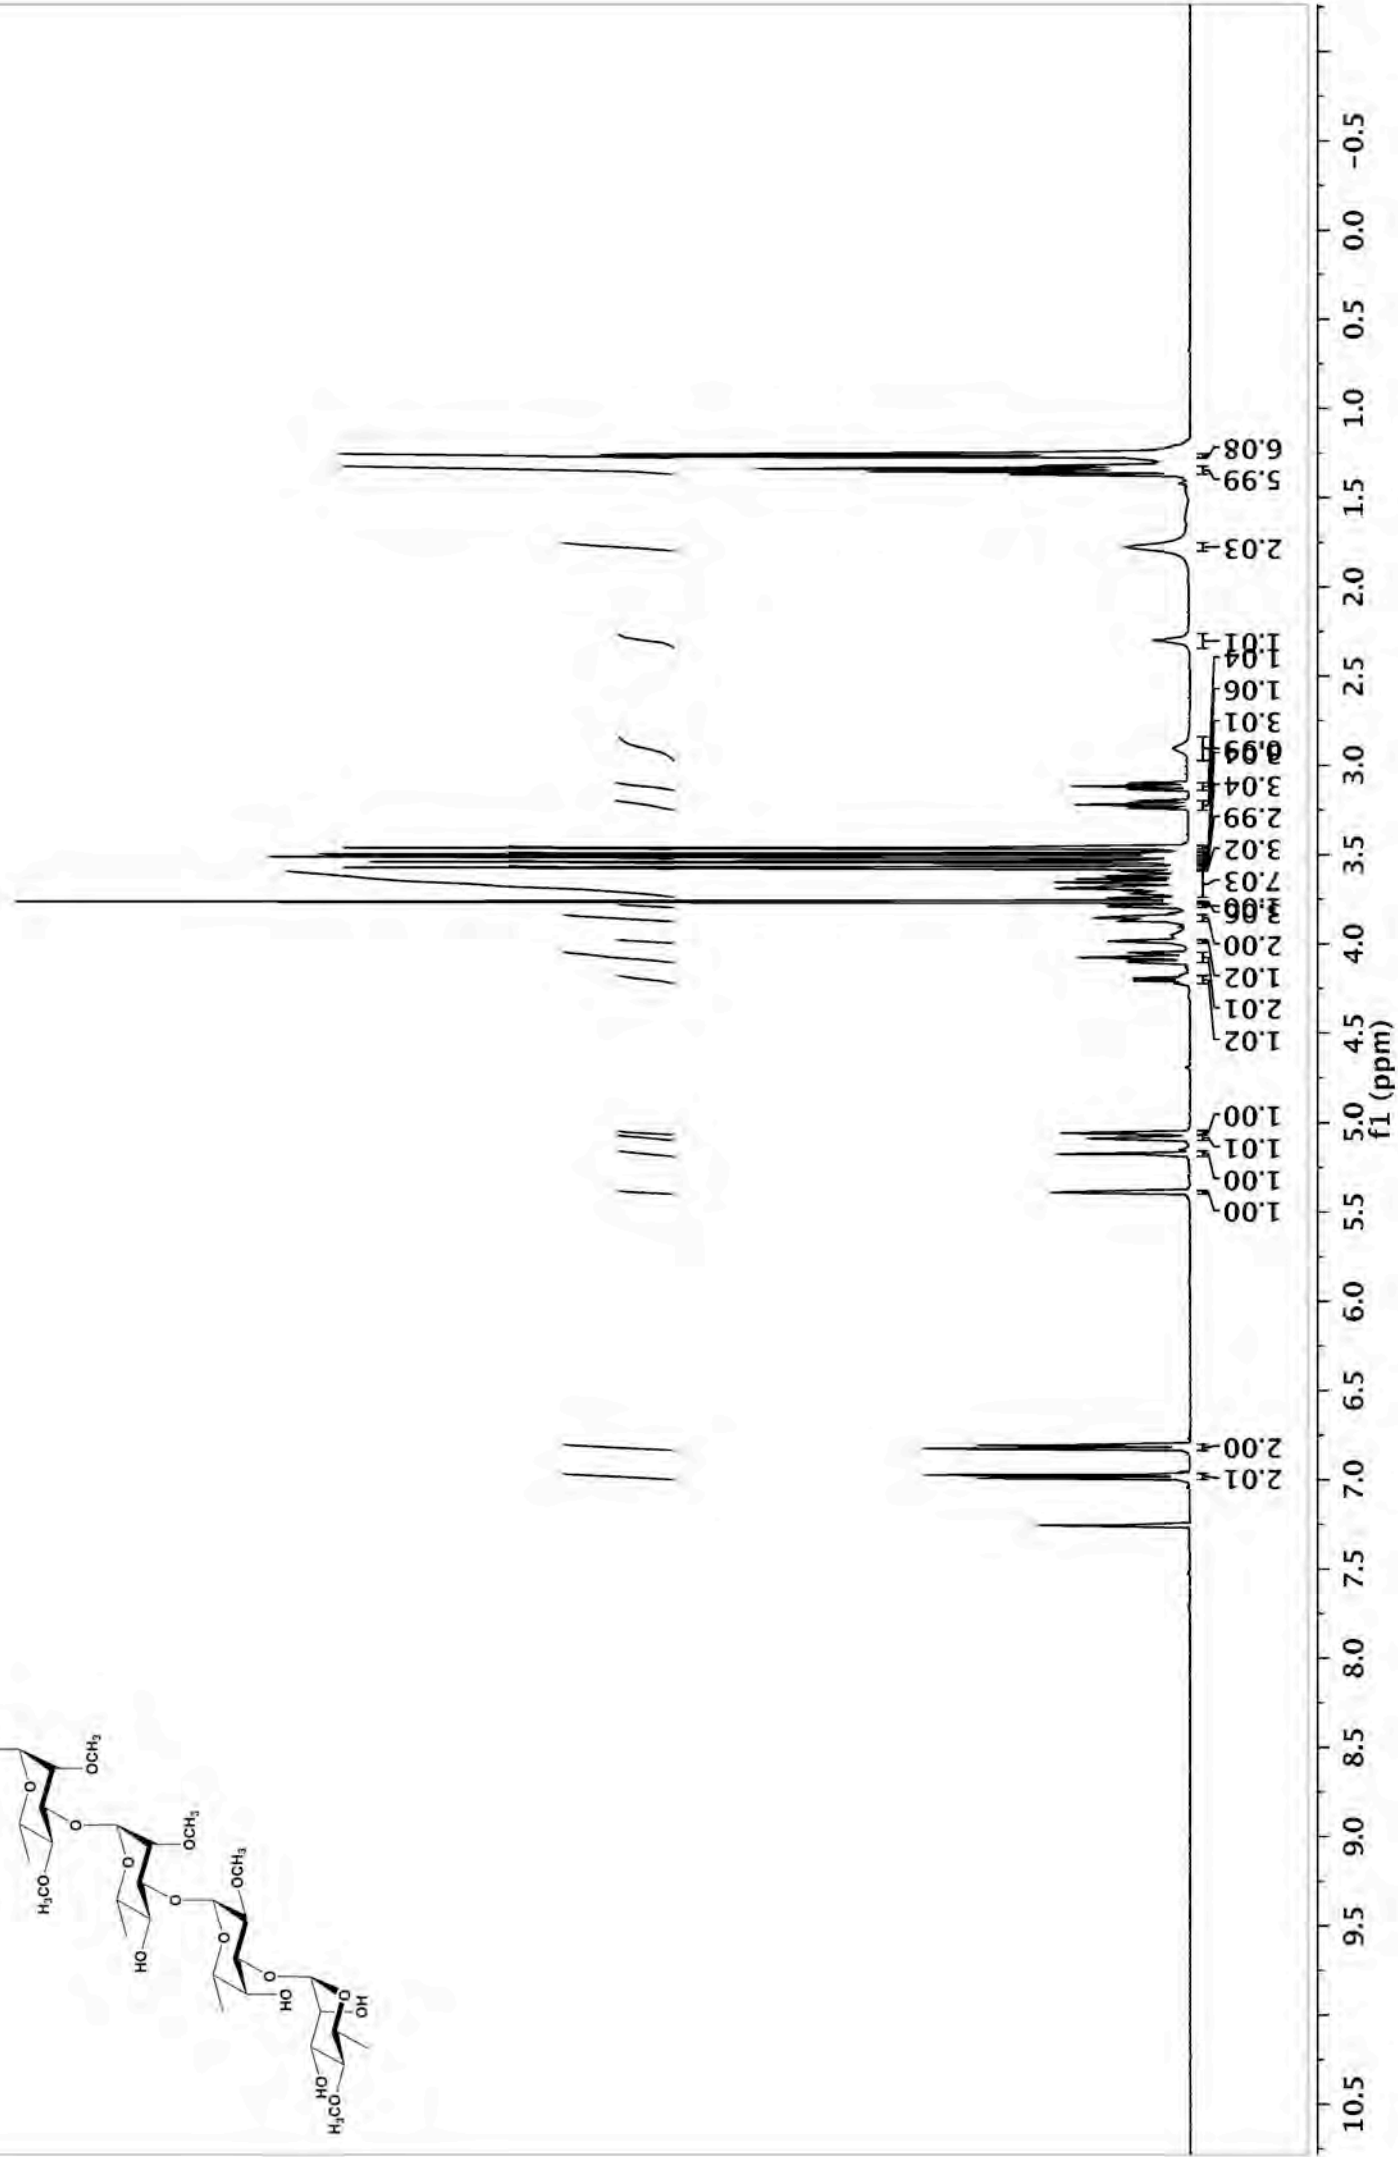

<sup>13</sup>C NMR of compound 12

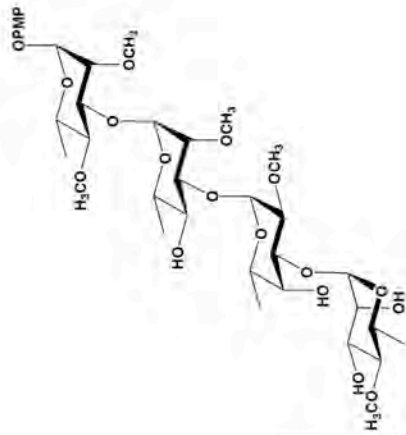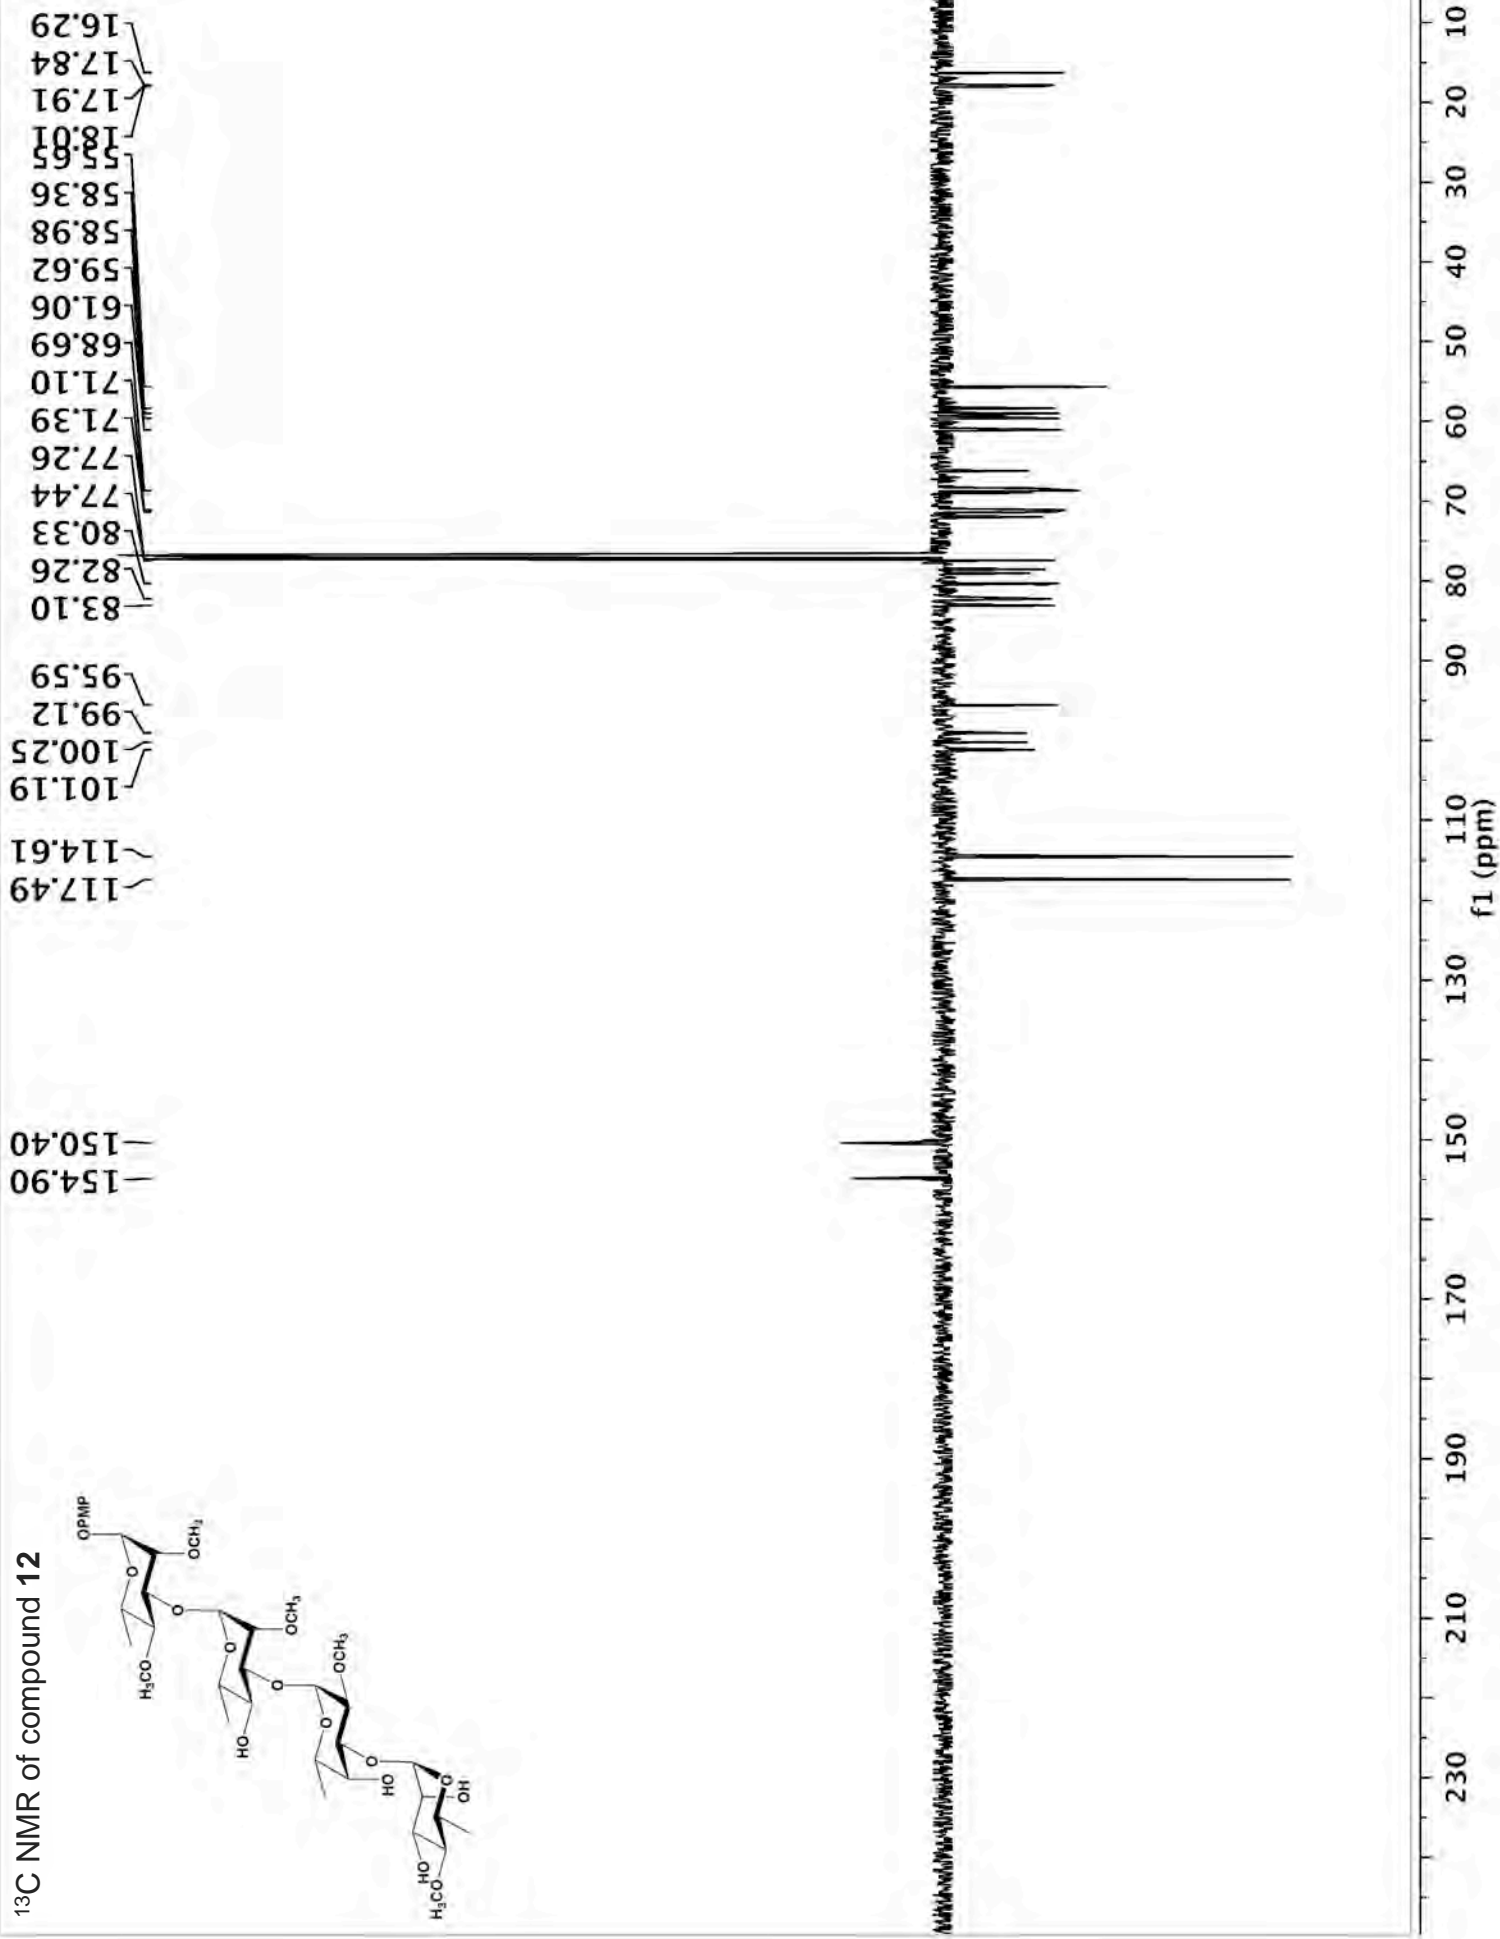

<sup>1</sup>H NMR of compound 13

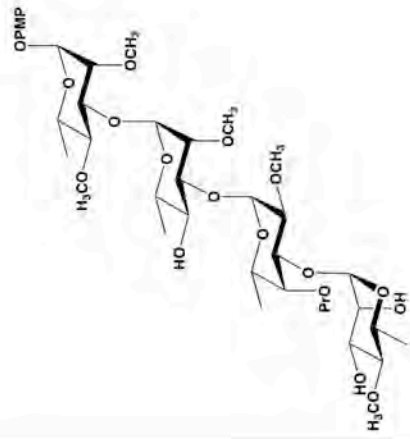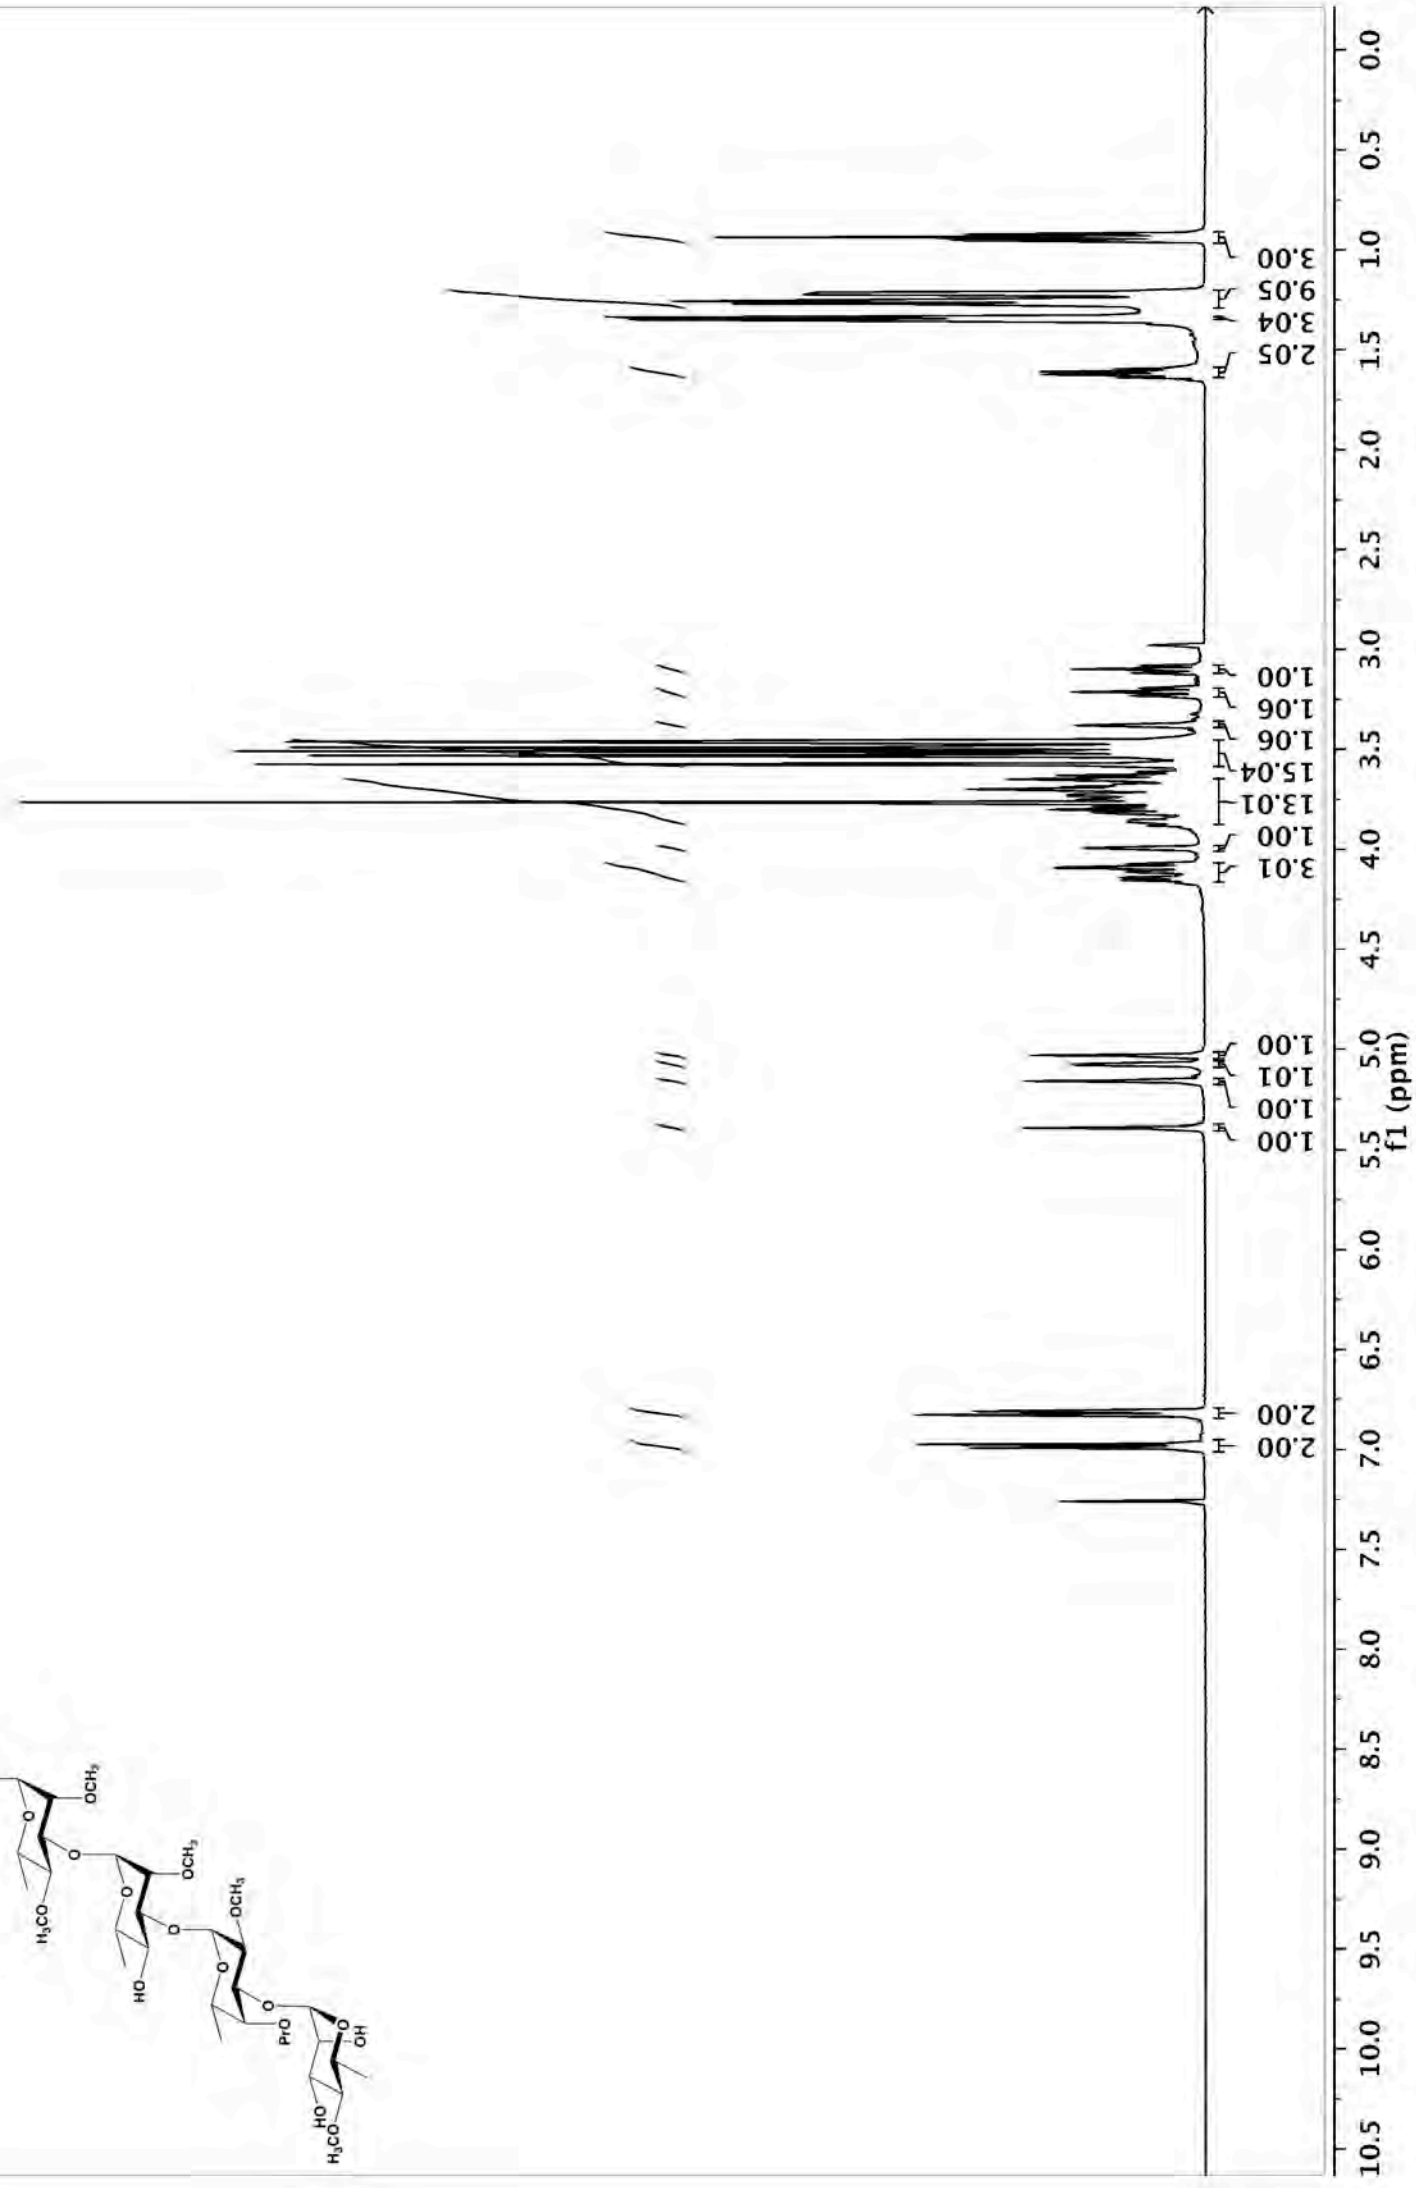

<sup>13</sup>C NMR of compound 13

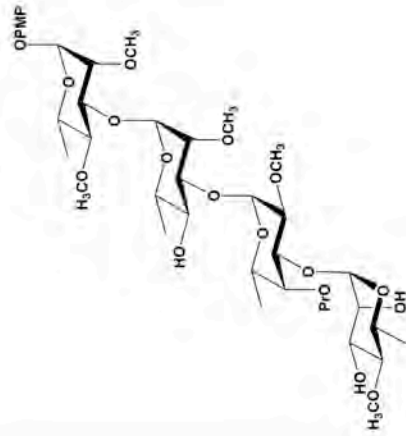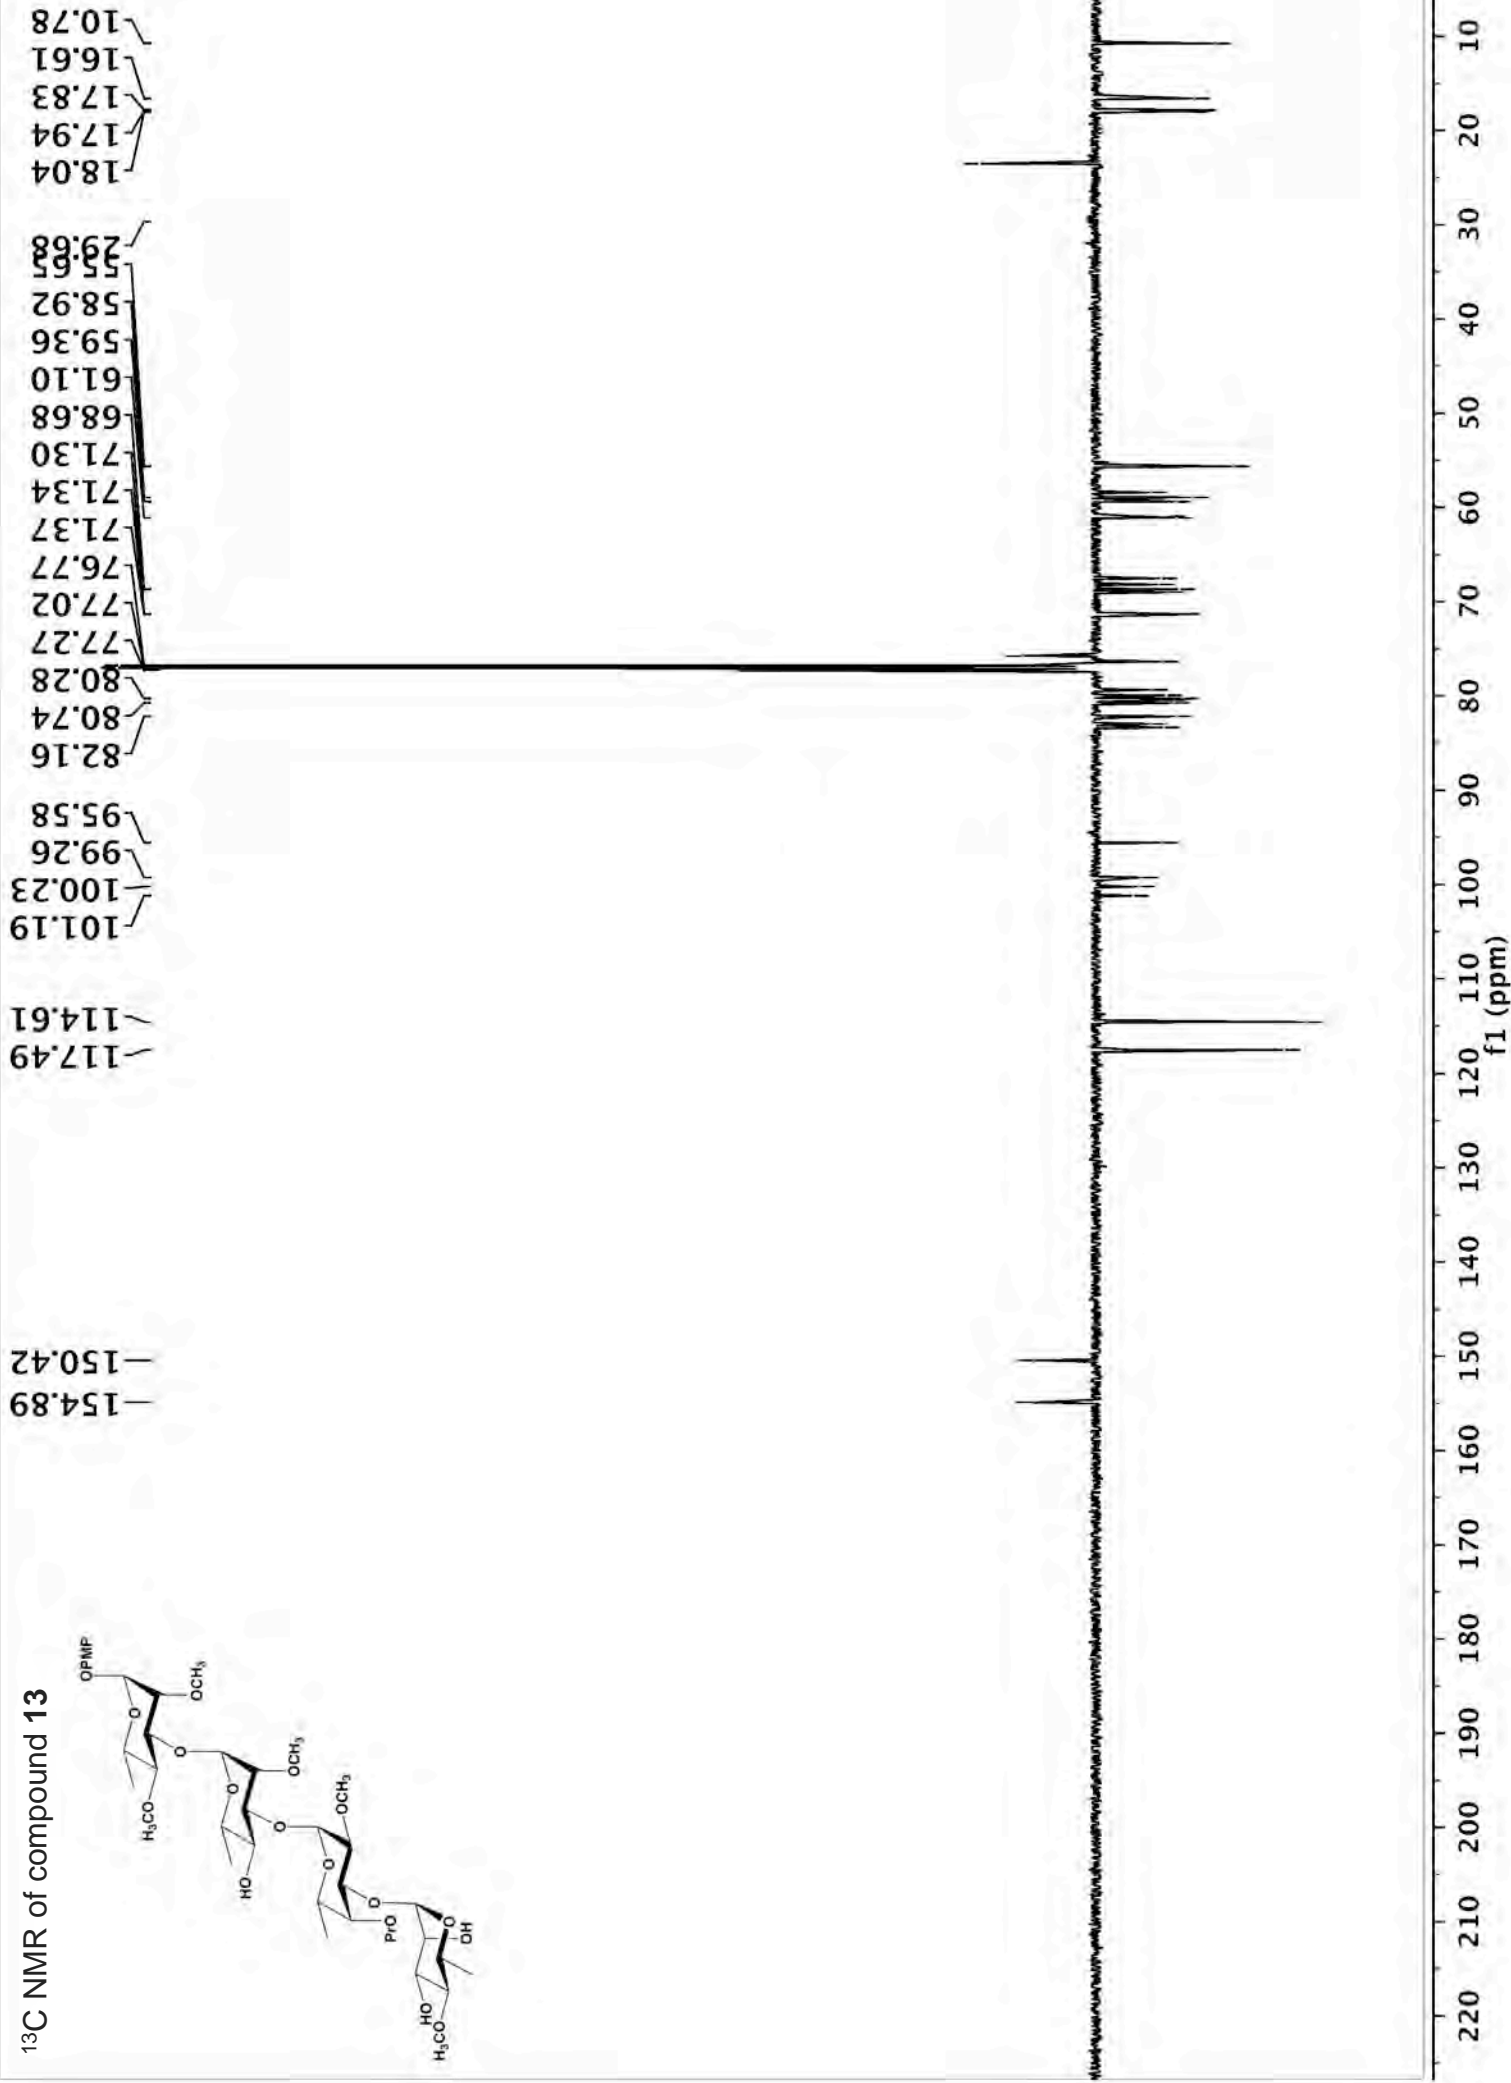

<sup>1</sup>H NMR of compound 14

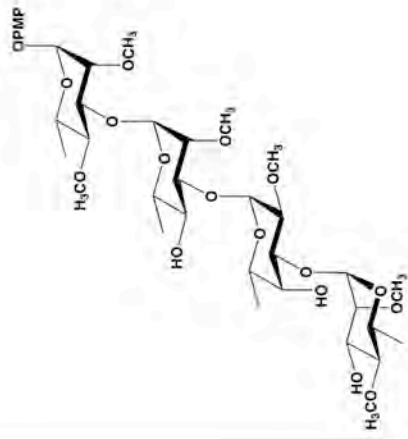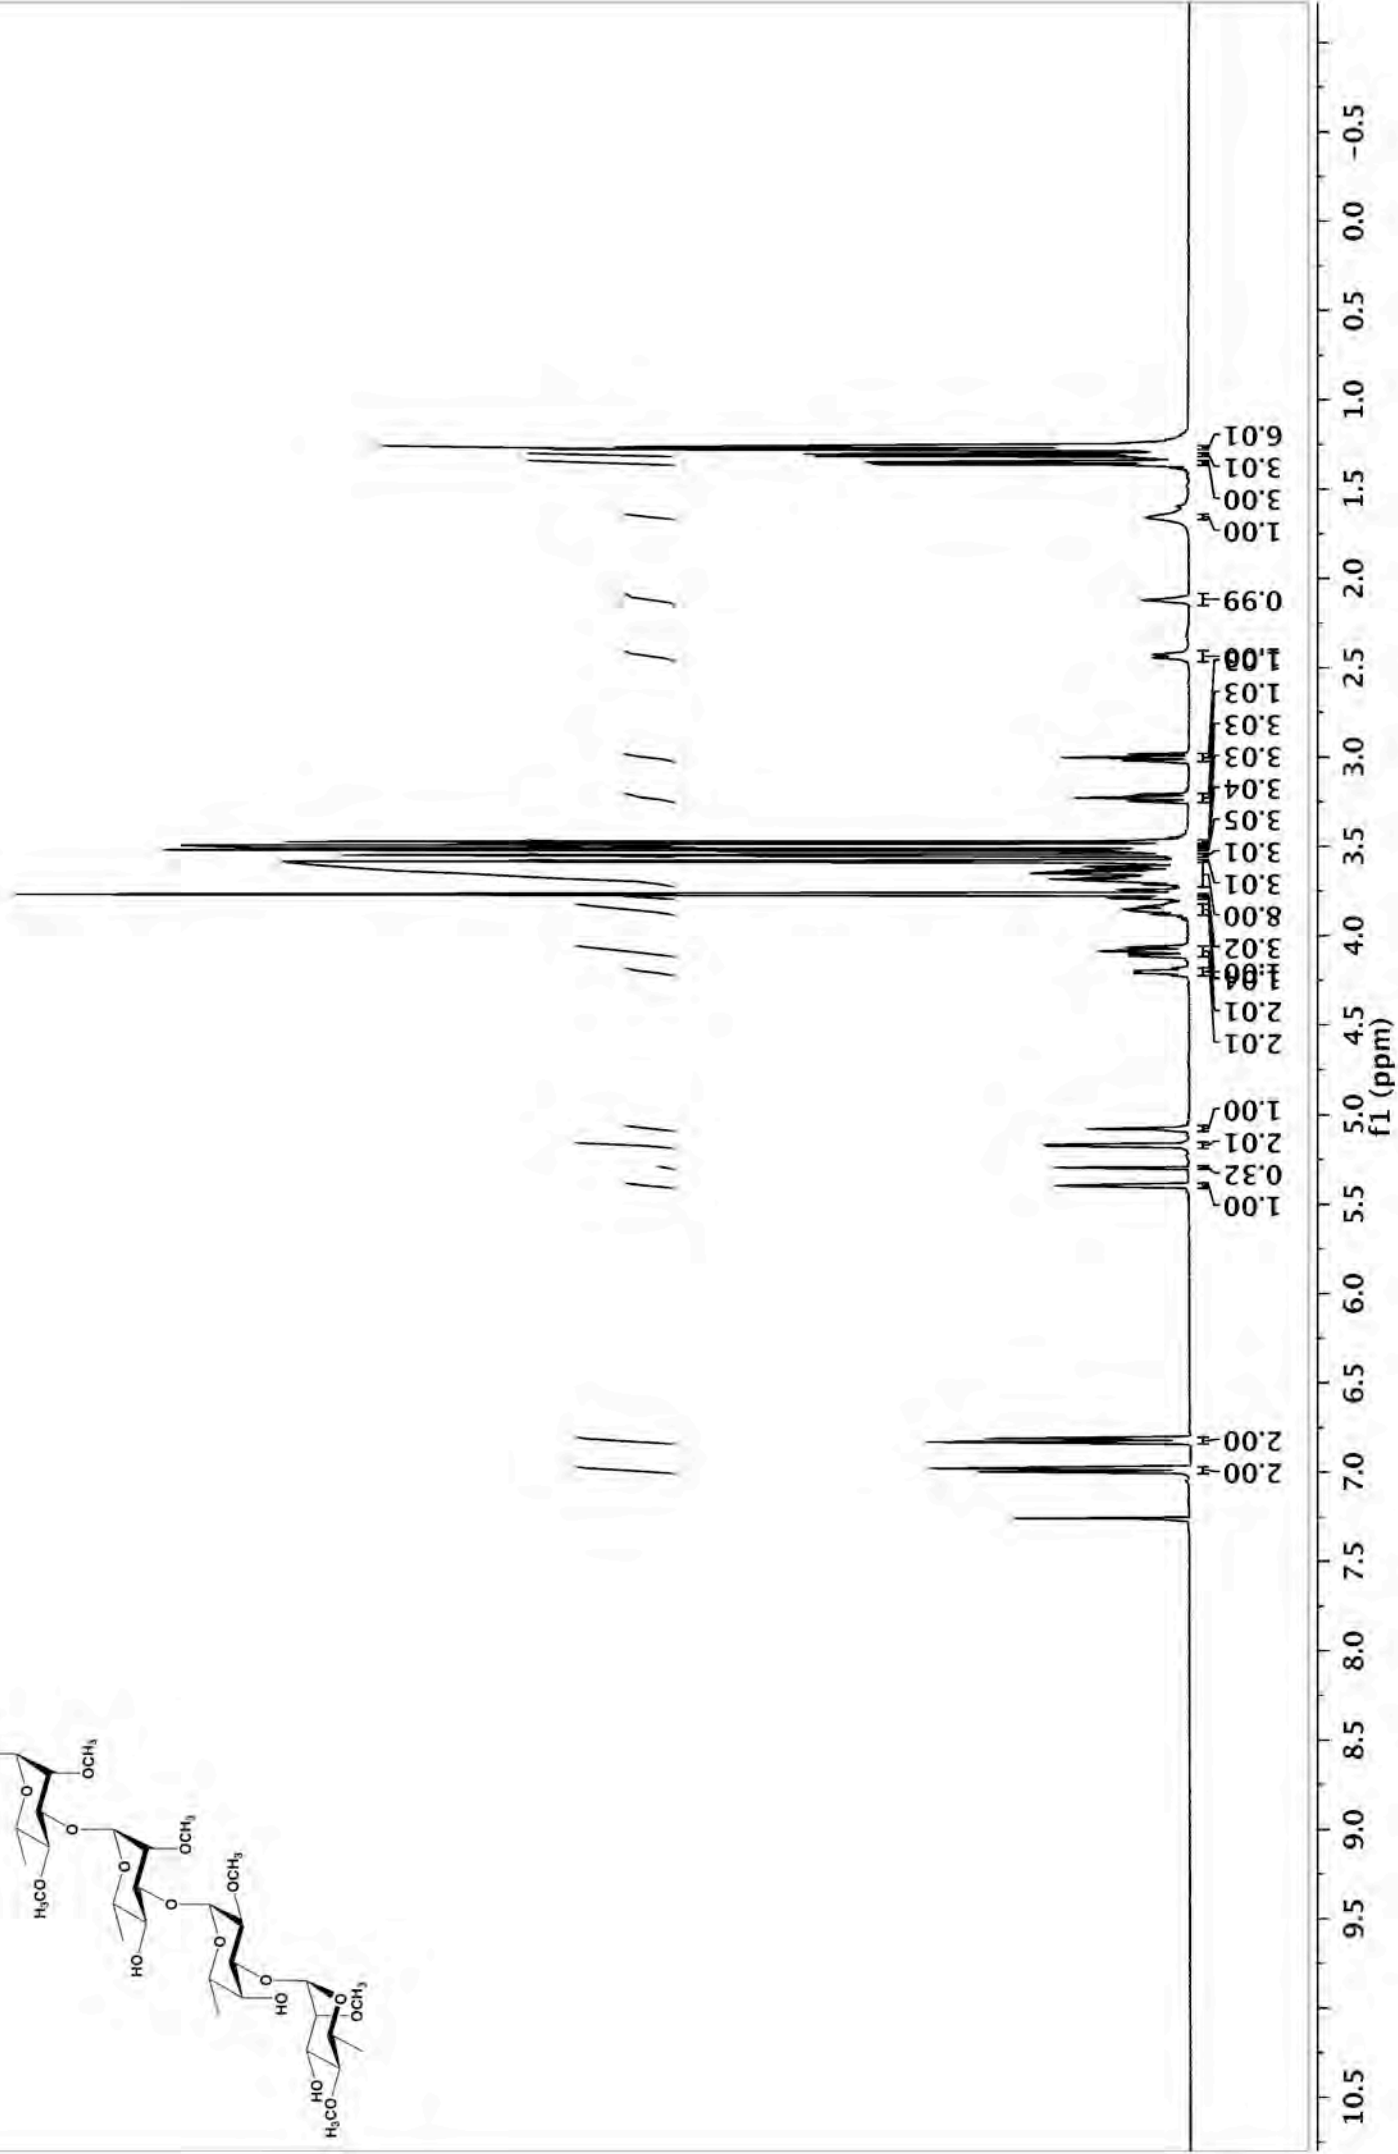

<sup>13</sup>C NMR of compound 14

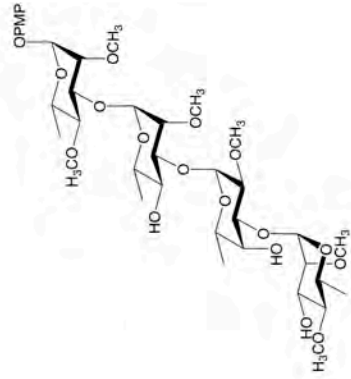

- 154.9014
- 150.4062
- 117.4824
- 114.6093
- 100.5830
- 99.3429
- 97.8722
- 95.6071
- 80.6551
- 78.8762
- 77.2606
- 77.0064
- 76.7522
- 71.6297
- 68.1777
- 66.2635
- 61.0444
- 58.9975
- 58.7467
- 58.6202
- 55.6534
- 29.6887
- 17.9595
- 17.9412
- 17.8639
- 16.2646

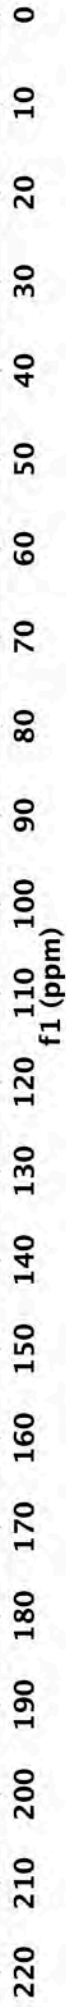

<sup>1</sup>H NMR of compound 15

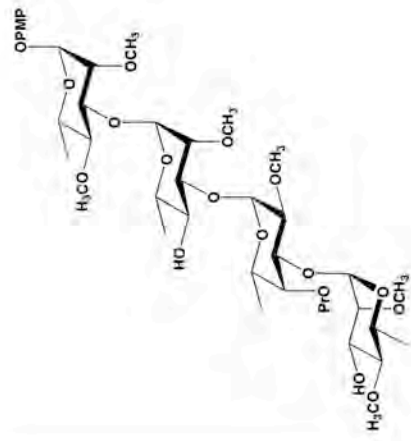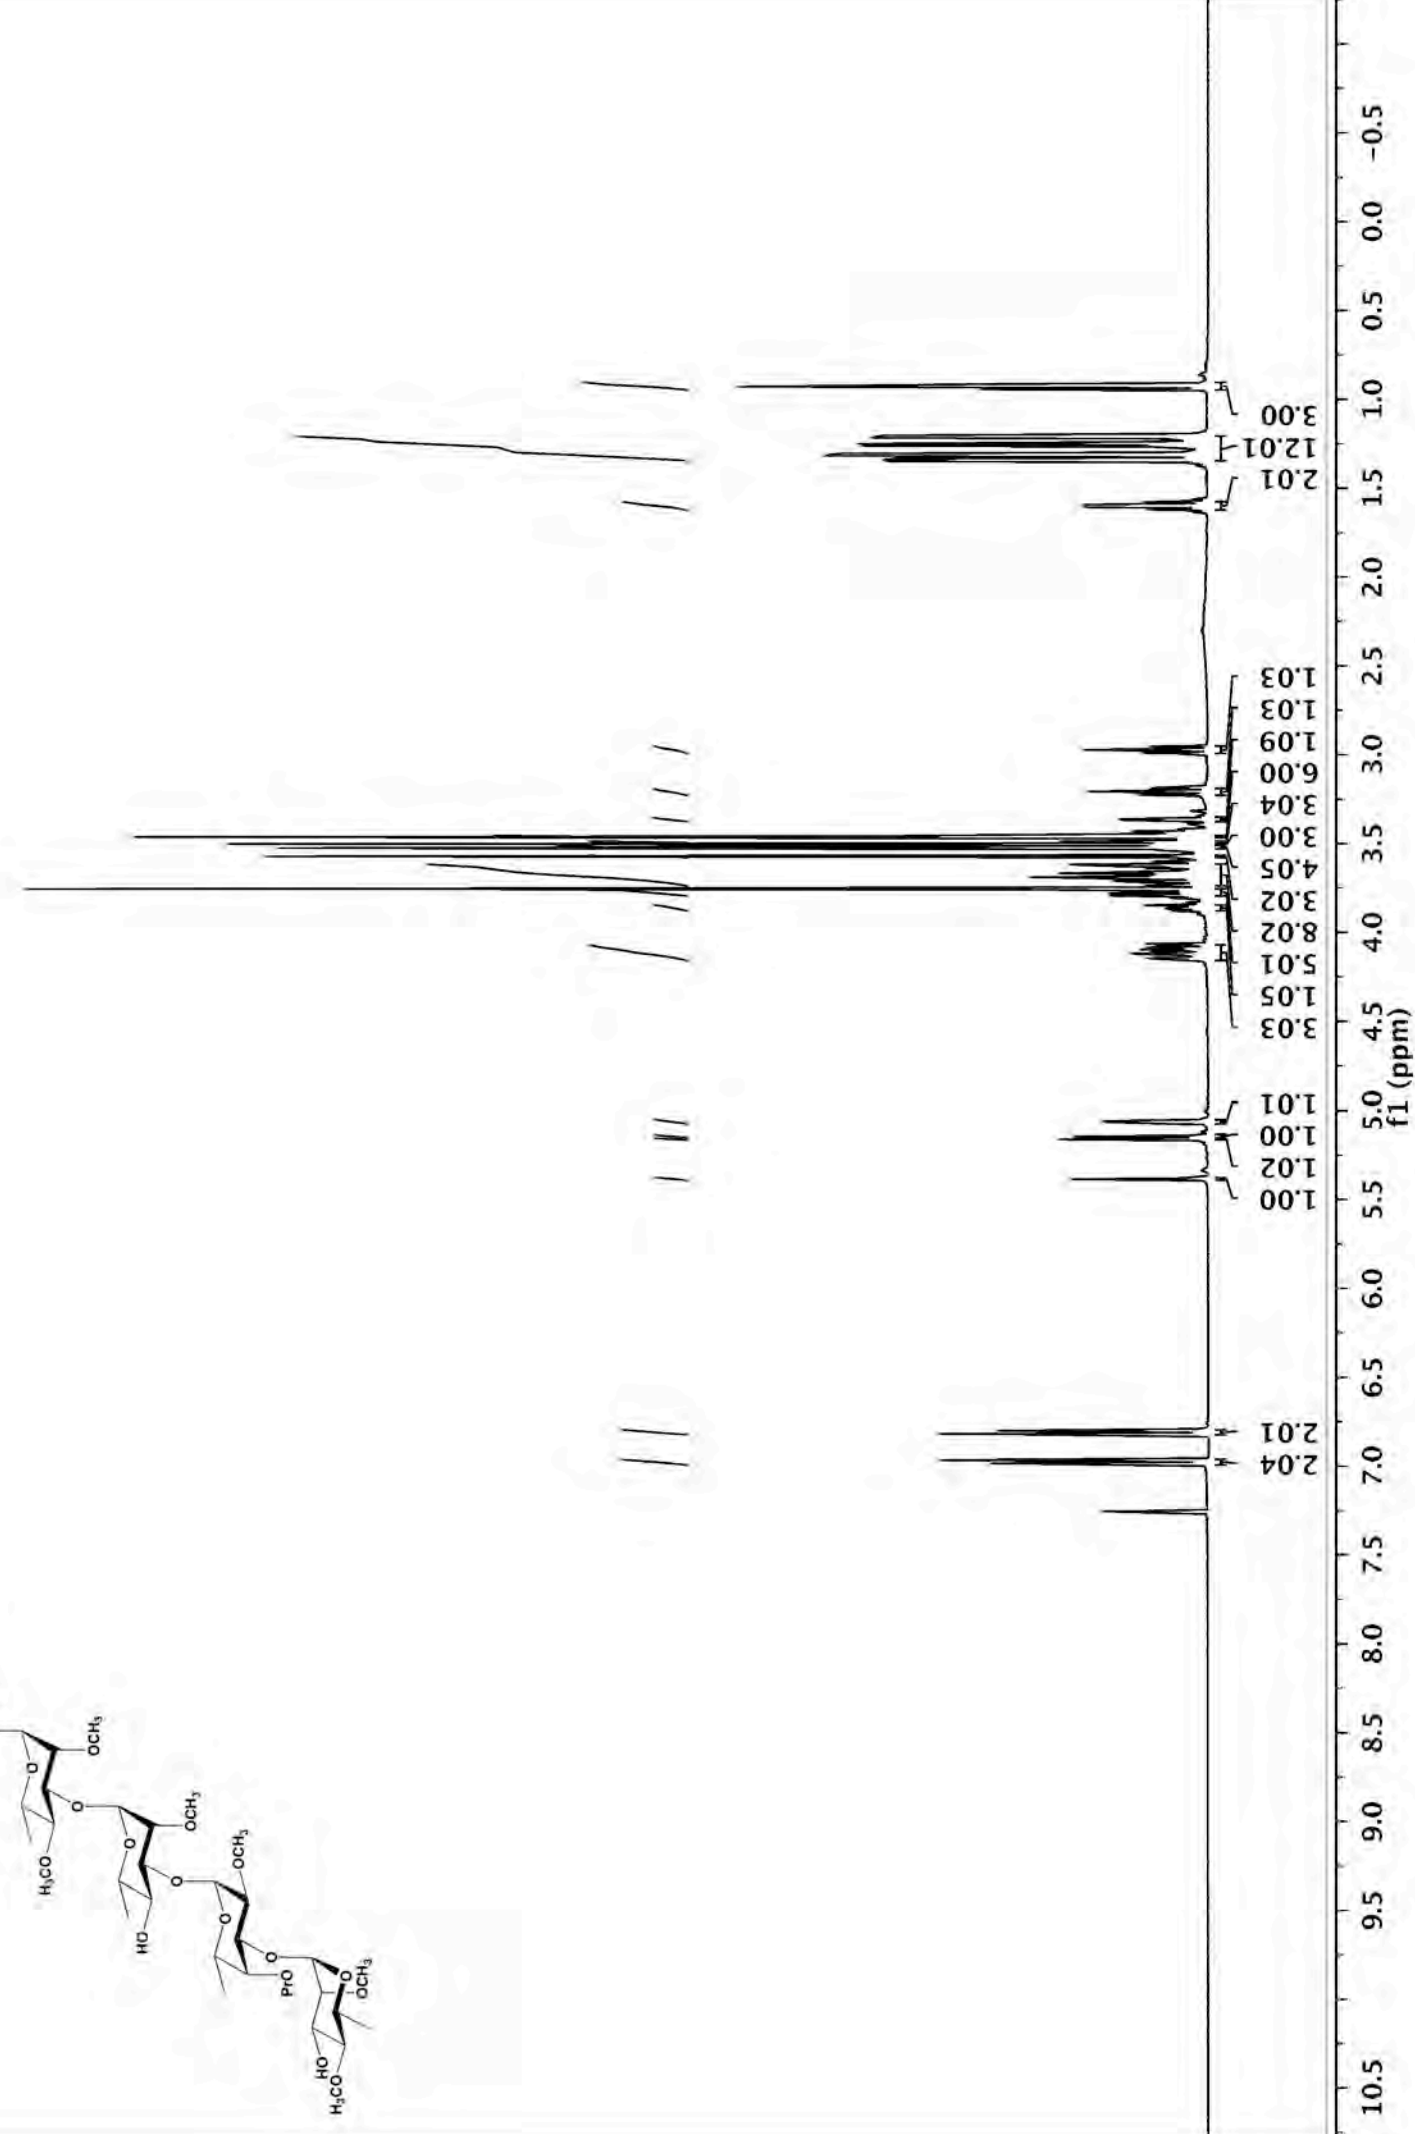



<sup>13</sup>C NMR of compound 15

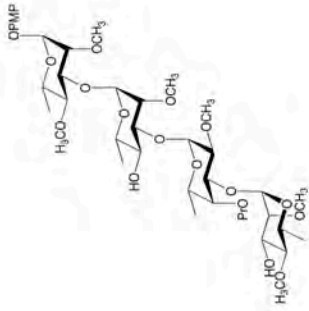

154.89  
150.41

117.47  
114.60

100.48  
99.48  
97.51  
95.57

83.80  
80.80  
80.69  
80.33  
80.28  
77.27  
77.02  
76.76  
71.53  
71.19  
68.68  
58.91  
58.52  
55.64

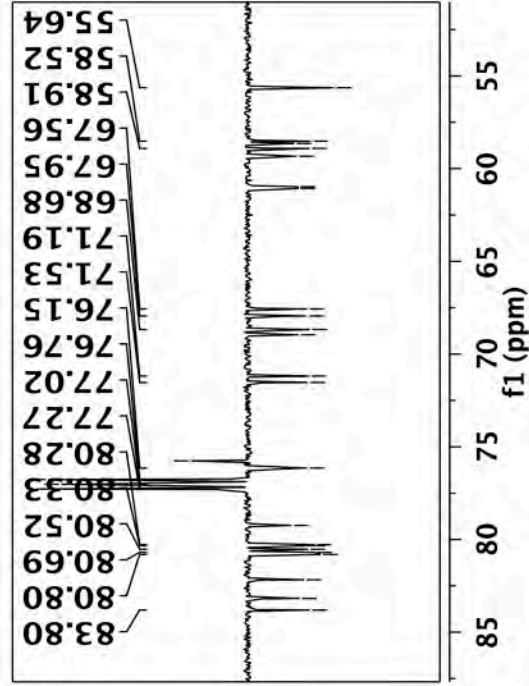

220 210 200 190 180 170 160 150 140 130 120 110 100 90 80 70 60 50 40 30 20 10 0

# <sup>1</sup>H NMR of Compound 16

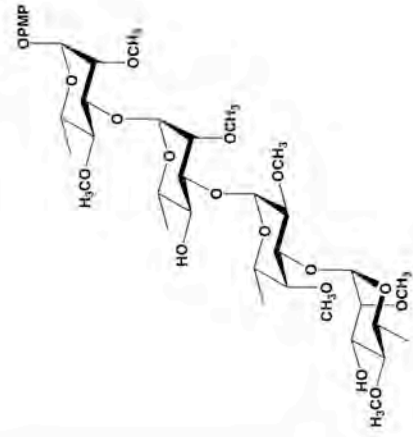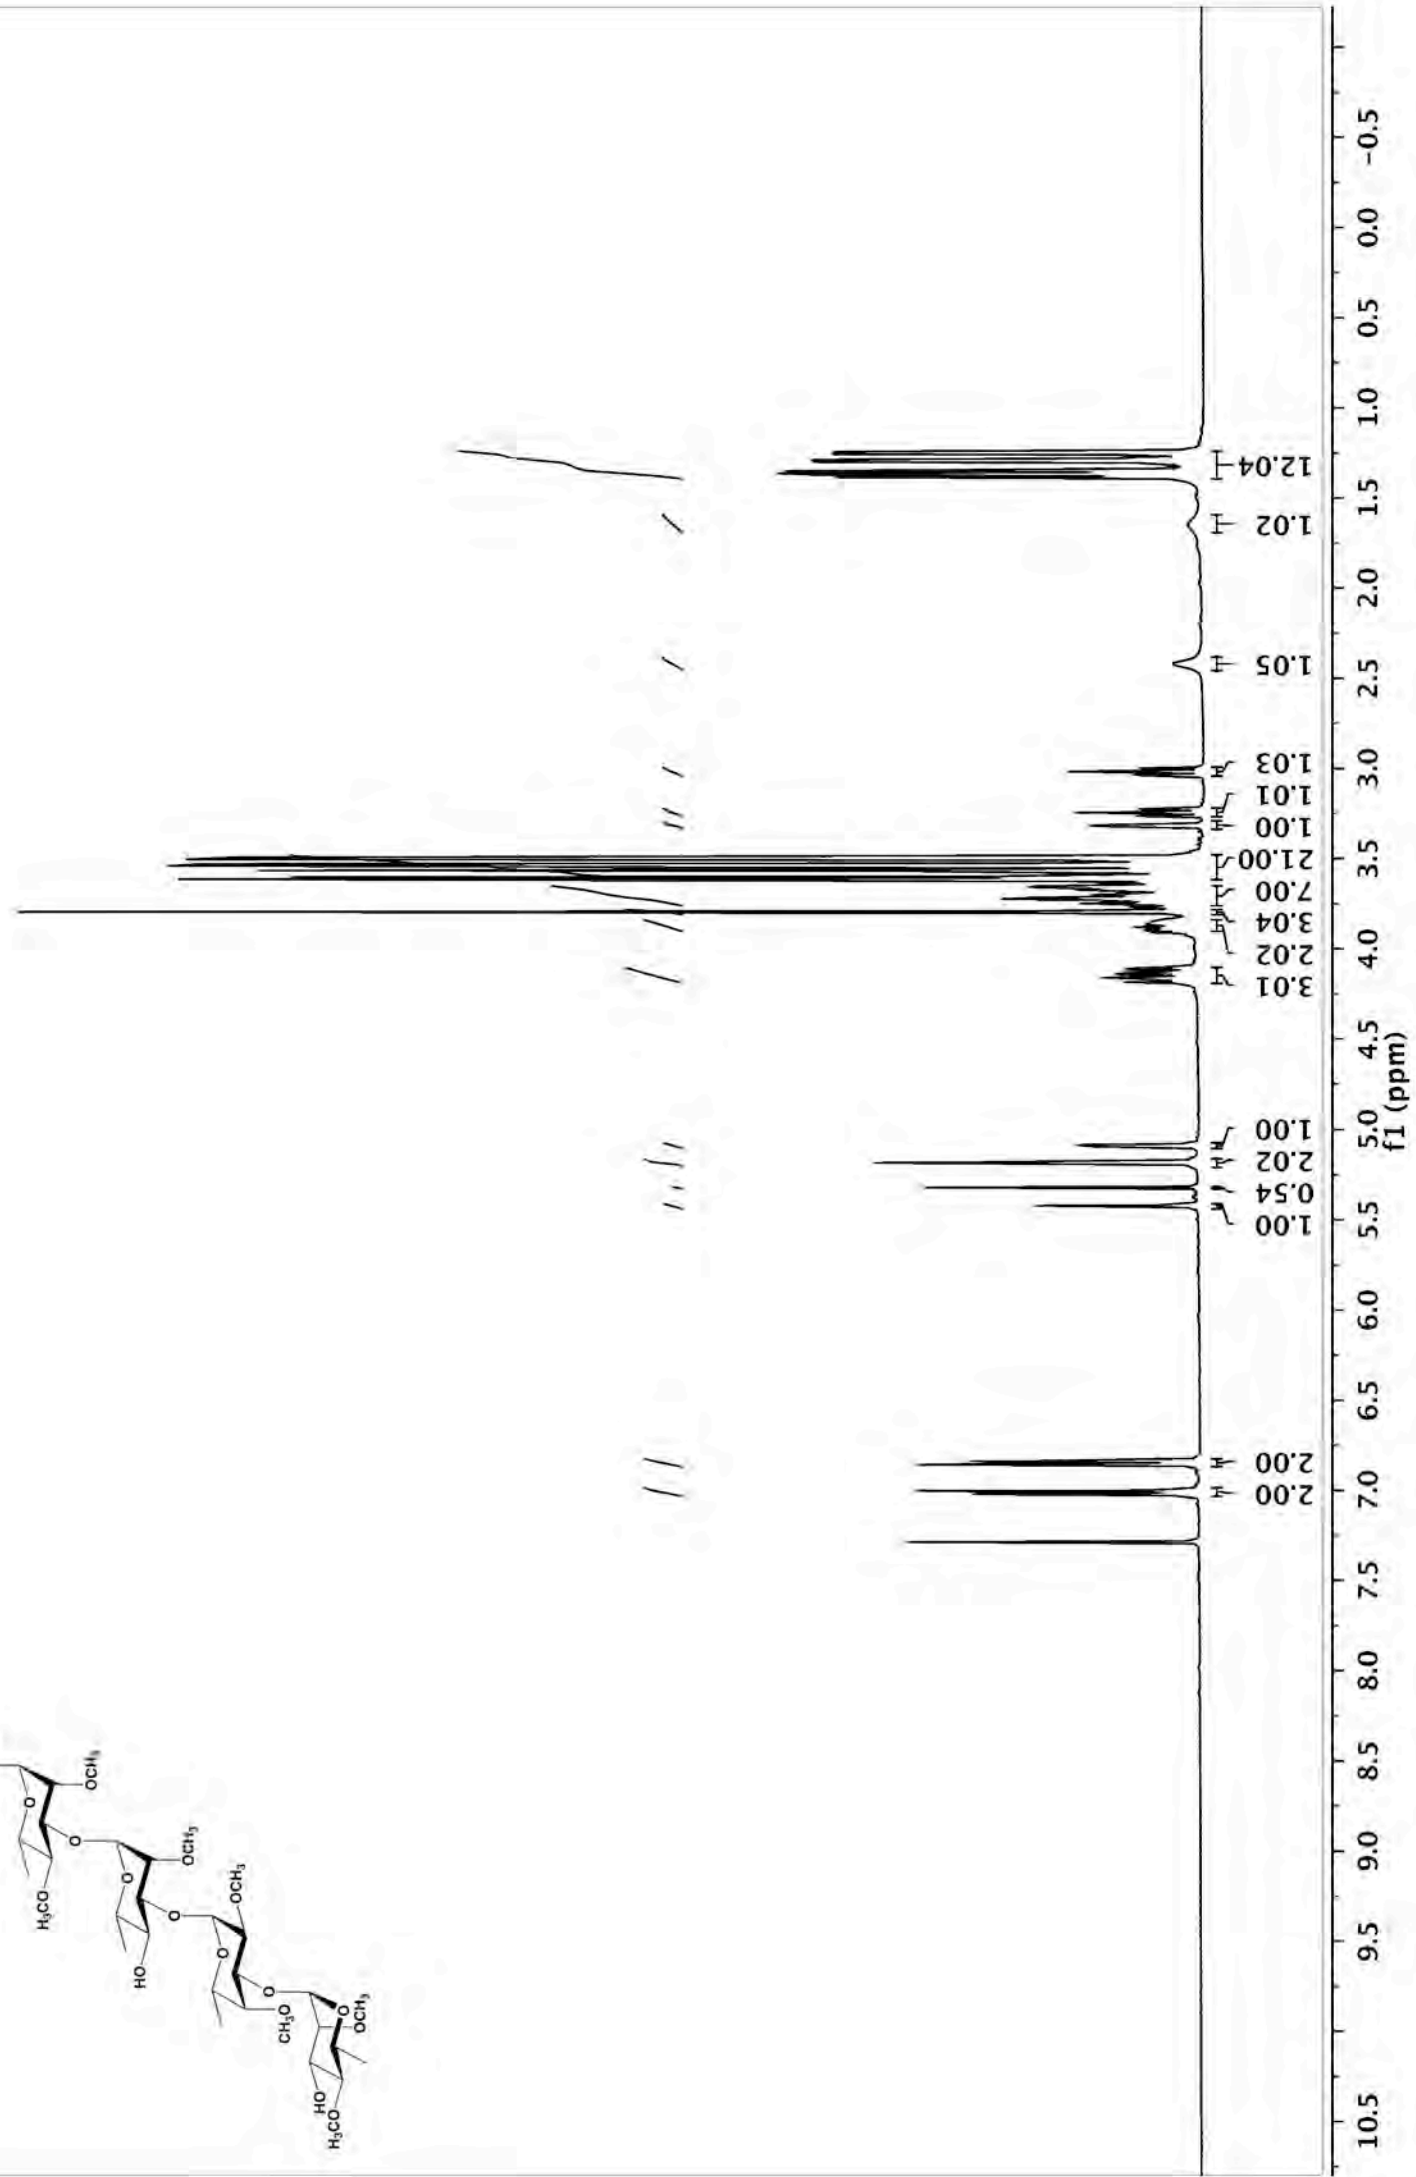



<sup>1</sup>H NMR of compound 17

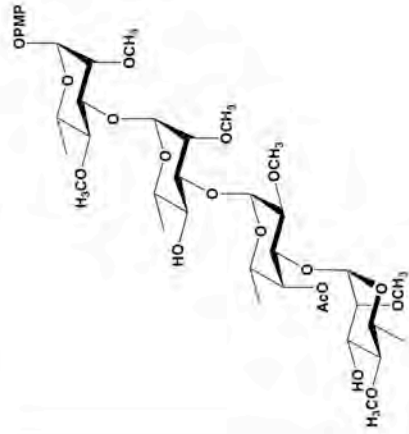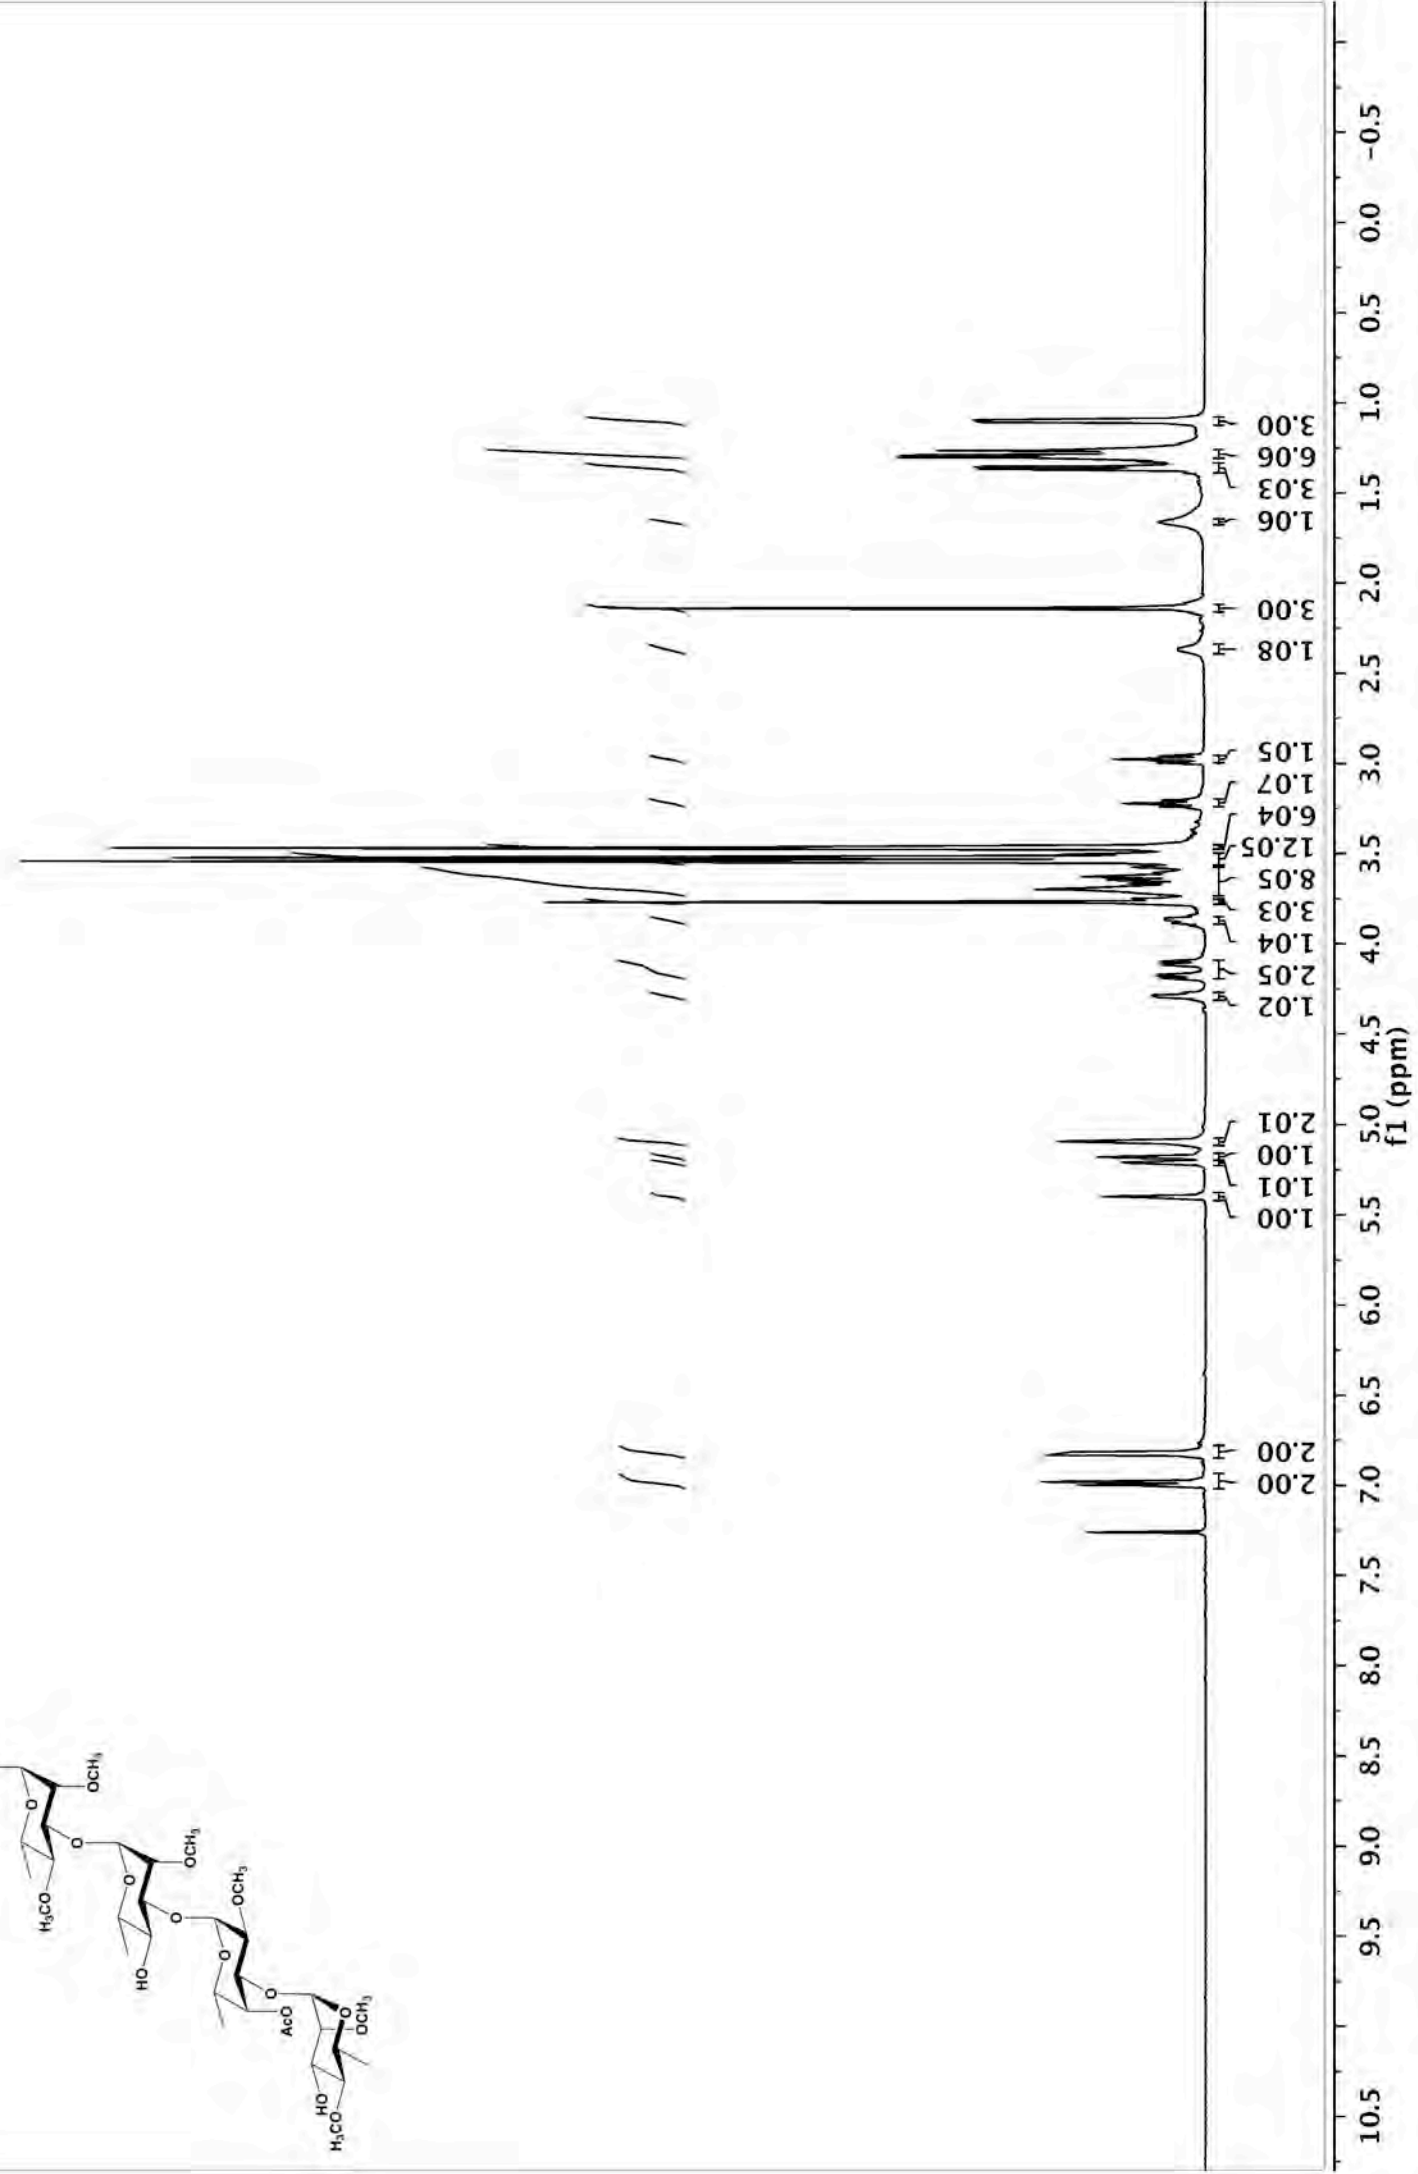

<sup>13</sup>C NMR of compound 17

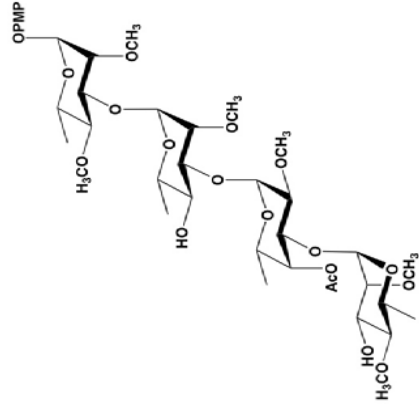

- 170.29
- 154.92
- 150.40
- 117.48
- 114.62
- 100.51
- 99.25
- 98.06
- 95.56
- 83.37
- 80.81
- 80.53
- 80.34
- 79.64
- 77.26
- 77.00
- 76.75
- 70.66
- 67.85
- 65.89
- 61.01
- 60.33
- 59.66
- 58.95
- 58.66
- 58.57
- 55.65

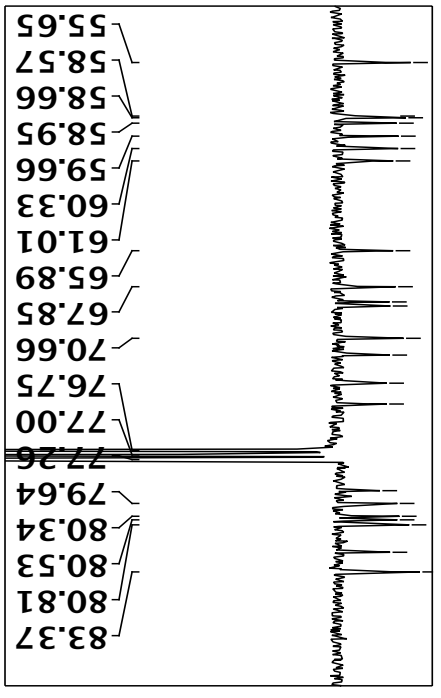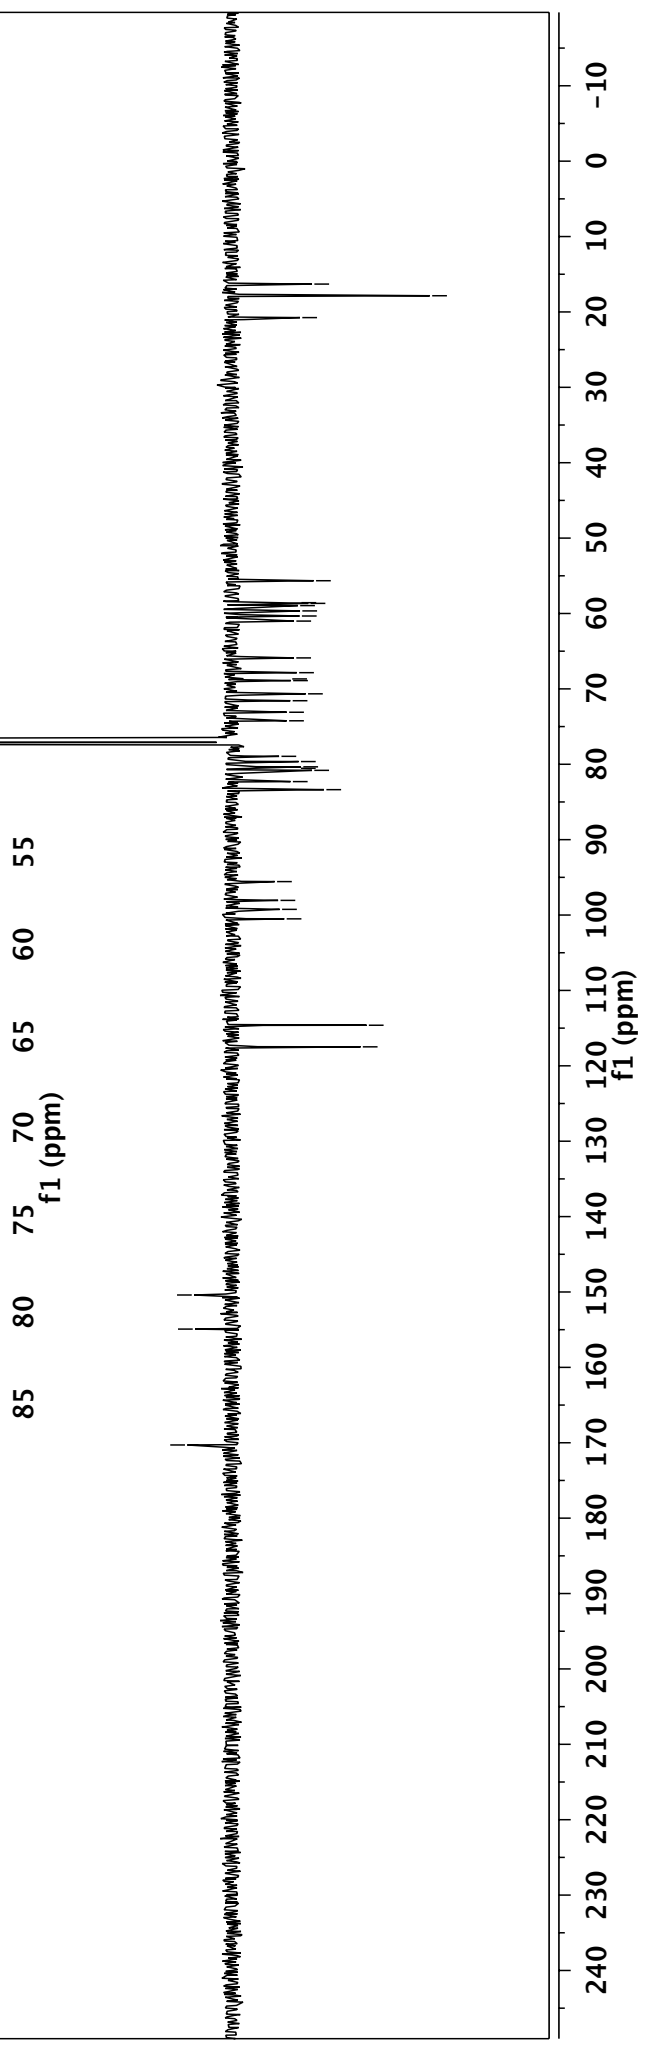

<sup>13</sup>C NMR of compound 18

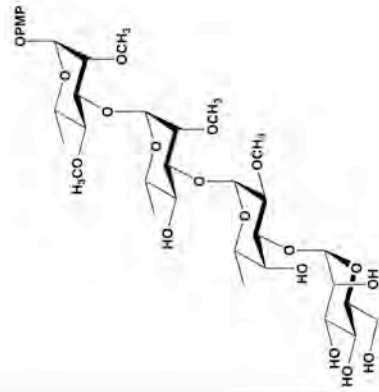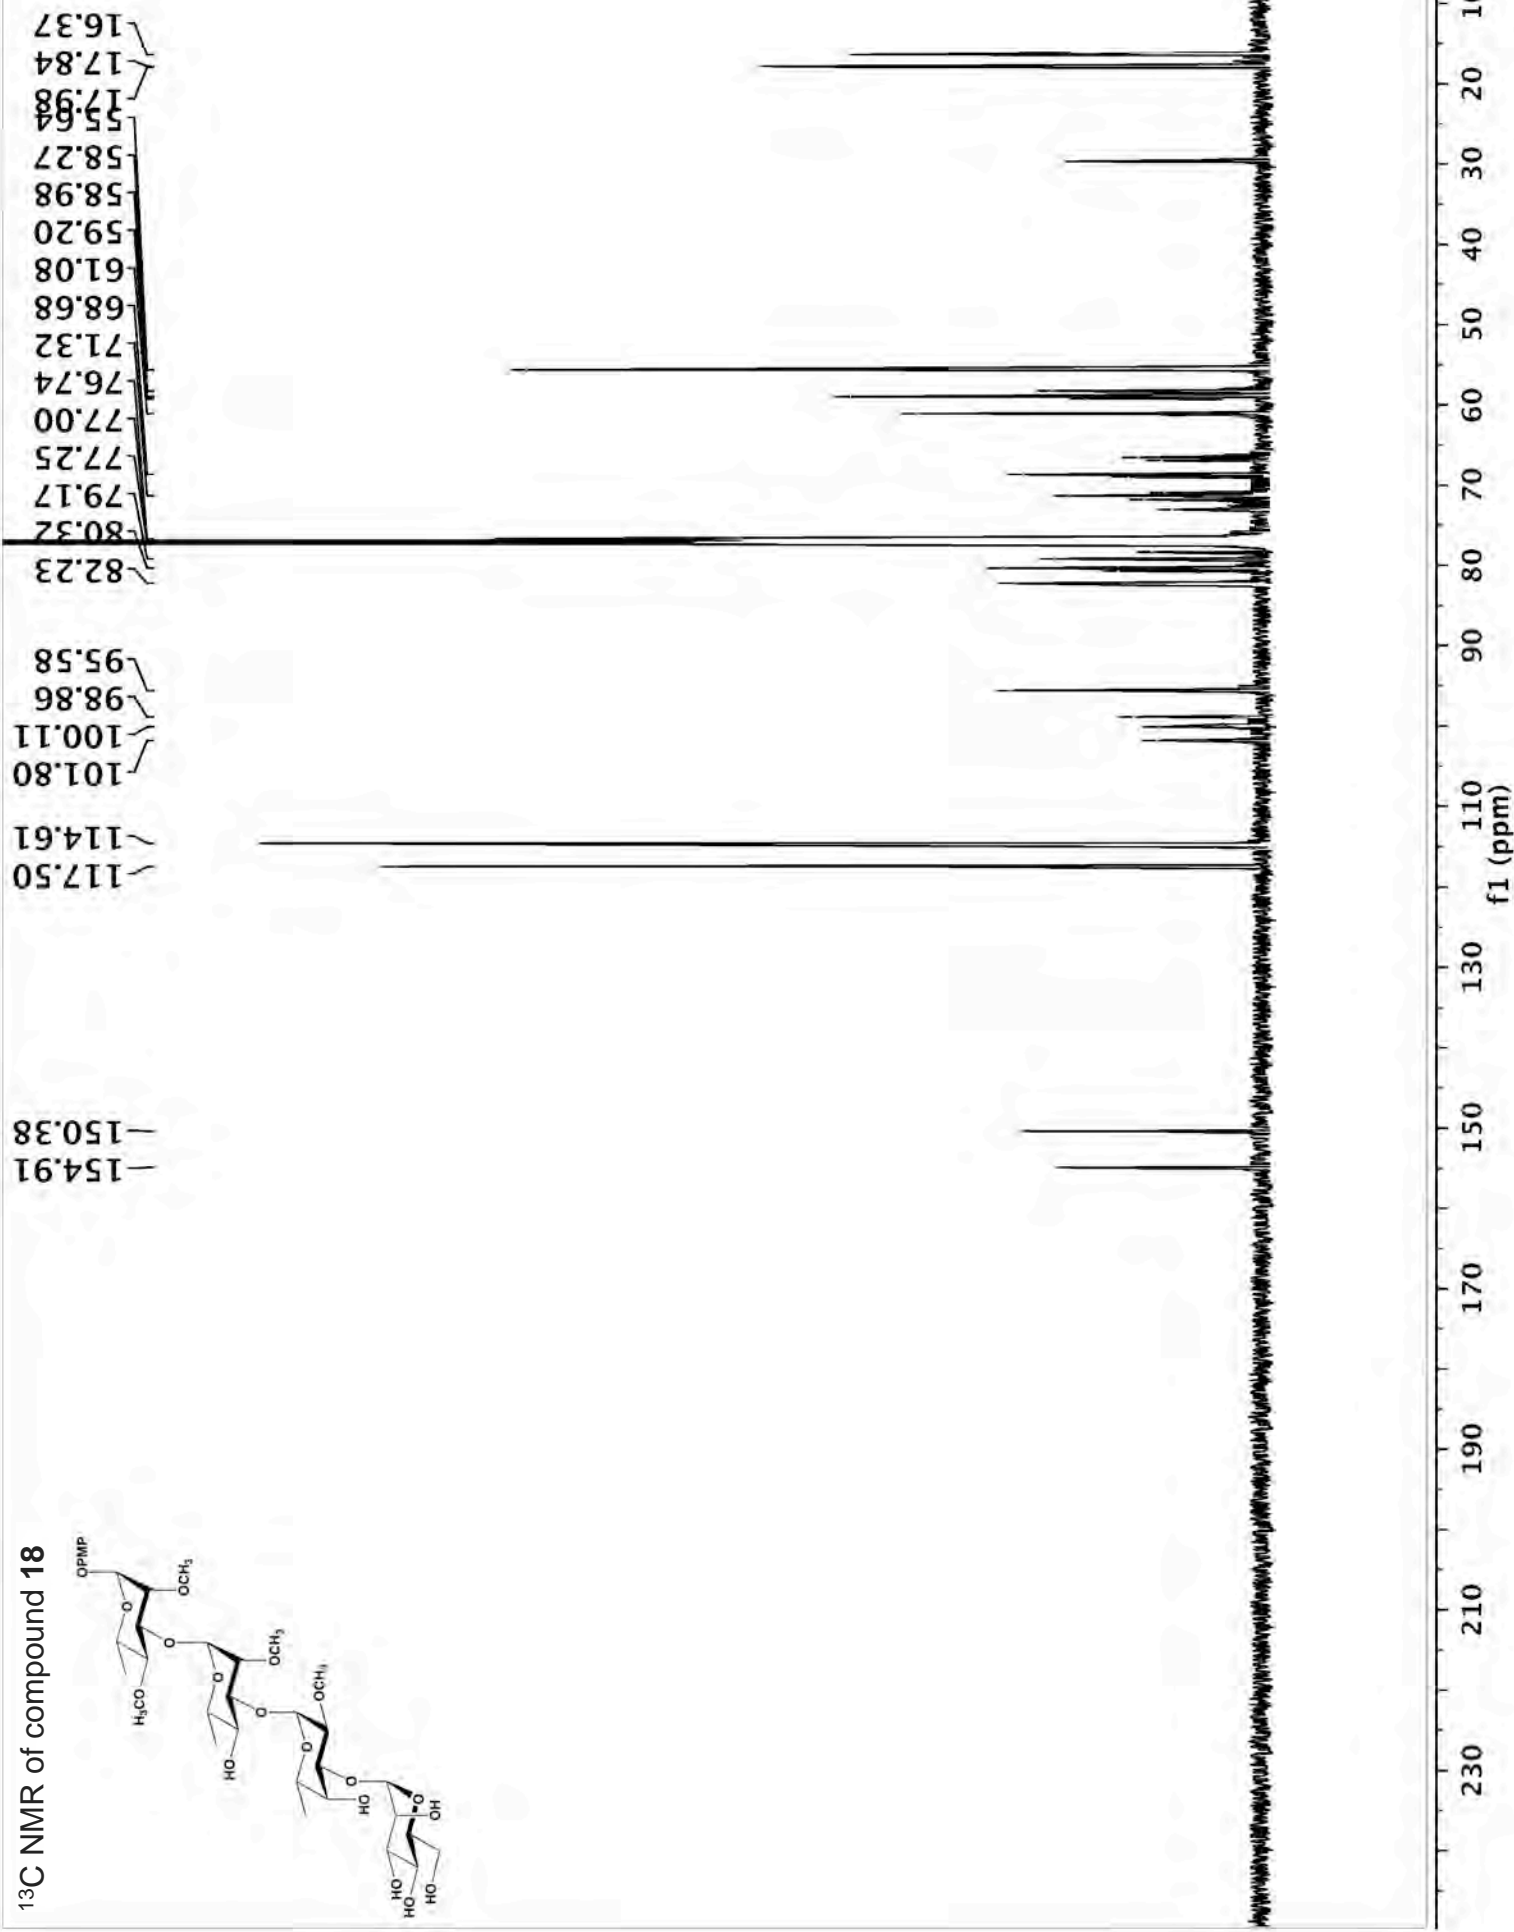

<sup>1</sup>H NMR of compound 18

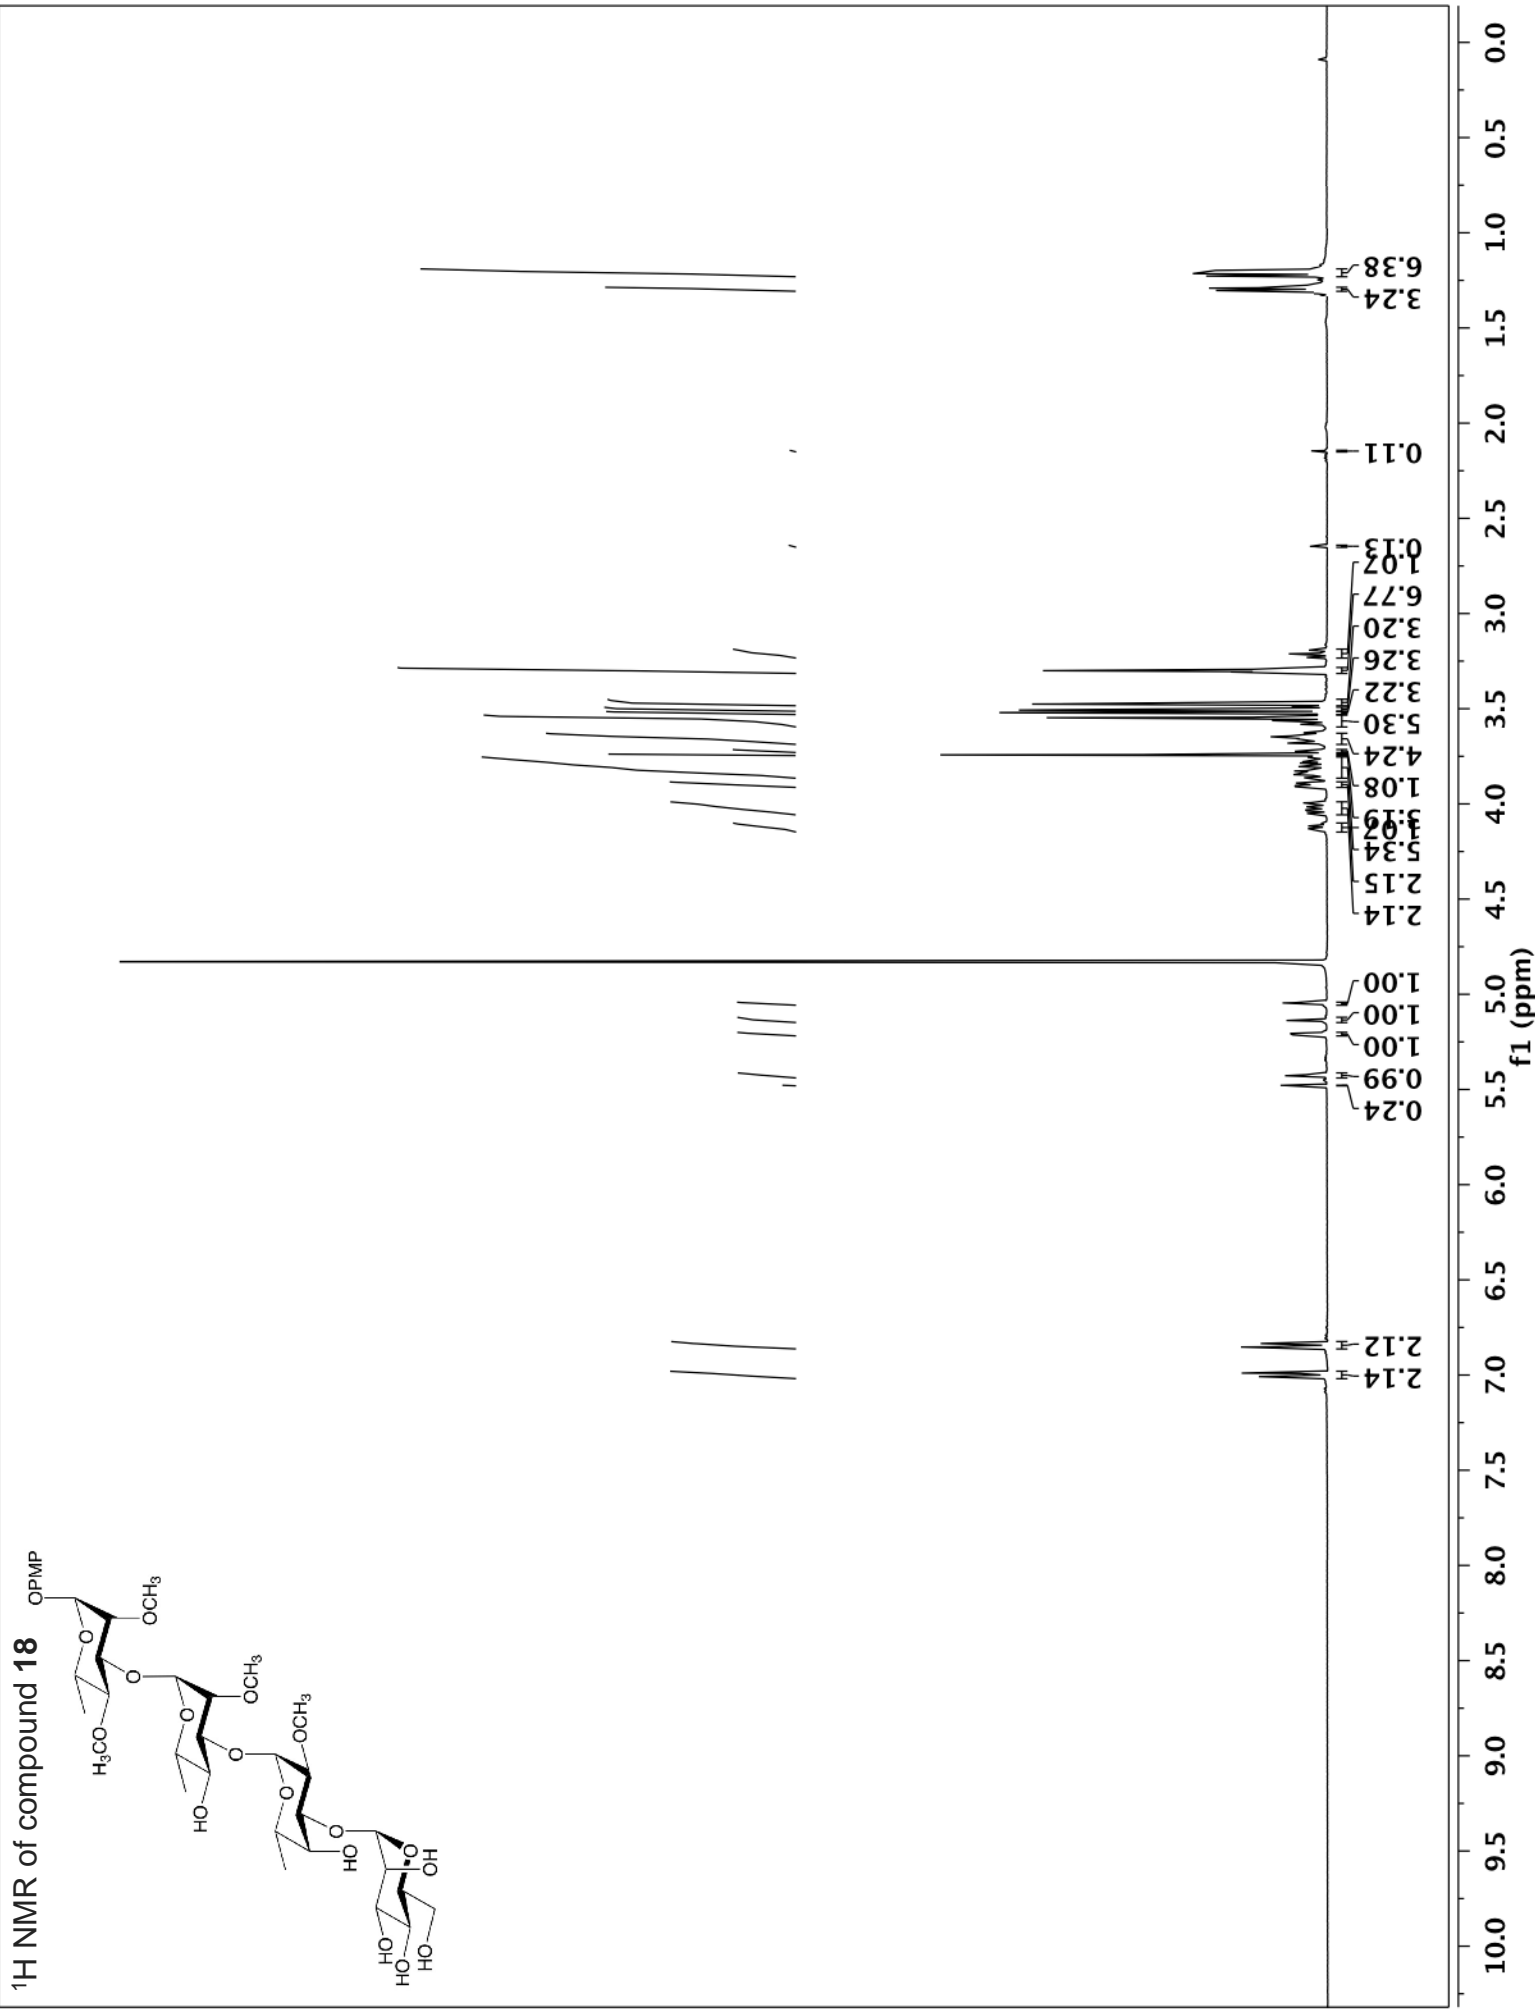

<sup>13</sup>C NMR of compound 19

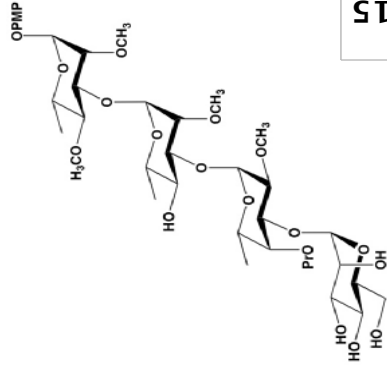

154.90  
150.40  
117.48  
114.61  
100.25  
99.25  
97.75  
95.54  
80.57  
80.53  
80.29  
77.27  
77.02  
76.77  
68.68  
61.09  
59.13  
58.90  
58.49  
55.52  
53.52  
17.91  
17.84  
16.51  
10.77

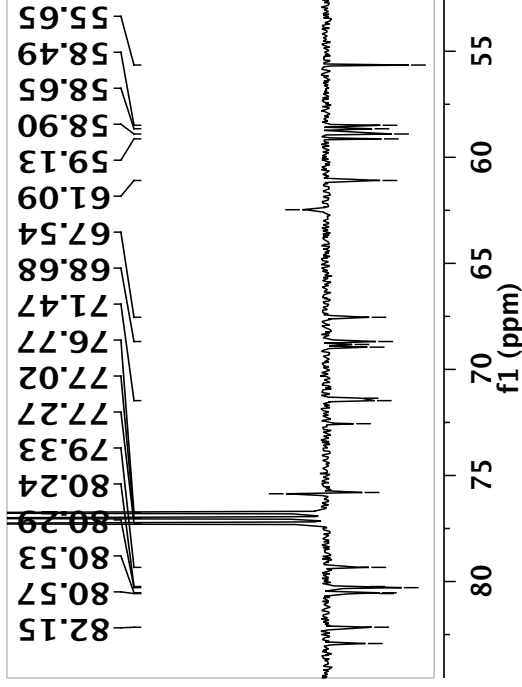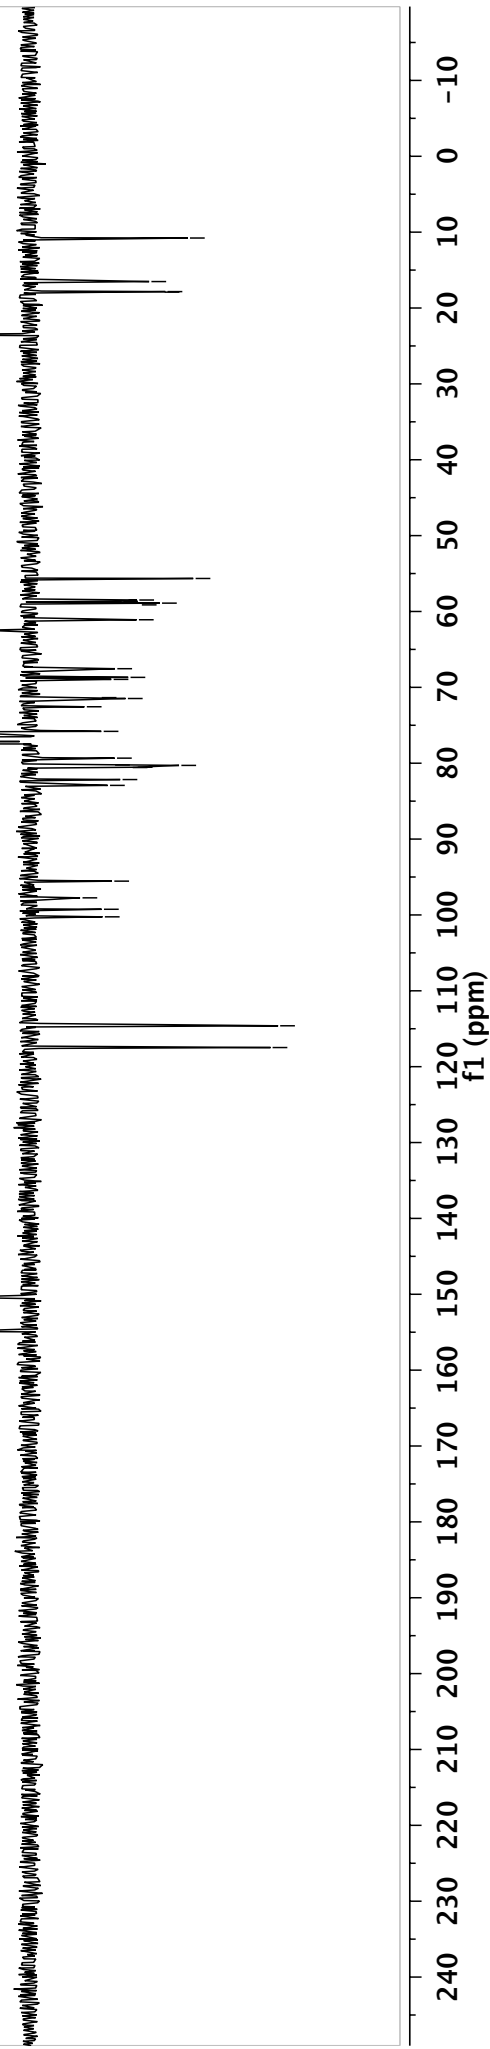



<sup>1</sup>H NMR of compound 19

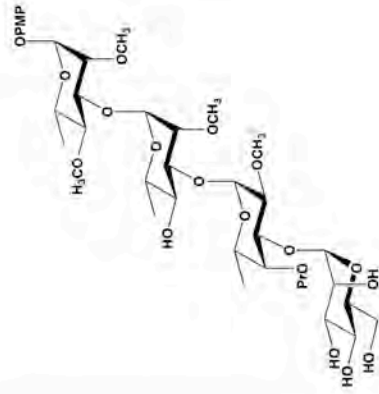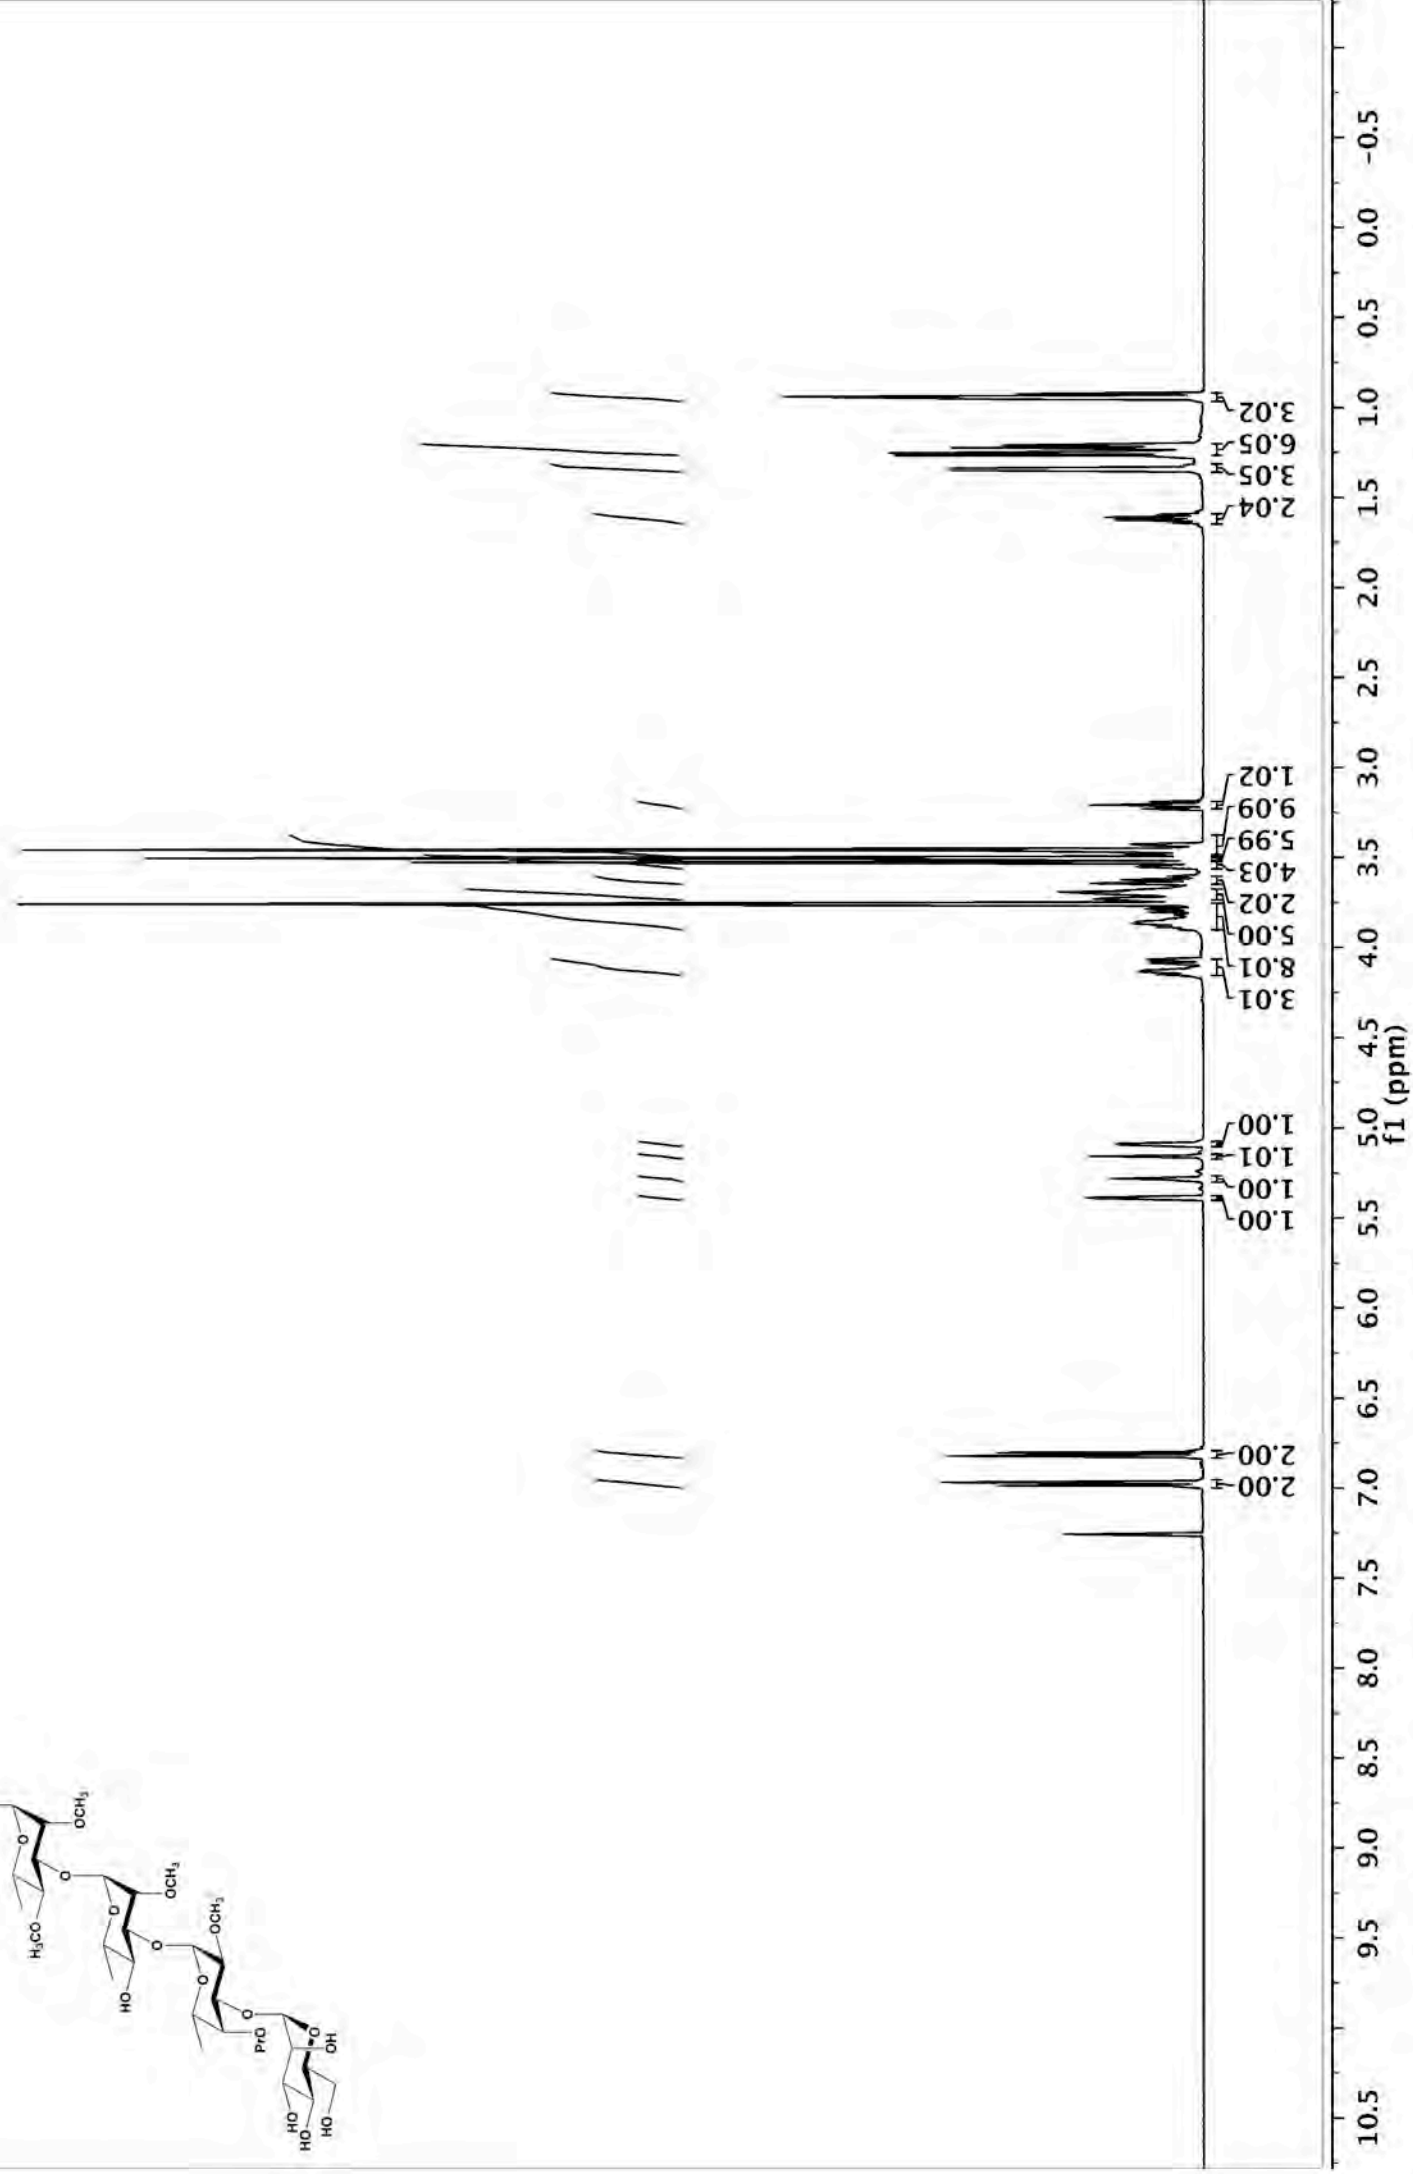



<sup>1</sup>H NMR of compound 20

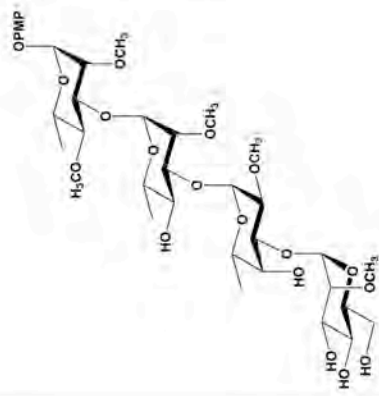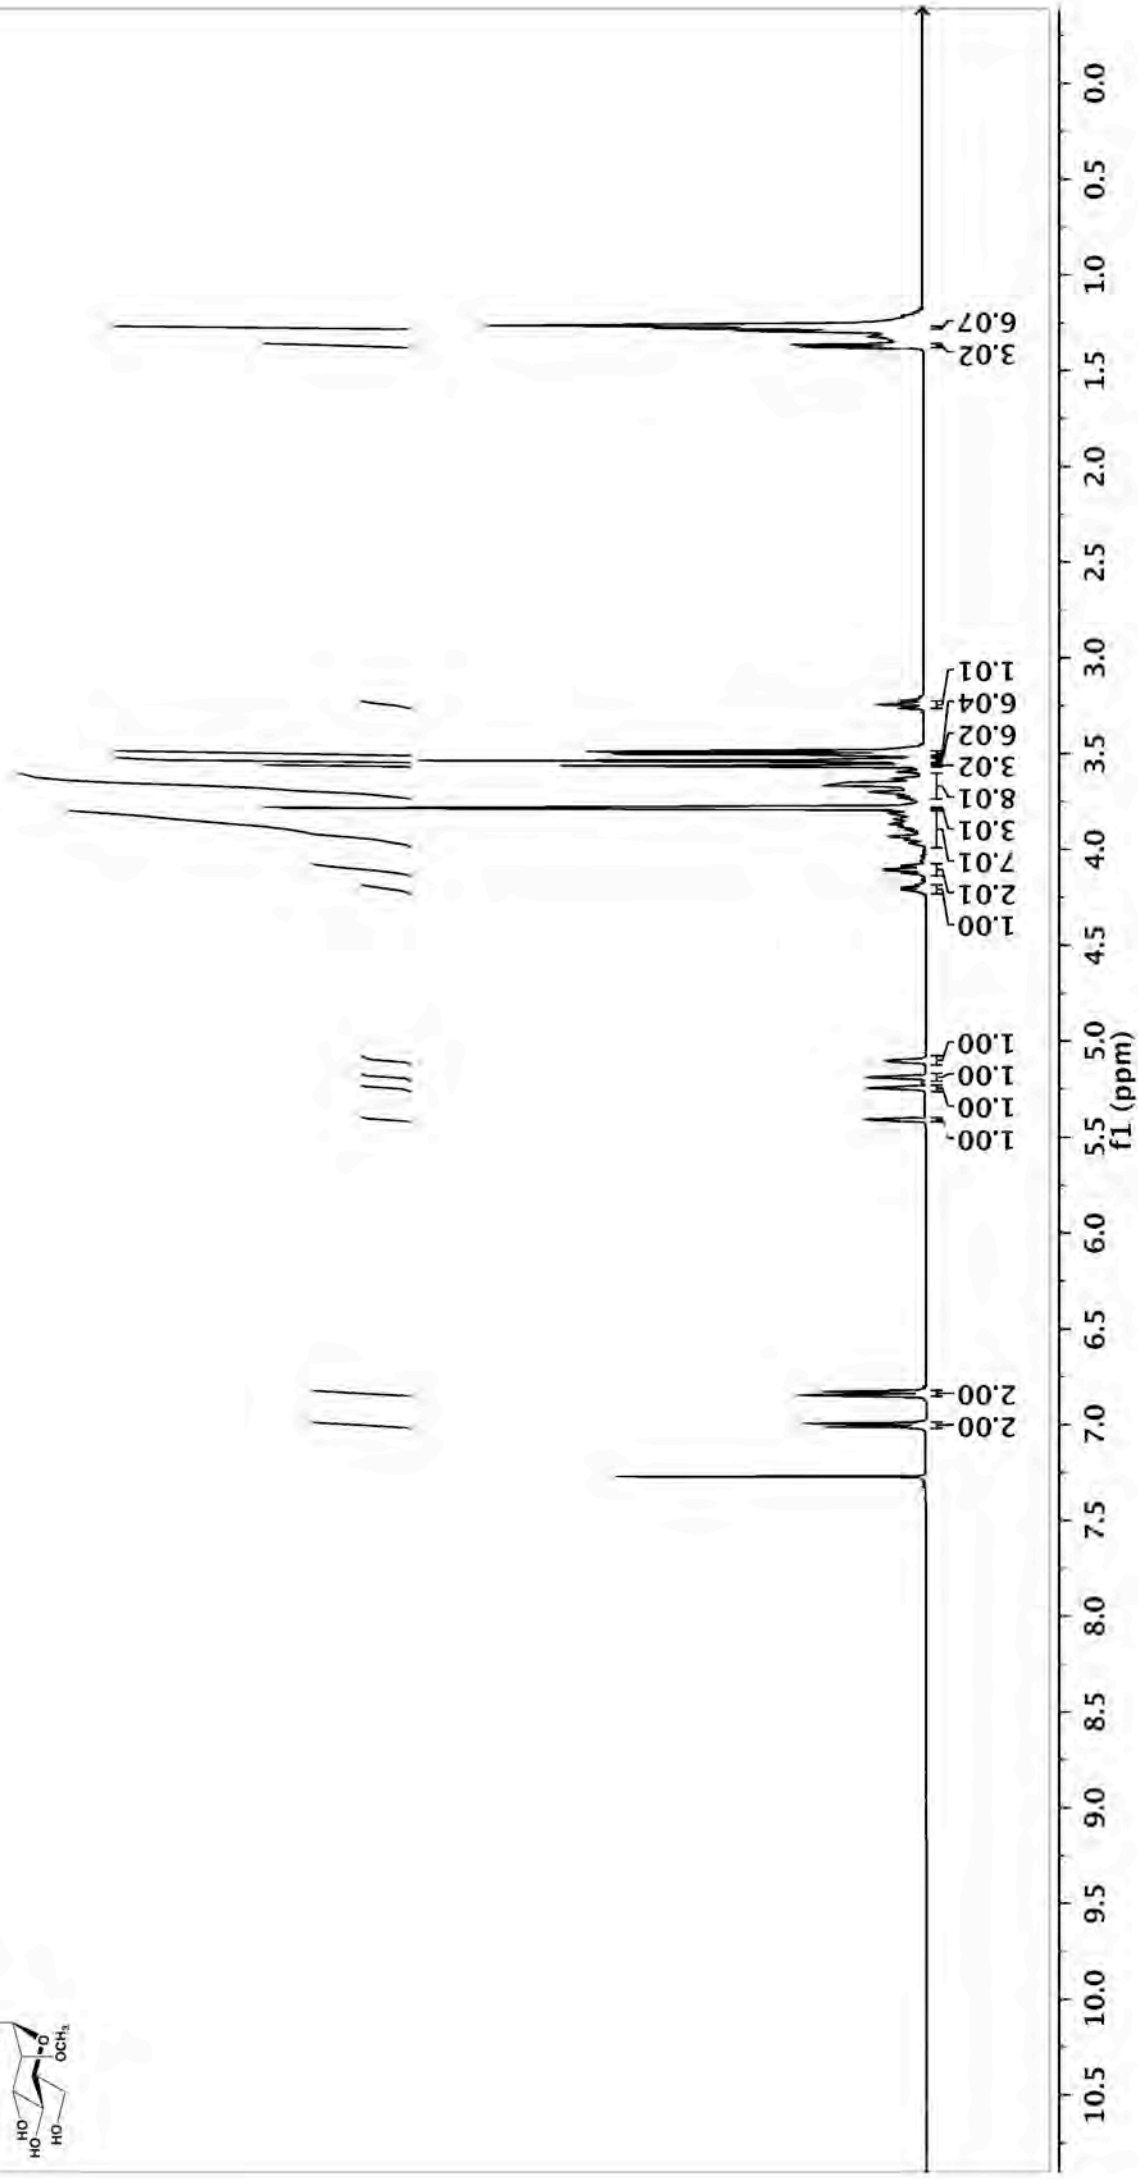

<sup>13</sup>C NMR of compound 21

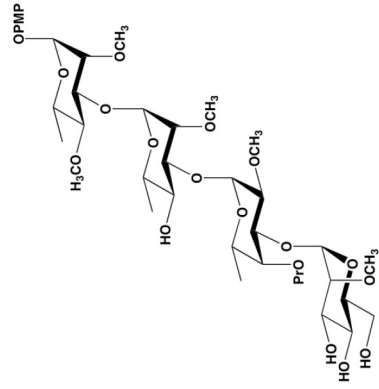

154.90  
150.40

117.48  
114.61

100.25  
99.25  
97.75  
95.55

80.57  
80.53  
80.29  
77.27  
77.02  
76.77  
68.69  
61.09  
59.13  
58.90  
58.49  
55.65  
53.52  
17.91  
17.84  
16.51  
10.77

23

230 210 190 170 150 130 110 90 70 50 30 10 0

f1 (ppm)

<sup>1</sup>H NMR of compound 21

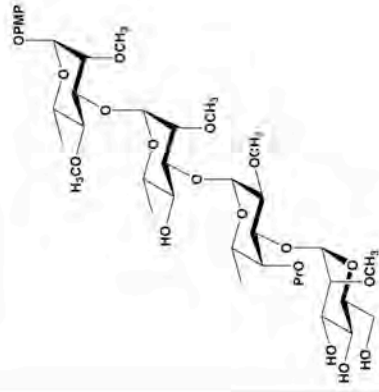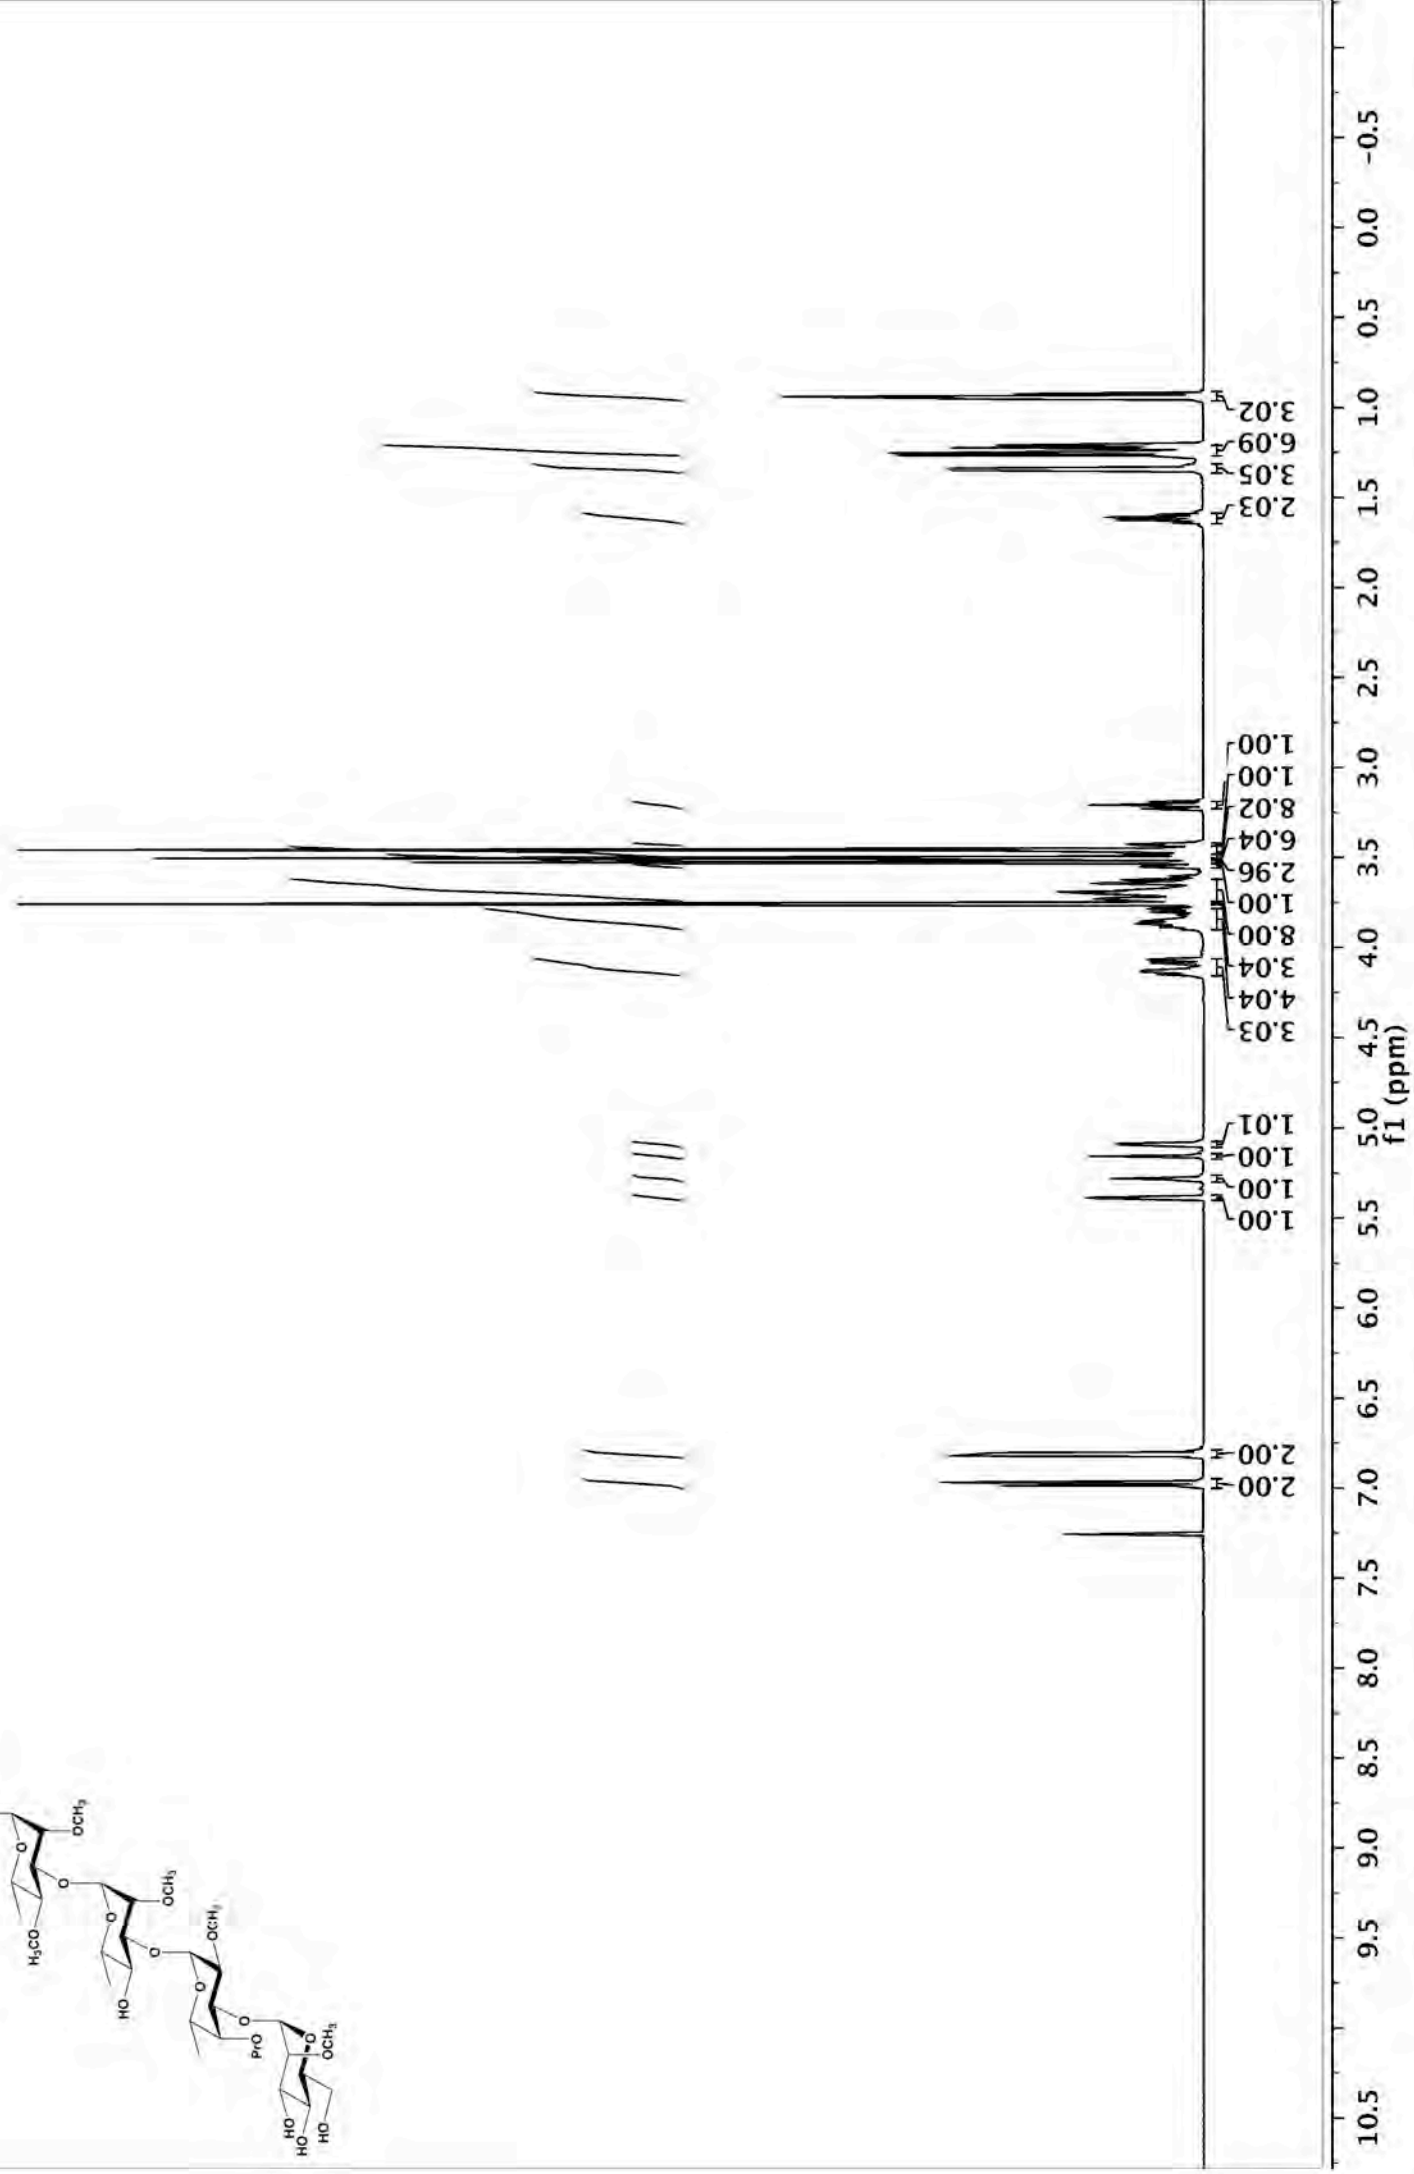

<sup>13</sup>C NMR of compound 22

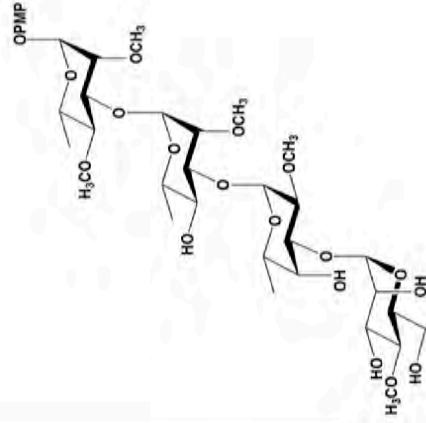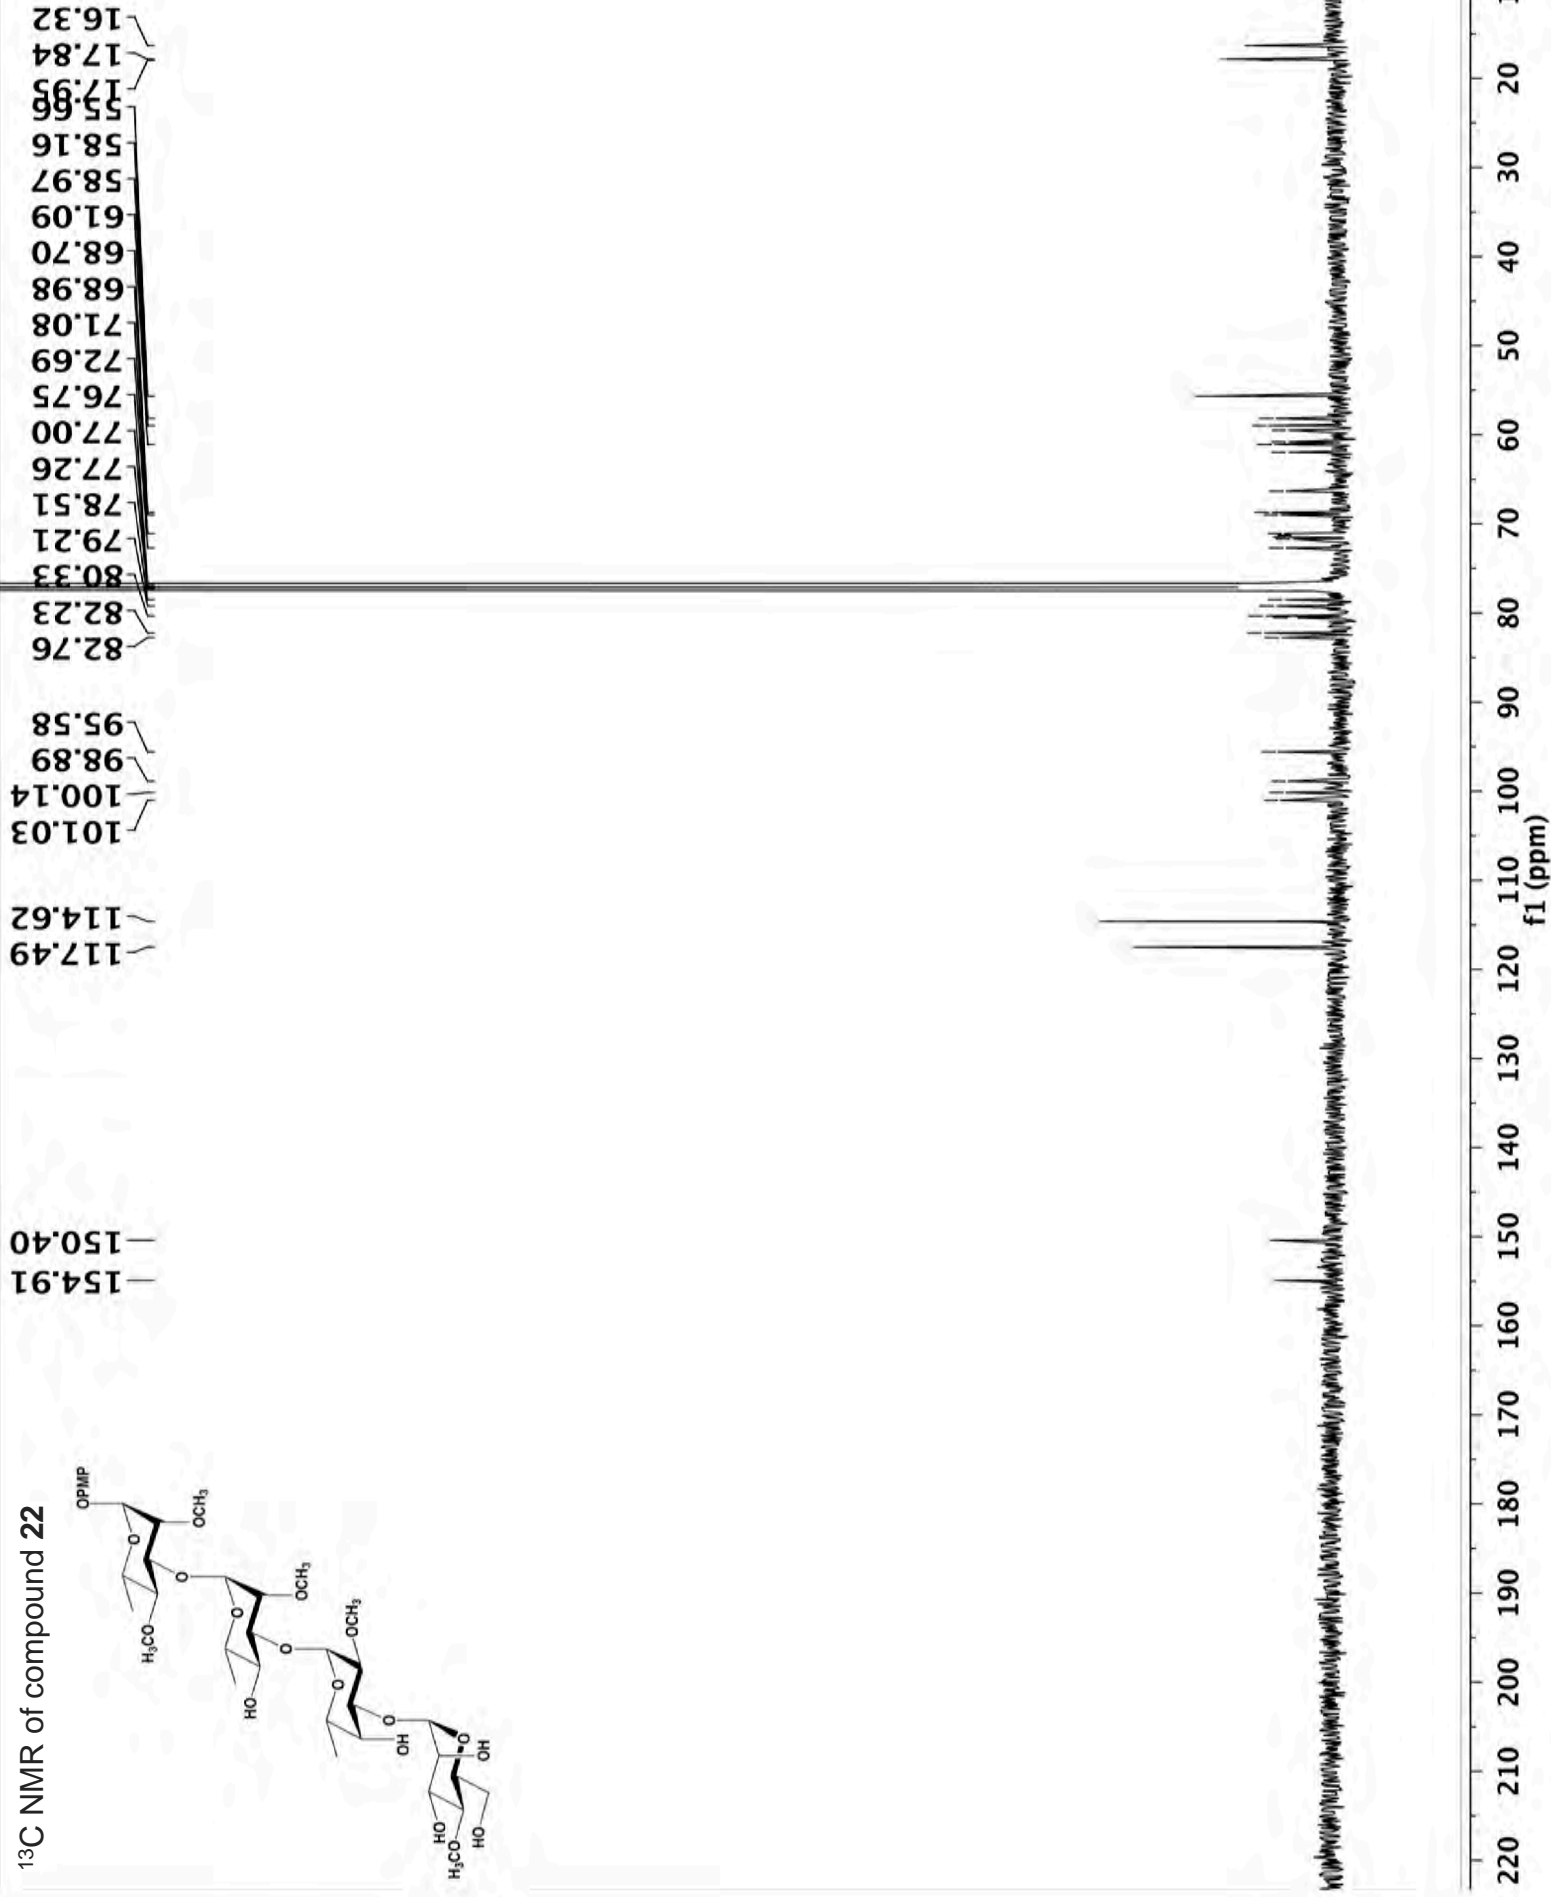

<sup>1</sup>H NMR of compound 22

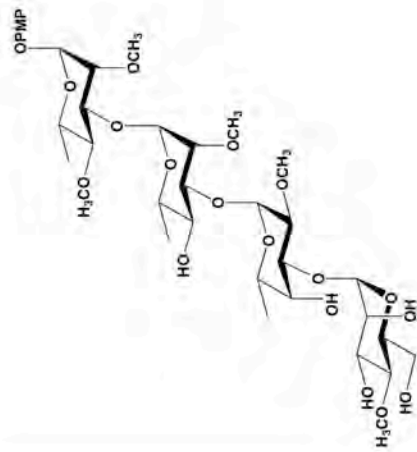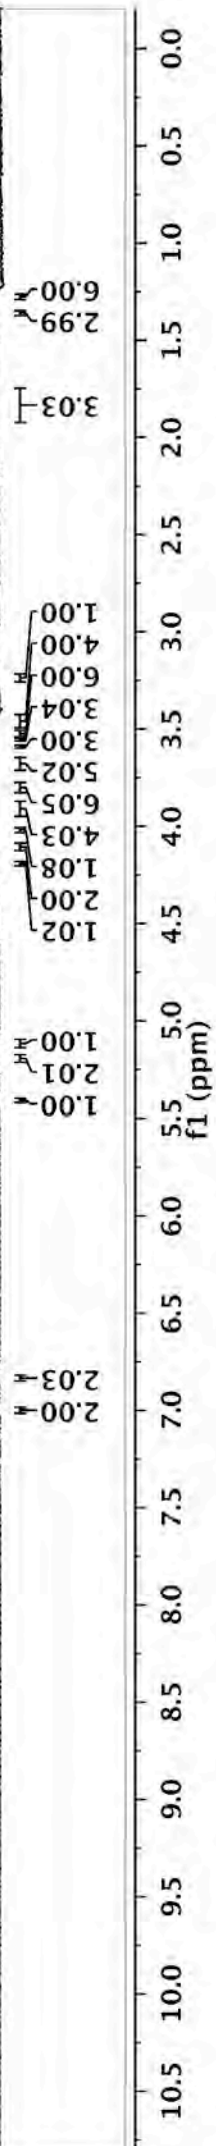





<sup>1</sup>H NMR of compound 23

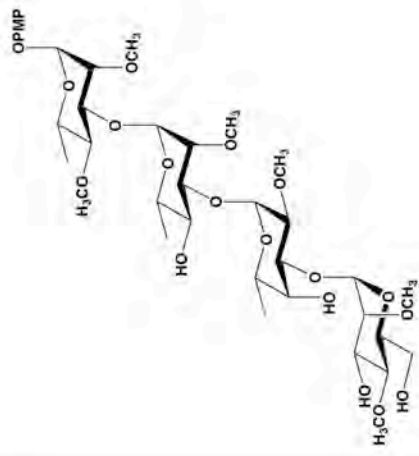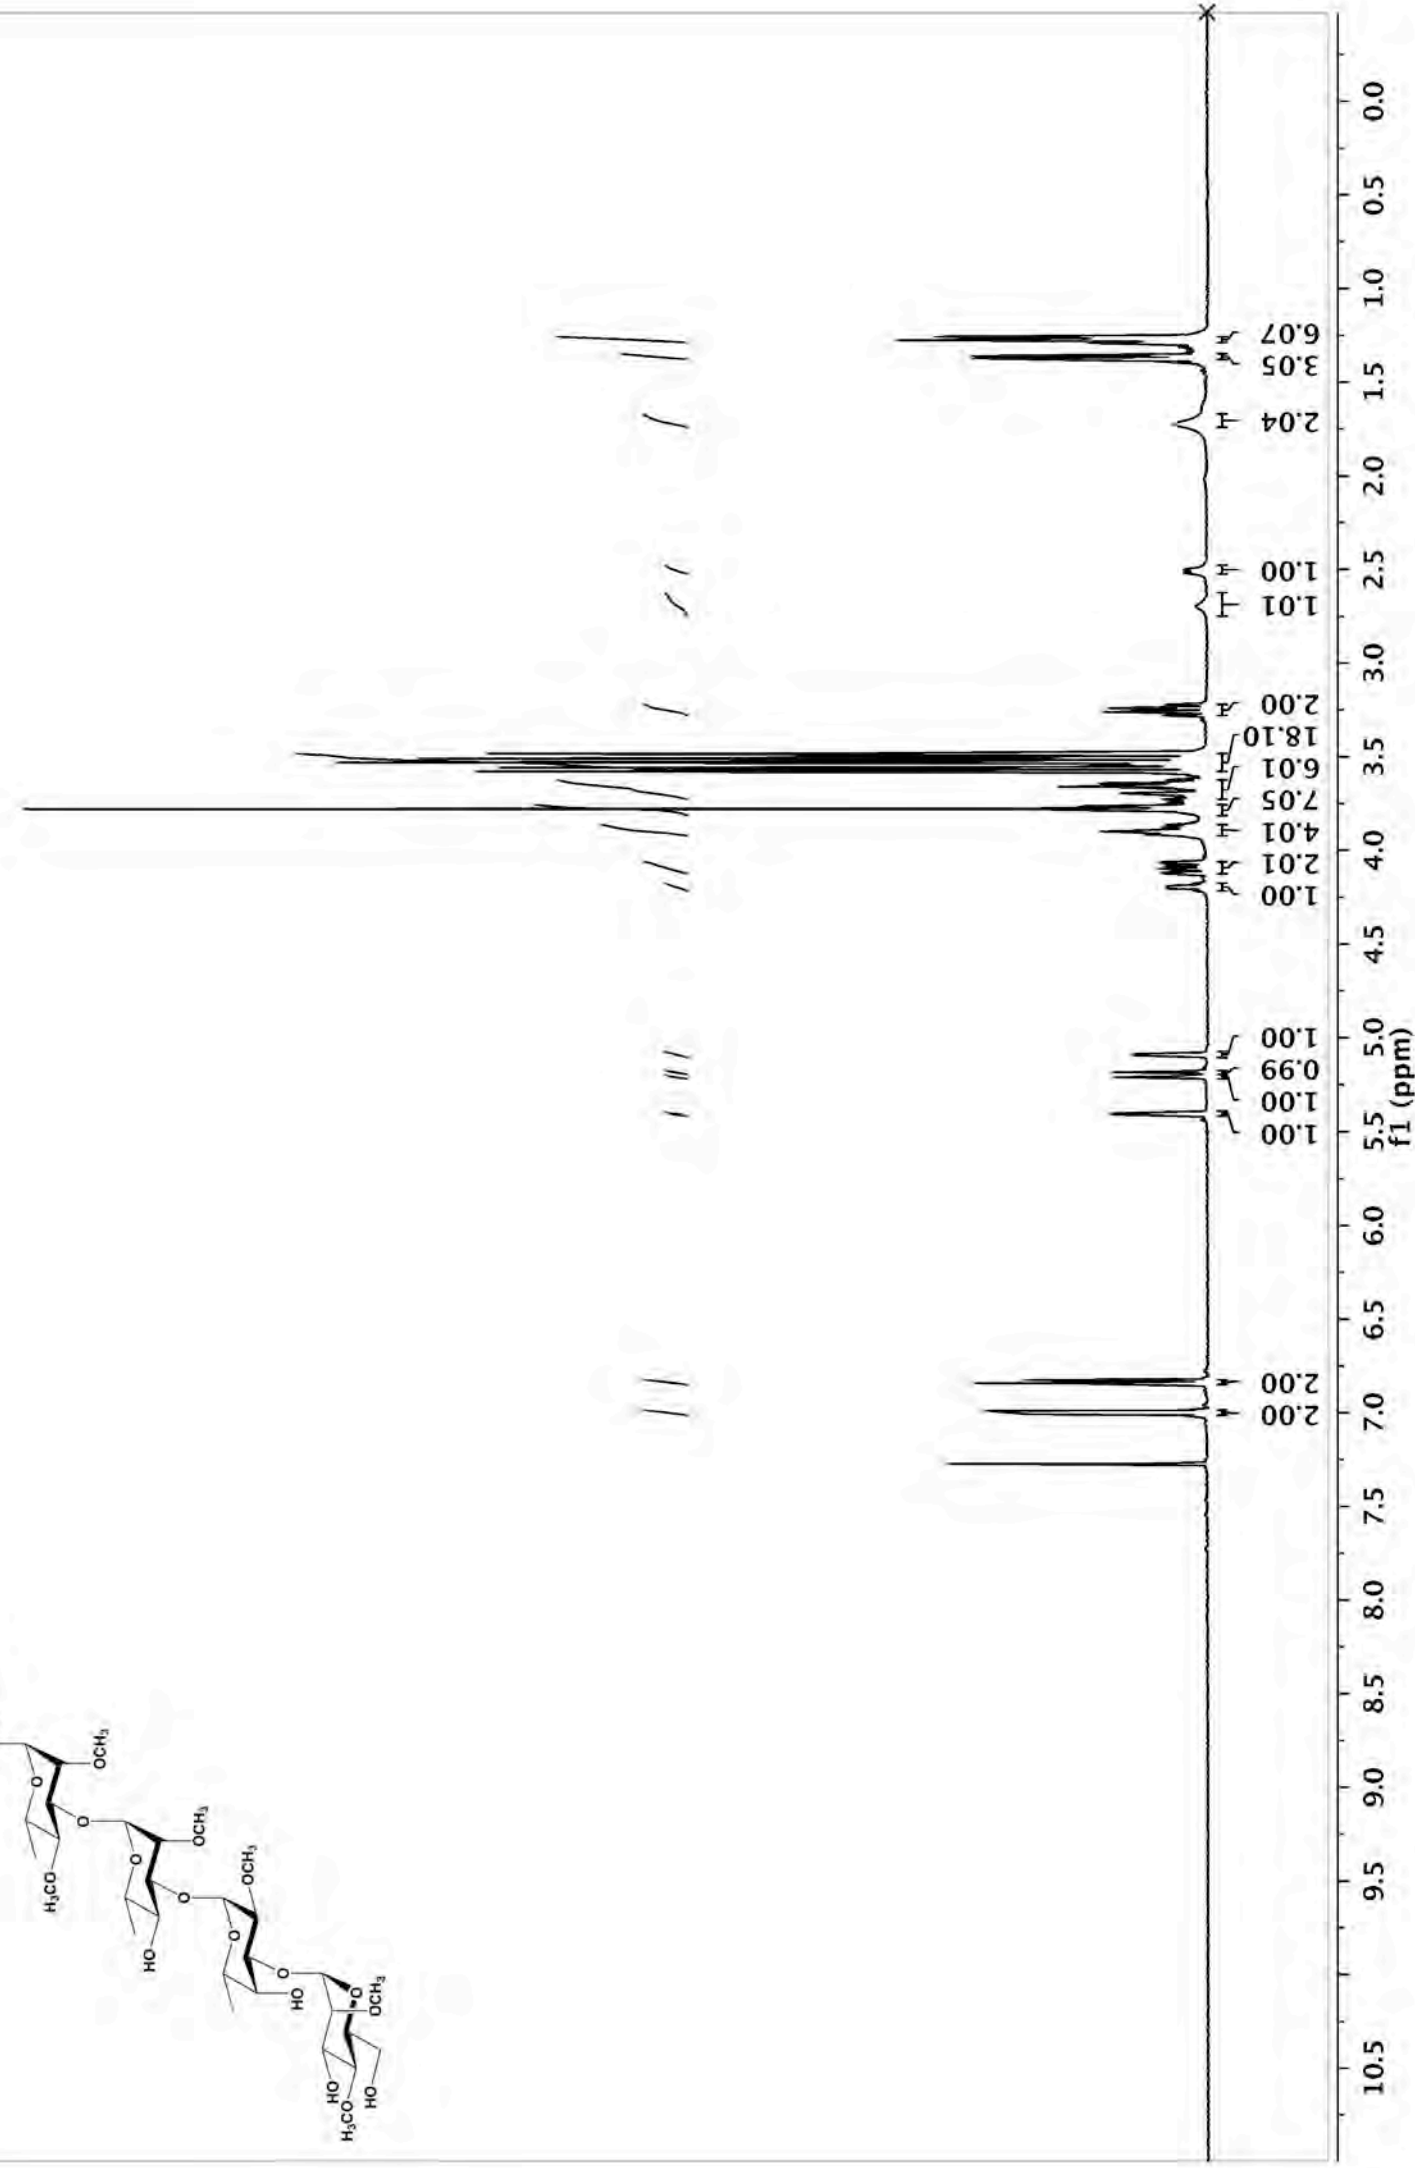

<sup>13</sup>C NMR of compound 24

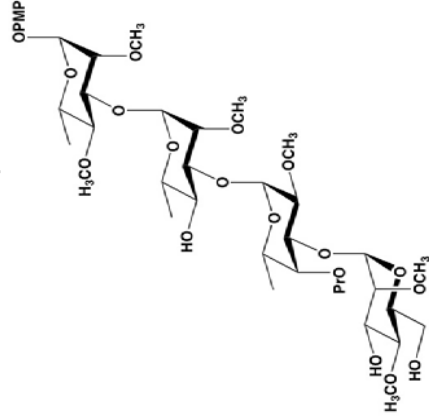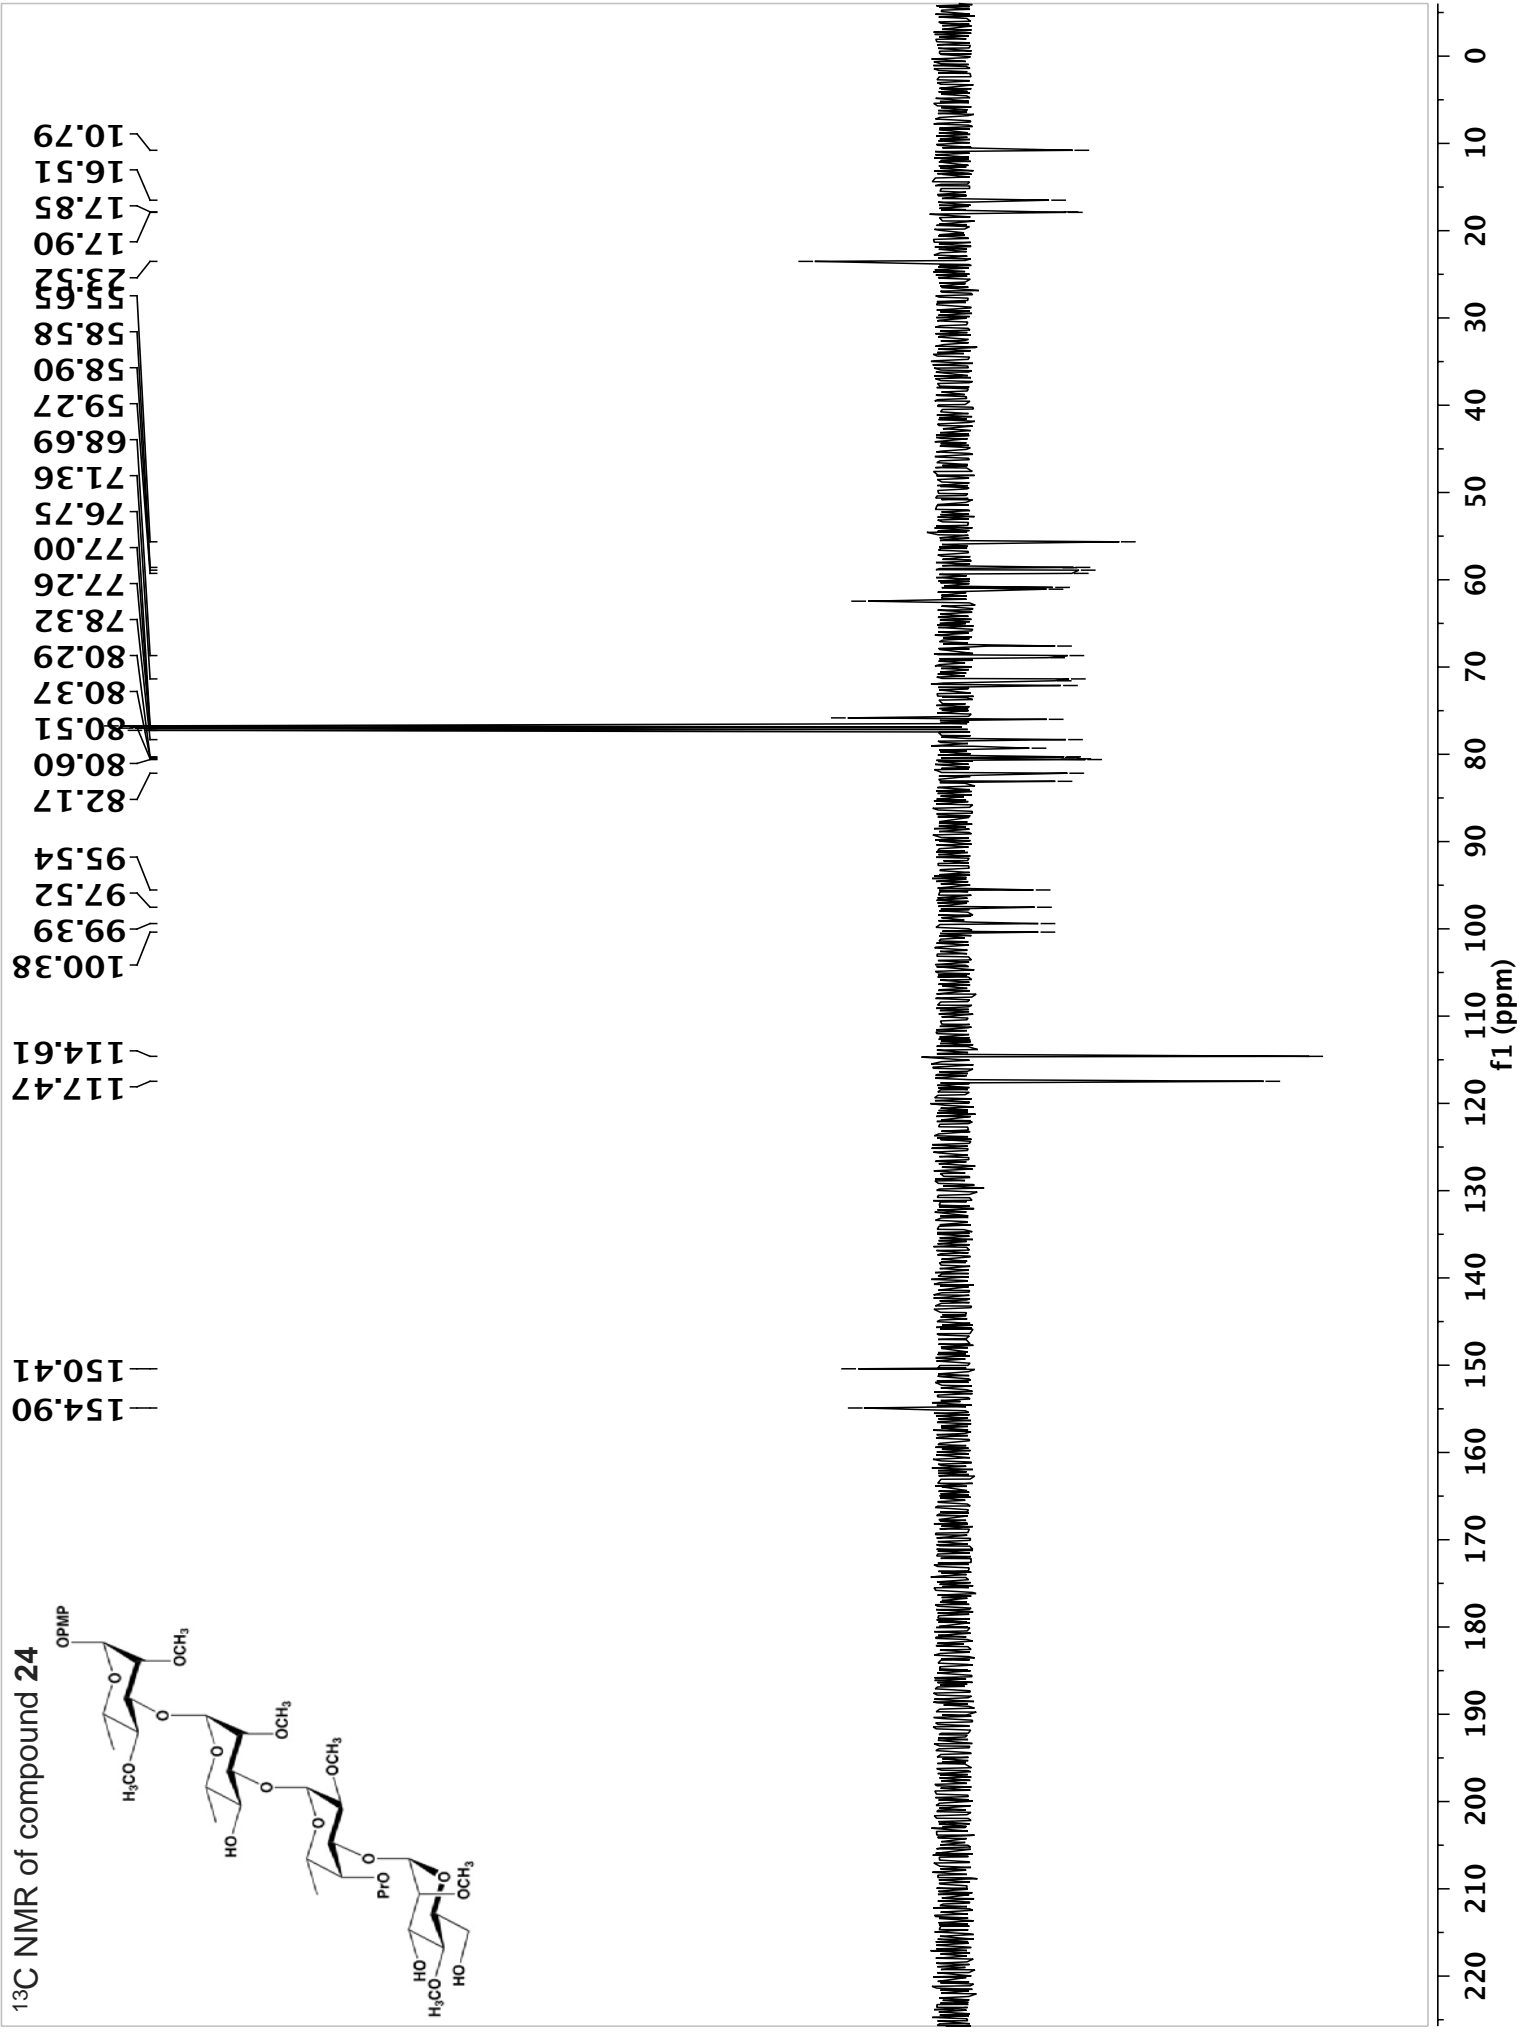



<sup>13</sup>C NMR of compound 34

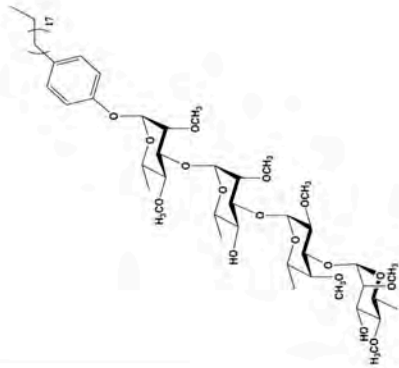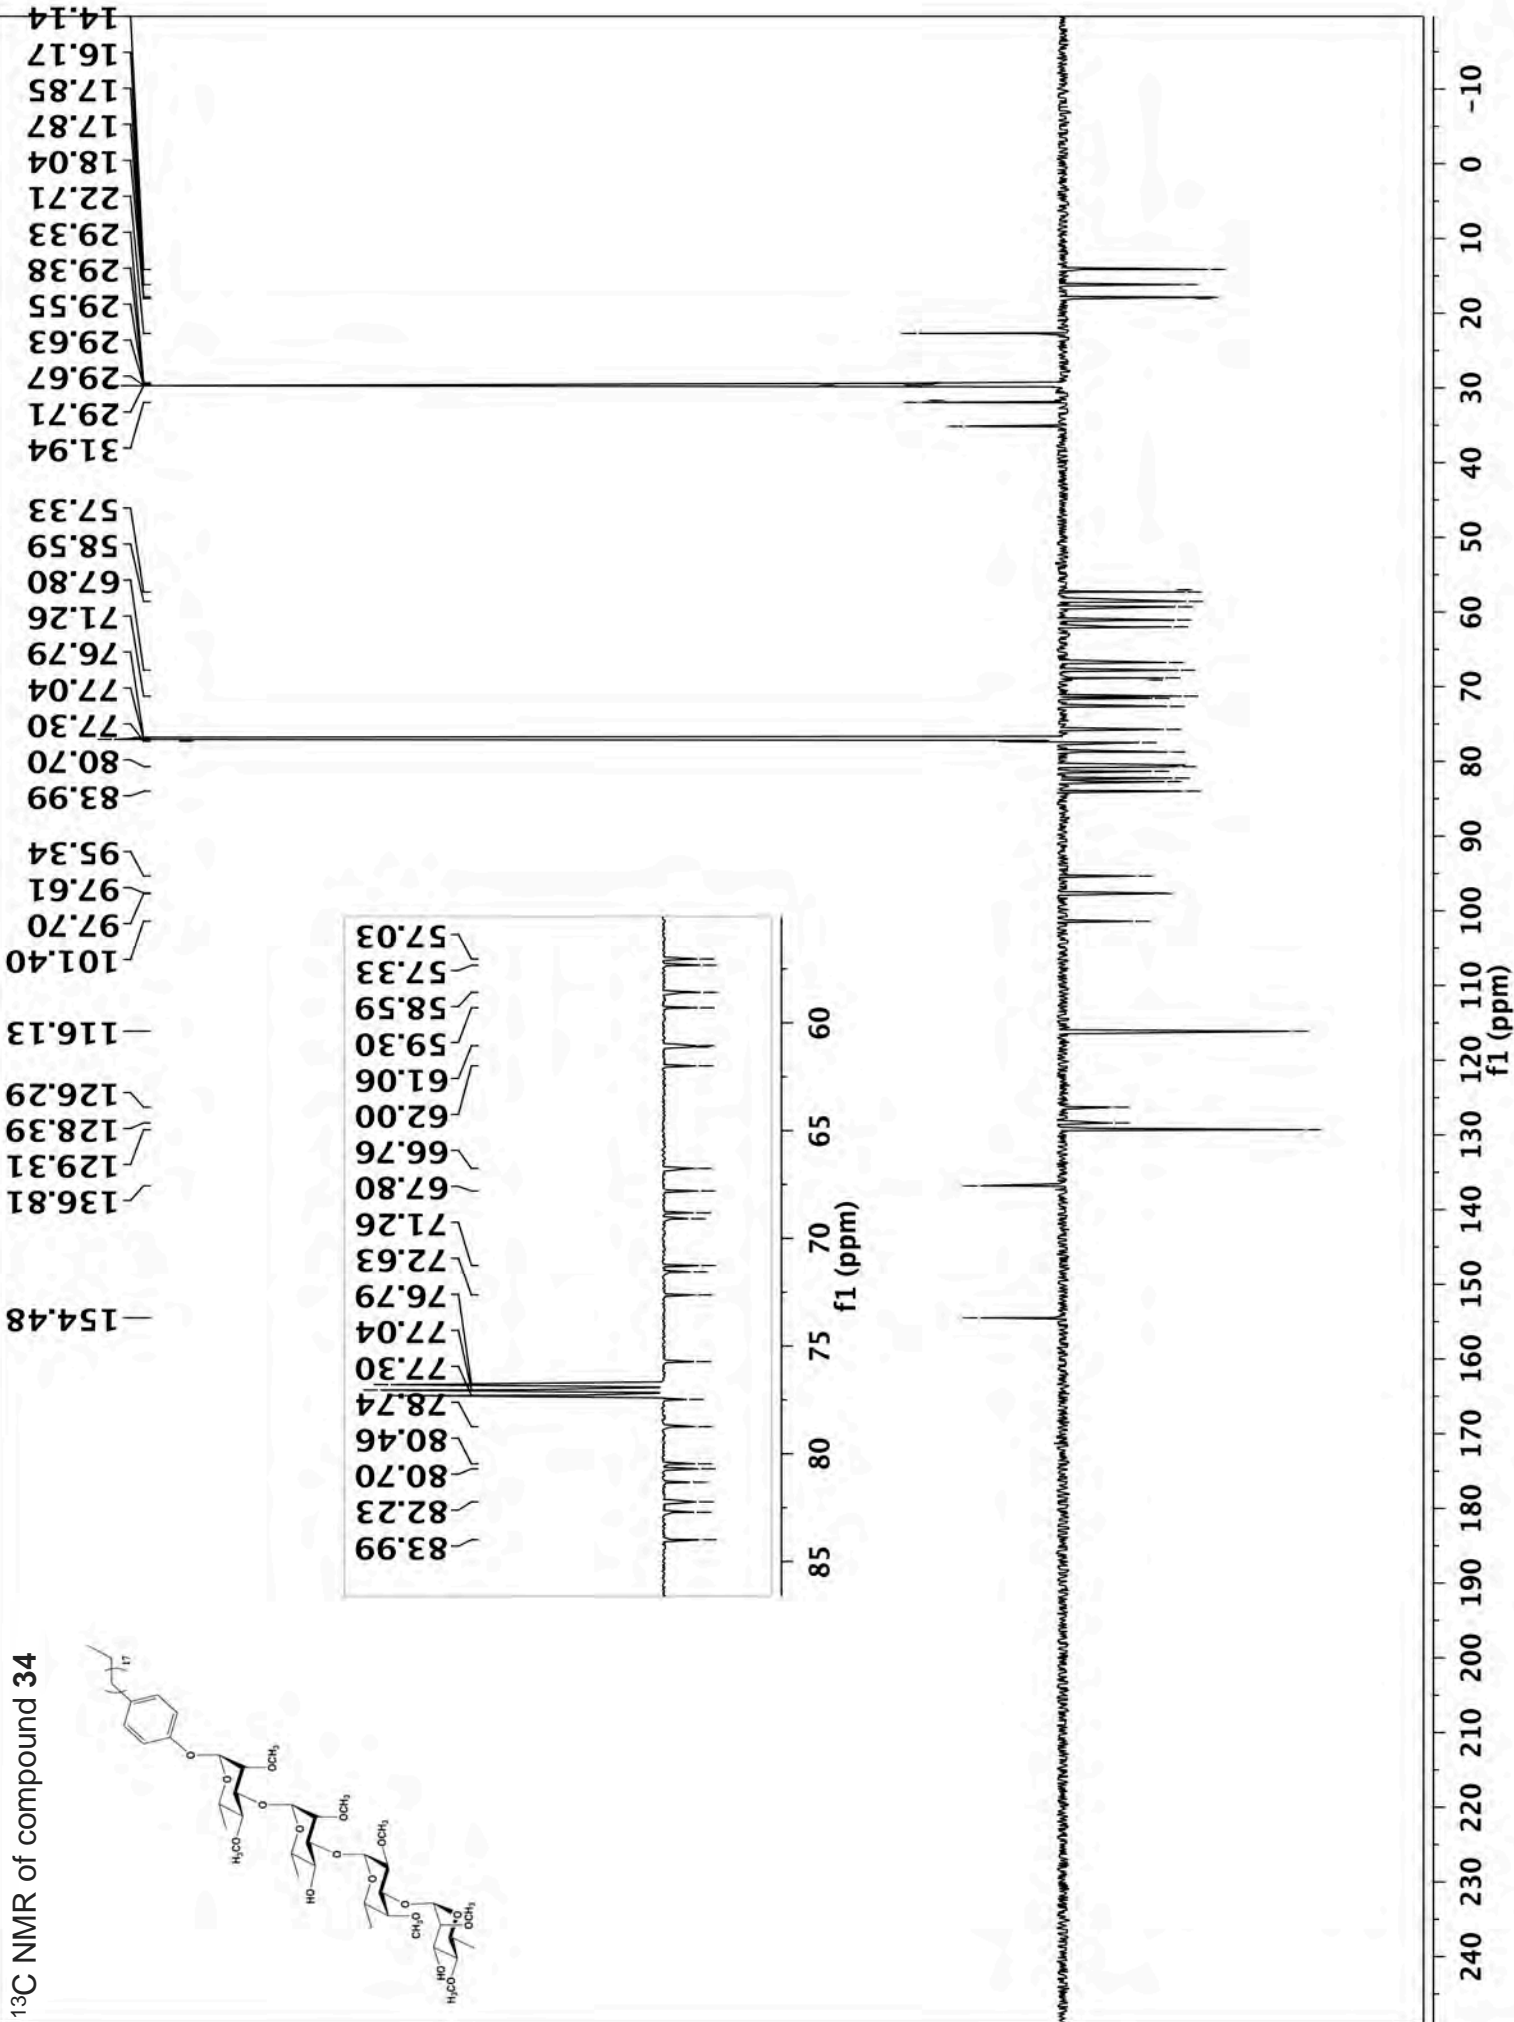



<sup>13</sup>C NMR of compound S1

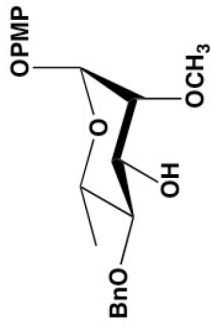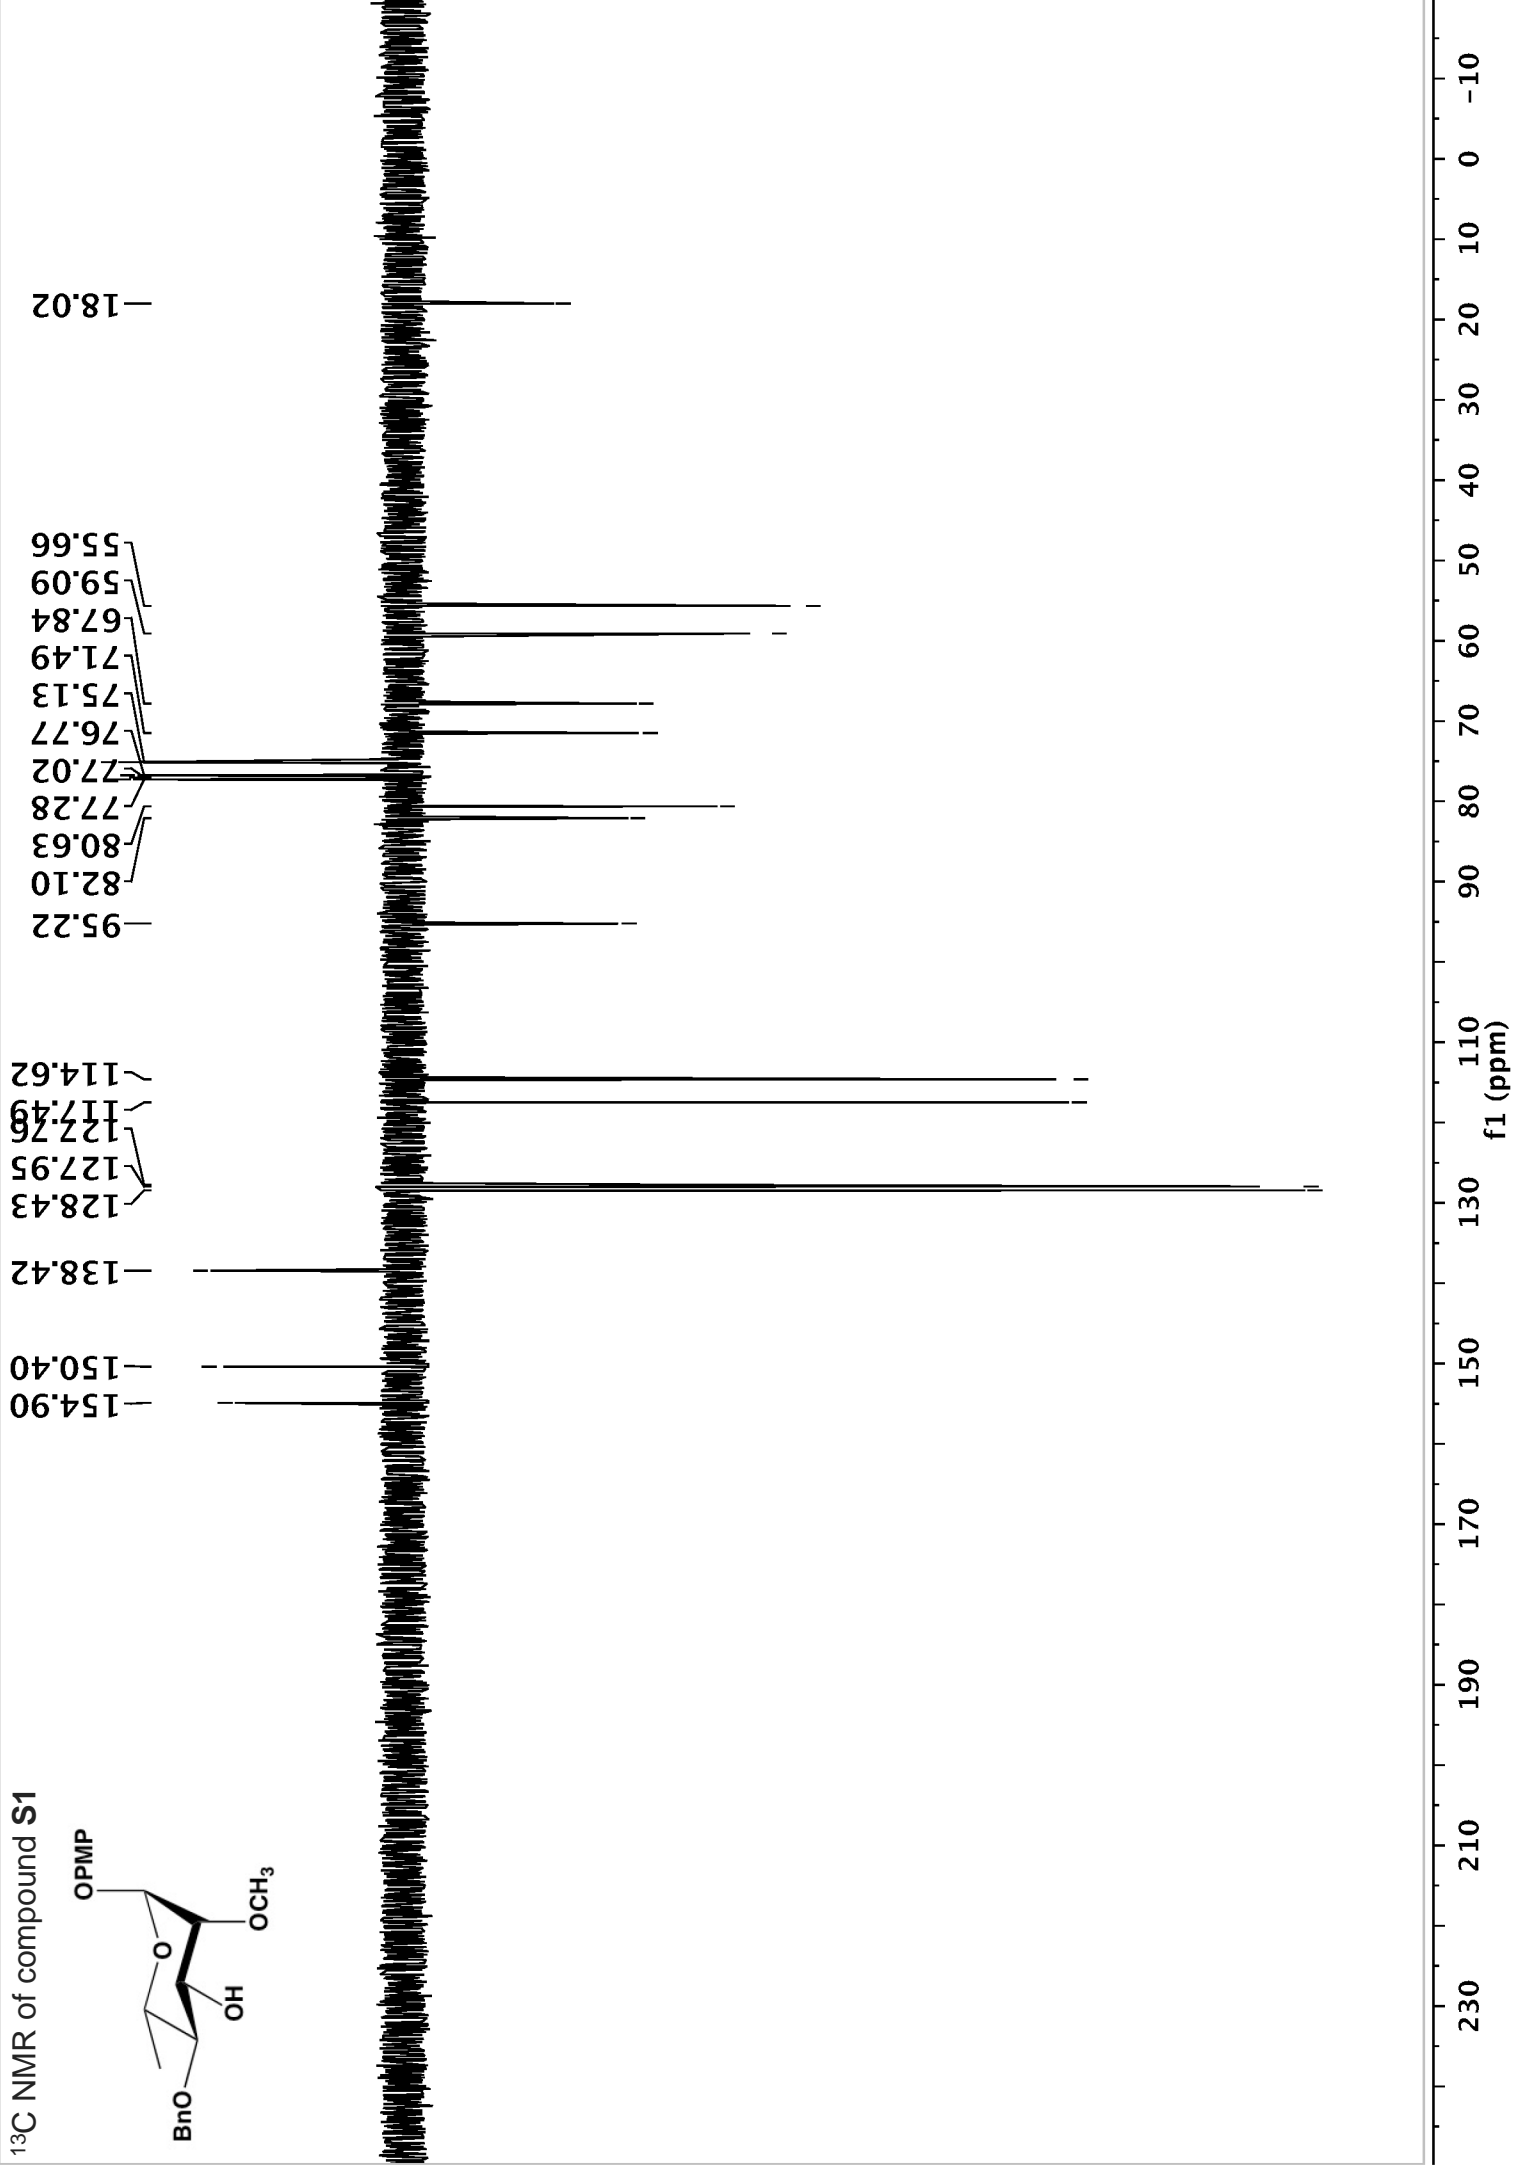

<sup>1</sup>H NMR of compound S1

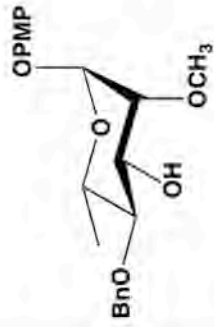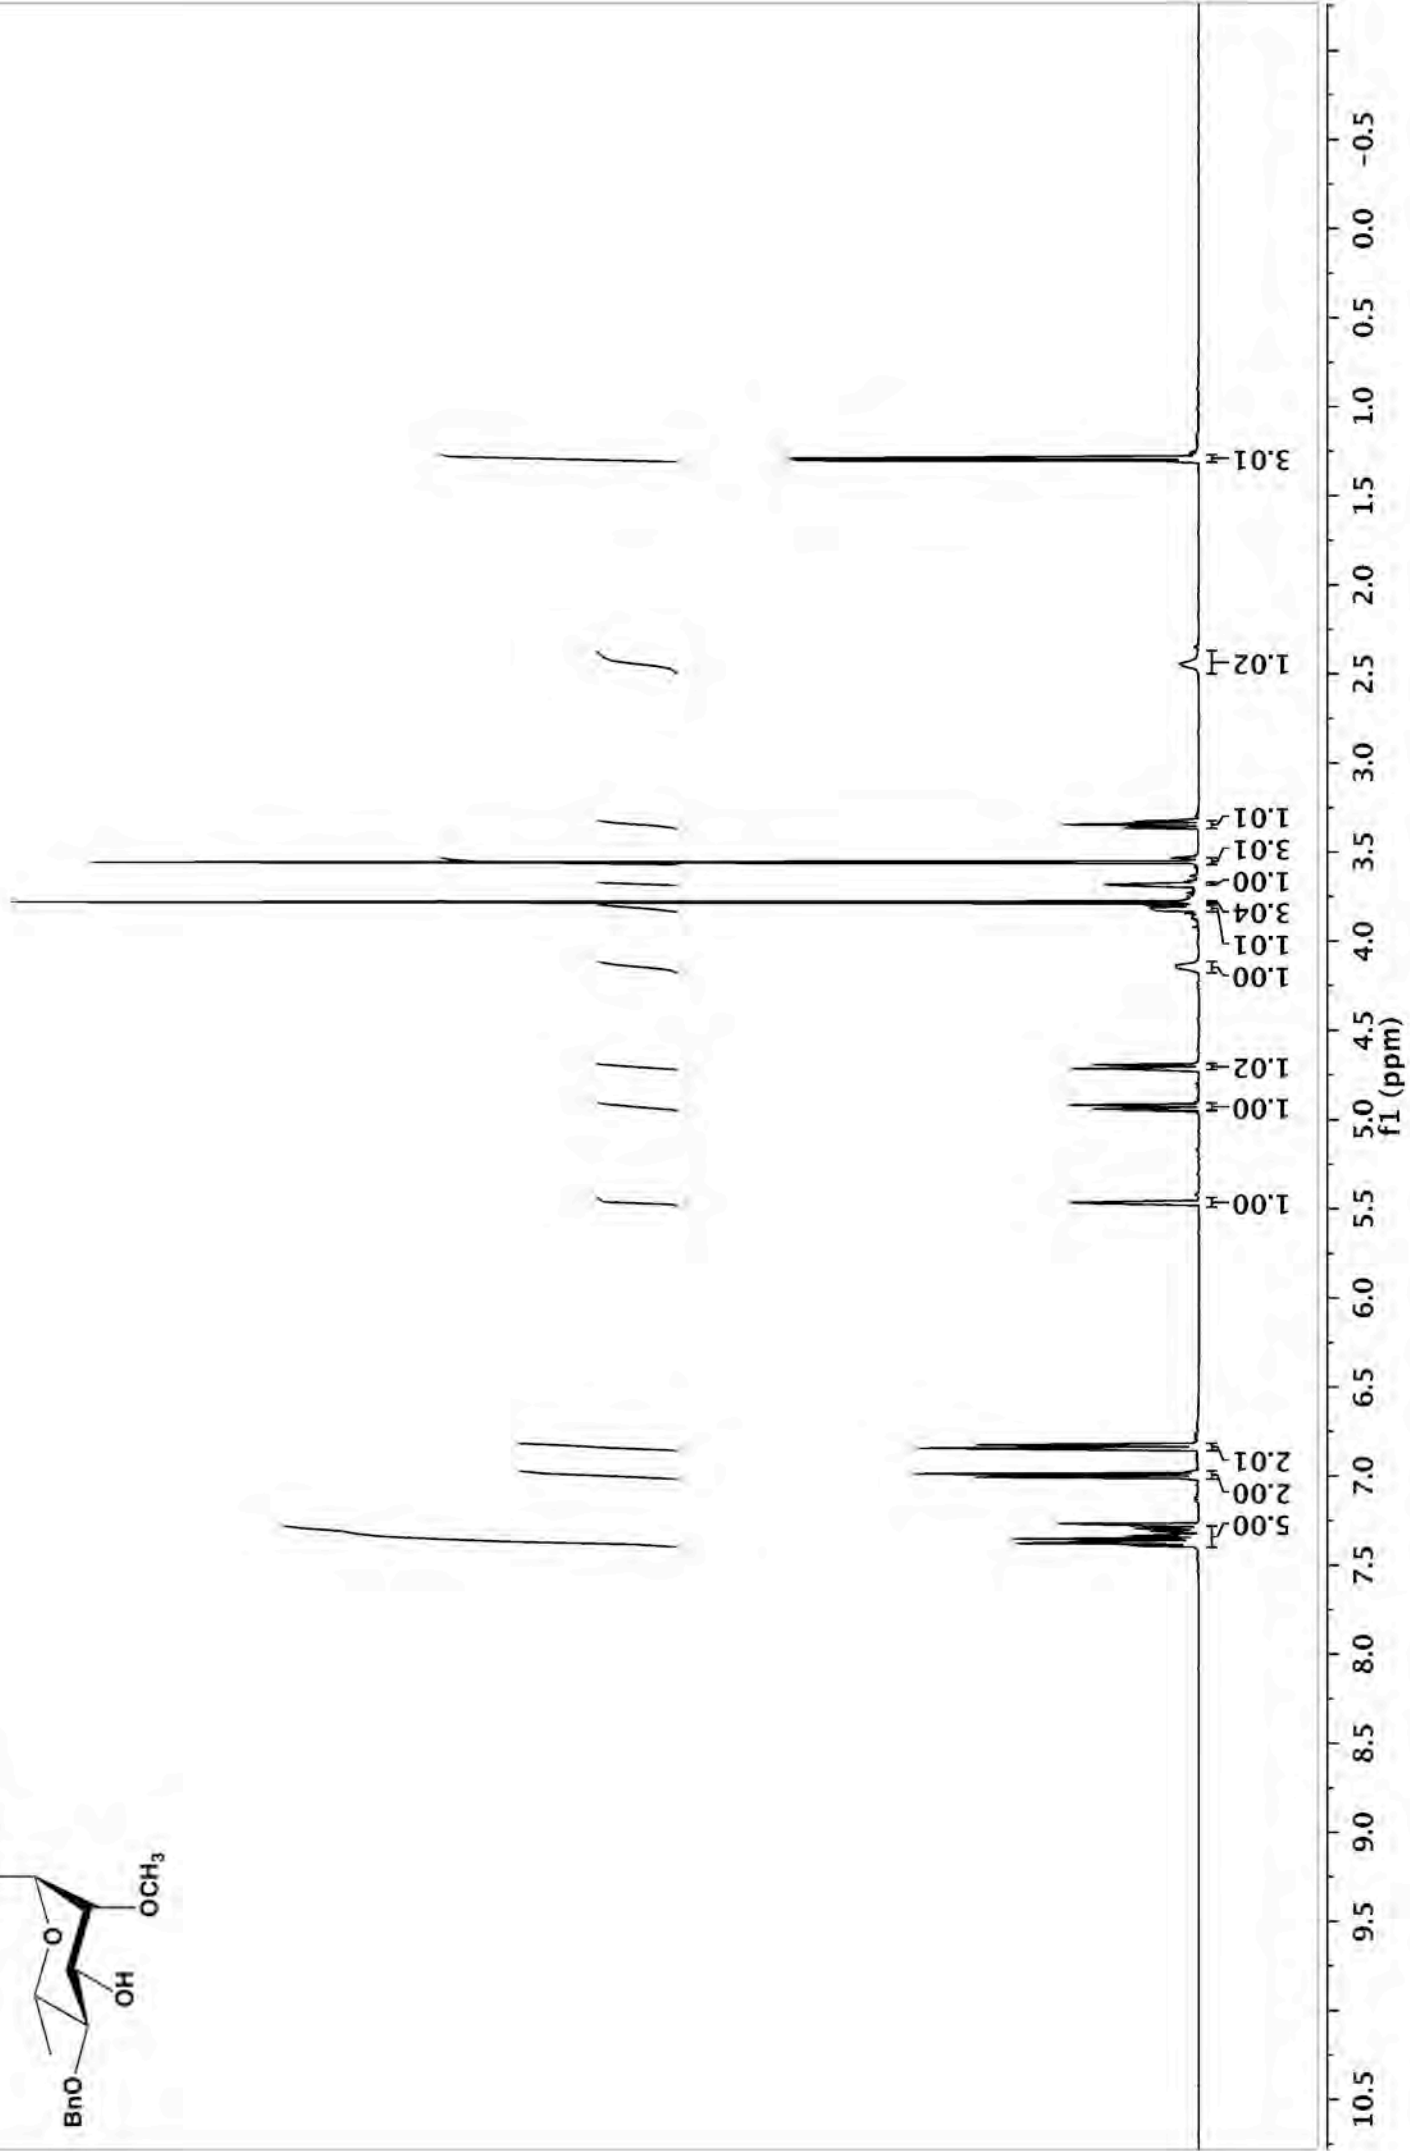

<sup>13</sup>C NMR of compound S2

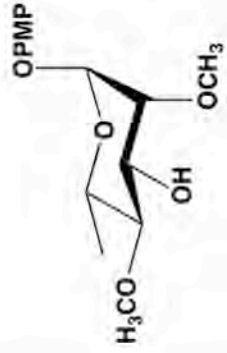

155.16  
150.69  
117.75  
114.86  
95.52  
83.97  
80.77  
77.56  
77.25  
76.93  
71.42  
68.15  
61.16  
59.30  
55.91  
18.16

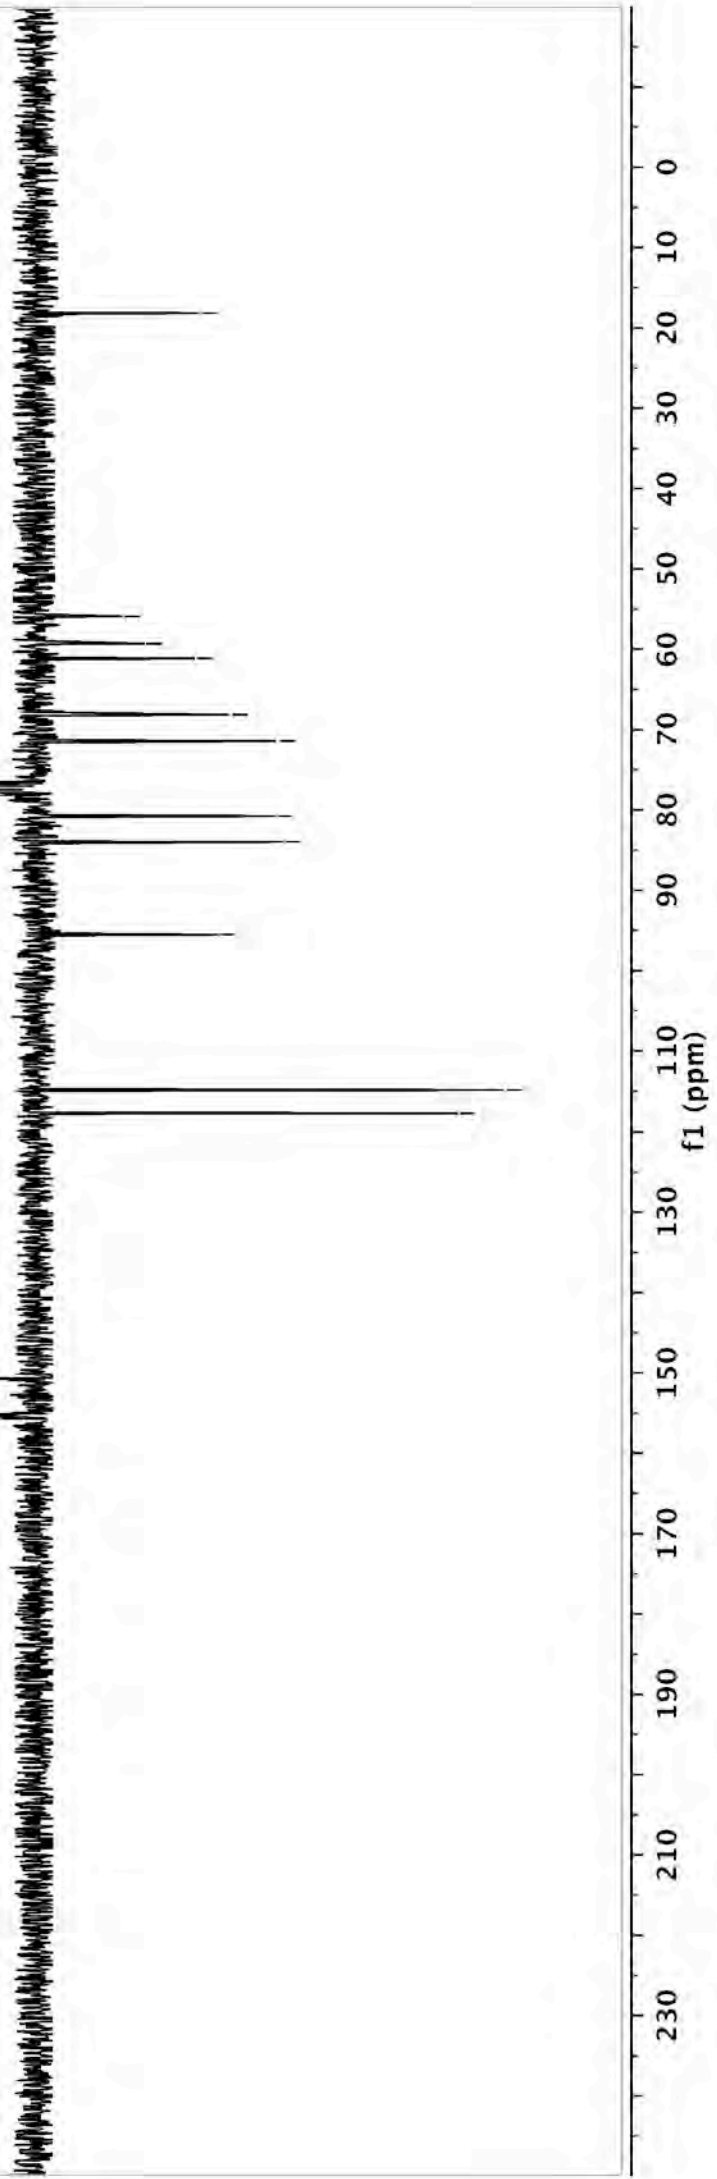



<sup>1</sup>H NMR of compound S2

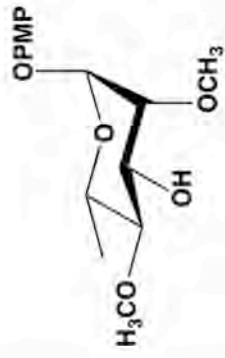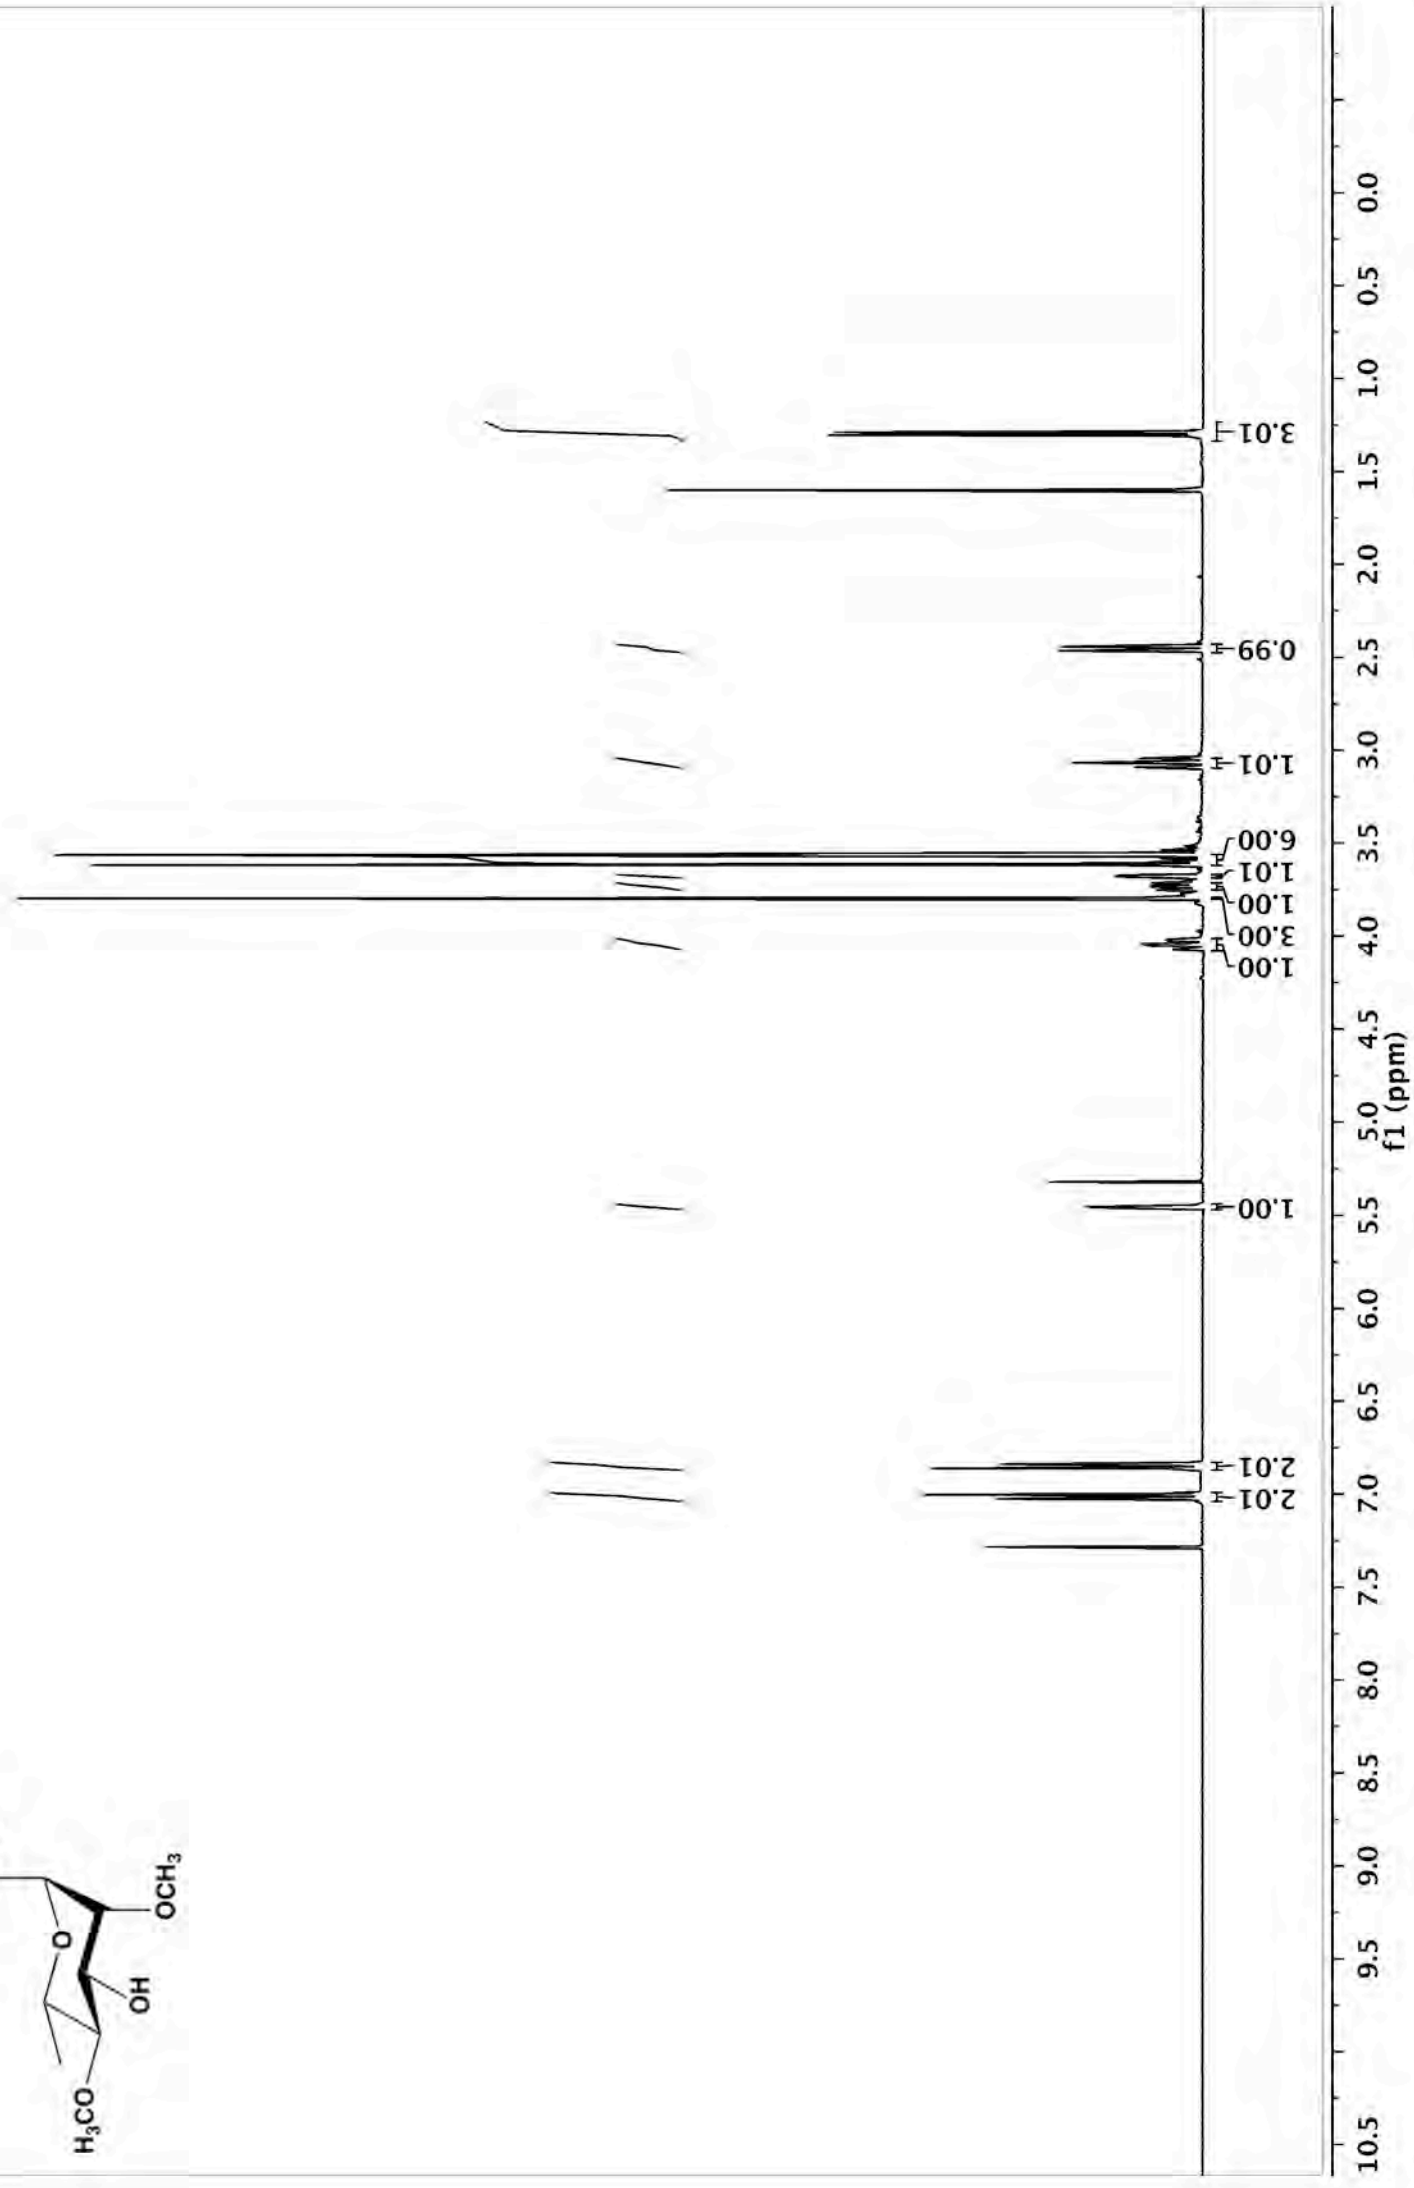

<sup>13</sup>C NMR of compound S3

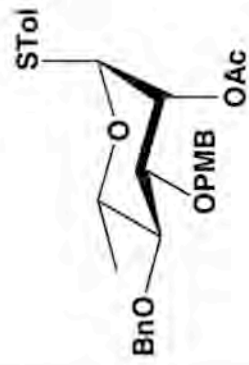

170.51  
159.62  
138.70  
138.13  
132.55  
130.35  
130.10  
128.62  
128.16  
127.94  
114.11  
86.75  
80.42  
78.12  
77.58  
77.27  
76.95  
75.66  
71.72  
70.90  
69.27  
55.51  
21.36  
18.11

f1 (ppm)

230 210 190 170 150 130 110 90 70 50 30 10 0

<sup>1</sup>H NMR of compound S3

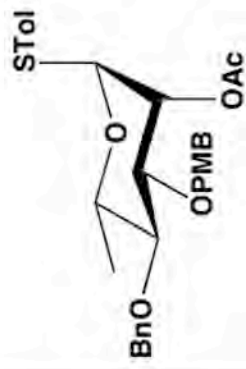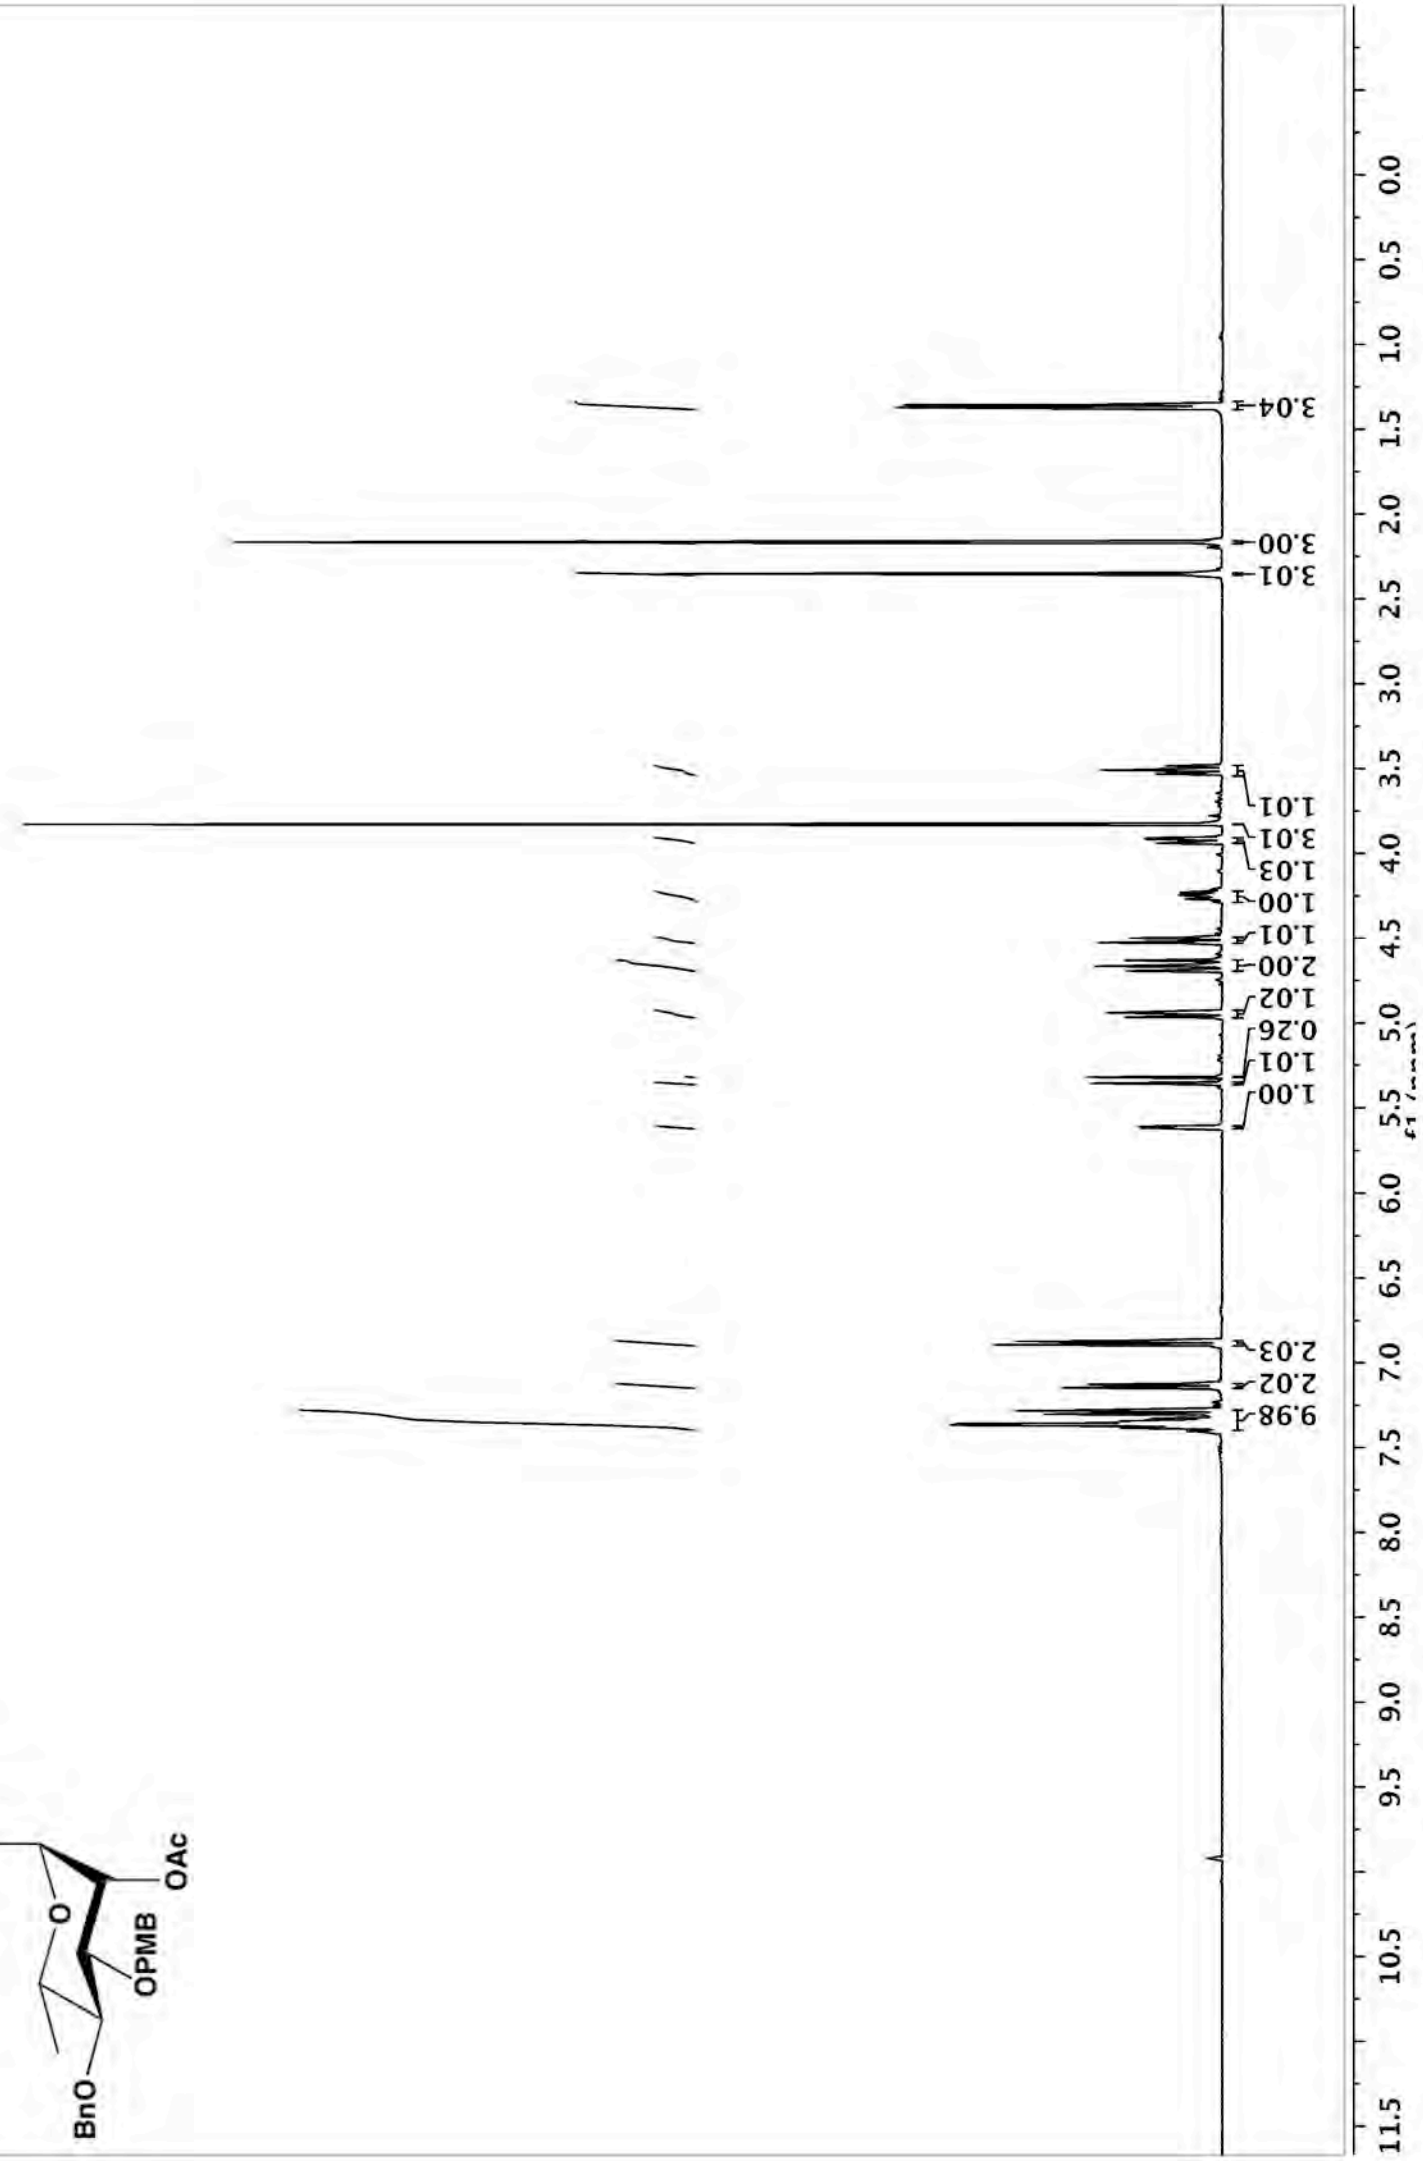

<sup>13</sup>C NMR of compound 25

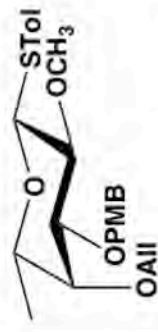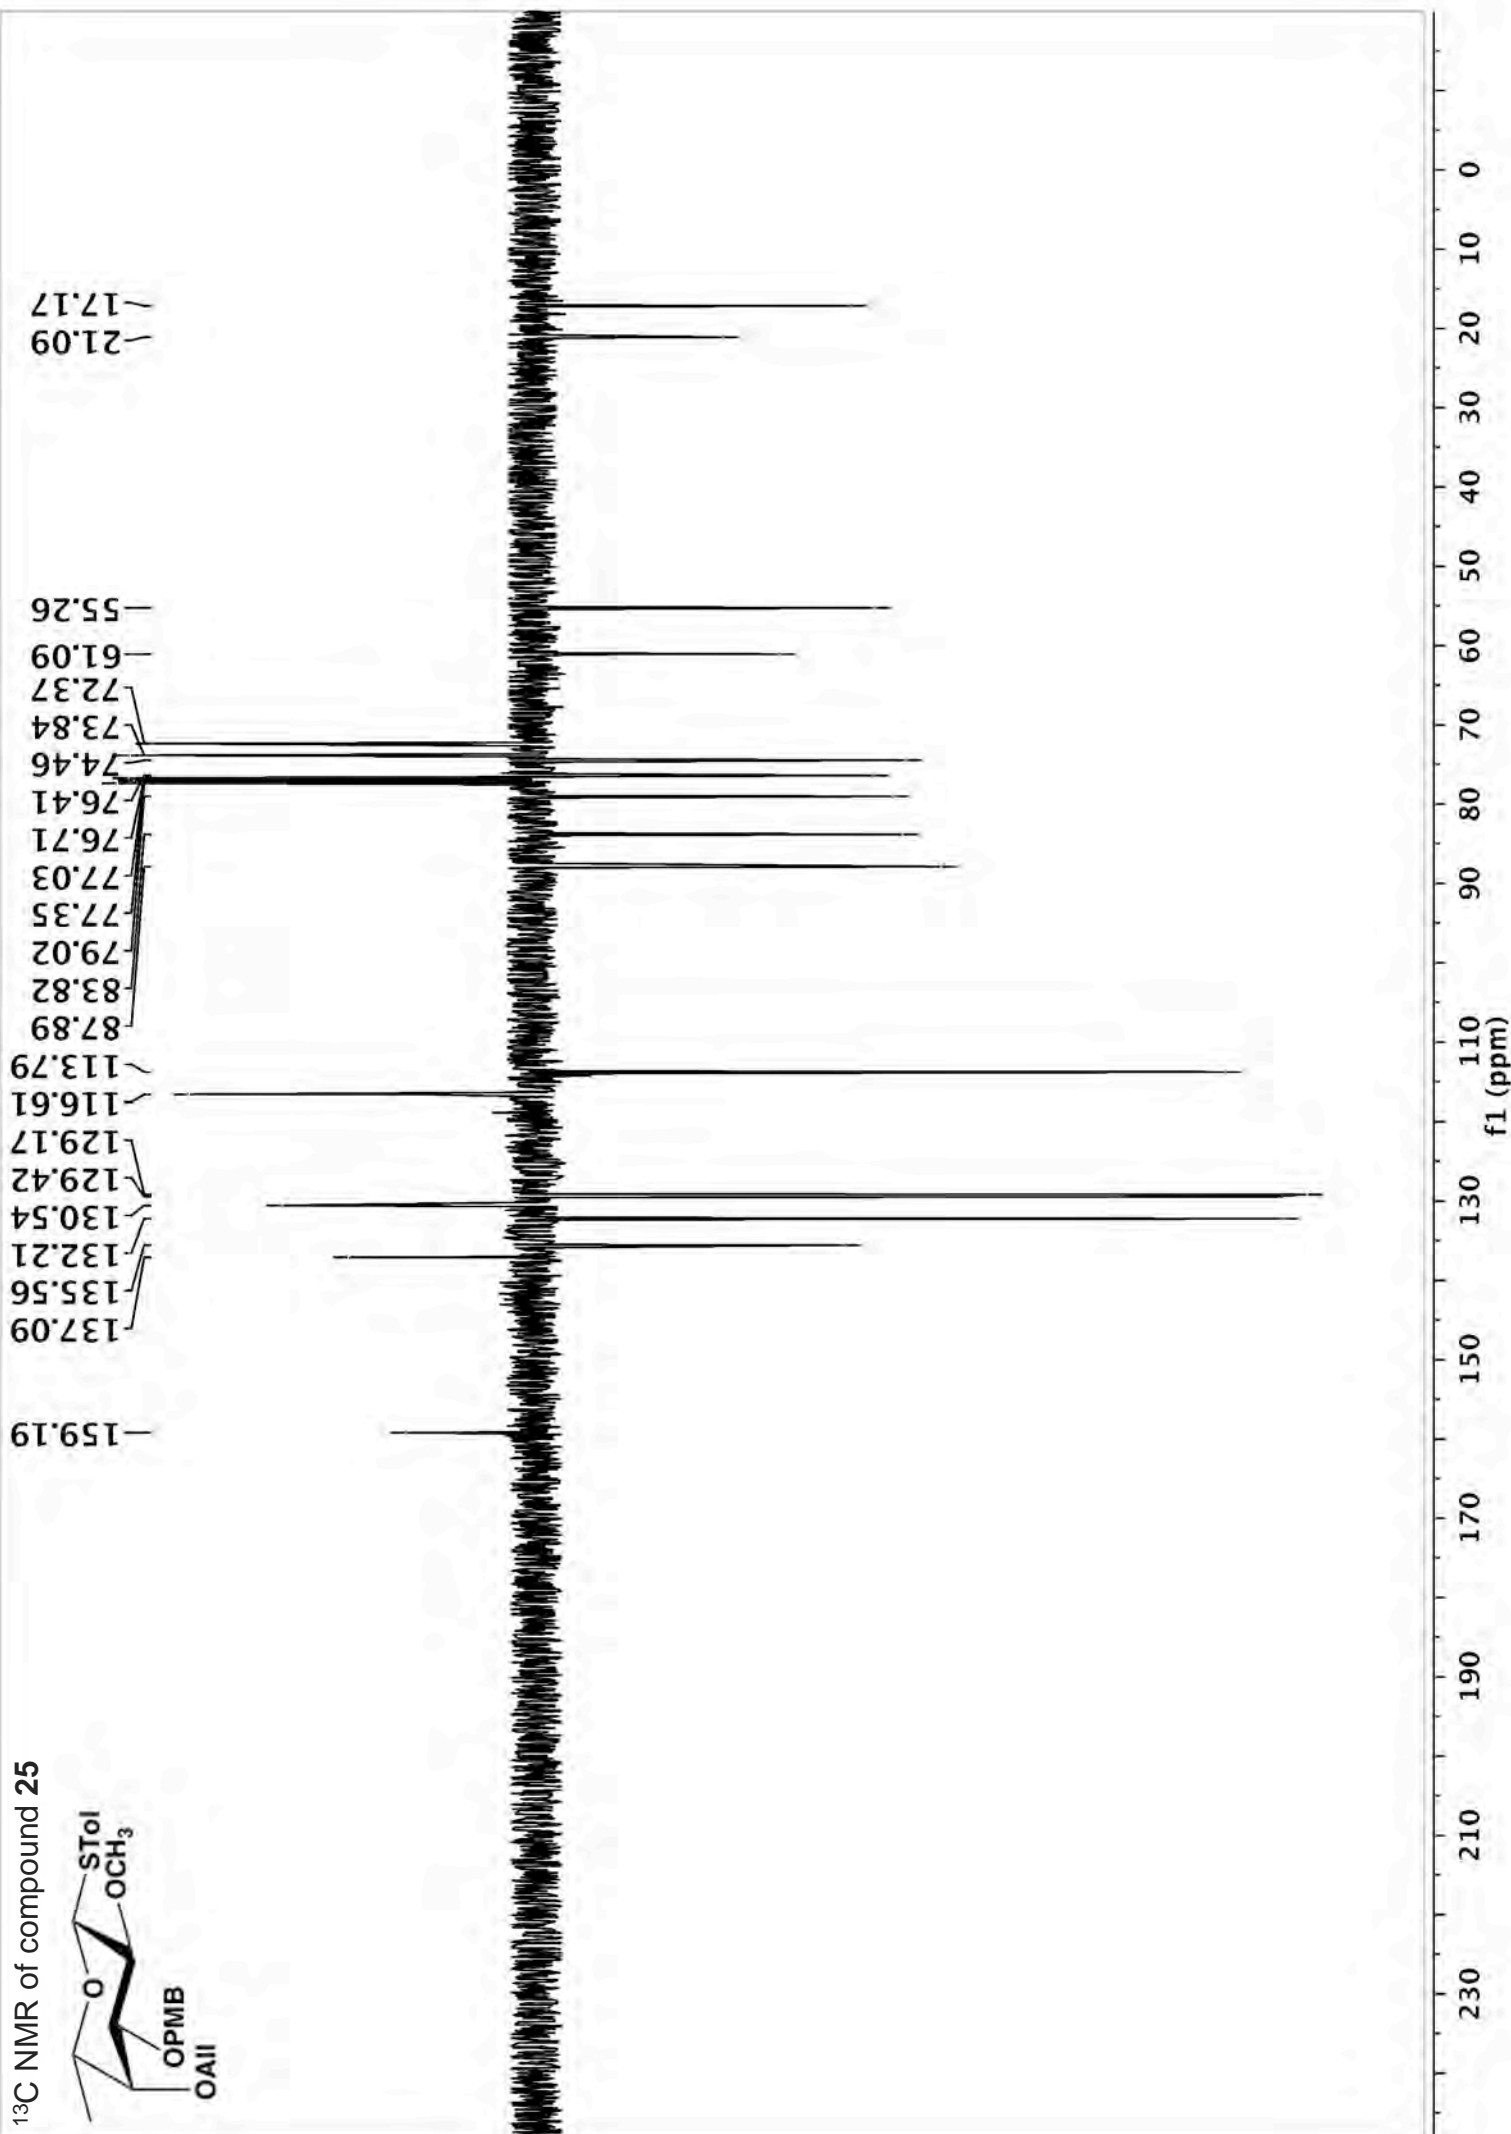

<sup>1</sup>H NMR of compound 25

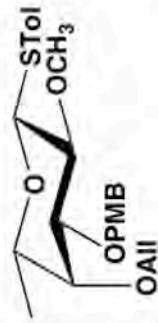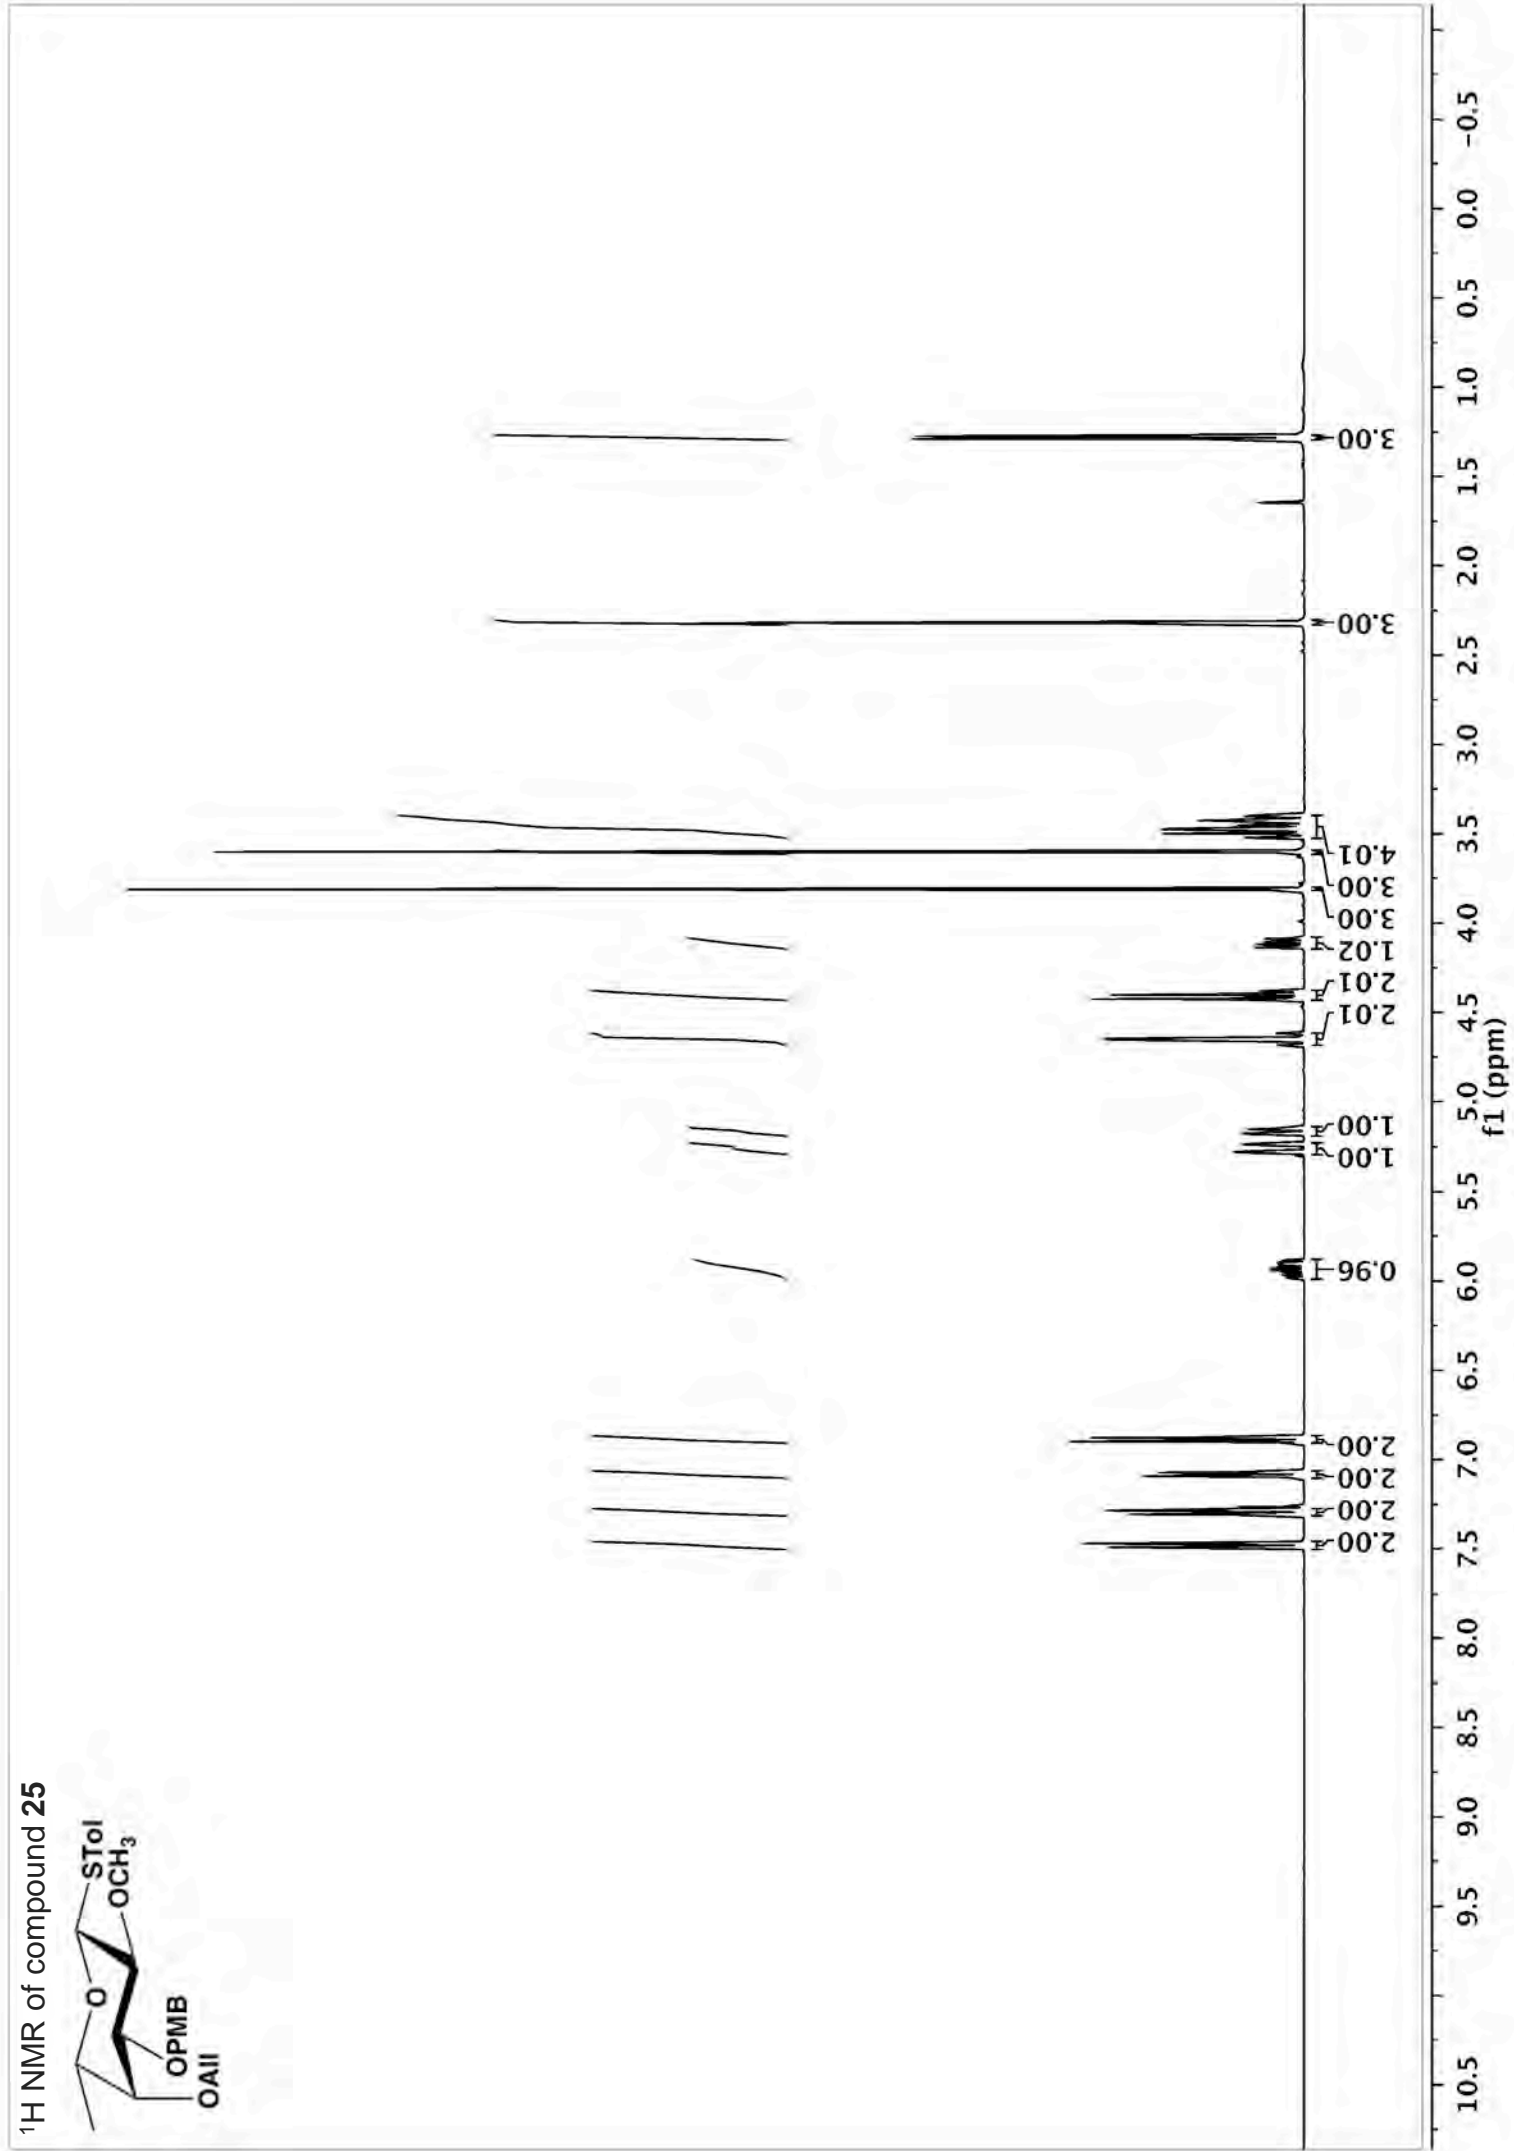

<sup>13</sup>C NMR of compound 26

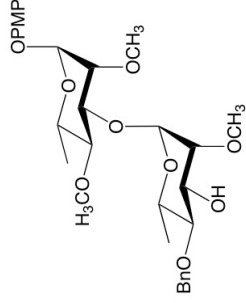

154.9285  
150.4358  
138.5412  
138.3703  
128.4343  
128.0122  
127.1200  
117.5496  
114.6419  
98.6416  
95.8213  
80.9933  
80.3885  
77.3401  
77.0856  
76.8301  
55.1086  
55.0846  
58.5667  
55.6689  
18.1615  
18.0210

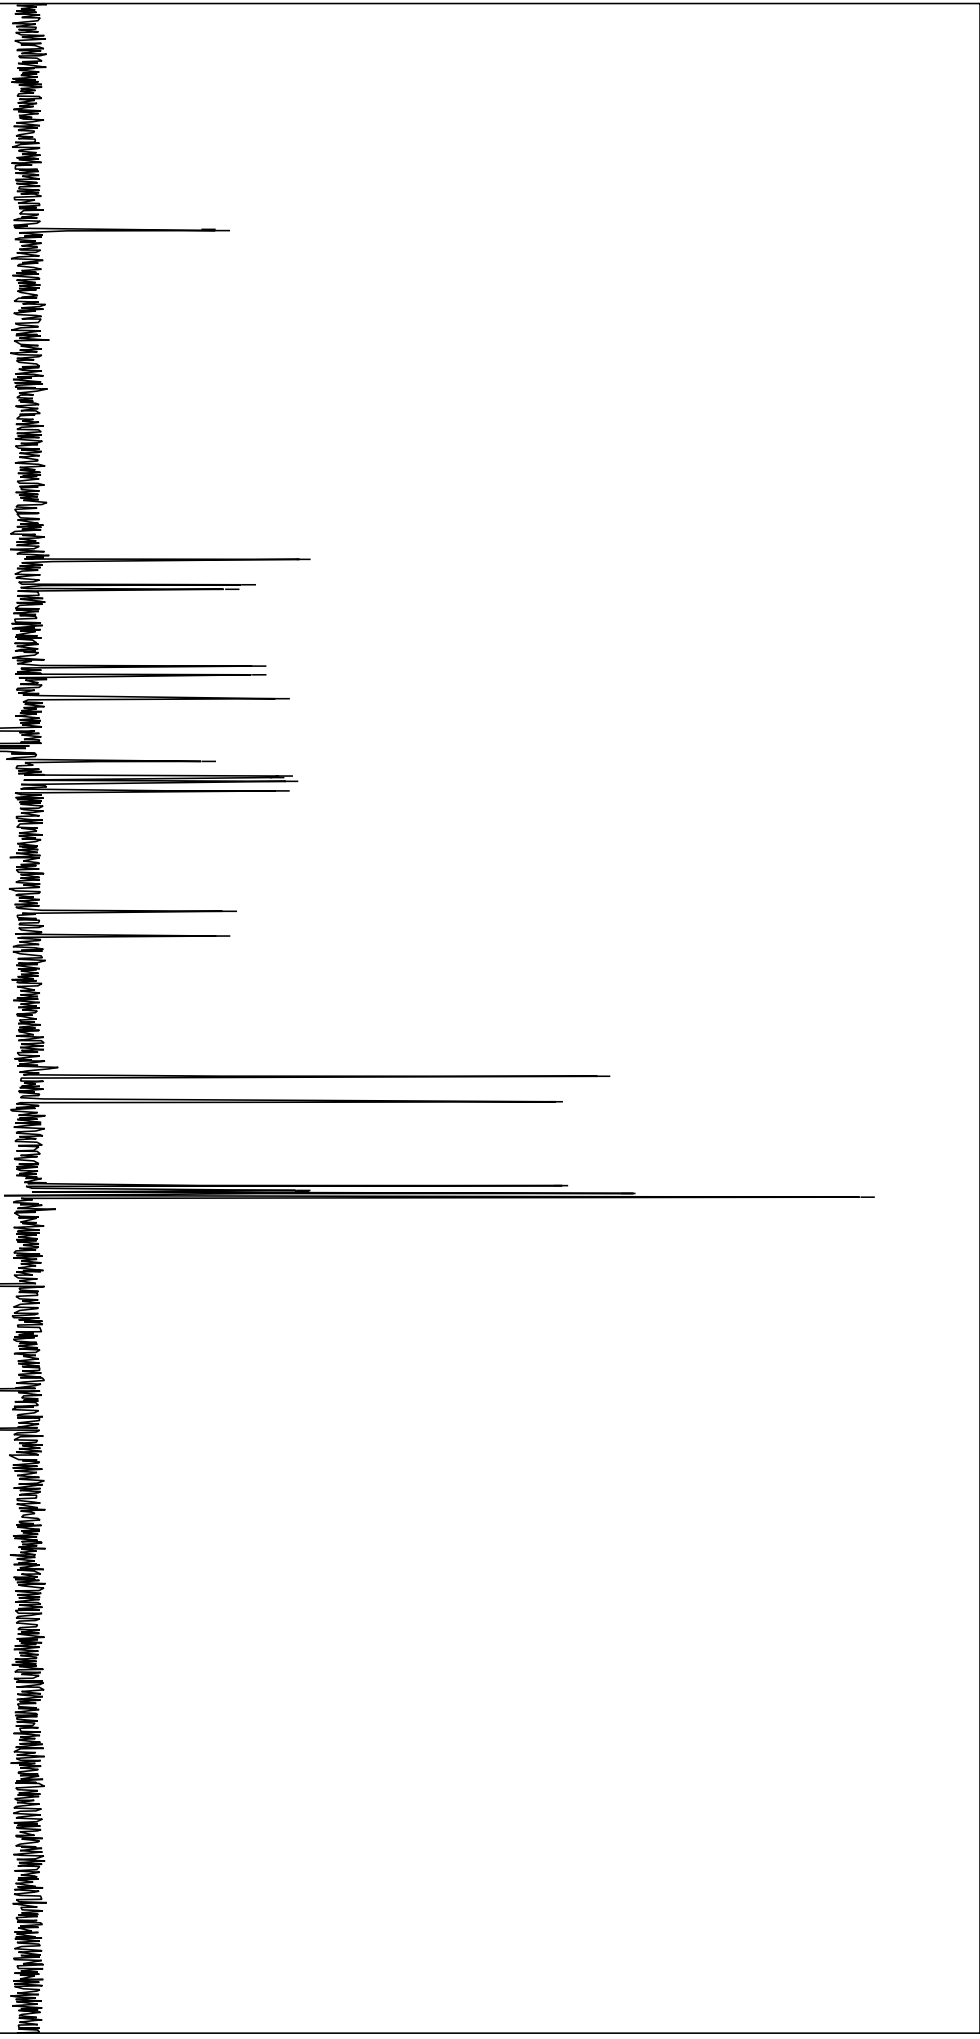

220 210 200 190 180 170 160 150 140 130 120 110 100 90 80 70 60 50 40 30 20 10 0

f1 (ppm)

<sup>1</sup>H NMR of compound 26

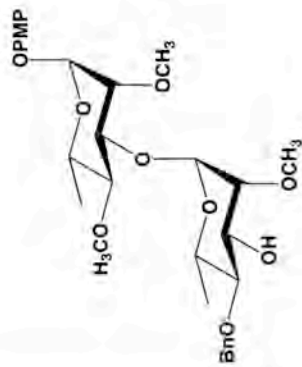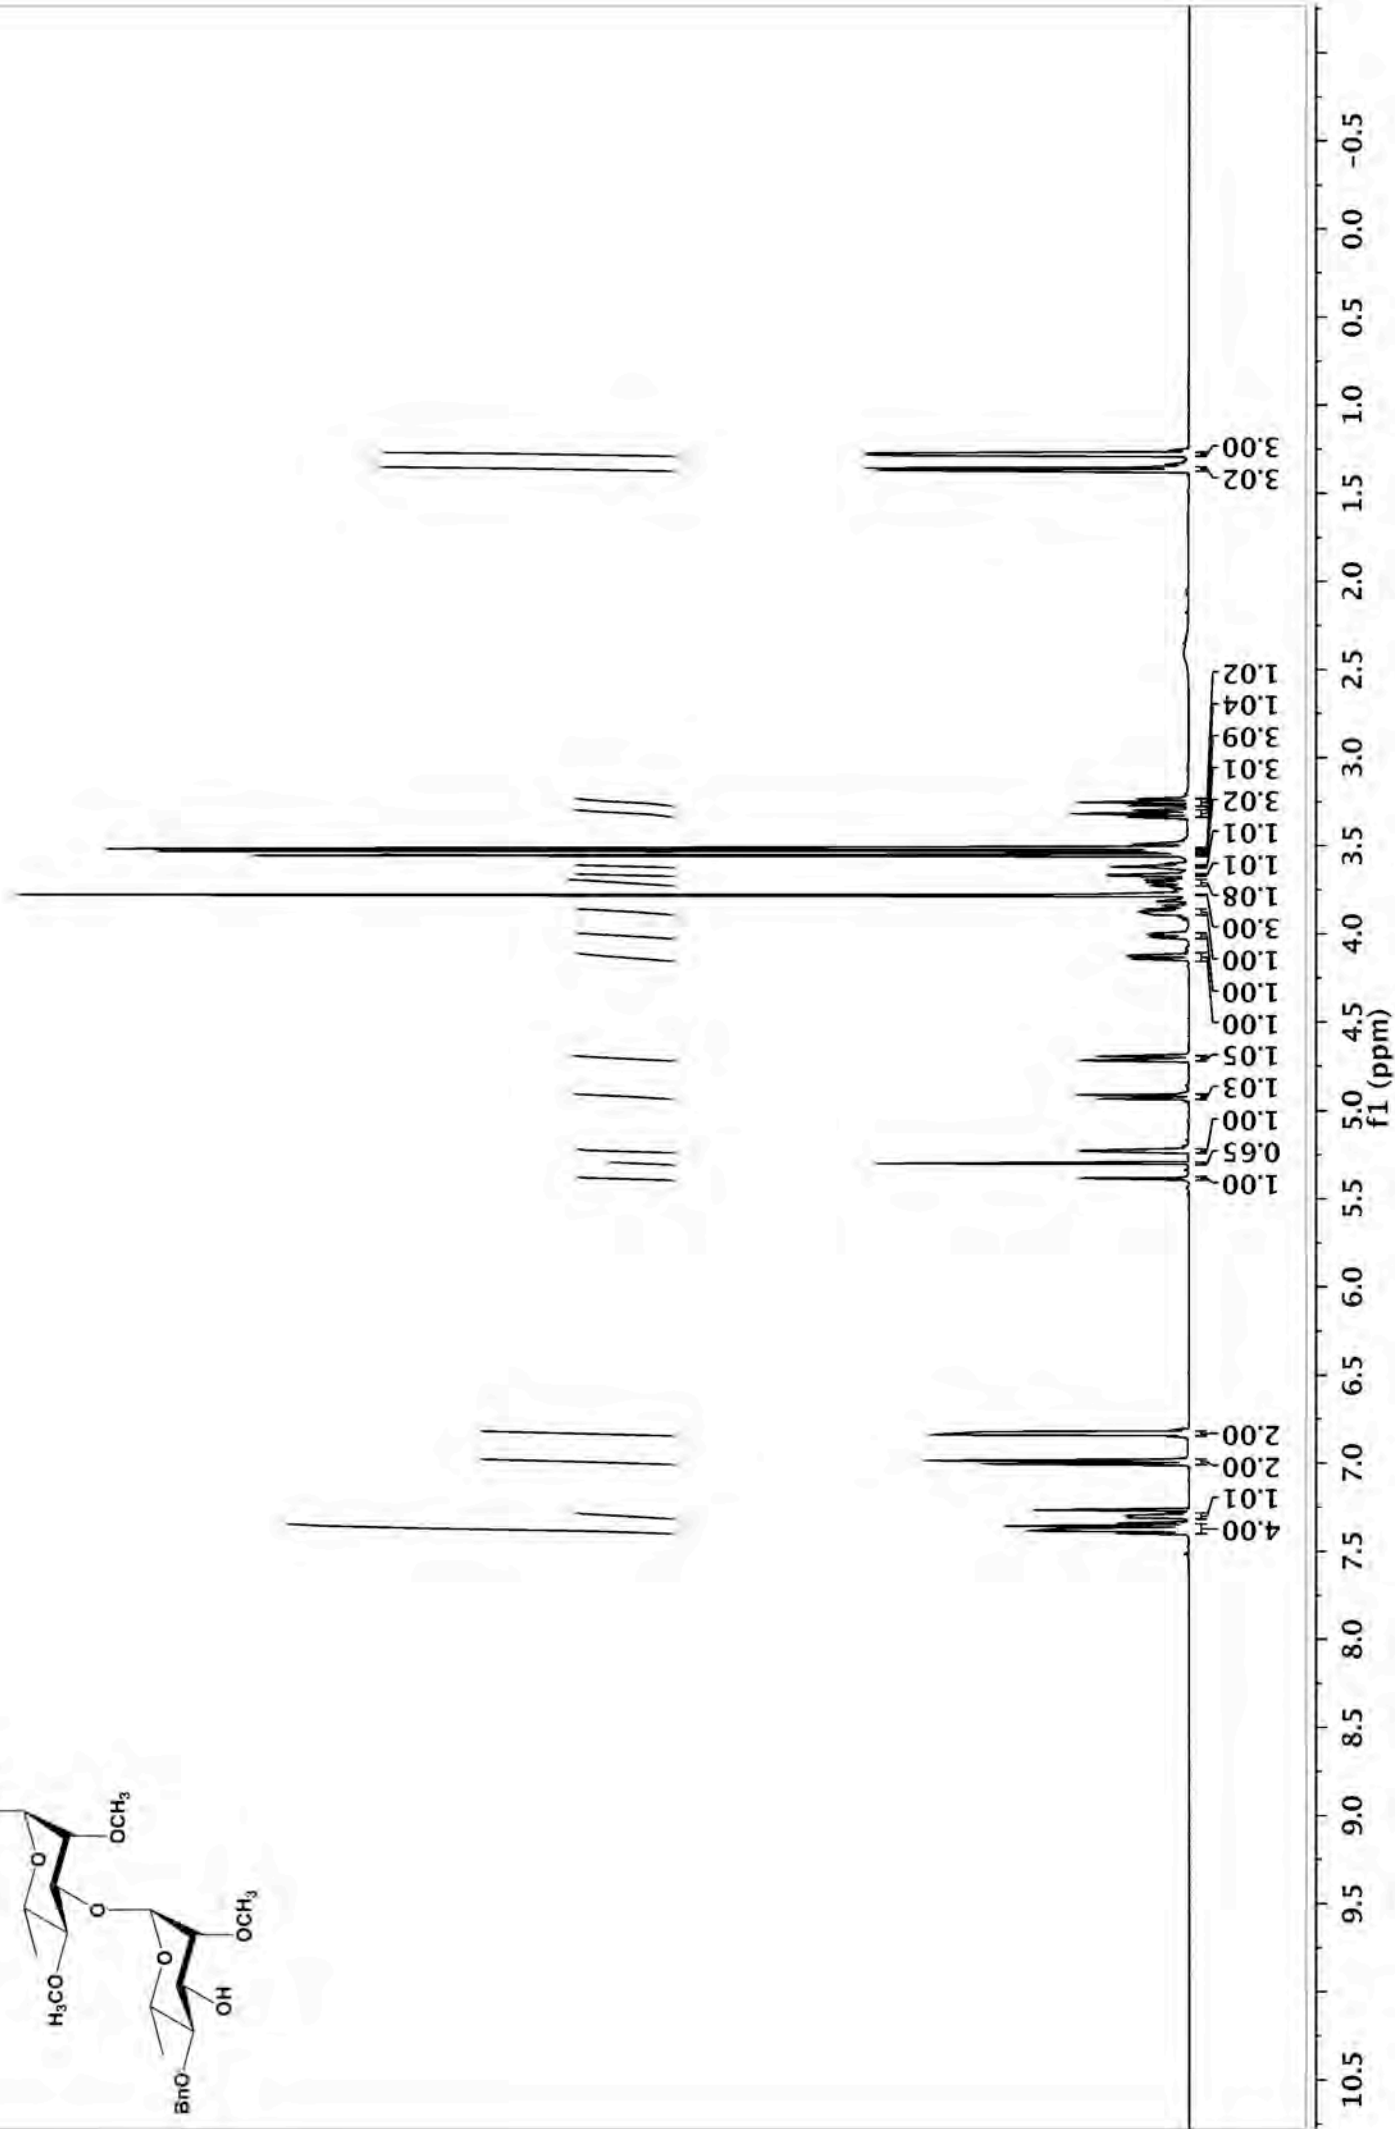

<sup>13</sup>C NMR of compound 27

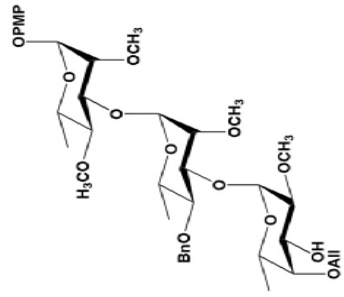

154.89  
150.47  
139.09  
134.97  
128.17  
127.41  
127.27  
117.48  
117.44  
114.61  
99.13  
98.55  
95.55  
81.93  
80.72  
80.19  
80.10  
79.51  
78.80  
77.29  
77.03  
76.78  
74.86  
70.18  
68.71  
68.68  
66.52  
61.24  
55.55  
55.55  
17.84  
16.93

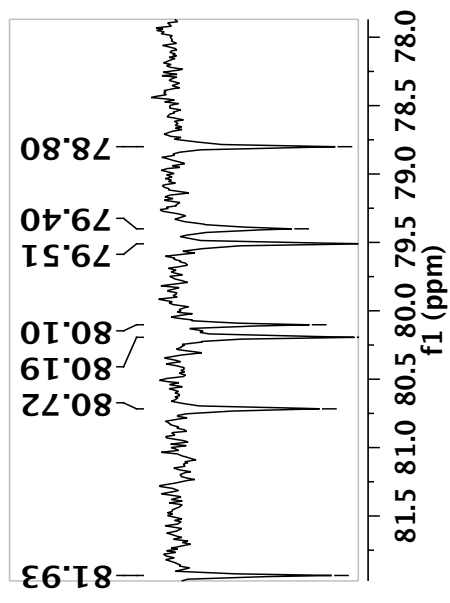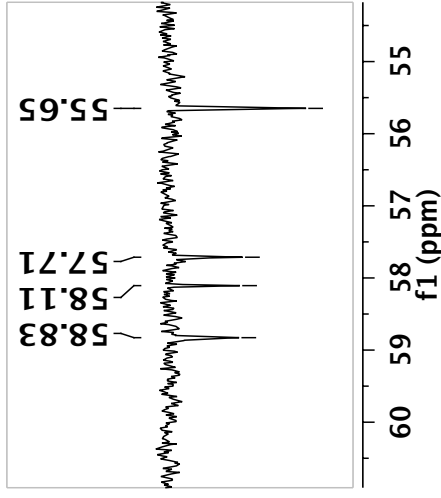

220 210 200 190 180 170 160 150 140 130 120 110 100 90 80 70 60 50 40 30 20 10 0



<sup>1</sup>H NMR of compound 27

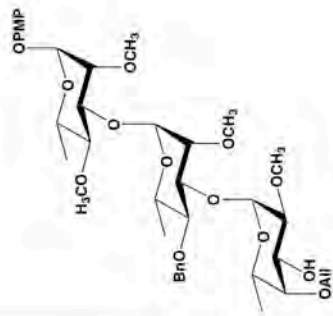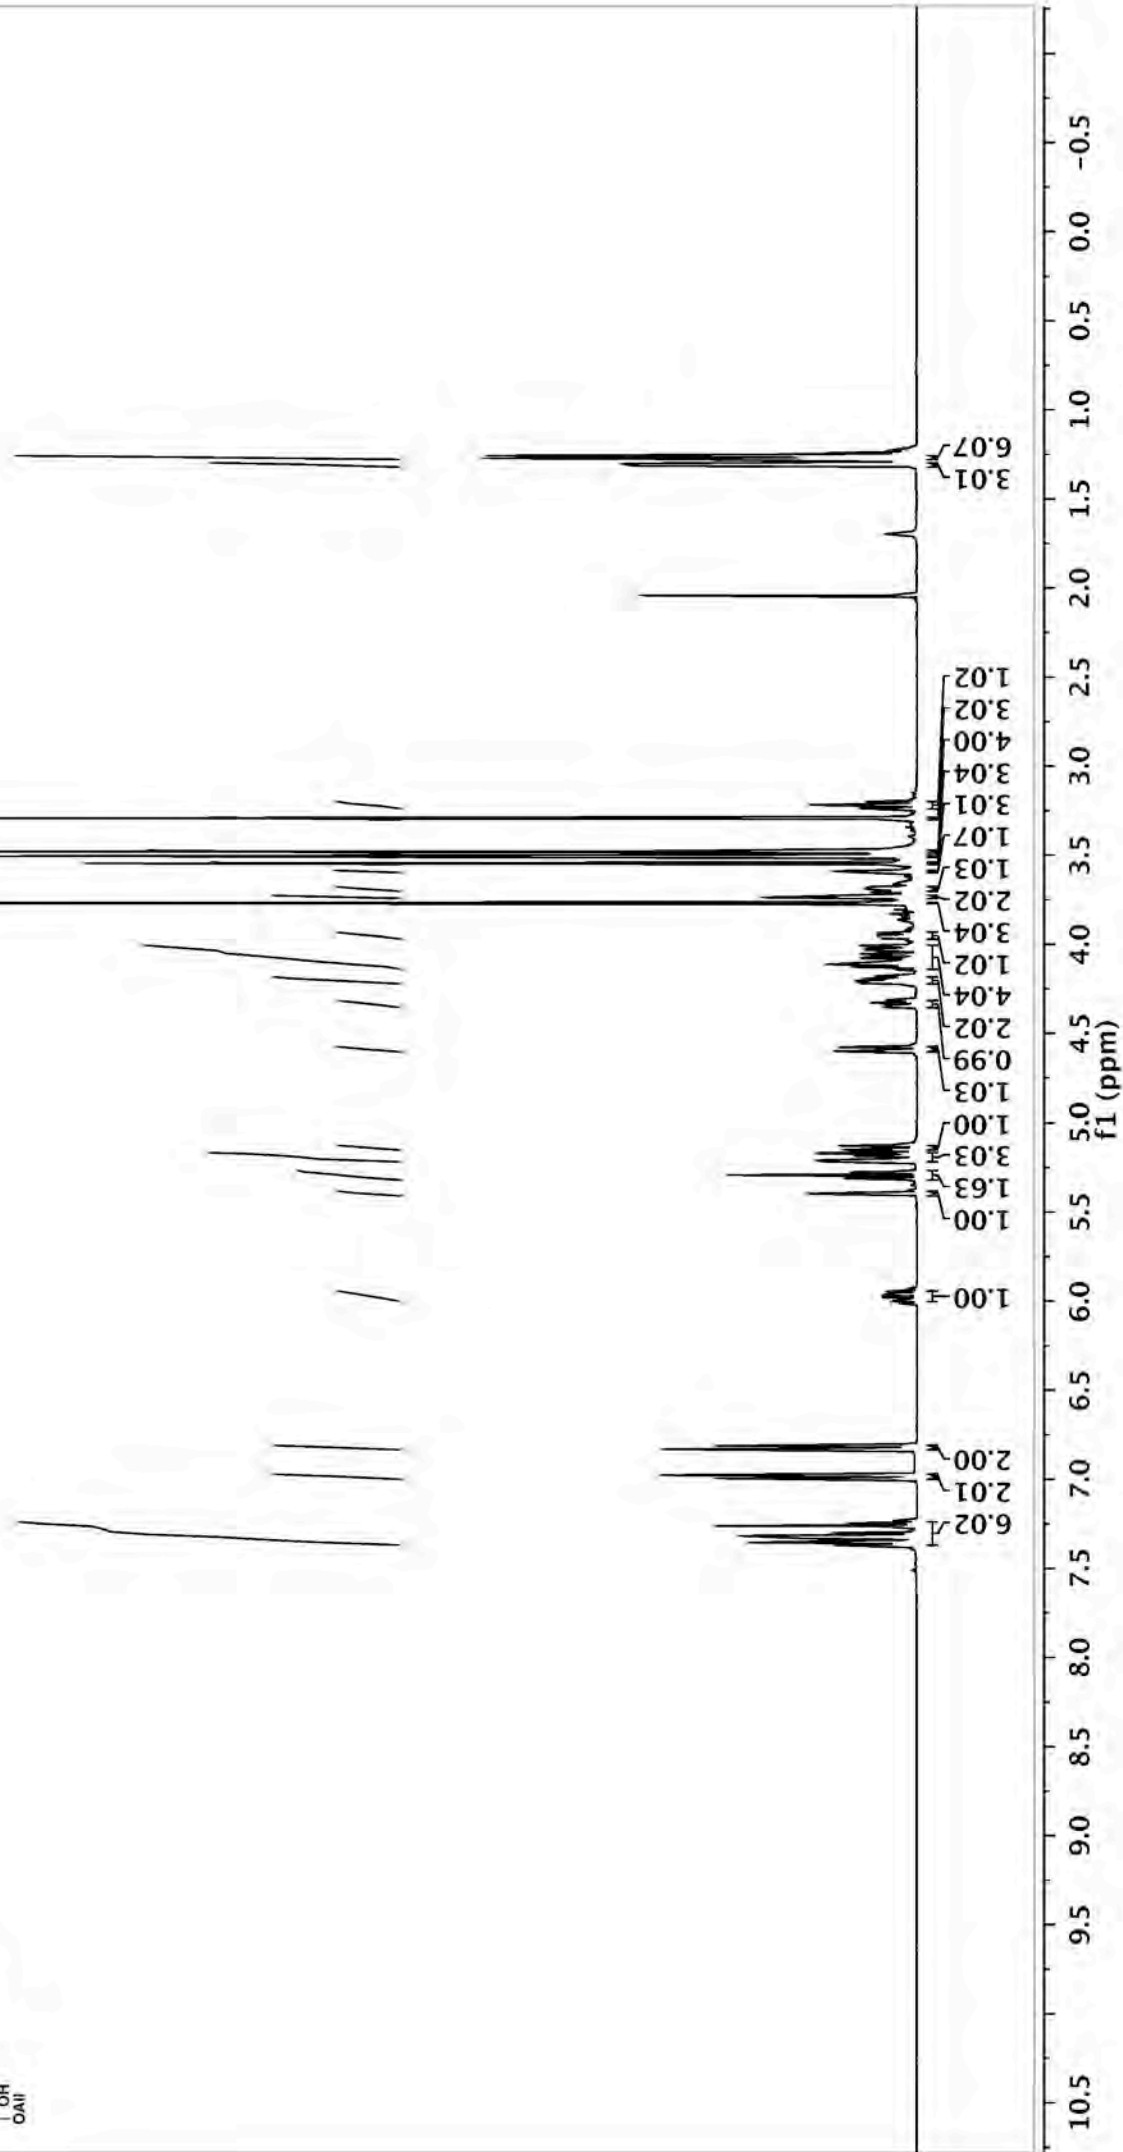

<sup>13</sup>C NMR of compound S5

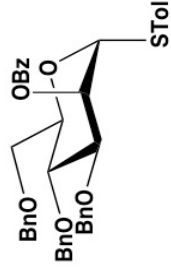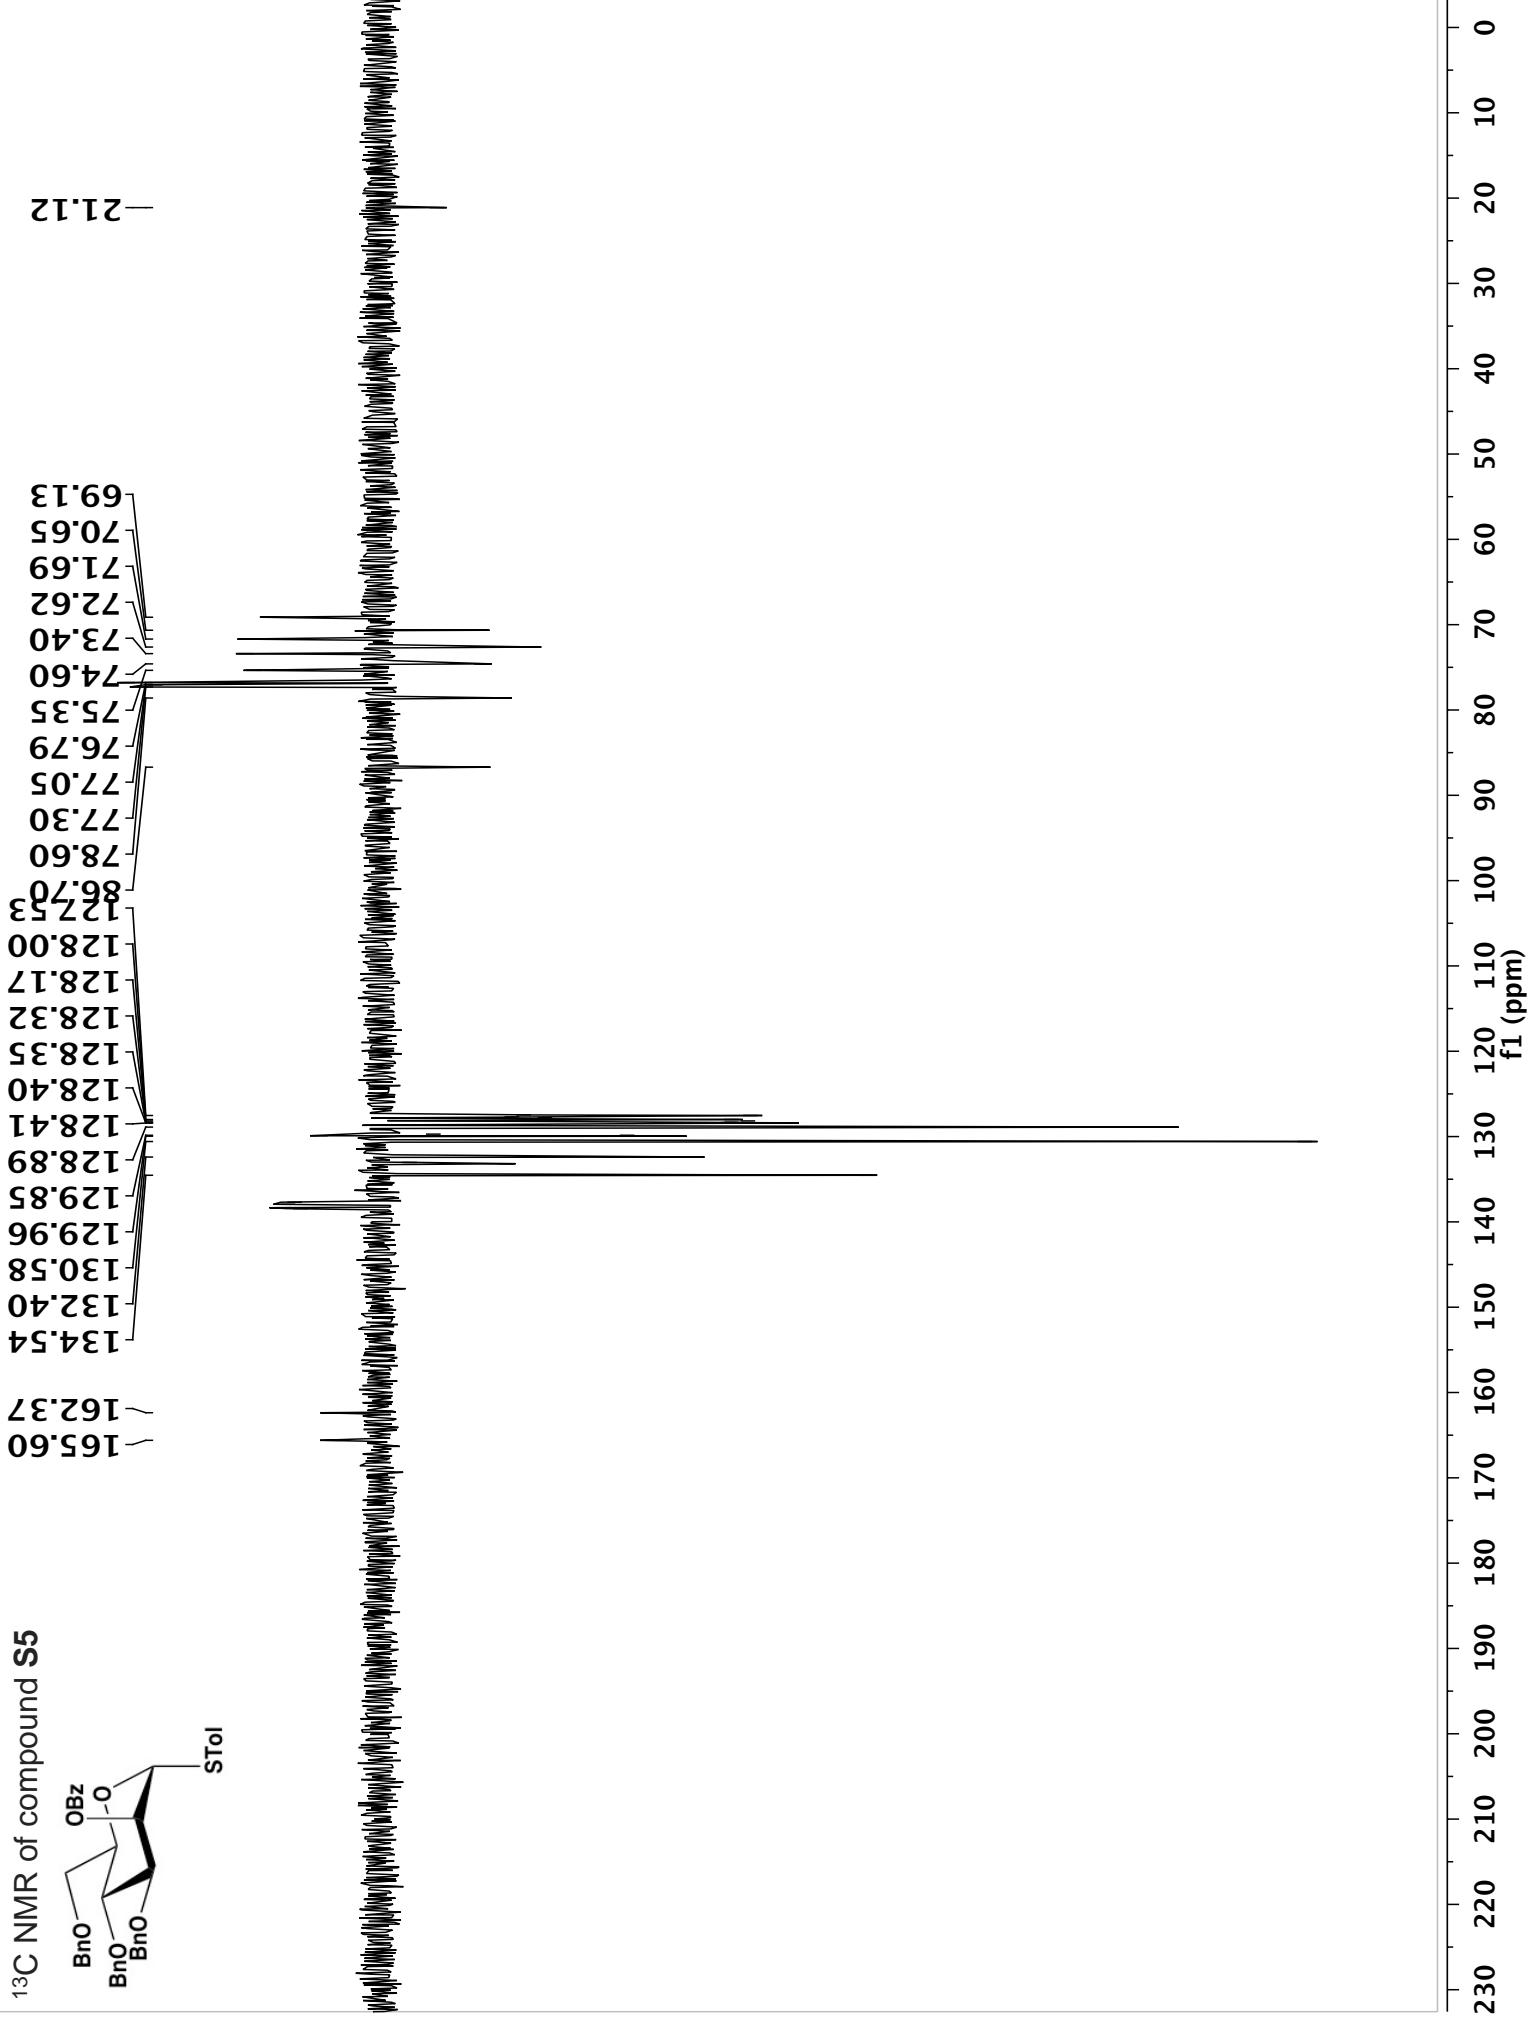



<sup>13</sup>C NMR of compound S6

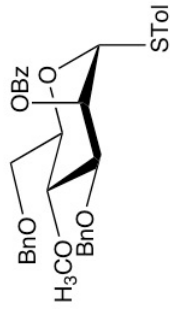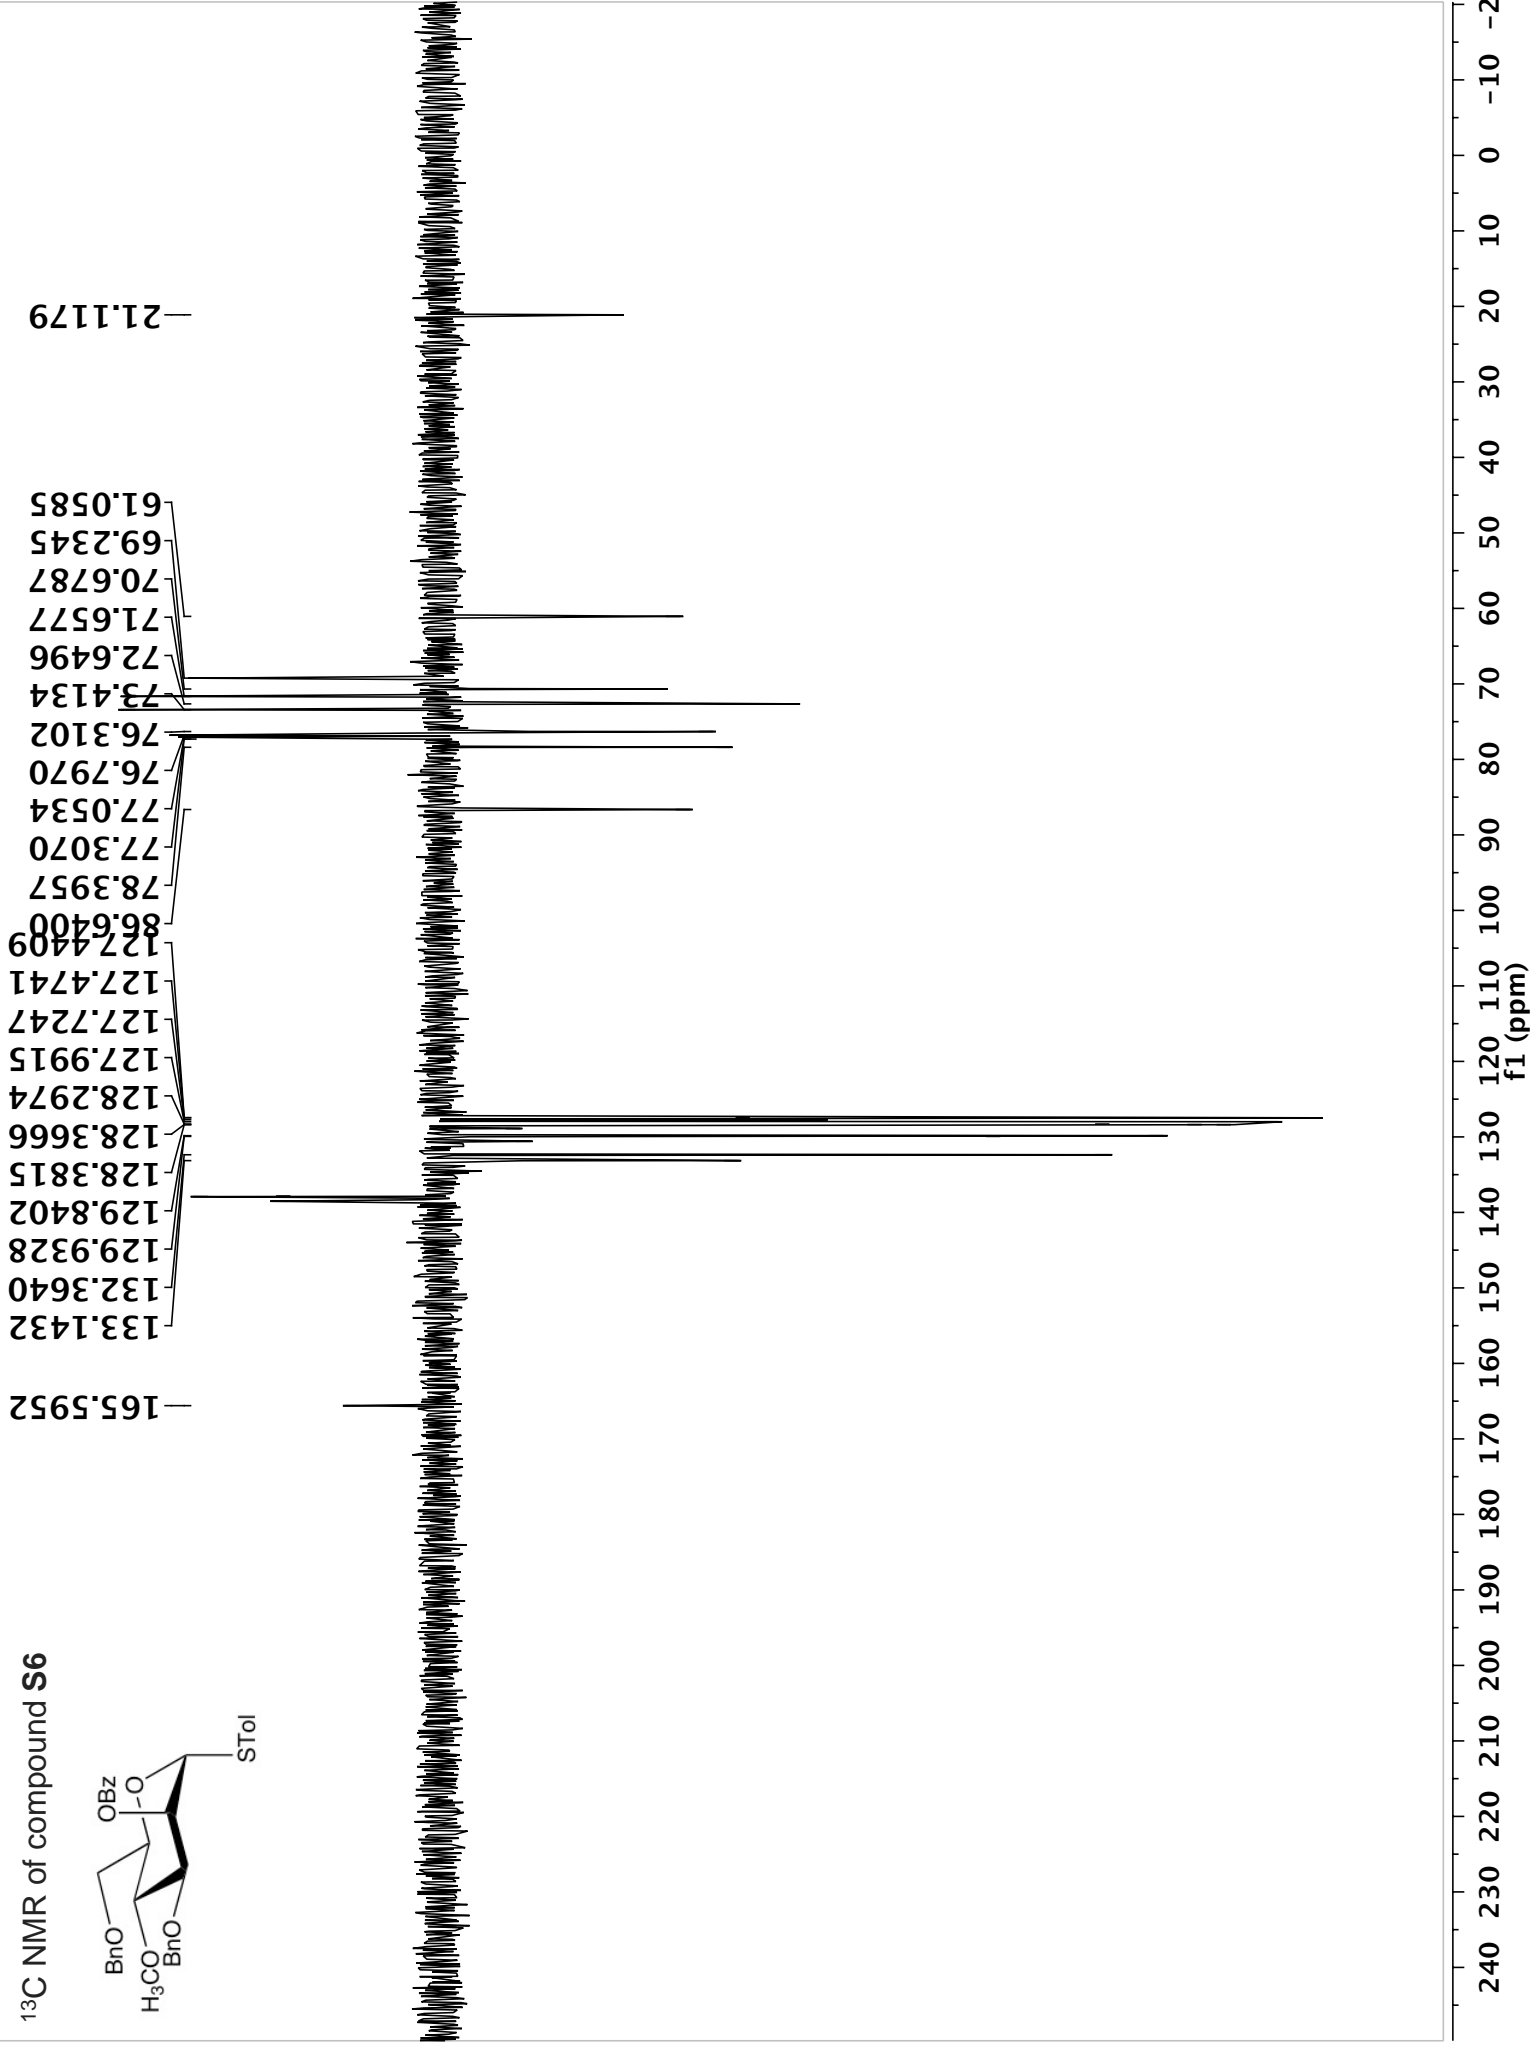



<sup>13</sup>C NMR of compound 35

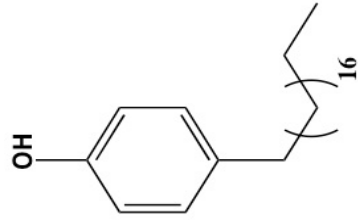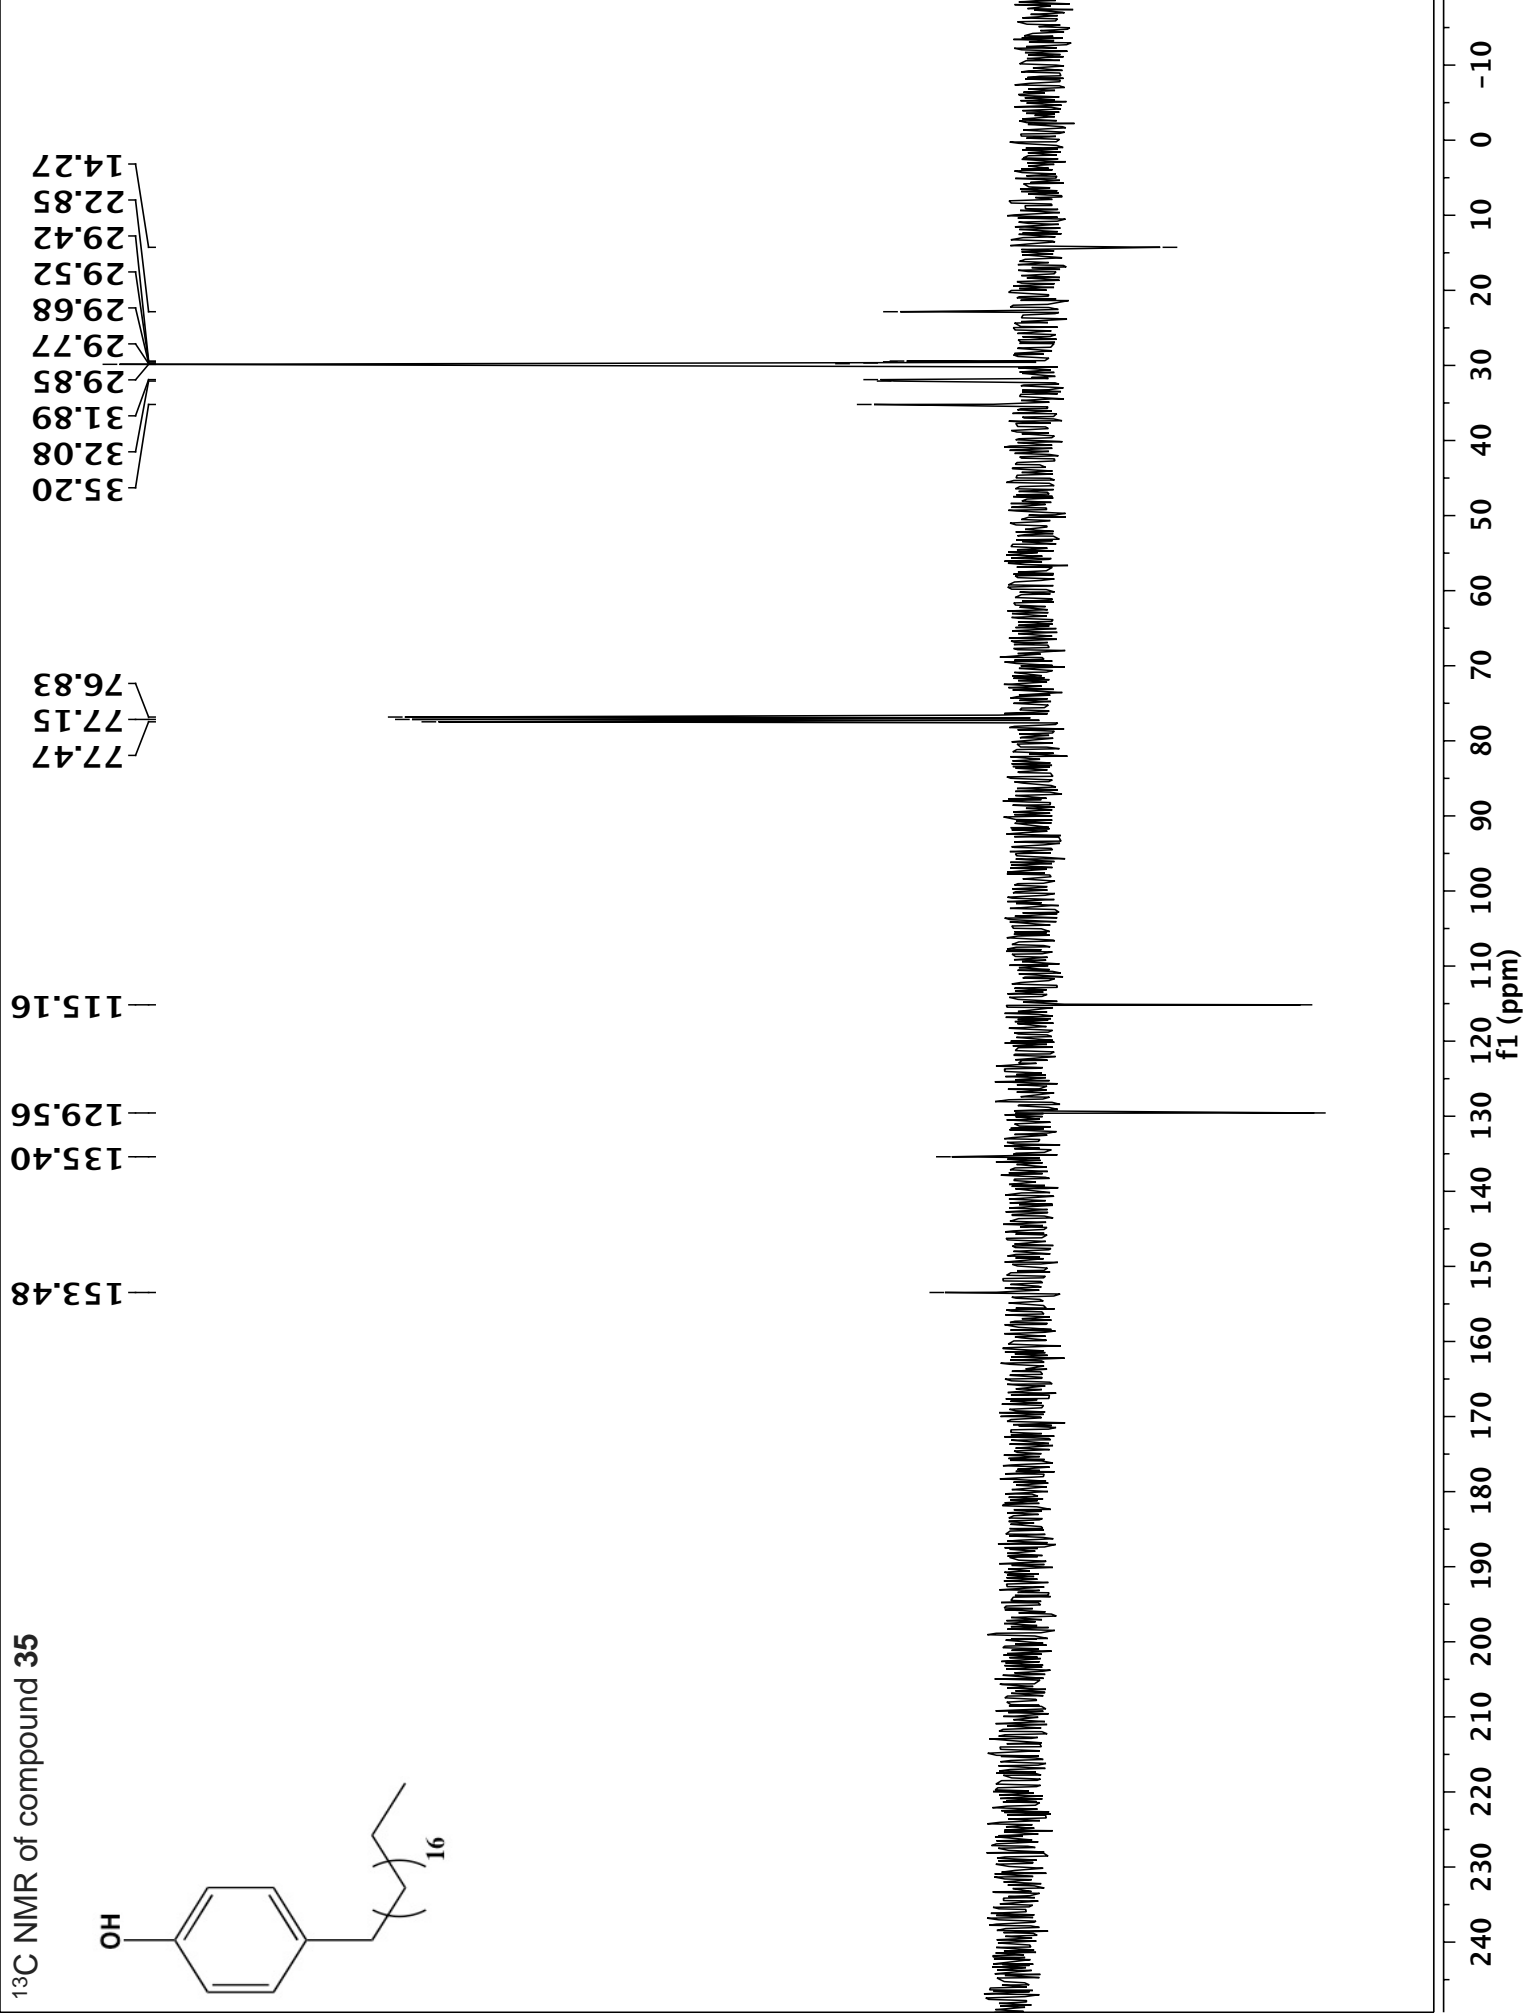

<sup>1</sup>H NMR of compound 35

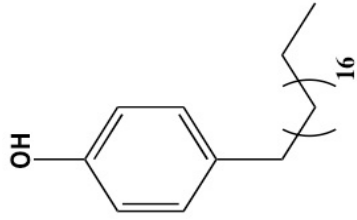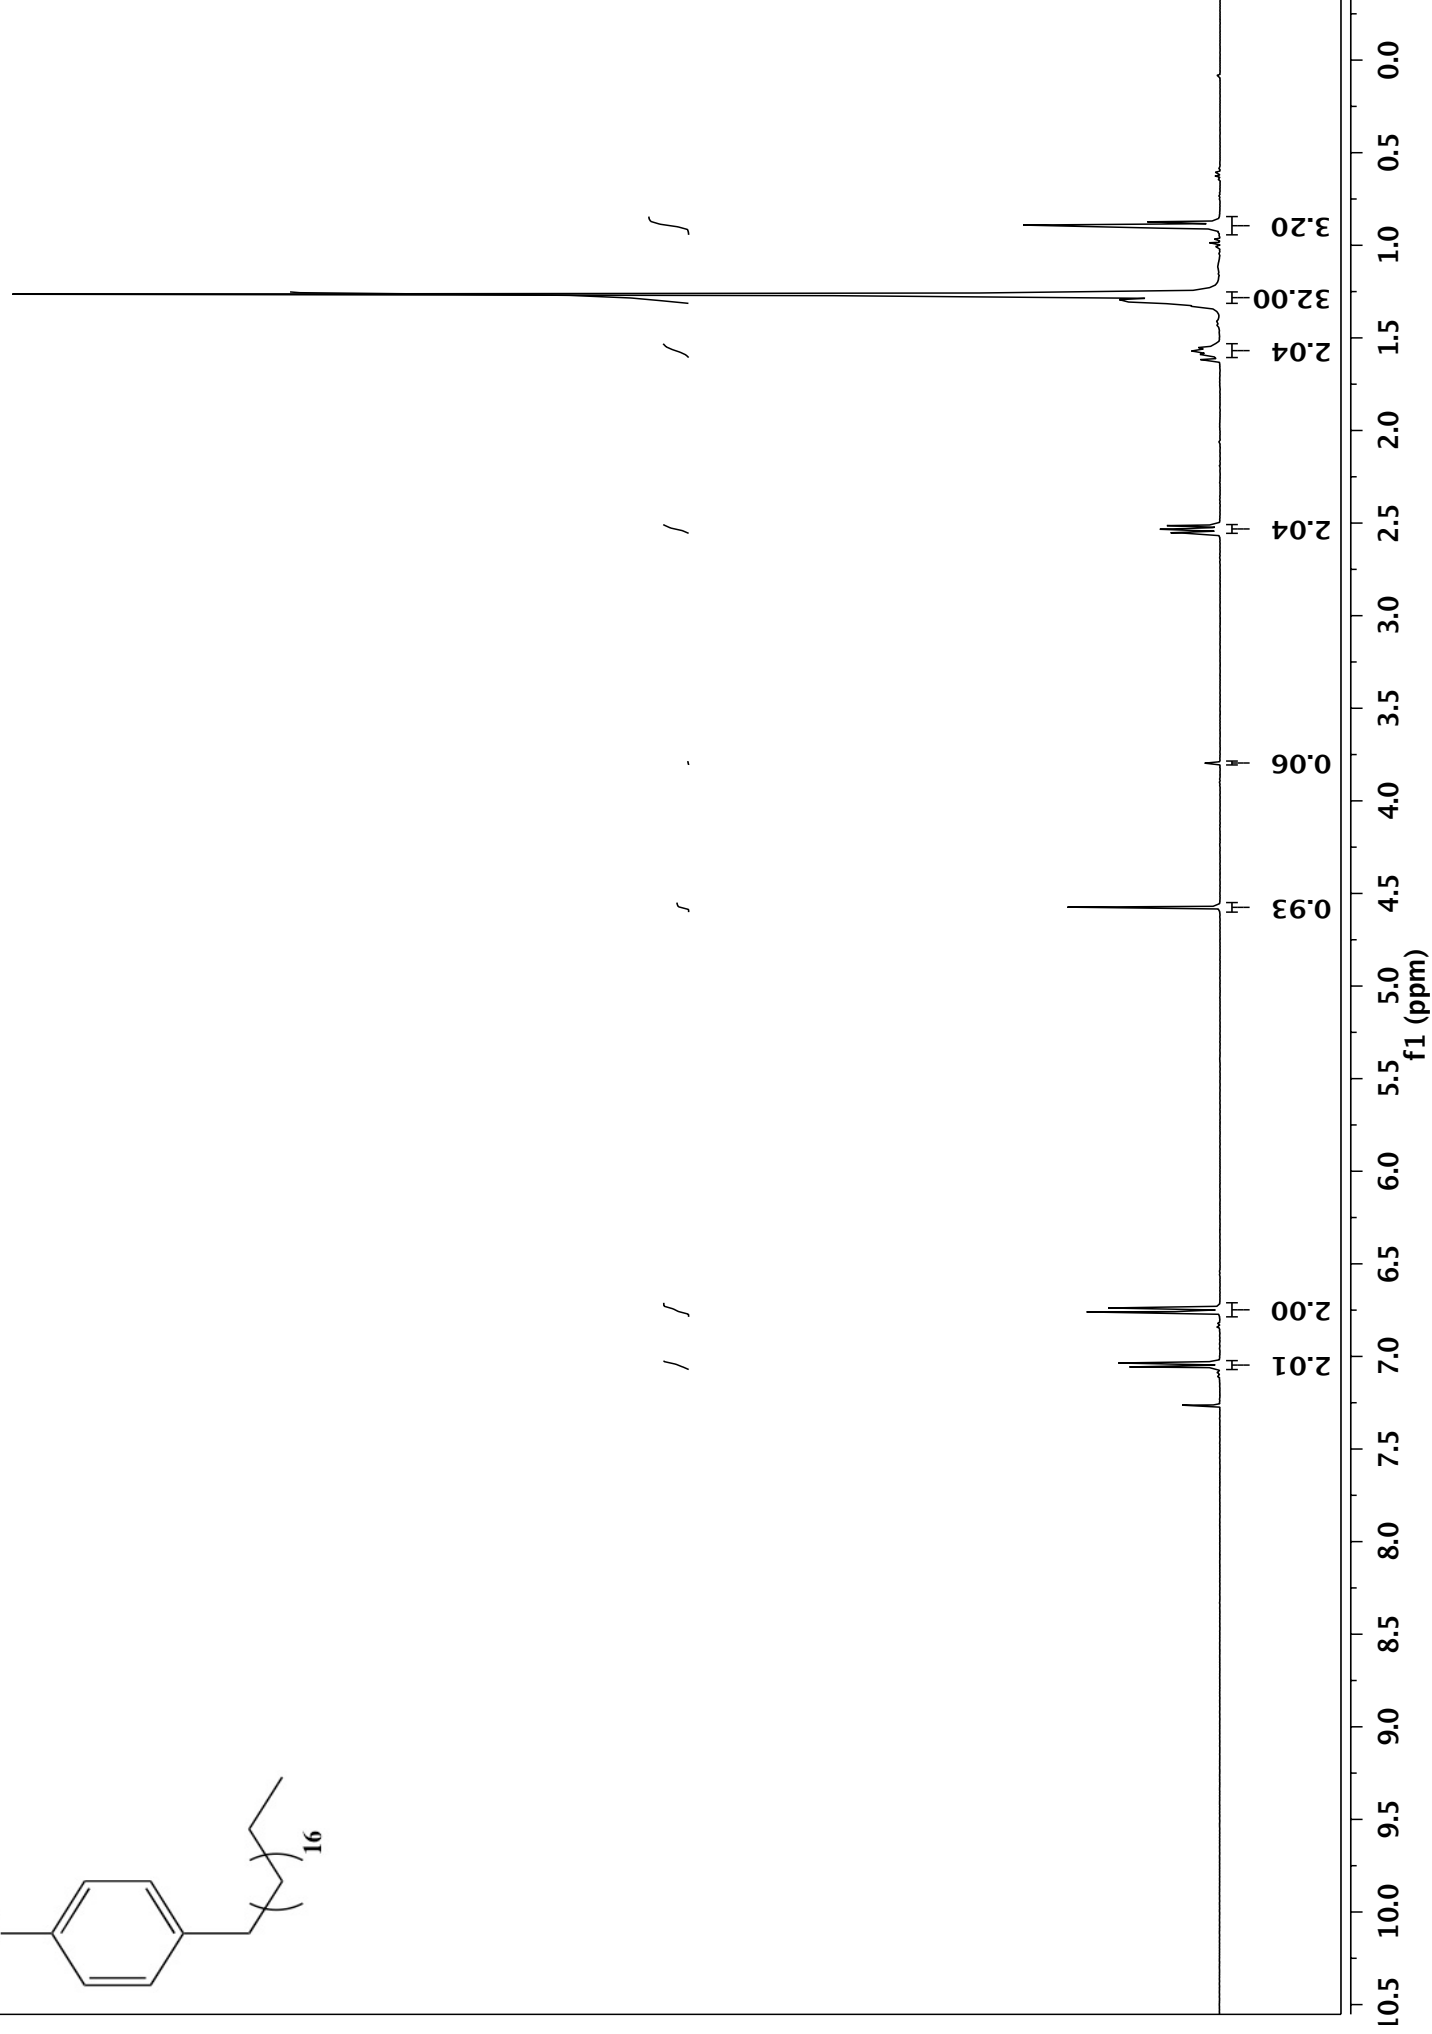

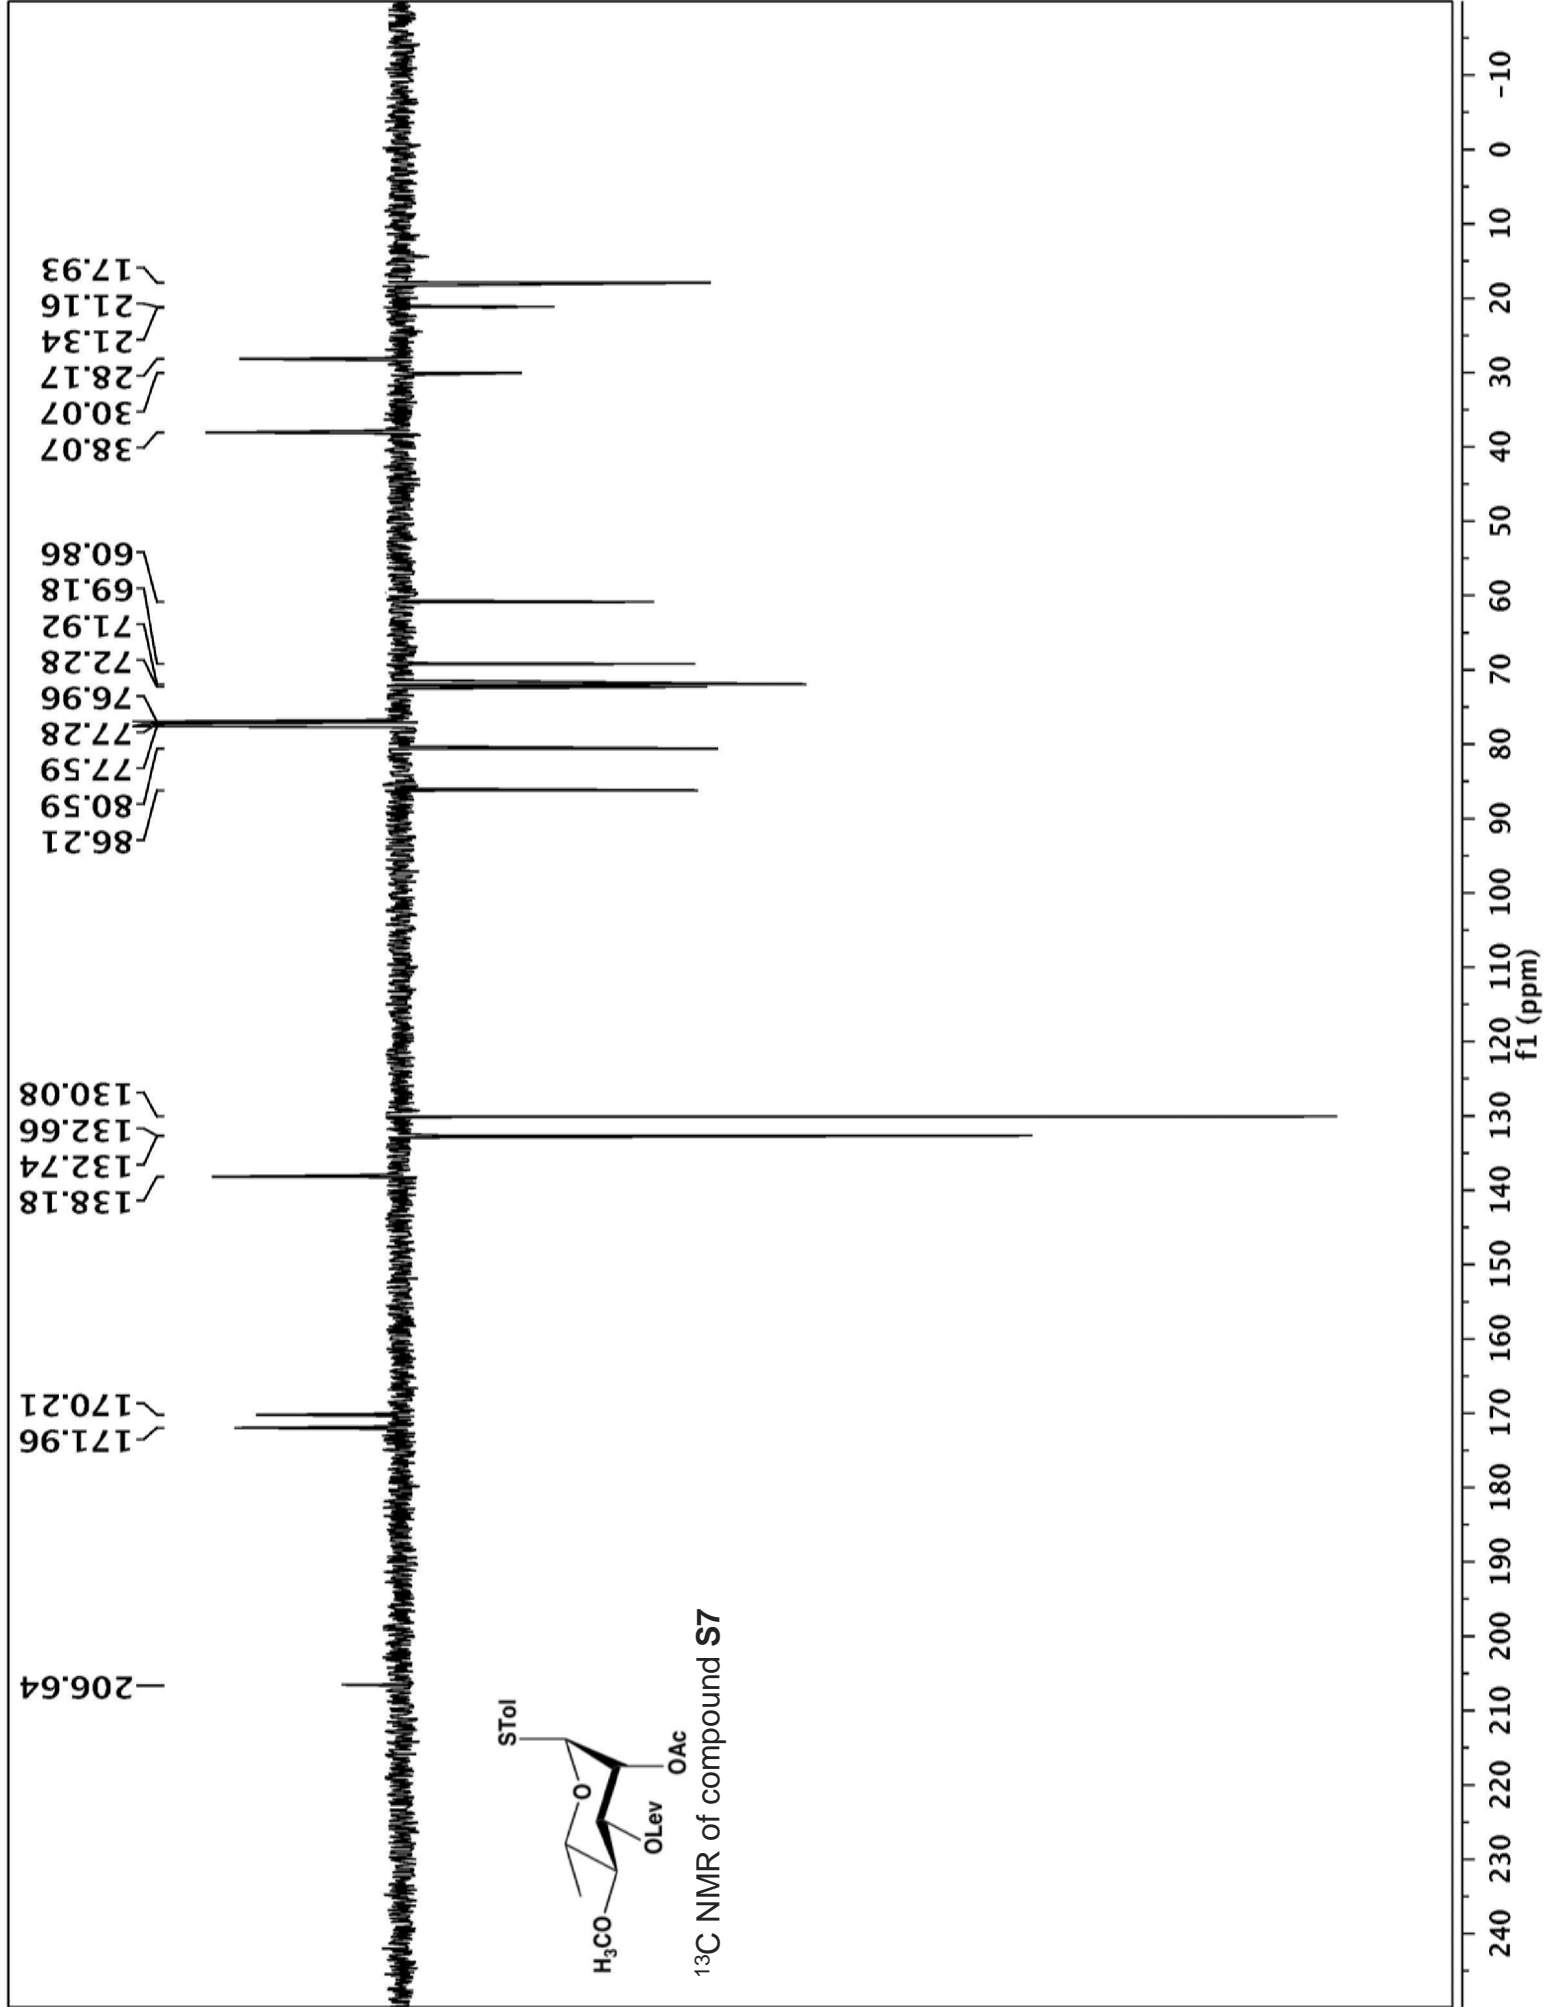



<sup>1</sup>H NMR of compound **S7**

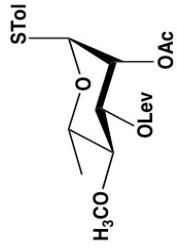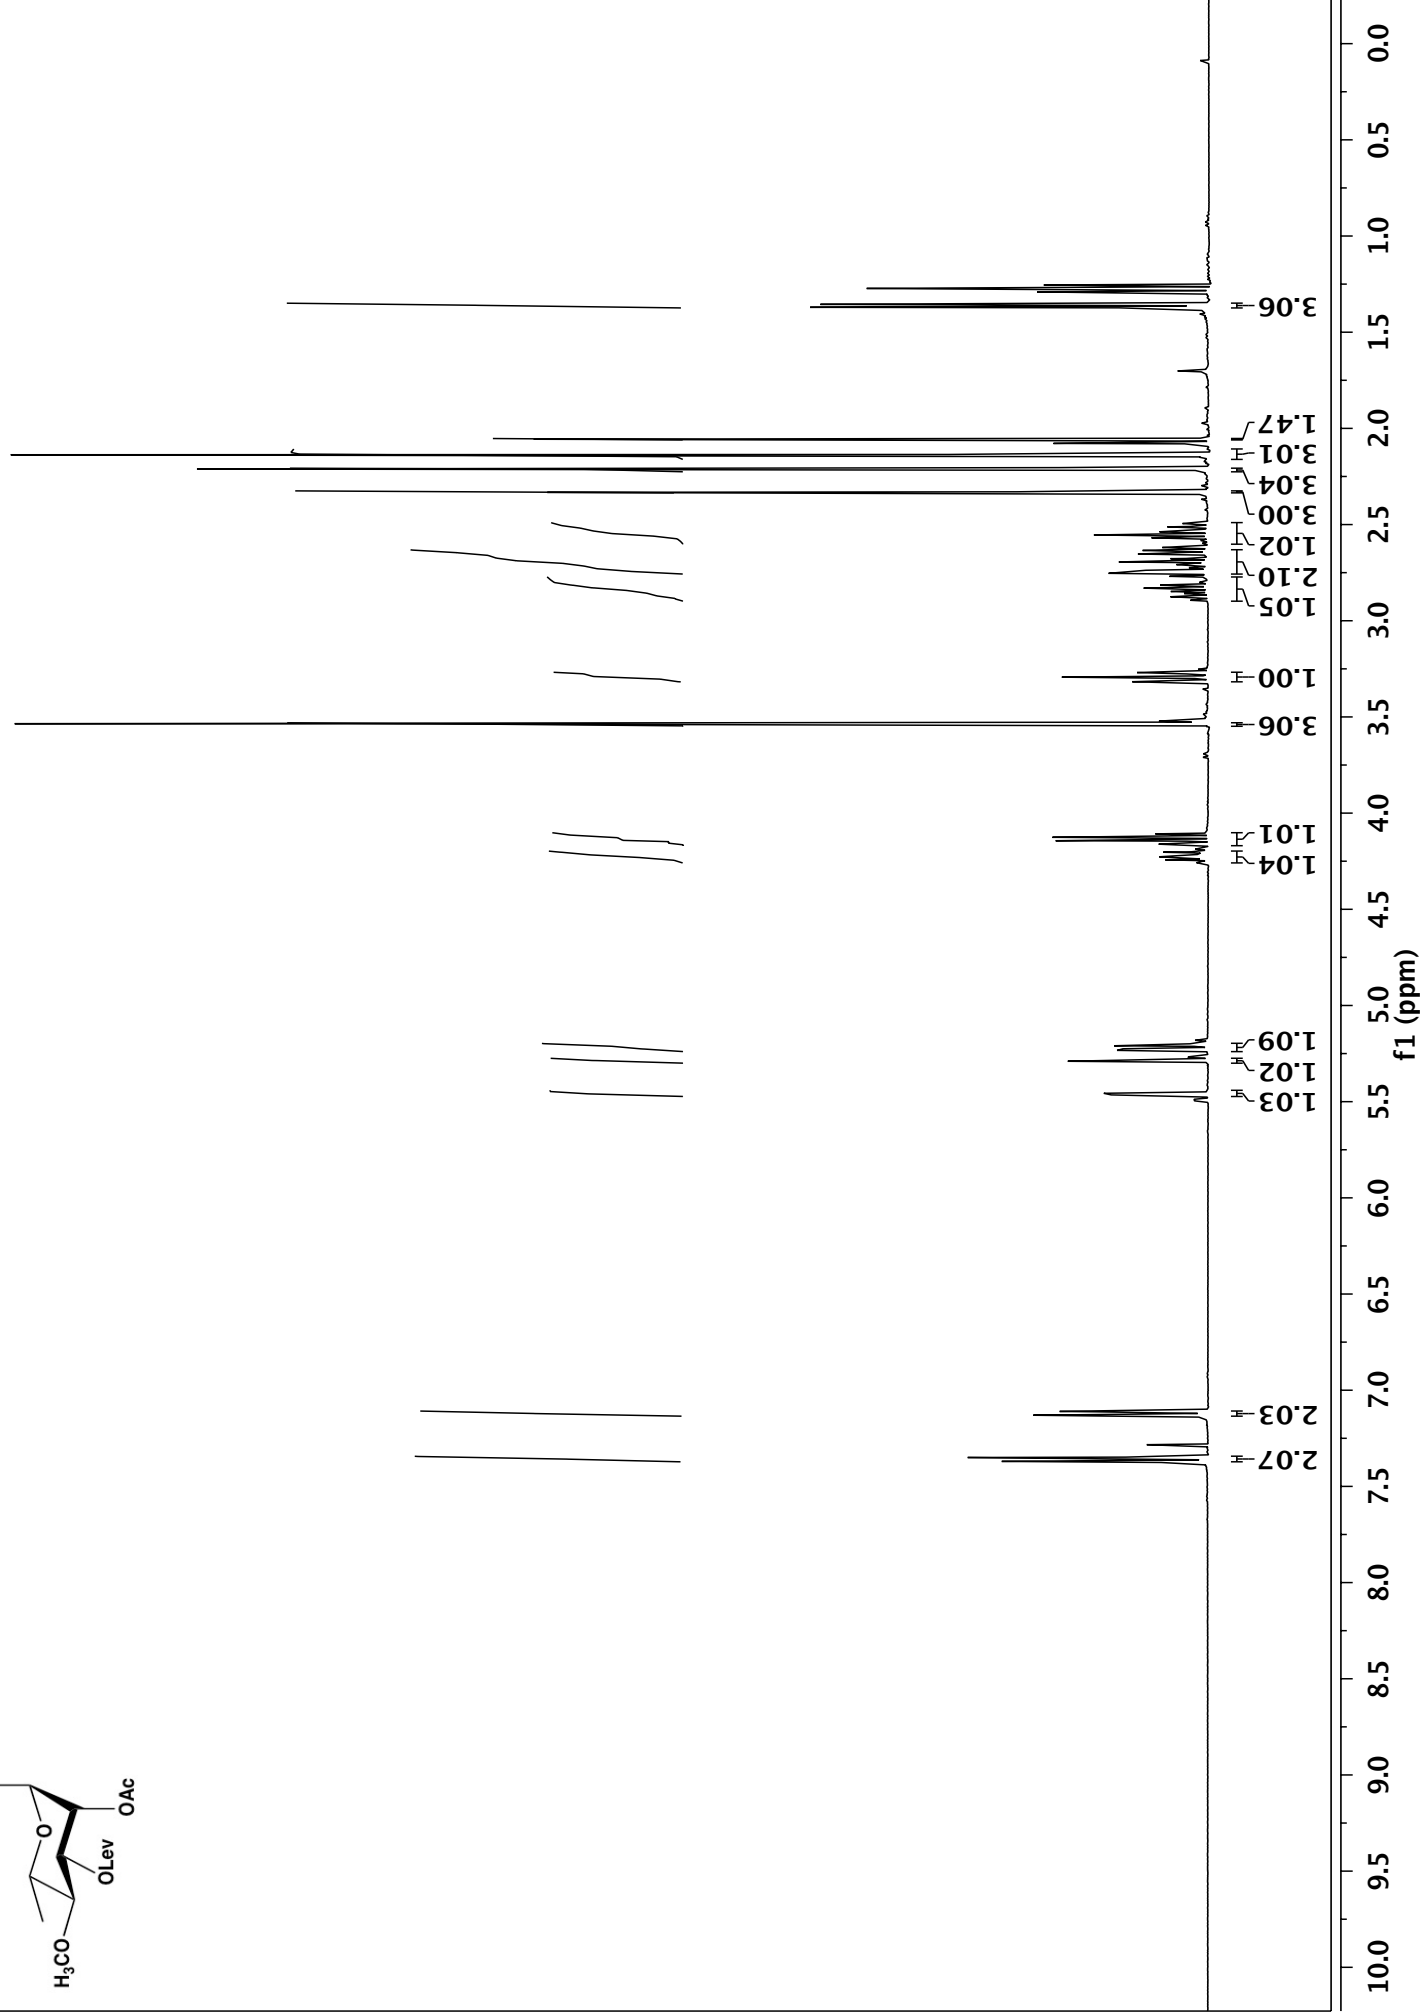

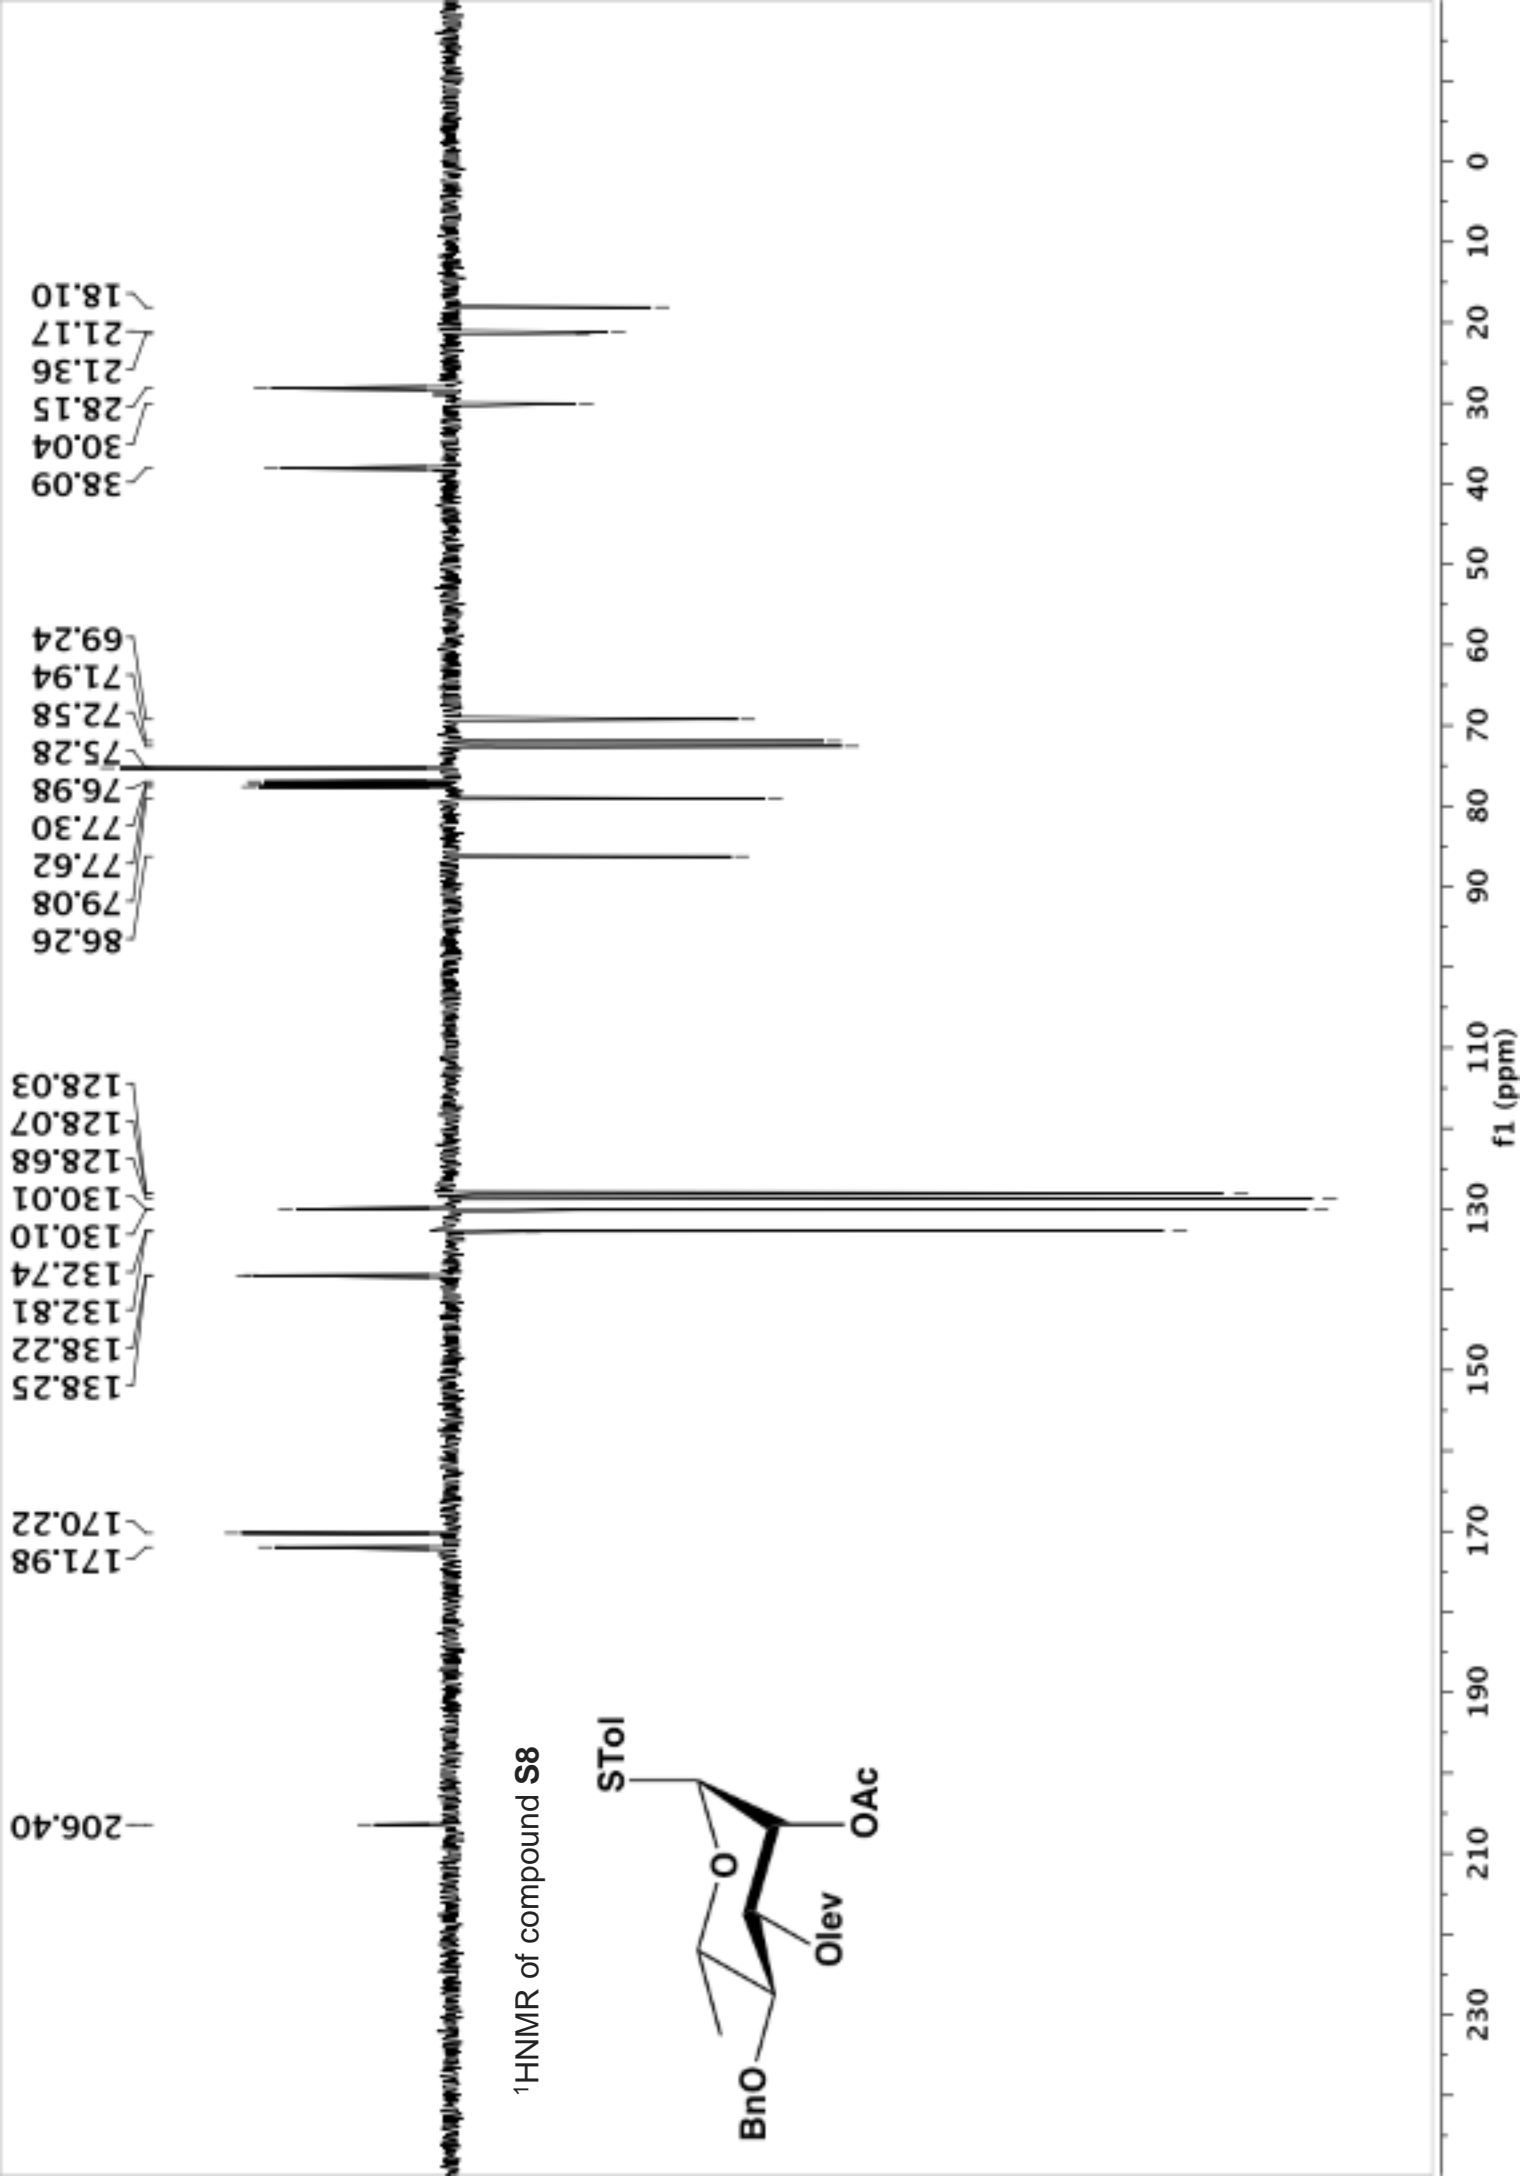

<sup>1</sup>HNMR of compound S8

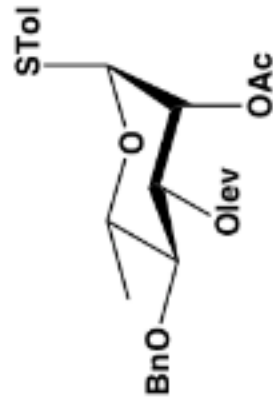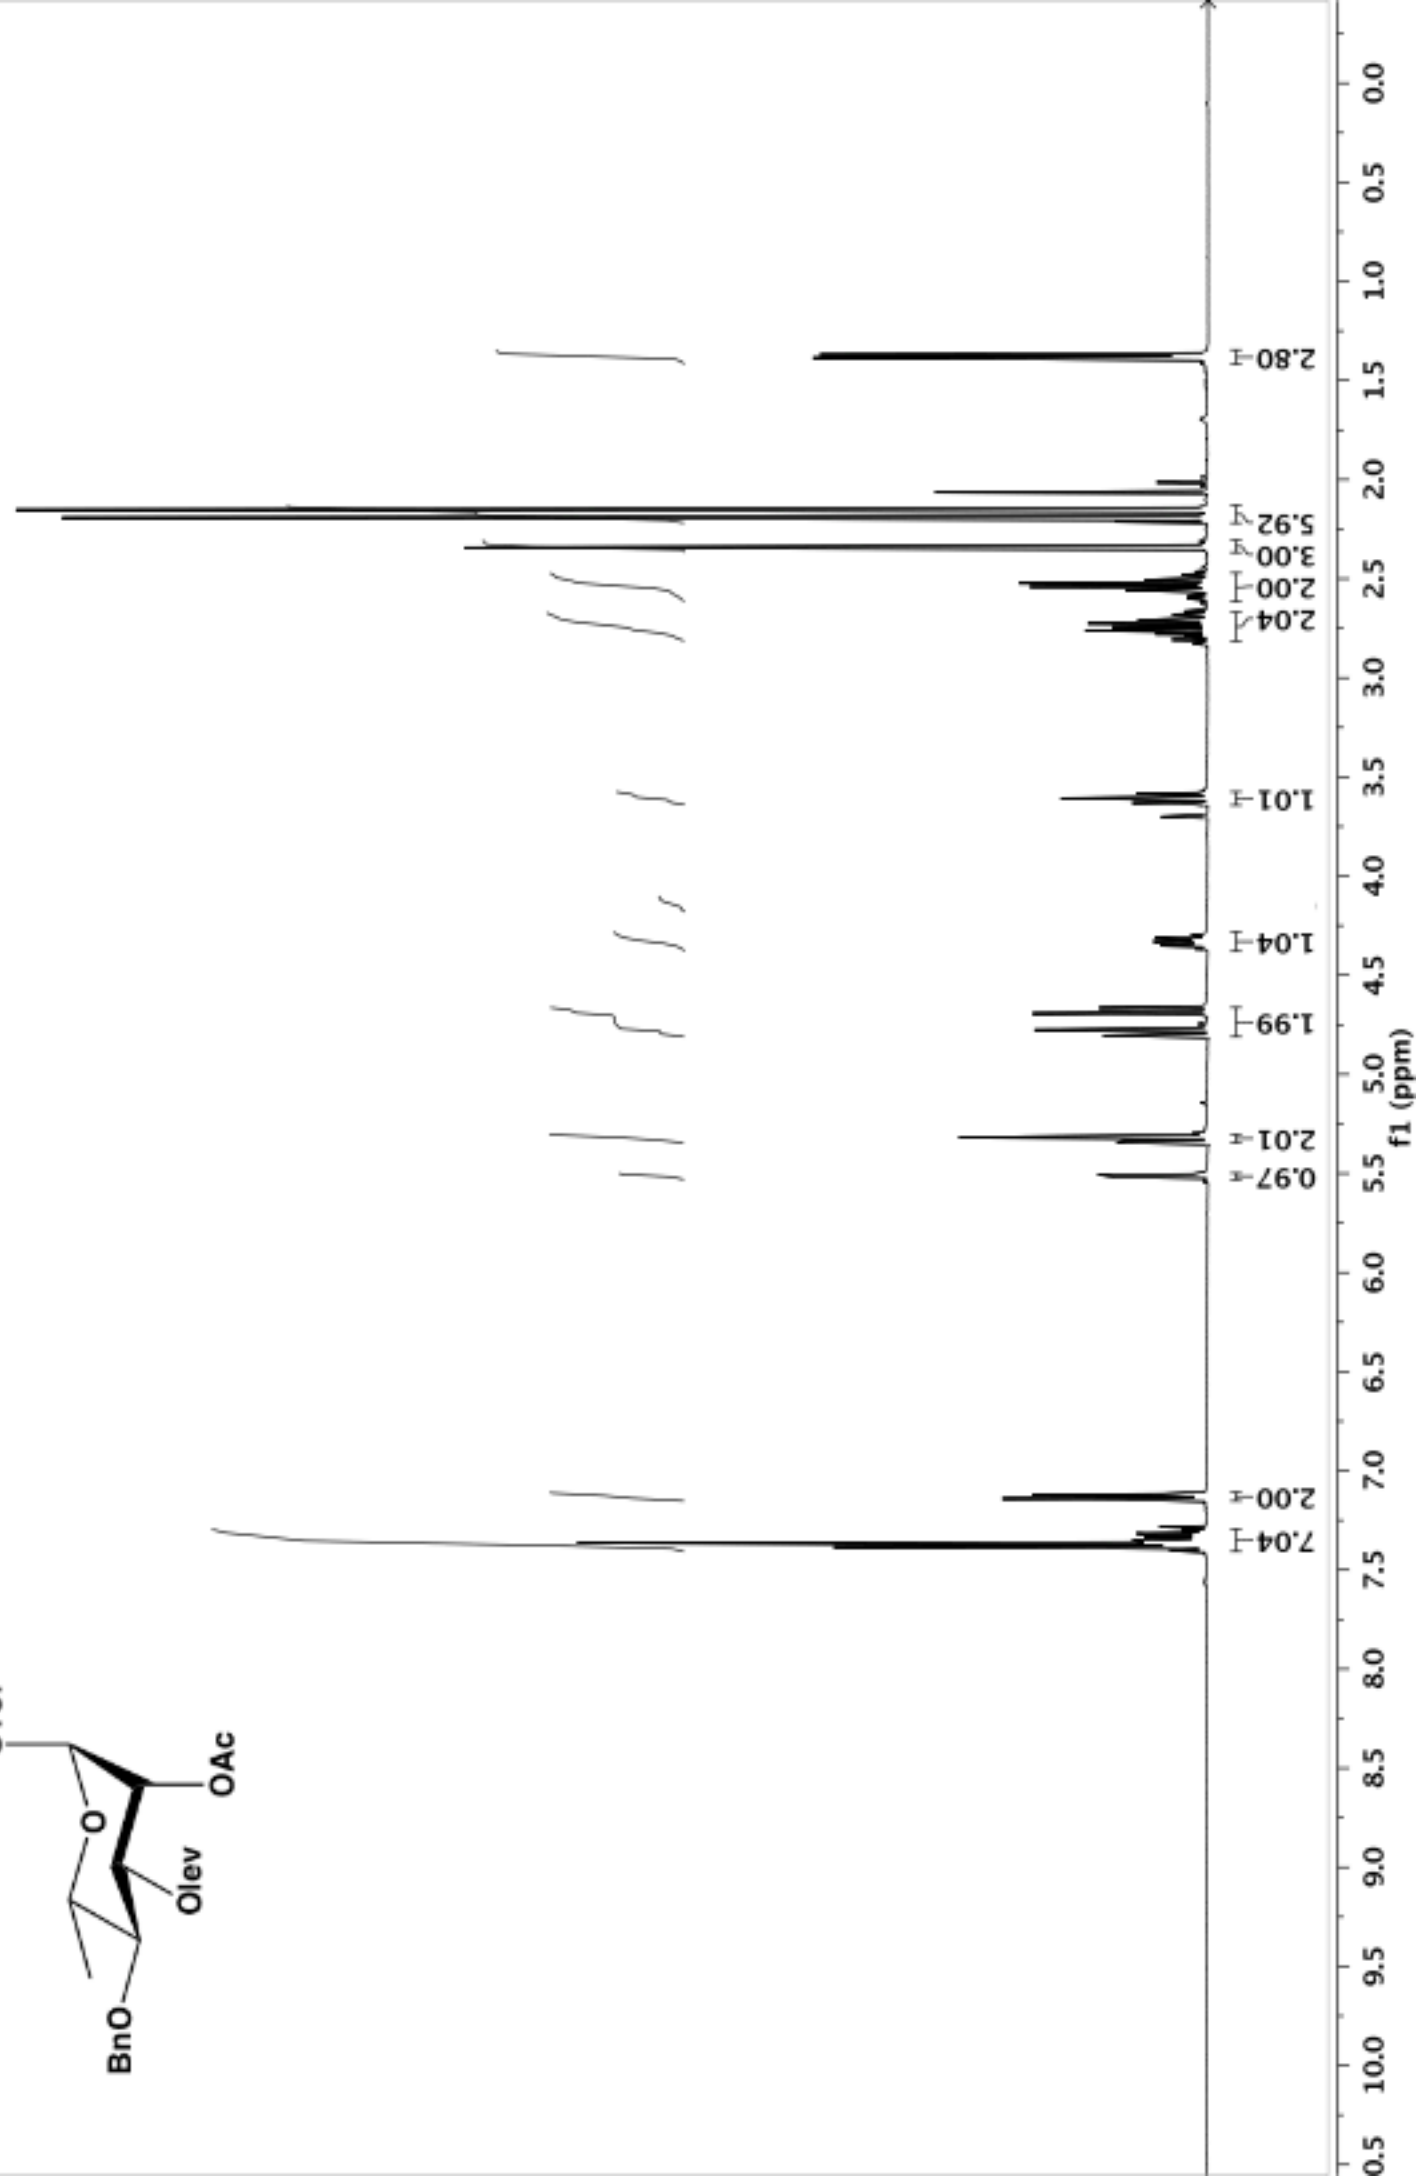

<sup>13</sup>C NMR of compound S9

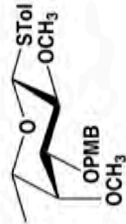

159.24  
137.19  
132.35  
130.64  
130.53  
129.43  
129.27  
113.82  
88.12  
83.56  
79.70  
79.28  
77.30  
77.04  
76.79  
74.45  
72.38  
61.80  
61.16  
55.26  
21.09  
16.91

240 230 220 210 200 190 180 170 160 150 140 130 120 110 100 90 80 70 60 50 40 30 20 10 0 -10 -20

f1 (ppm)

<sup>1</sup>H NMR of compound **S9**

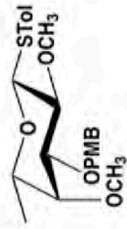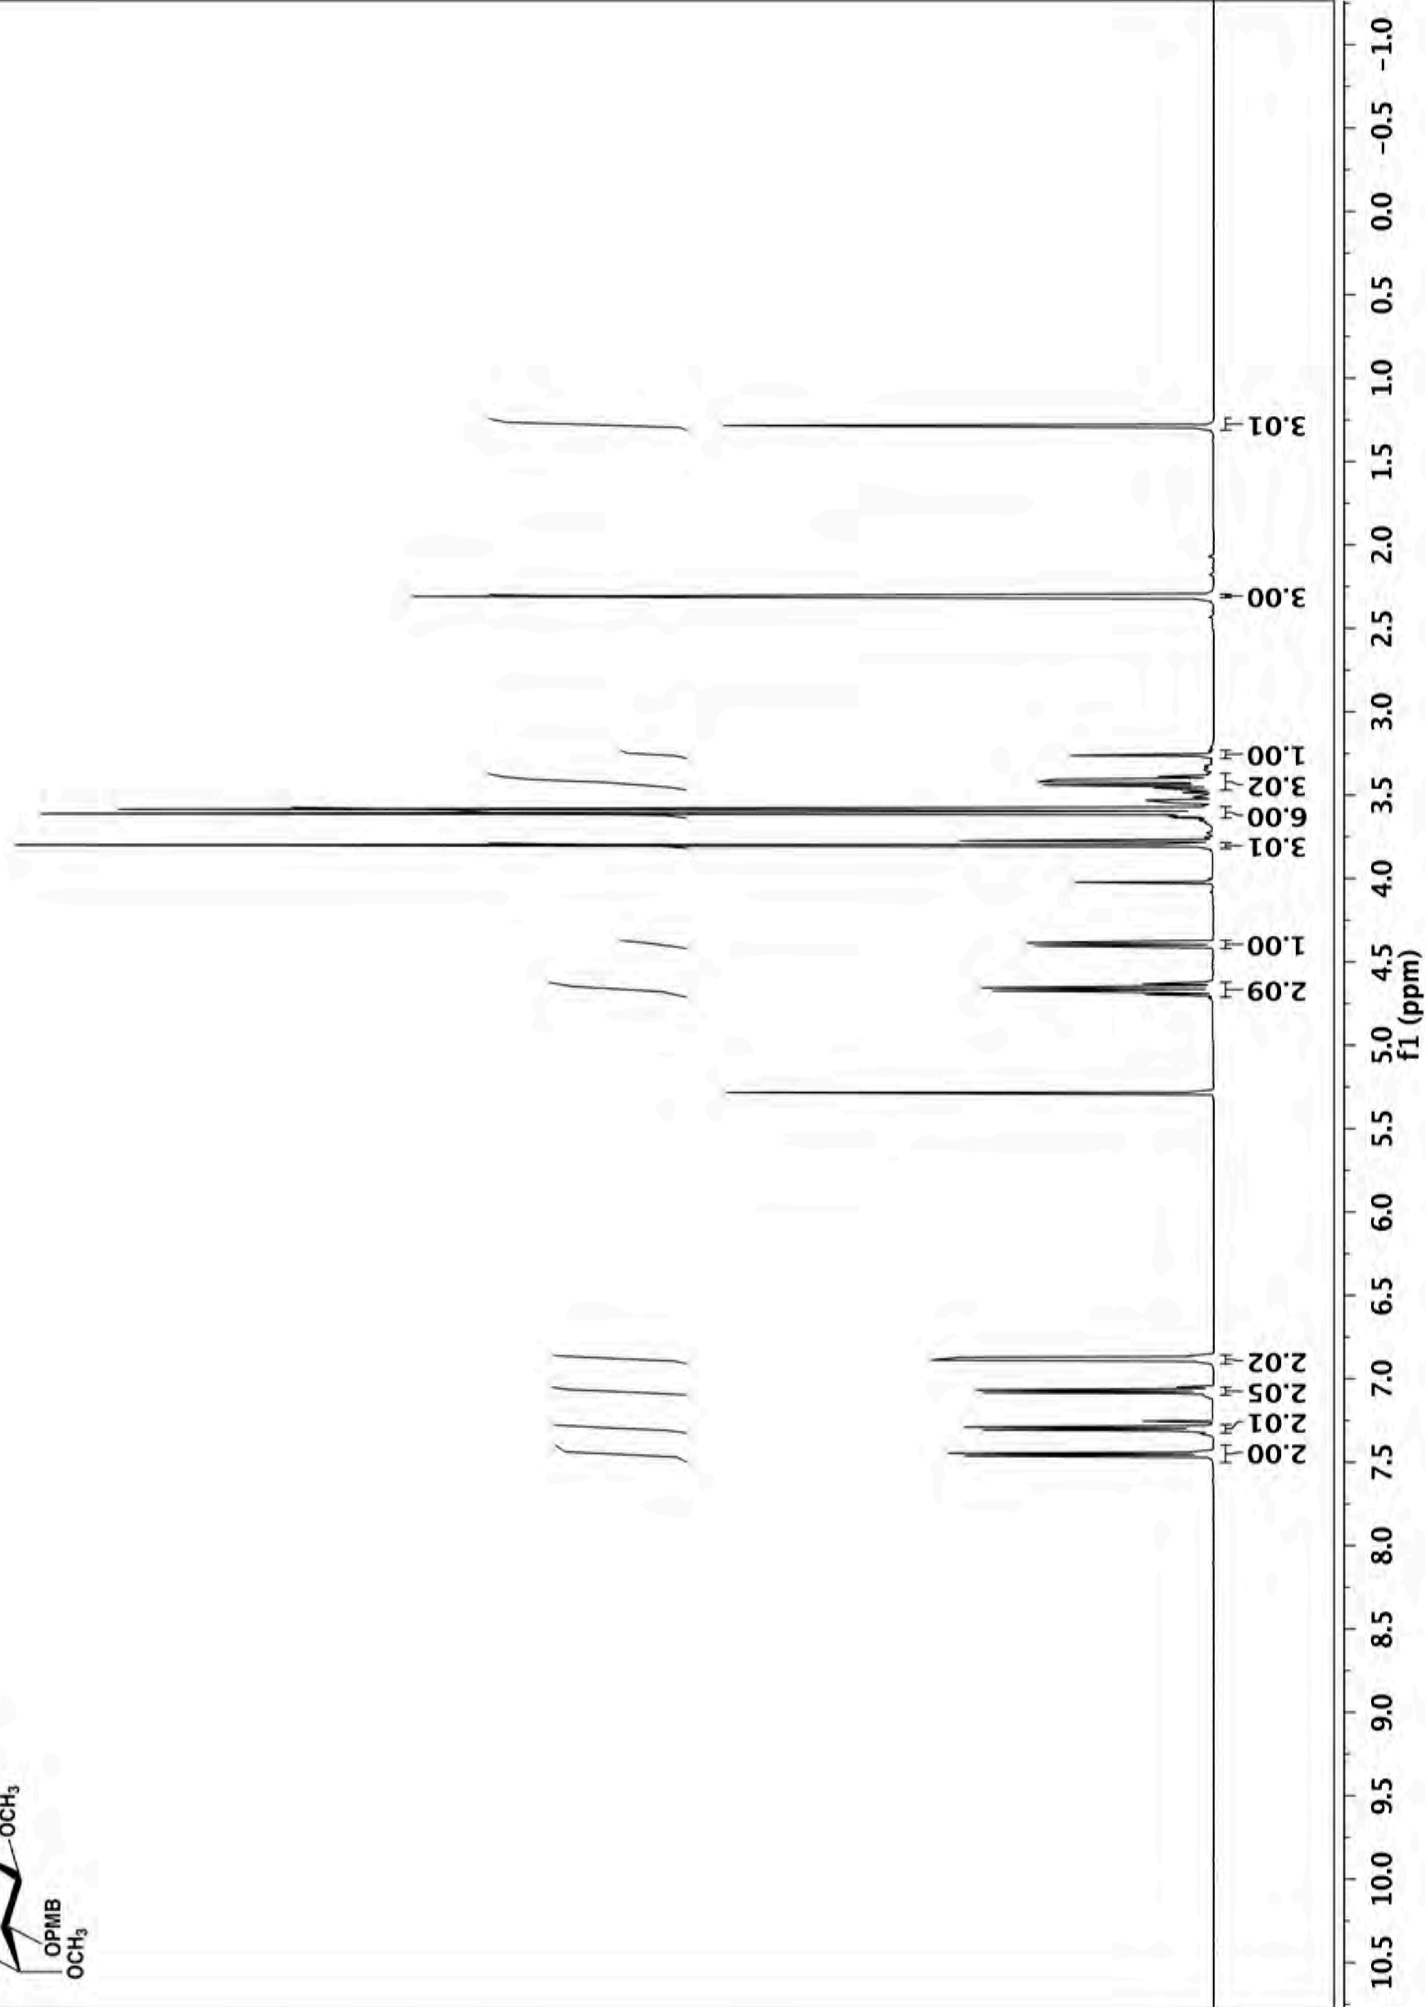

<sup>13</sup>C NMR of Compound S10

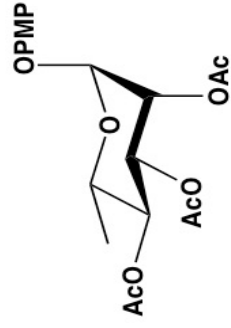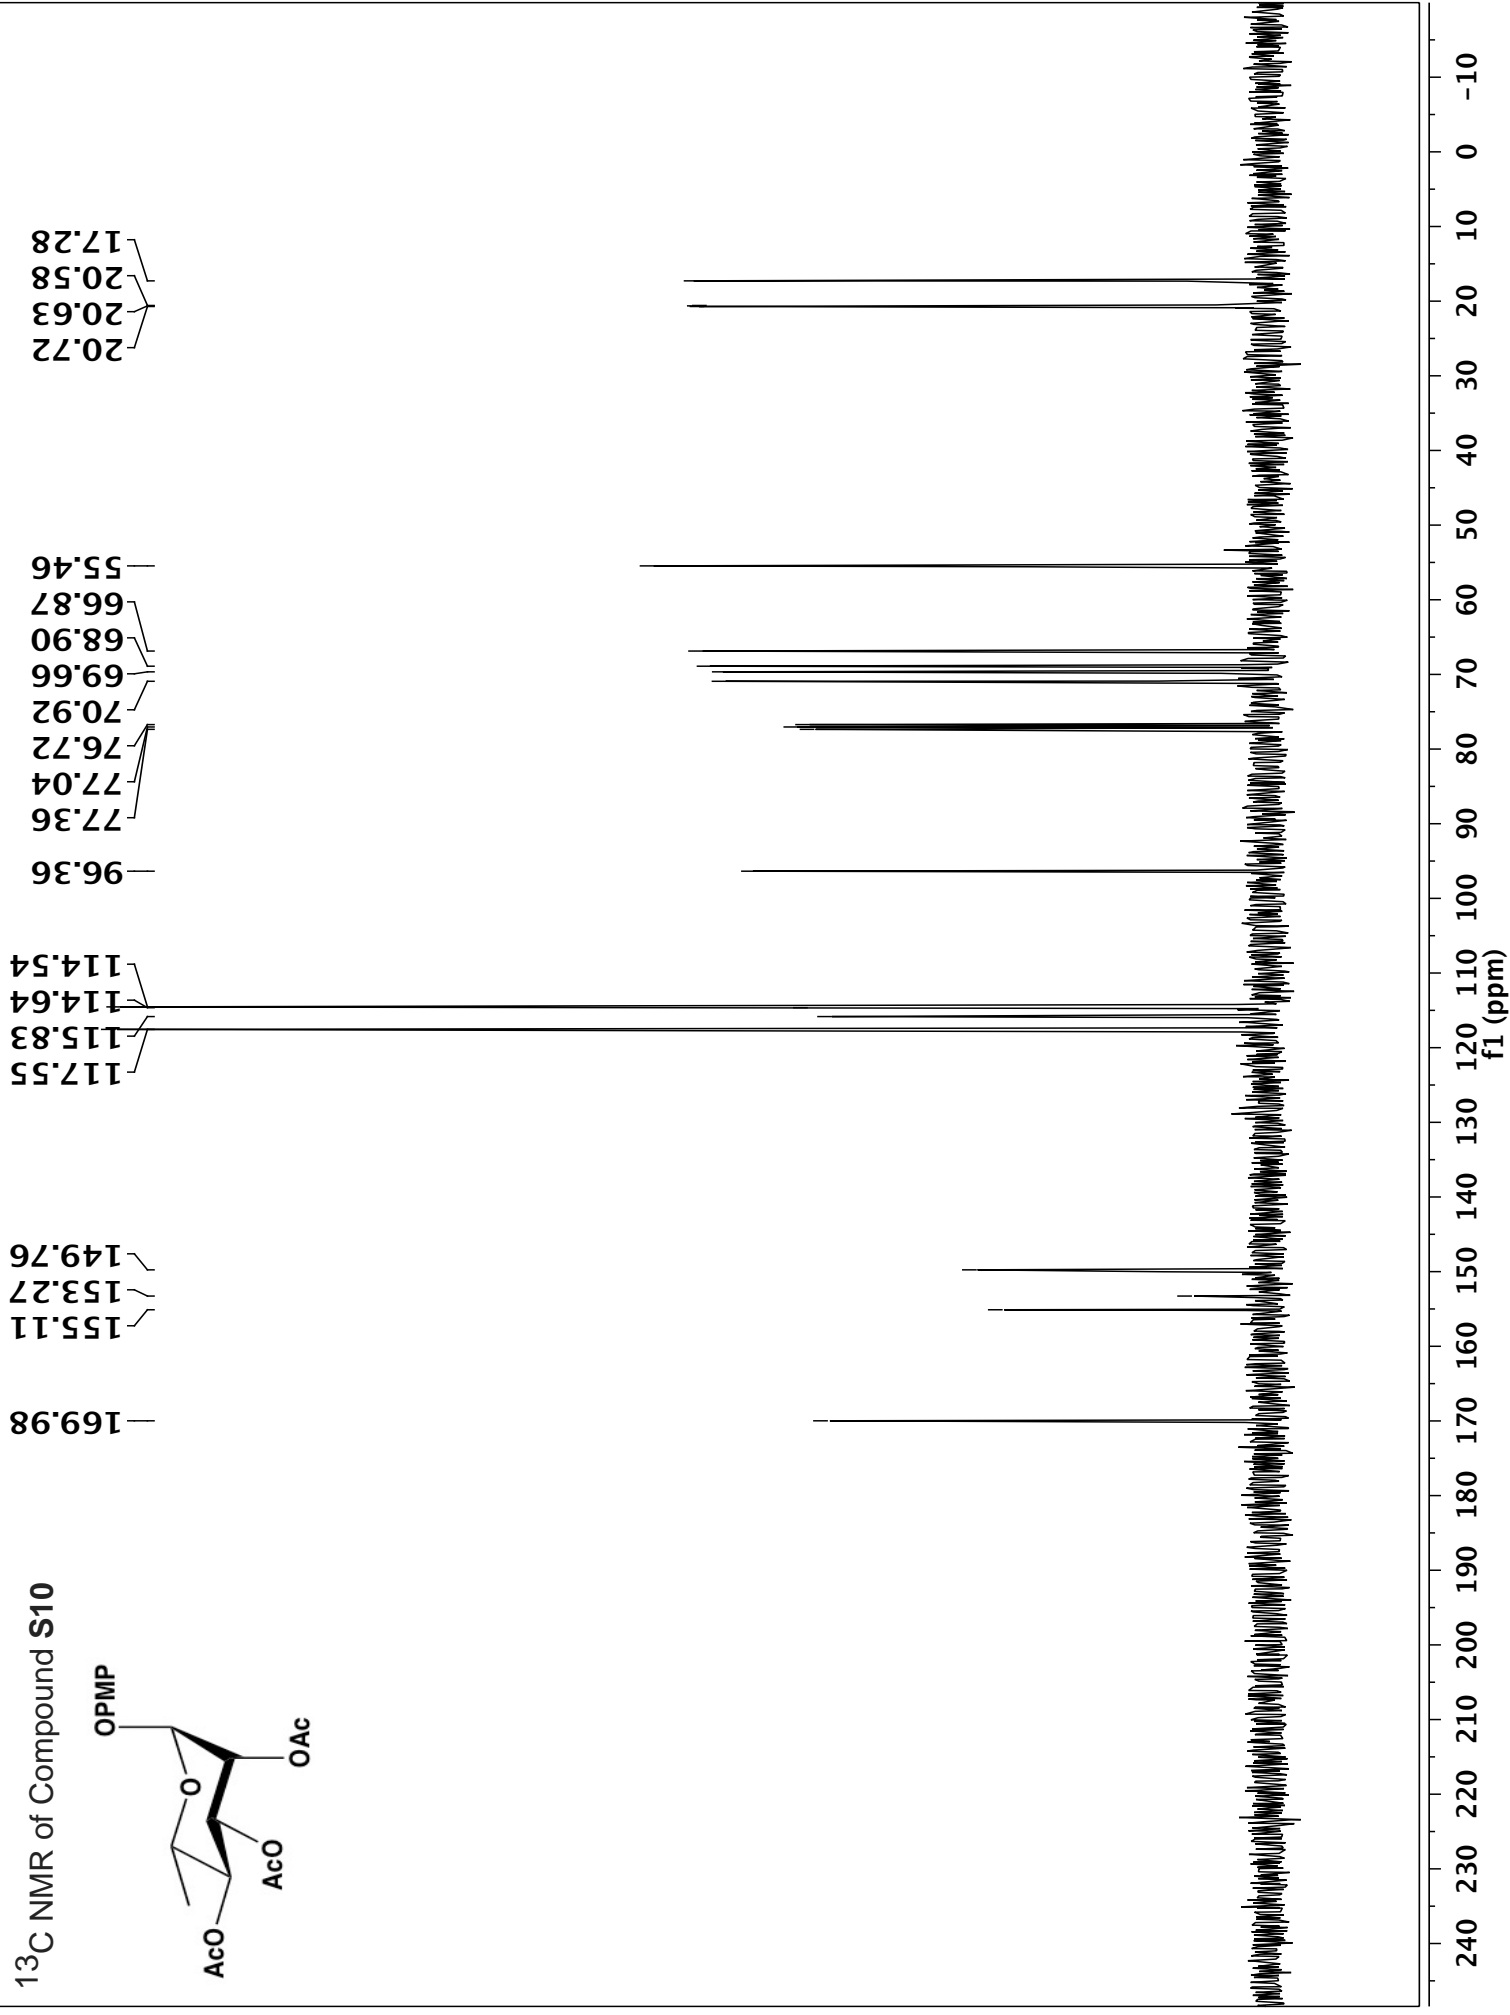

<sup>1</sup>H NMR of compound S10

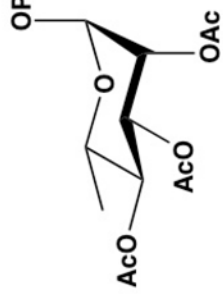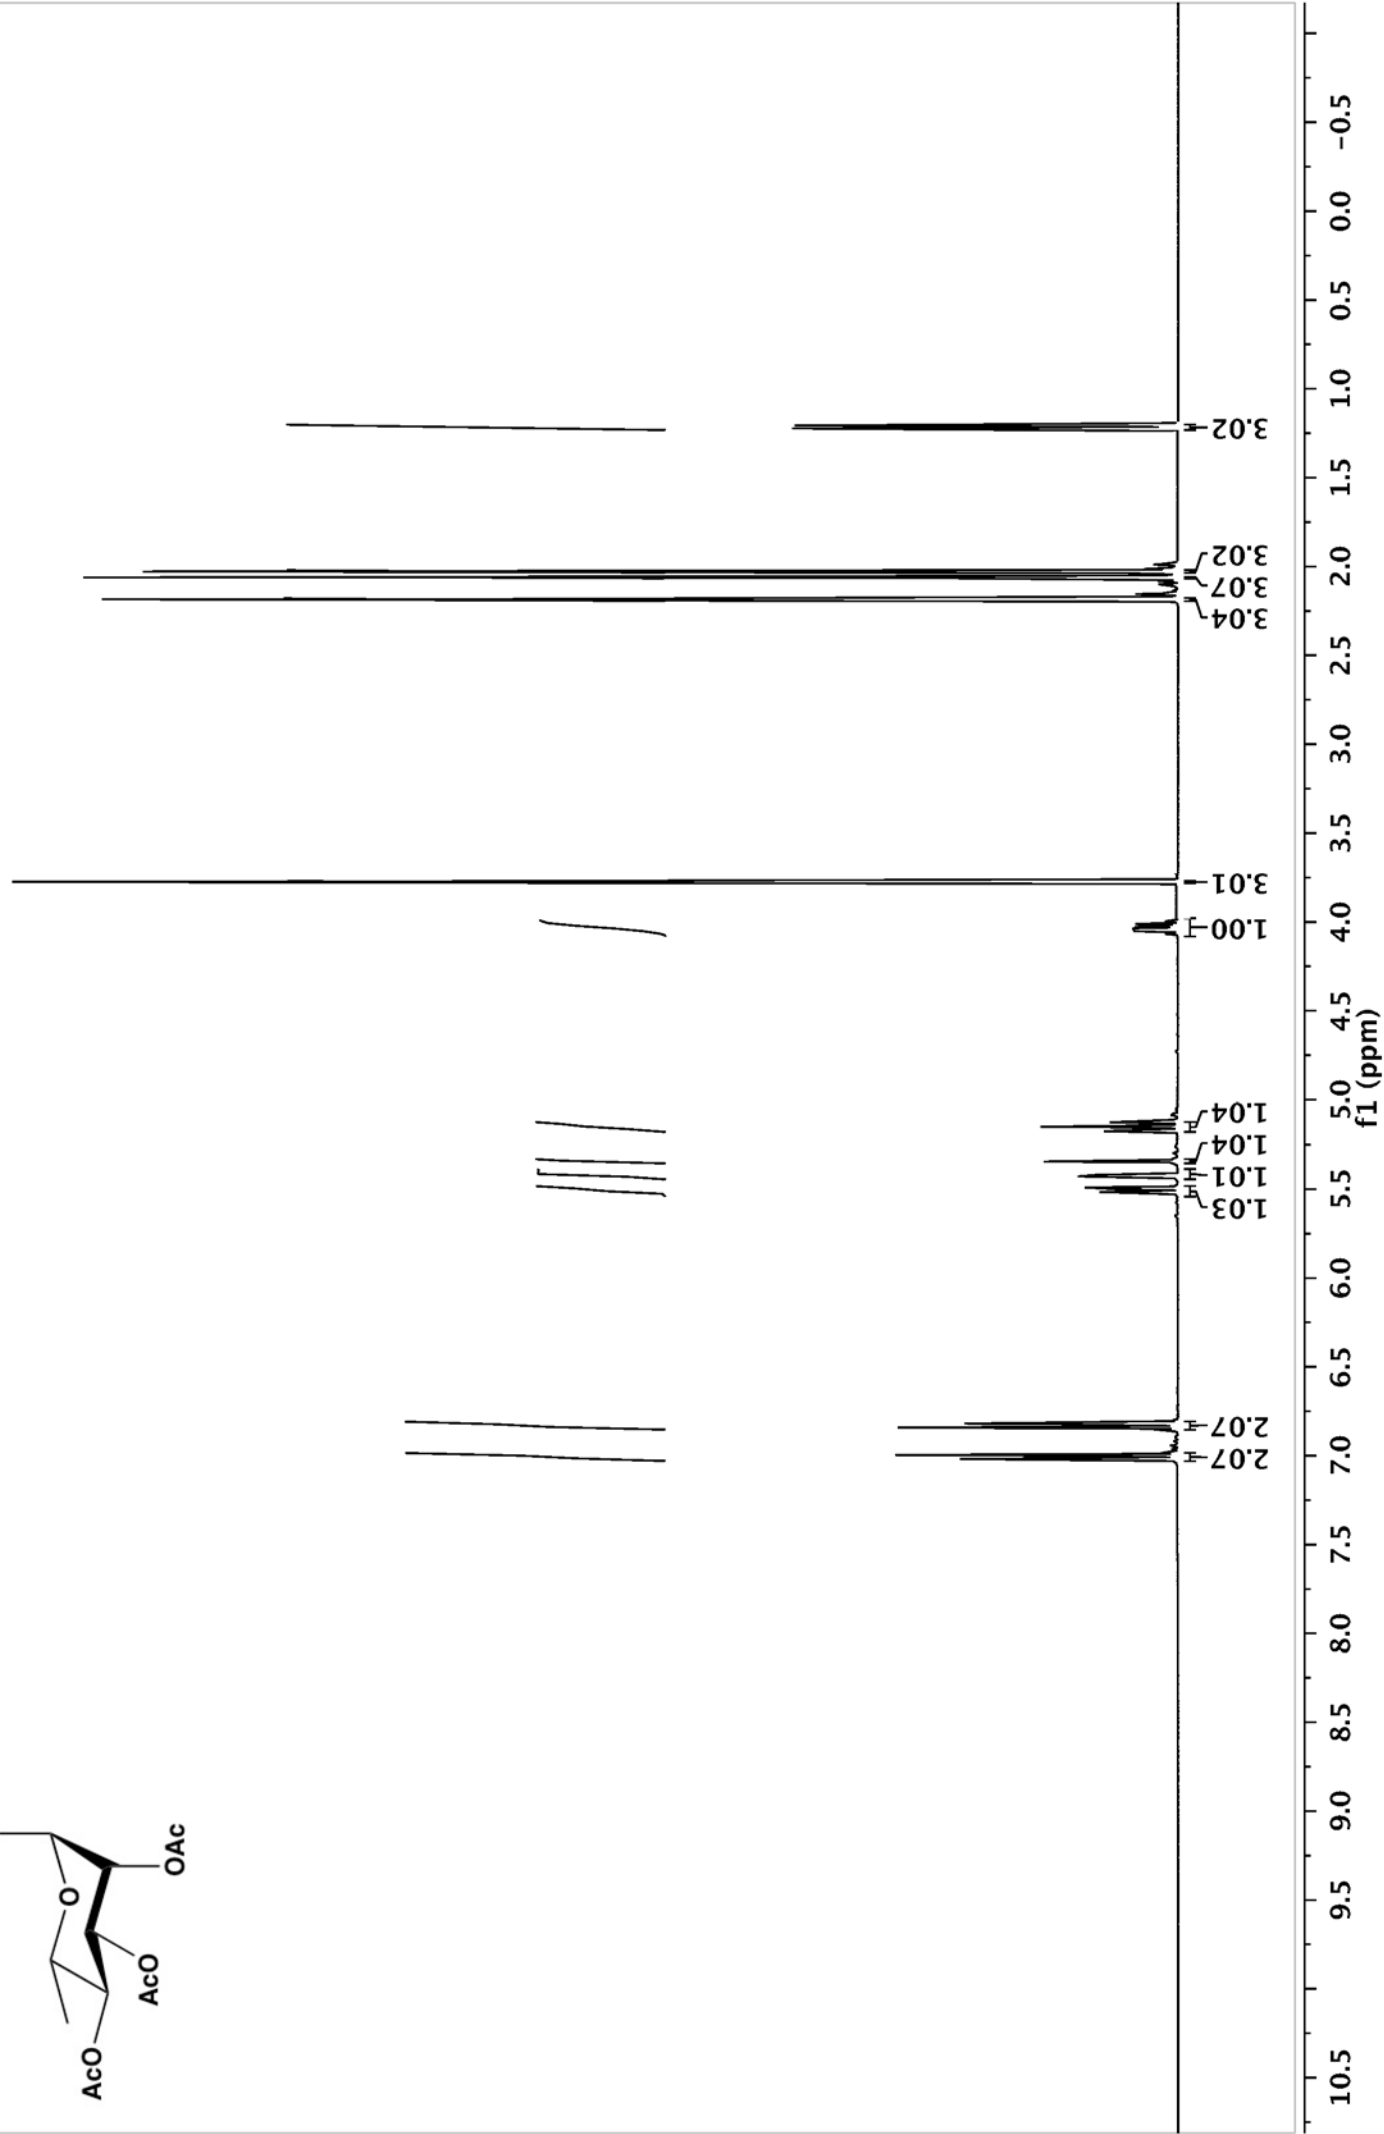

<sup>13</sup>C NMR of compound S11

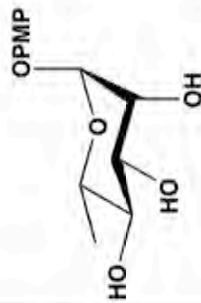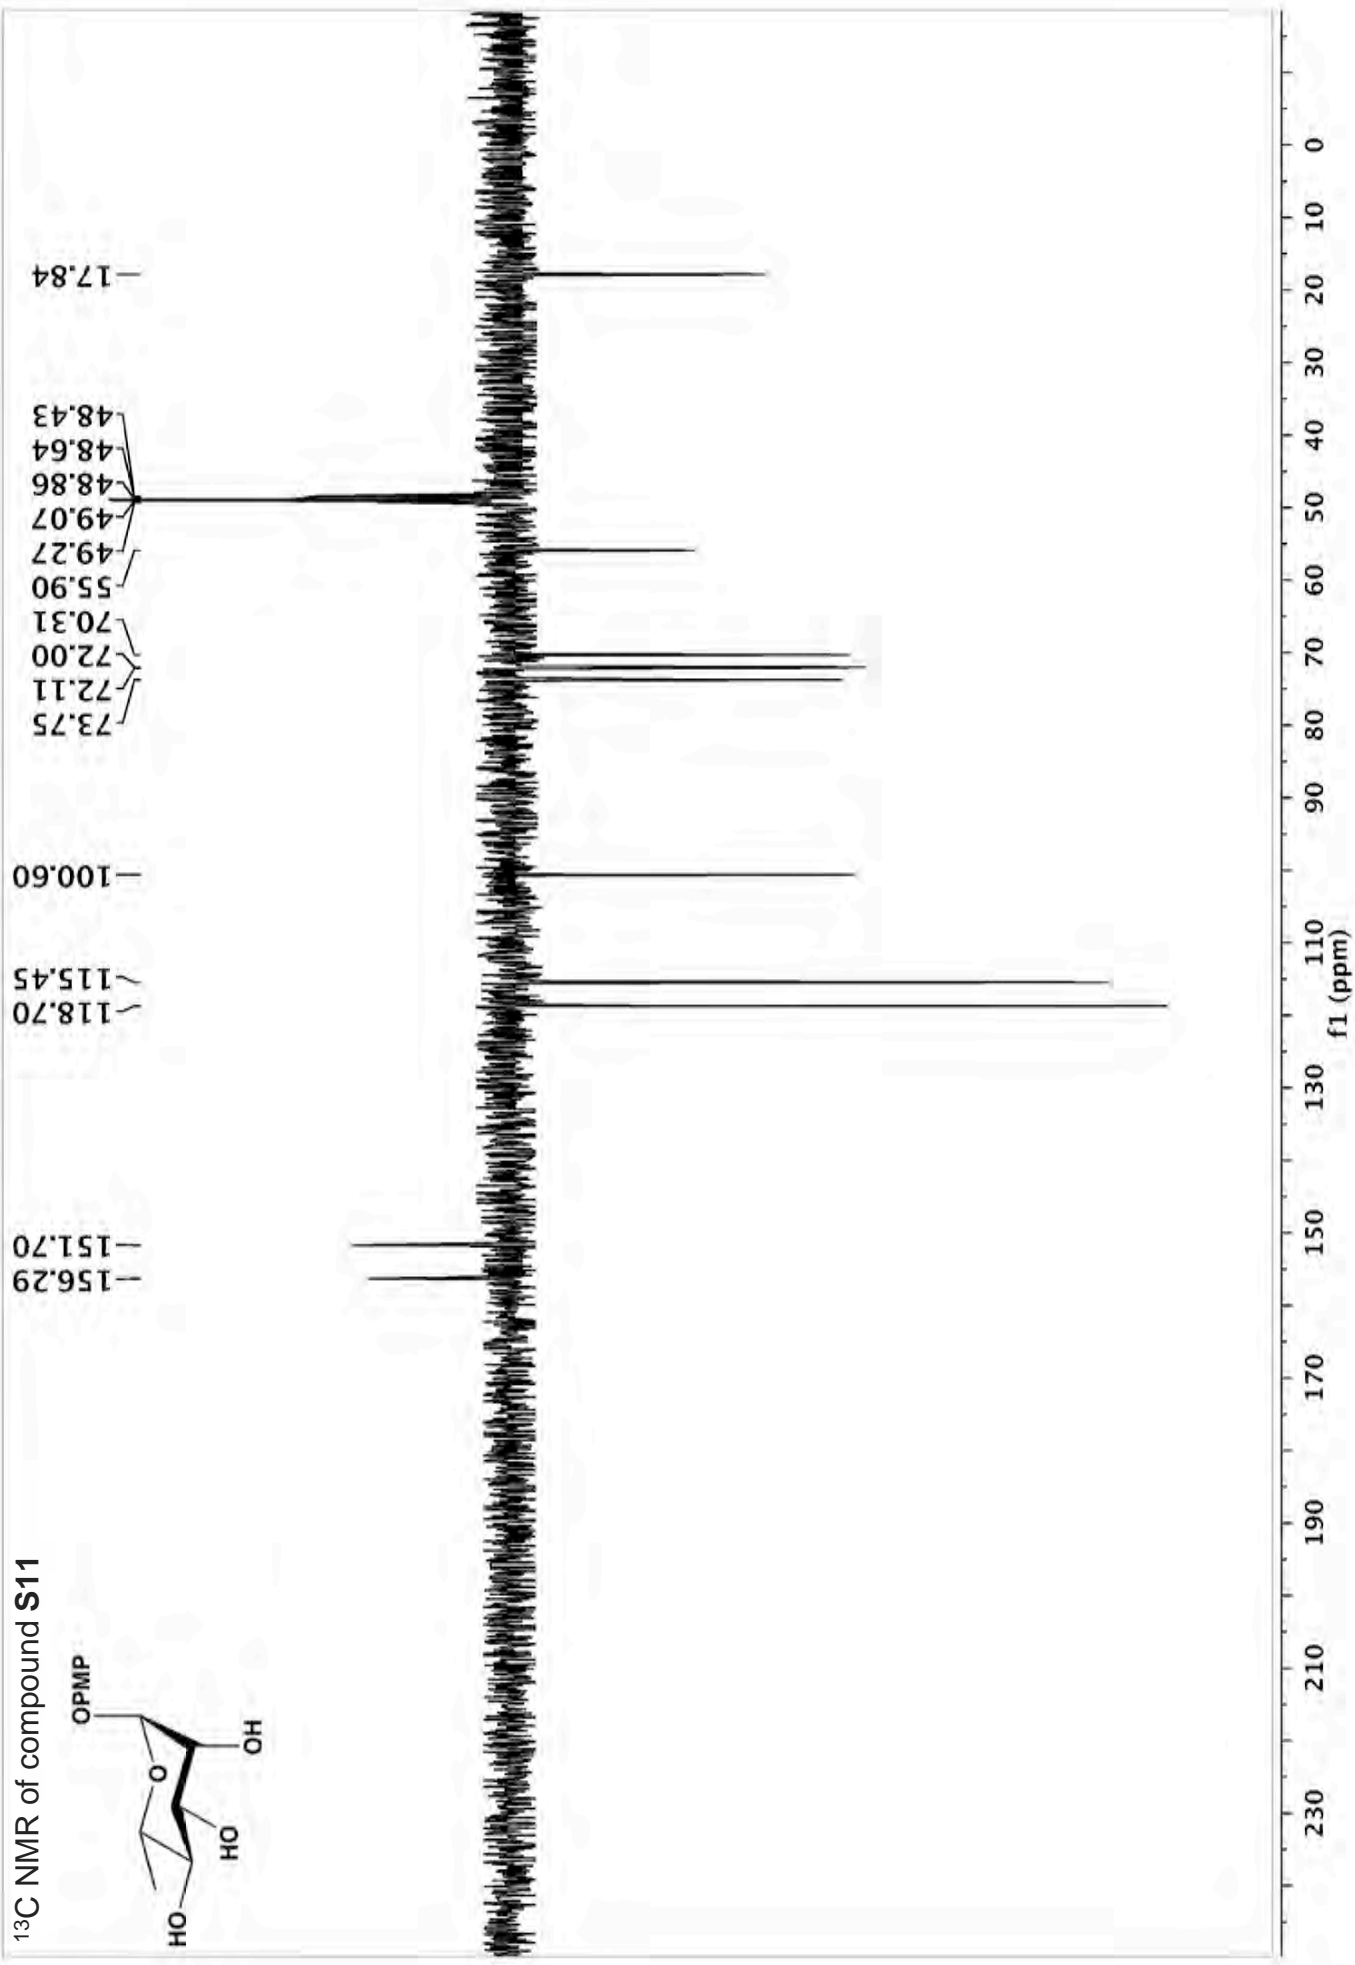



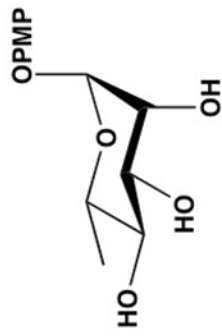

$^1\text{H}$  NMR of compound **S11**

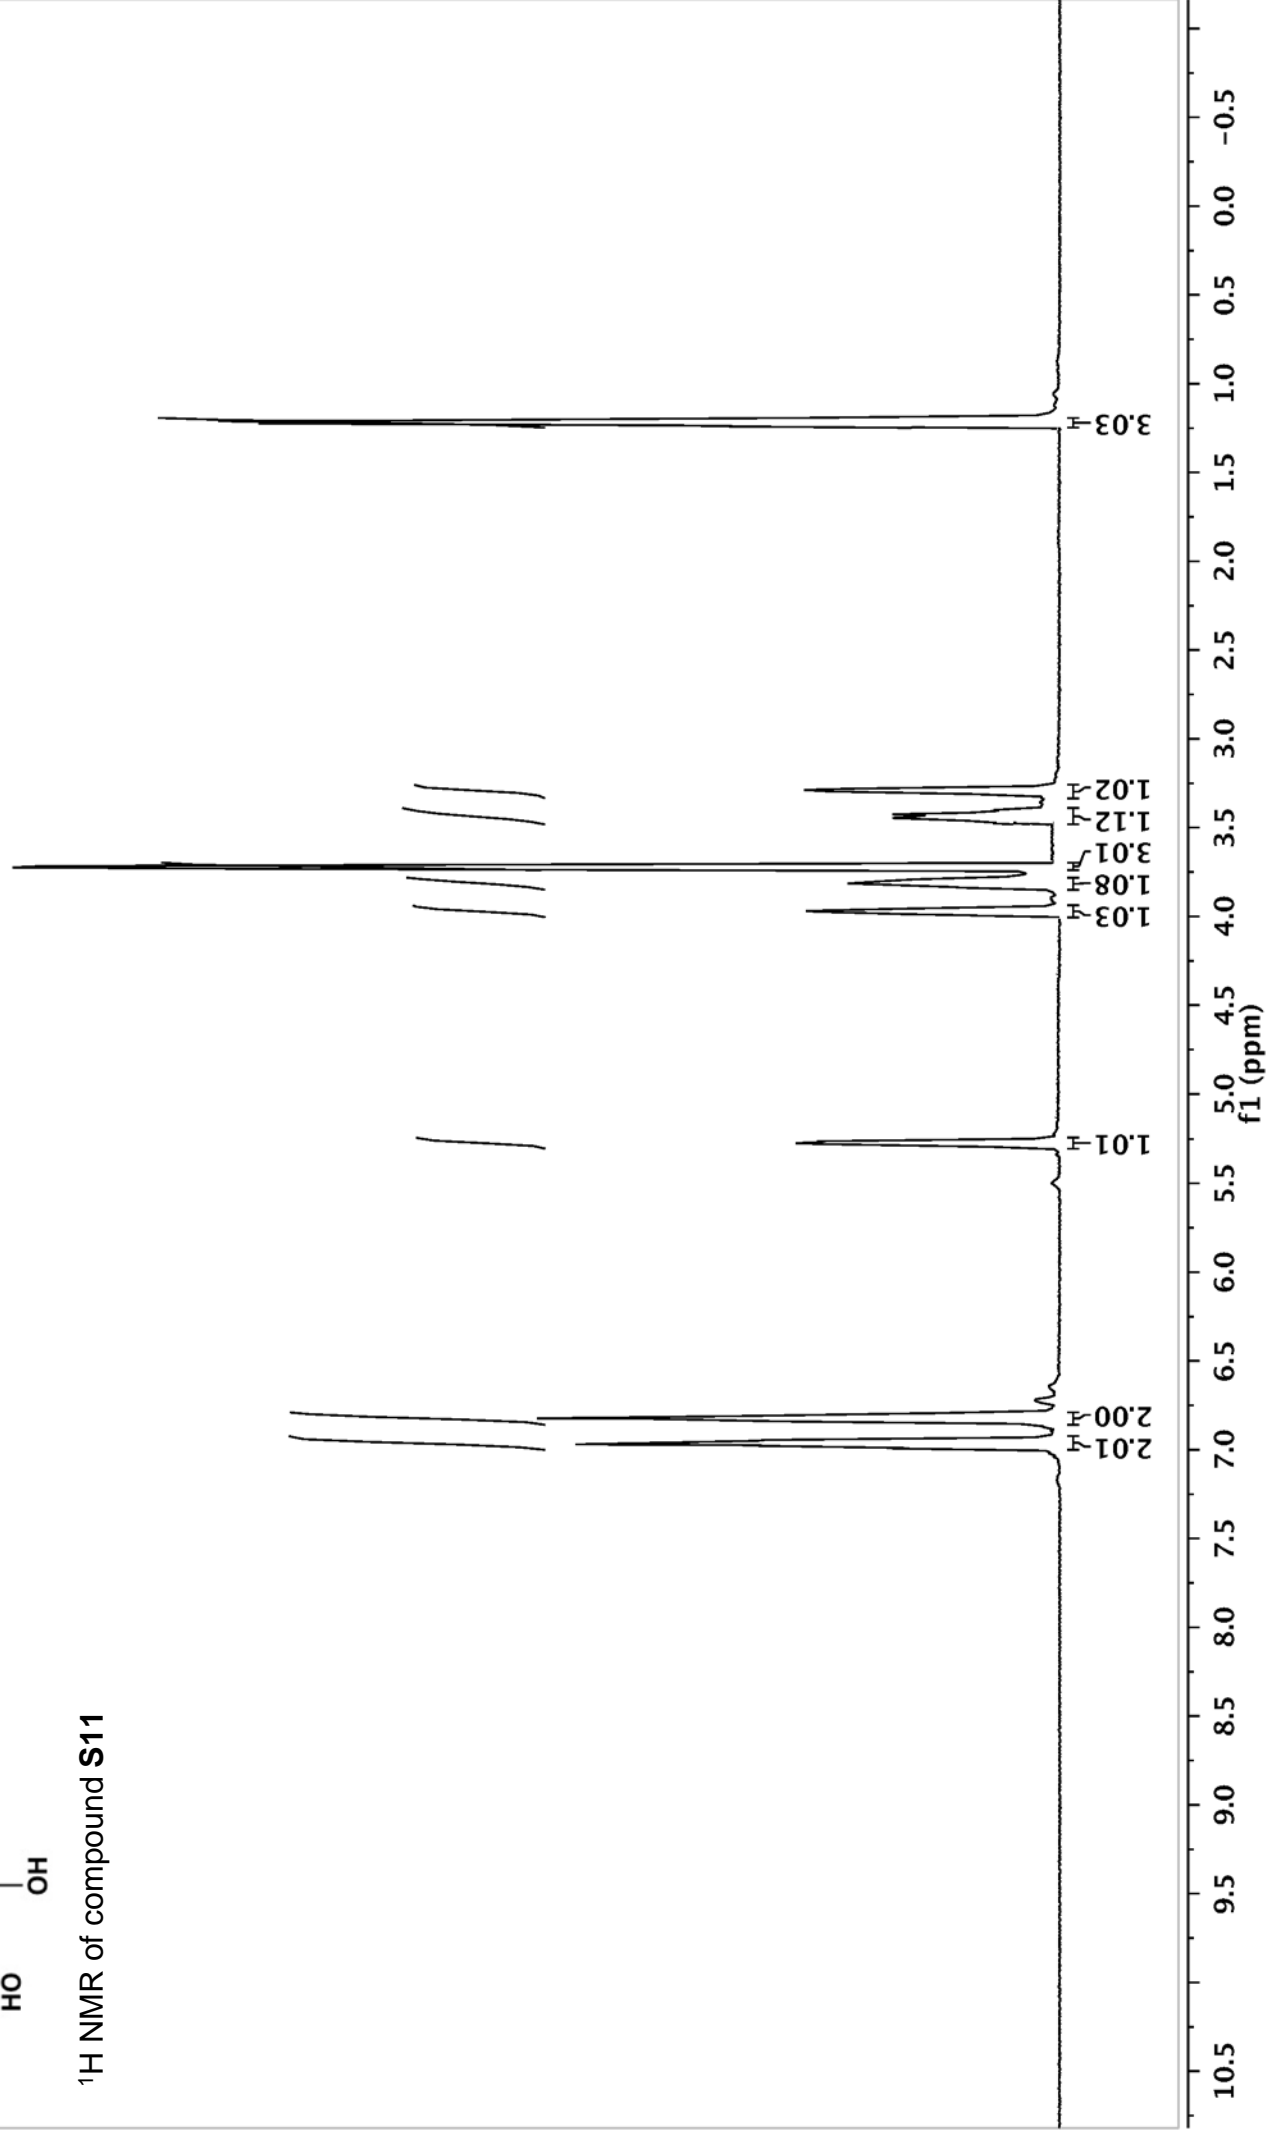

<sup>13</sup>C NMR of compound S12

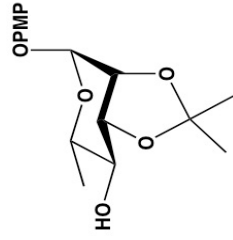

39.50 dmsol  
39.29 dmsol  
39.08 dmsol  
38.88 dmsol  
27.74  
26.05  
17.08

55.06

66.36  
73.00  
75.00  
77.77

95.71

108.17  
114.31  
118.13

149.26  
154.34

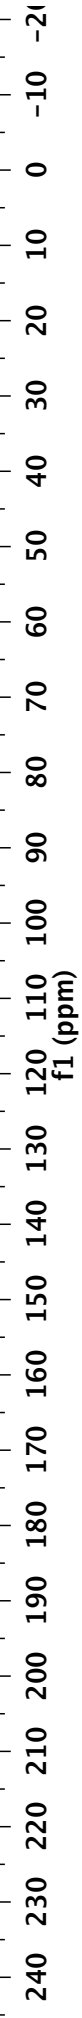

<sup>1</sup>H NMR of compound **S12**

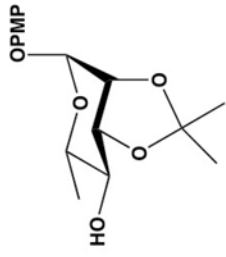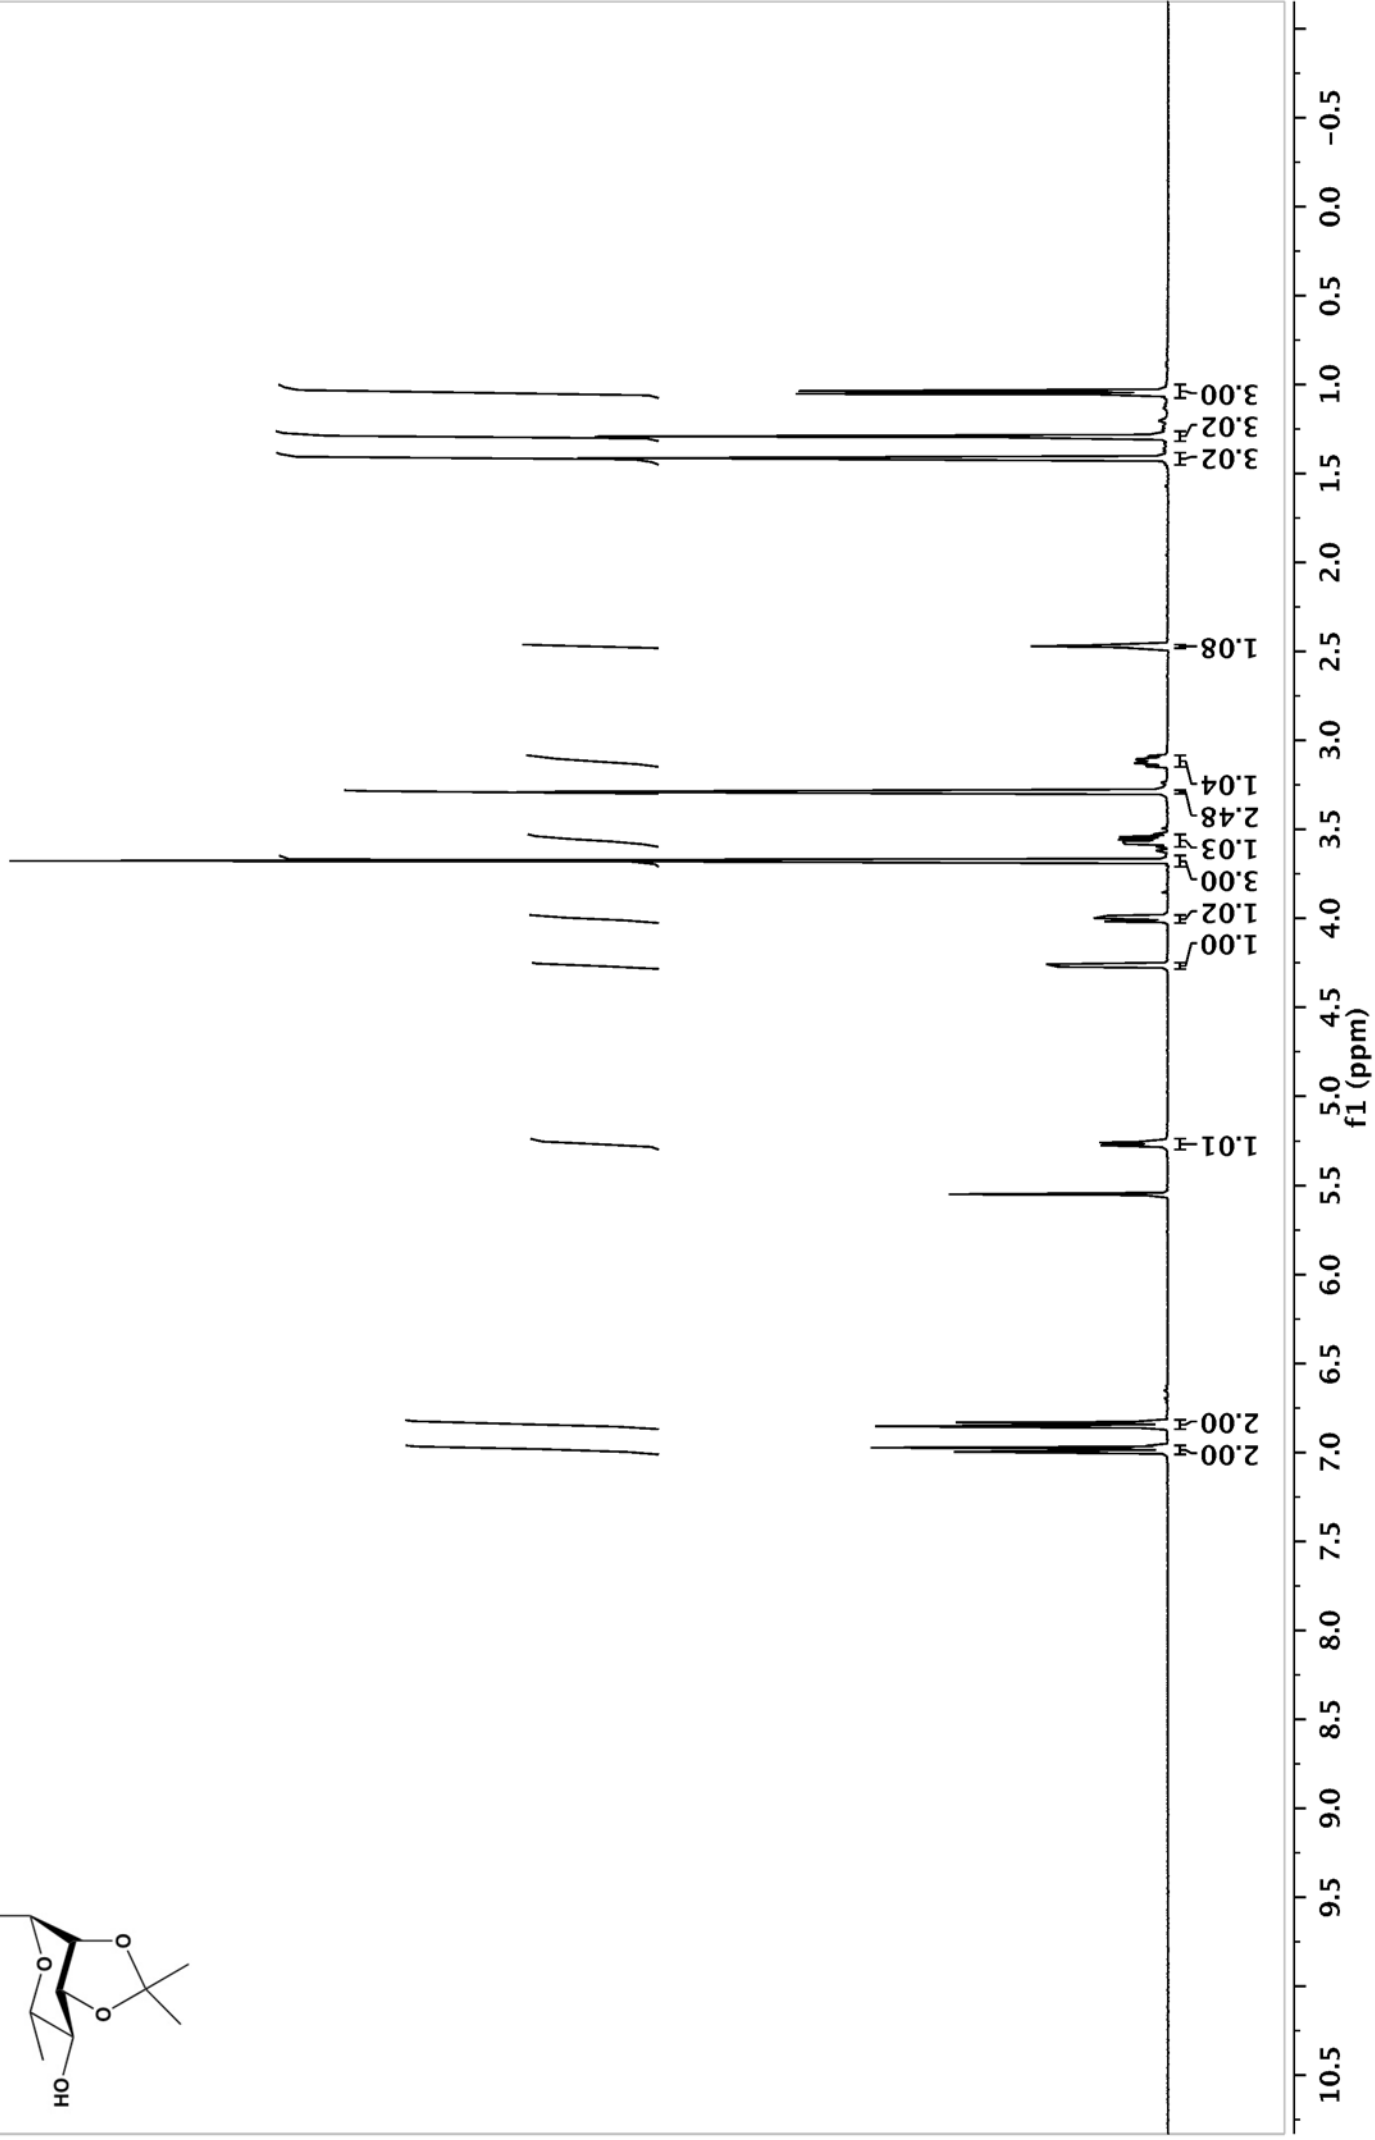

<sup>13</sup>C NMR of compound S13

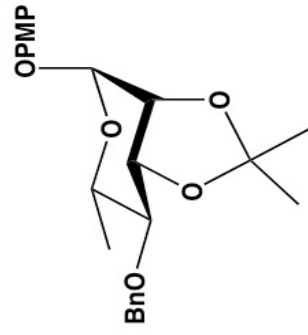

154.82  
150.07  
138.19  
128.92  
128.19  
127.90  
127.62  
117.62  
114.52  
109.35  
96.09  
80.96  
78.54  
77.24  
76.92  
76.60  
75.95  
65.30  
55.33  
27.90  
26.32  
17.74

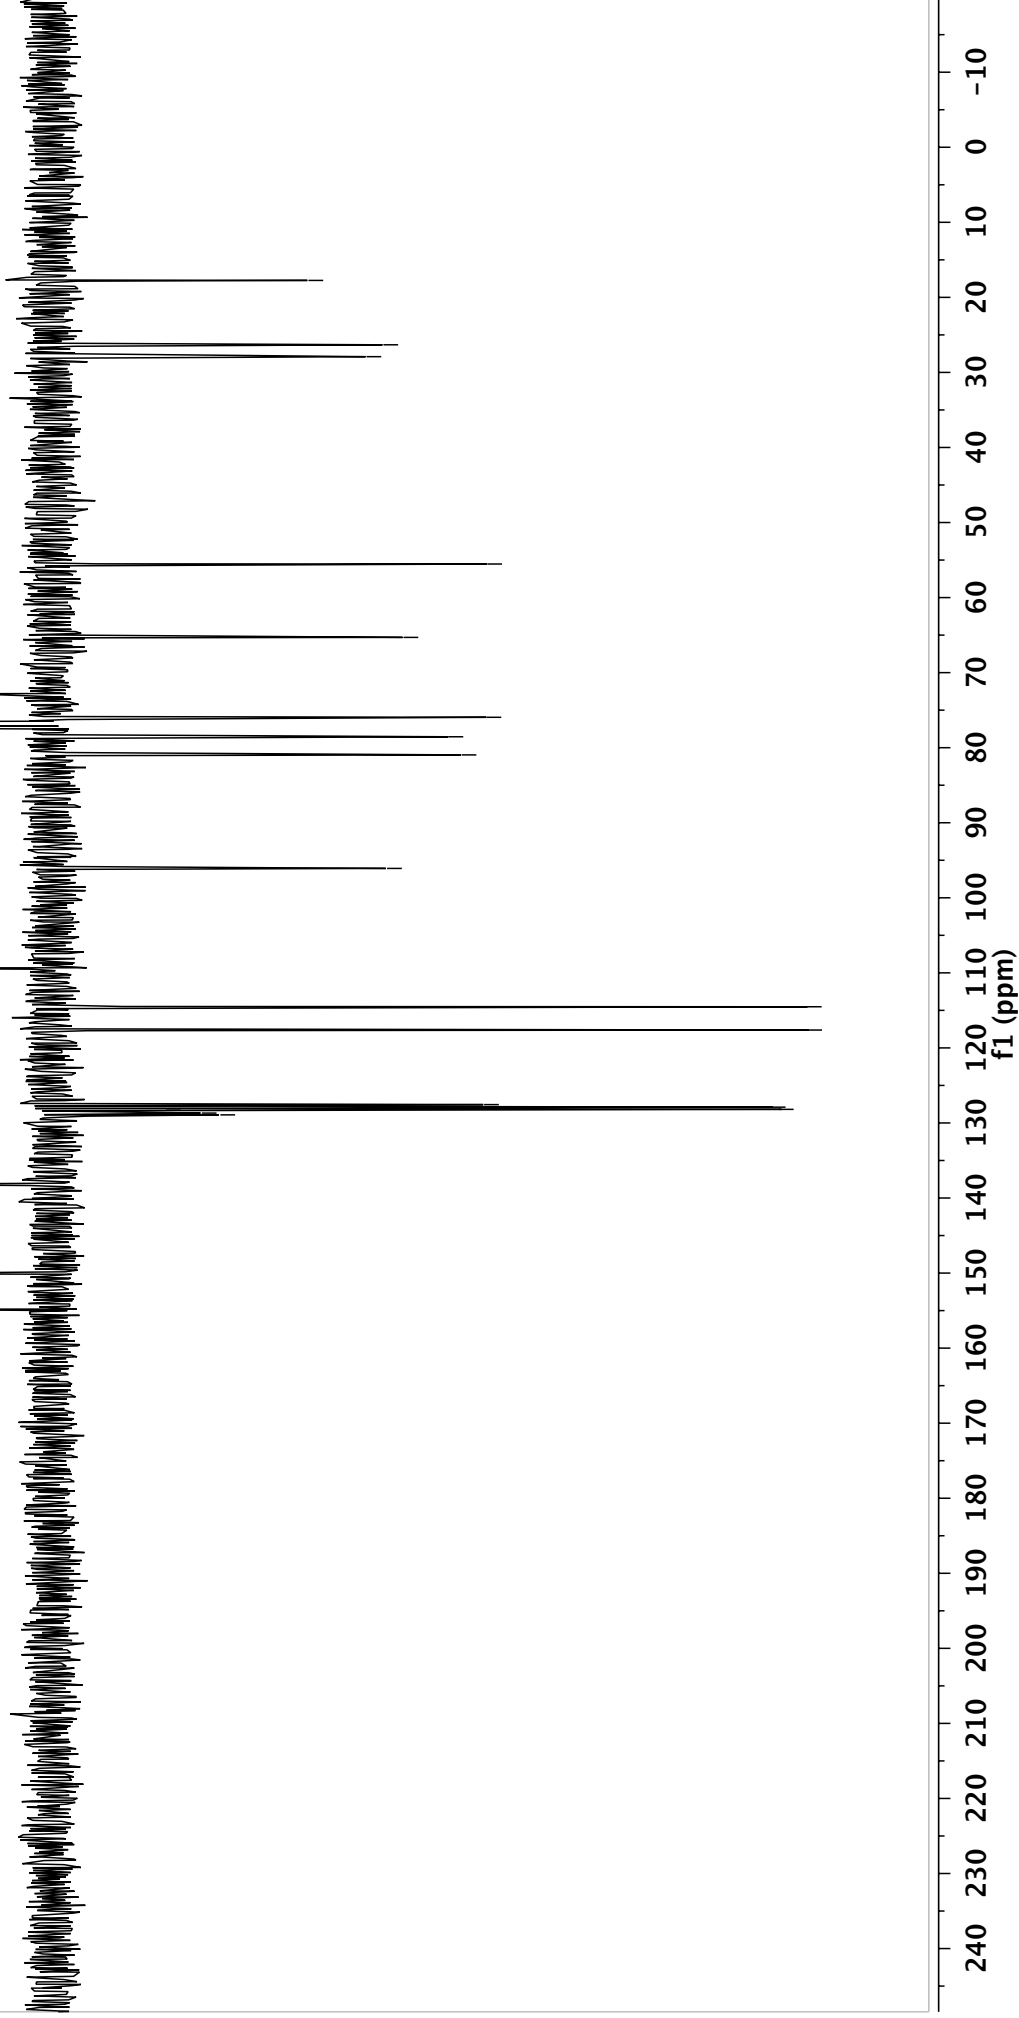

<sup>1</sup>H NMR of compound **S13**

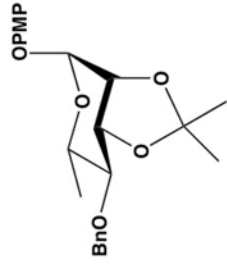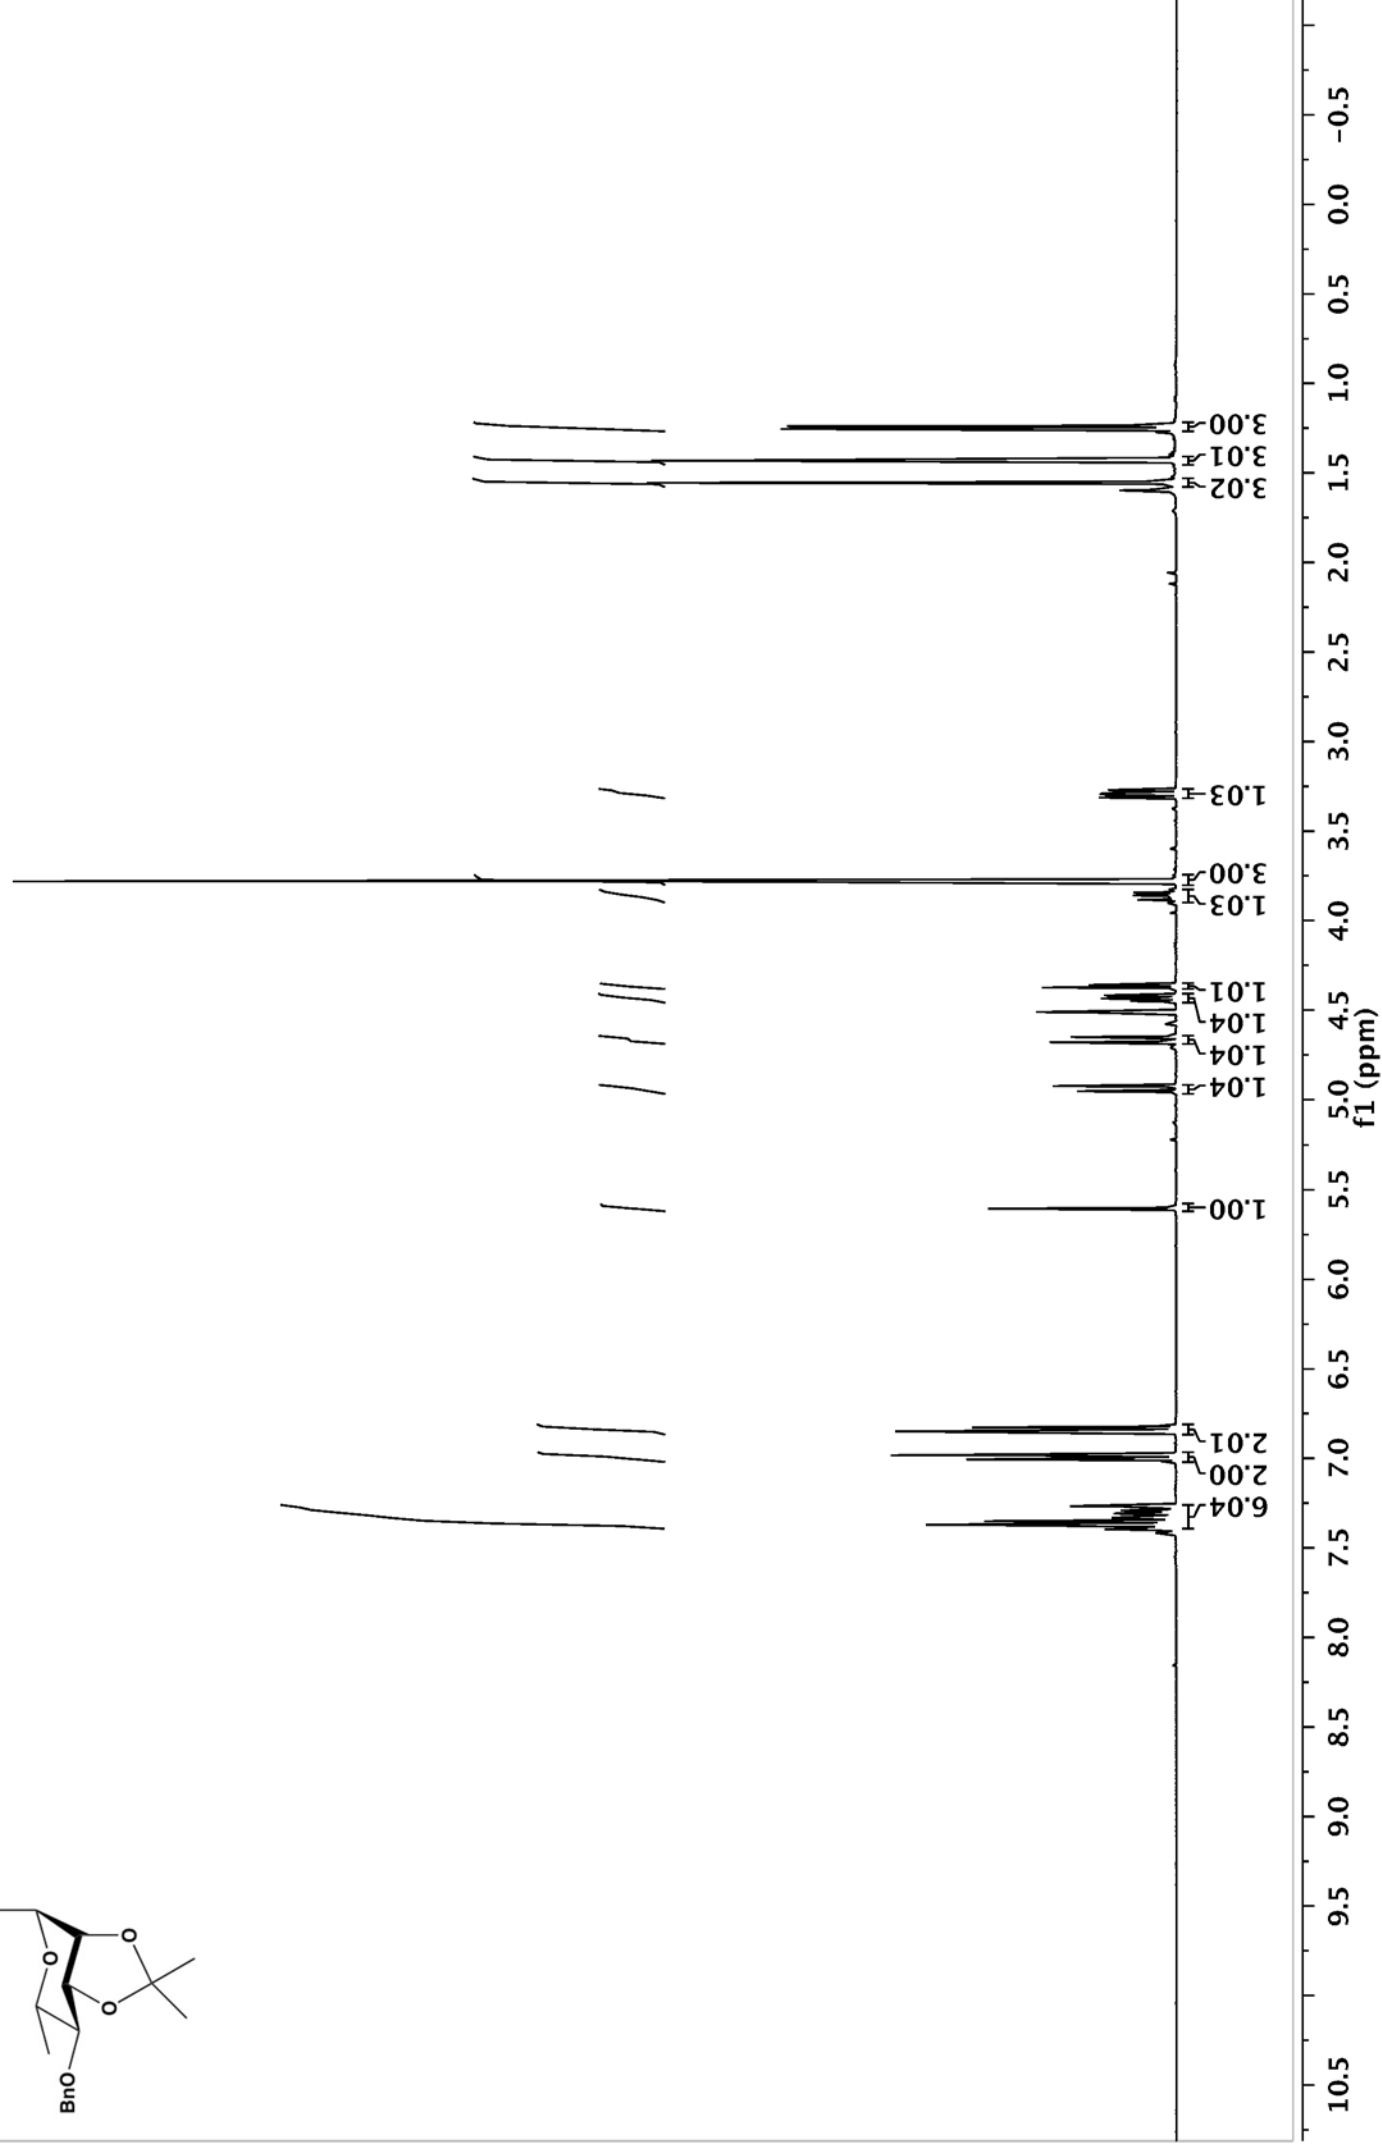

<sup>13</sup>C NMR of compound S14

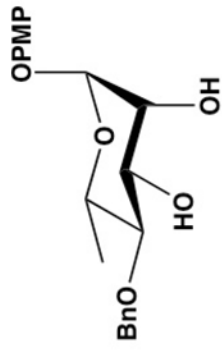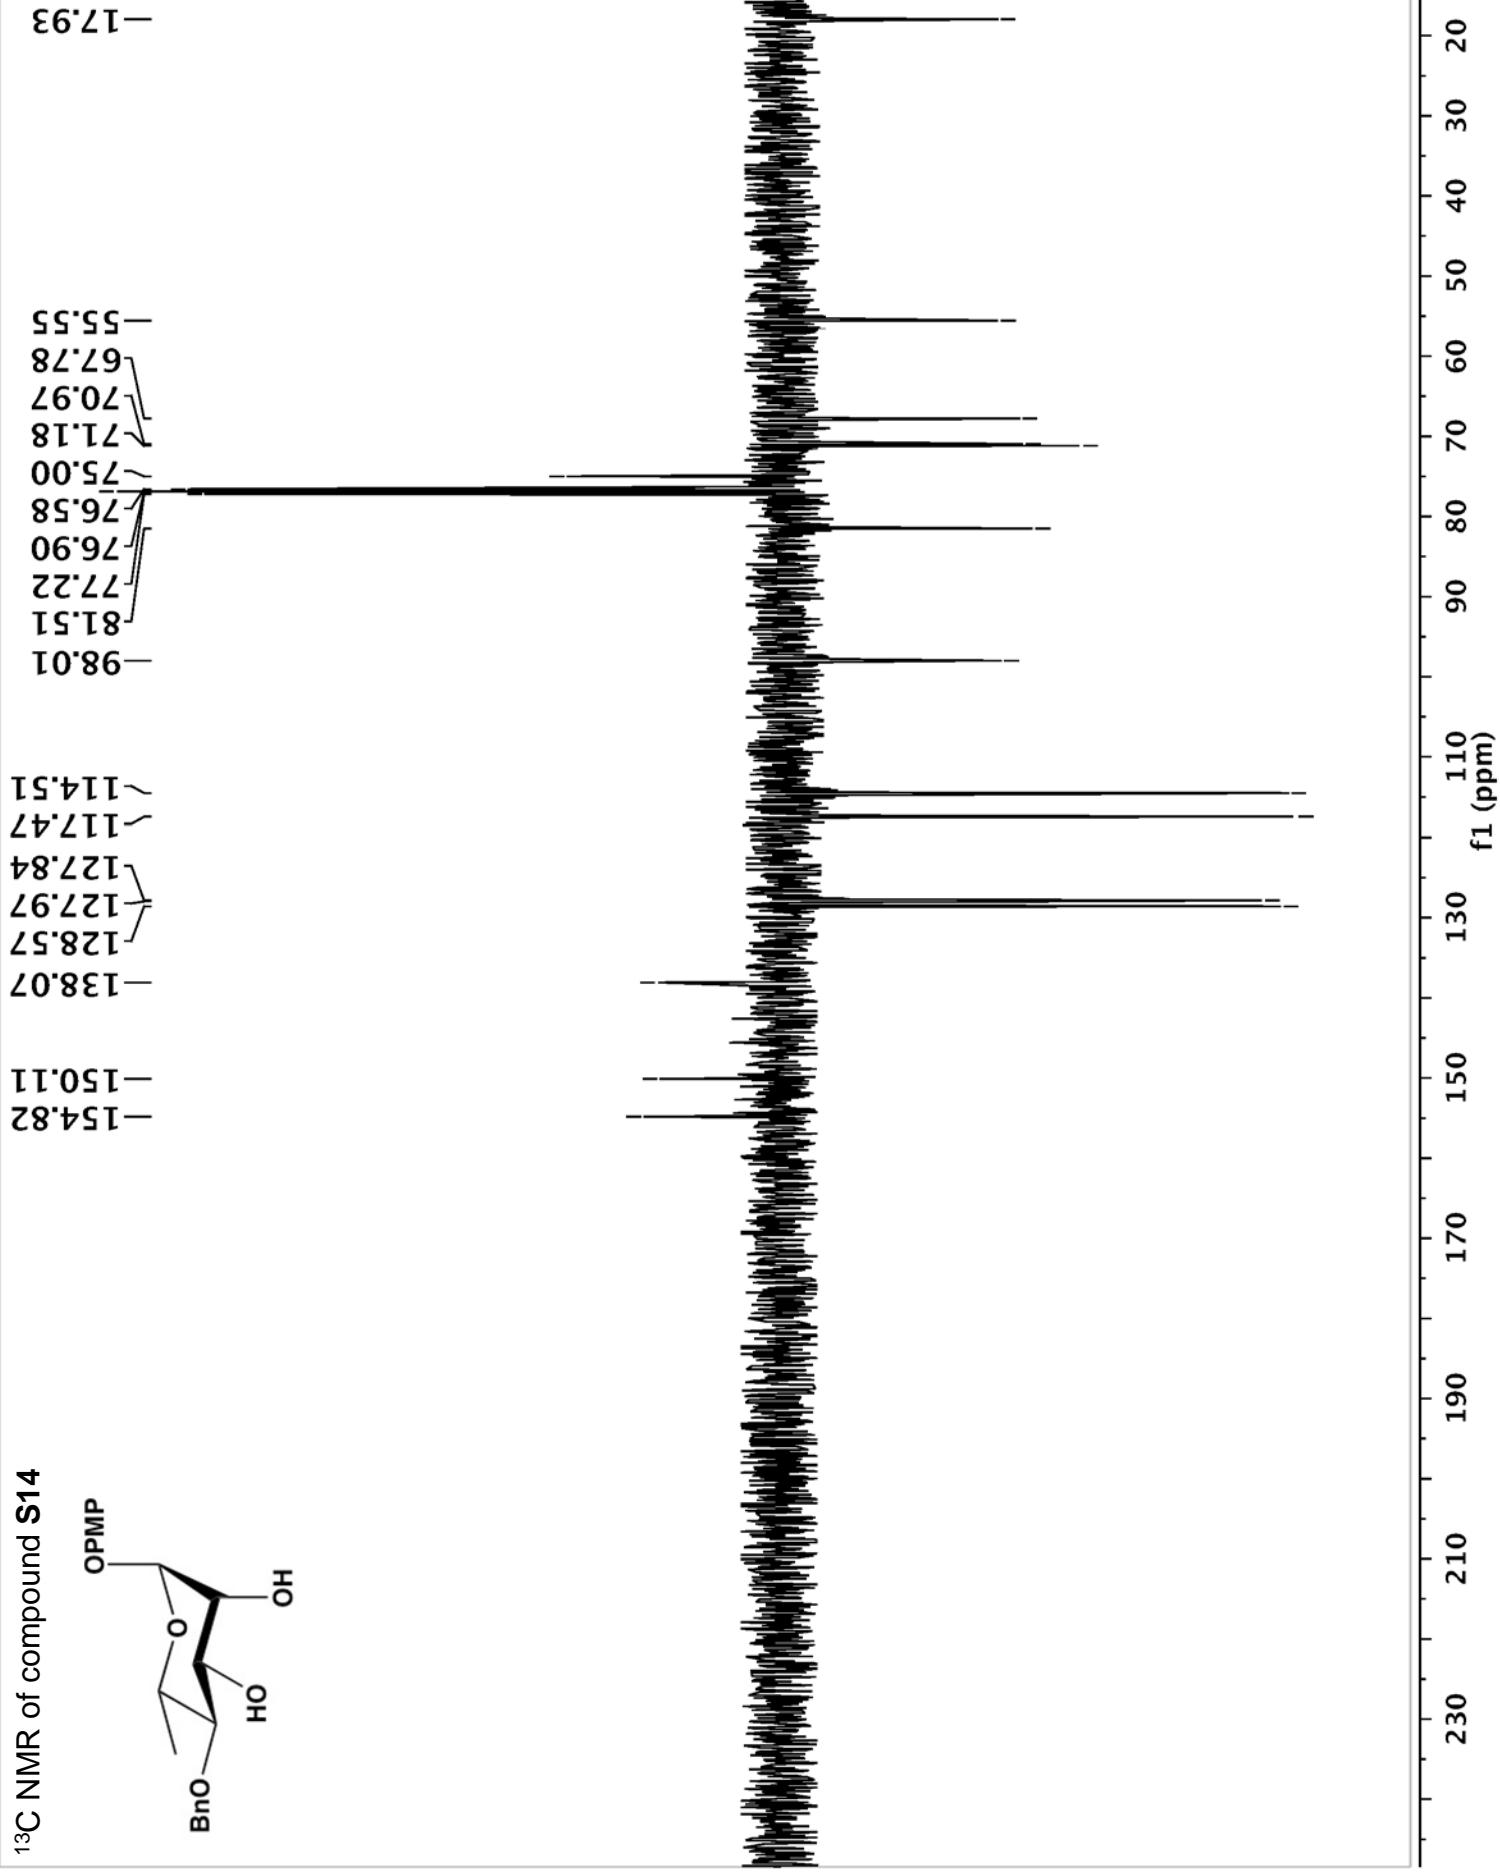

<sup>1</sup>H NMR of compound S14

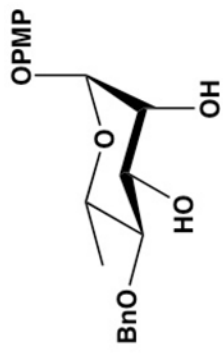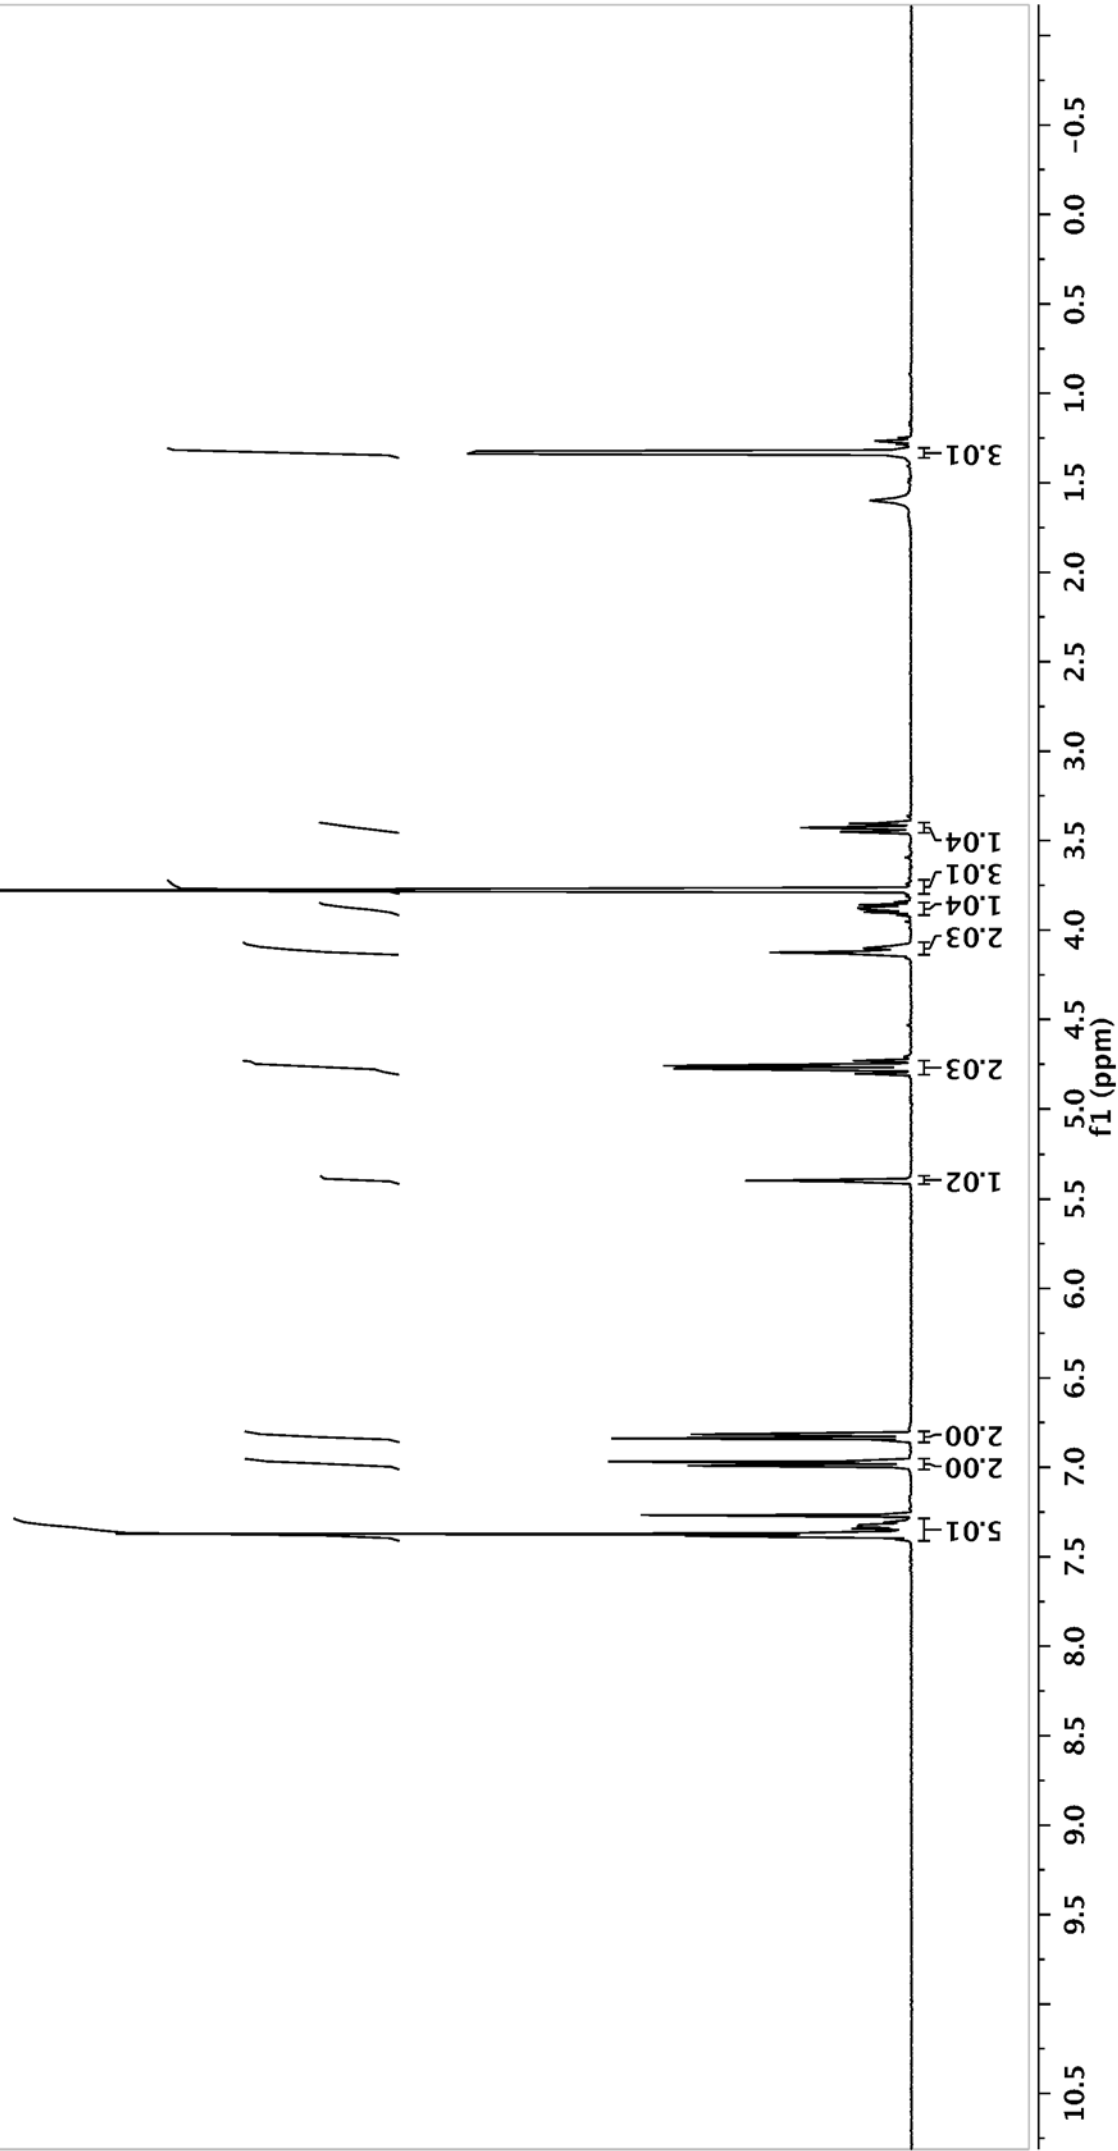

<sup>13</sup>C NMR of compound S15

OPMP

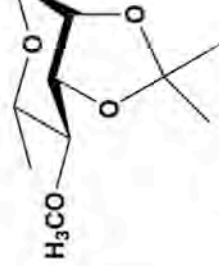

155.16  
150.45  
117.96  
114.85  
109.61  
96.47  
83.76  
78.53  
77.57  
76.94  
76.25  
65.73  
59.71  
55.86  
28.27  
26.60  
17.96

f1 (ppm)

230 210 190 170 150 130 110 90 70 50 30 20 10 0



<sup>1</sup>H NMR of compound S15

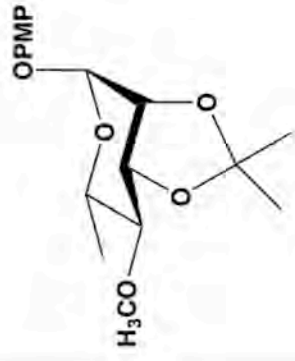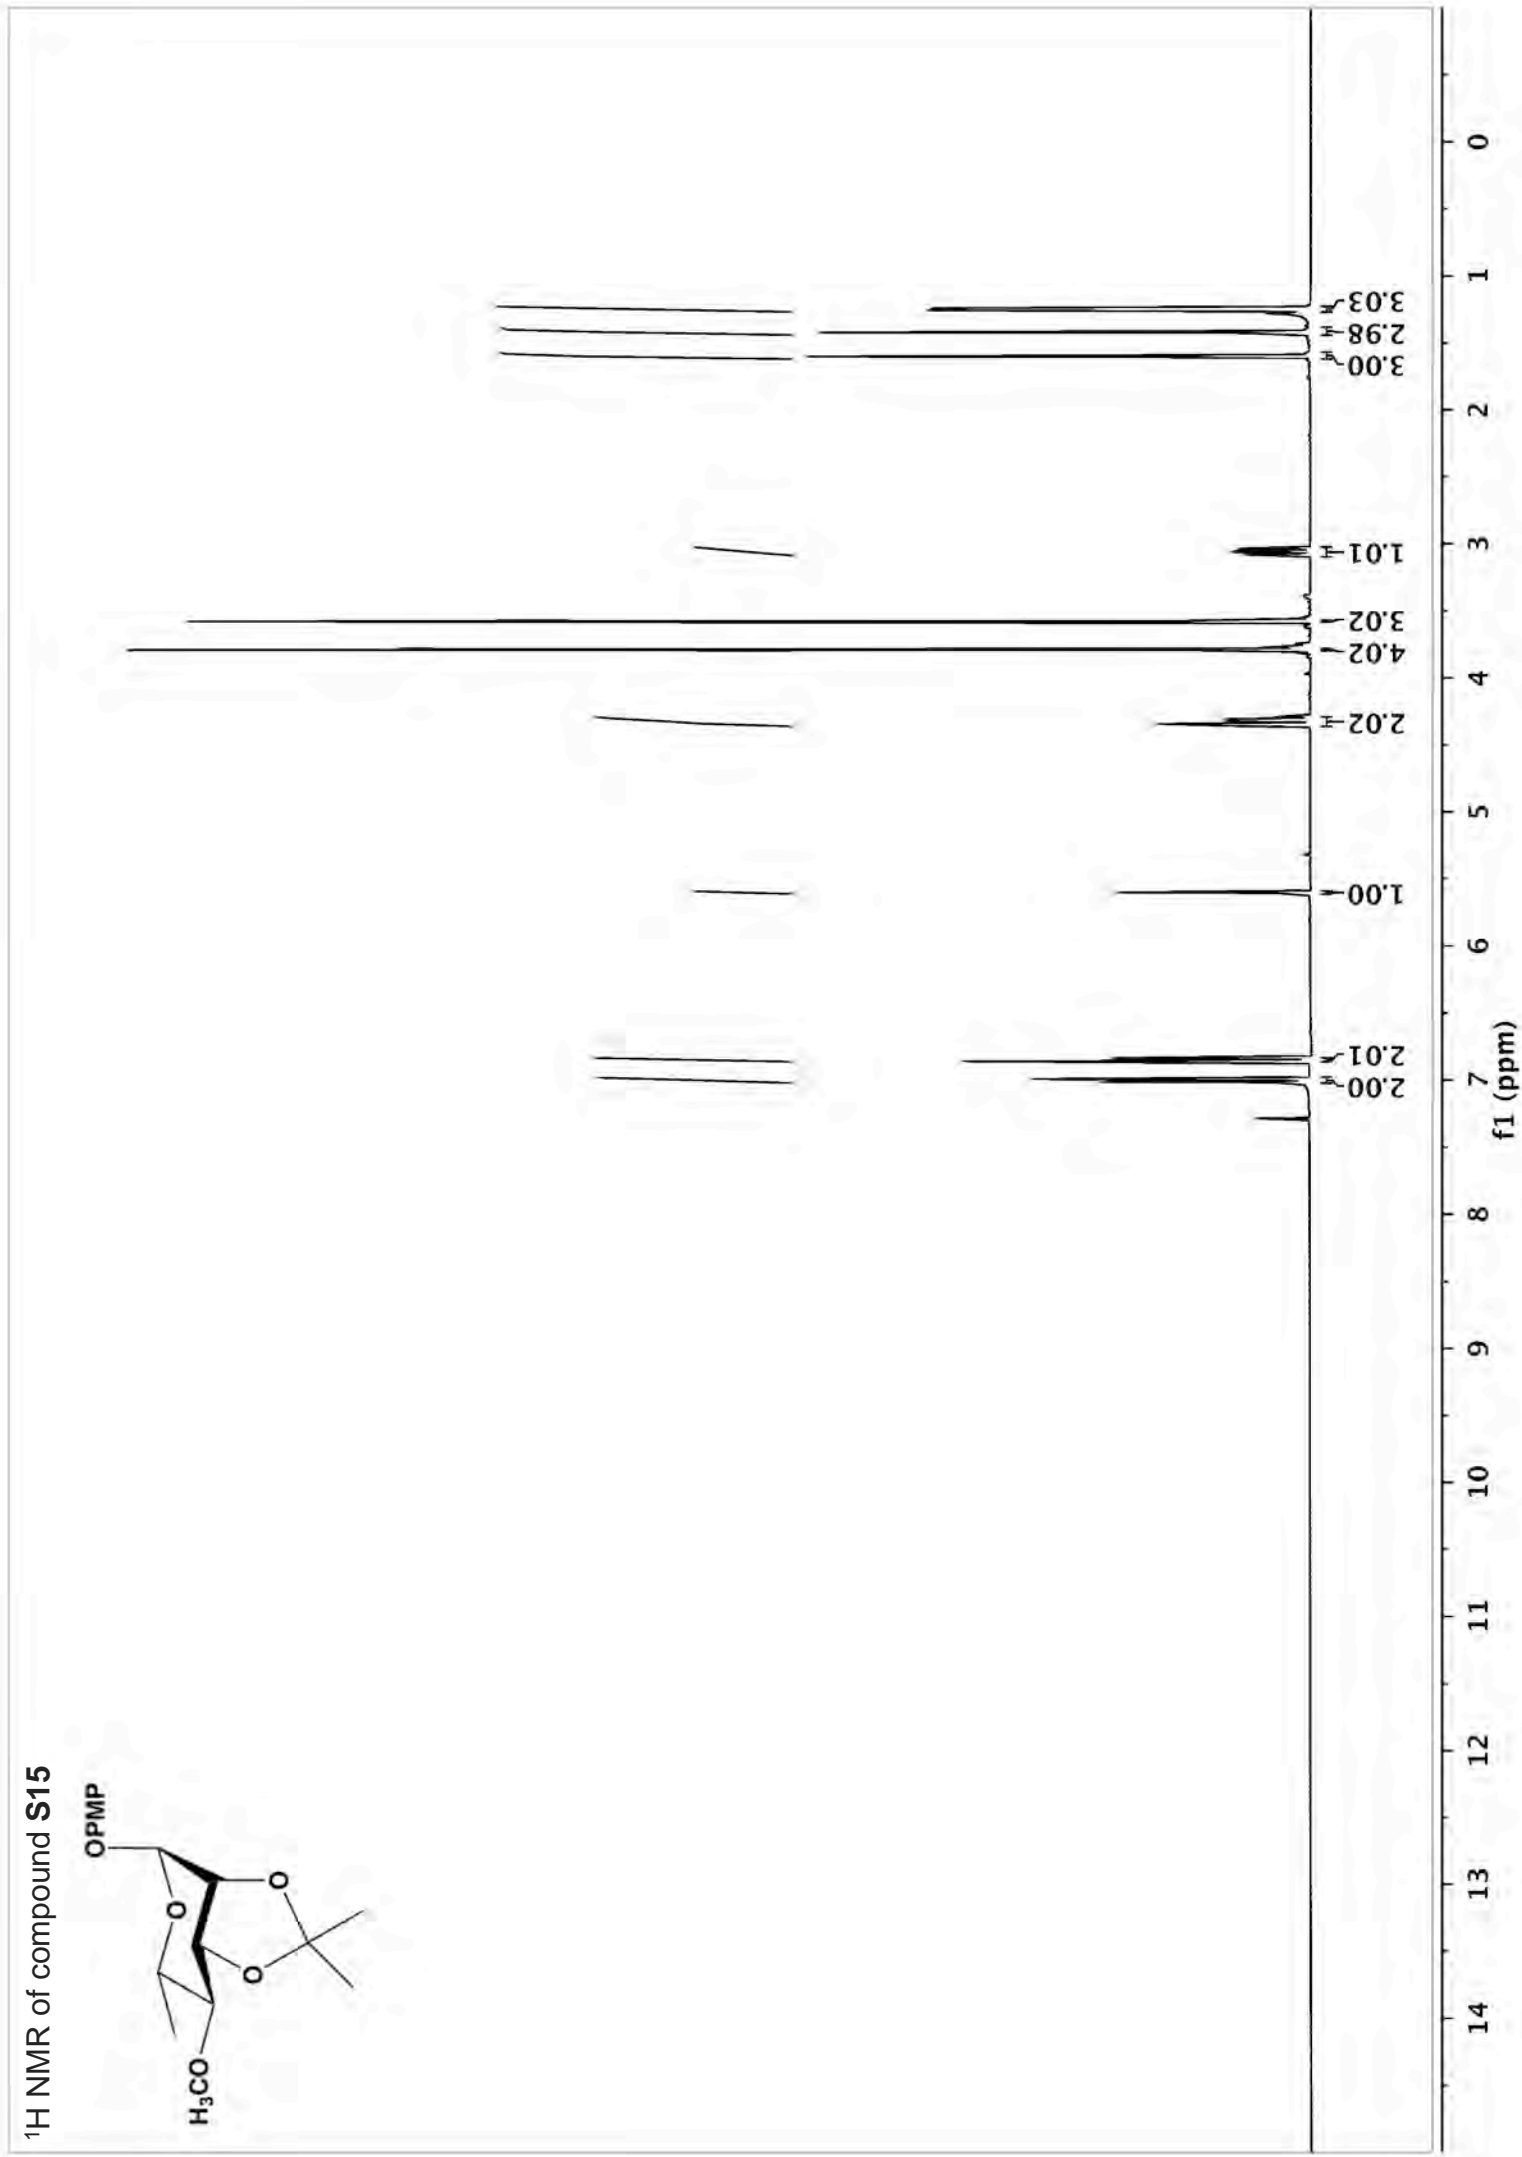

<sup>13</sup>C NMR of compound S16

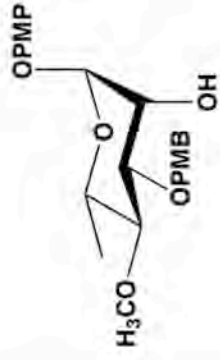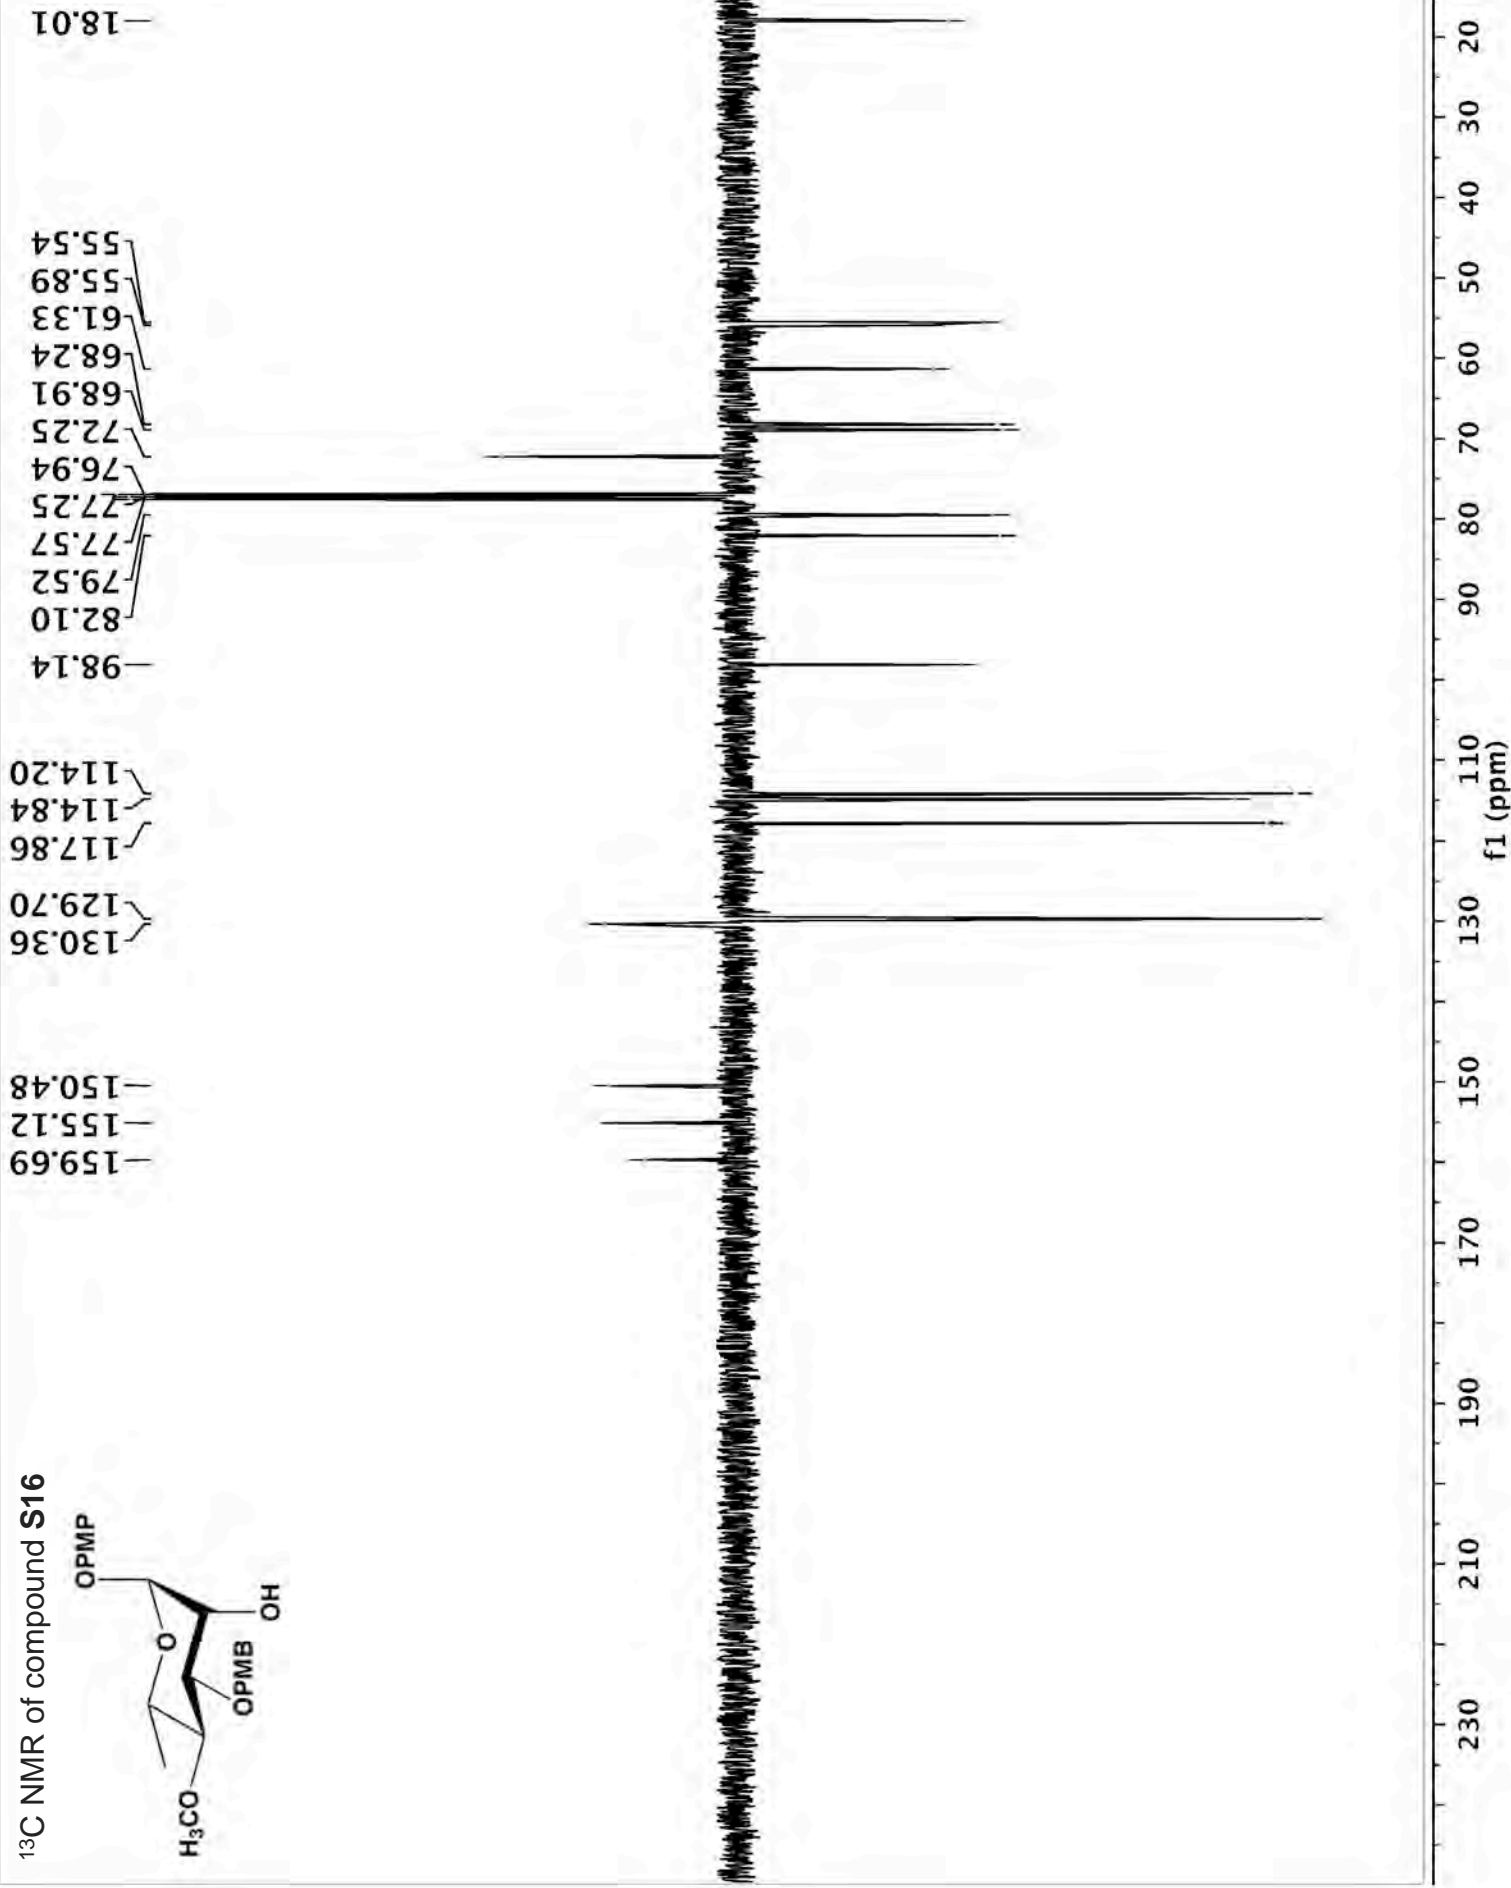

<sup>1</sup>H NMR of compound S16

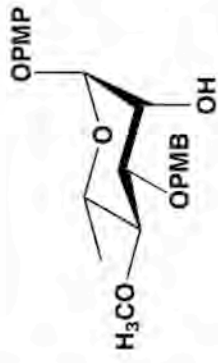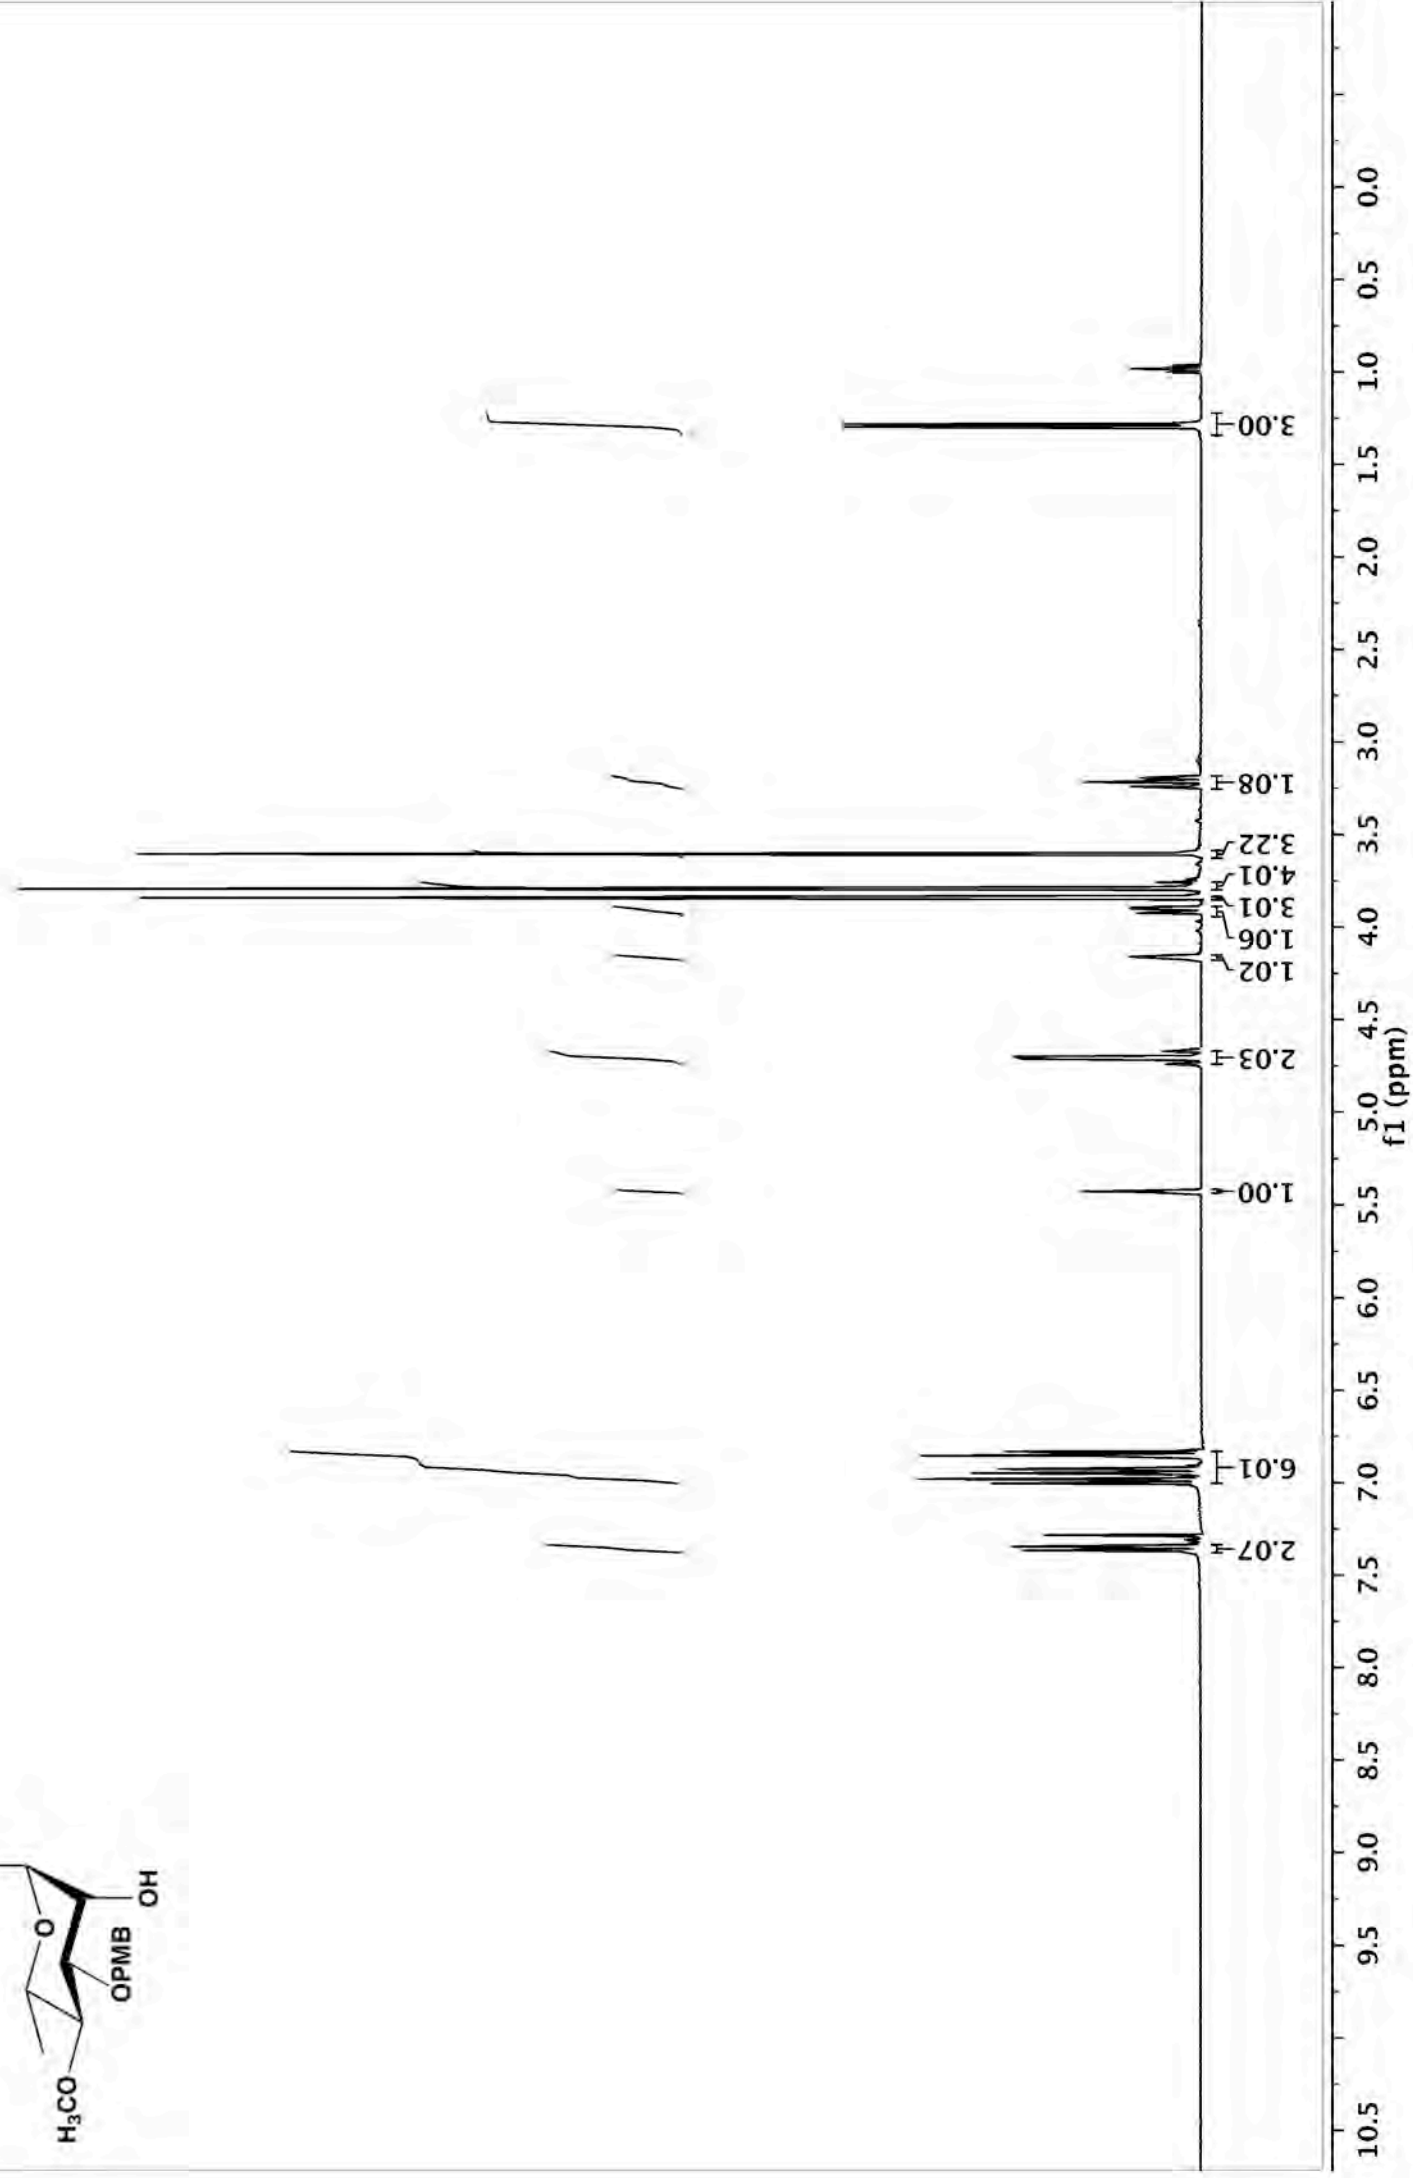

<sup>13</sup>C NMR of compound S17

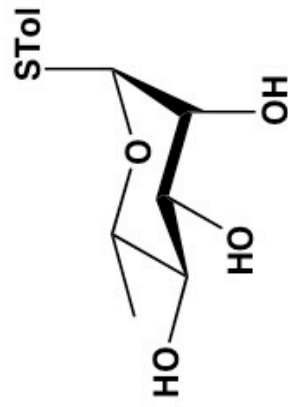

133.09  
132.06  
130.65  
129.99  
90.37  
74.01  
73.65  
72.75  
70.72  
49.25  
49.04  
48.83  
48.62  
48.40  
48.19  
20.91  
17.66

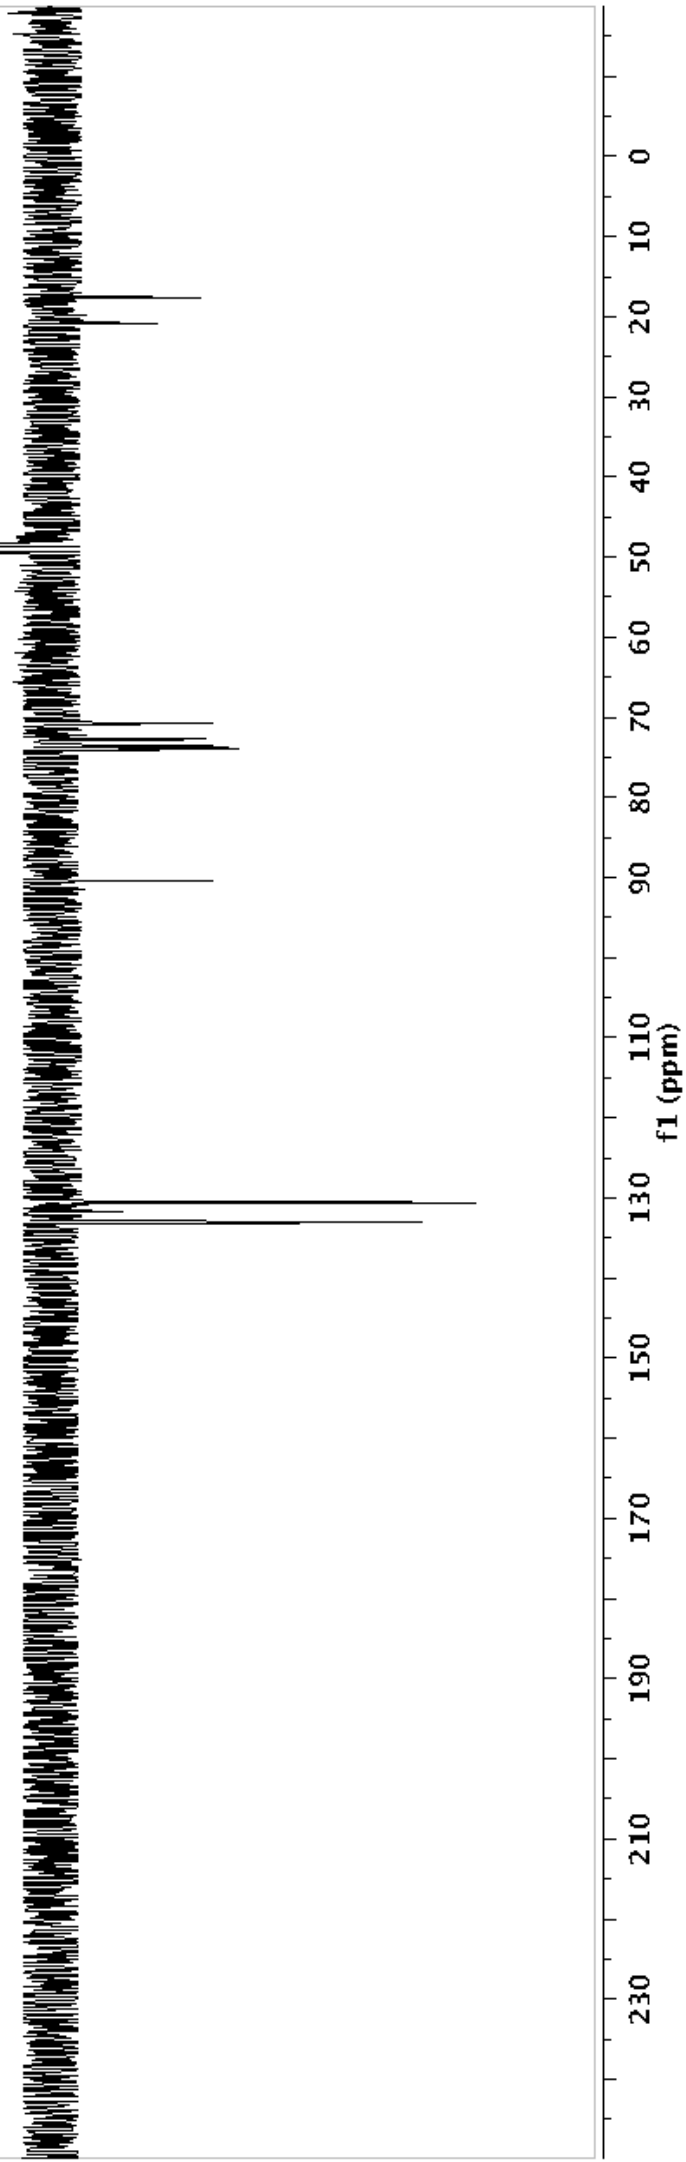

<sup>1</sup>H NMR for compound S17

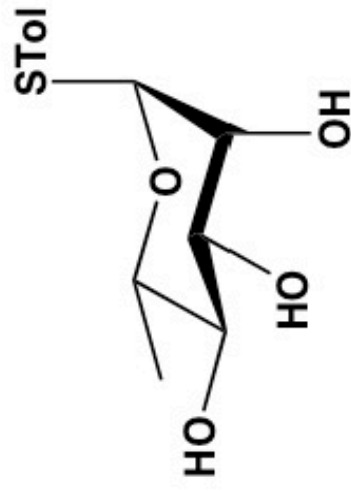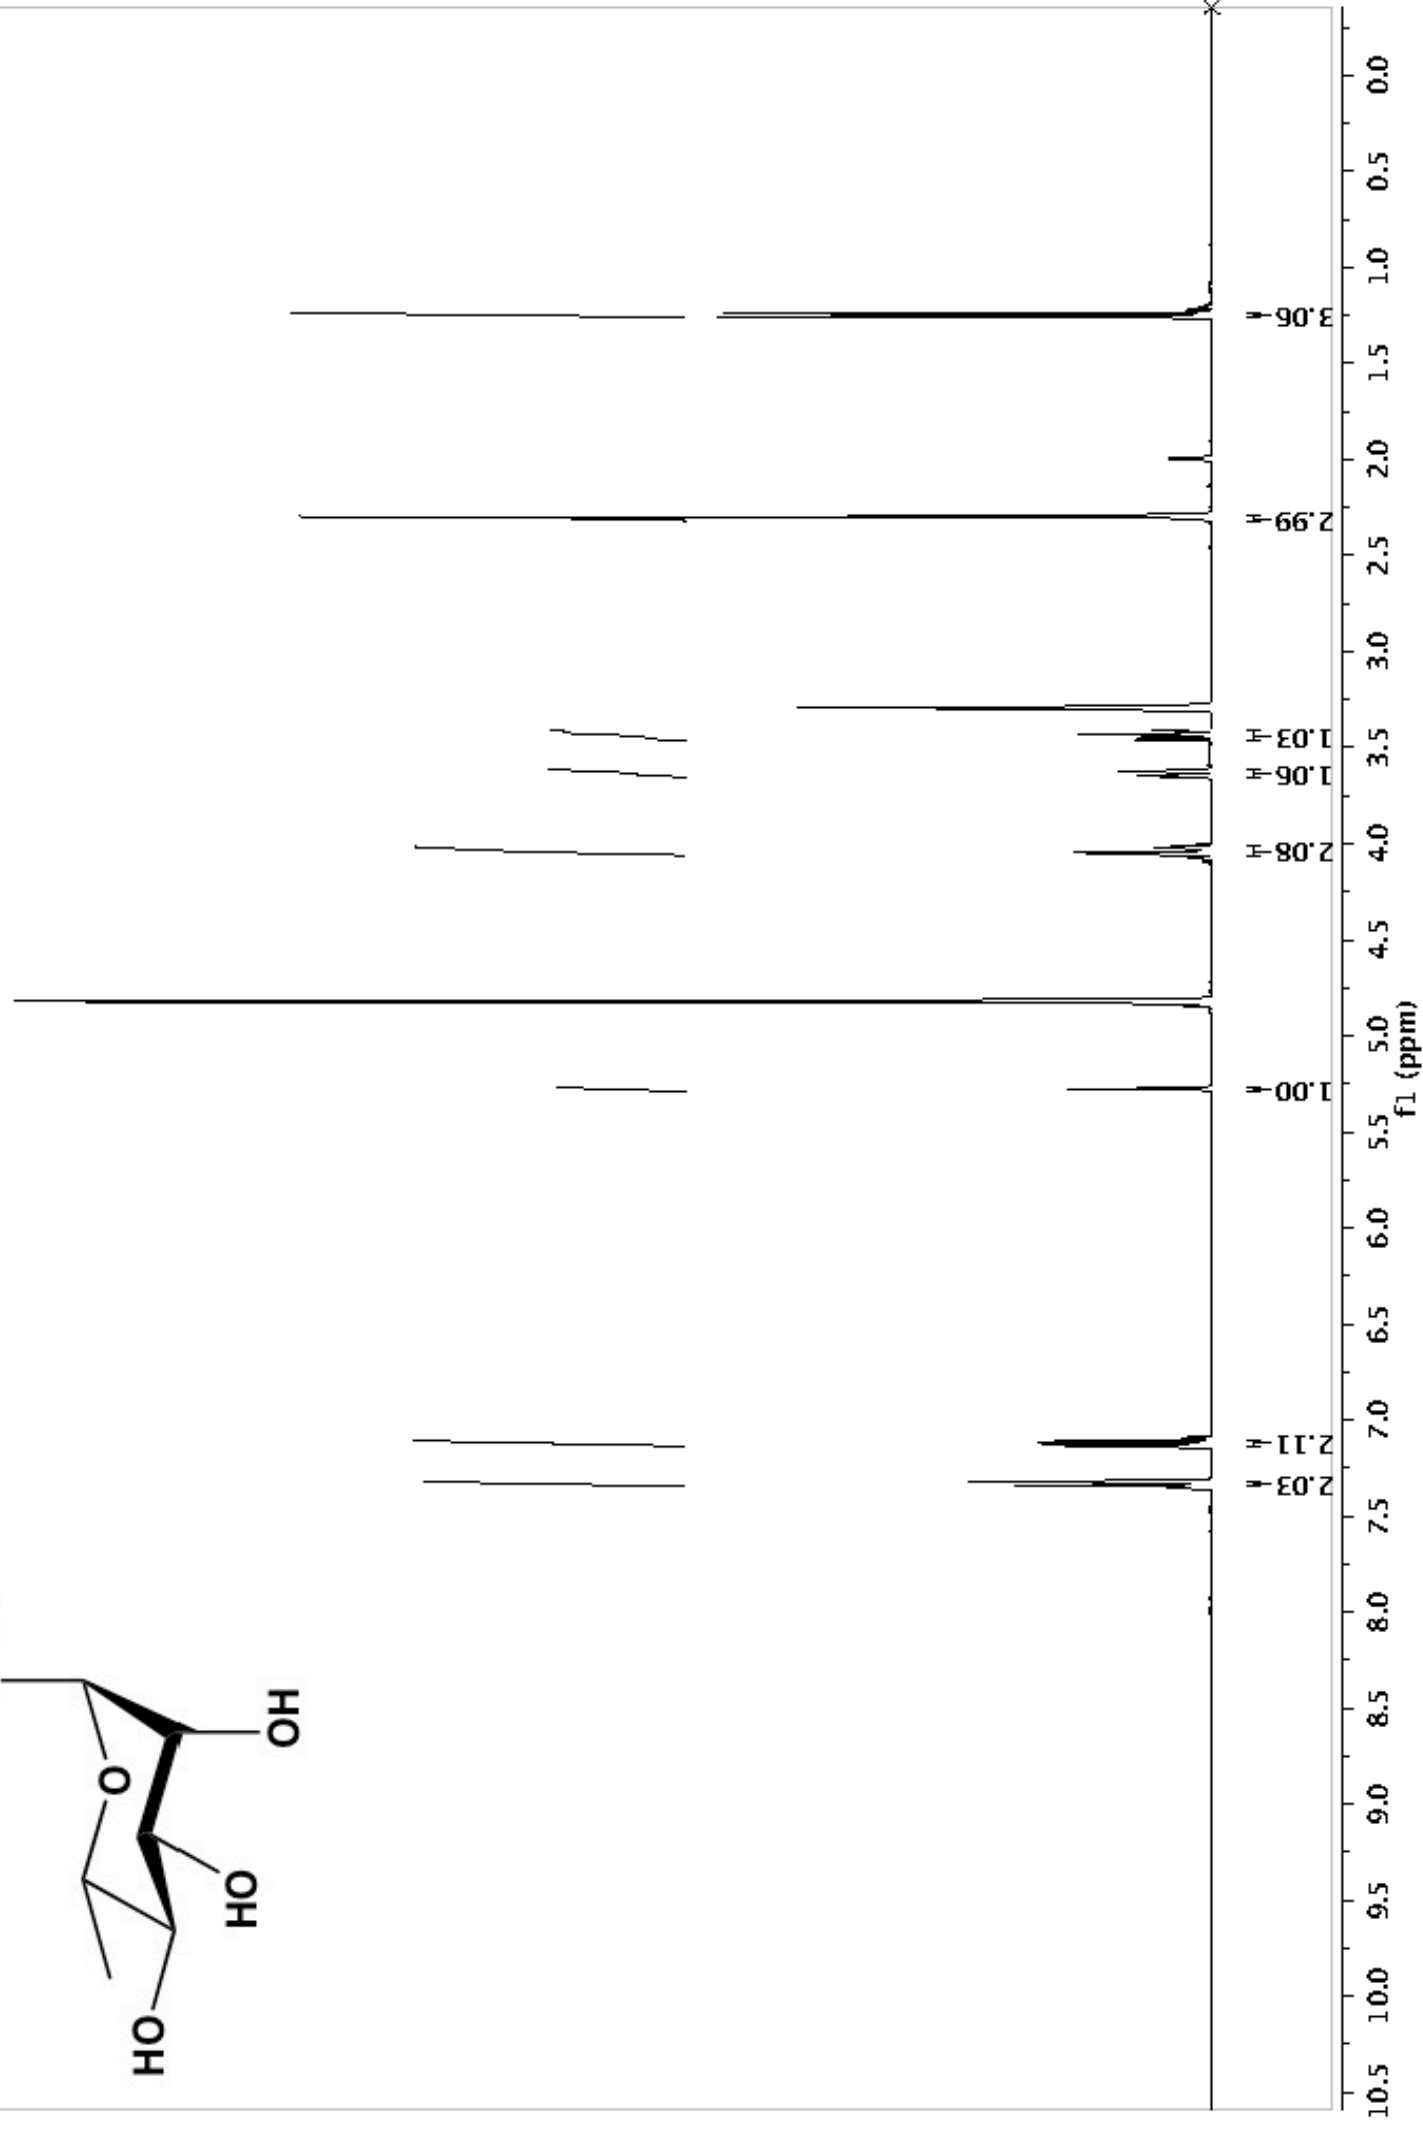

<sup>13</sup>C NMR of compound S18

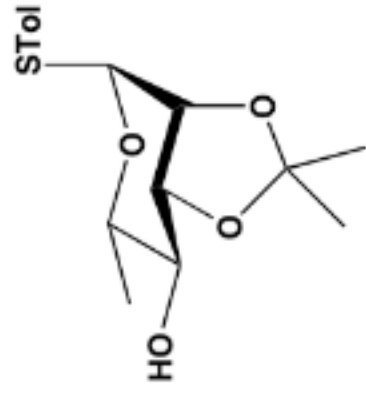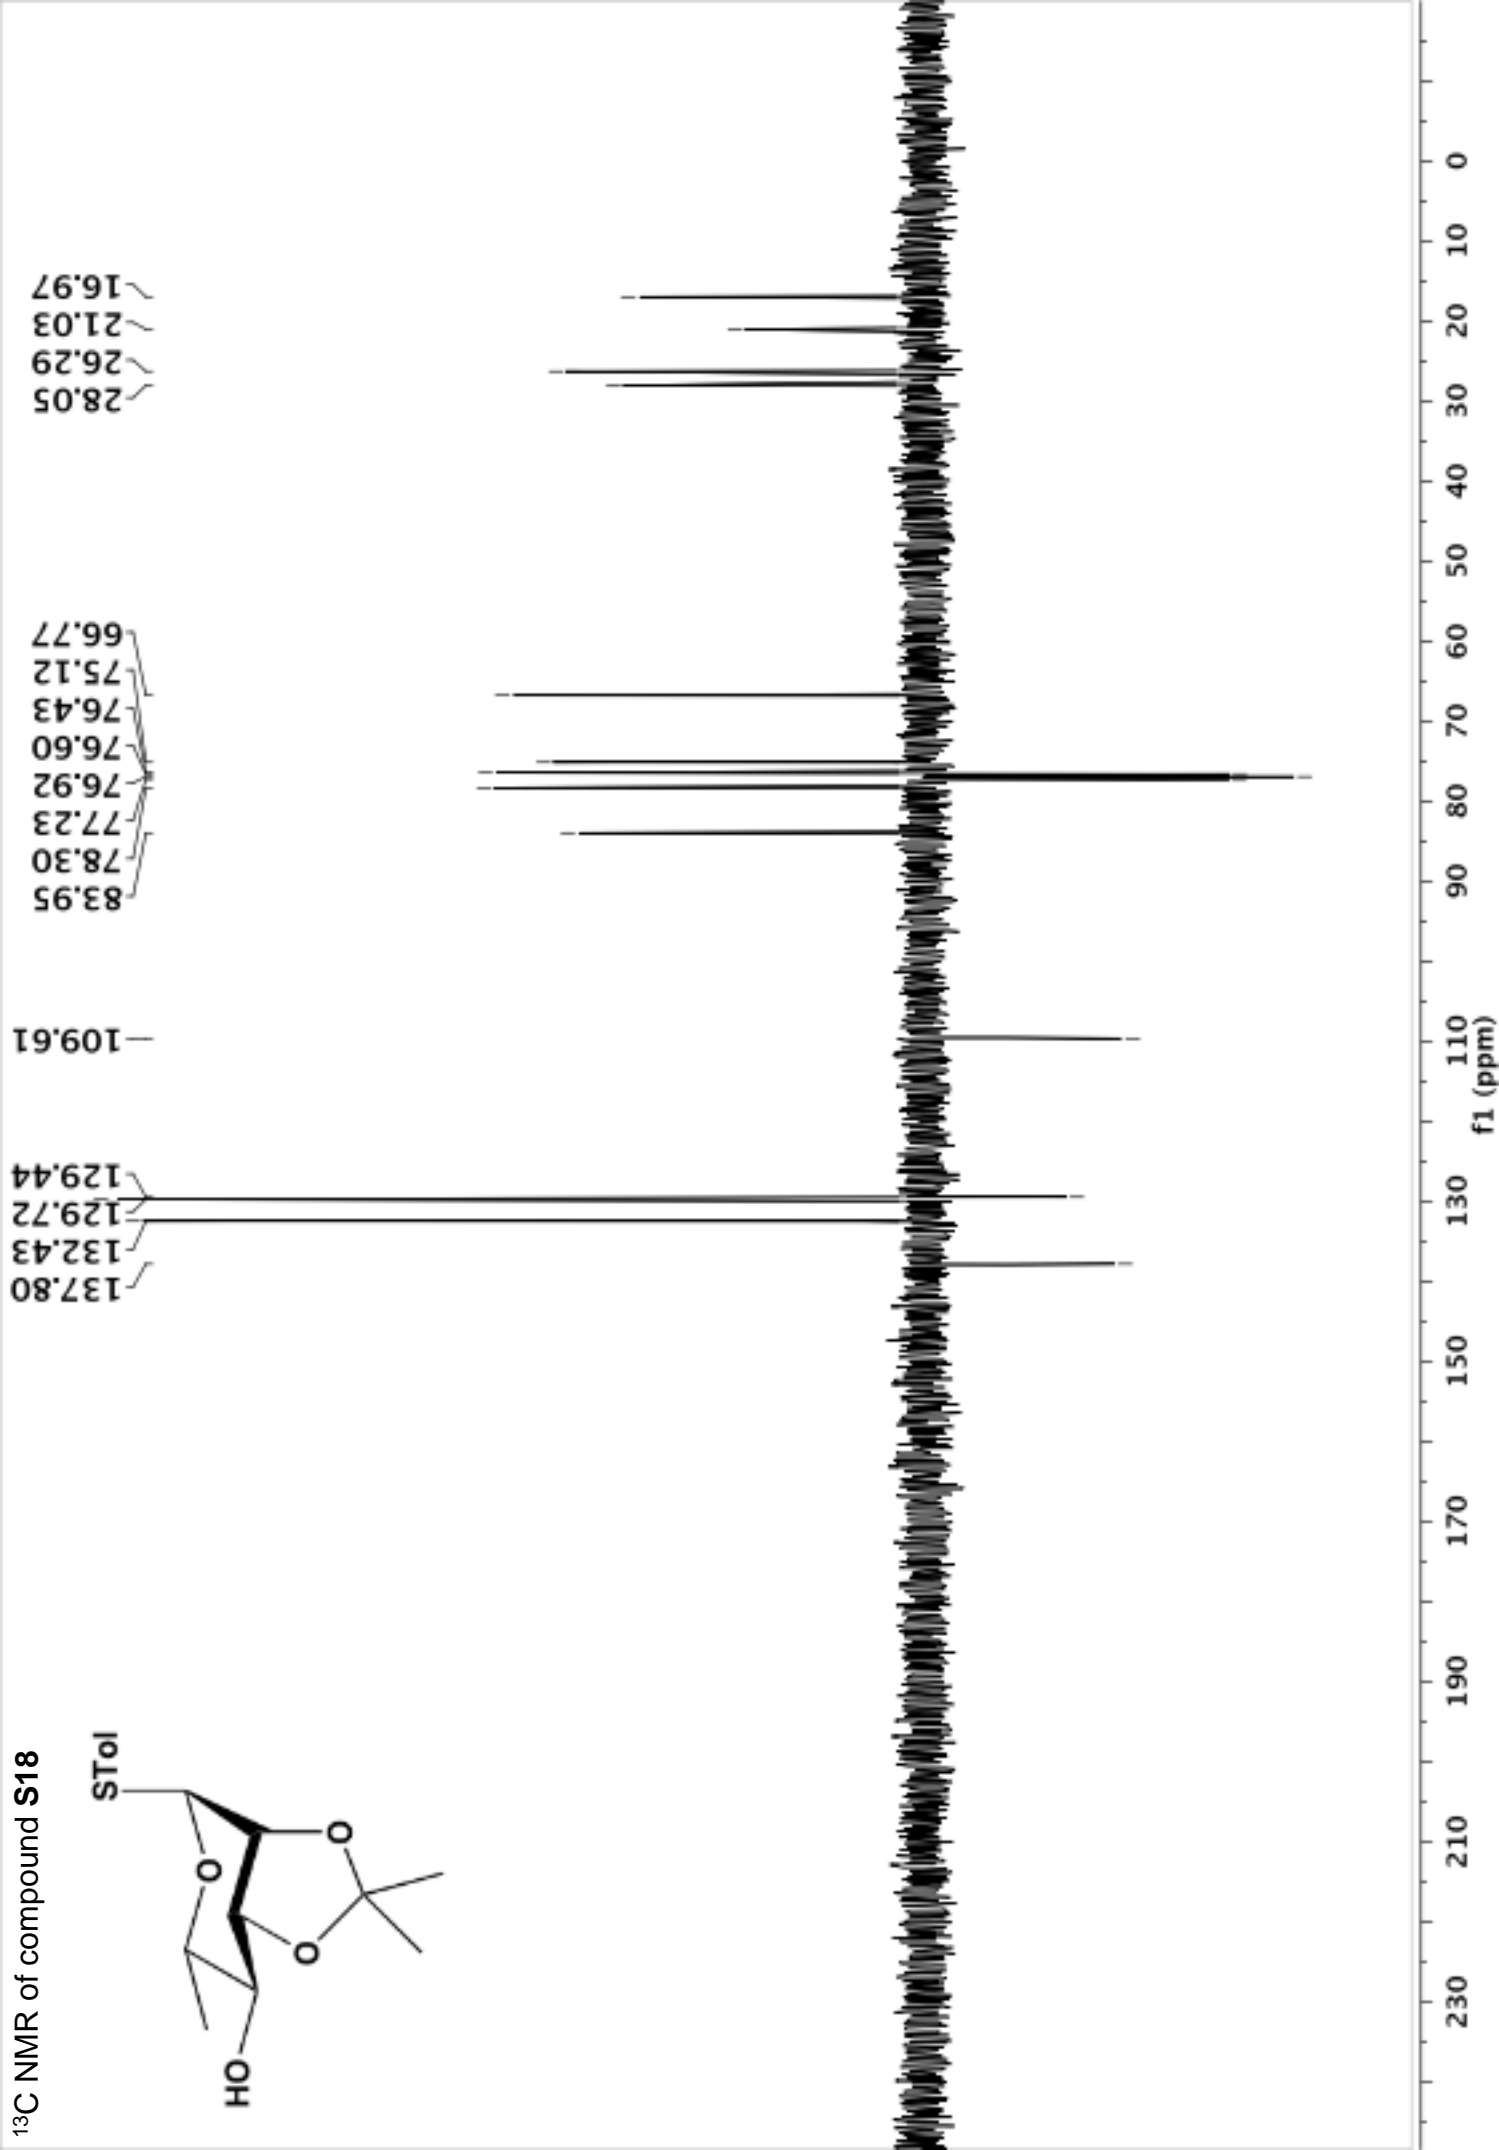

<sup>1</sup>H NMR of compound **S18**

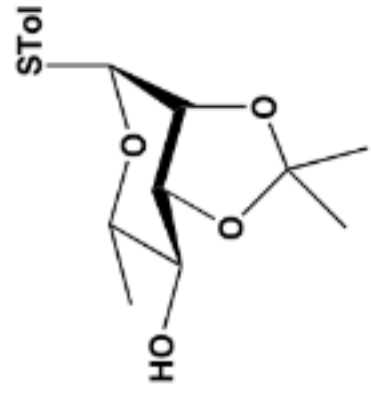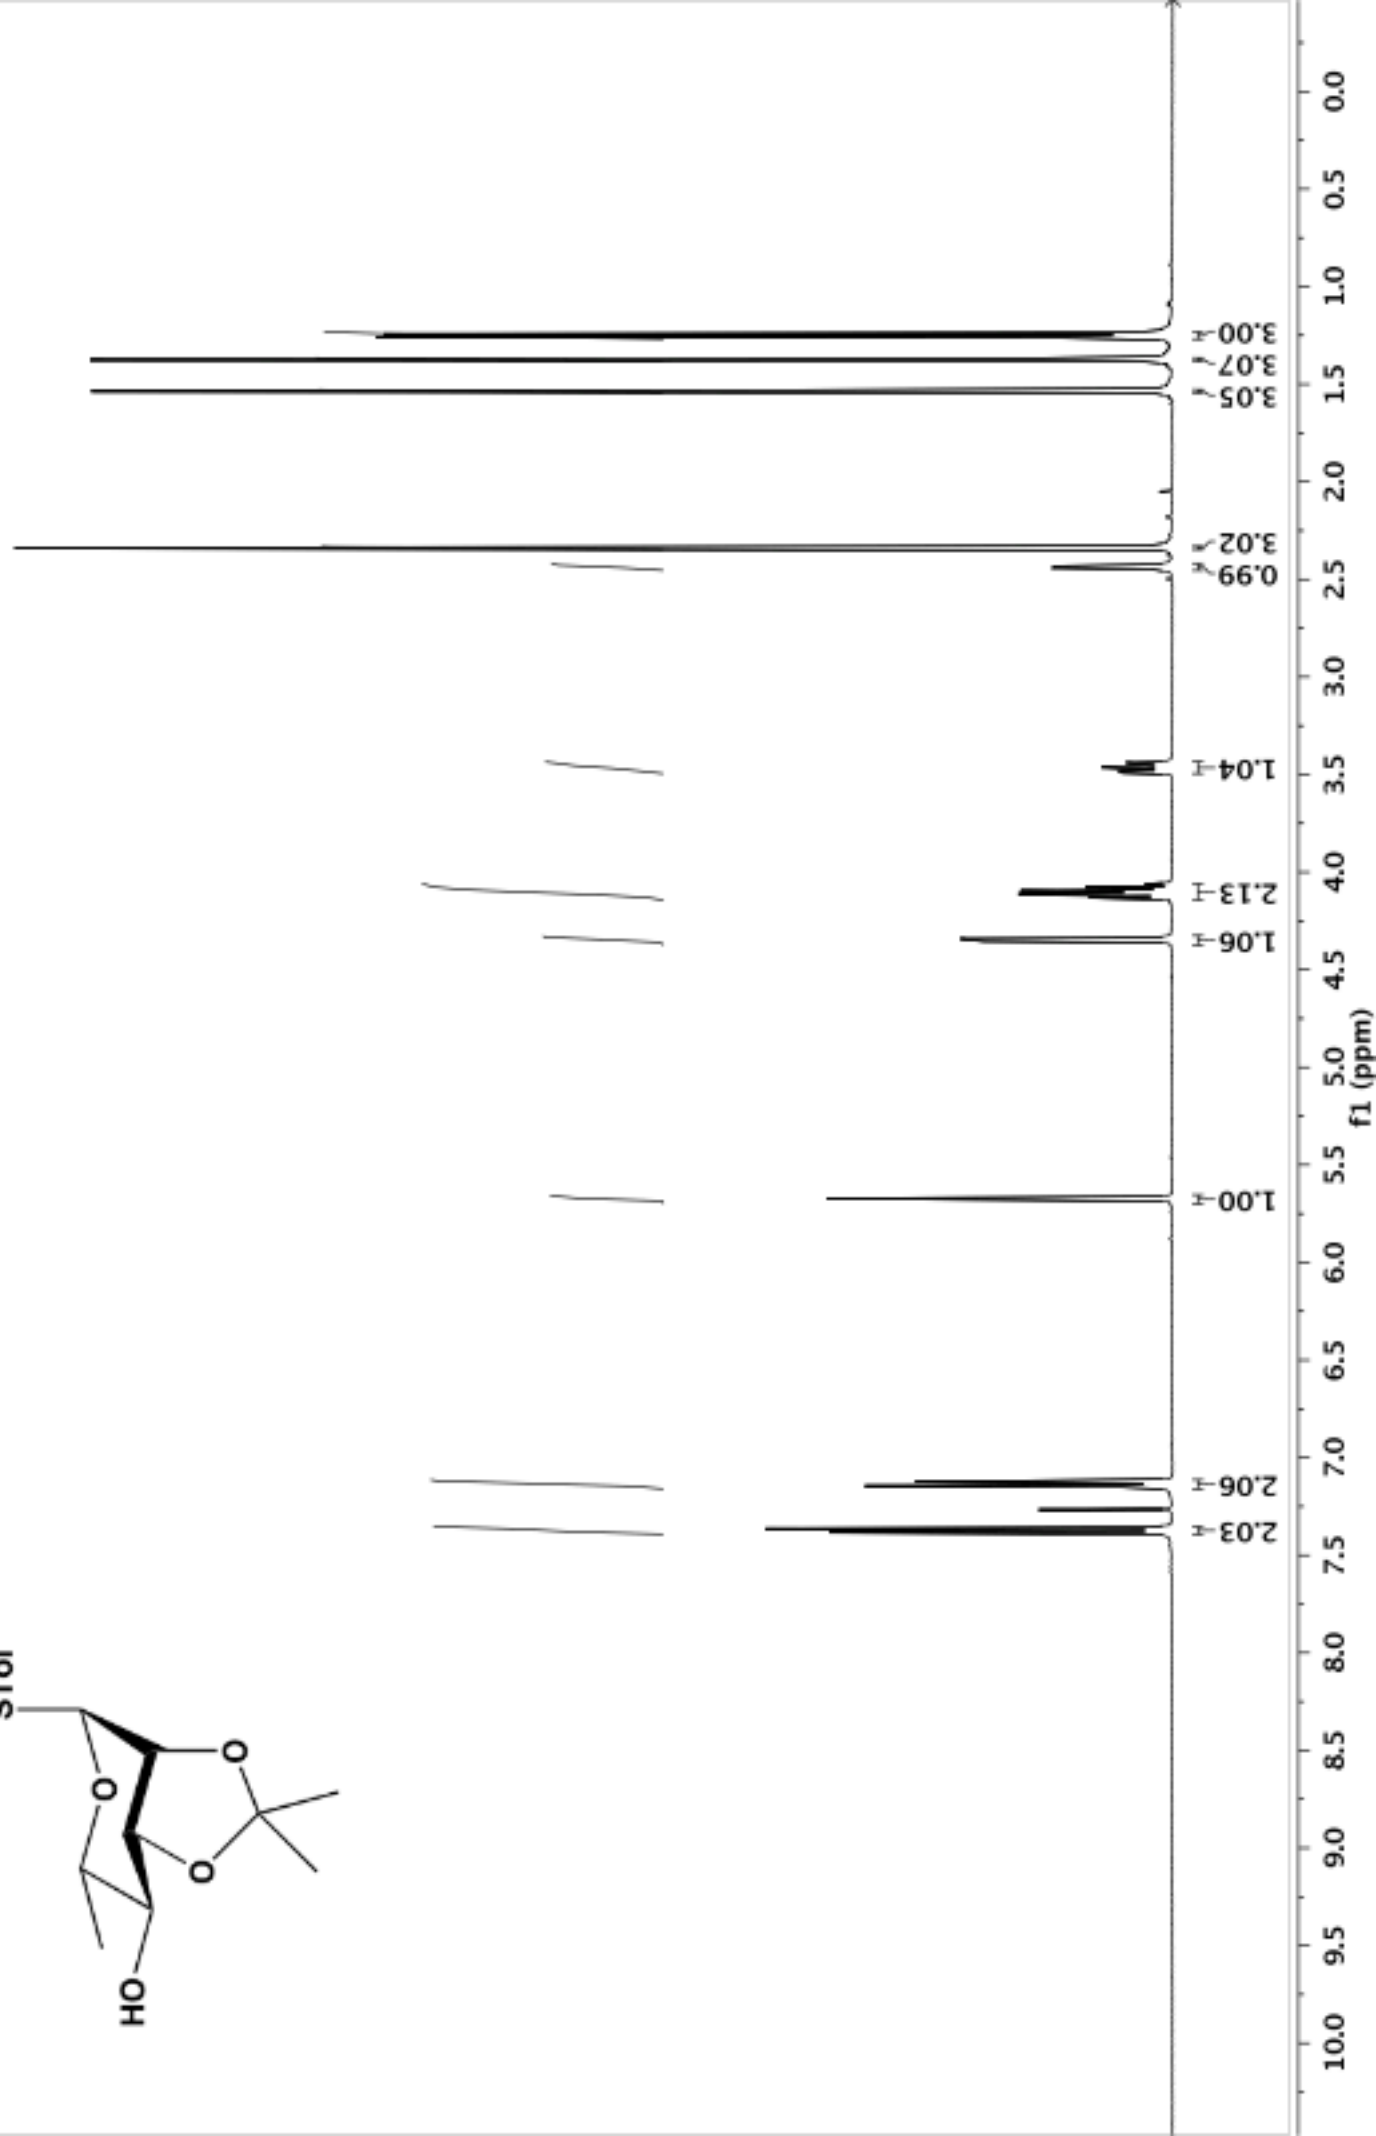

<sup>13</sup>CNMR of compound S19

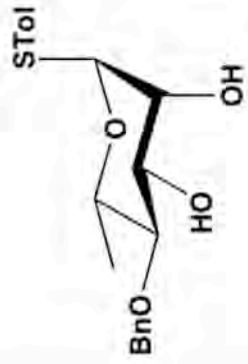

- 138.41
- 137.92
- 132.34
- 130.48
- 130.08
- 128.91
- 128.31
- 128.21
- 88.05
- 82.13
- 77.59
- 77.27
- 76.95
- 75.29
- 72.79
- 72.11
- 68.78
- 21.35
- 18.17

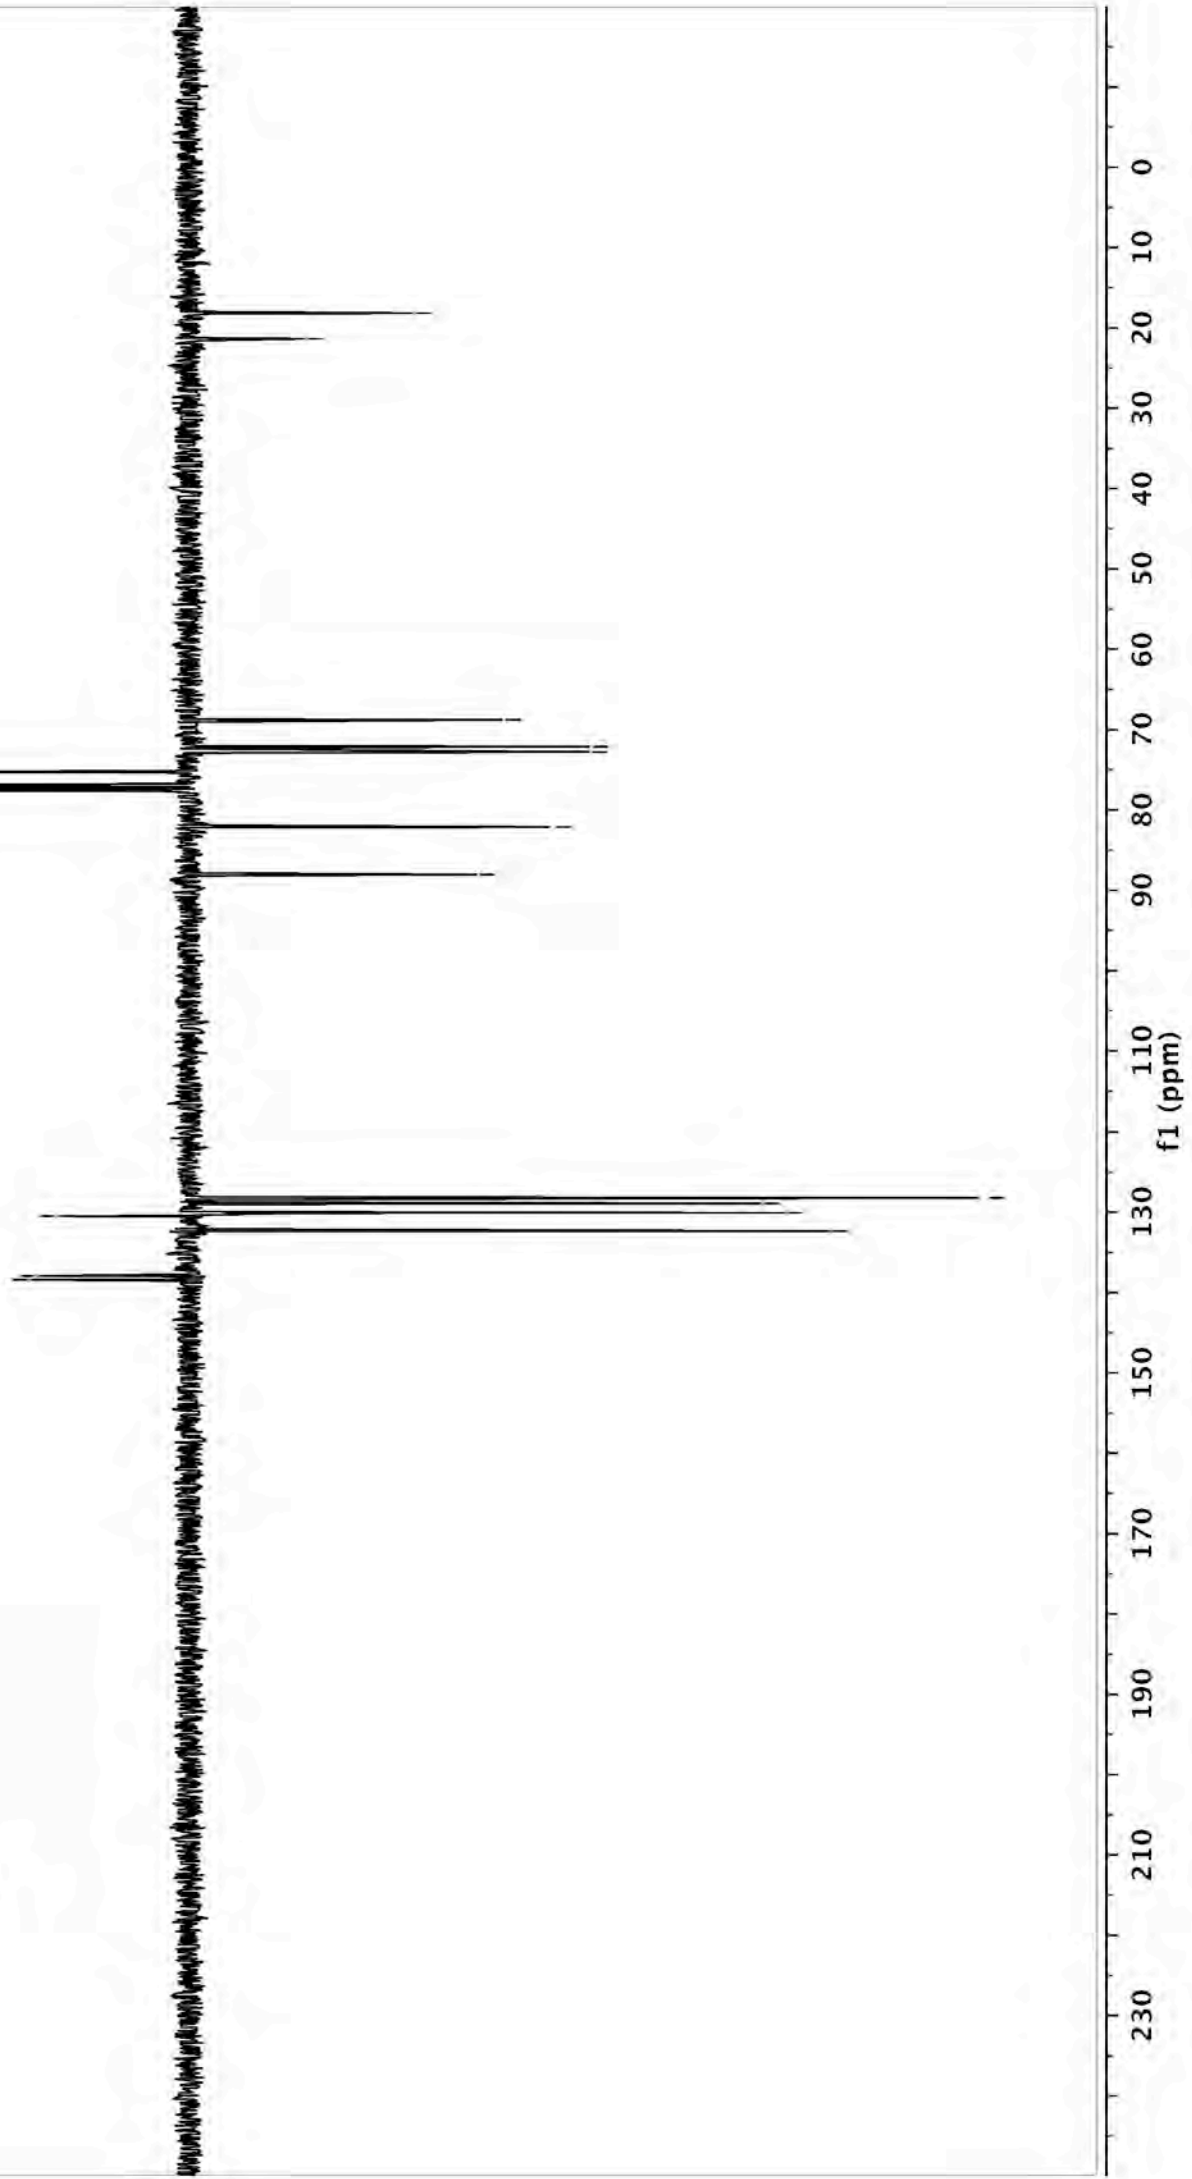



<sup>1</sup>H NMR of compound S19

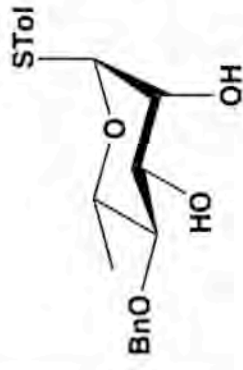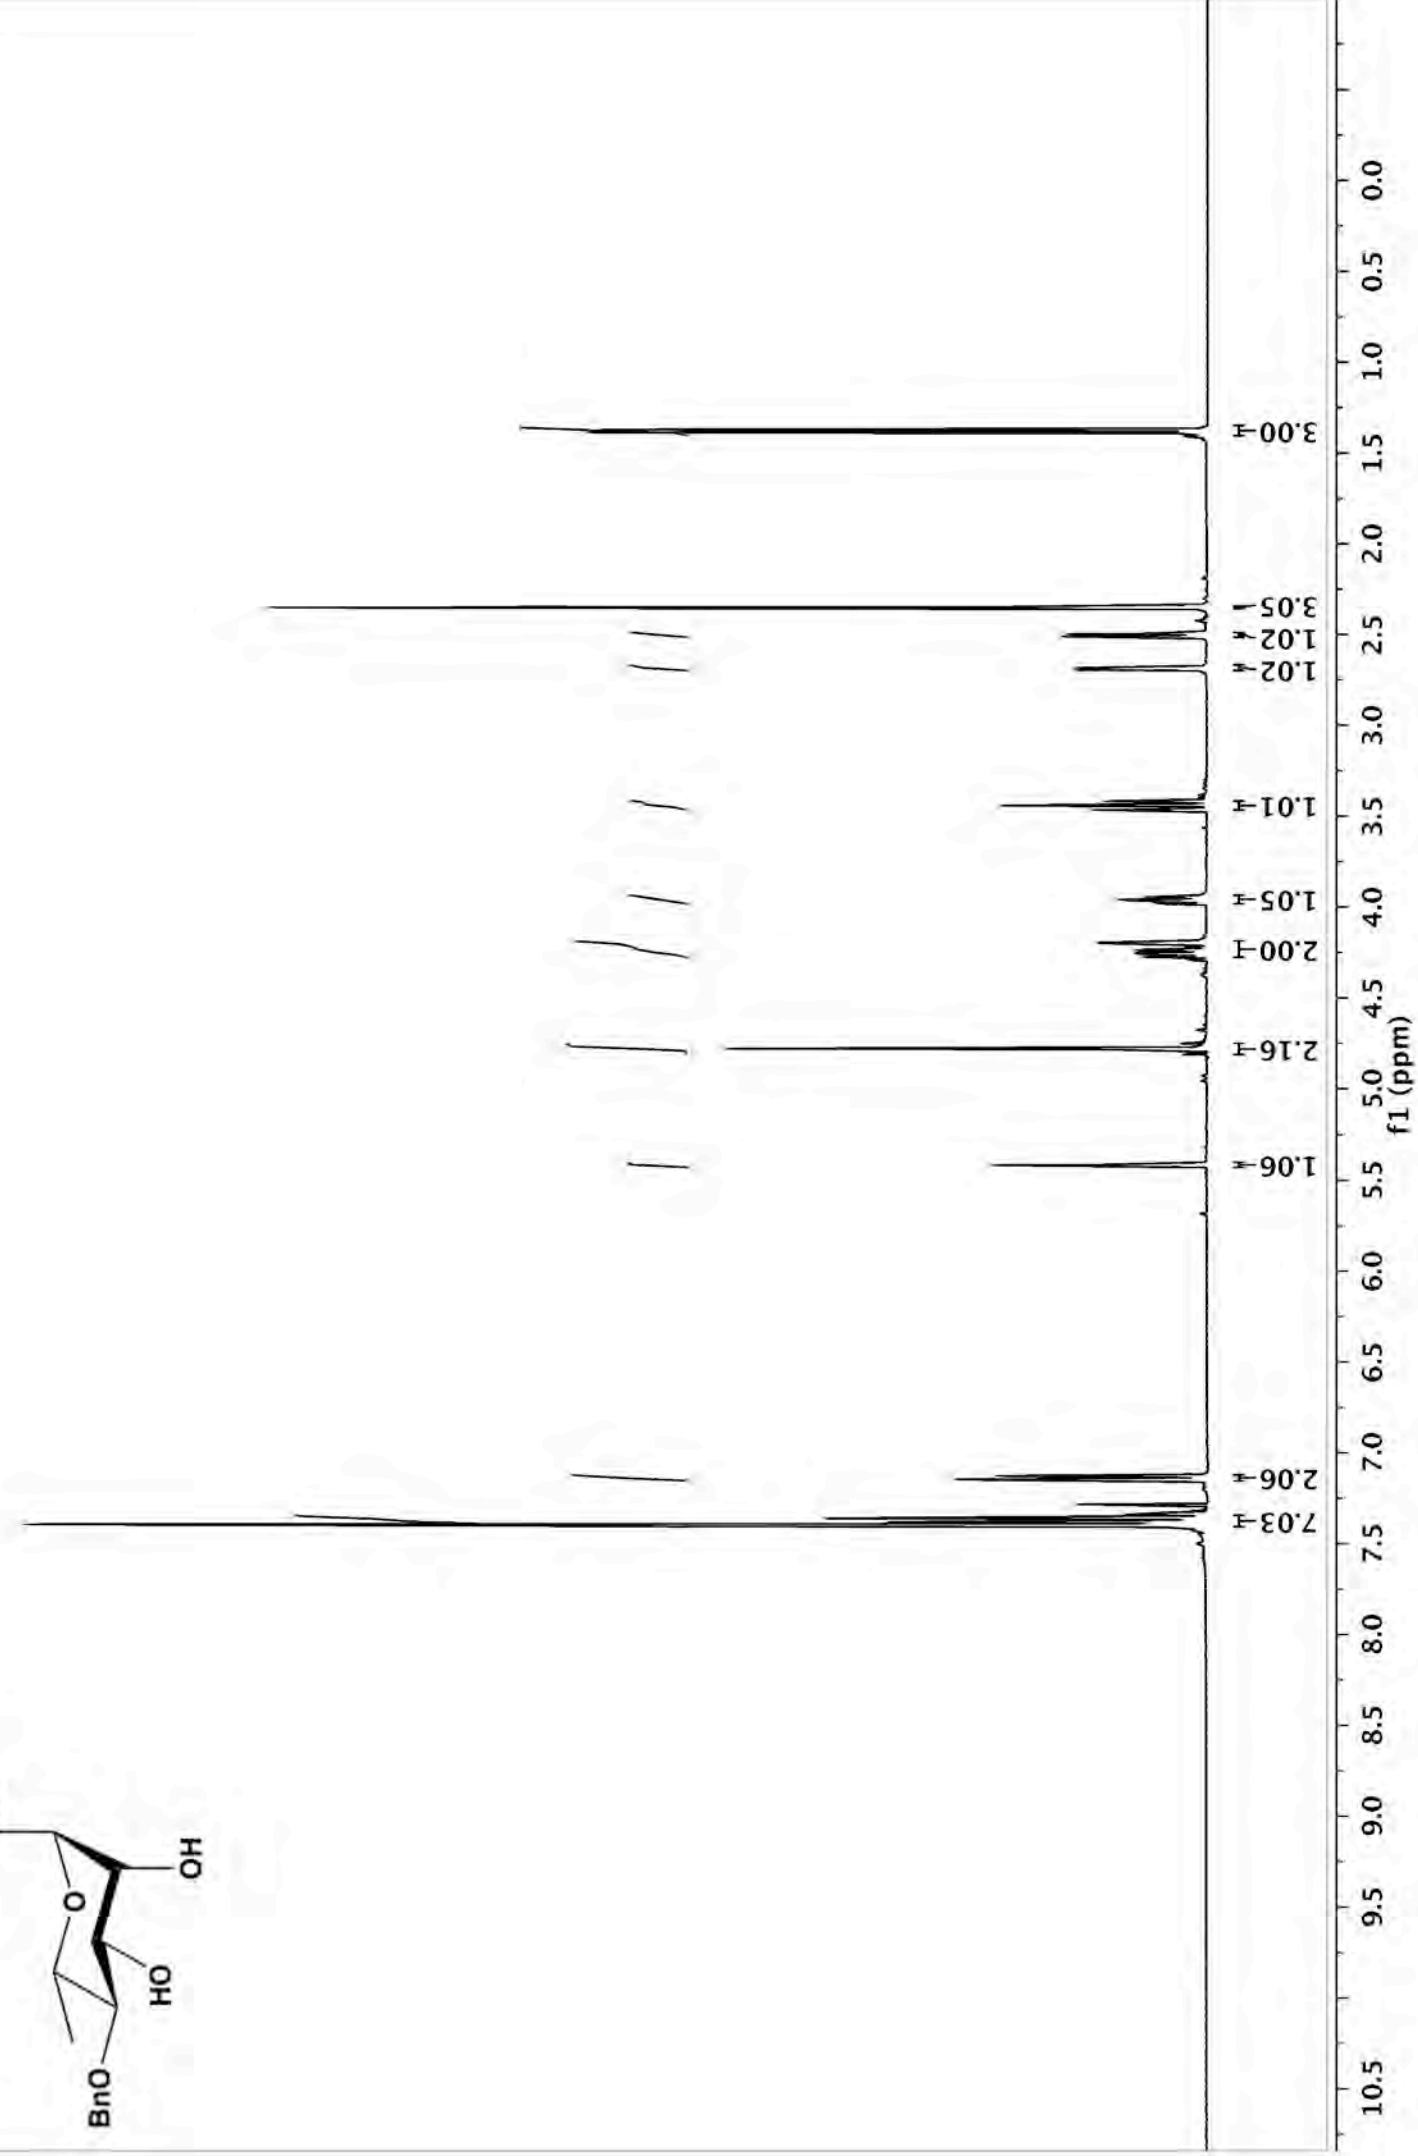

<sup>13</sup>C NMR of compound S20

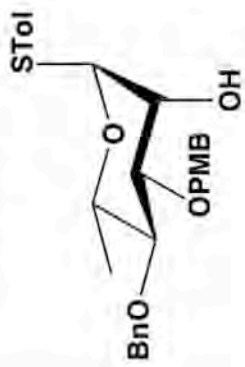

159.53  
138.36  
132.06  
129.82  
129.76  
129.68  
128.41  
127.95  
127.75  
114.03  
87.34  
80.13  
79.74  
77.28  
77.03  
76.77  
75.40  
71.84  
70.08  
68.72  
55.29  
21.11  
17.80

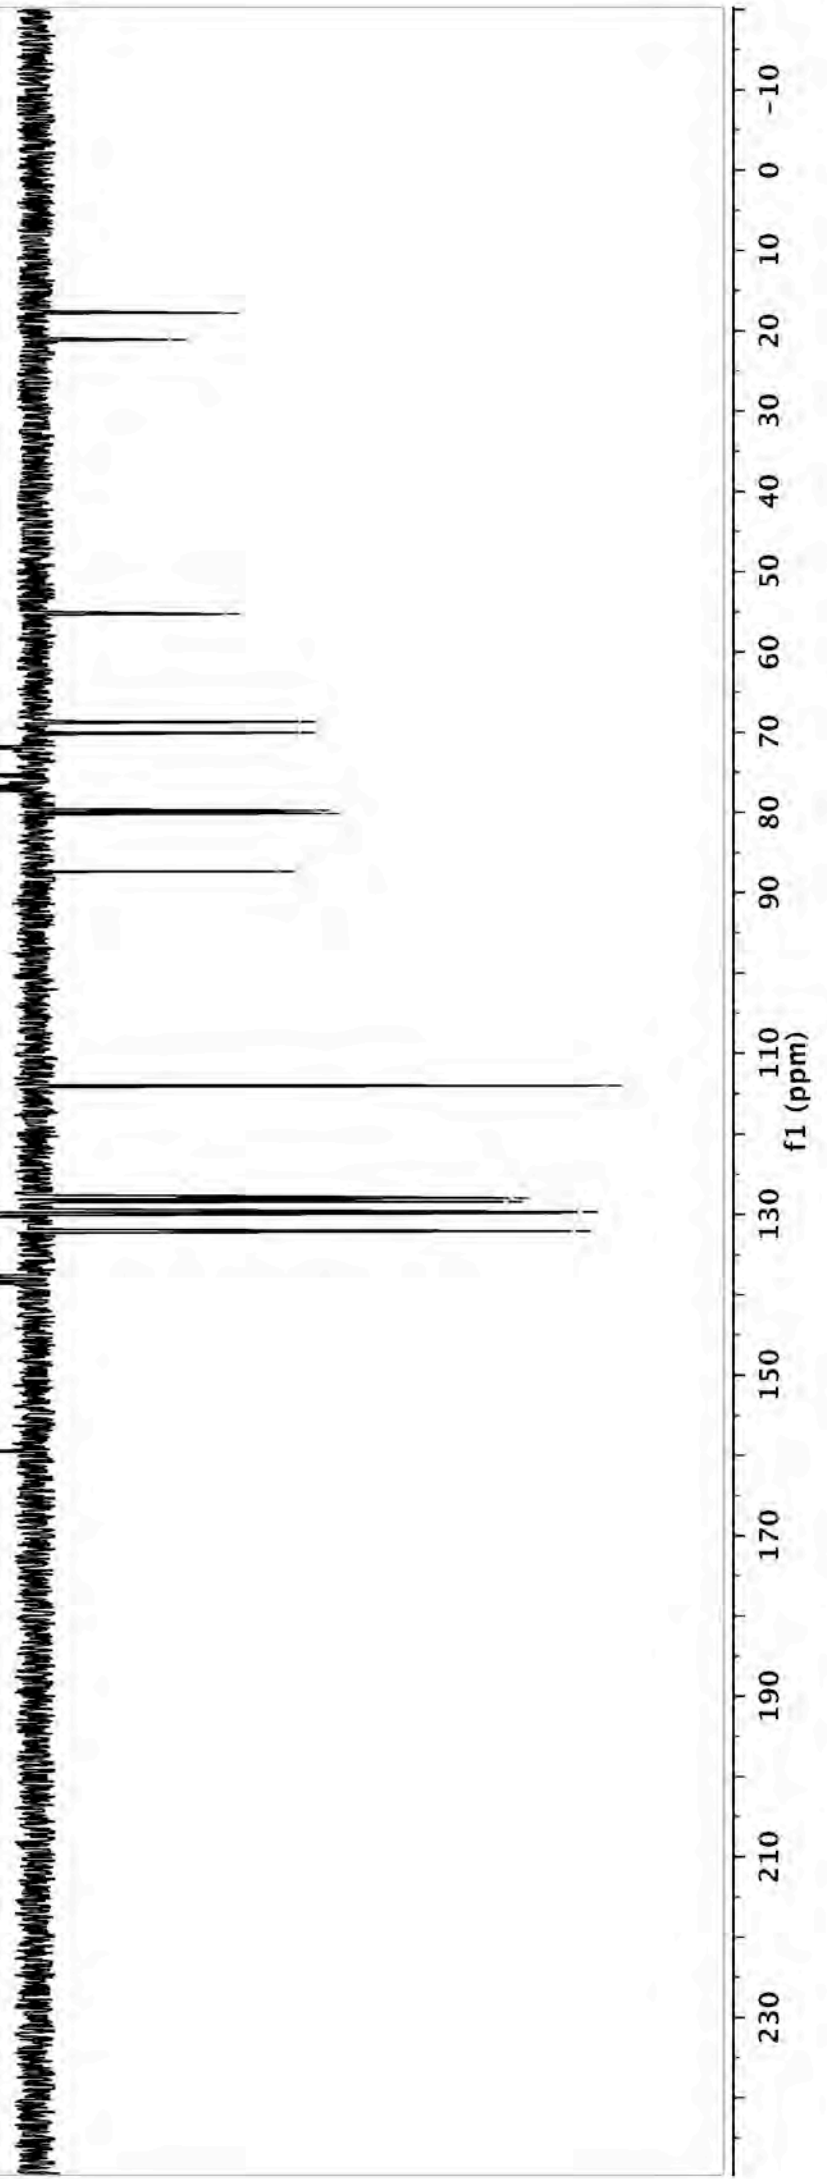

<sup>1</sup>H NMR of compound S20

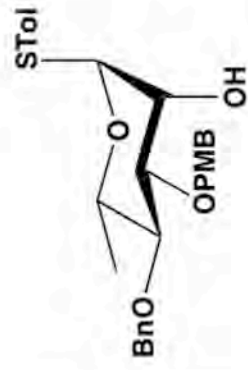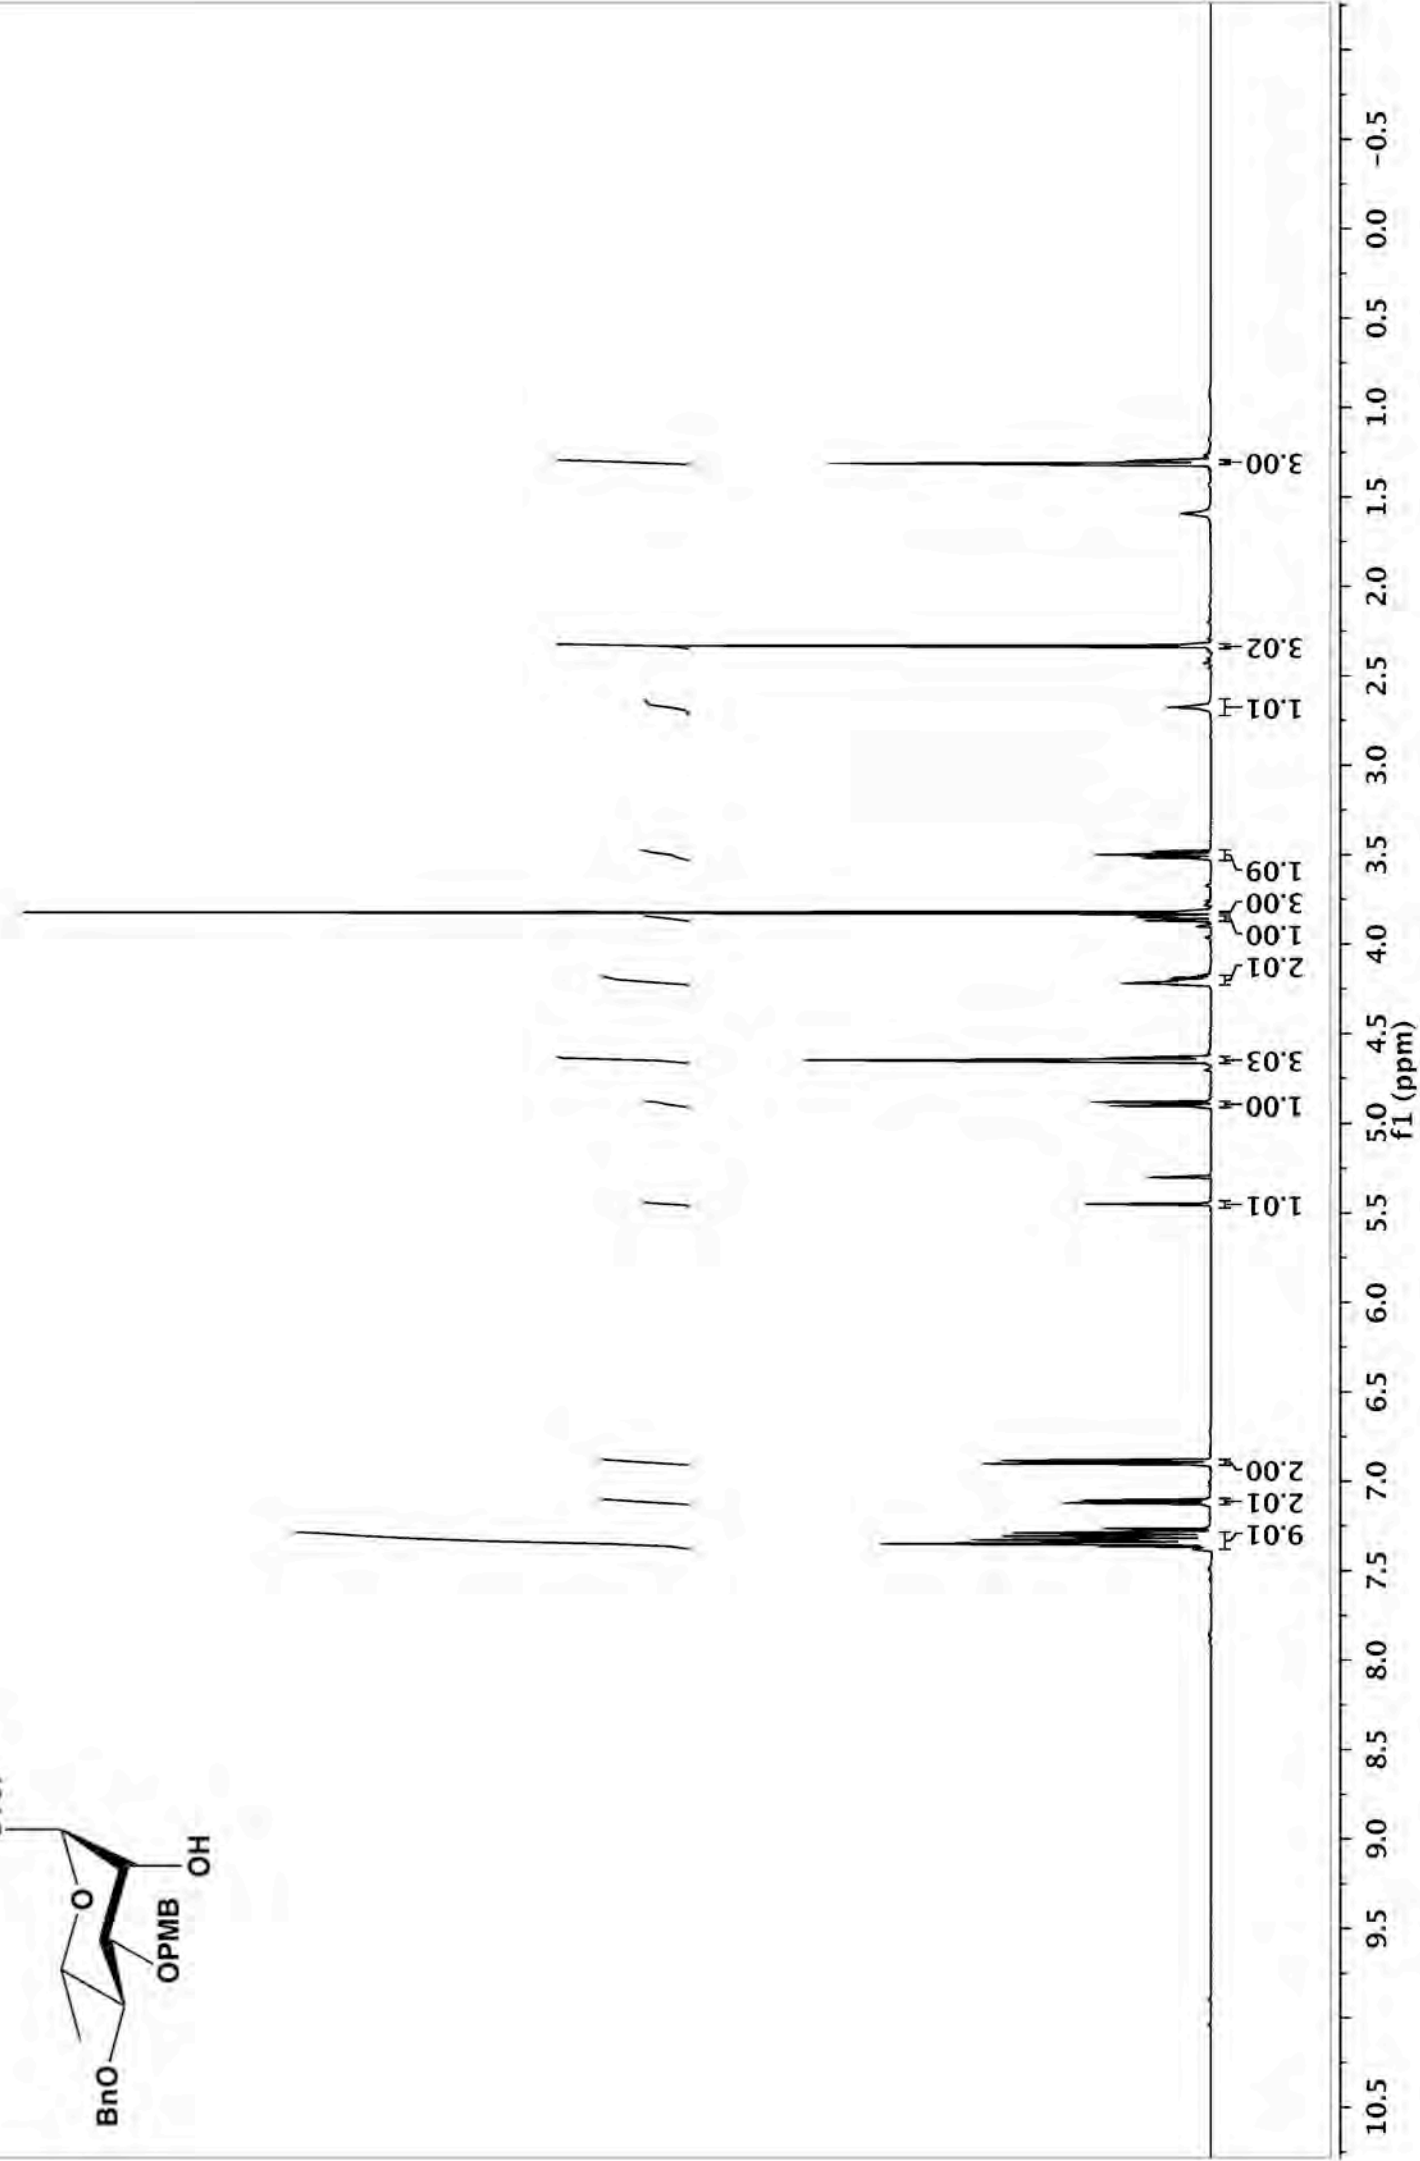

<sup>13</sup>C NMR of compound S21

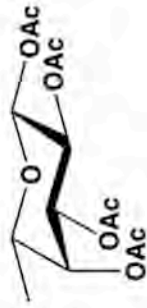

170.59  
170.11  
169.46

138.19  
132.92  
129.60  
129.07

86.84

77.27  
77.01  
76.76  
73.12  
72.47  
70.36  
67.43

21.14  
20.88  
20.65  
20.62  
16.46

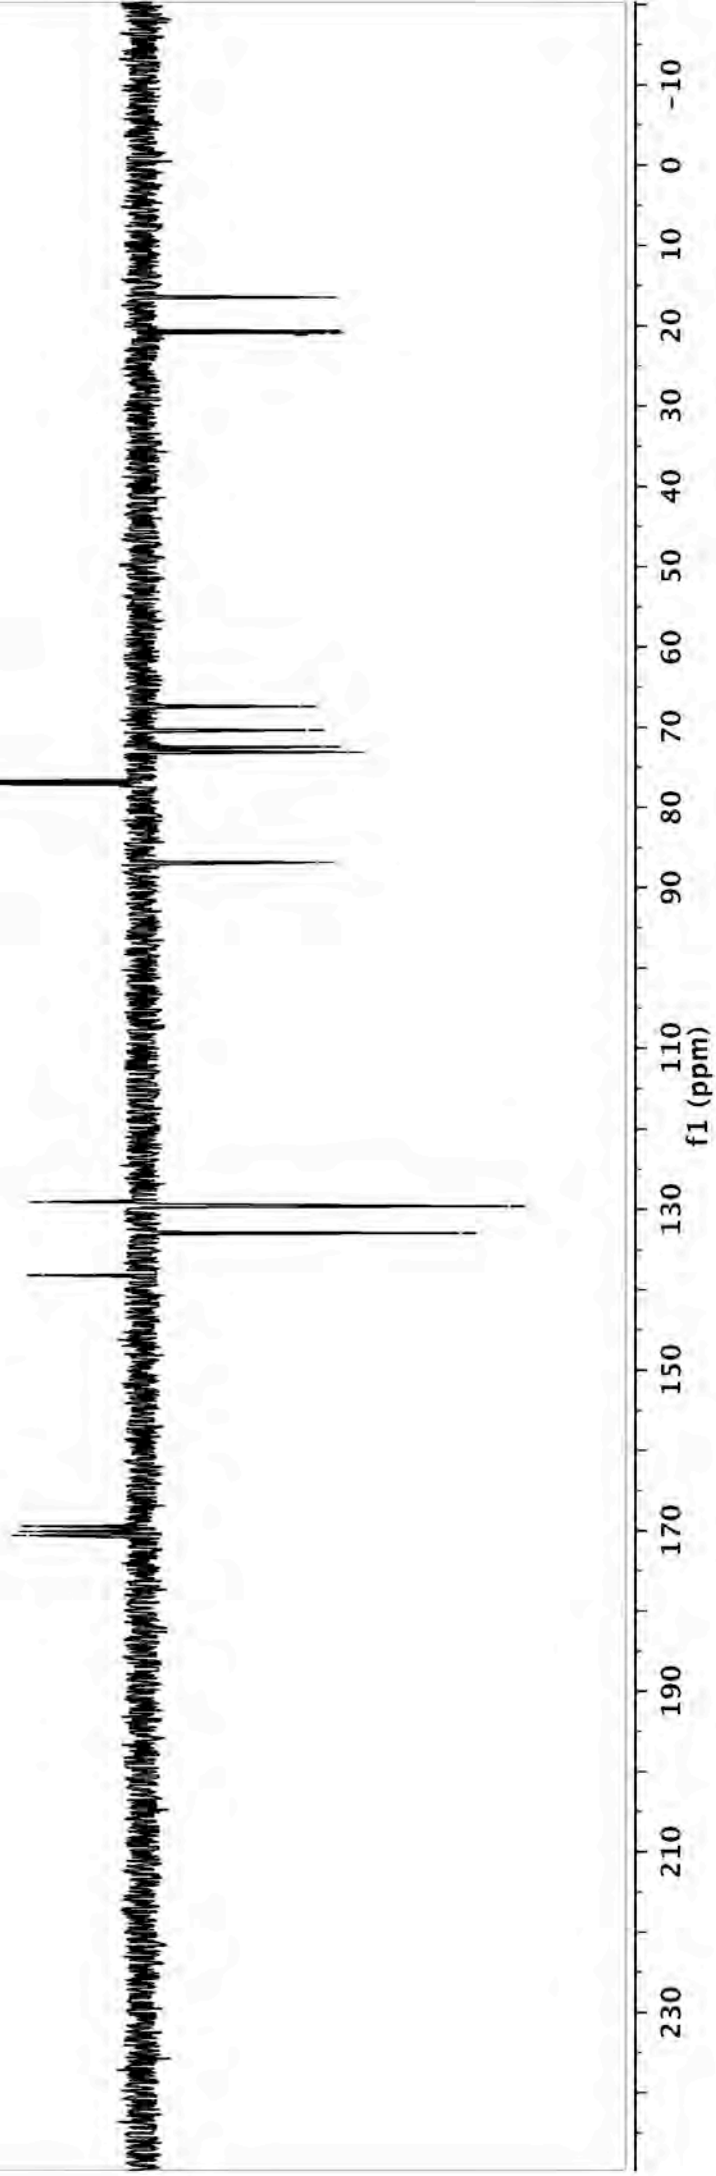

<sup>1</sup>H NMR of compound S21

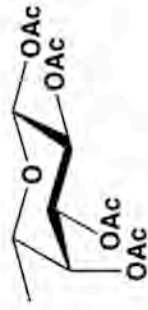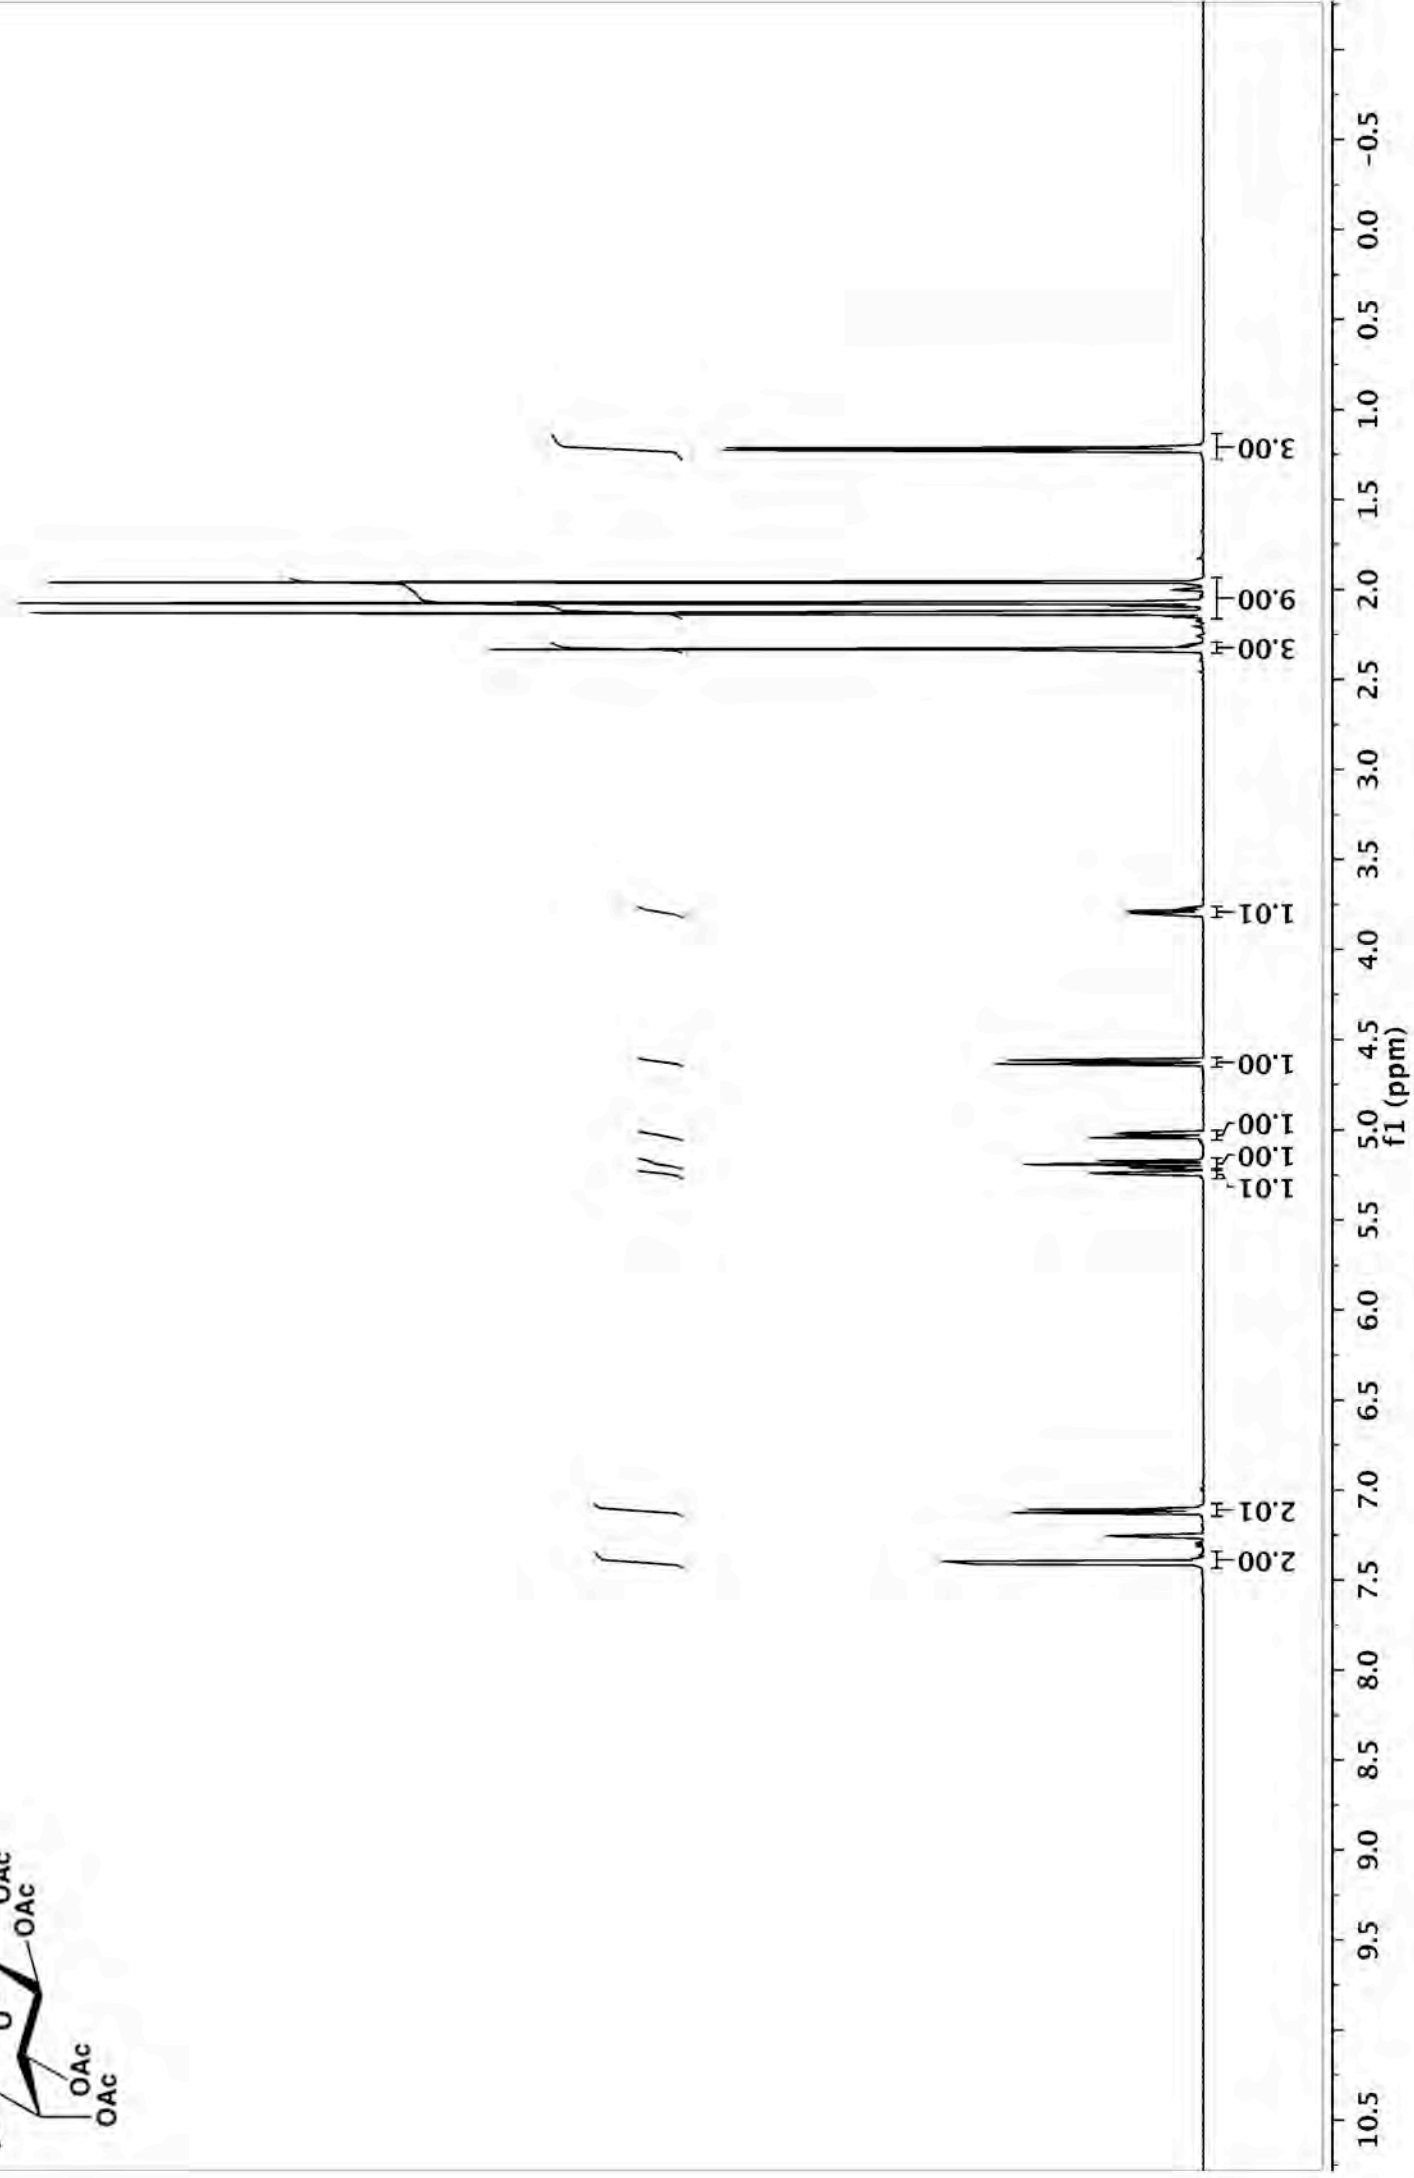

<sup>13</sup>C NMR of compound S22

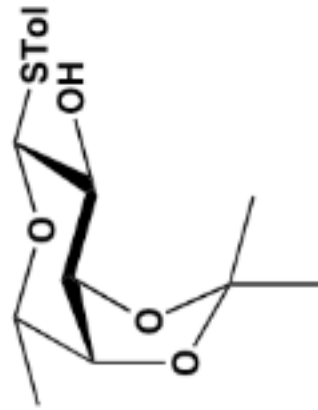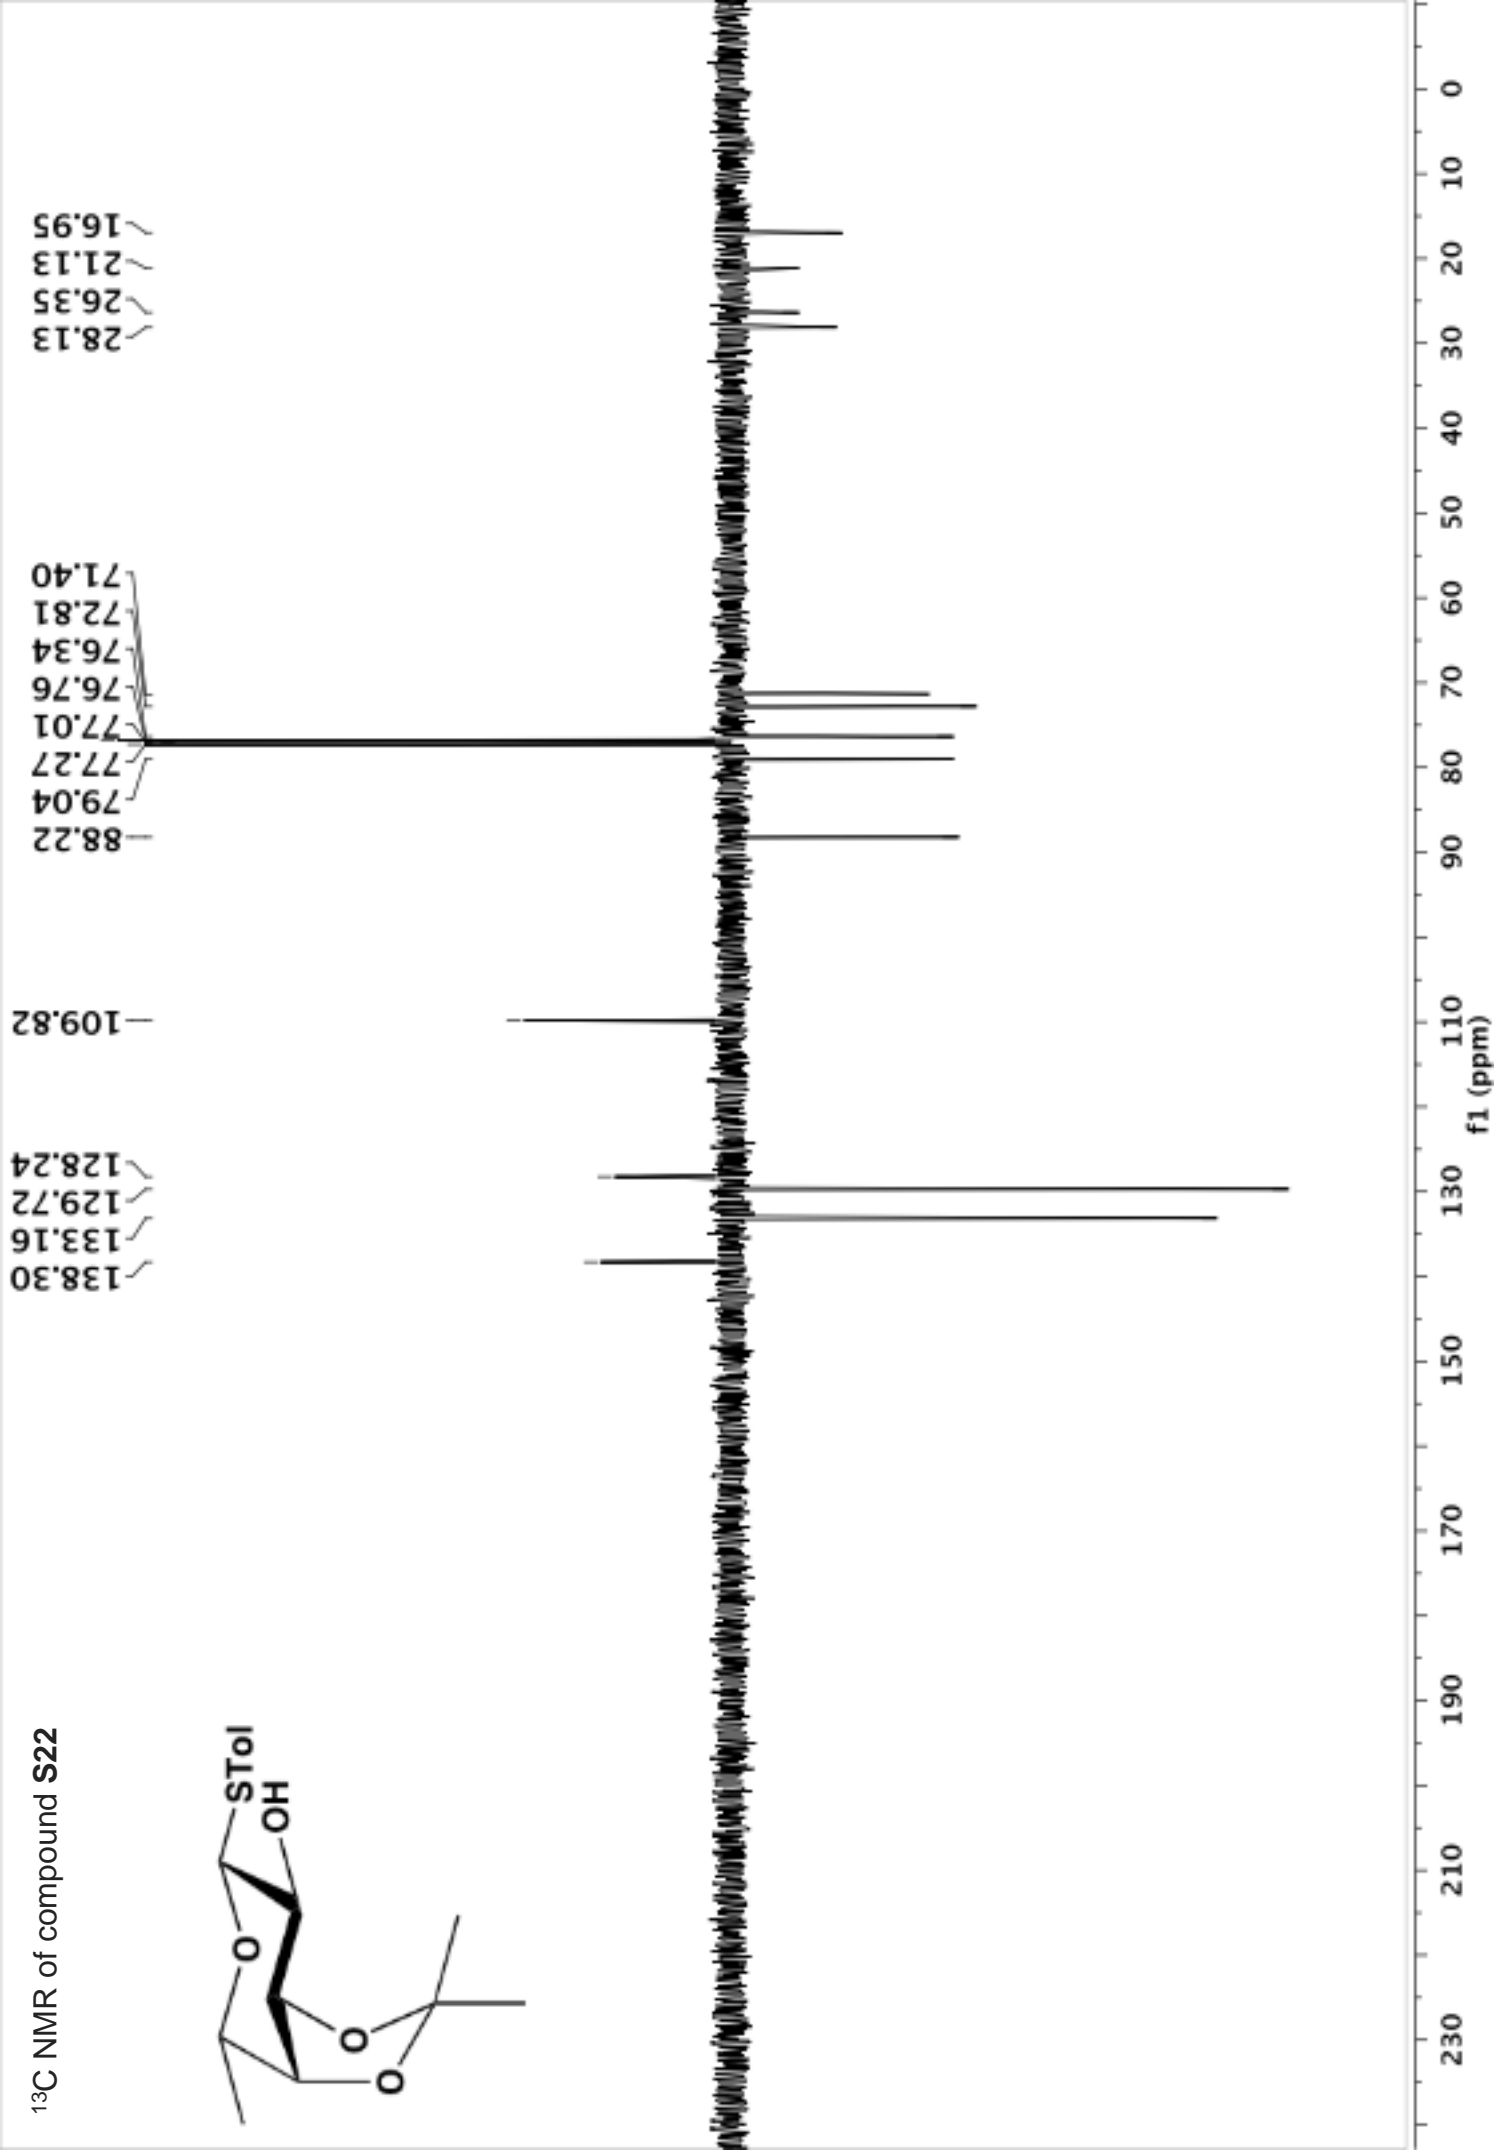

<sup>1</sup>H NMR of compound

**S22**

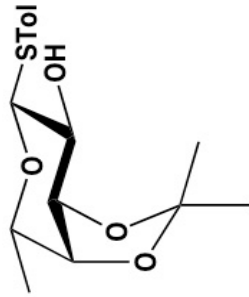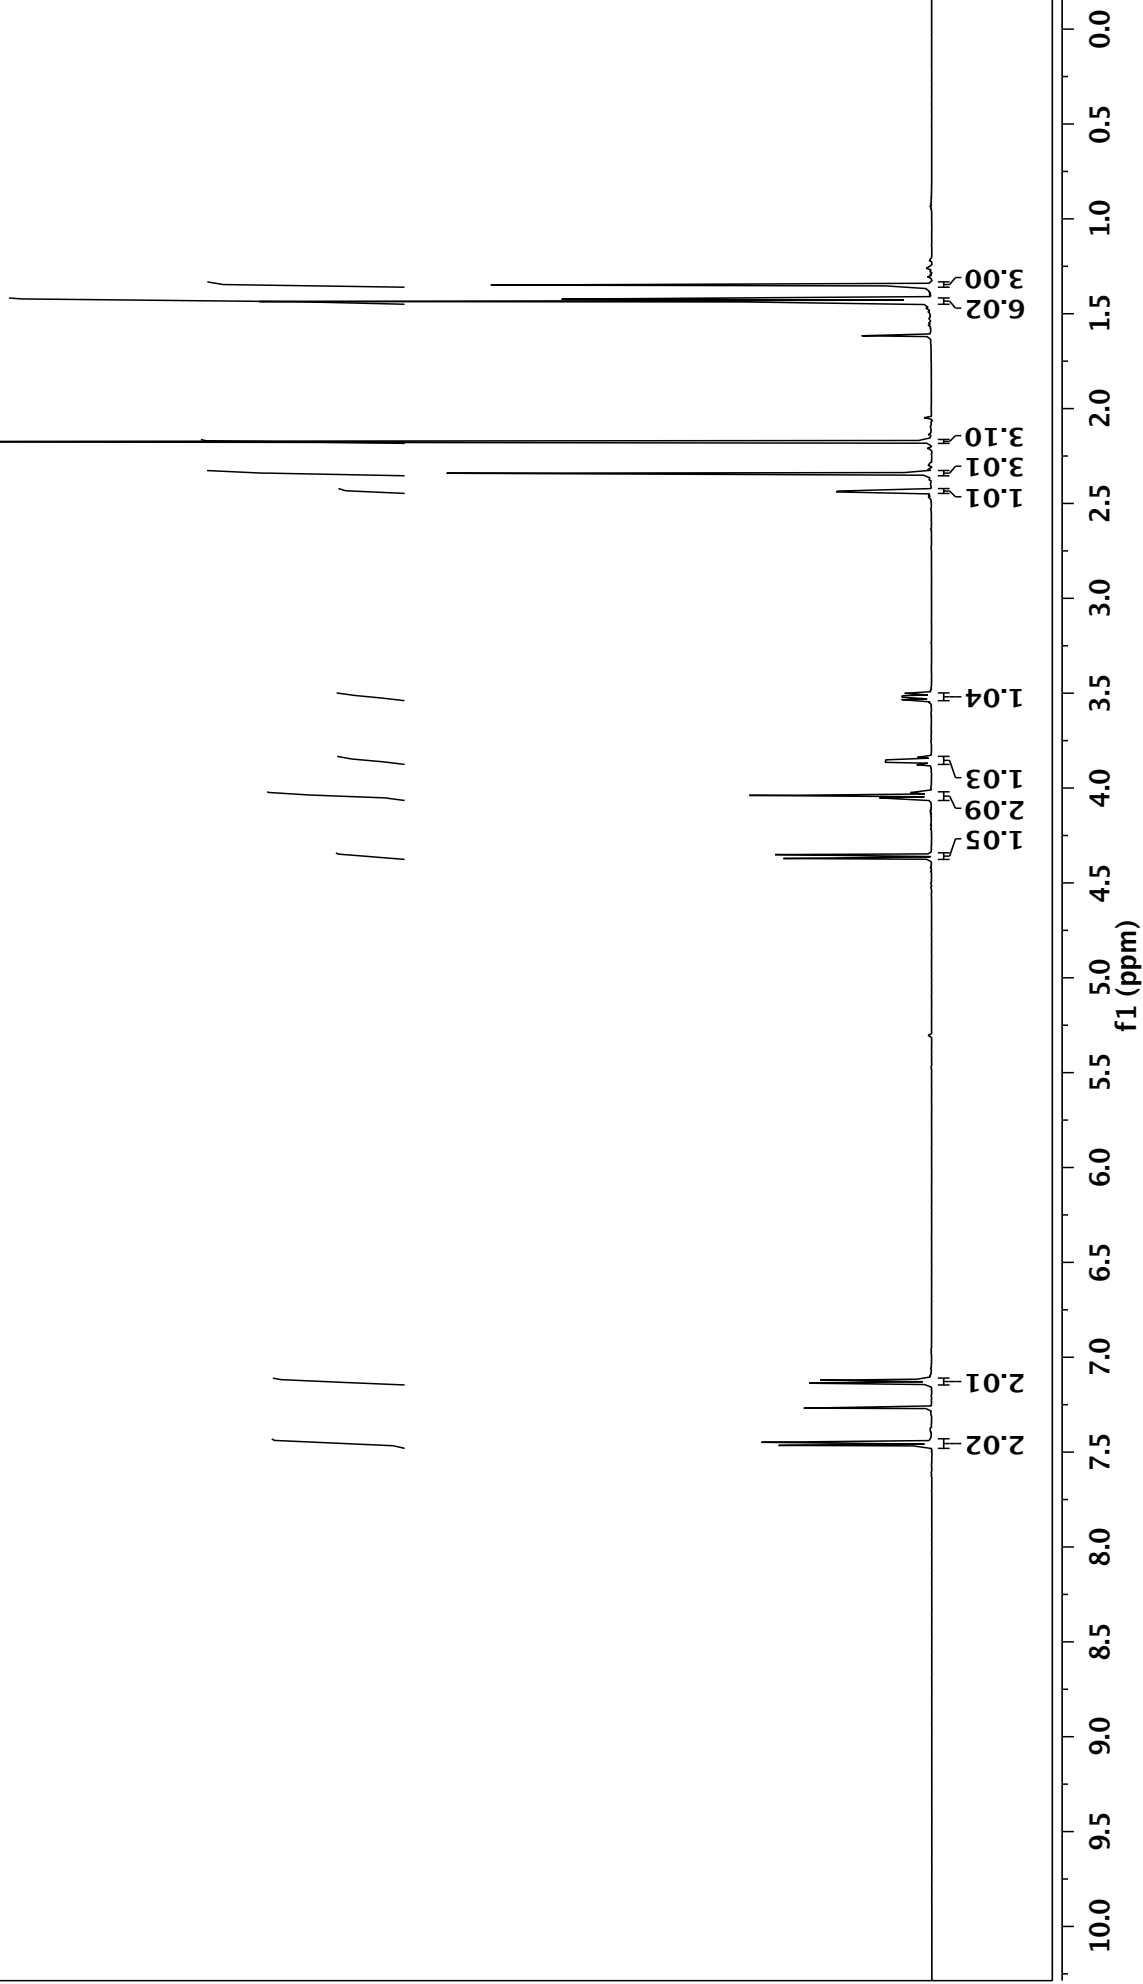

<sup>13</sup>C NMR of compound S23

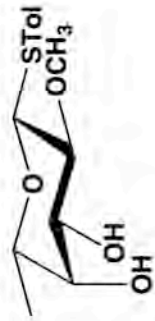

137.74  
132.52  
129.82  
129.62

87.46  
79.98  
77.28  
77.02  
76.77  
75.47  
74.39  
71.87  
61.23

21.12  
16.59

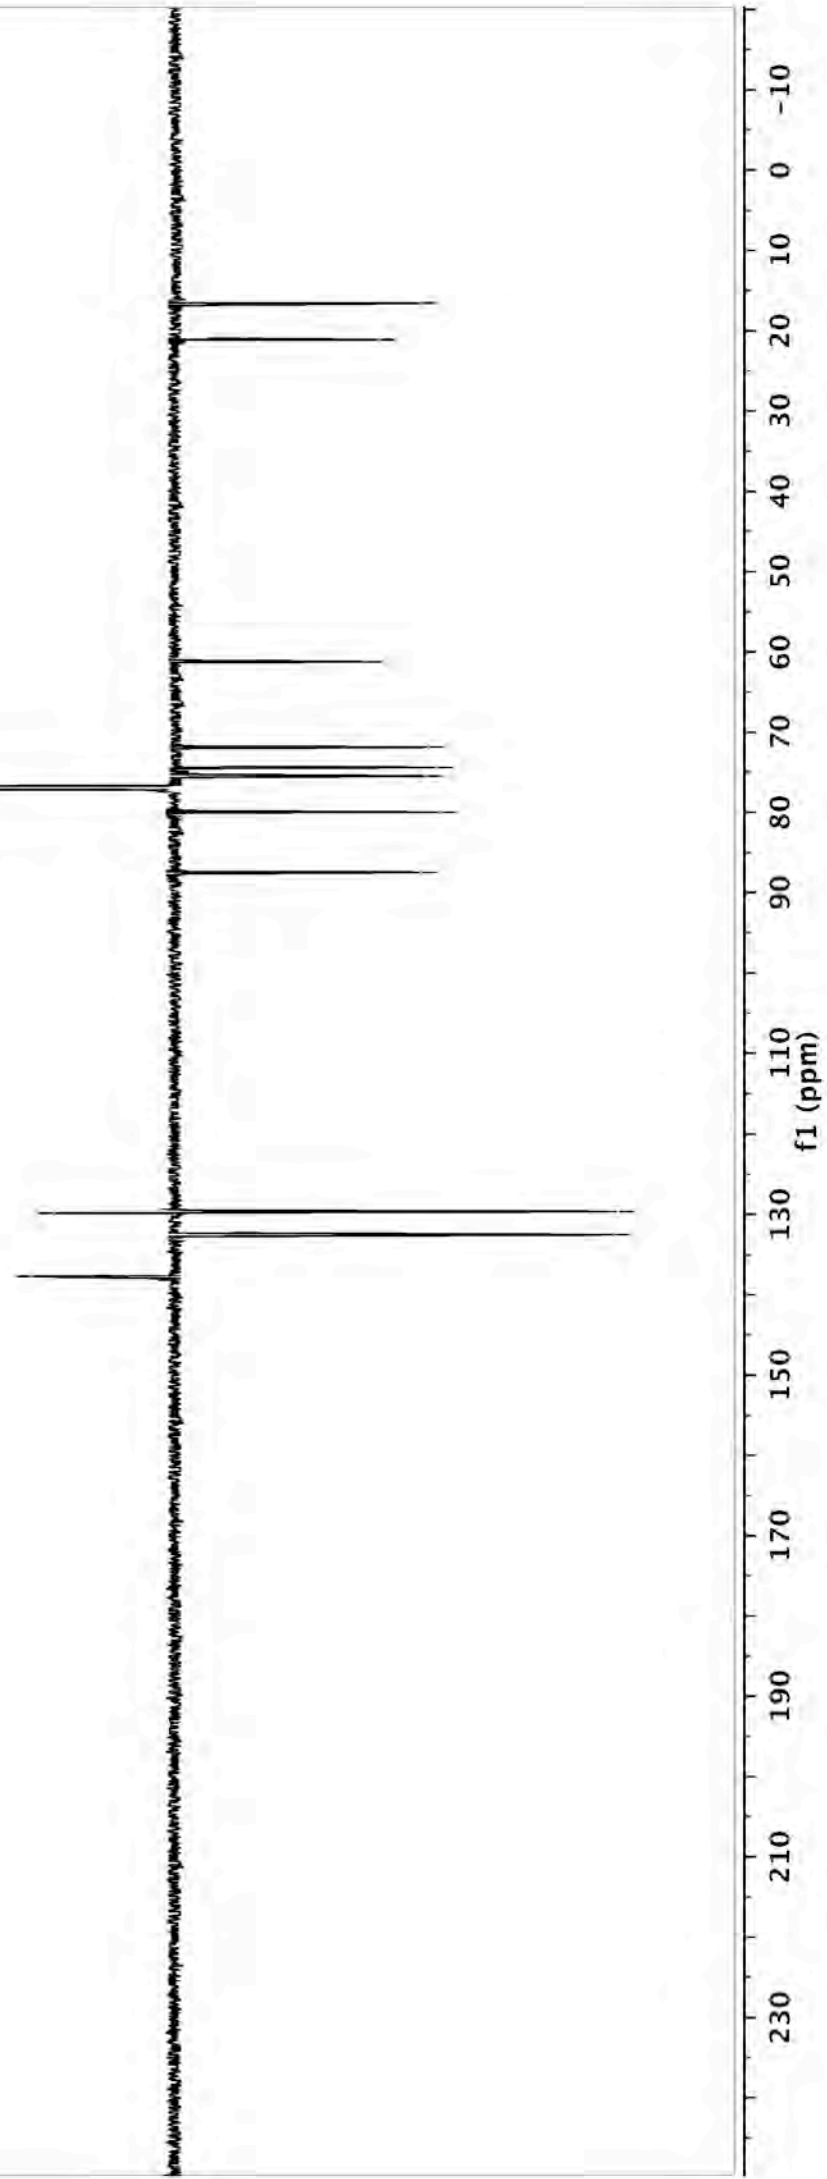



<sup>1</sup>H NMR of compound S23

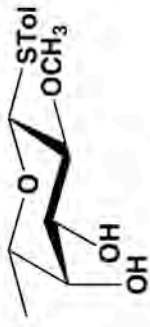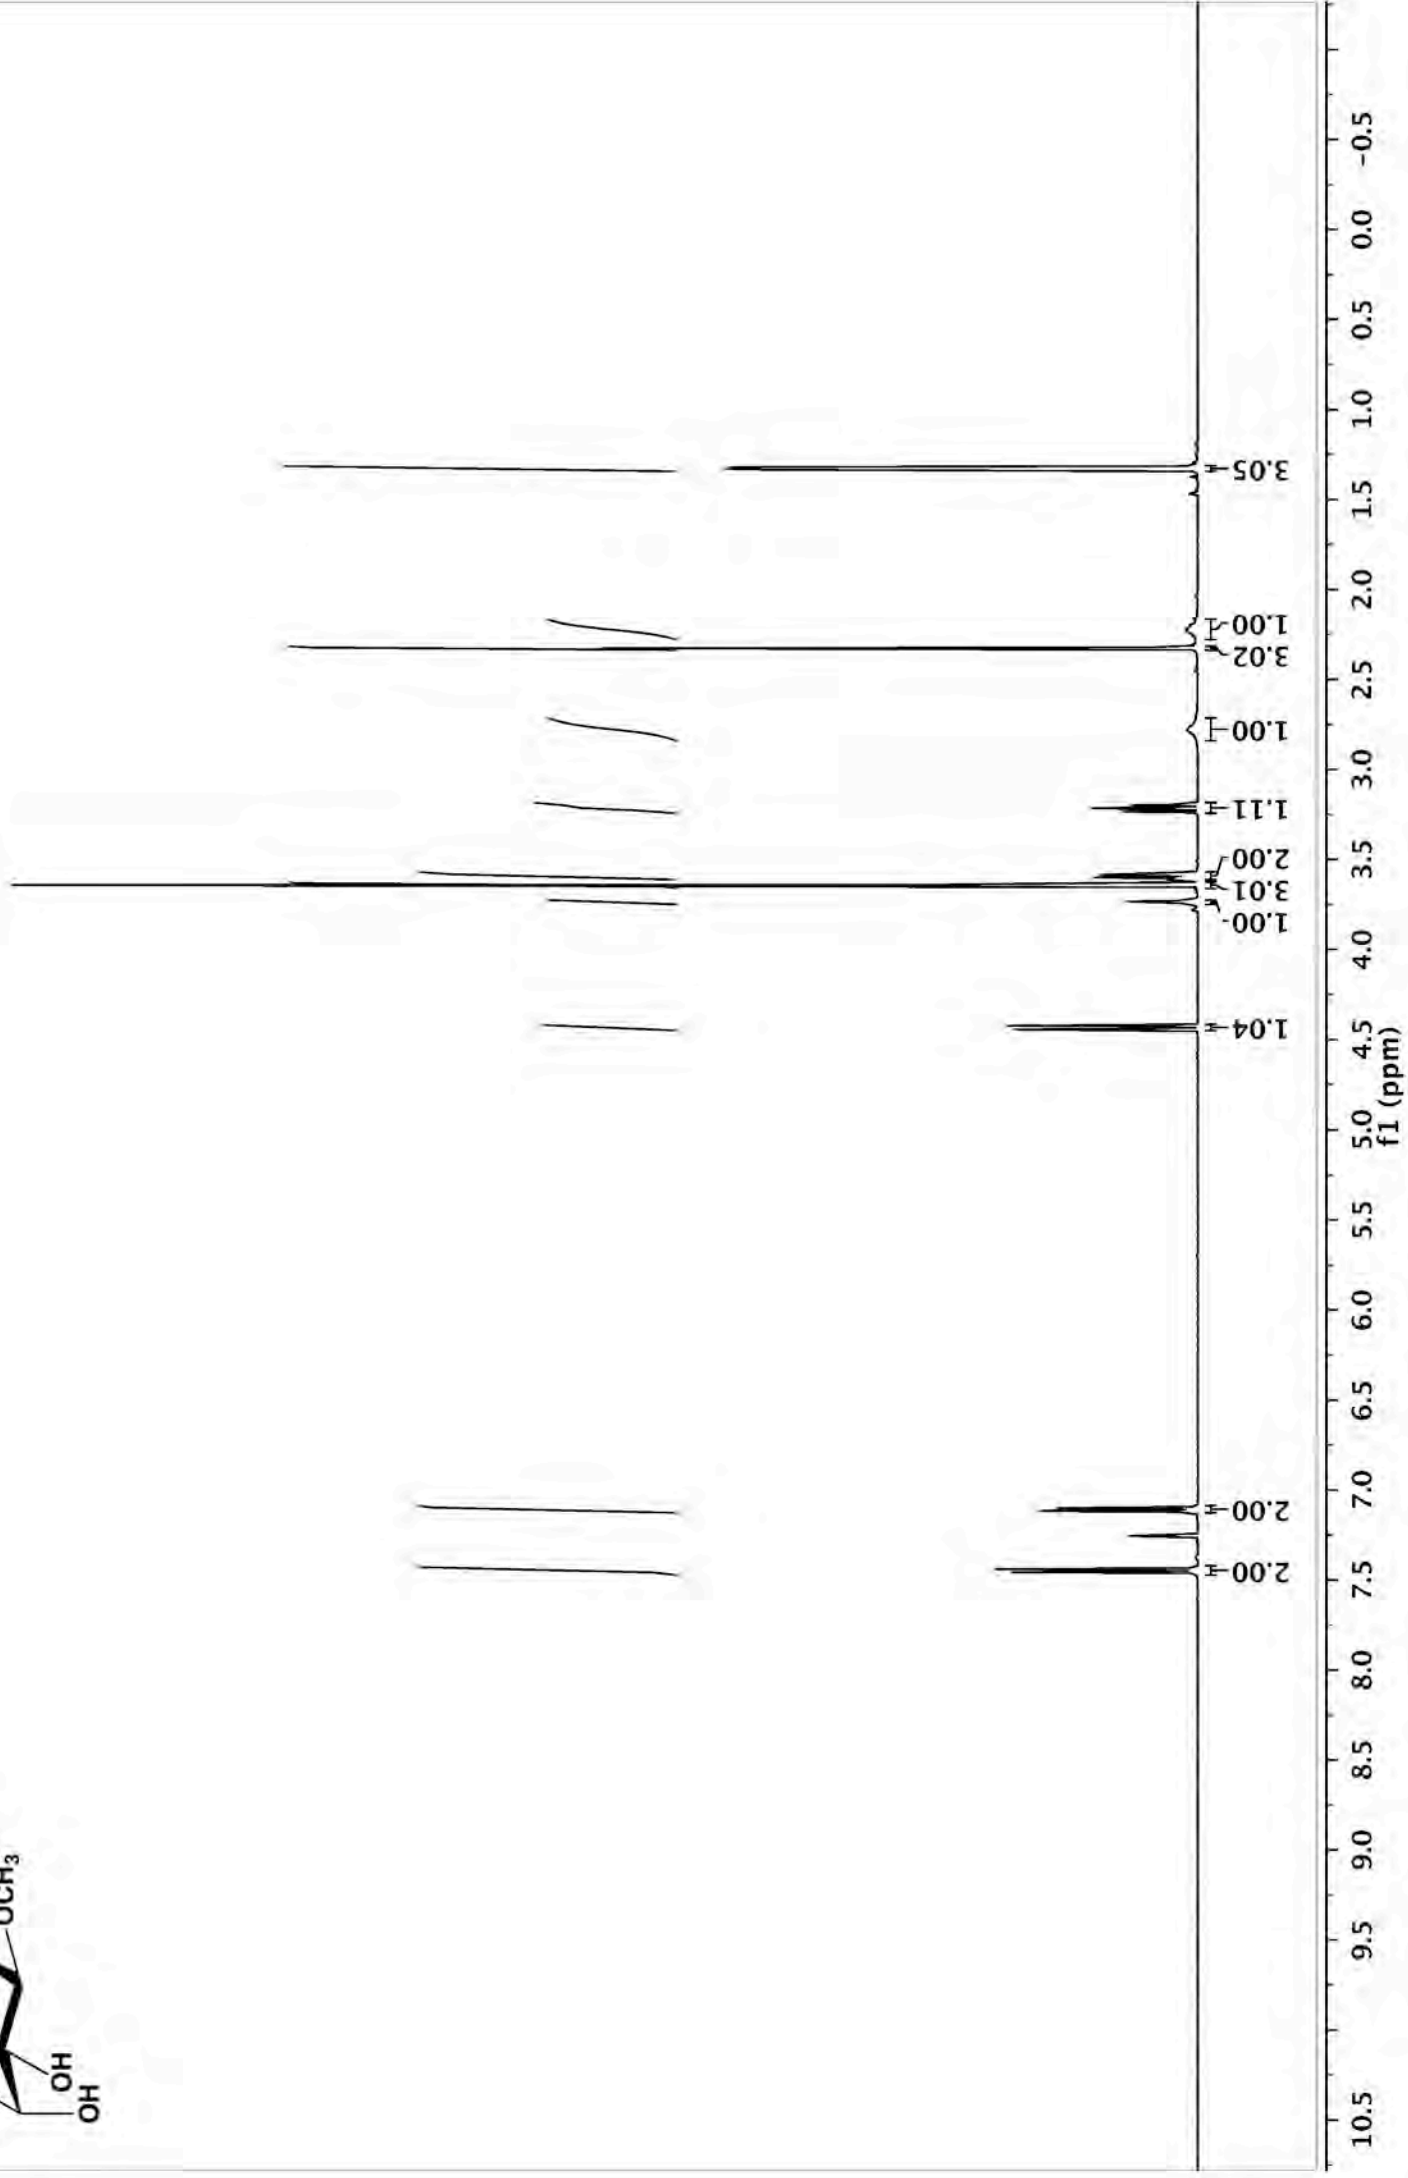

<sup>13</sup>C NMR of compound S24

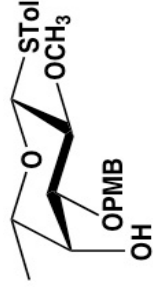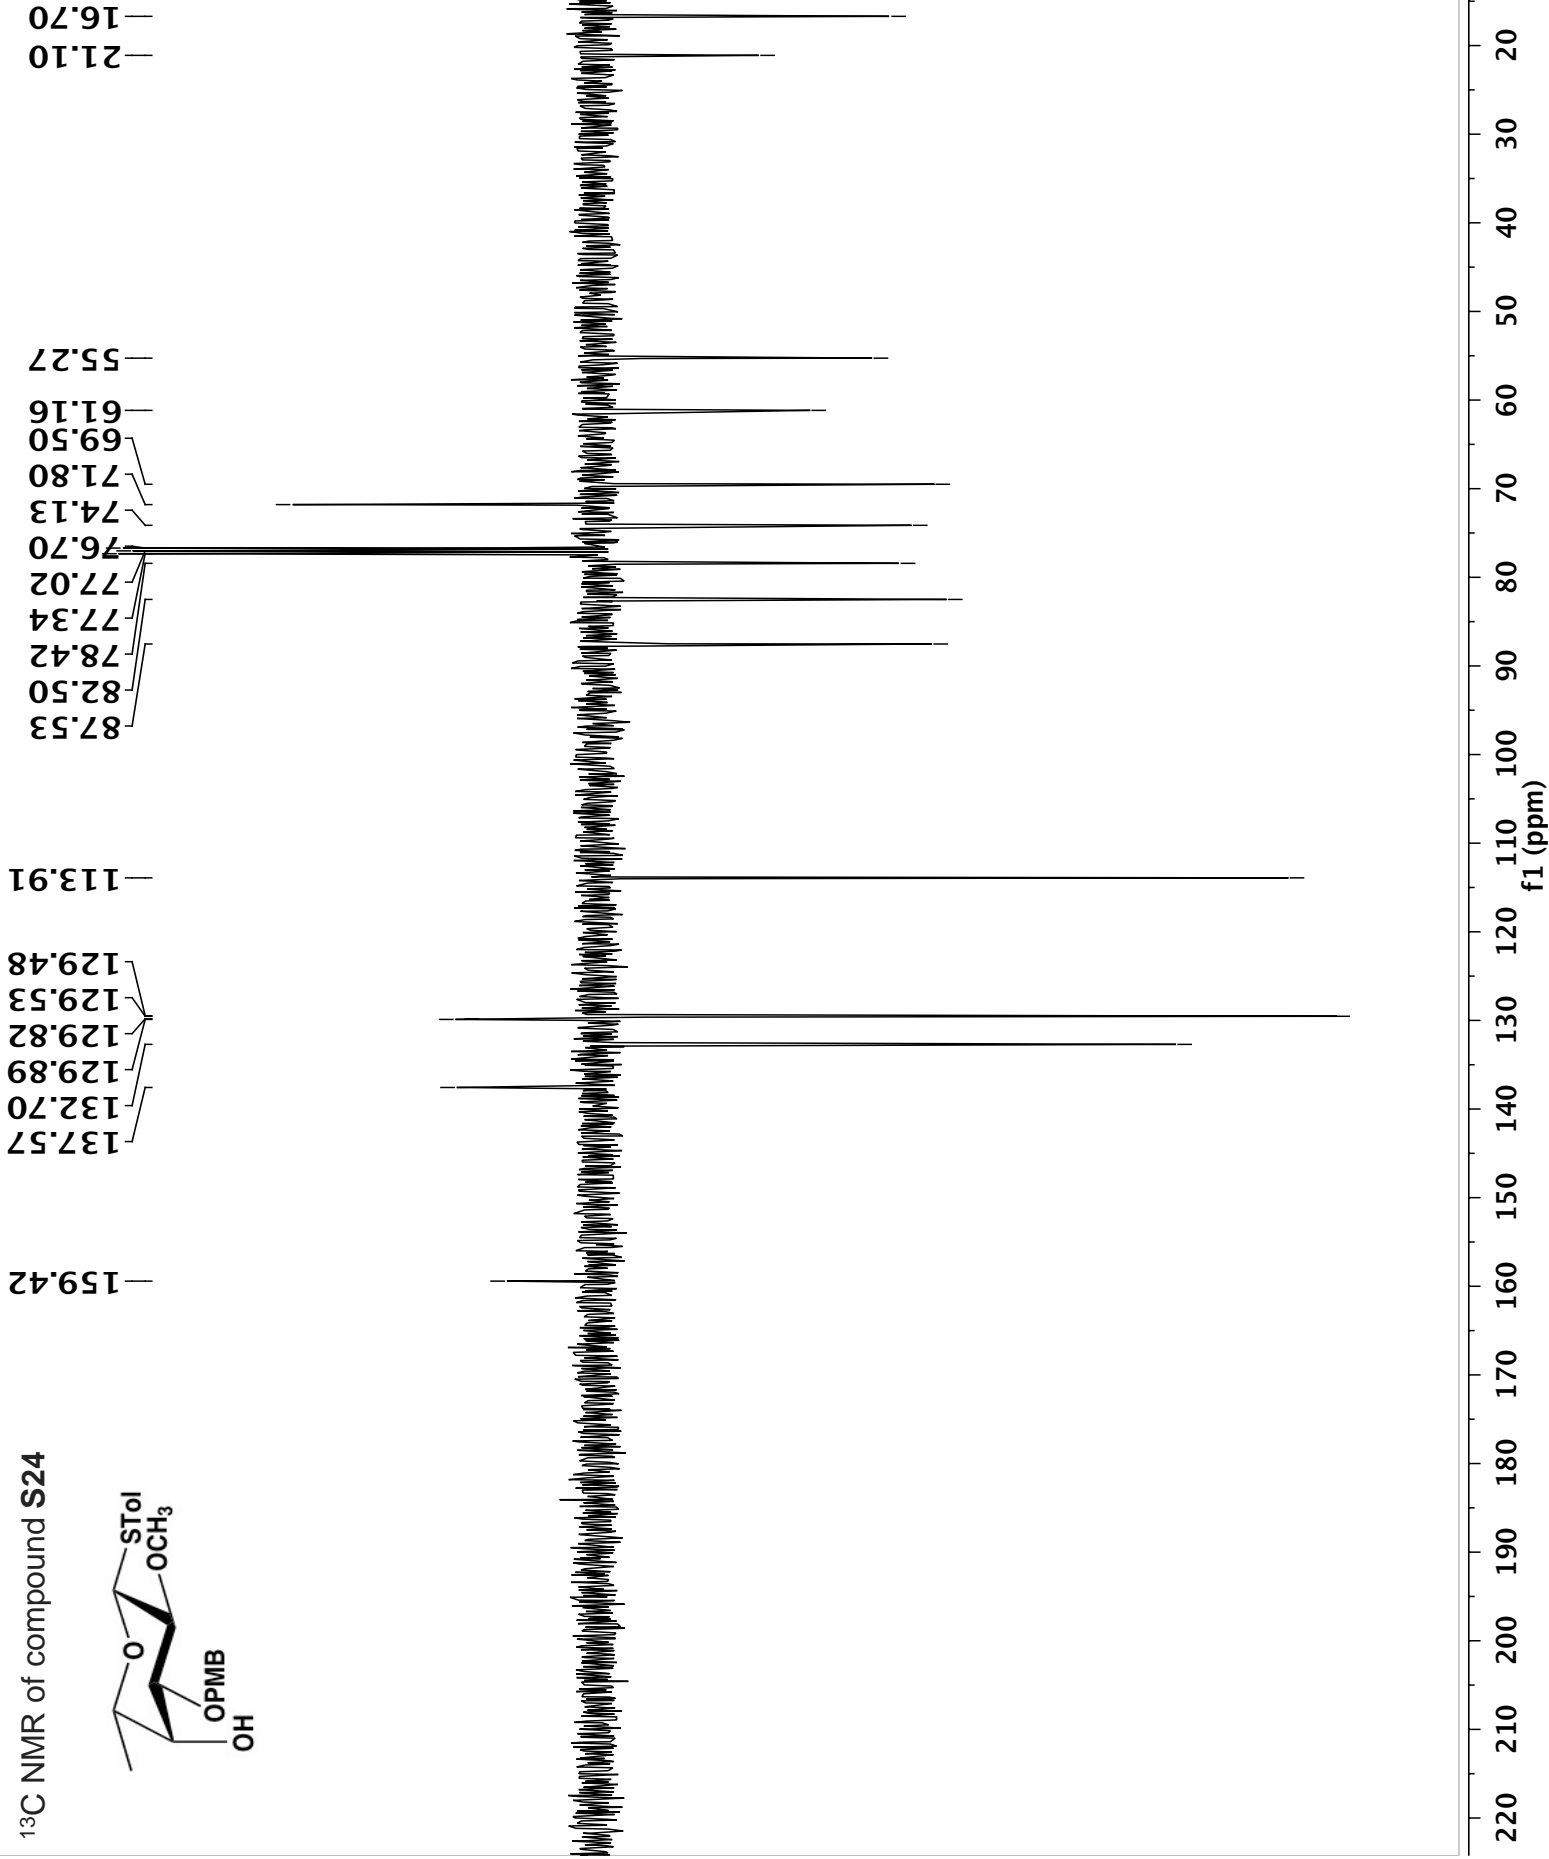



<sup>13</sup>C NMR of compound S25

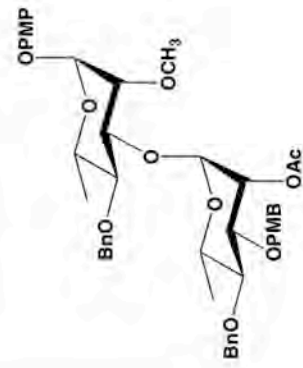

- 170.07
- 159.24
- 154.92
- 150.42
- 129.72
- 128.45
- 128.37
- 127.96
- 127.52
- 117.95
- 114.63
- 113.76
- 99.82
- 95.60
- 80.12
- 80.02
- 77.32
- 77.06
- 76.81
- 68.69
- 58.88
- 55.66
- 55.20
- 21.07
- 18.21
- 18.00

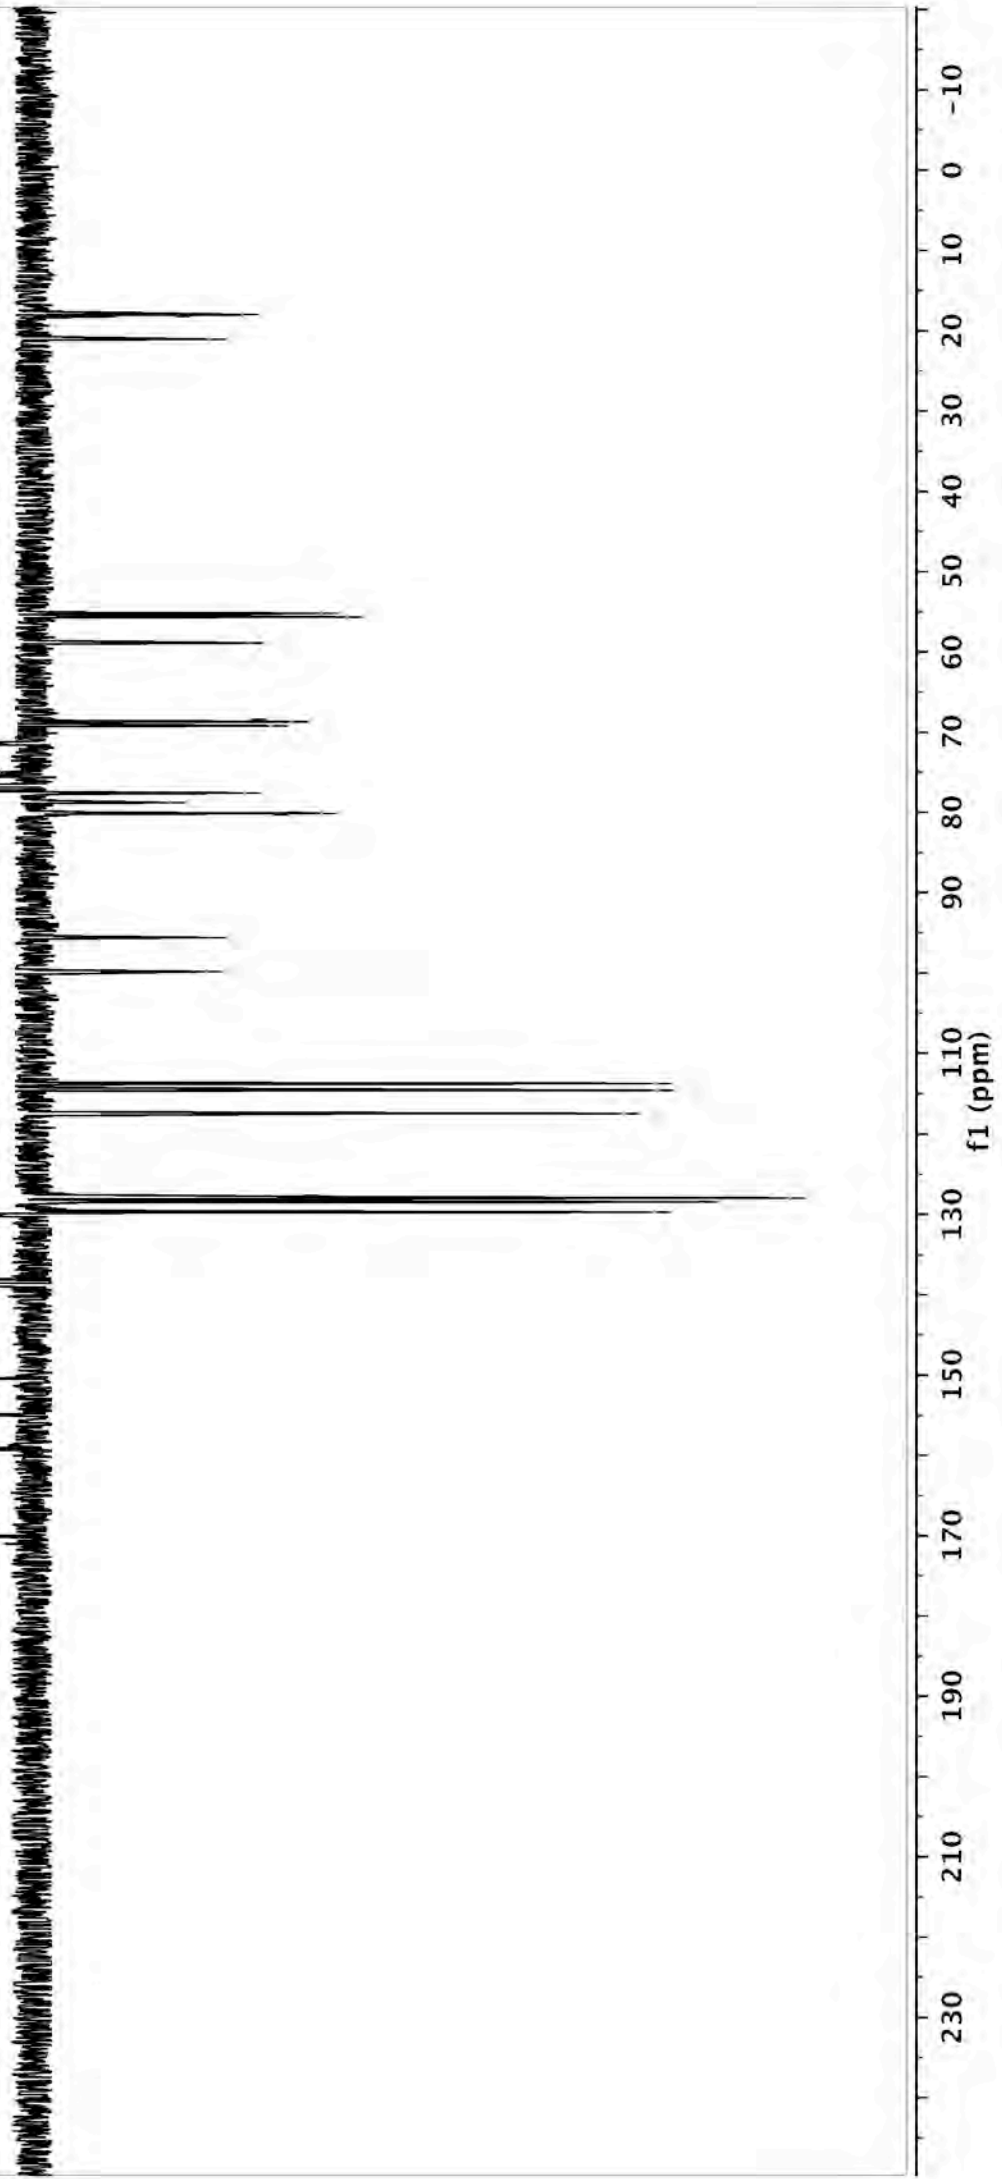

<sup>1</sup>H NMR of compound S25

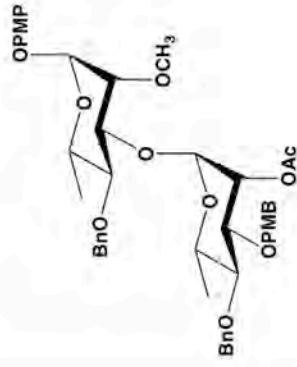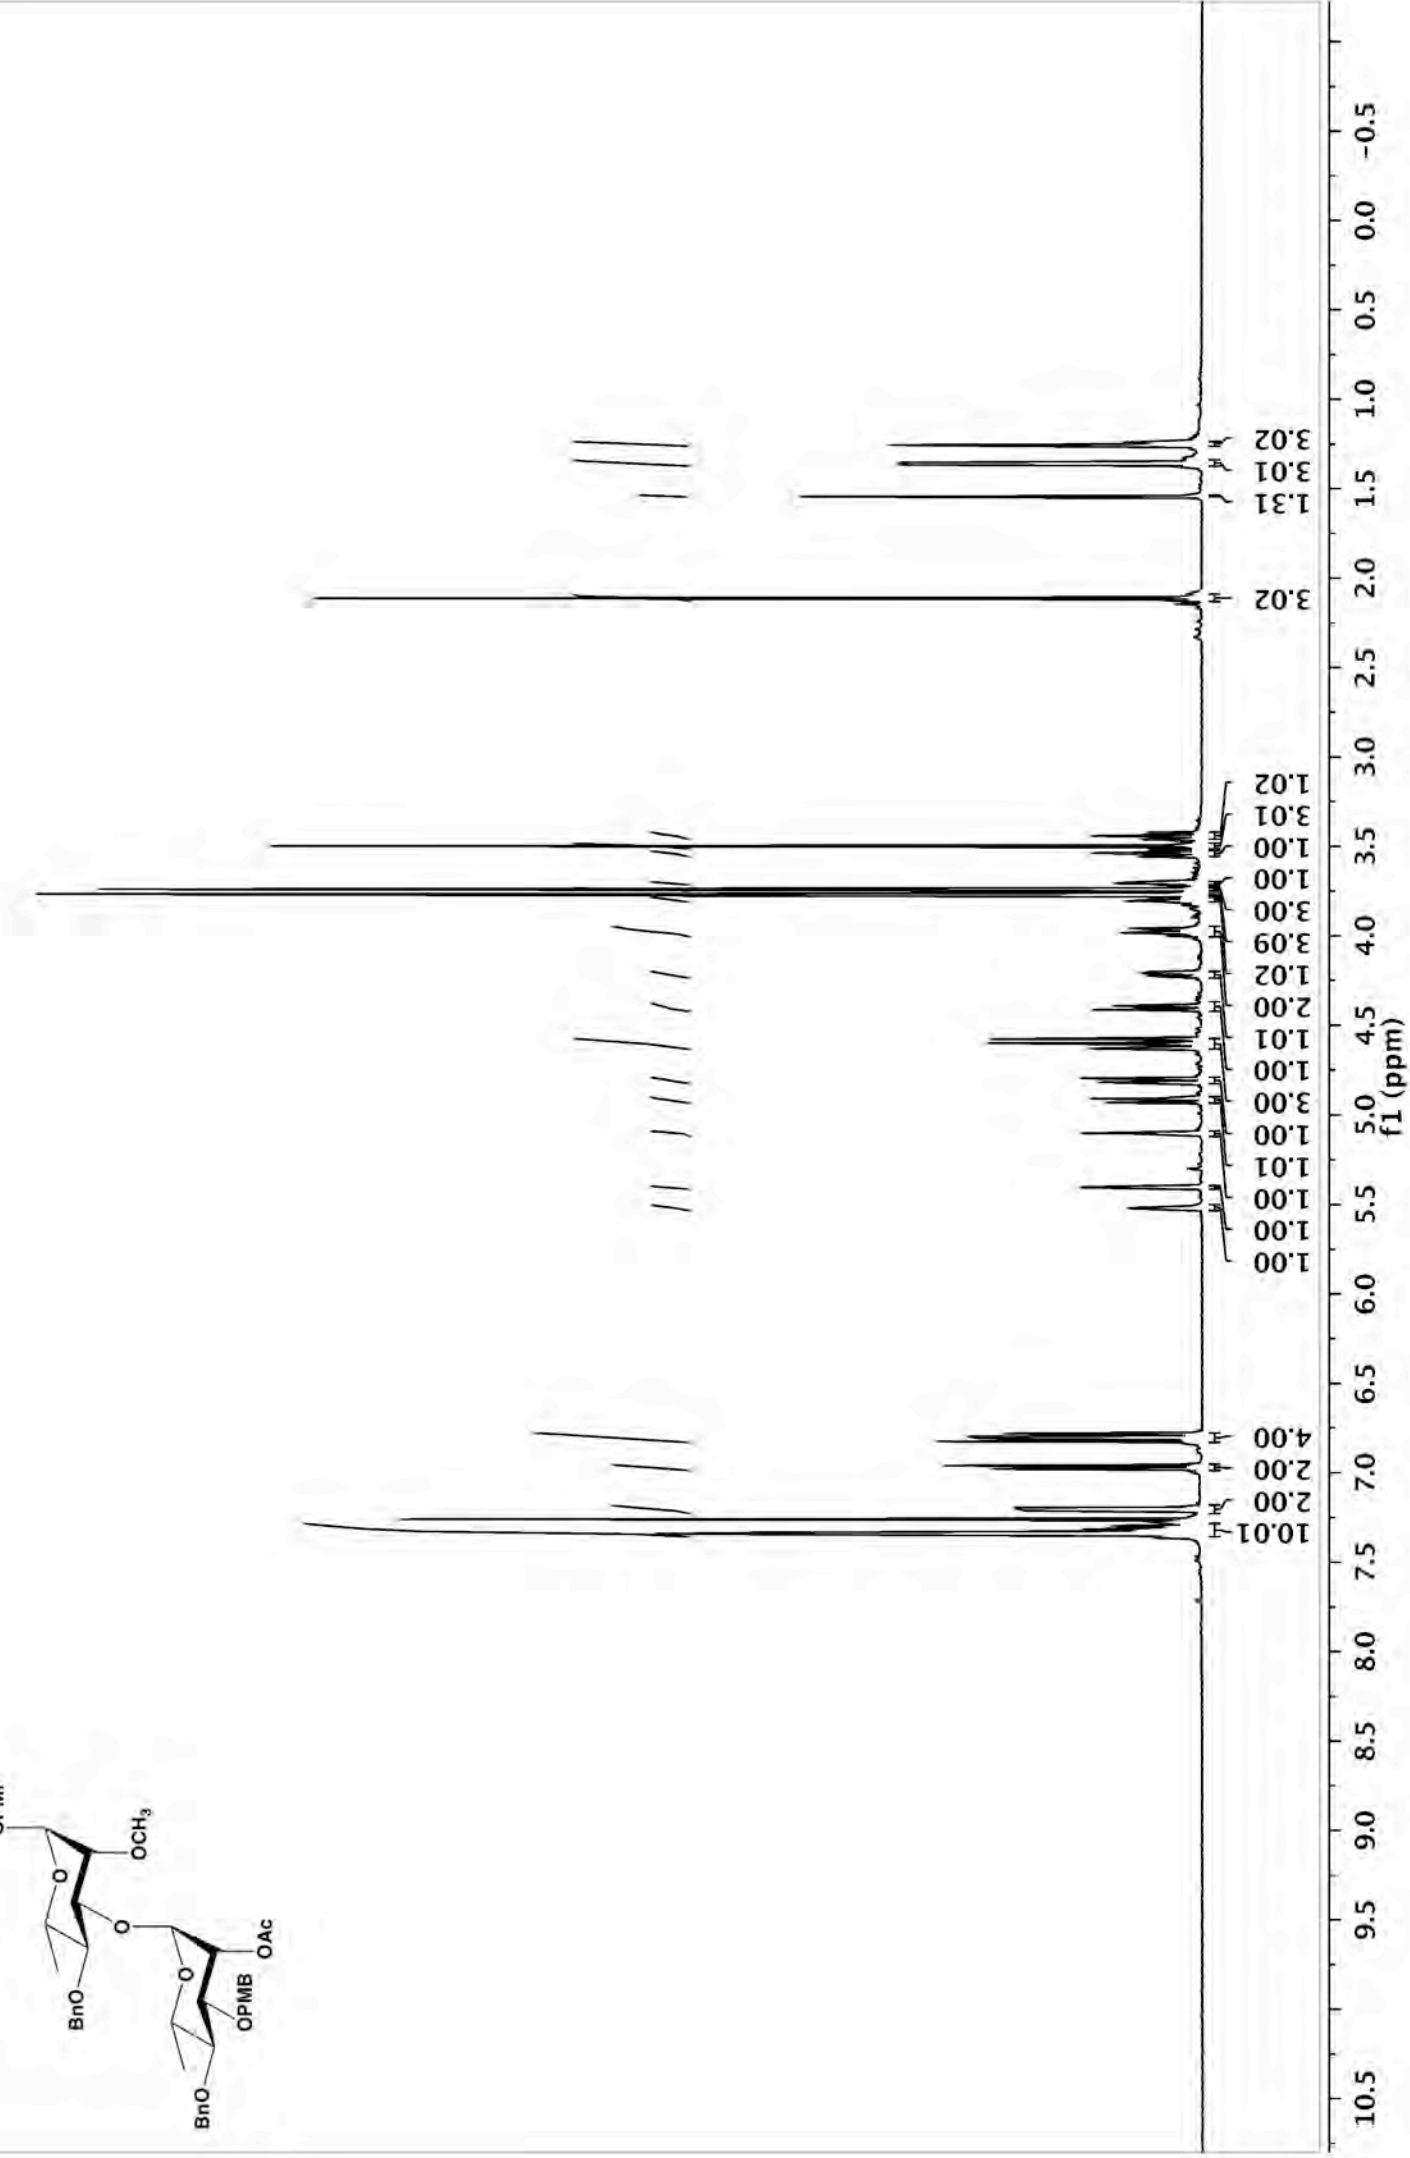

<sup>1</sup>H NMR of compound S26

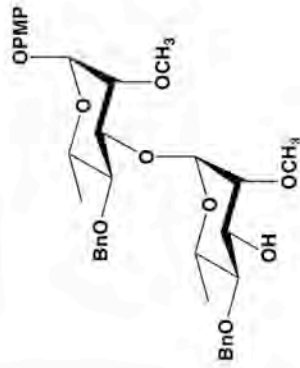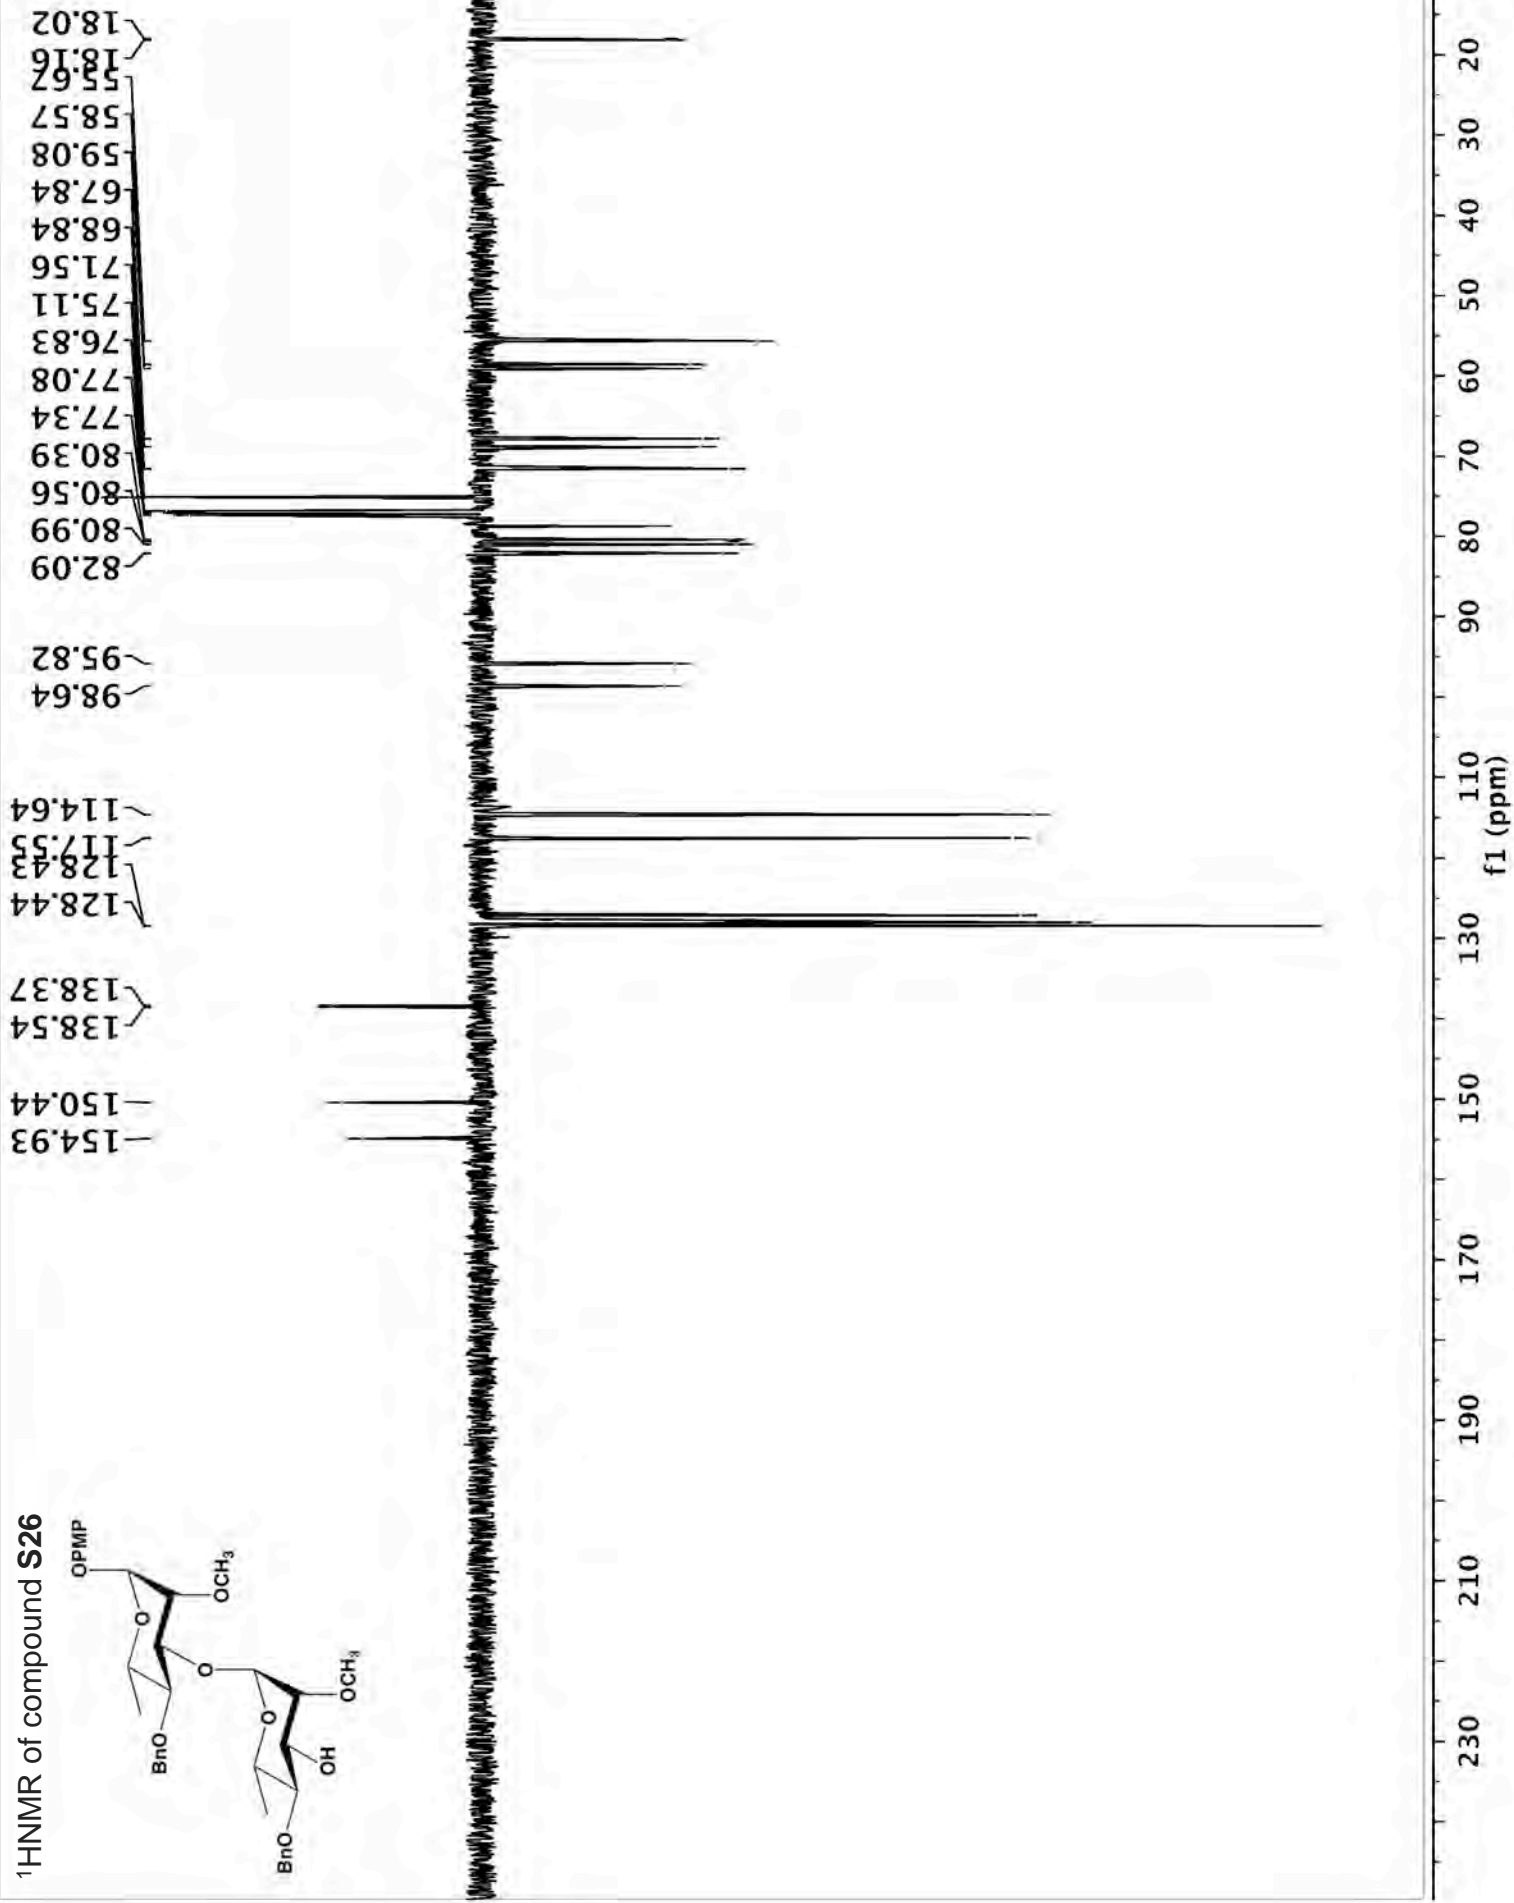



<sup>13</sup>C NMR of compound S27

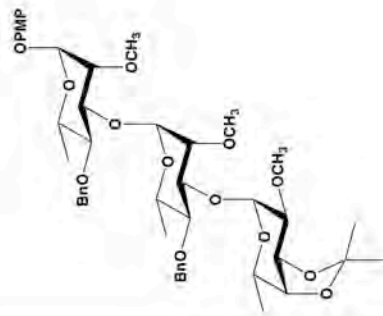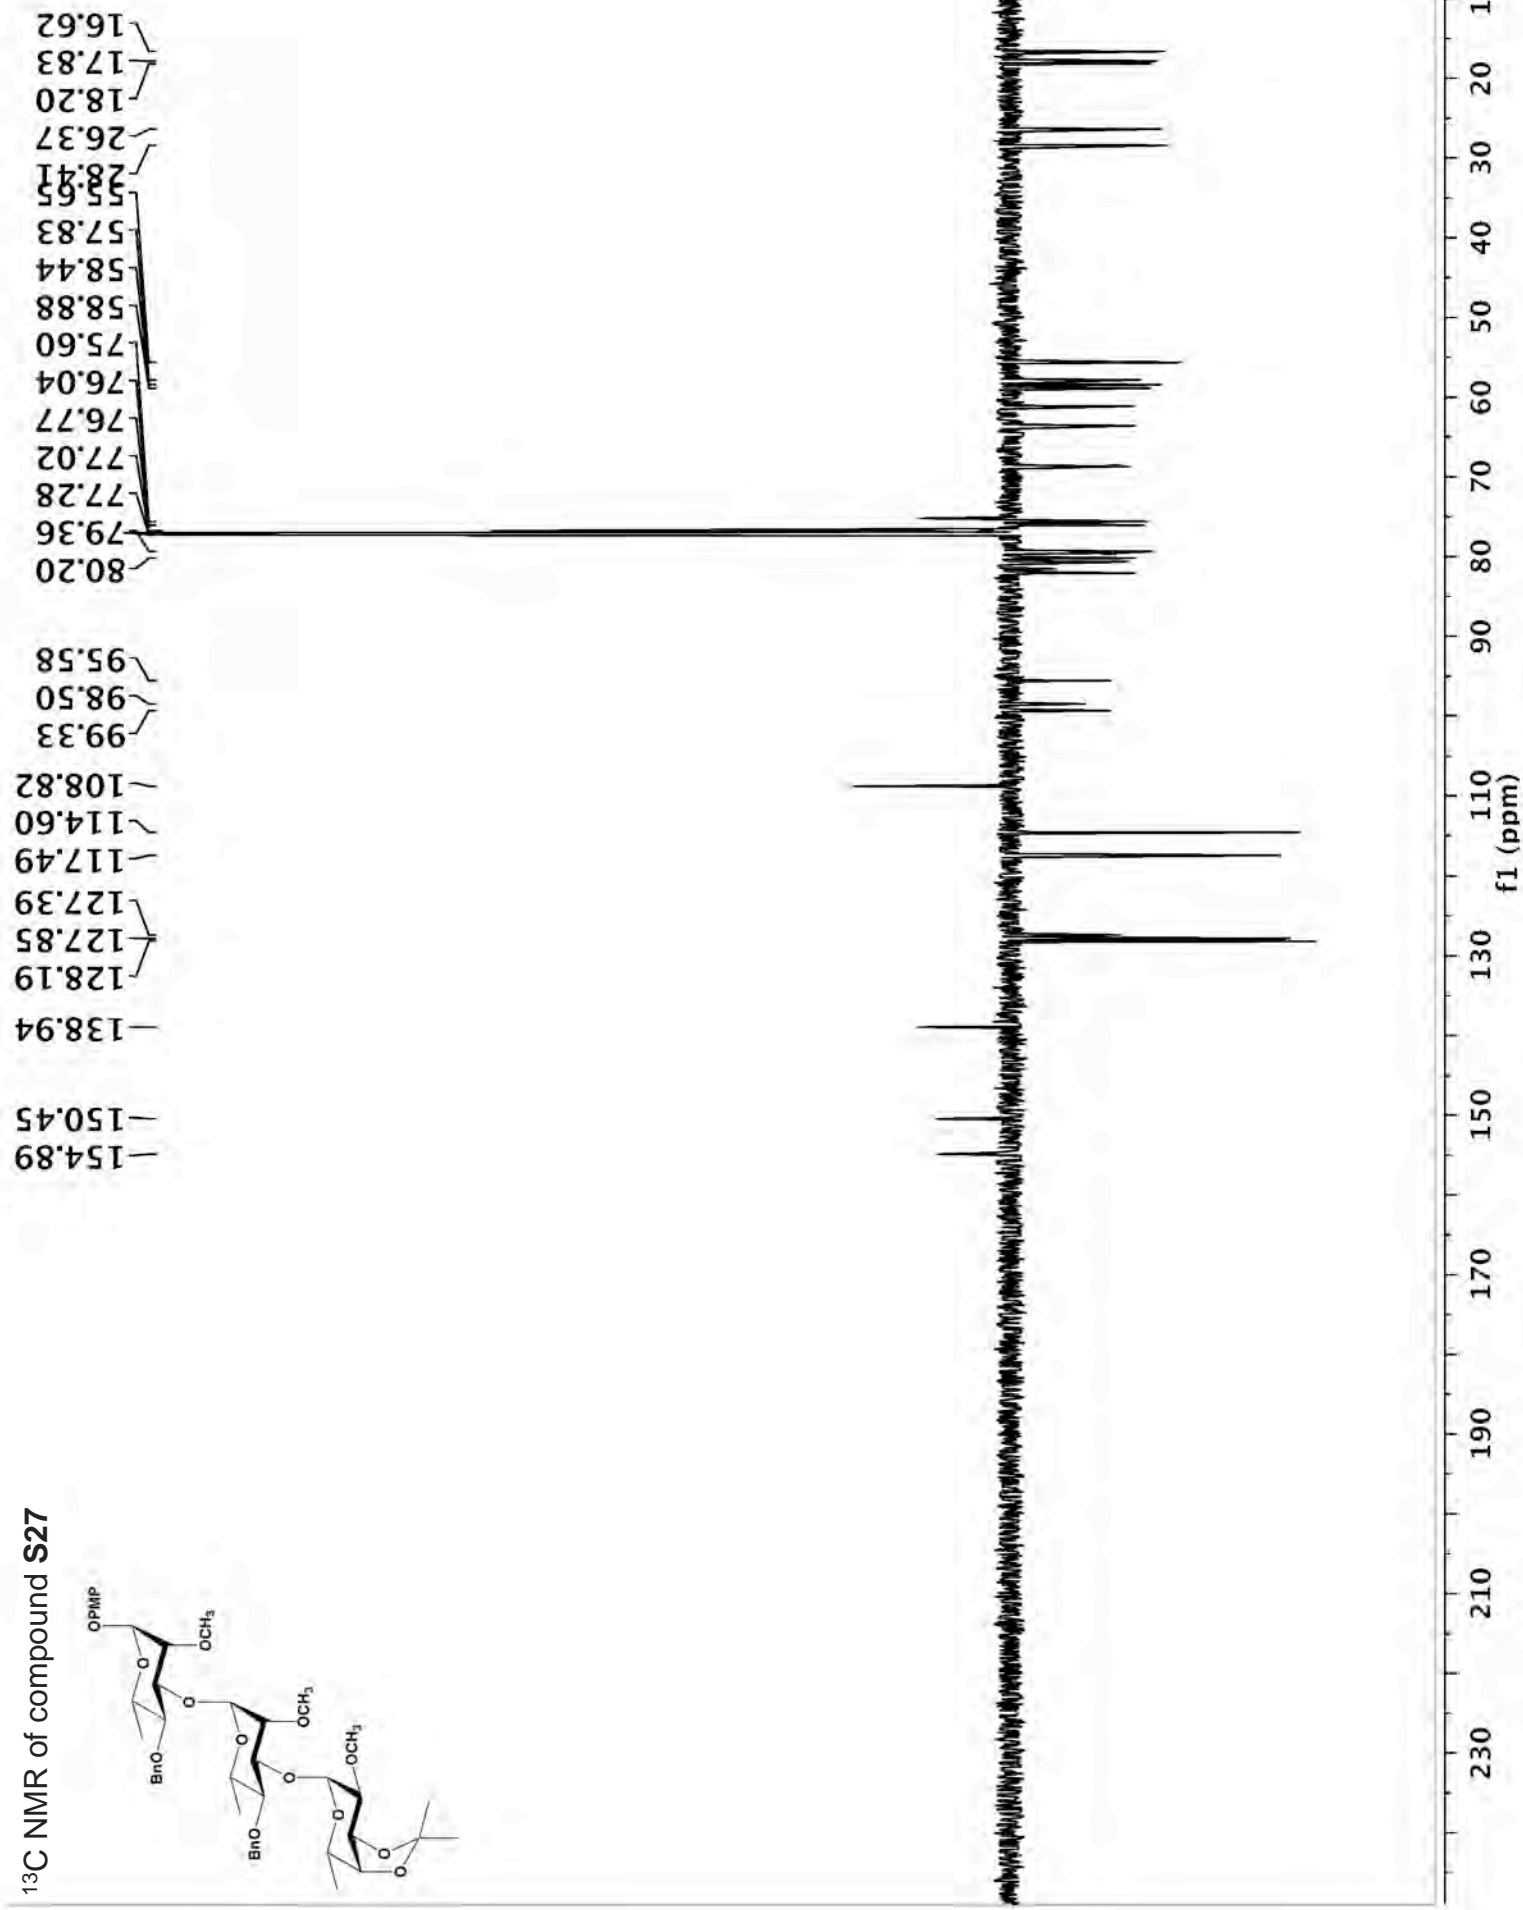



<sup>1</sup>H NMR of compound S27

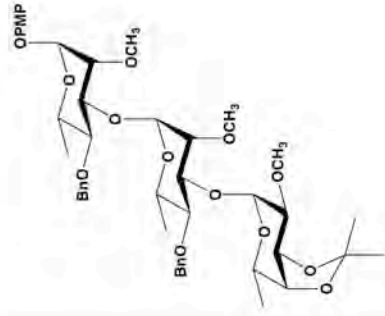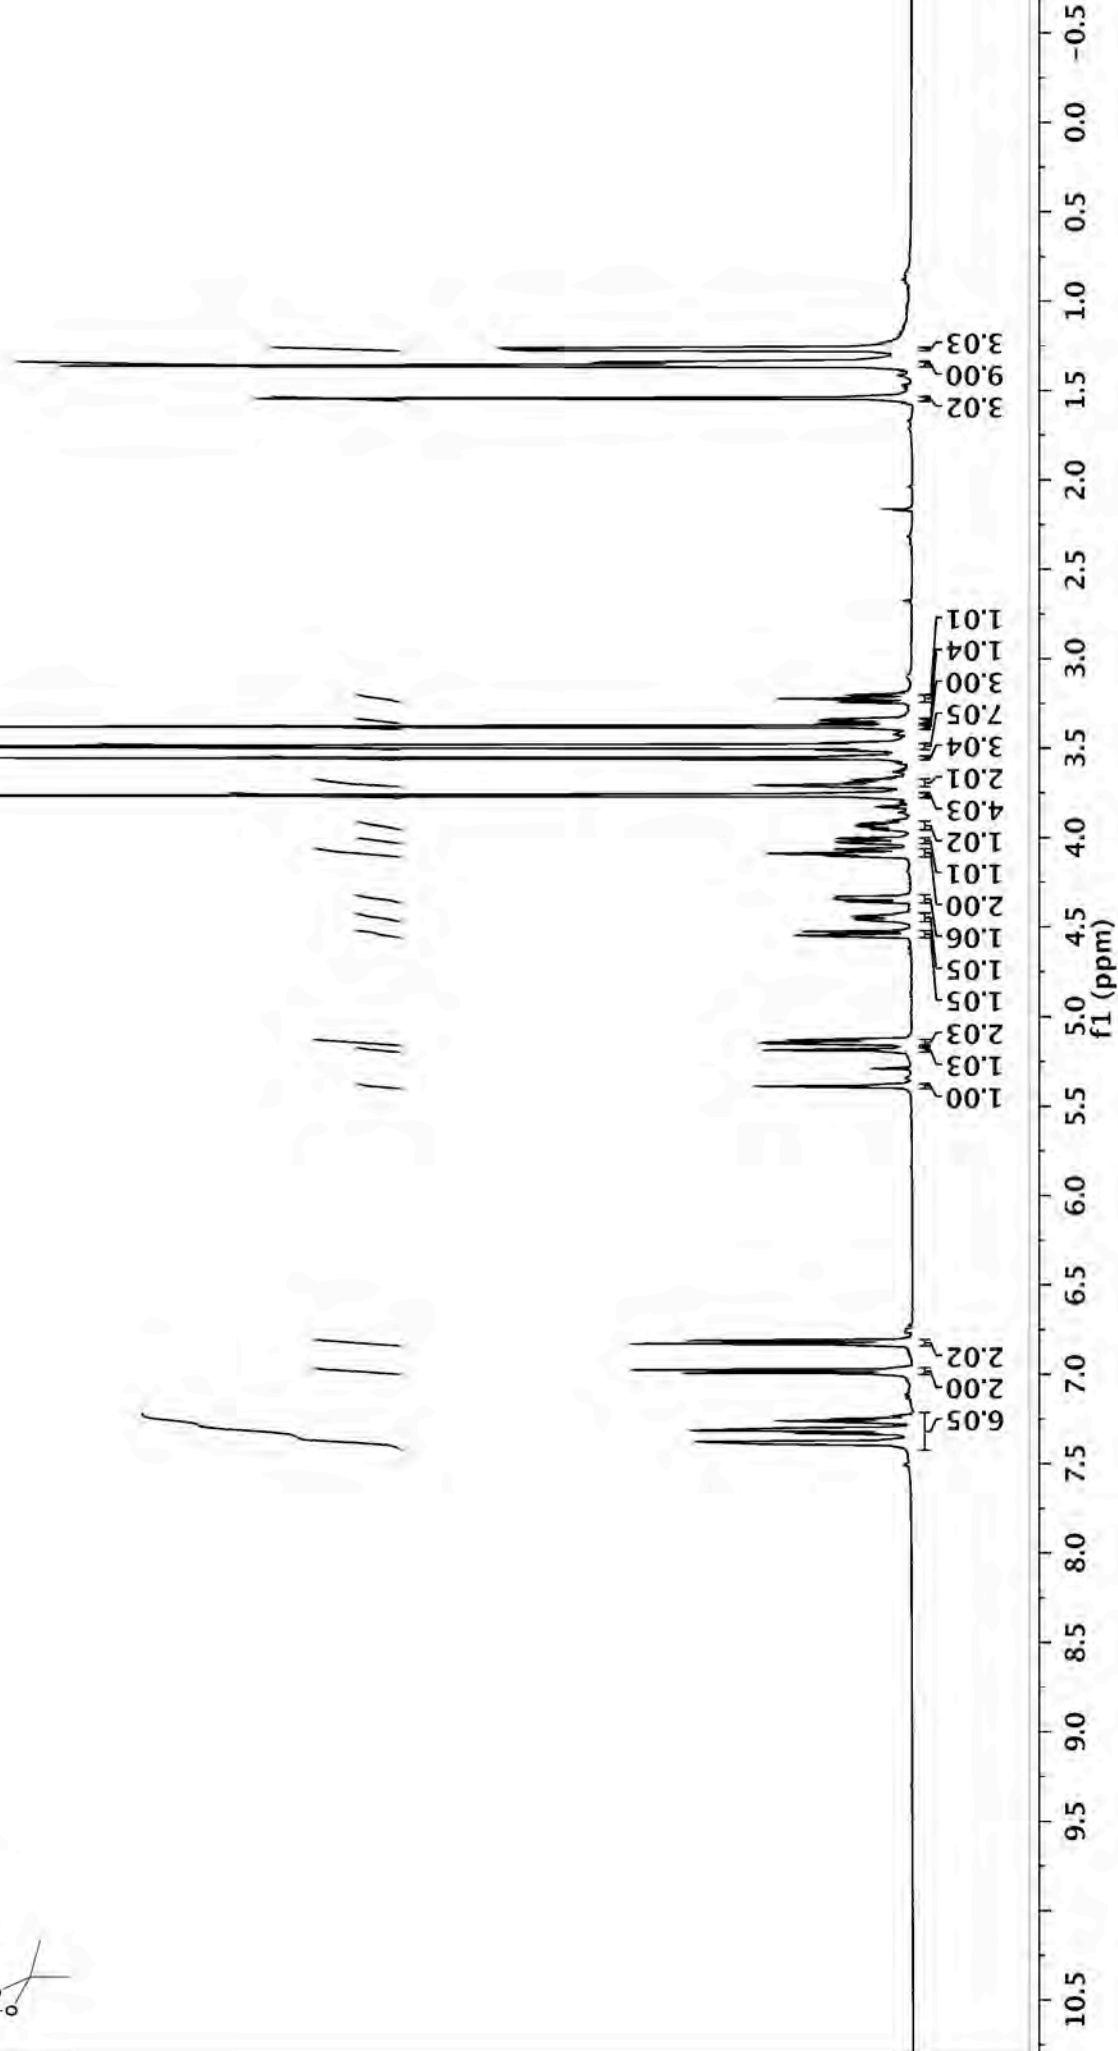

<sup>1</sup>H NMR of compound S28

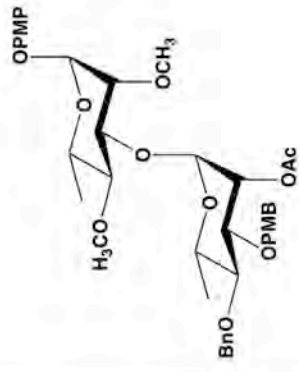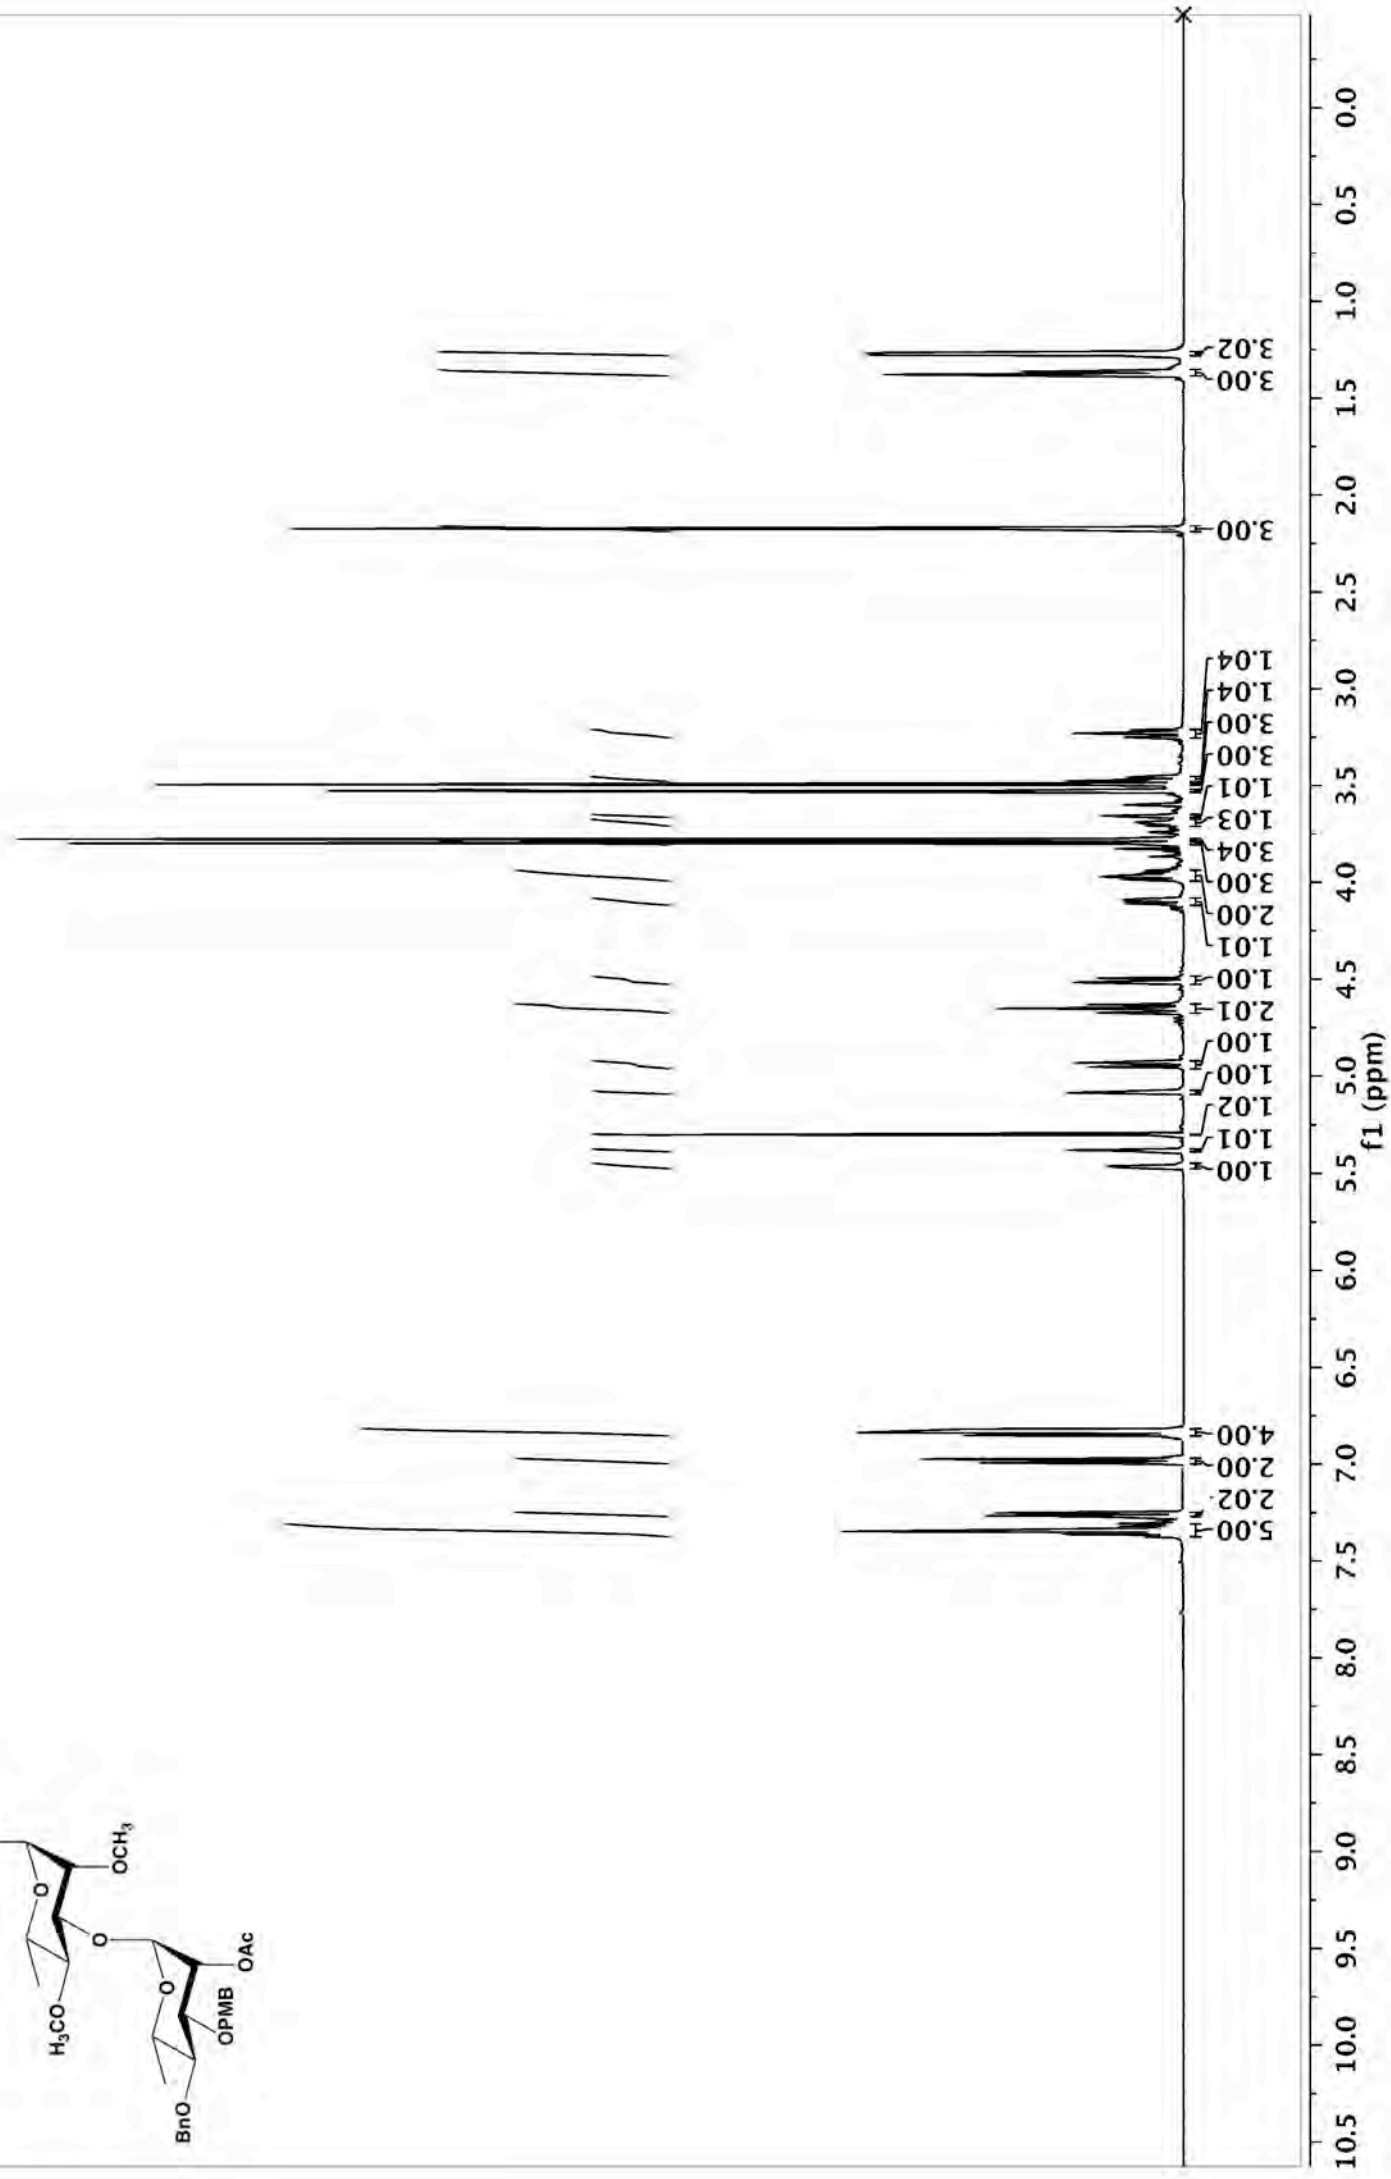

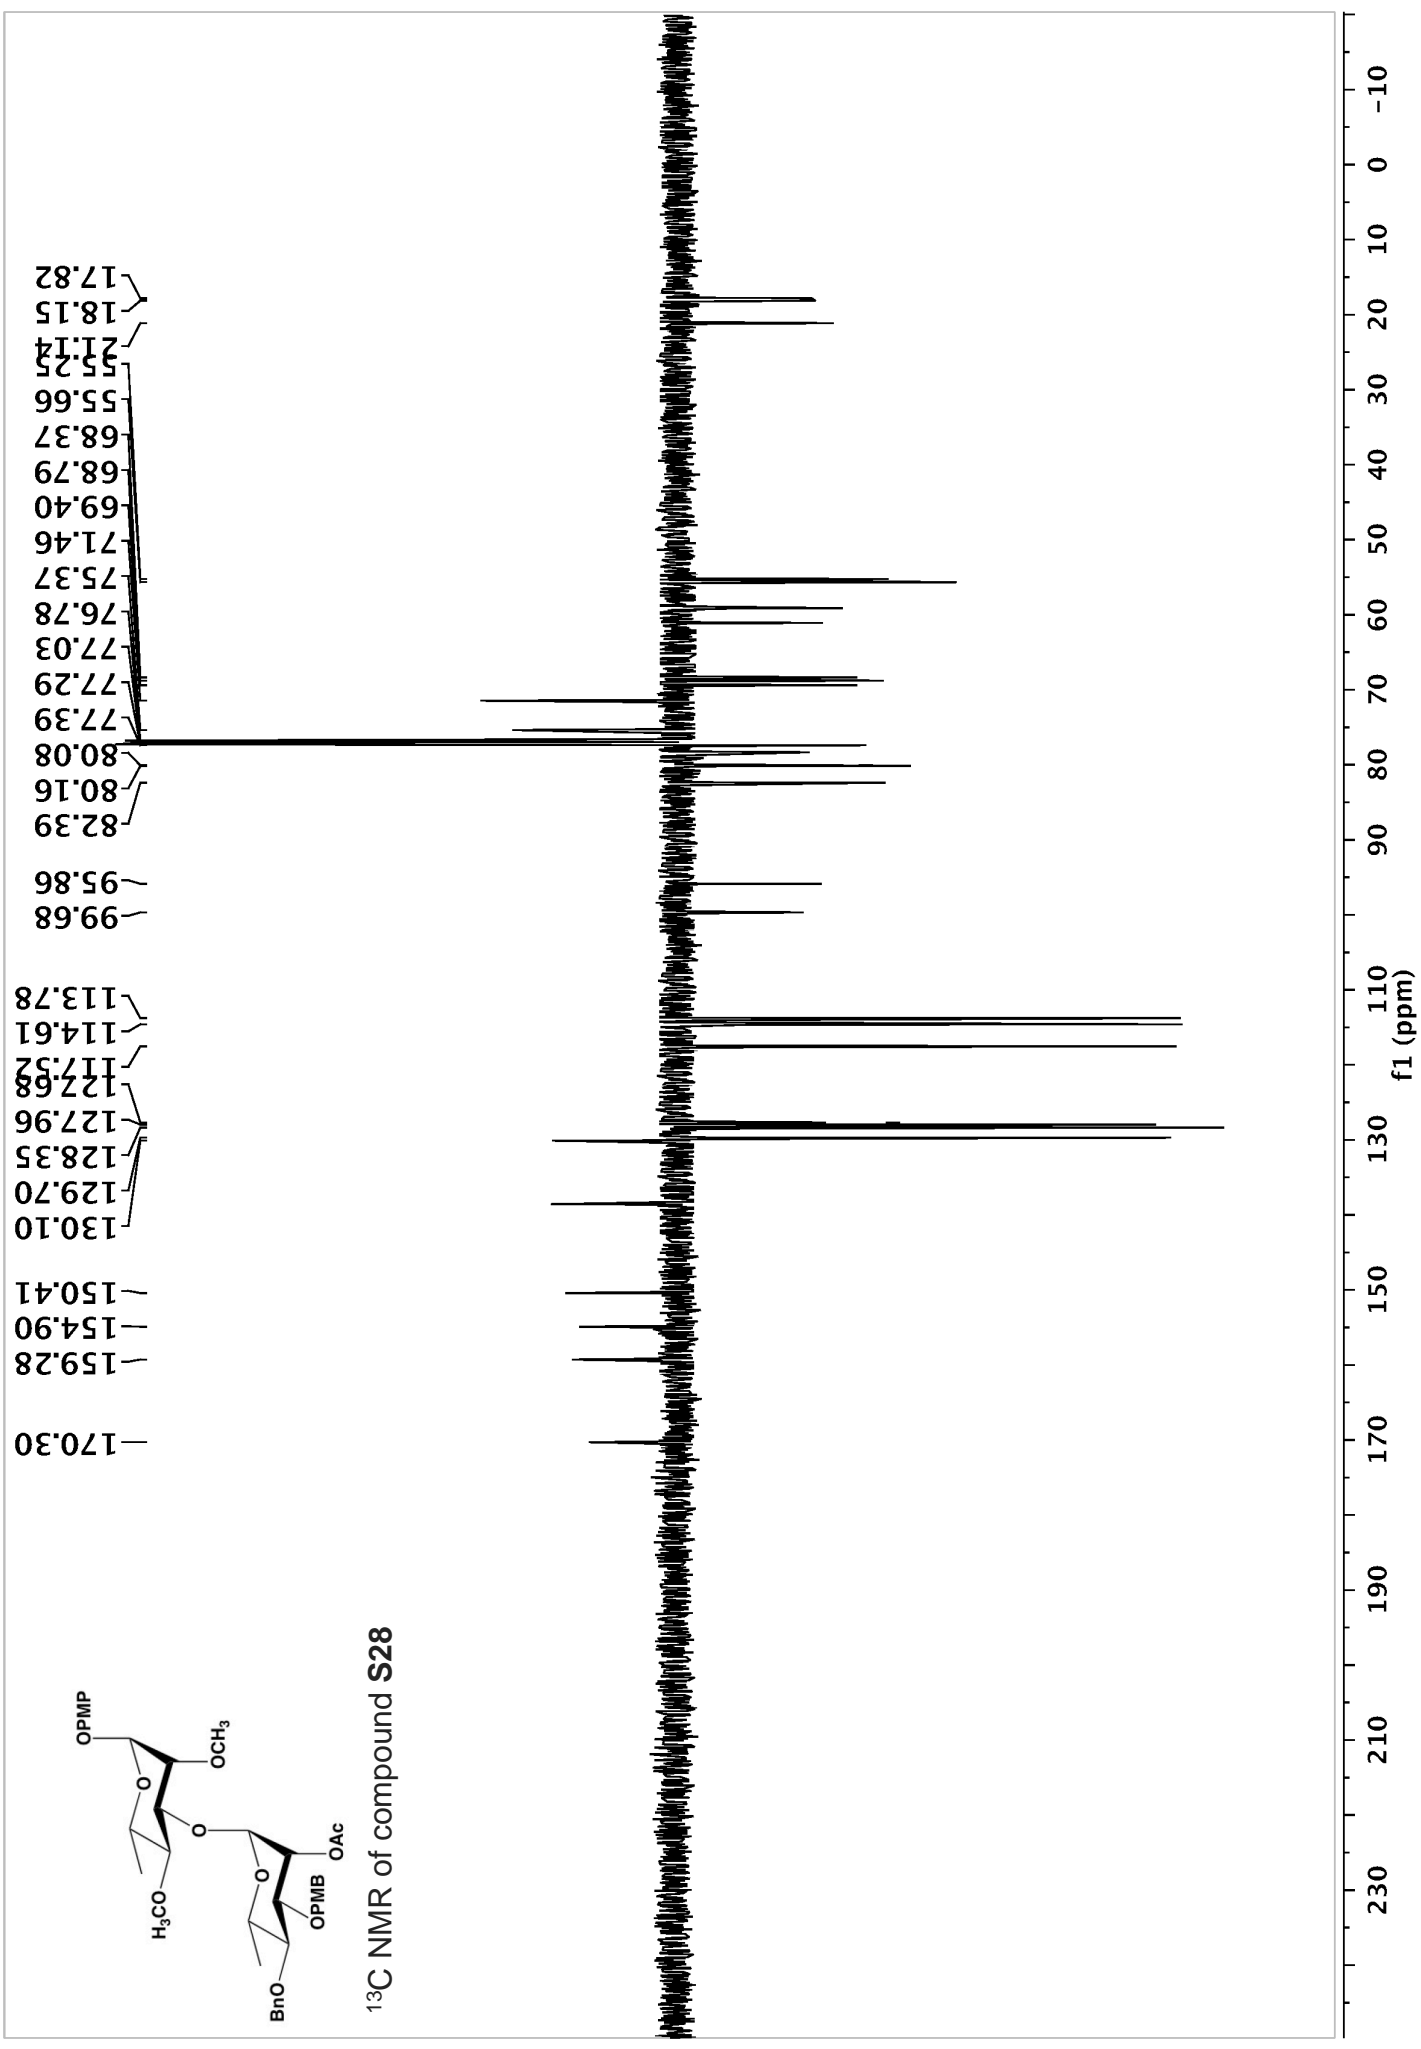

<sup>13</sup>C NMR of compound S29

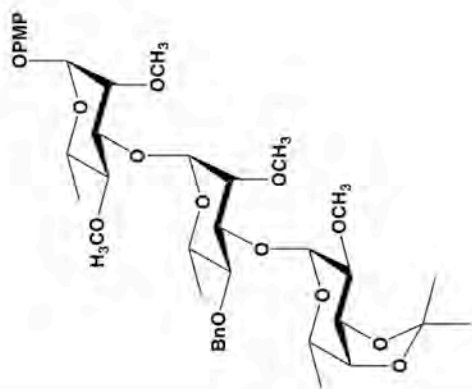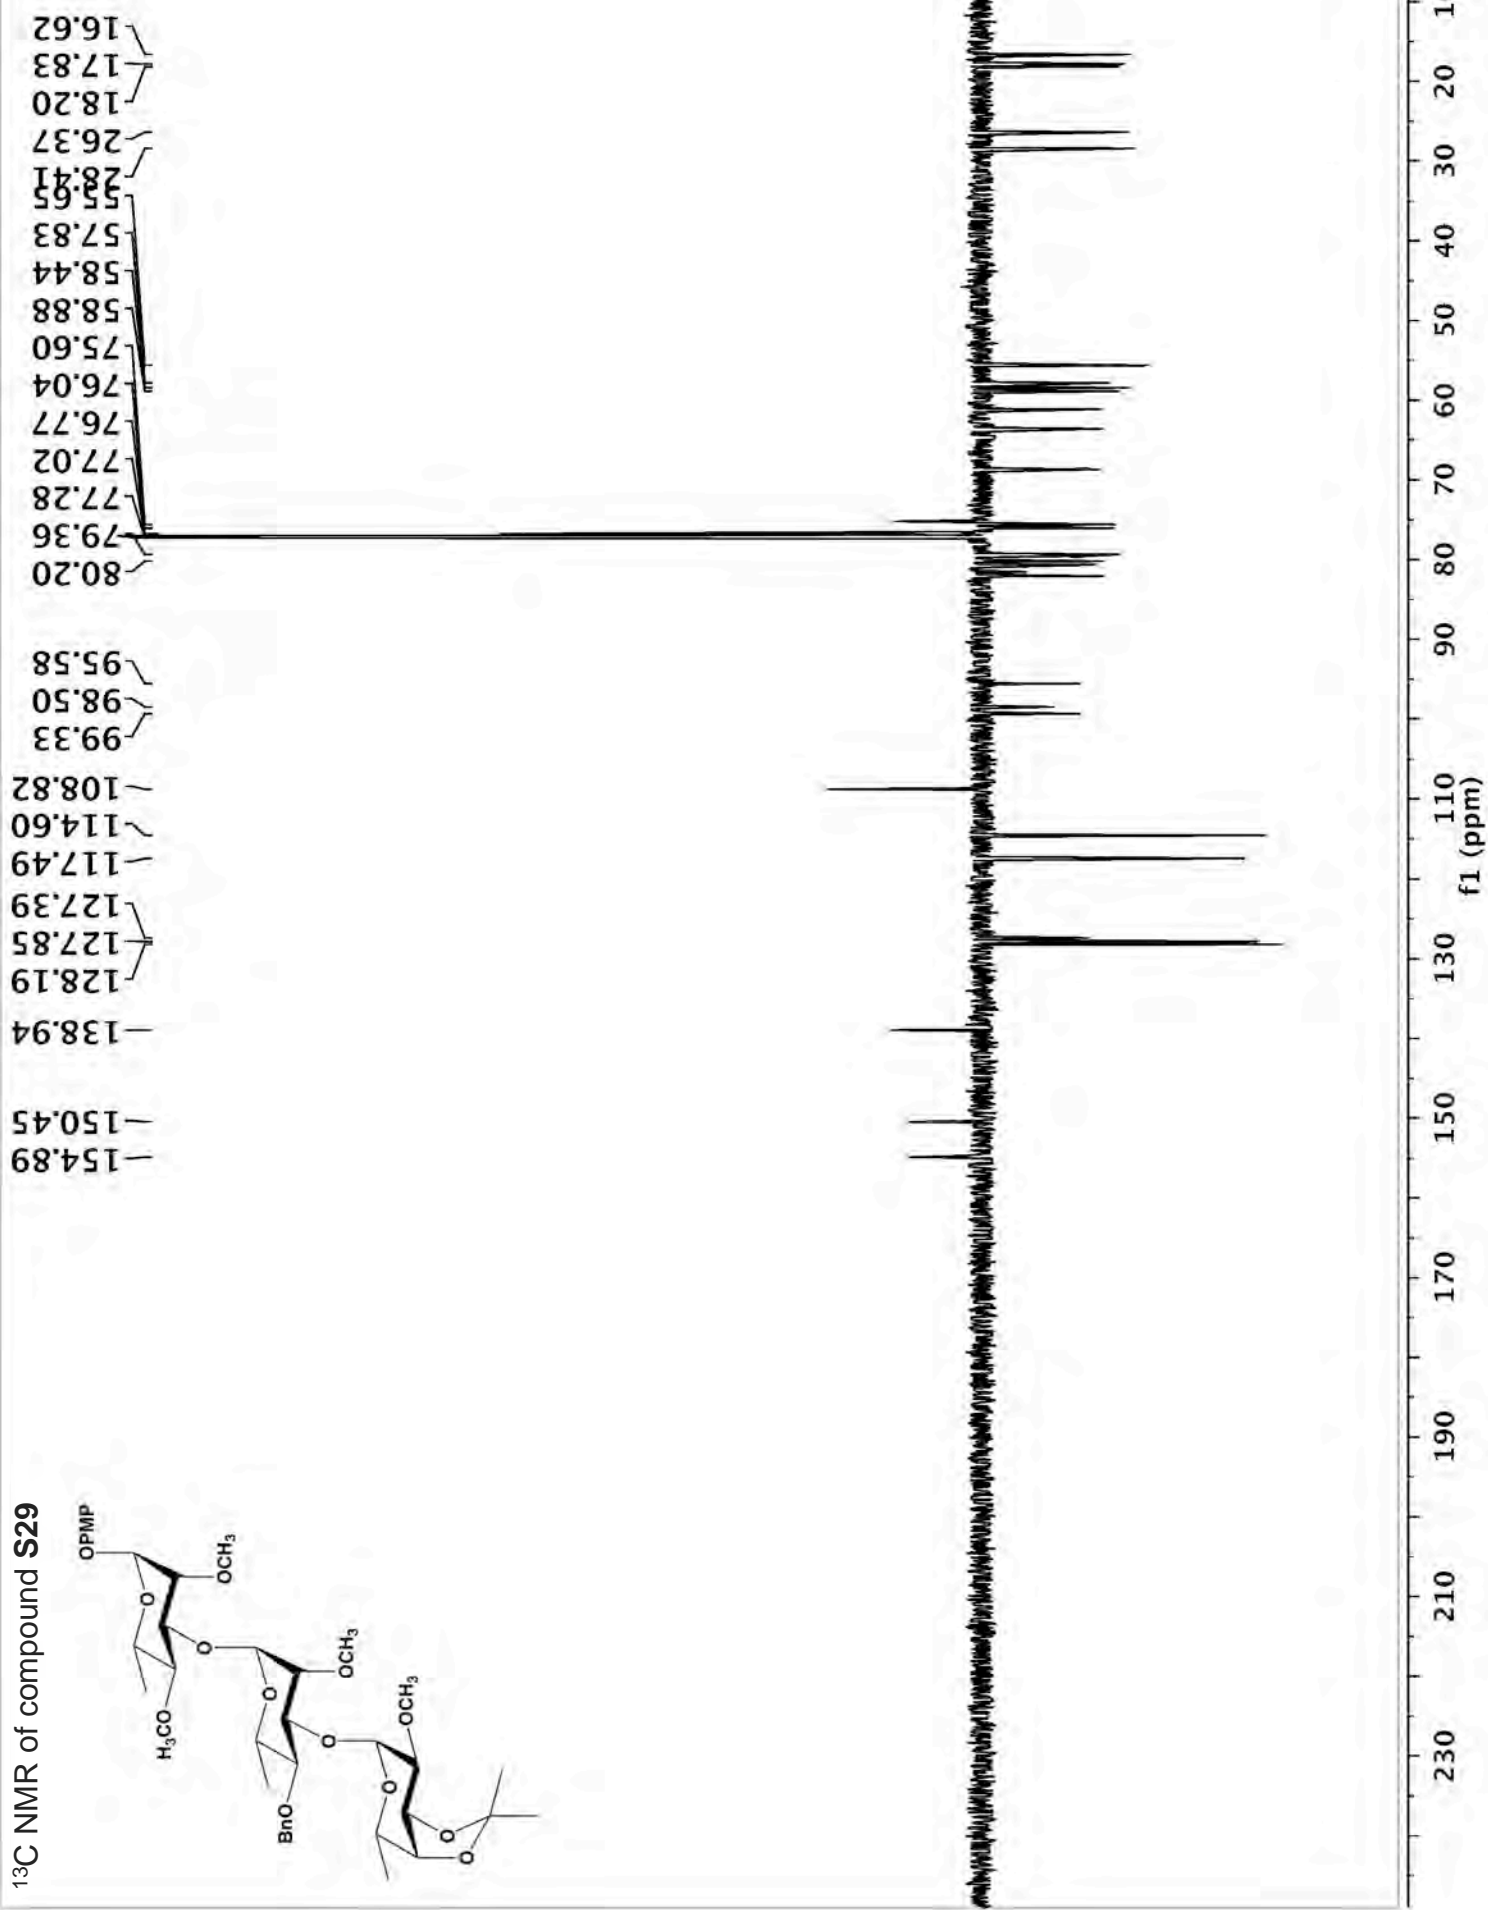



<sup>13</sup>C NMR of compound S30

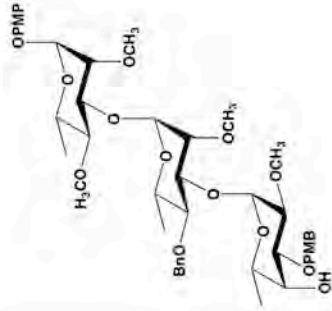

- 159.32
- 154.90
- 150.47
- 130.30
- 129.34
- 128.22
- 127.76
- 127.50
- 122.39
- 114.61
- 113.89
- 99.77
- 98.51
- 95.61
- 80.72
- 80.20
- 77.68
- 77.30
- 77.05
- 76.79
- 71.96
- 68.74
- 68.62
- 65.73
- 59.03
- 57.84
- 55.66
- 55.24
- 18.23
- 17.84
- 16.43

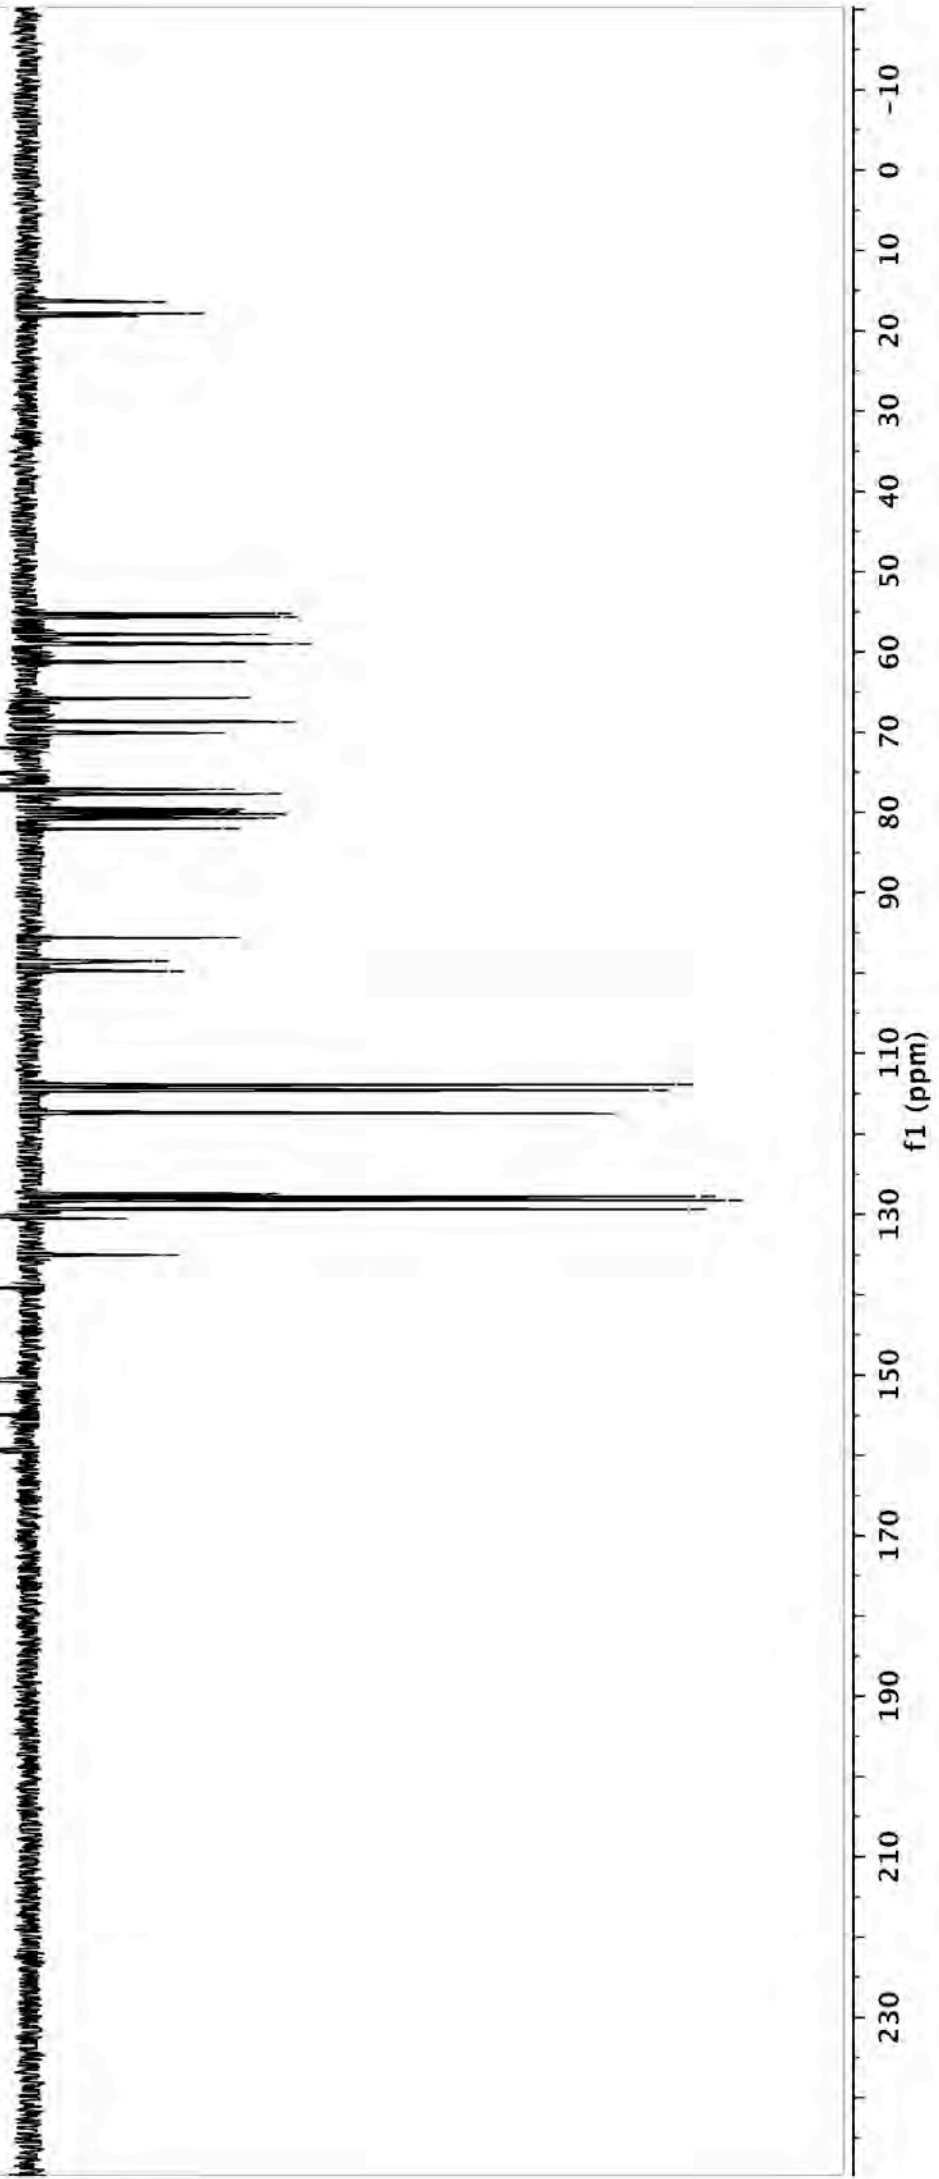

<sup>1</sup>H NMR of compound S30

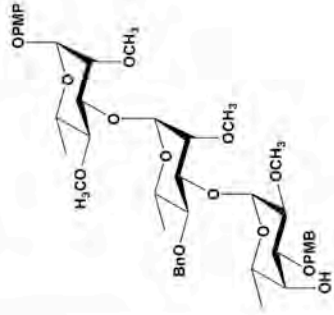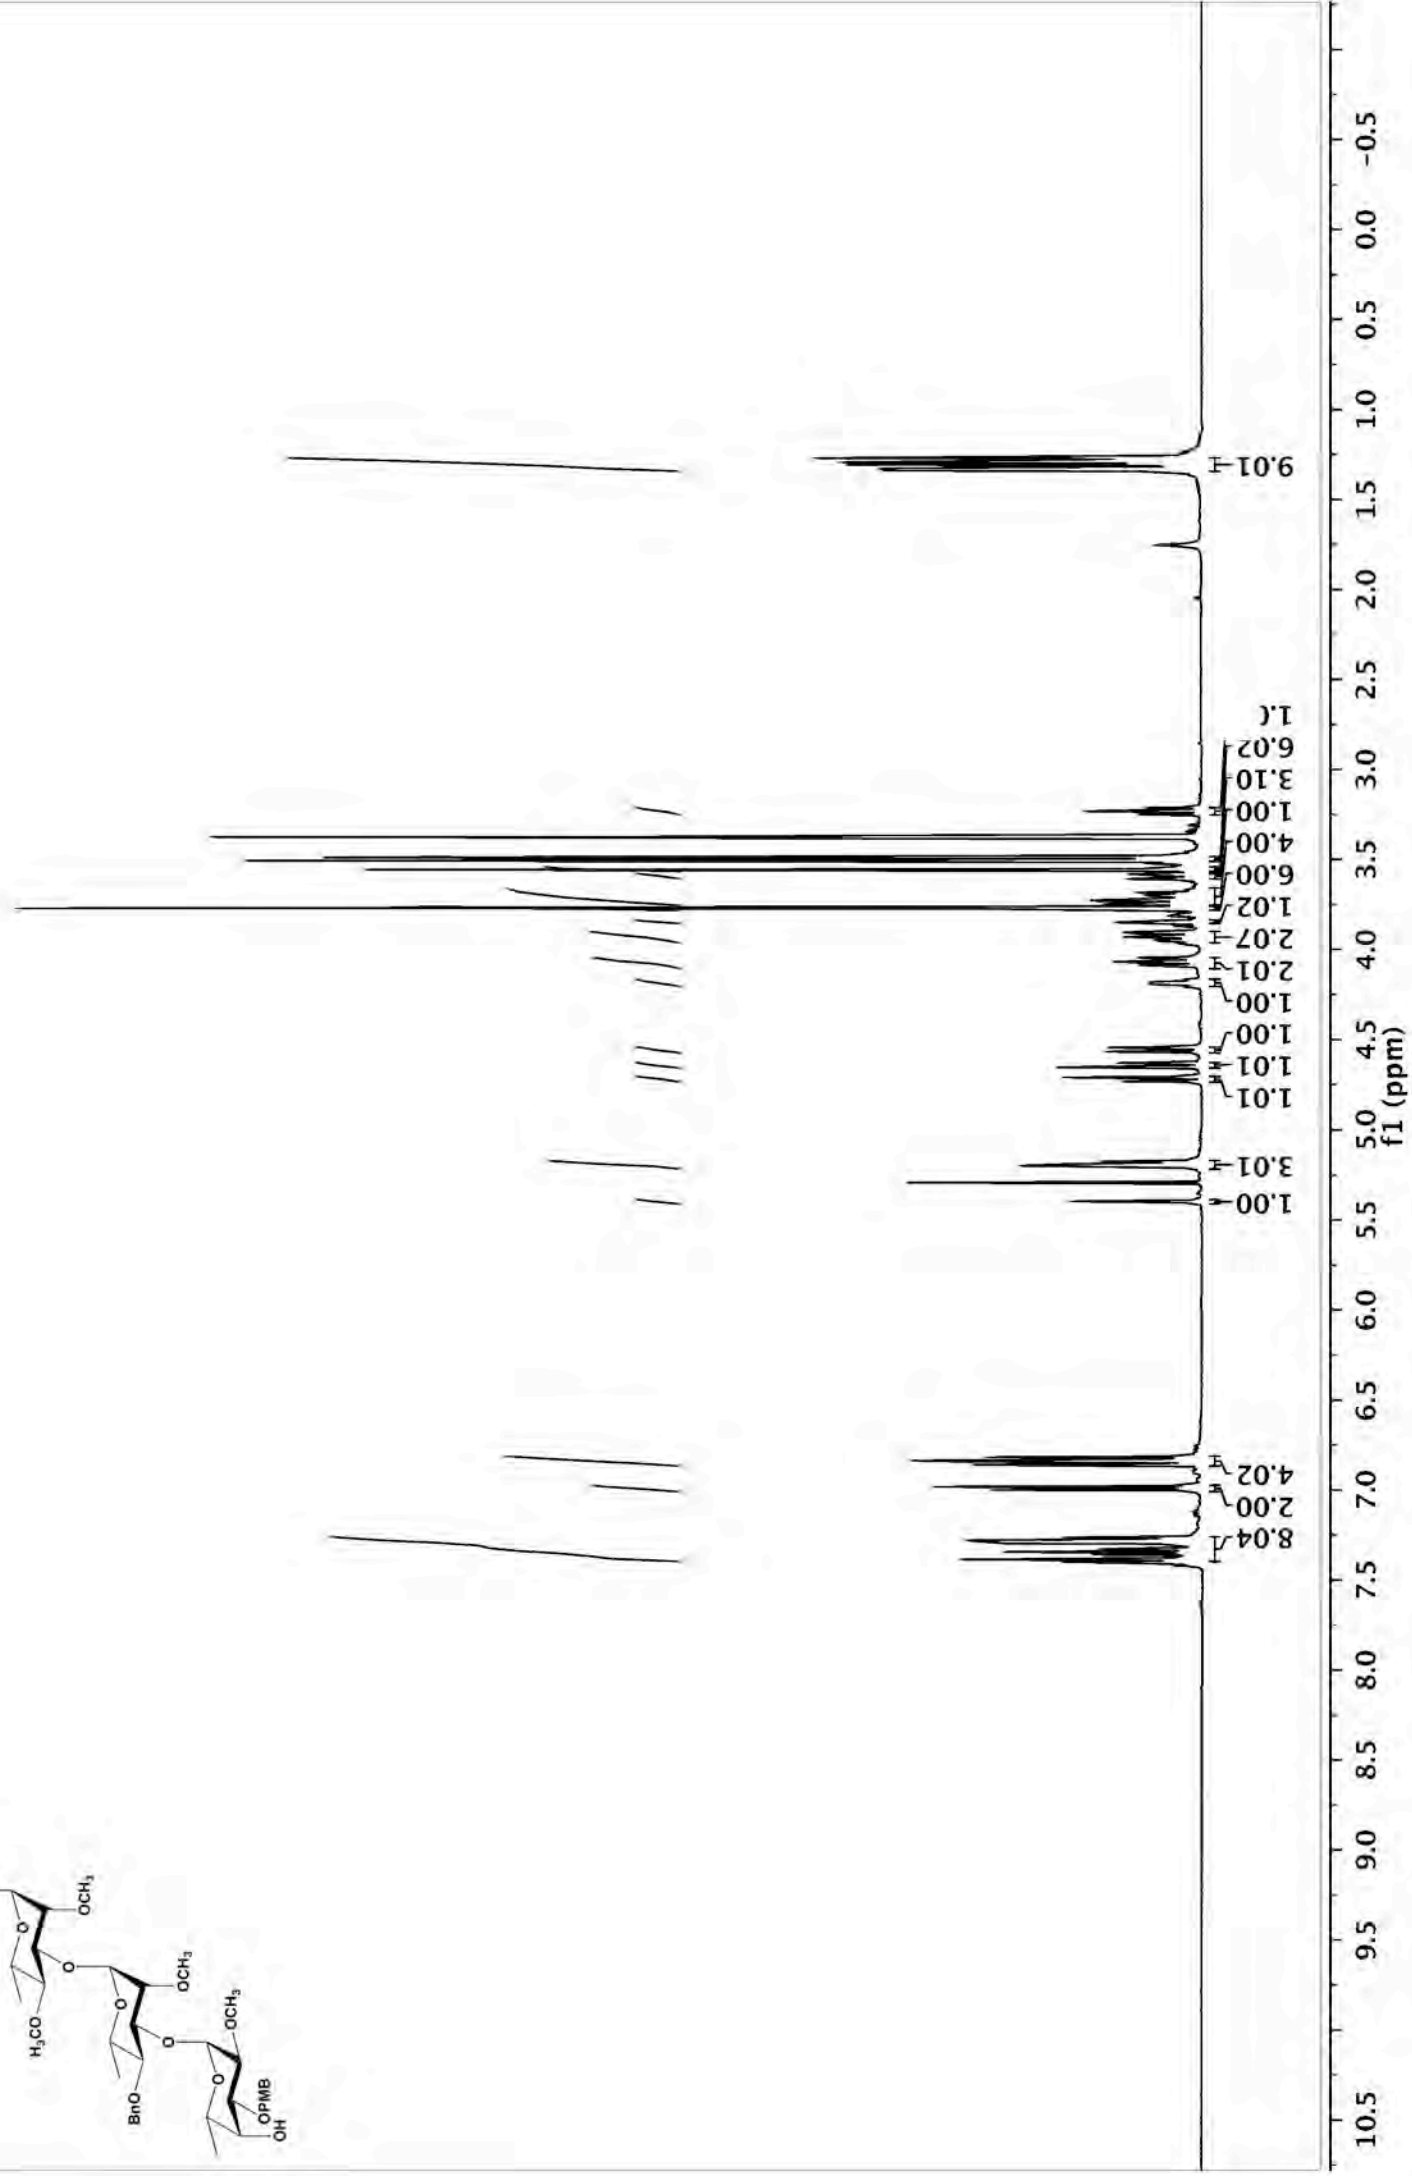

<sup>1</sup>HNMR of compound S32

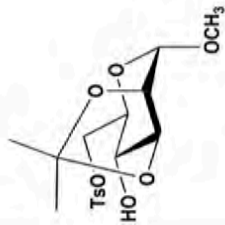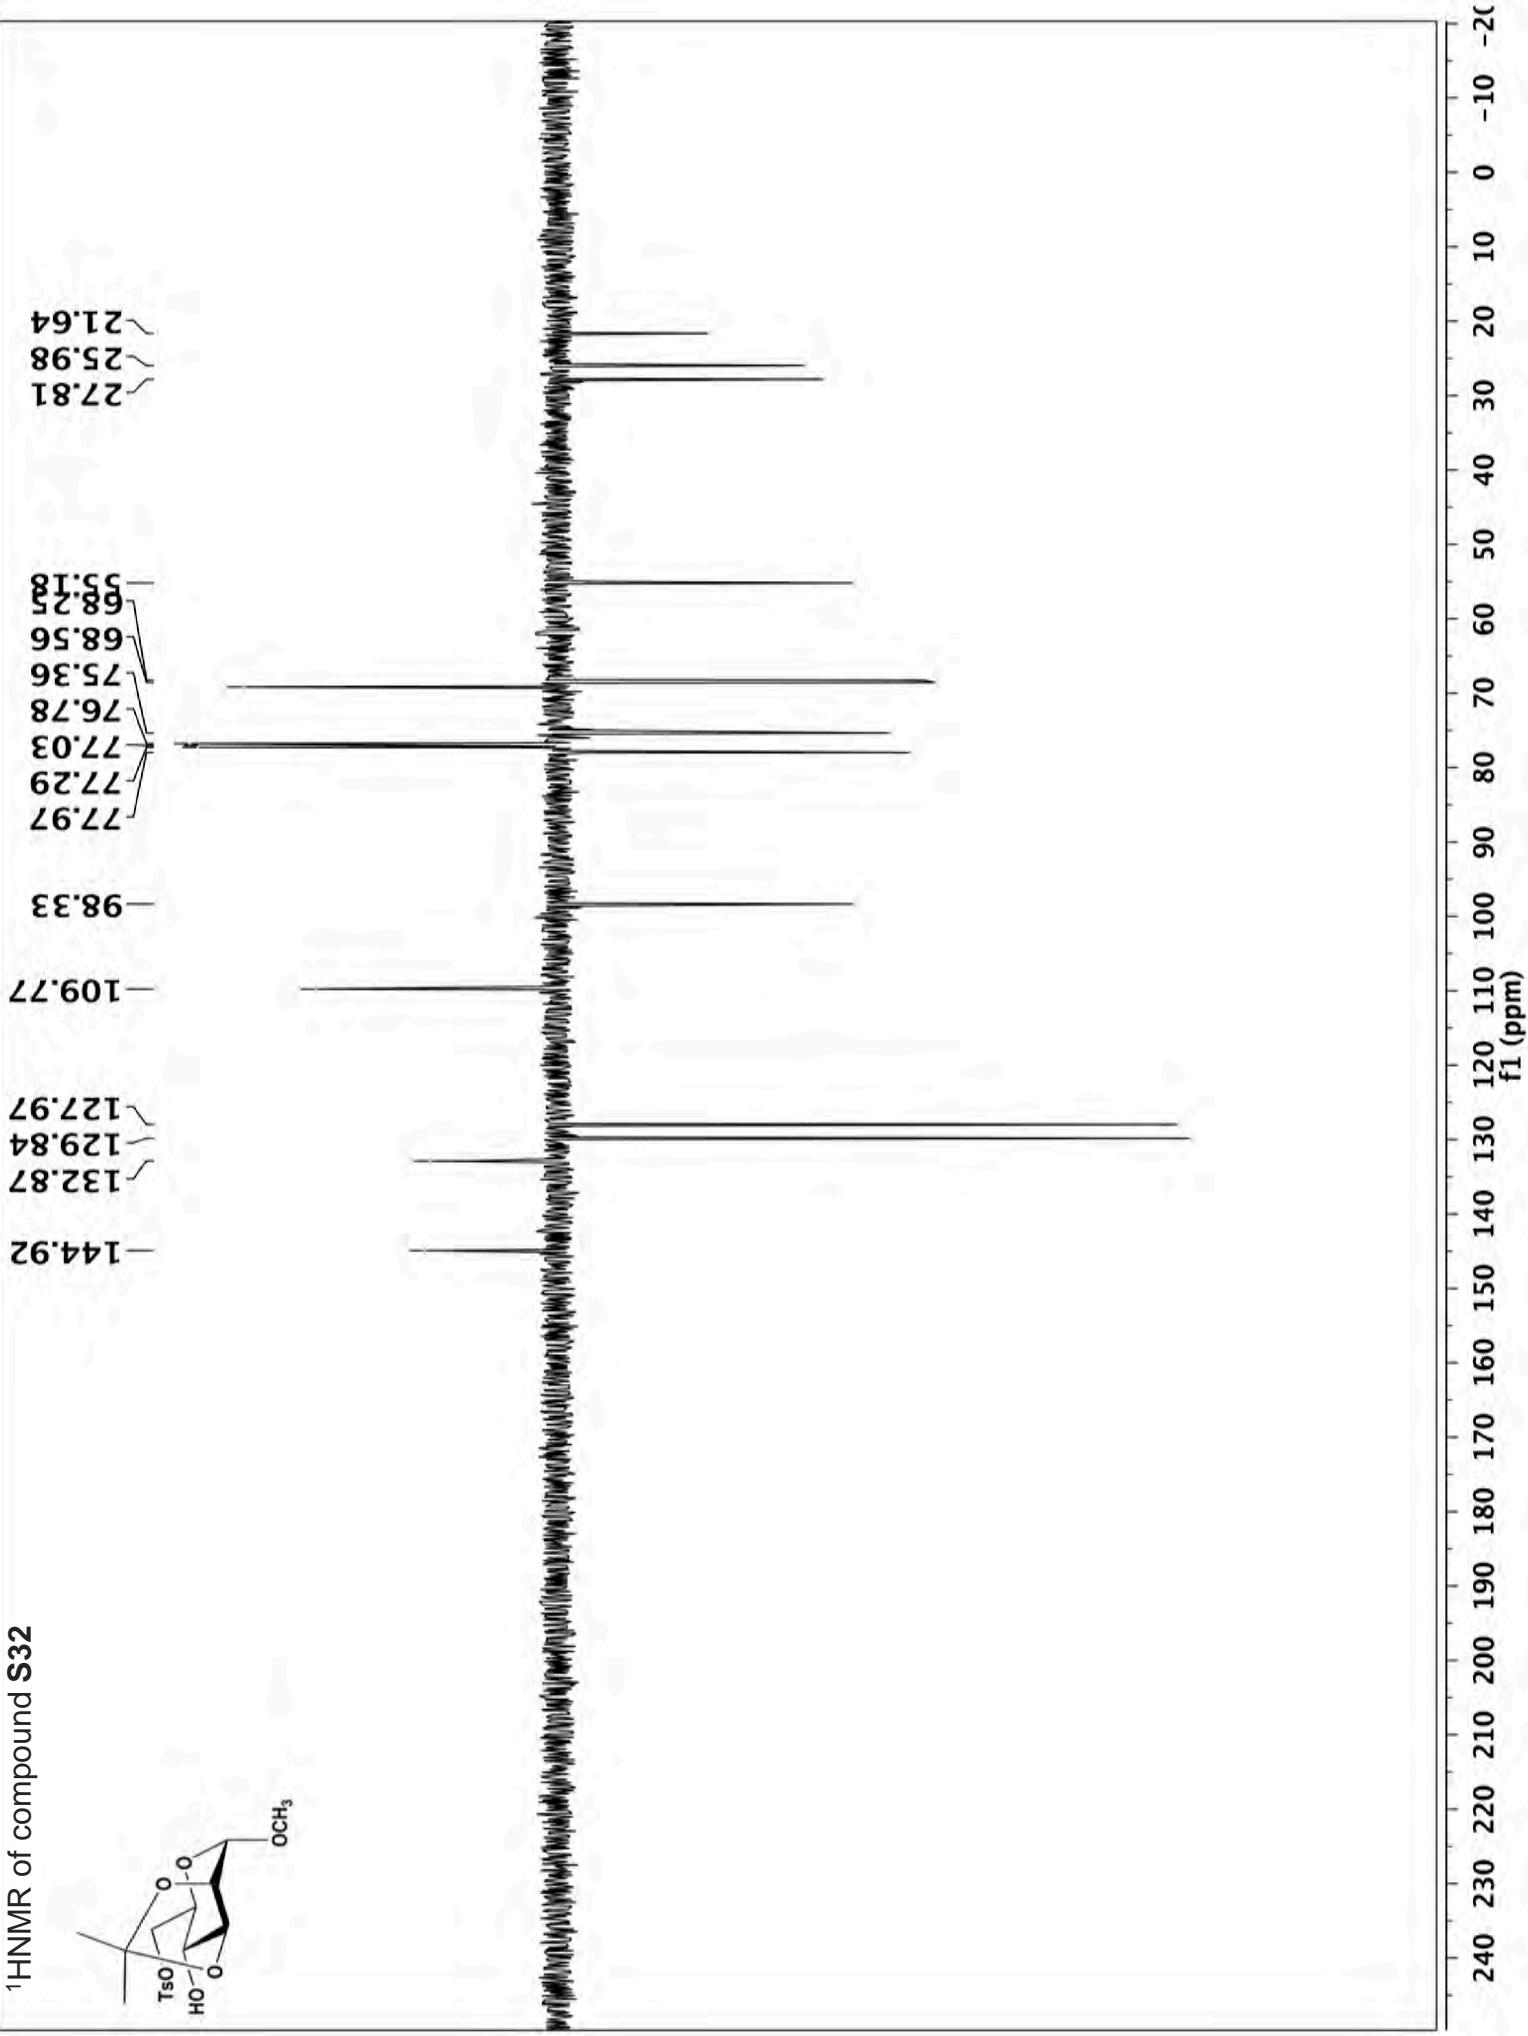



<sup>1</sup>H NMR of compound S32

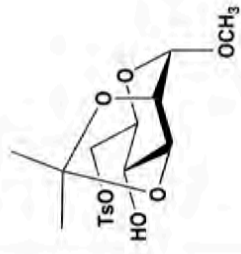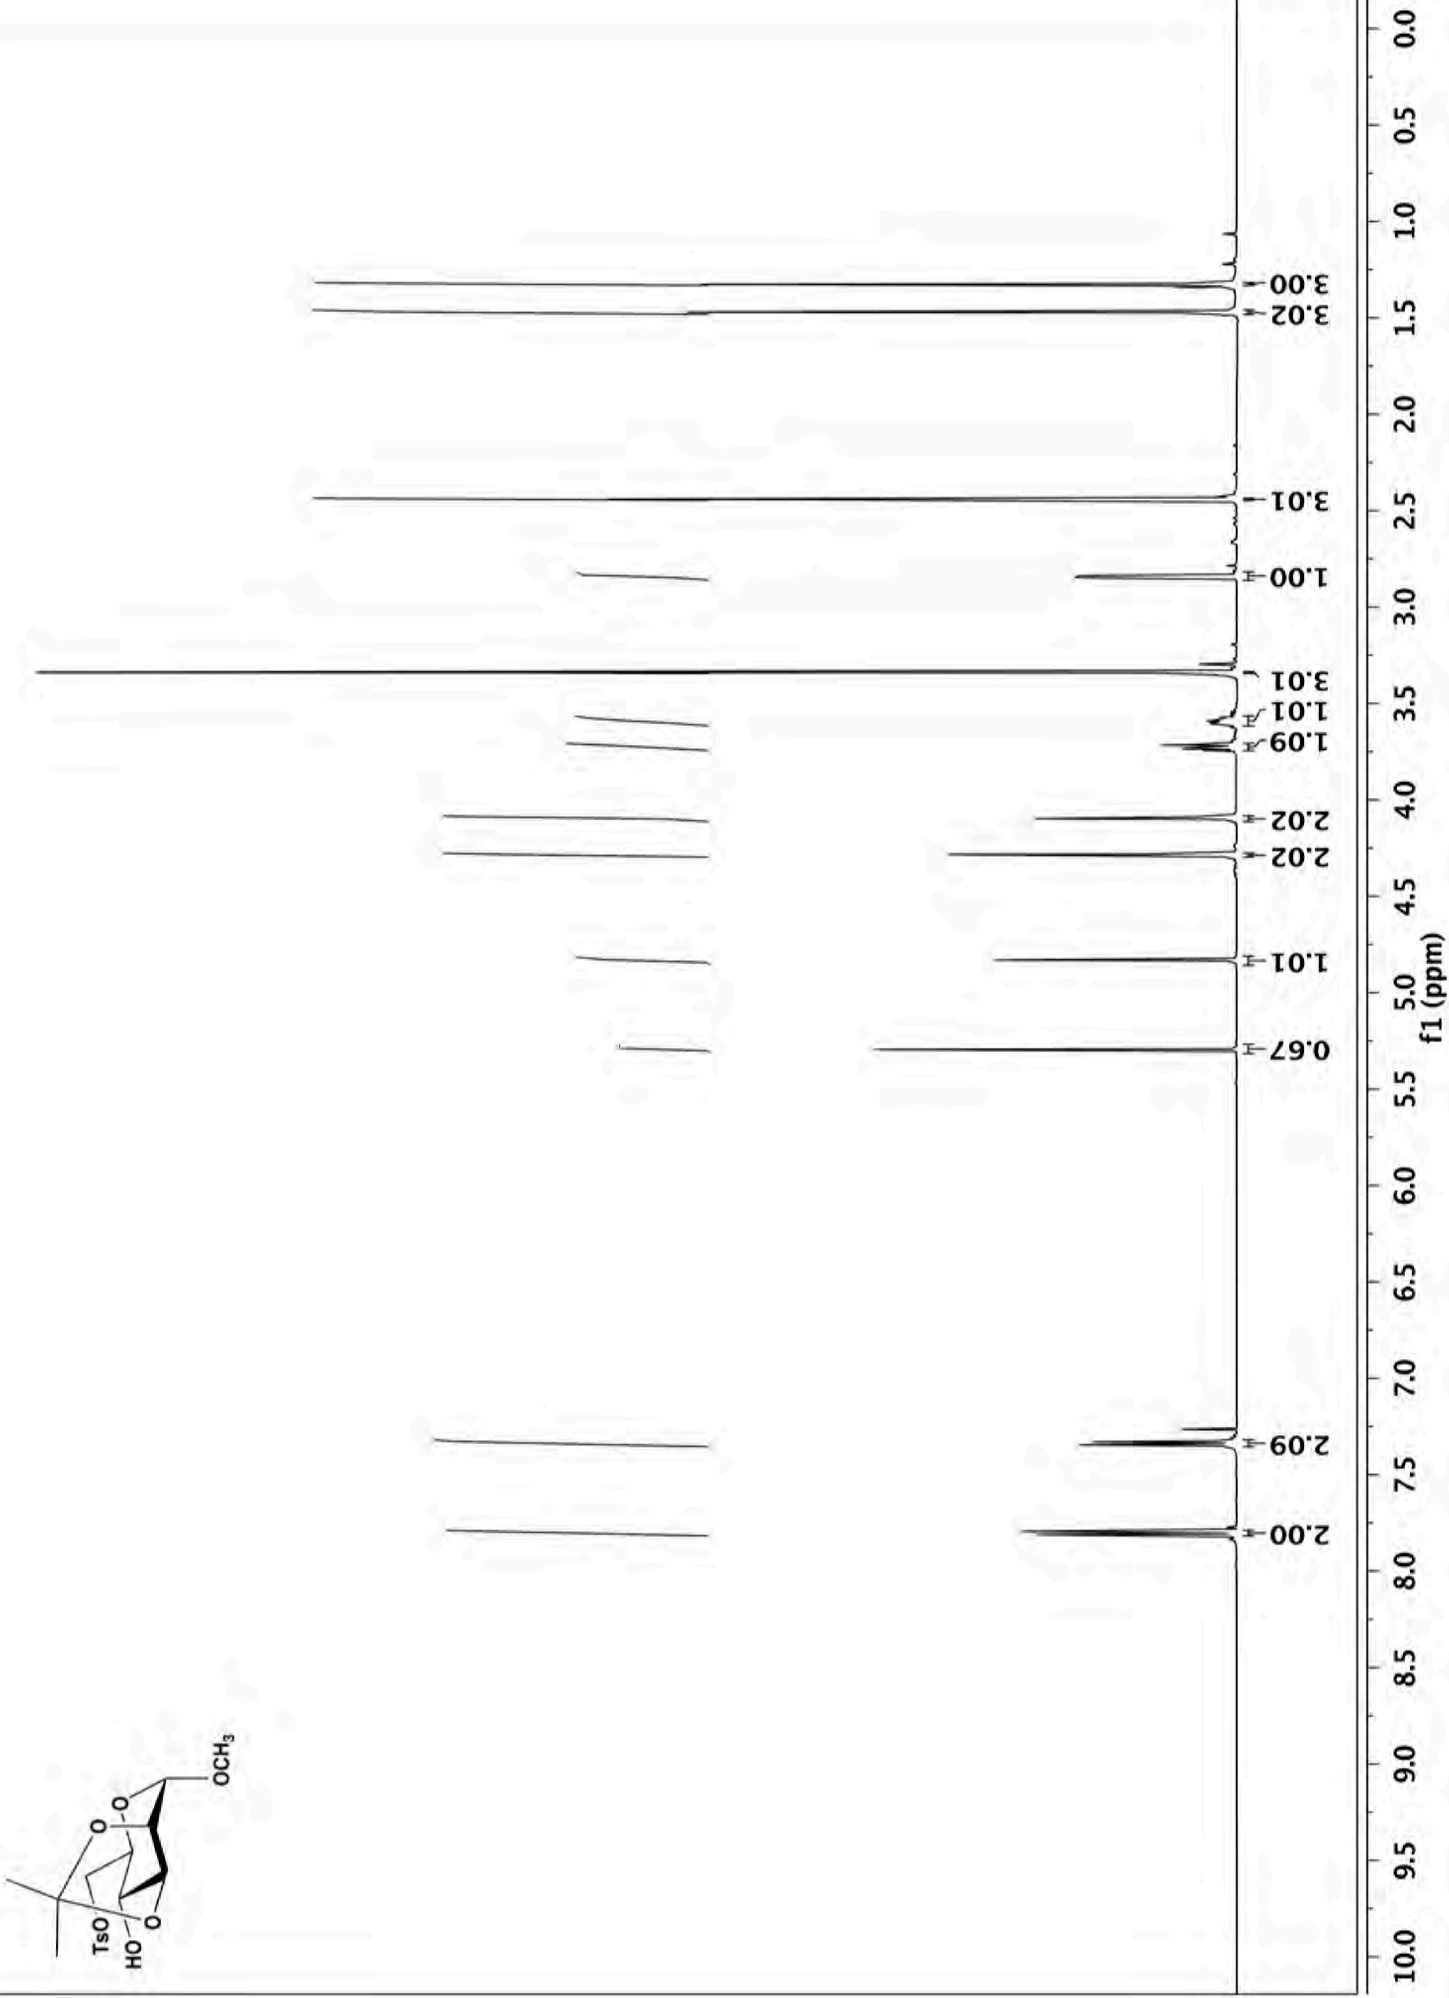

<sup>13</sup>C NMR of compound S33

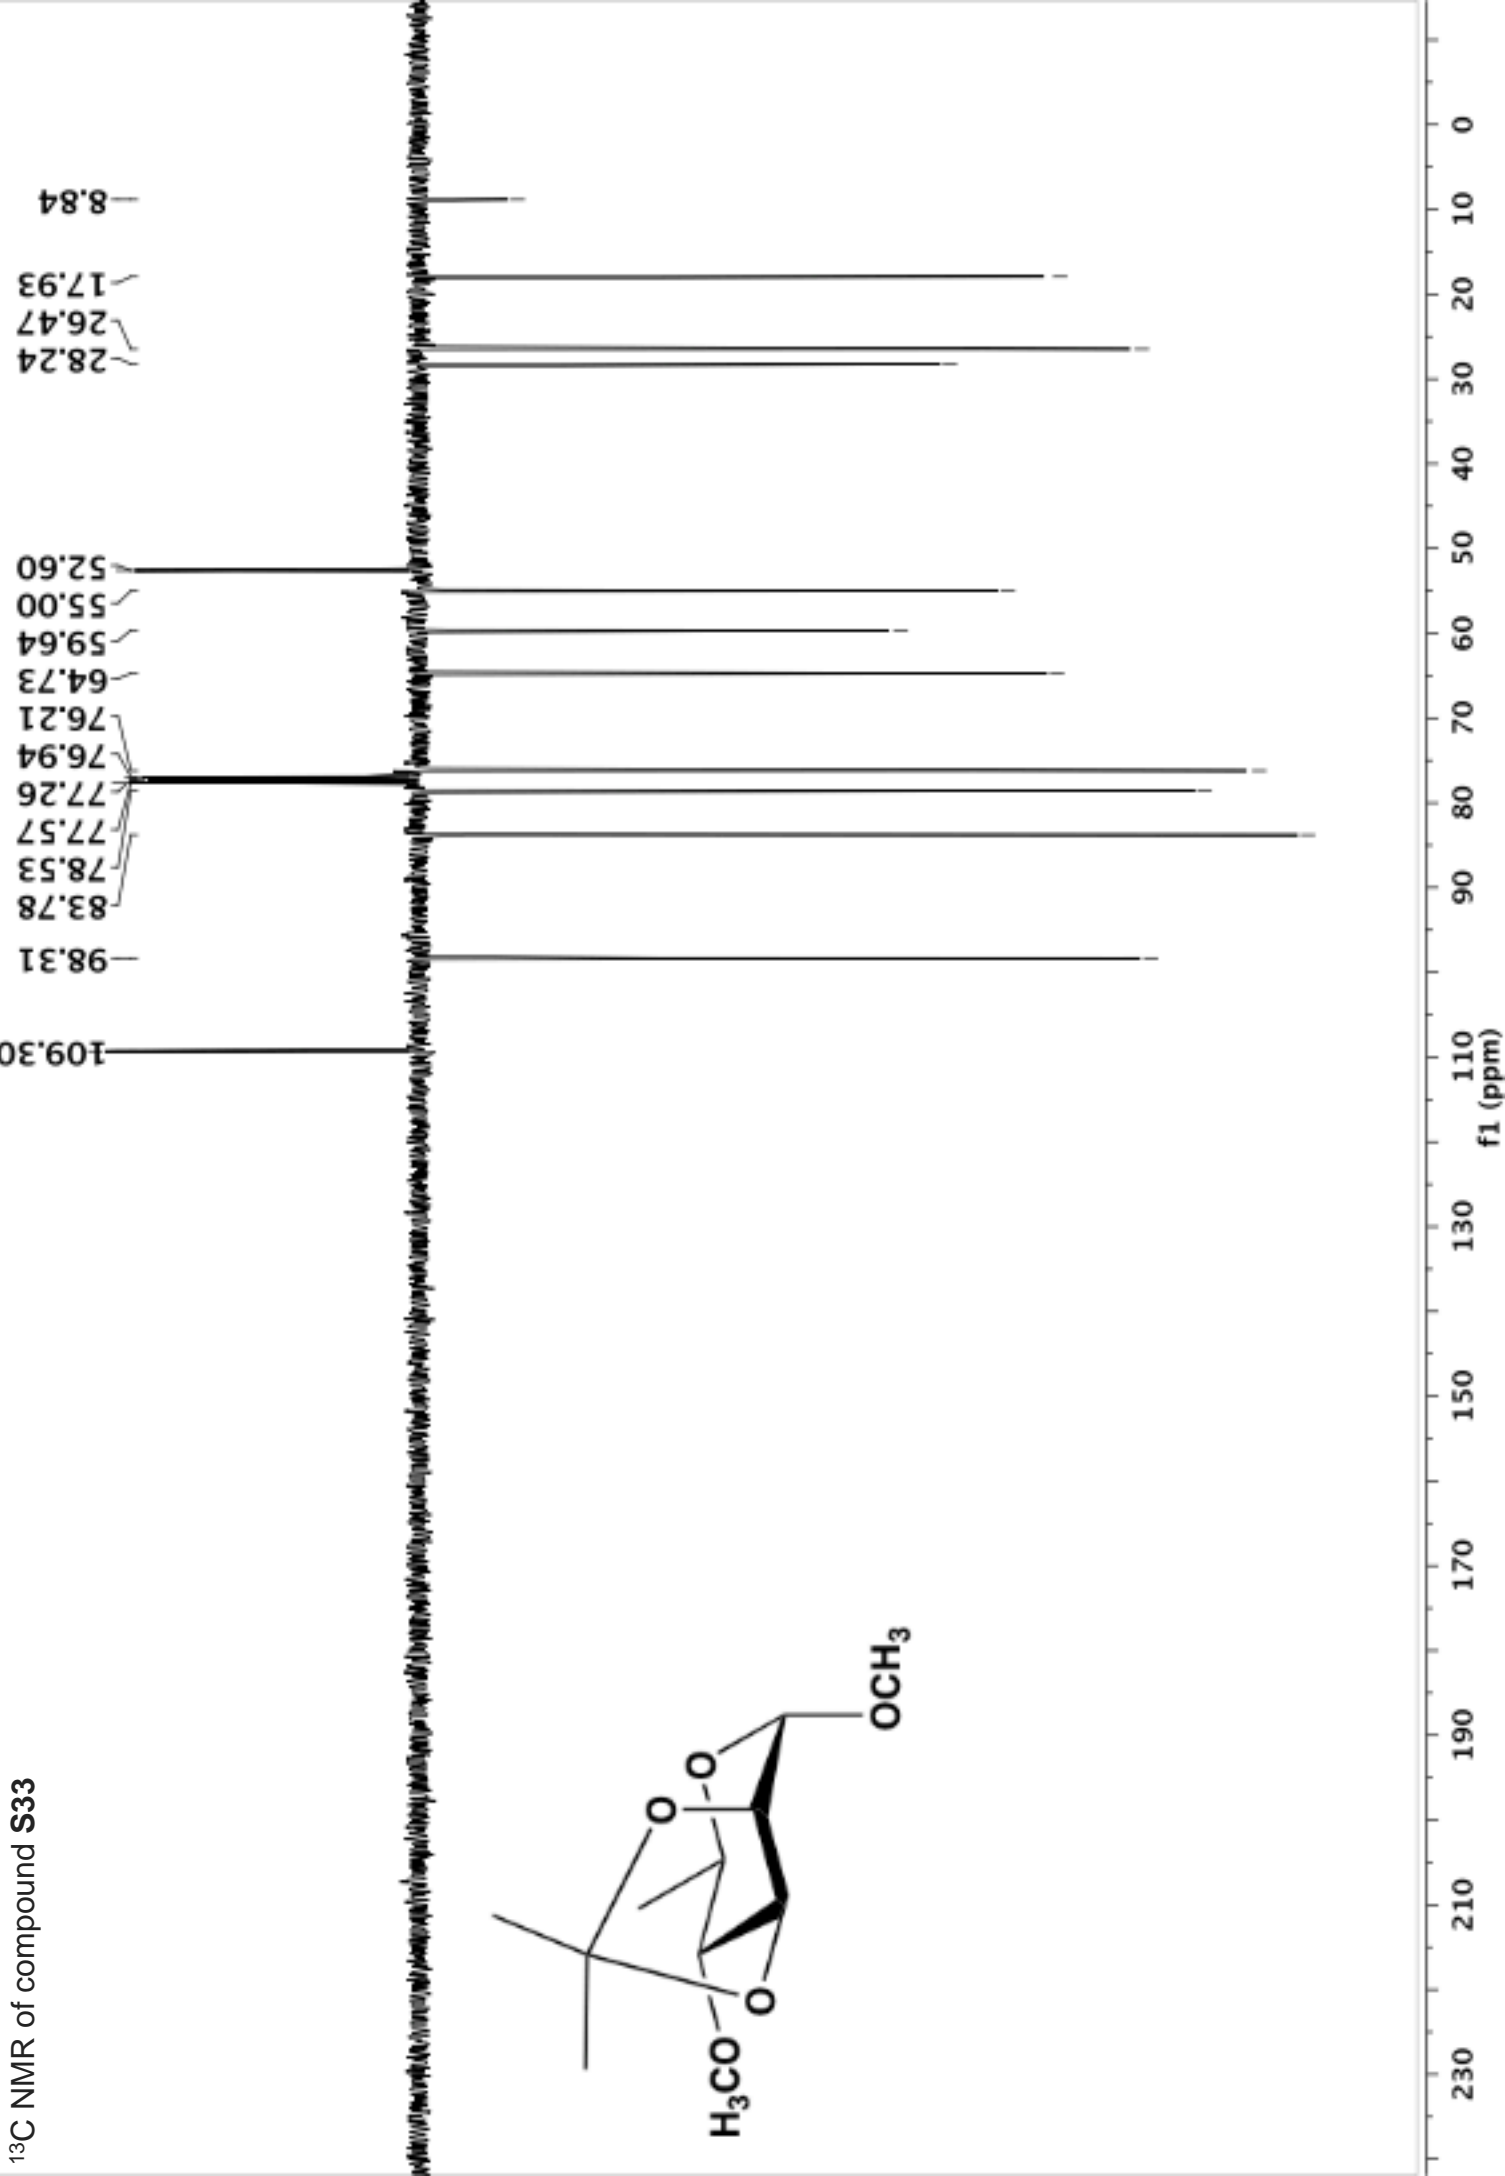

<sup>1</sup>H NMR of compound S33

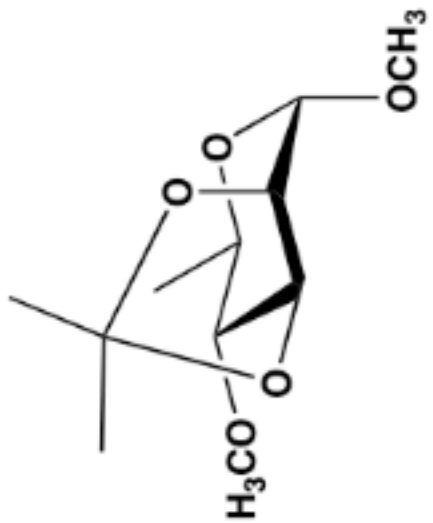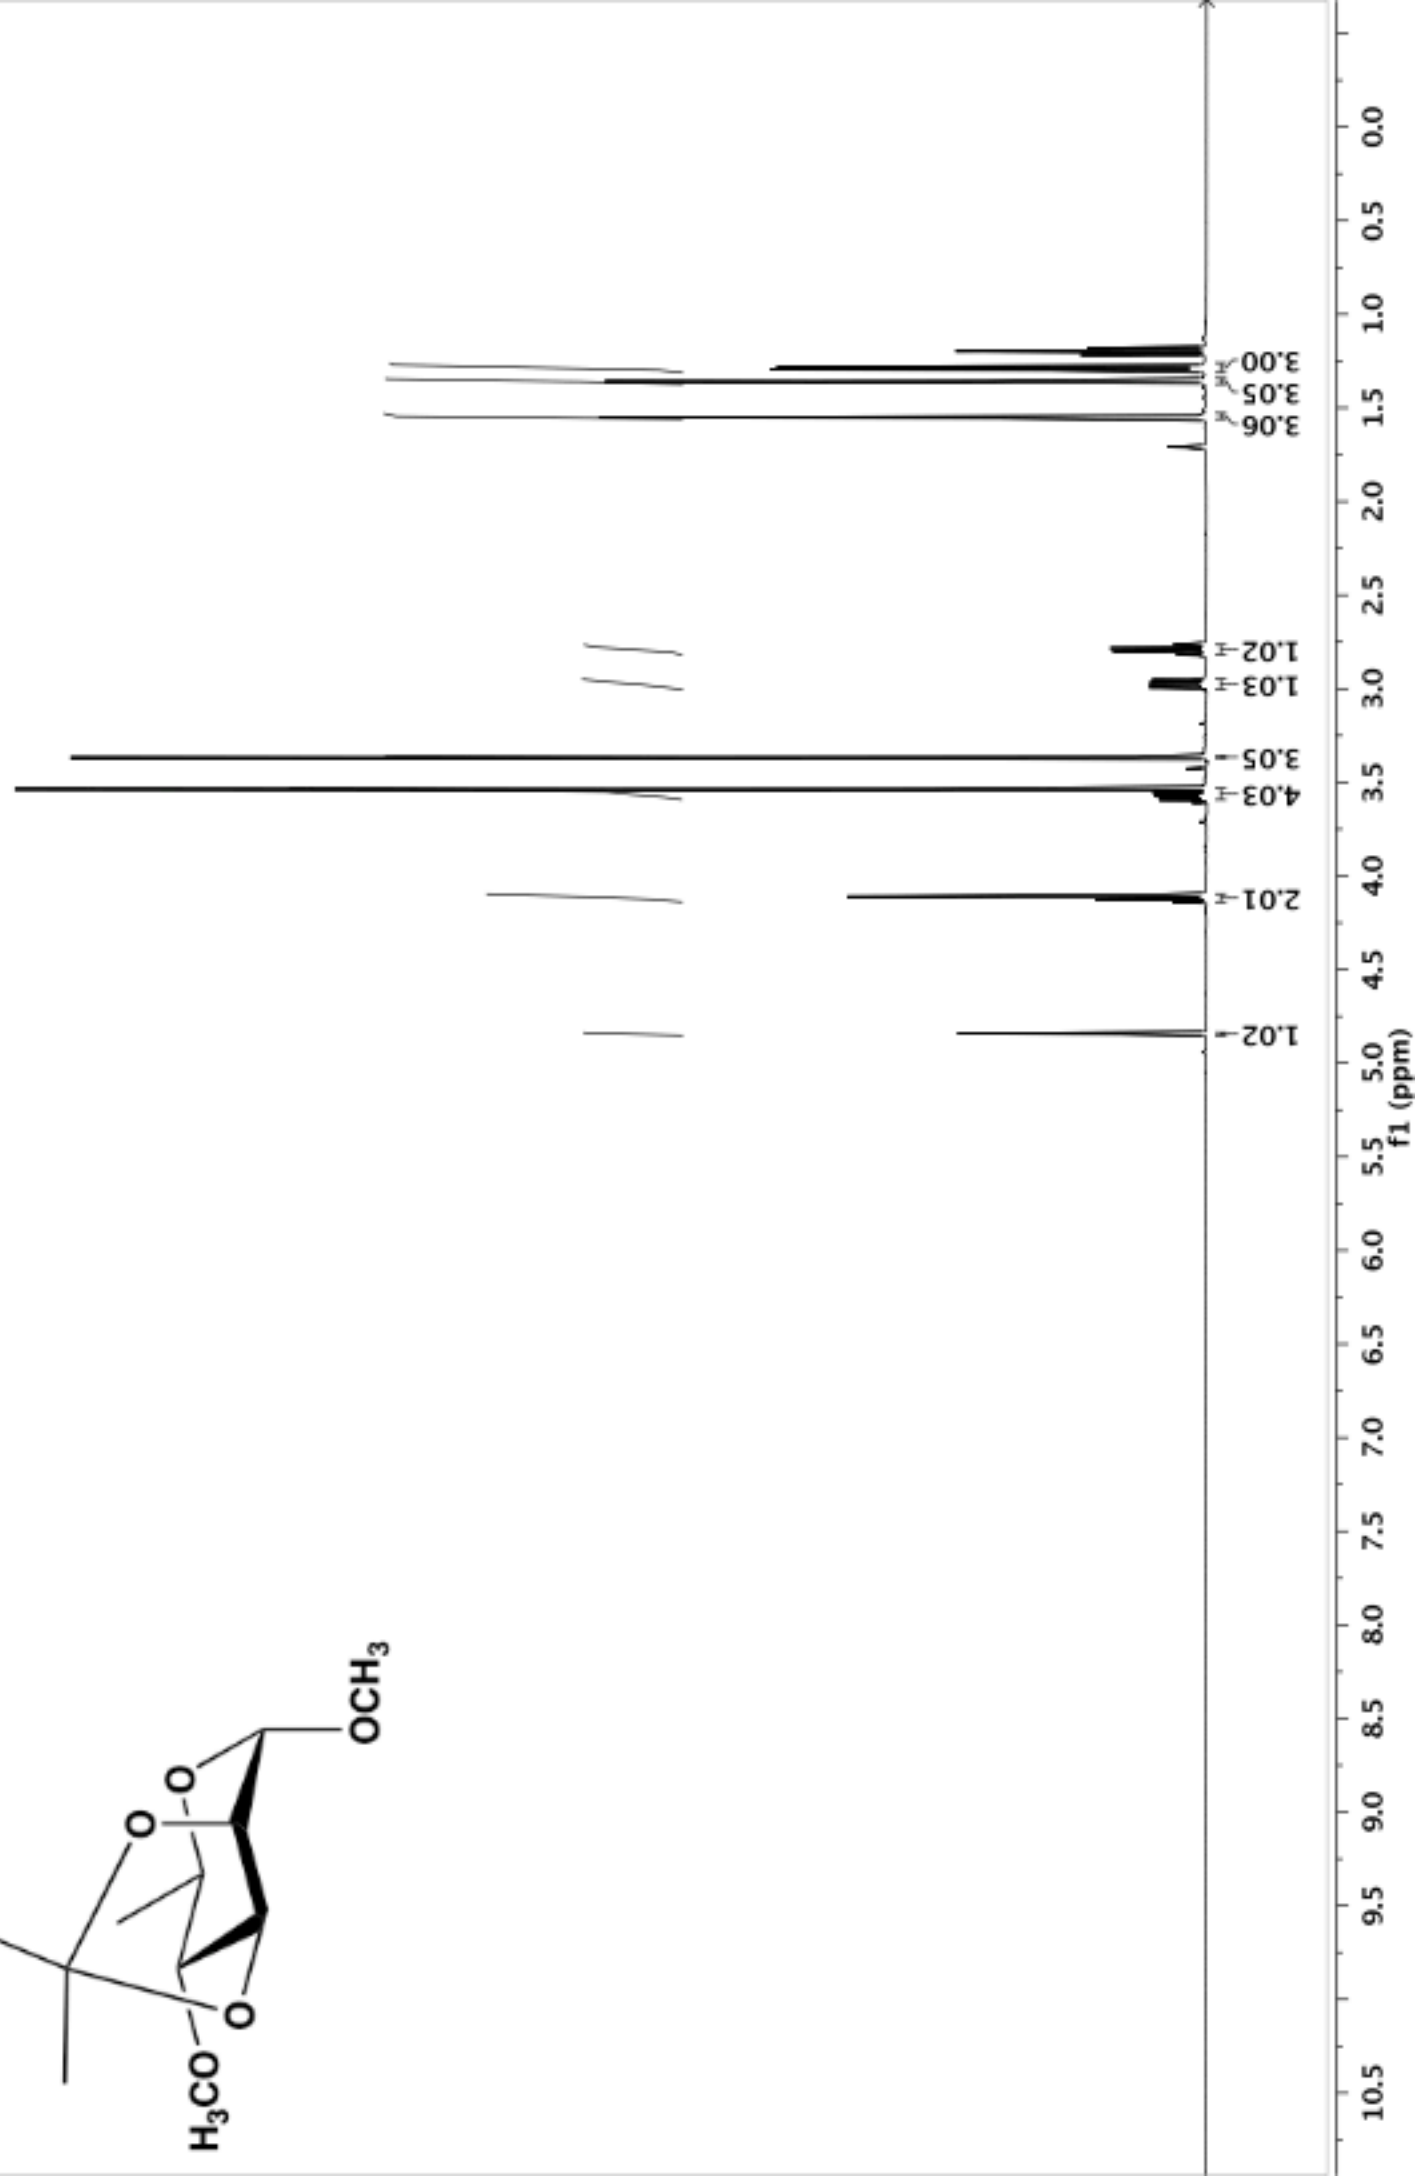

<sup>13</sup>C NMR of compound S34

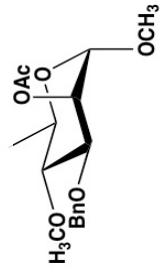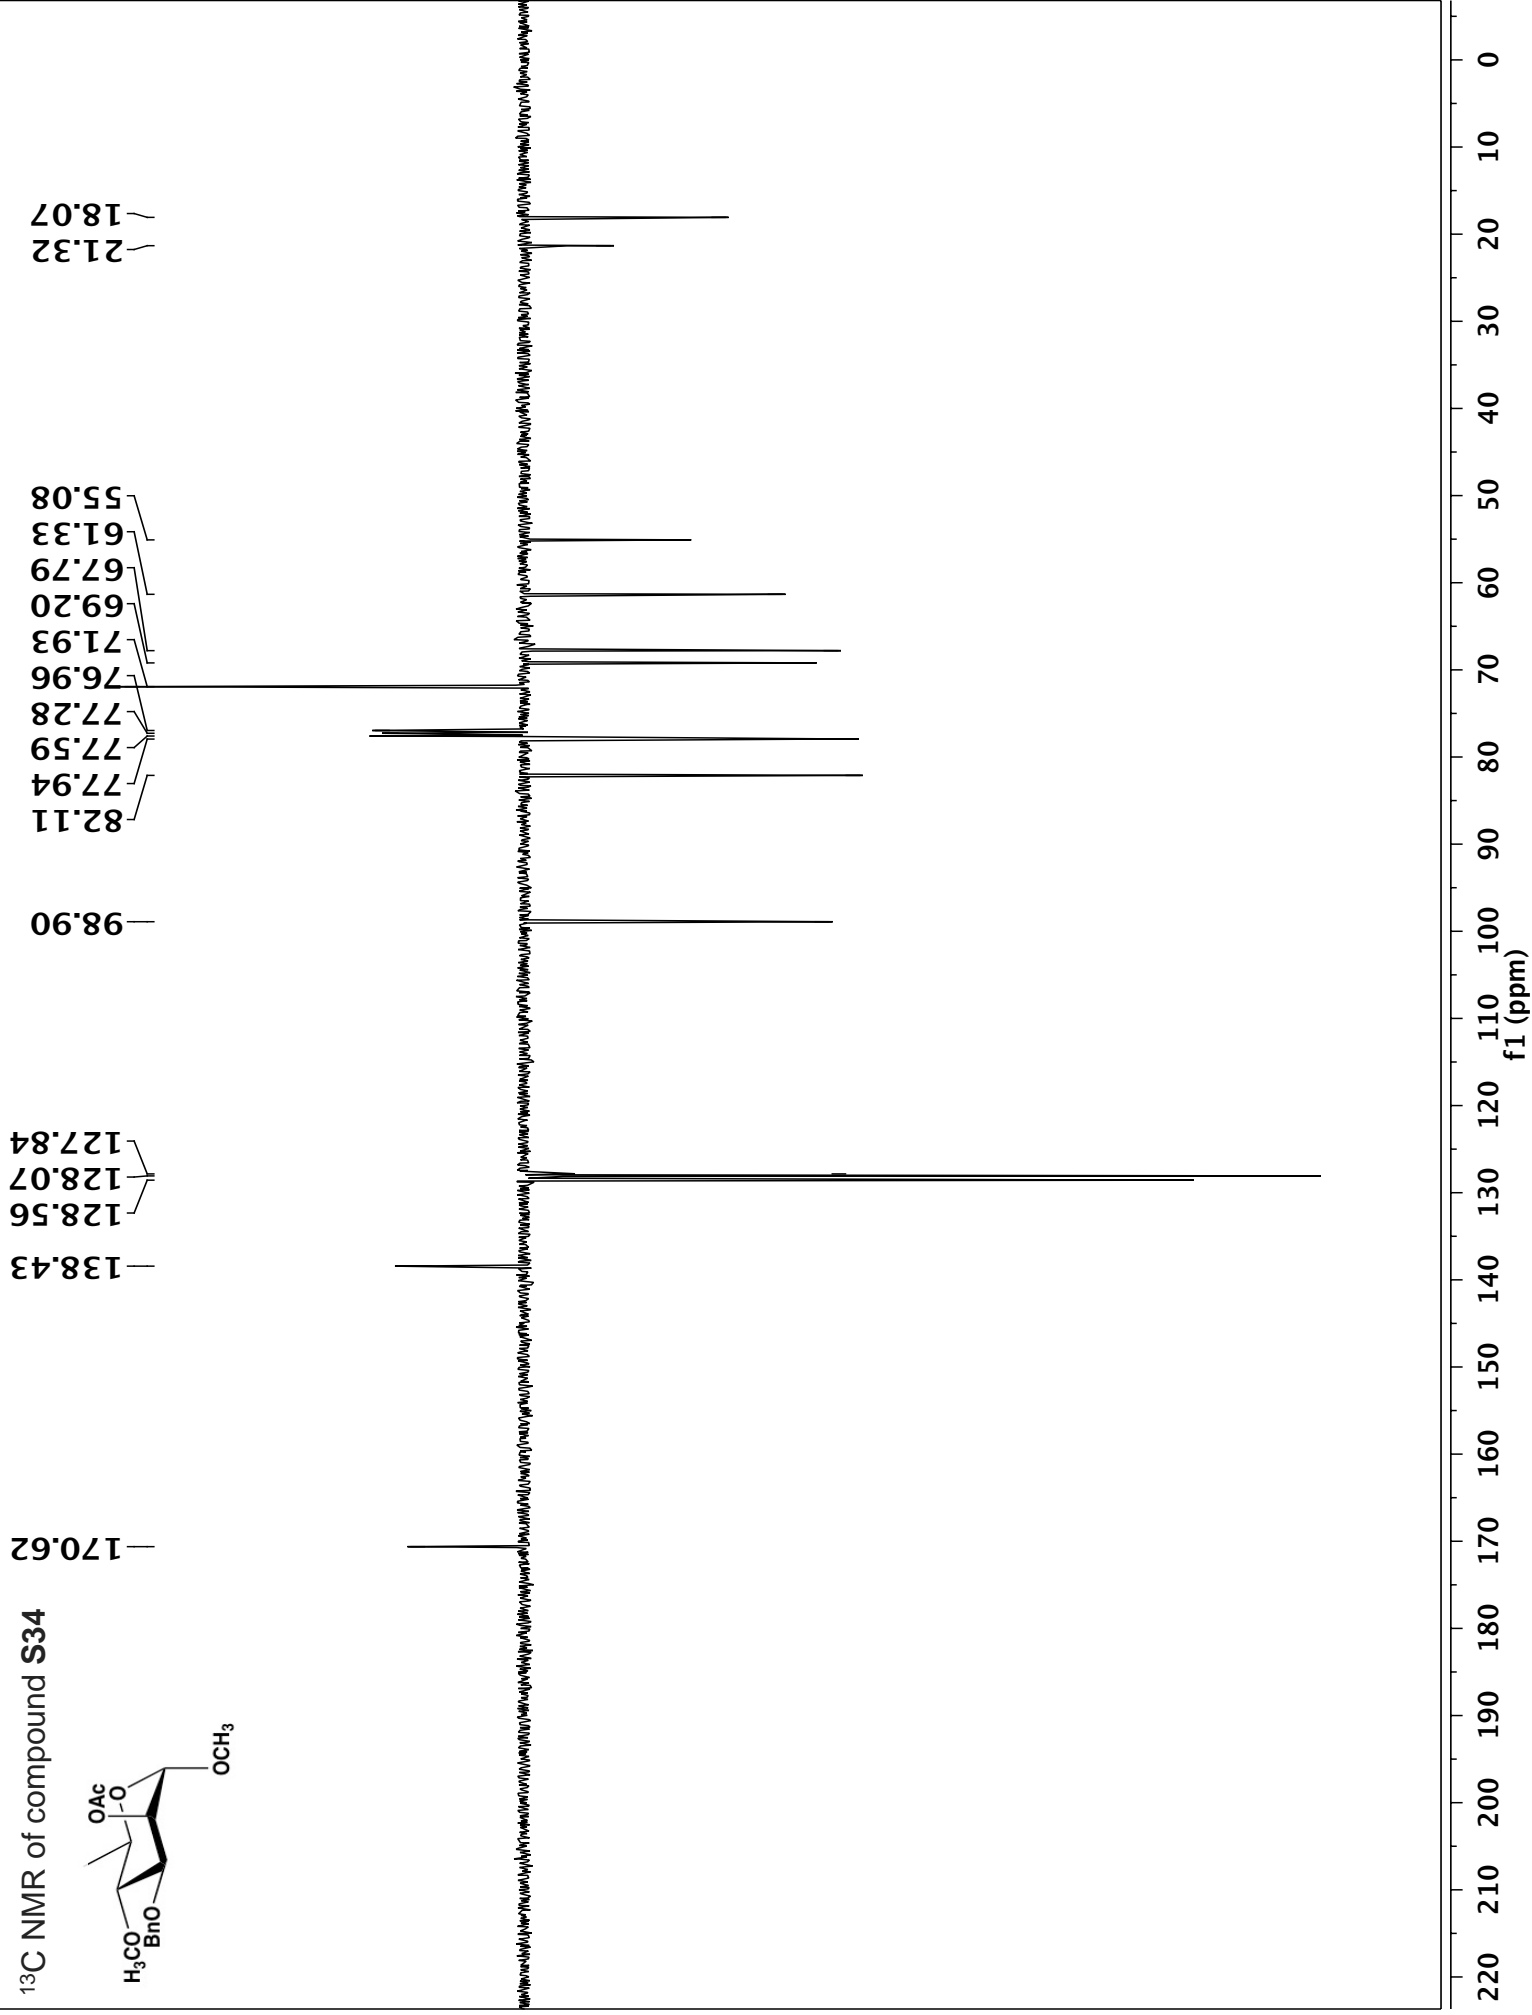

<sup>1</sup>H NMR of compound **S34**

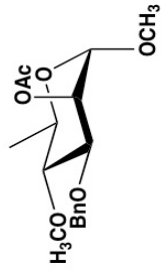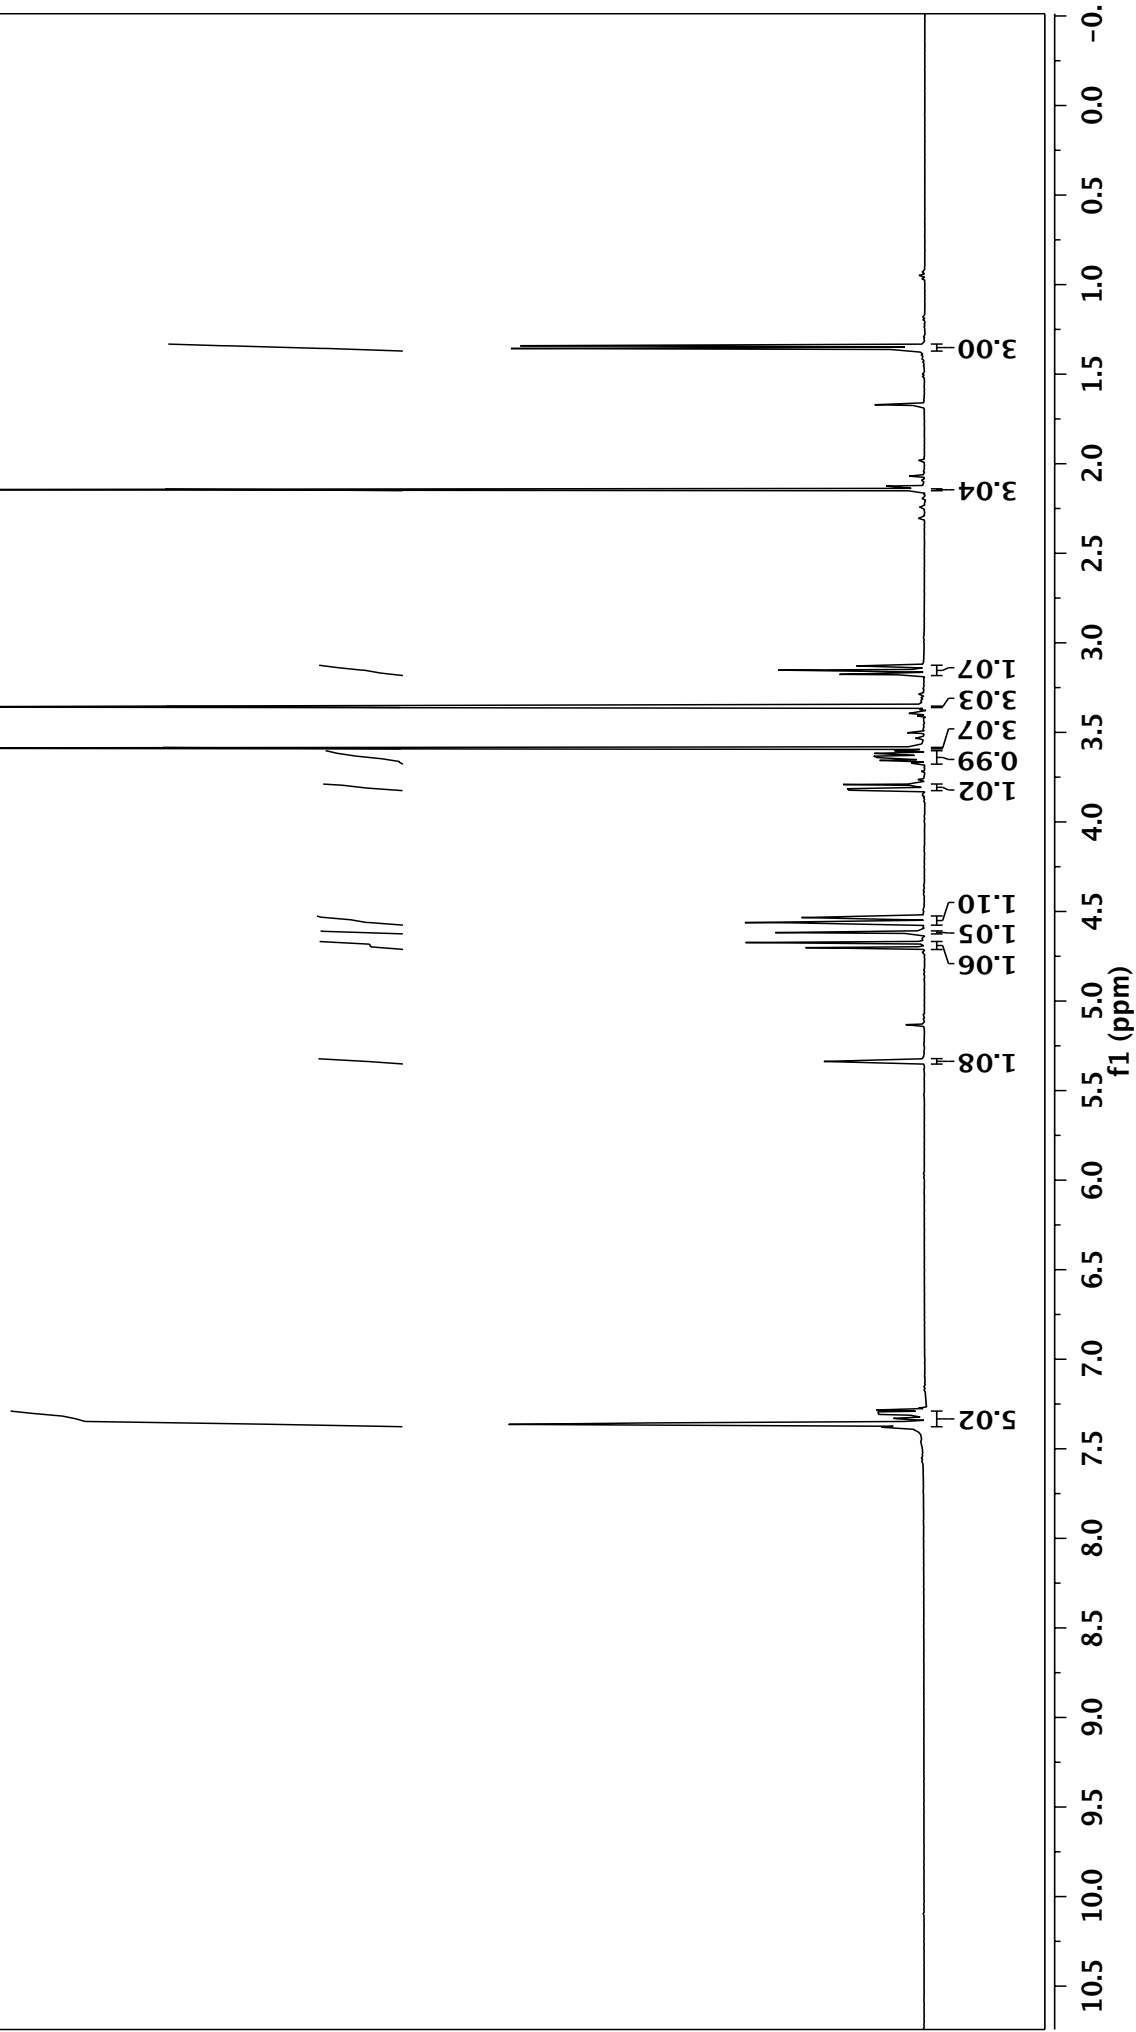



<sup>1</sup>H NMR of compound 29

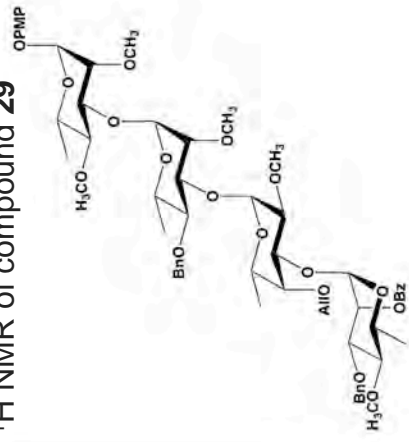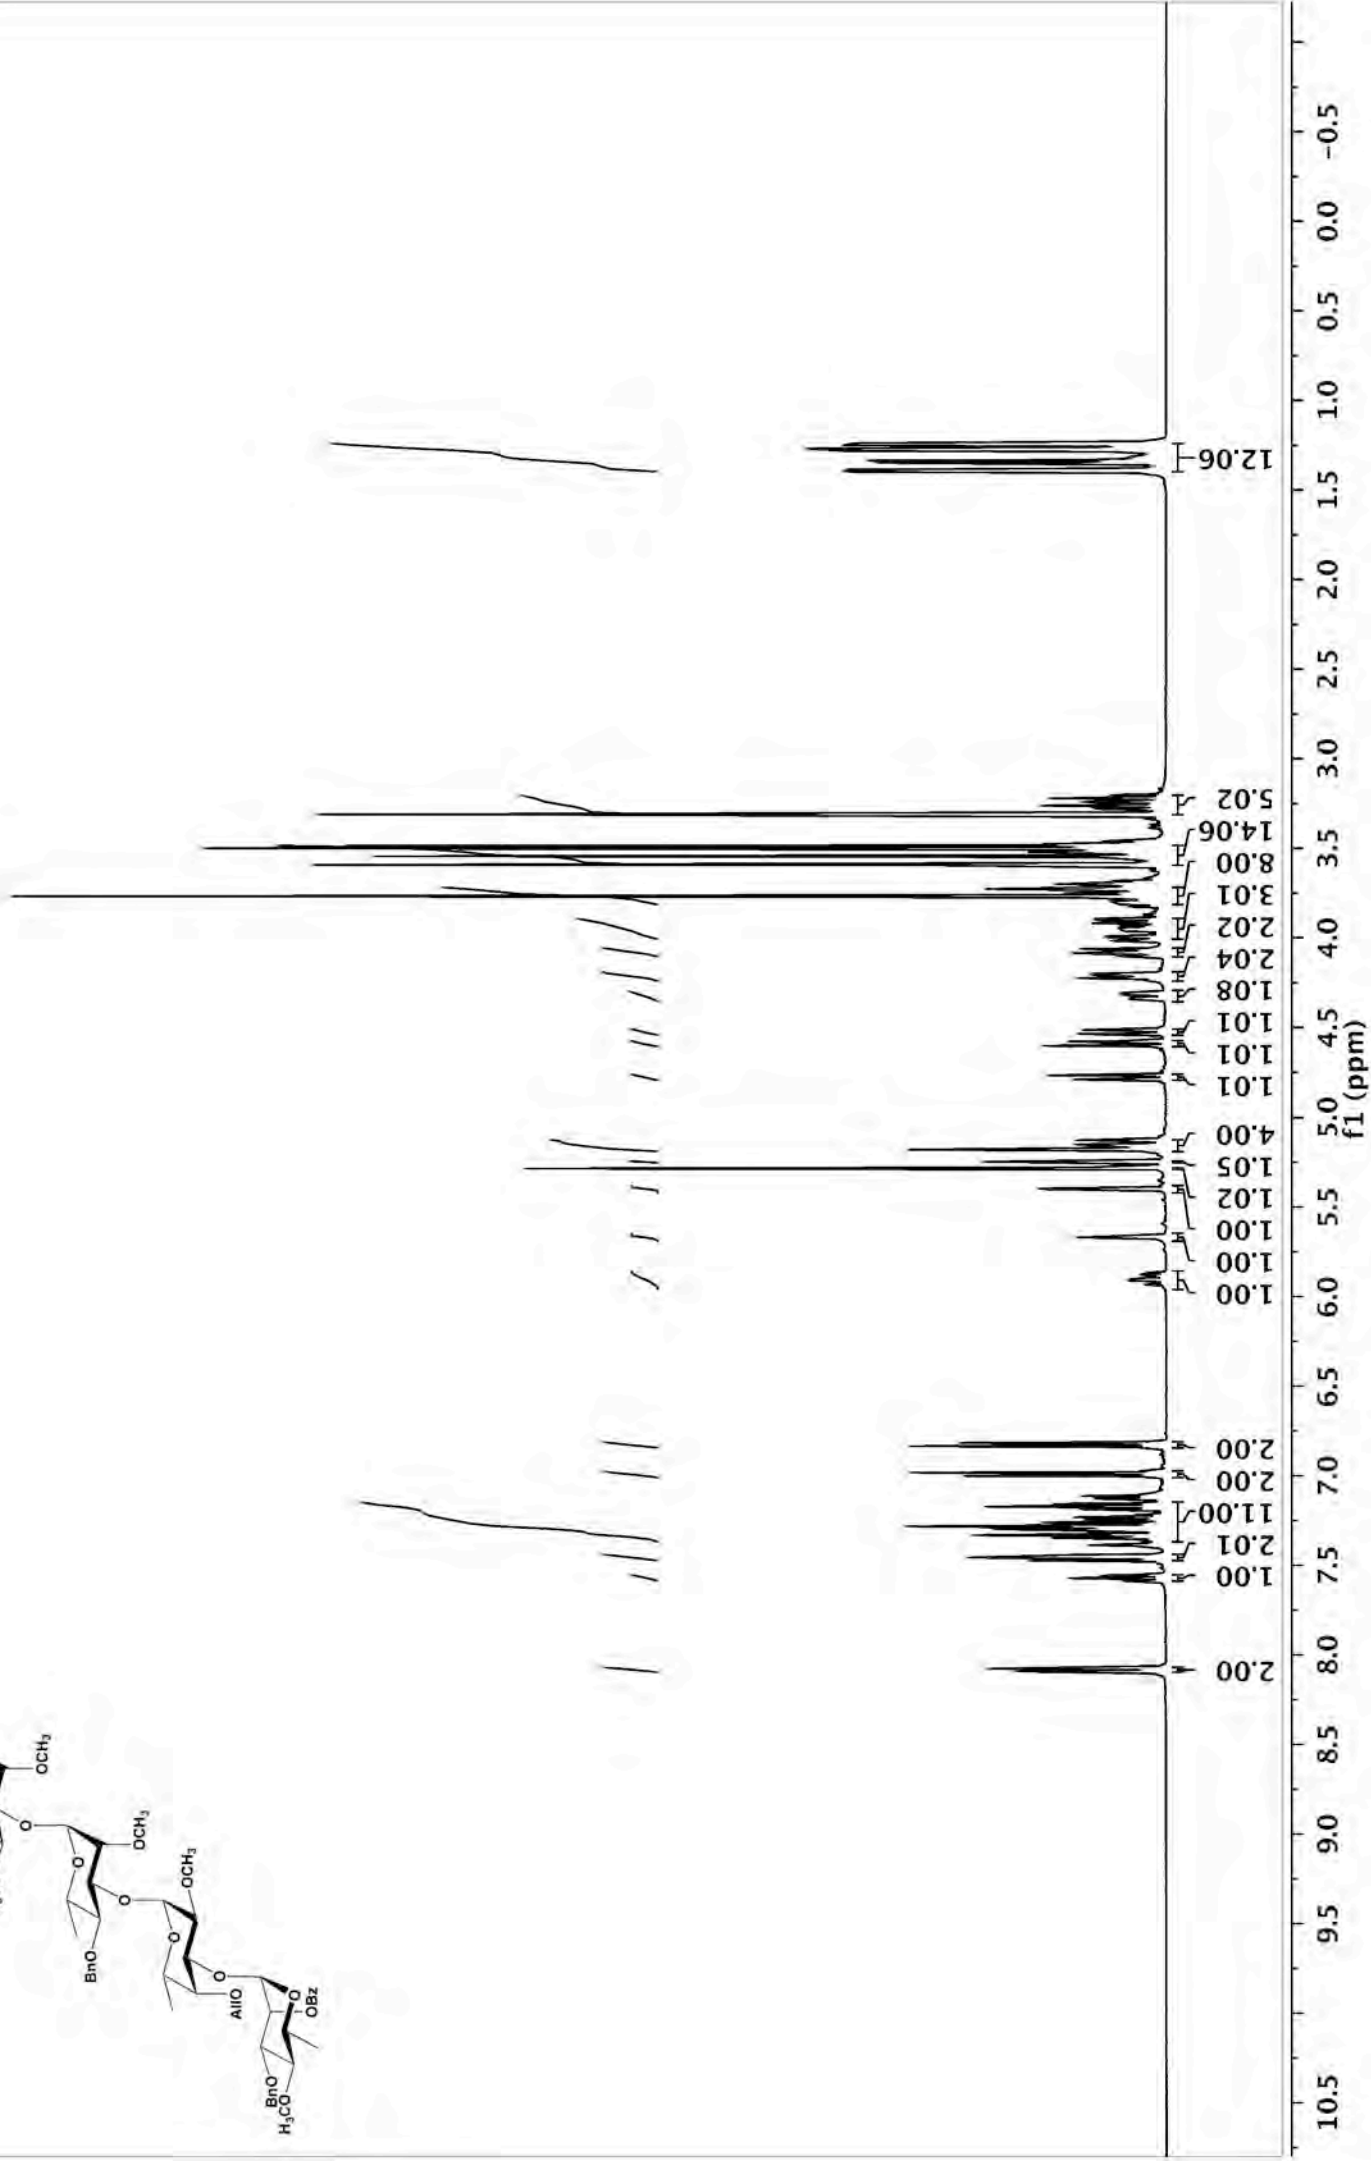

<sup>13</sup>C NMR of compound 30

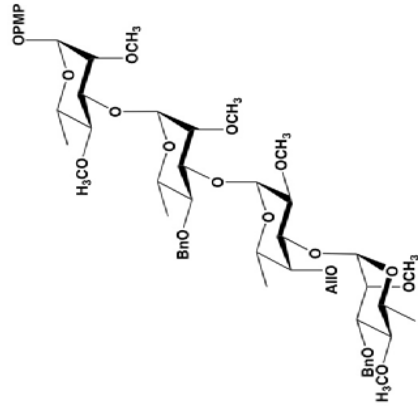

154.89  
150.46  
128.32  
128.08  
127.85  
127.61  
127.26  
117.48  
117.25  
114.60  
99.62  
98.51  
98.43  
78.87  
78.40  
77.29  
77.03  
76.78  
74.34  
72.22  
68.64  
58.72  
58.12  
57.64  
55.65  
18.20  
17.92  
17.84  
16.75

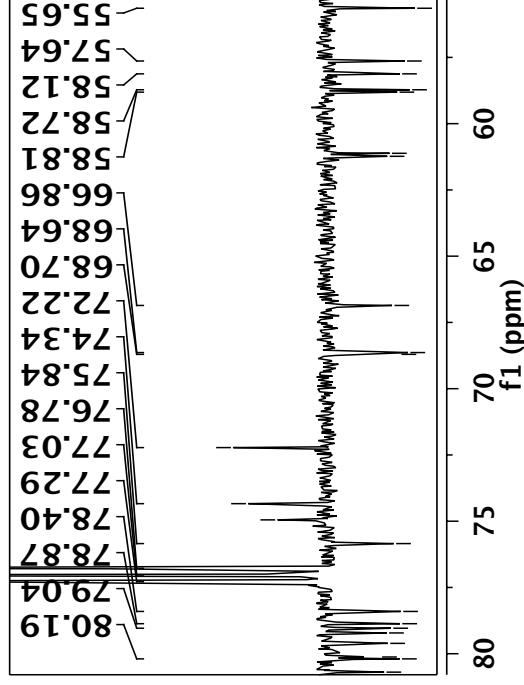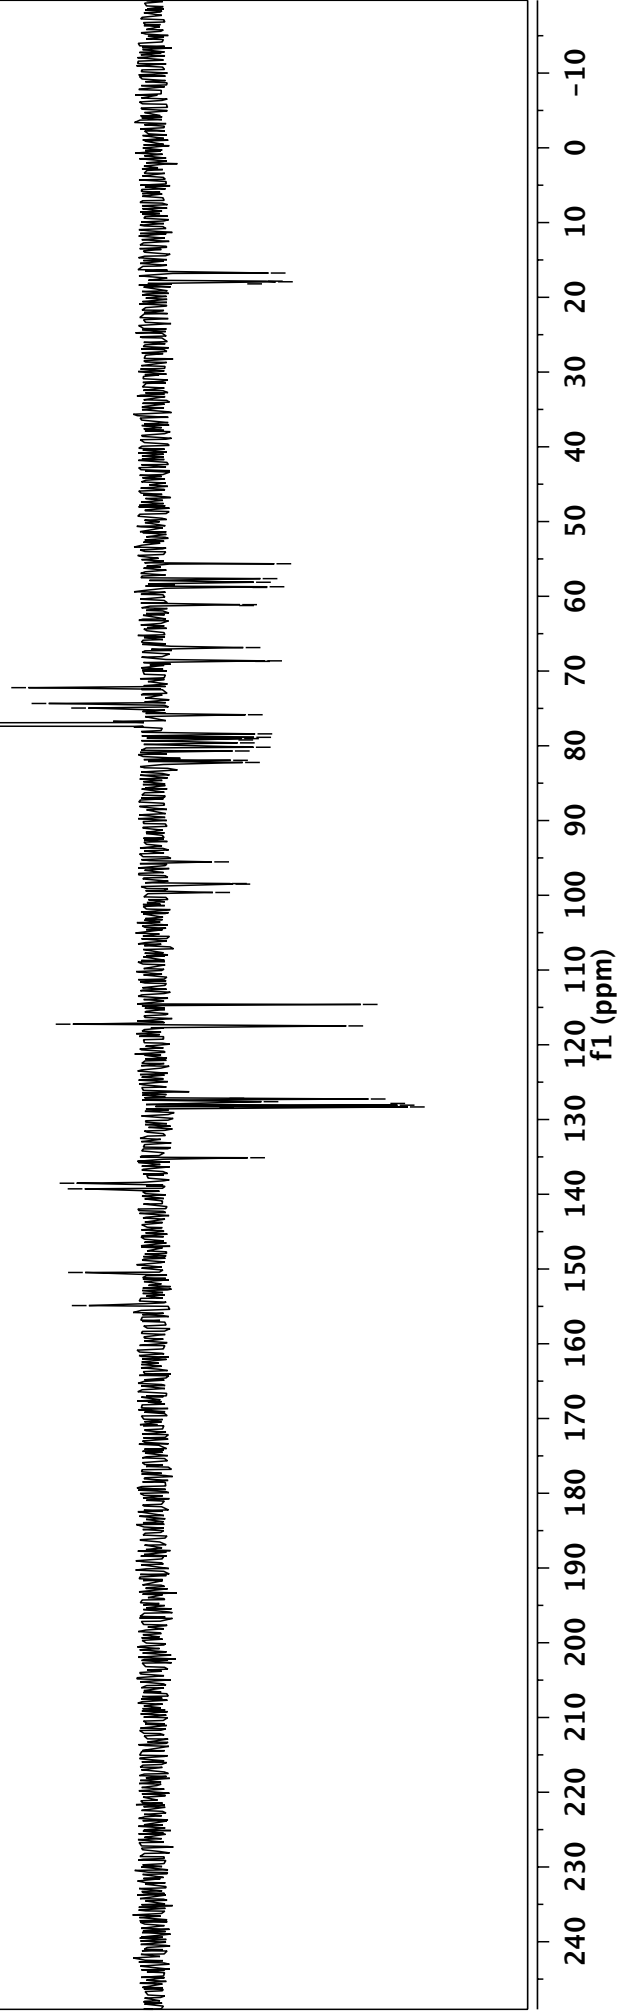



<sup>1</sup>H NMR of compound 30

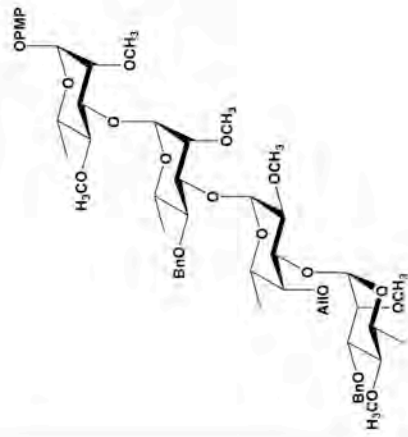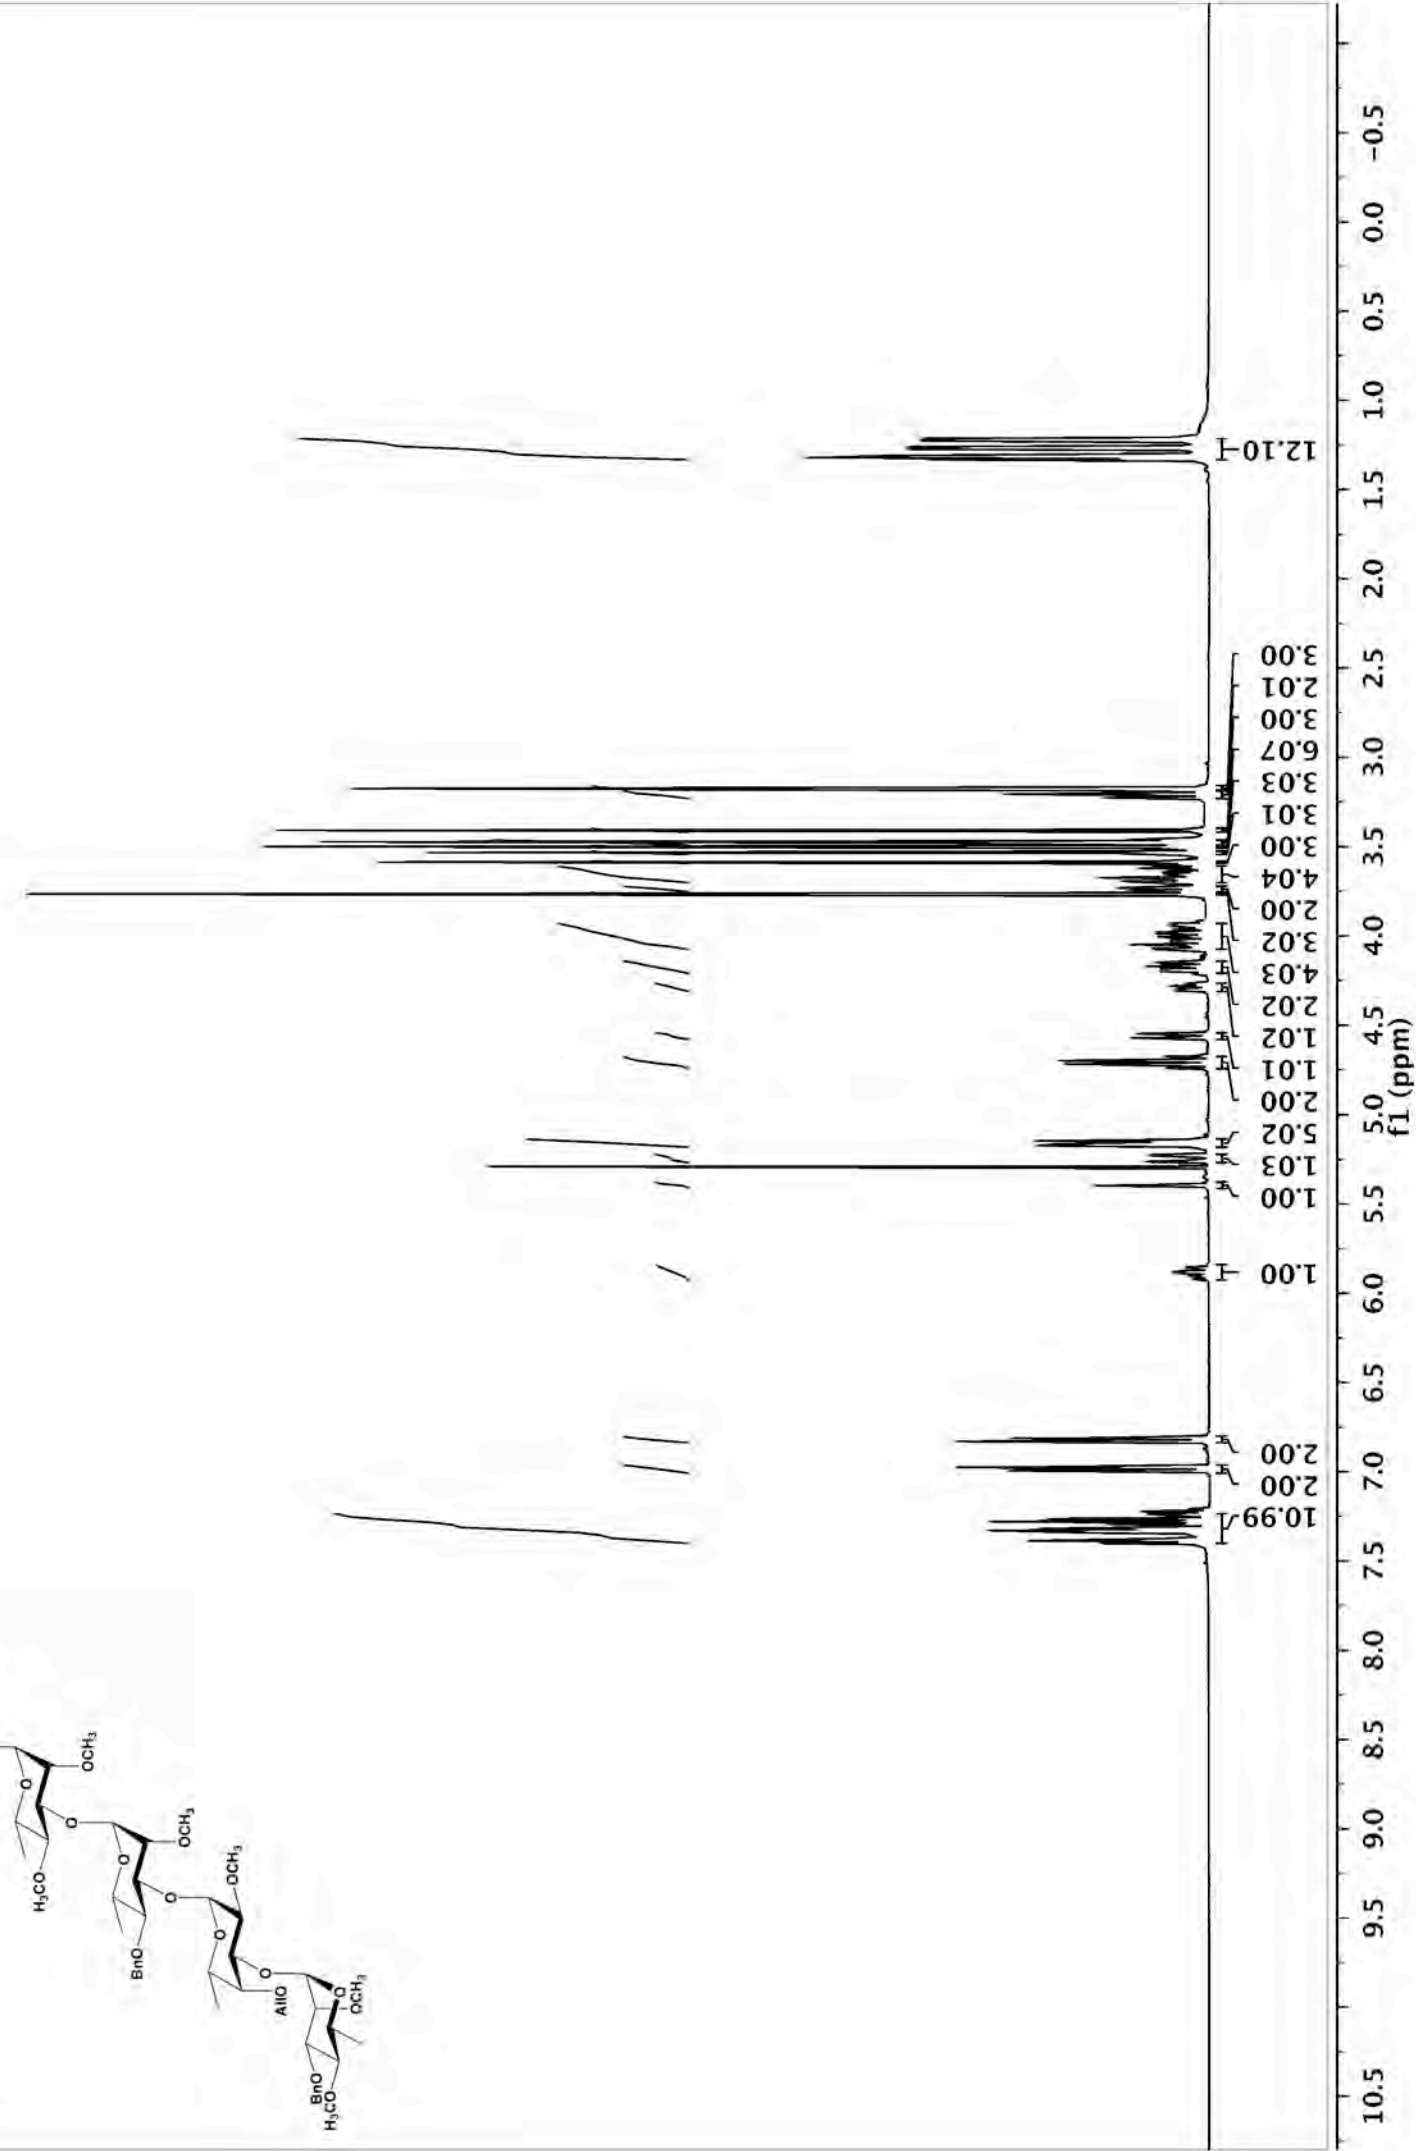

<sup>13</sup>C NMR of compound S35

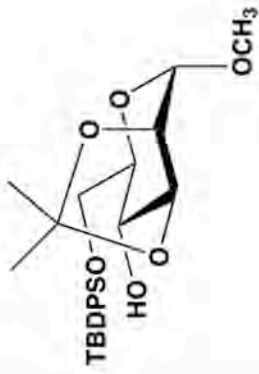

- 135.67
- 135.60
- 133.11
- 132.96
- 129.83
- 129.82
- 127.79
- 127.75
- 109.51
- 98.26
- 78.22
- 77.29
- 77.03
- 76.78
- 75.33
- 70.61
- 69.50
- 64.65
- 54.89
- 27.90
- 26.83
- 26.12
- 19.24

f1 (ppm)

230 210 190 170 150 130 110 90 70 50 30 10 0 -10

<sup>1</sup>H NMR of compound S35

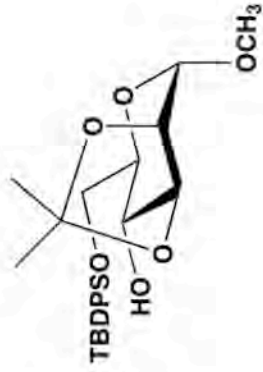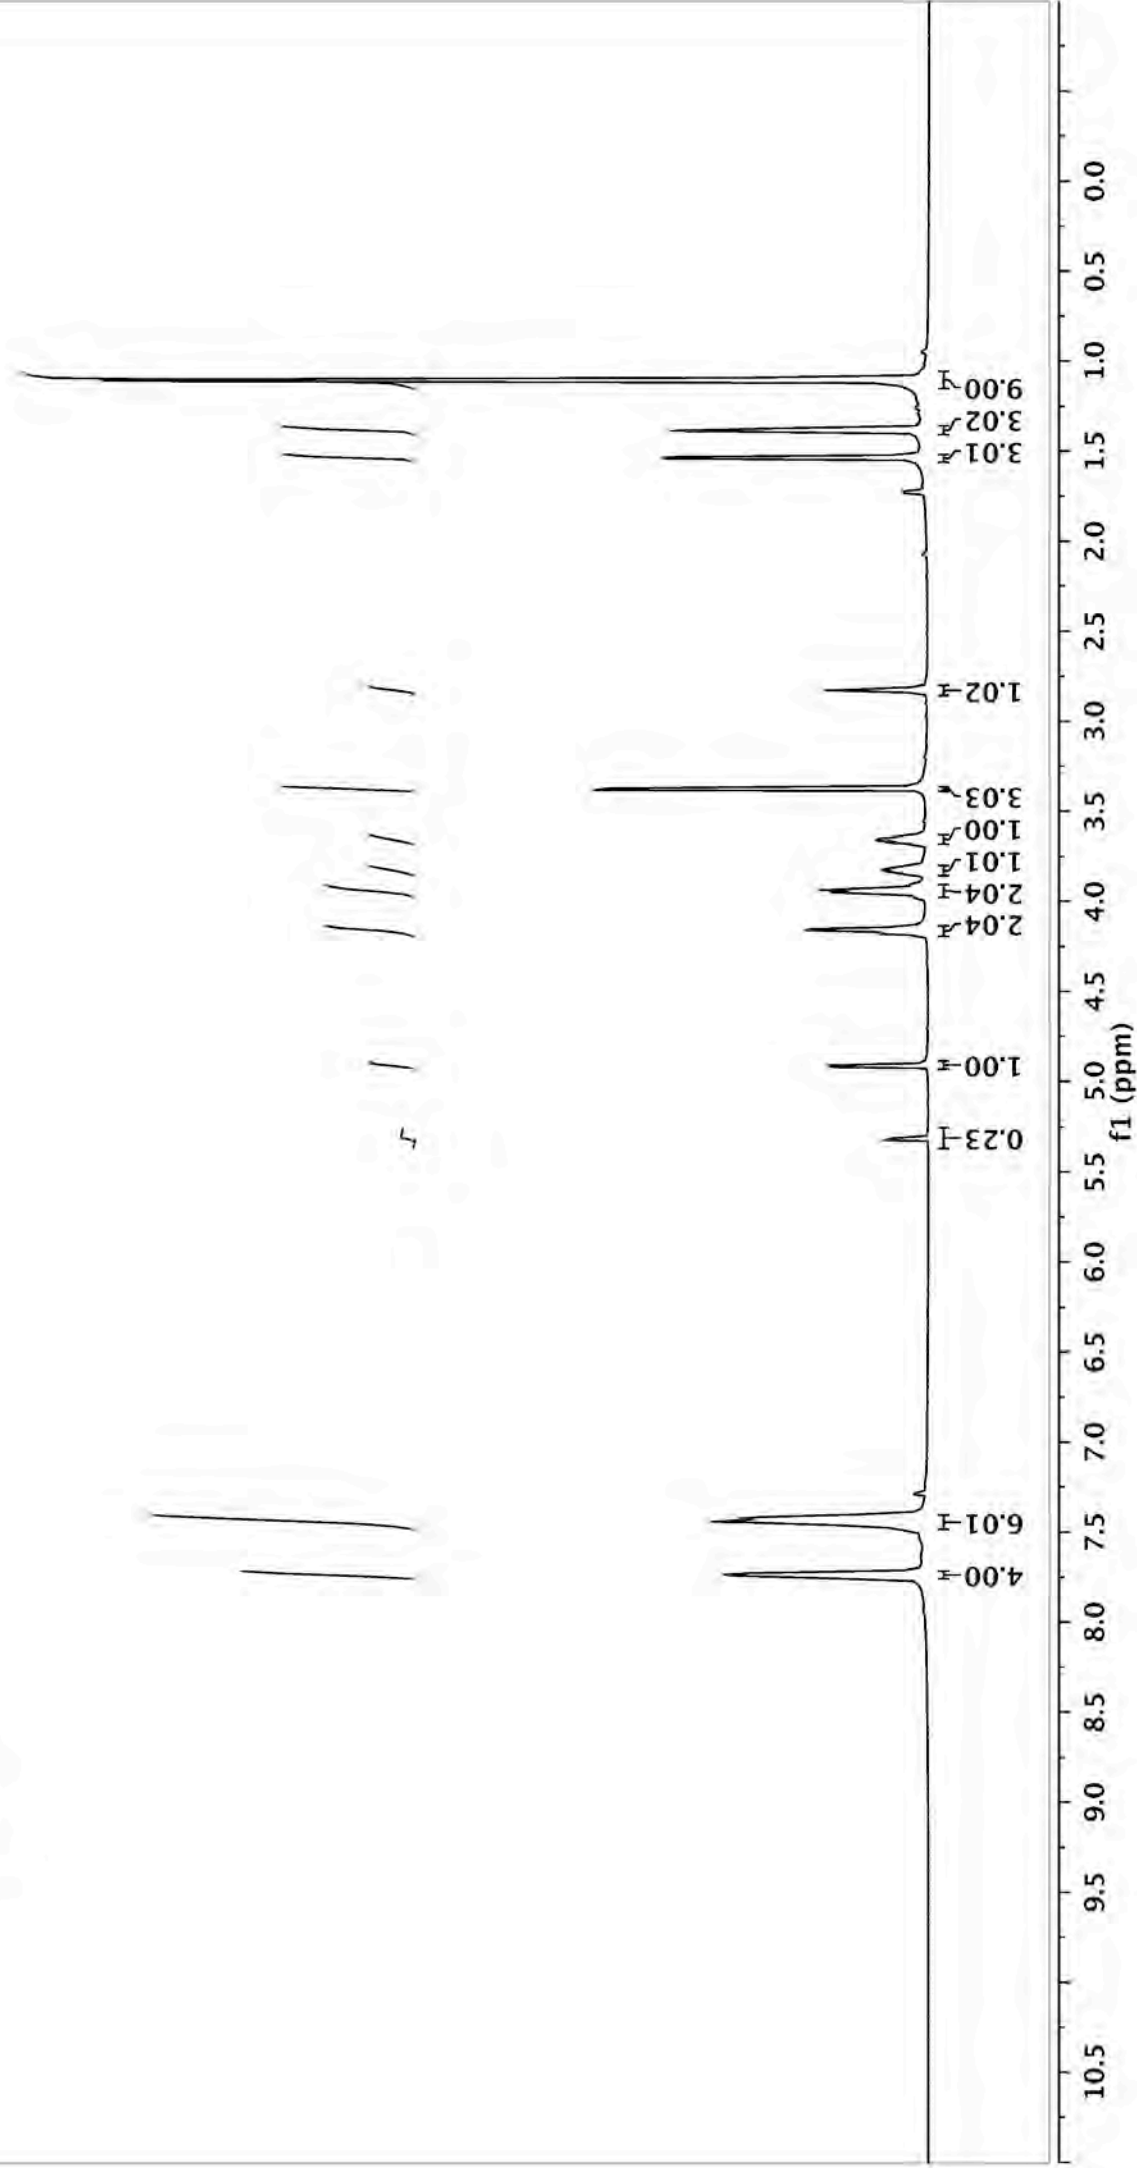

<sup>13</sup>C NMR of compound S36

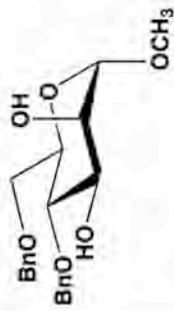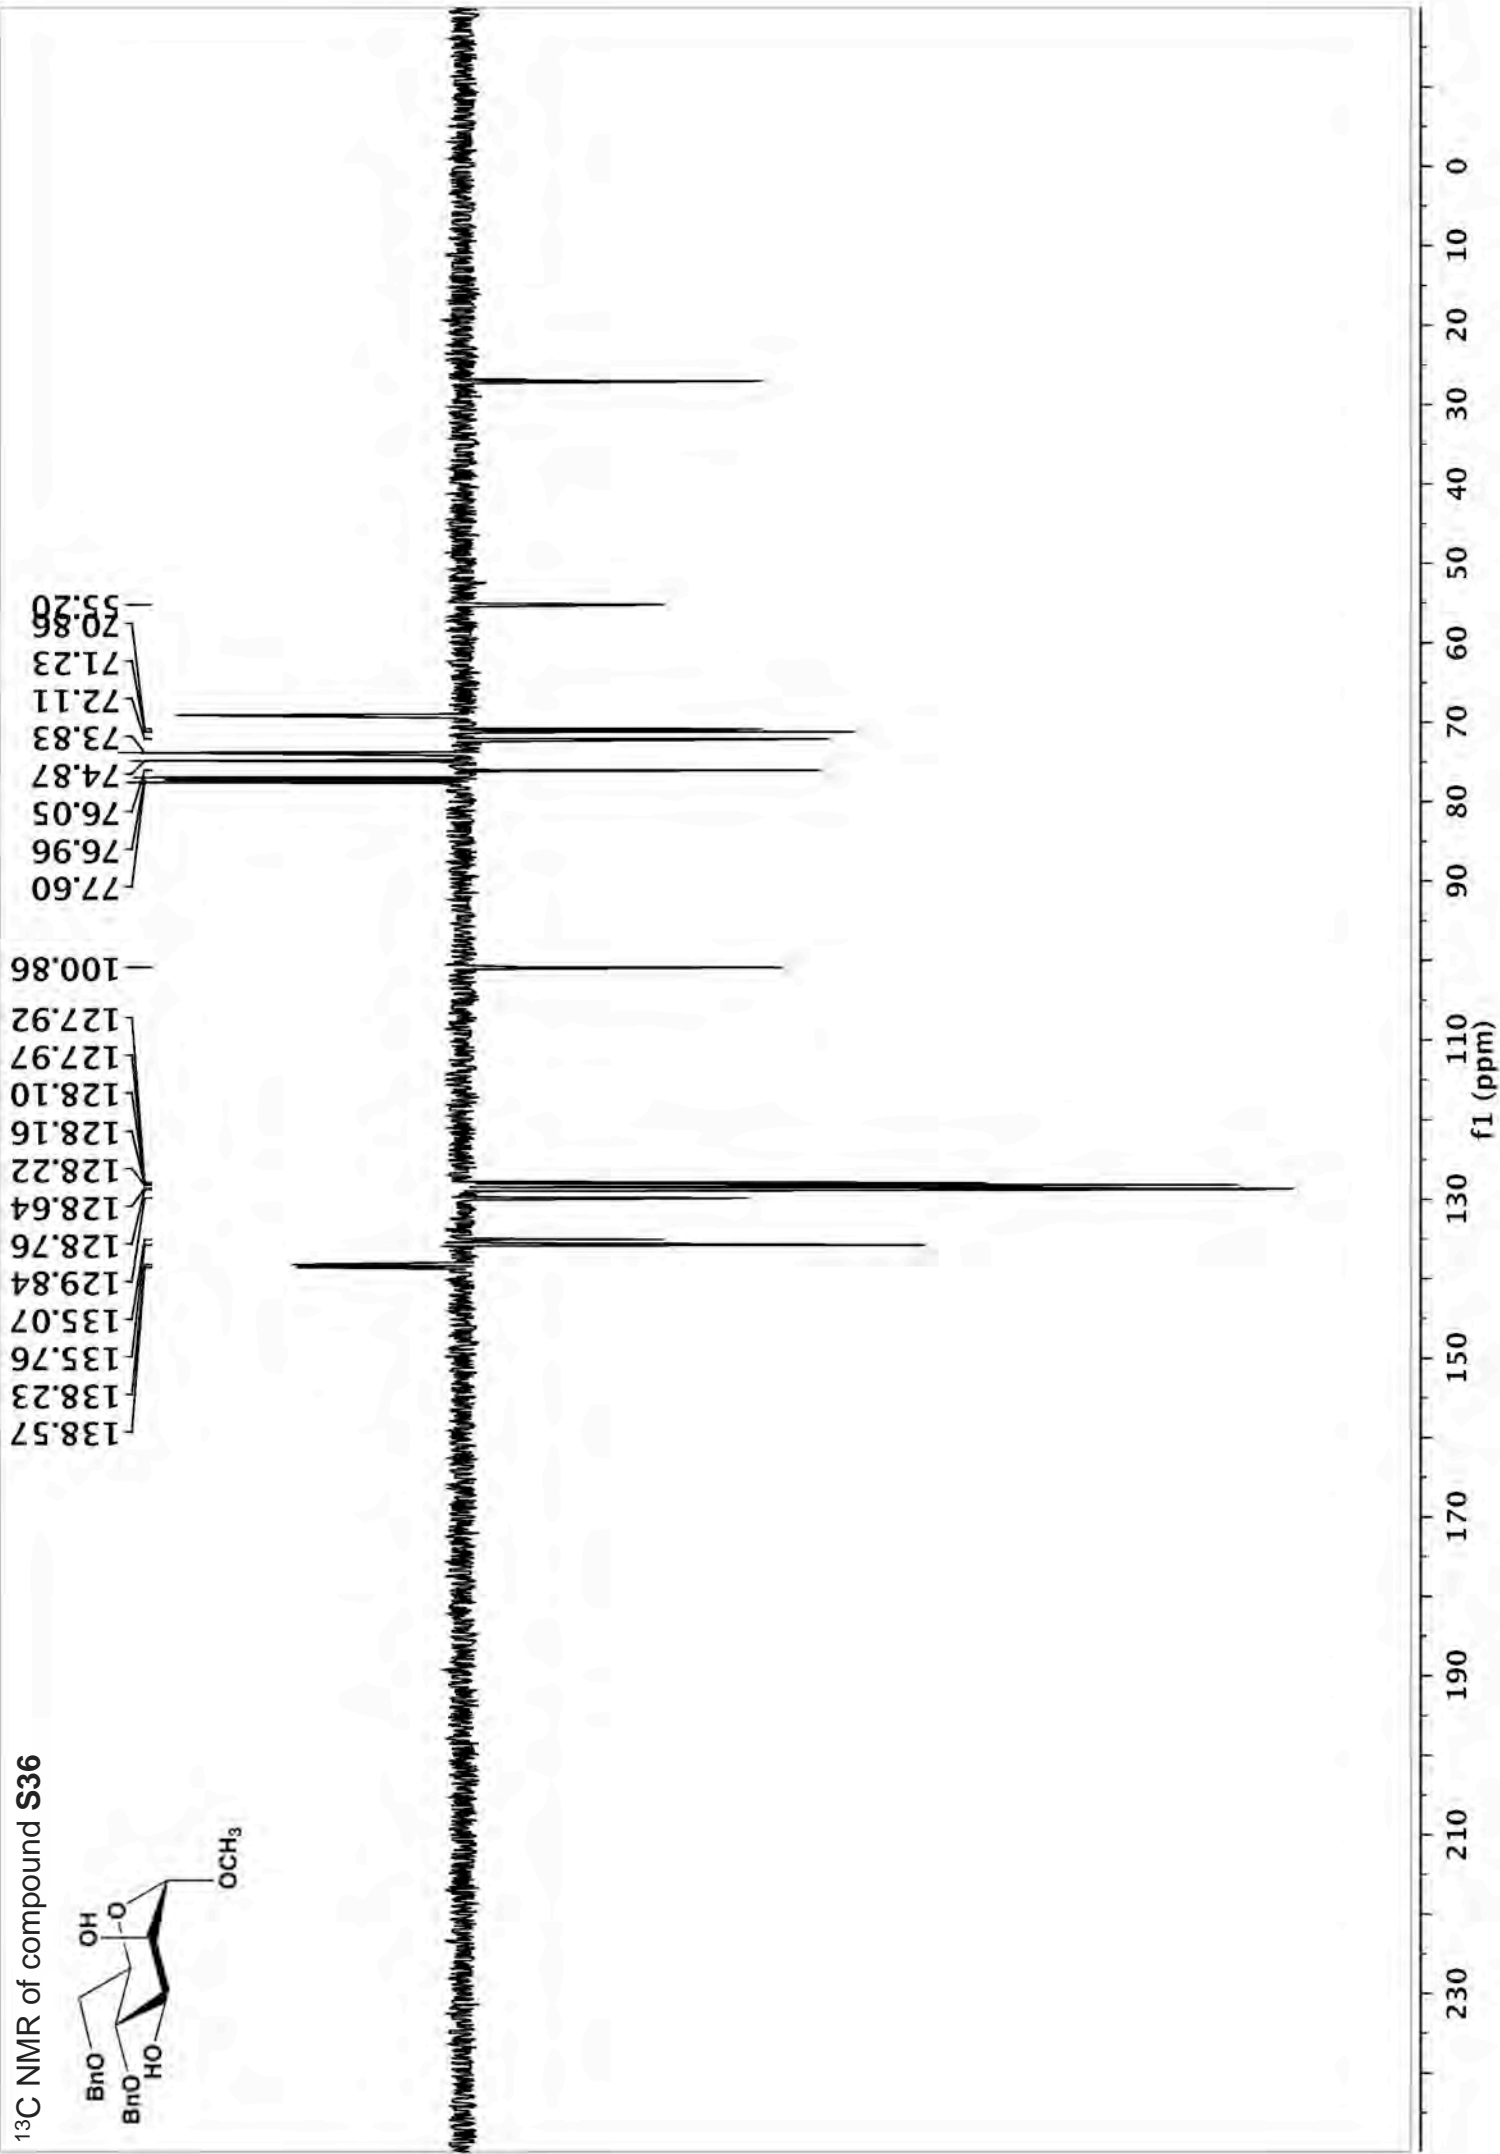

<sup>1</sup>H NMR of compound S36

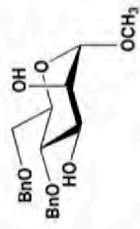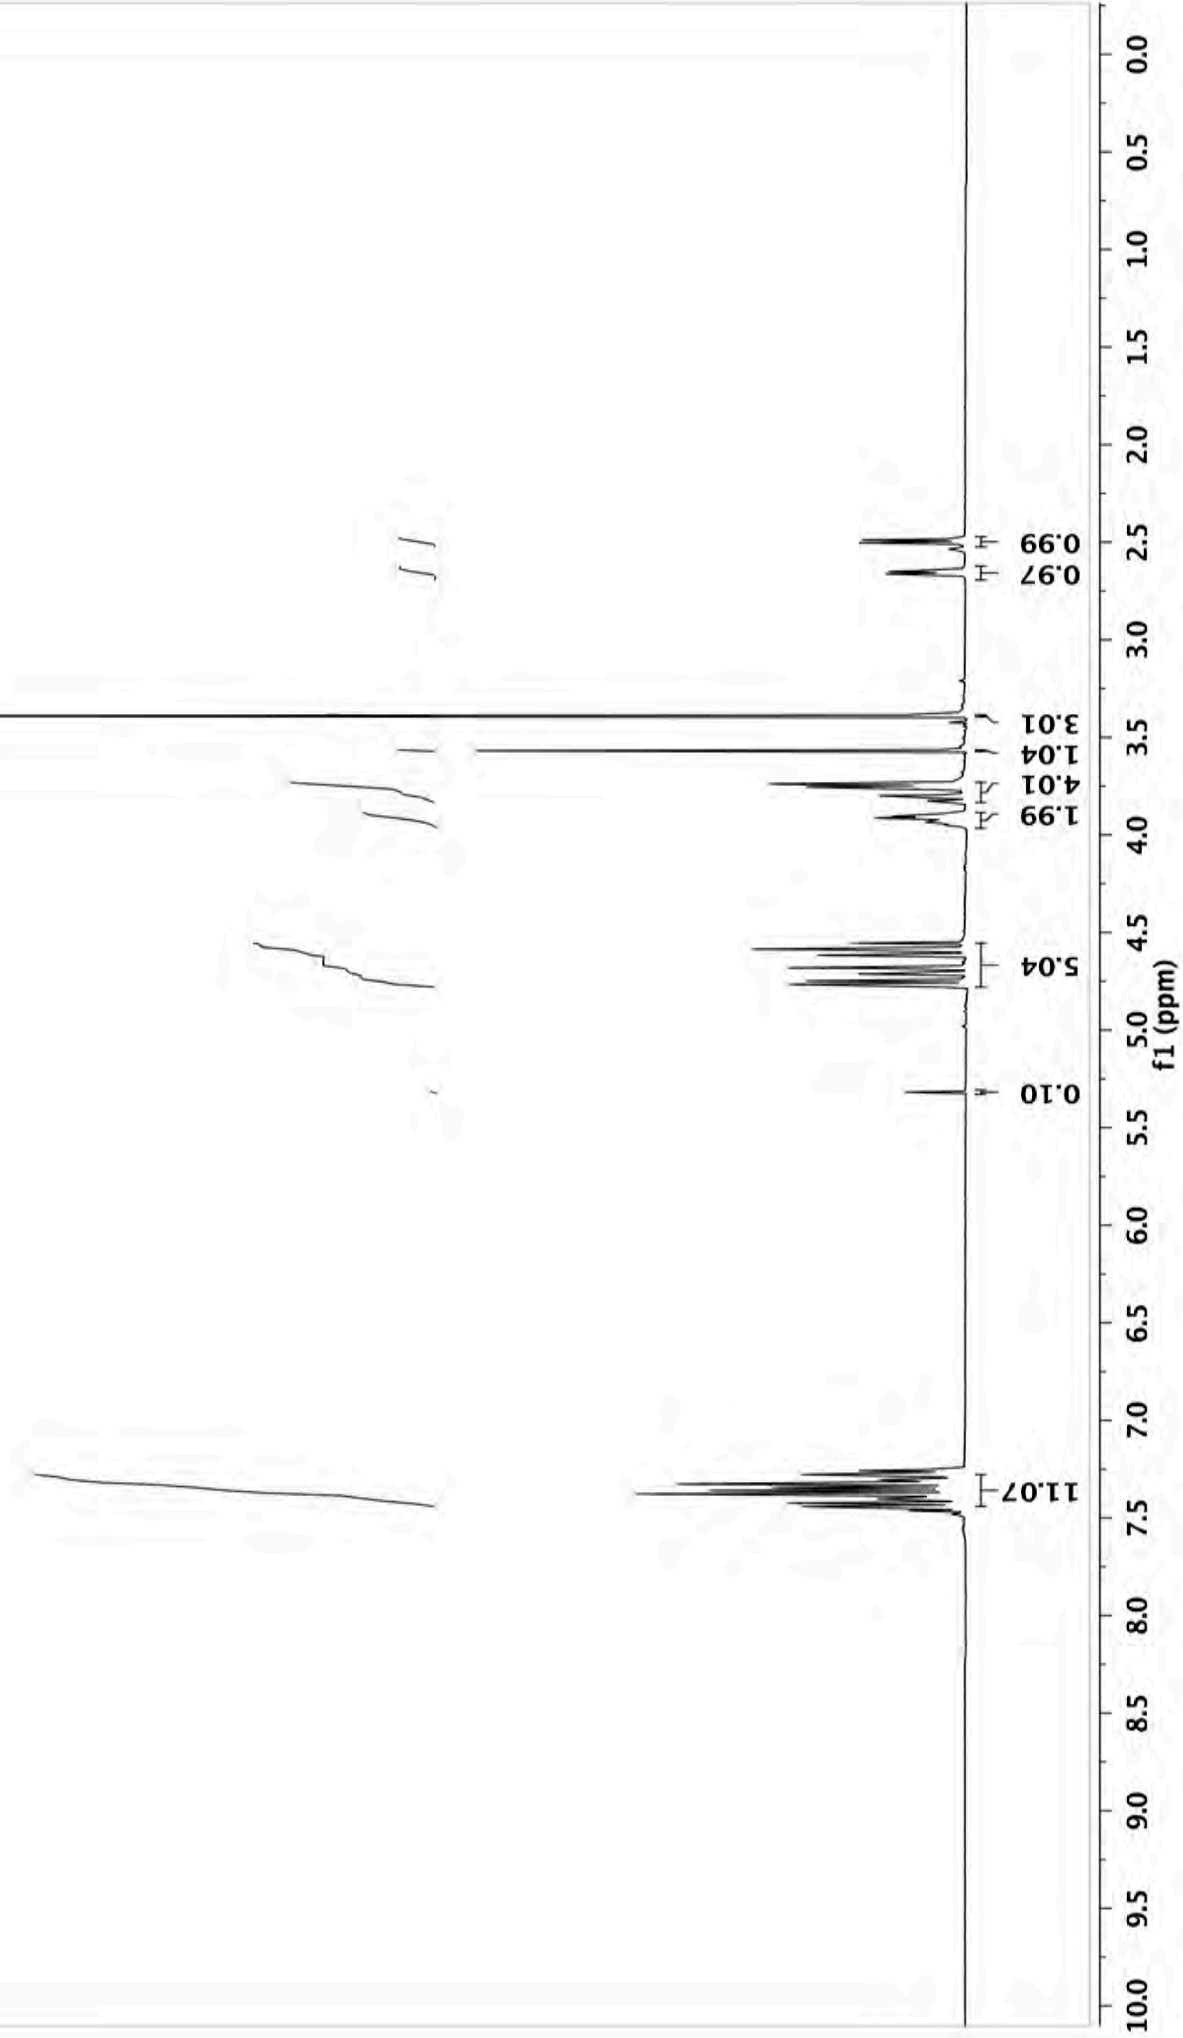



<sup>1</sup>H NMR of compound S37

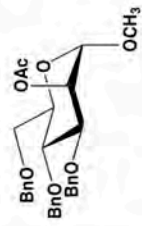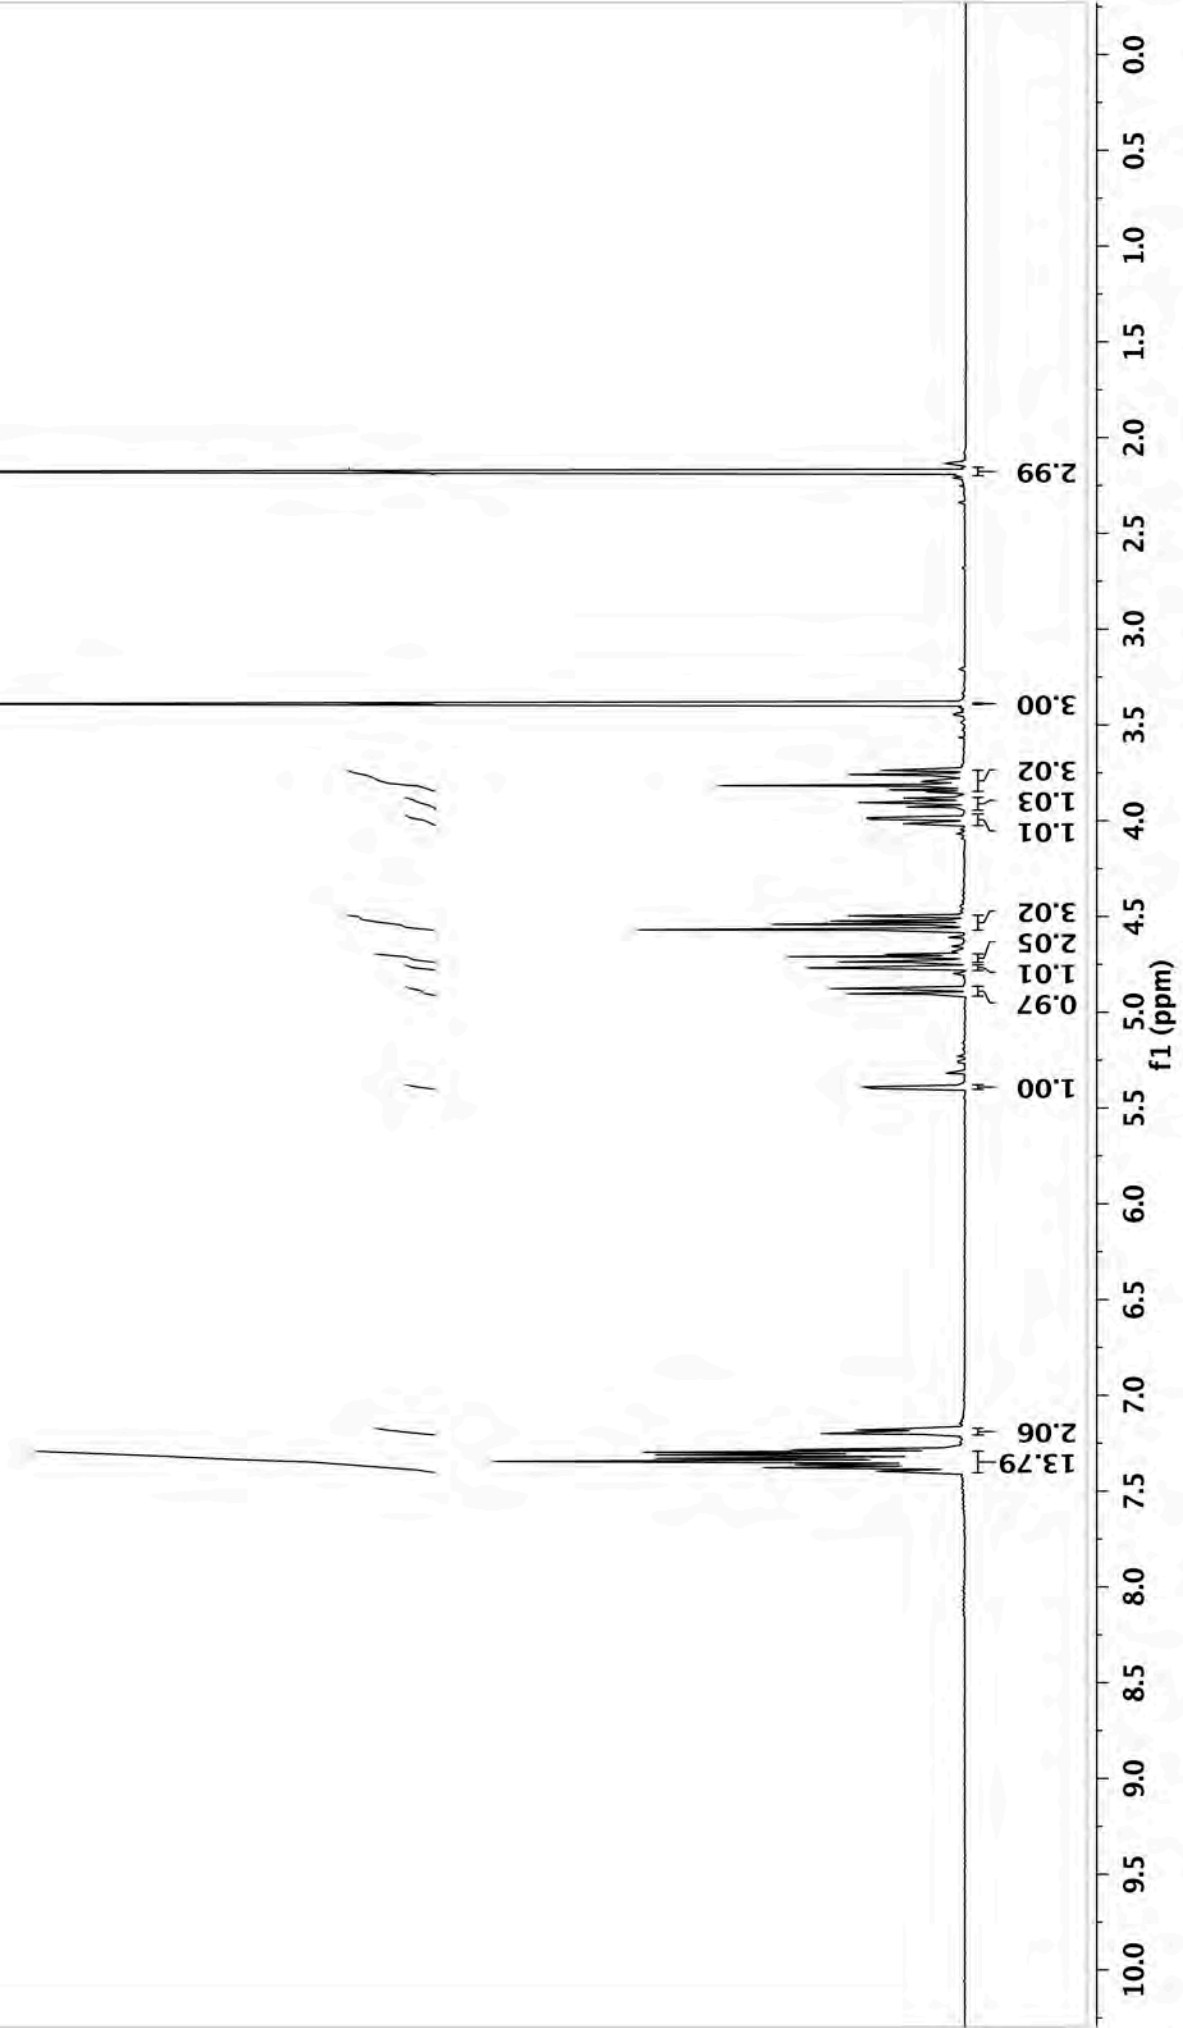

<sup>13</sup>C NMR of compound S38

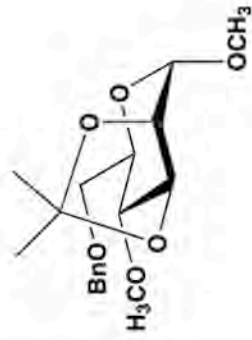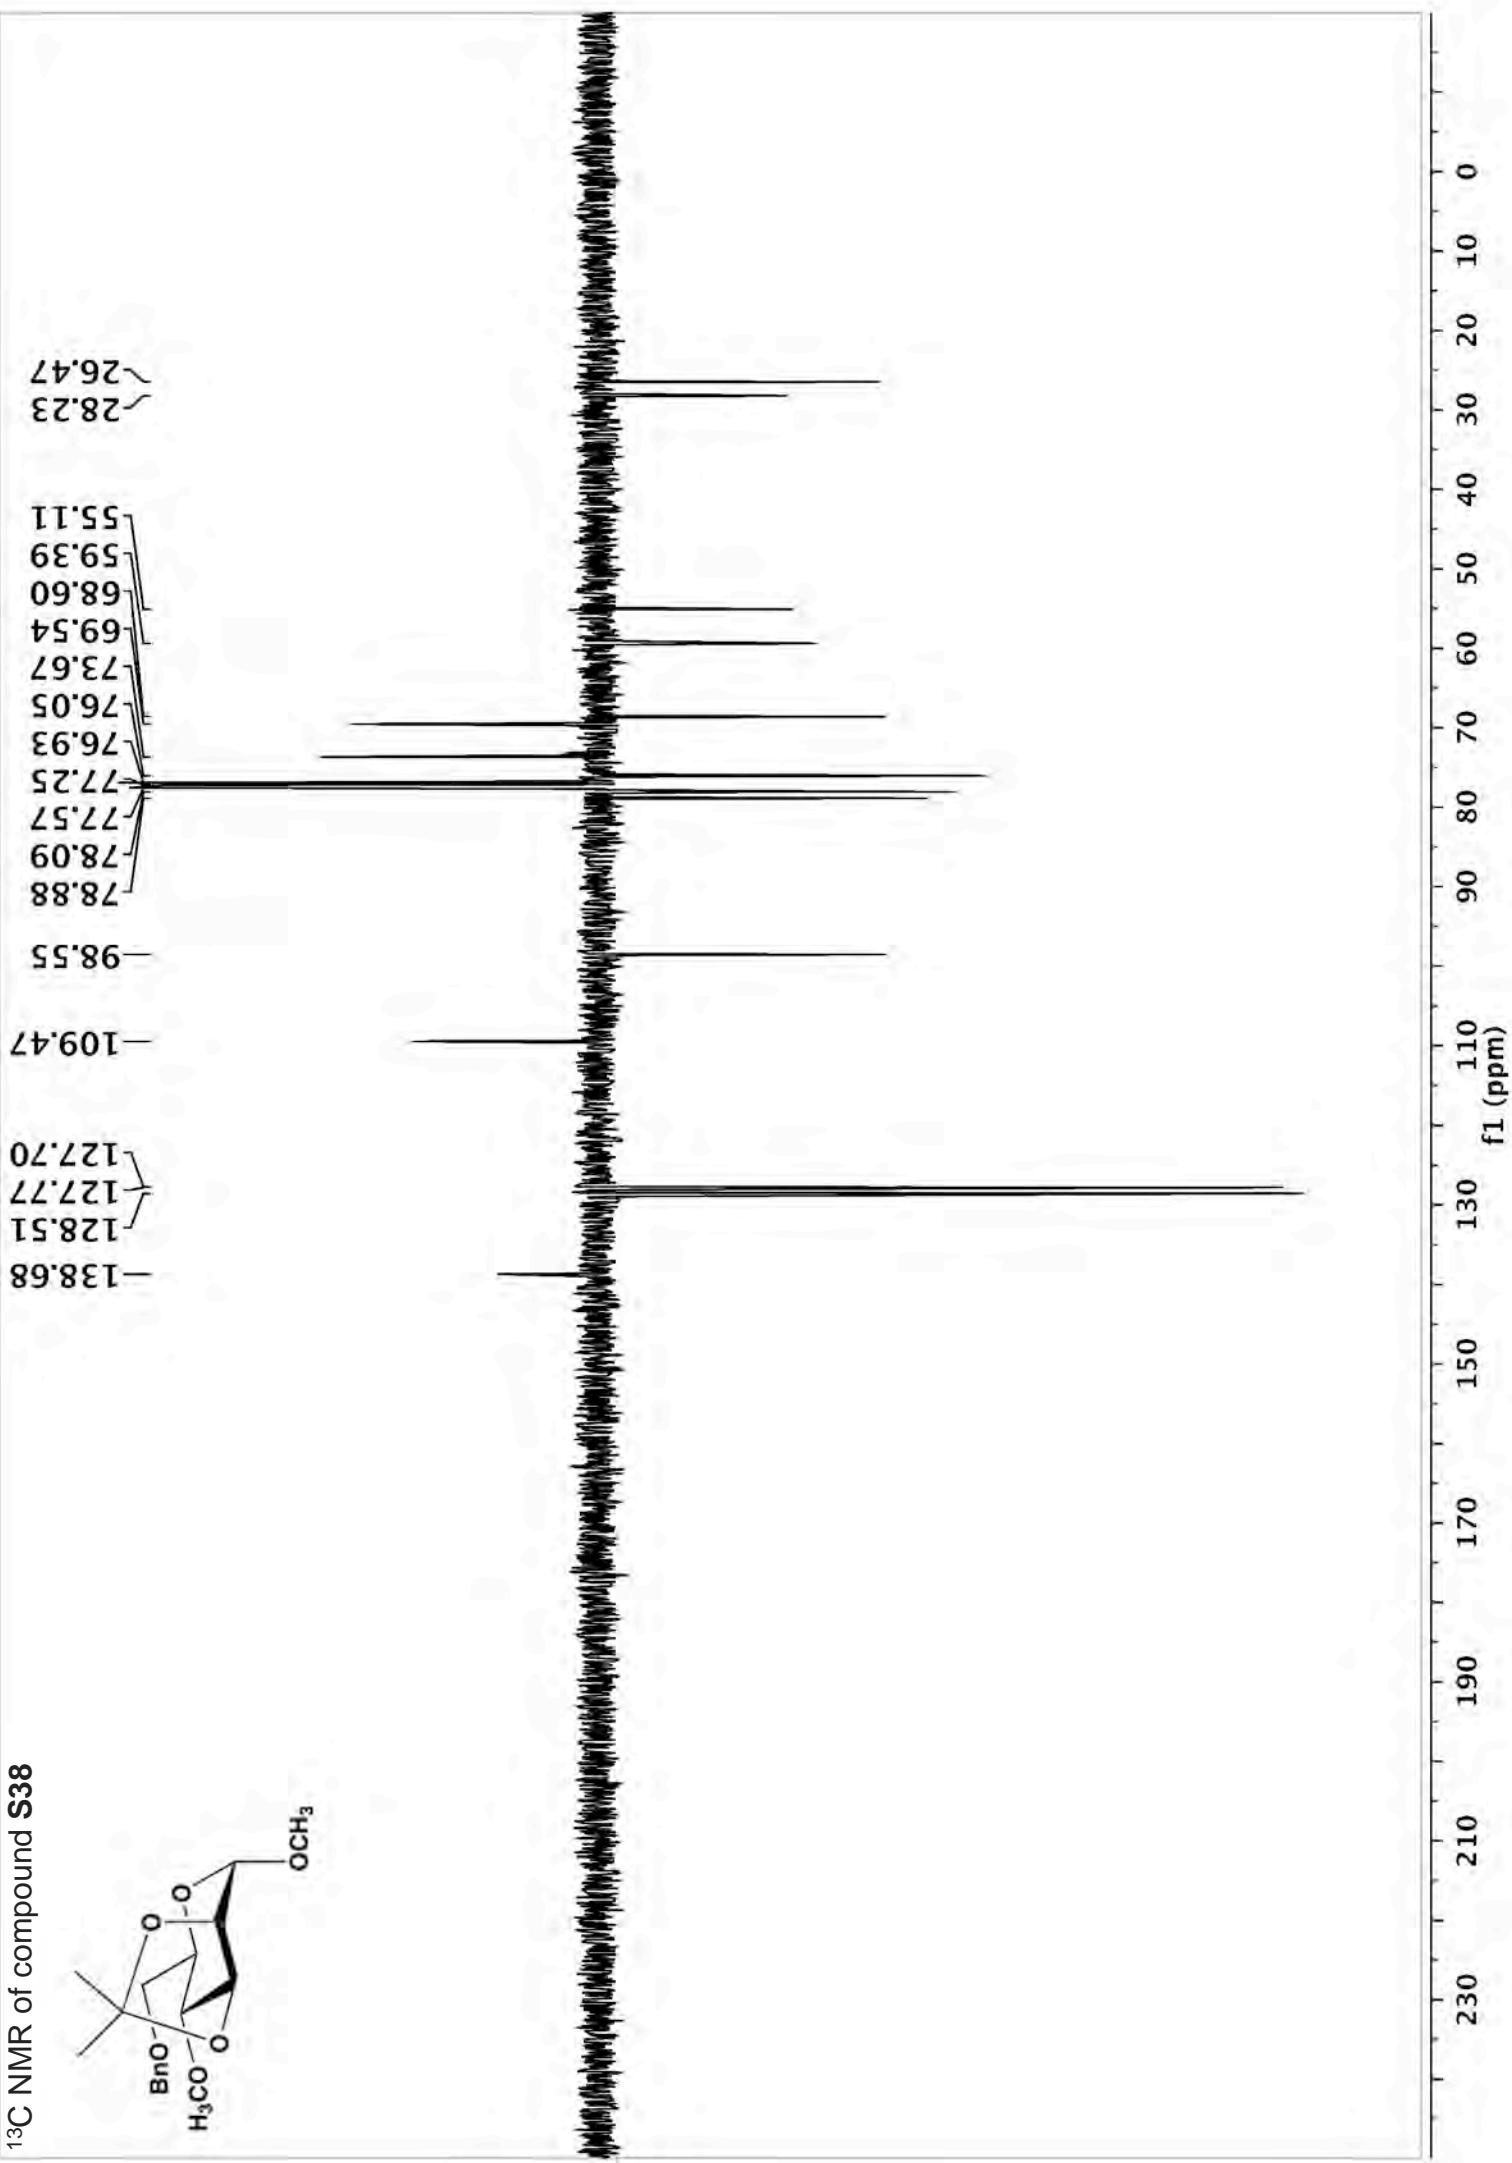



<sup>1</sup>H NMR of compound S38

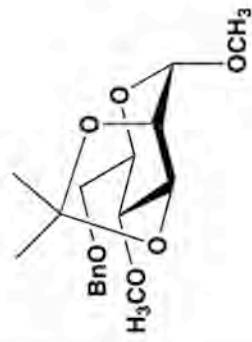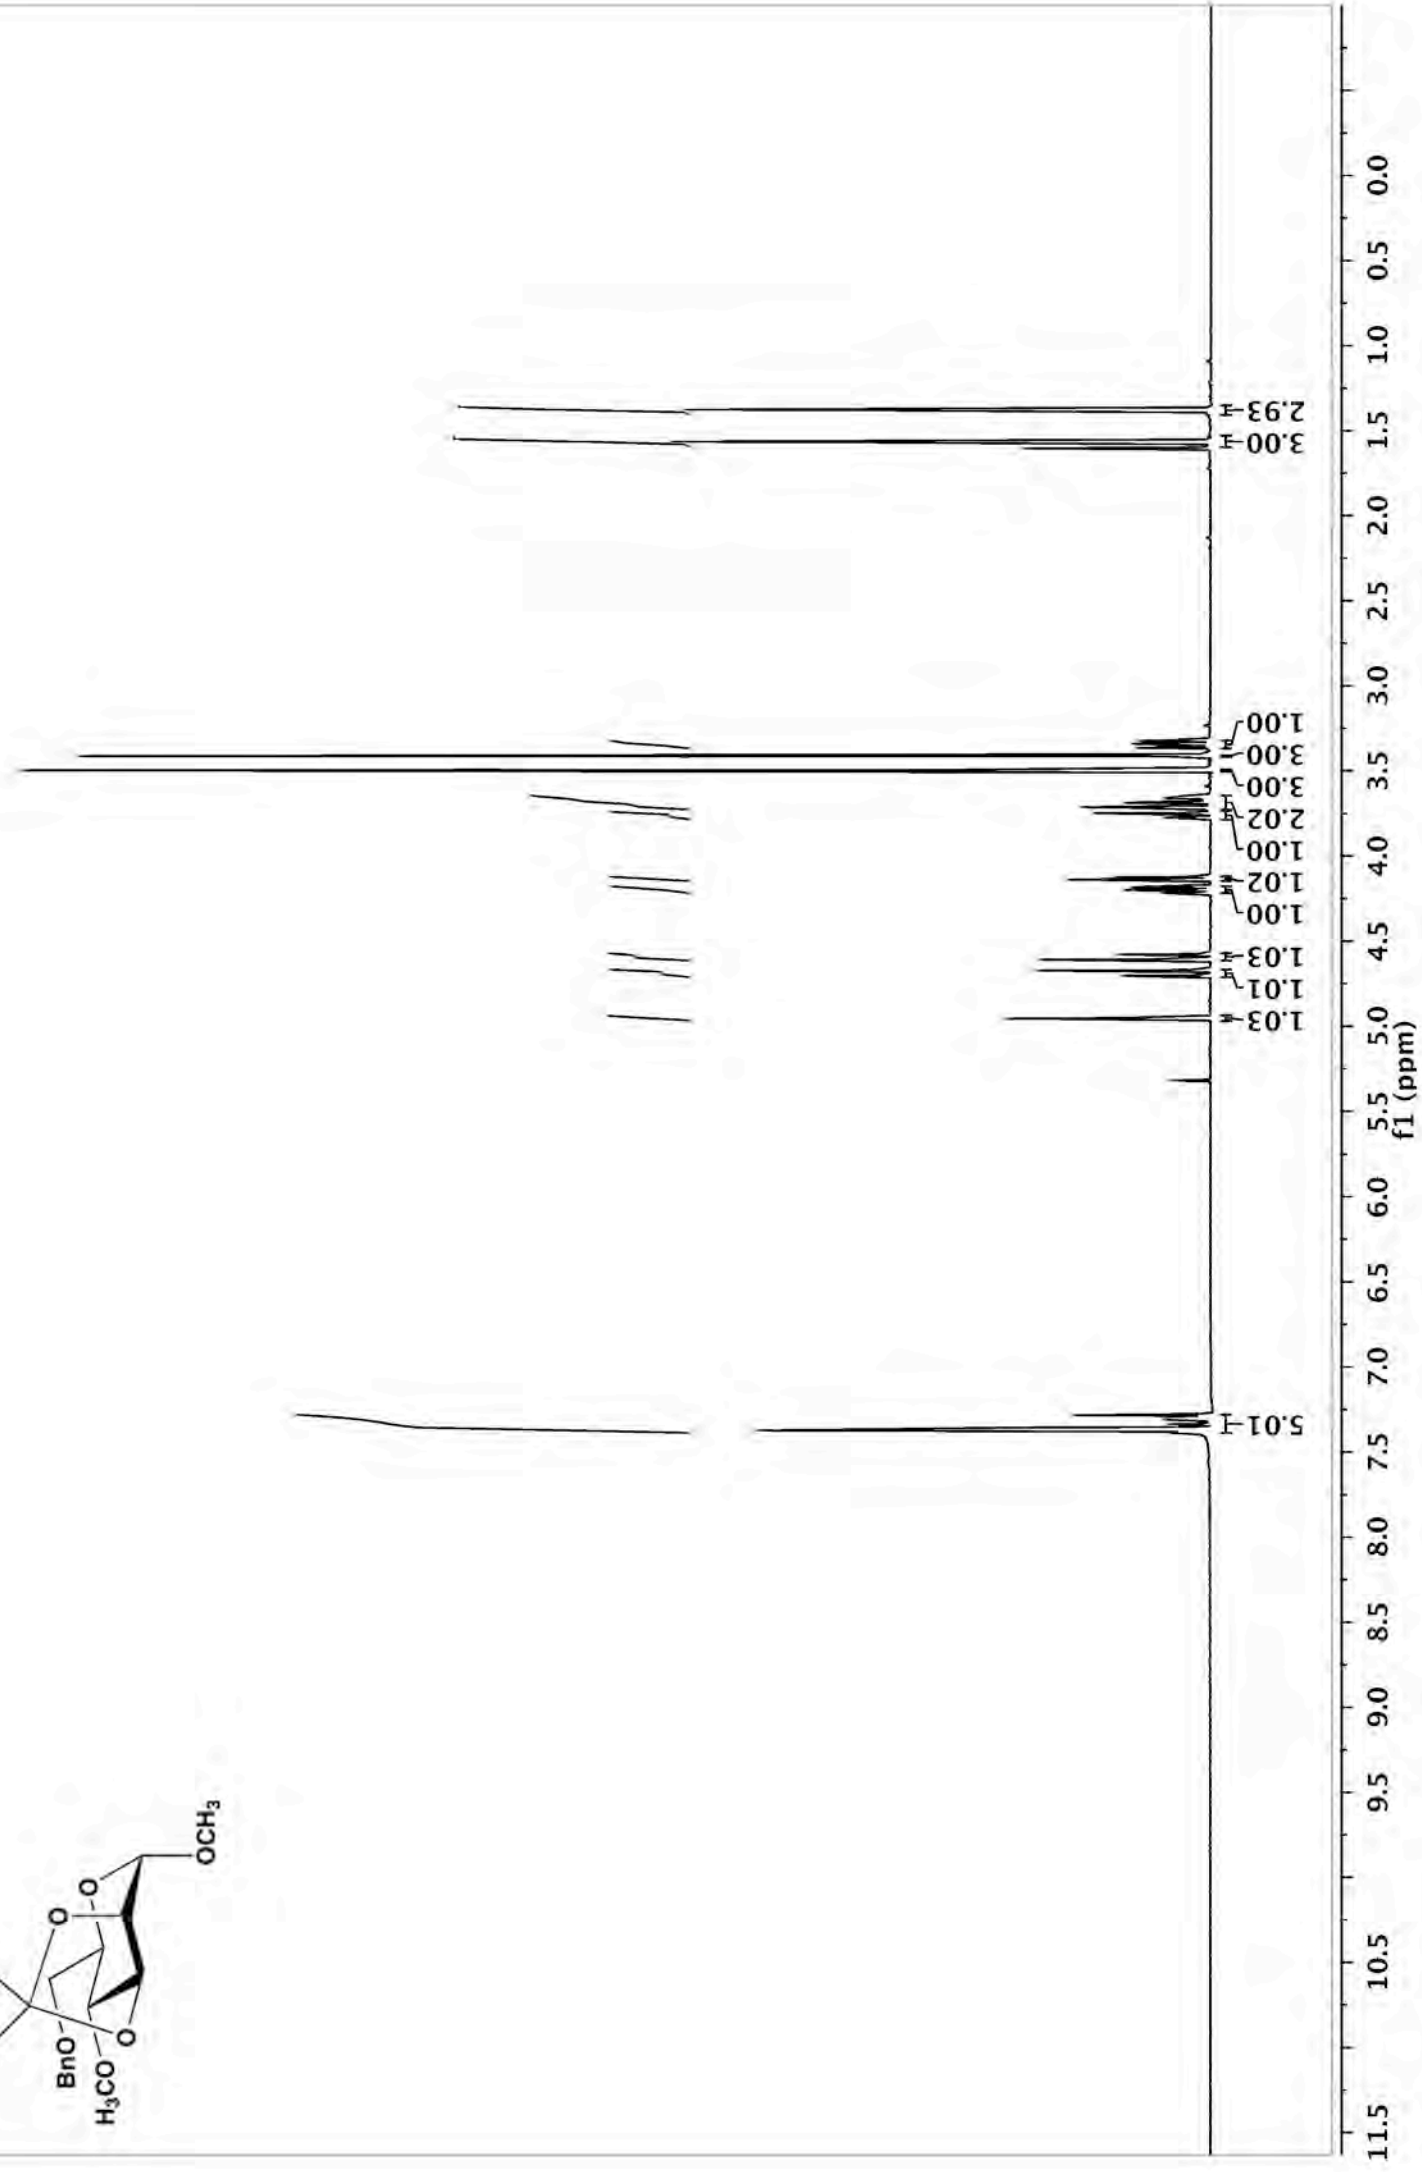



<sup>1</sup>H NMR of compound S39

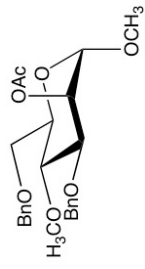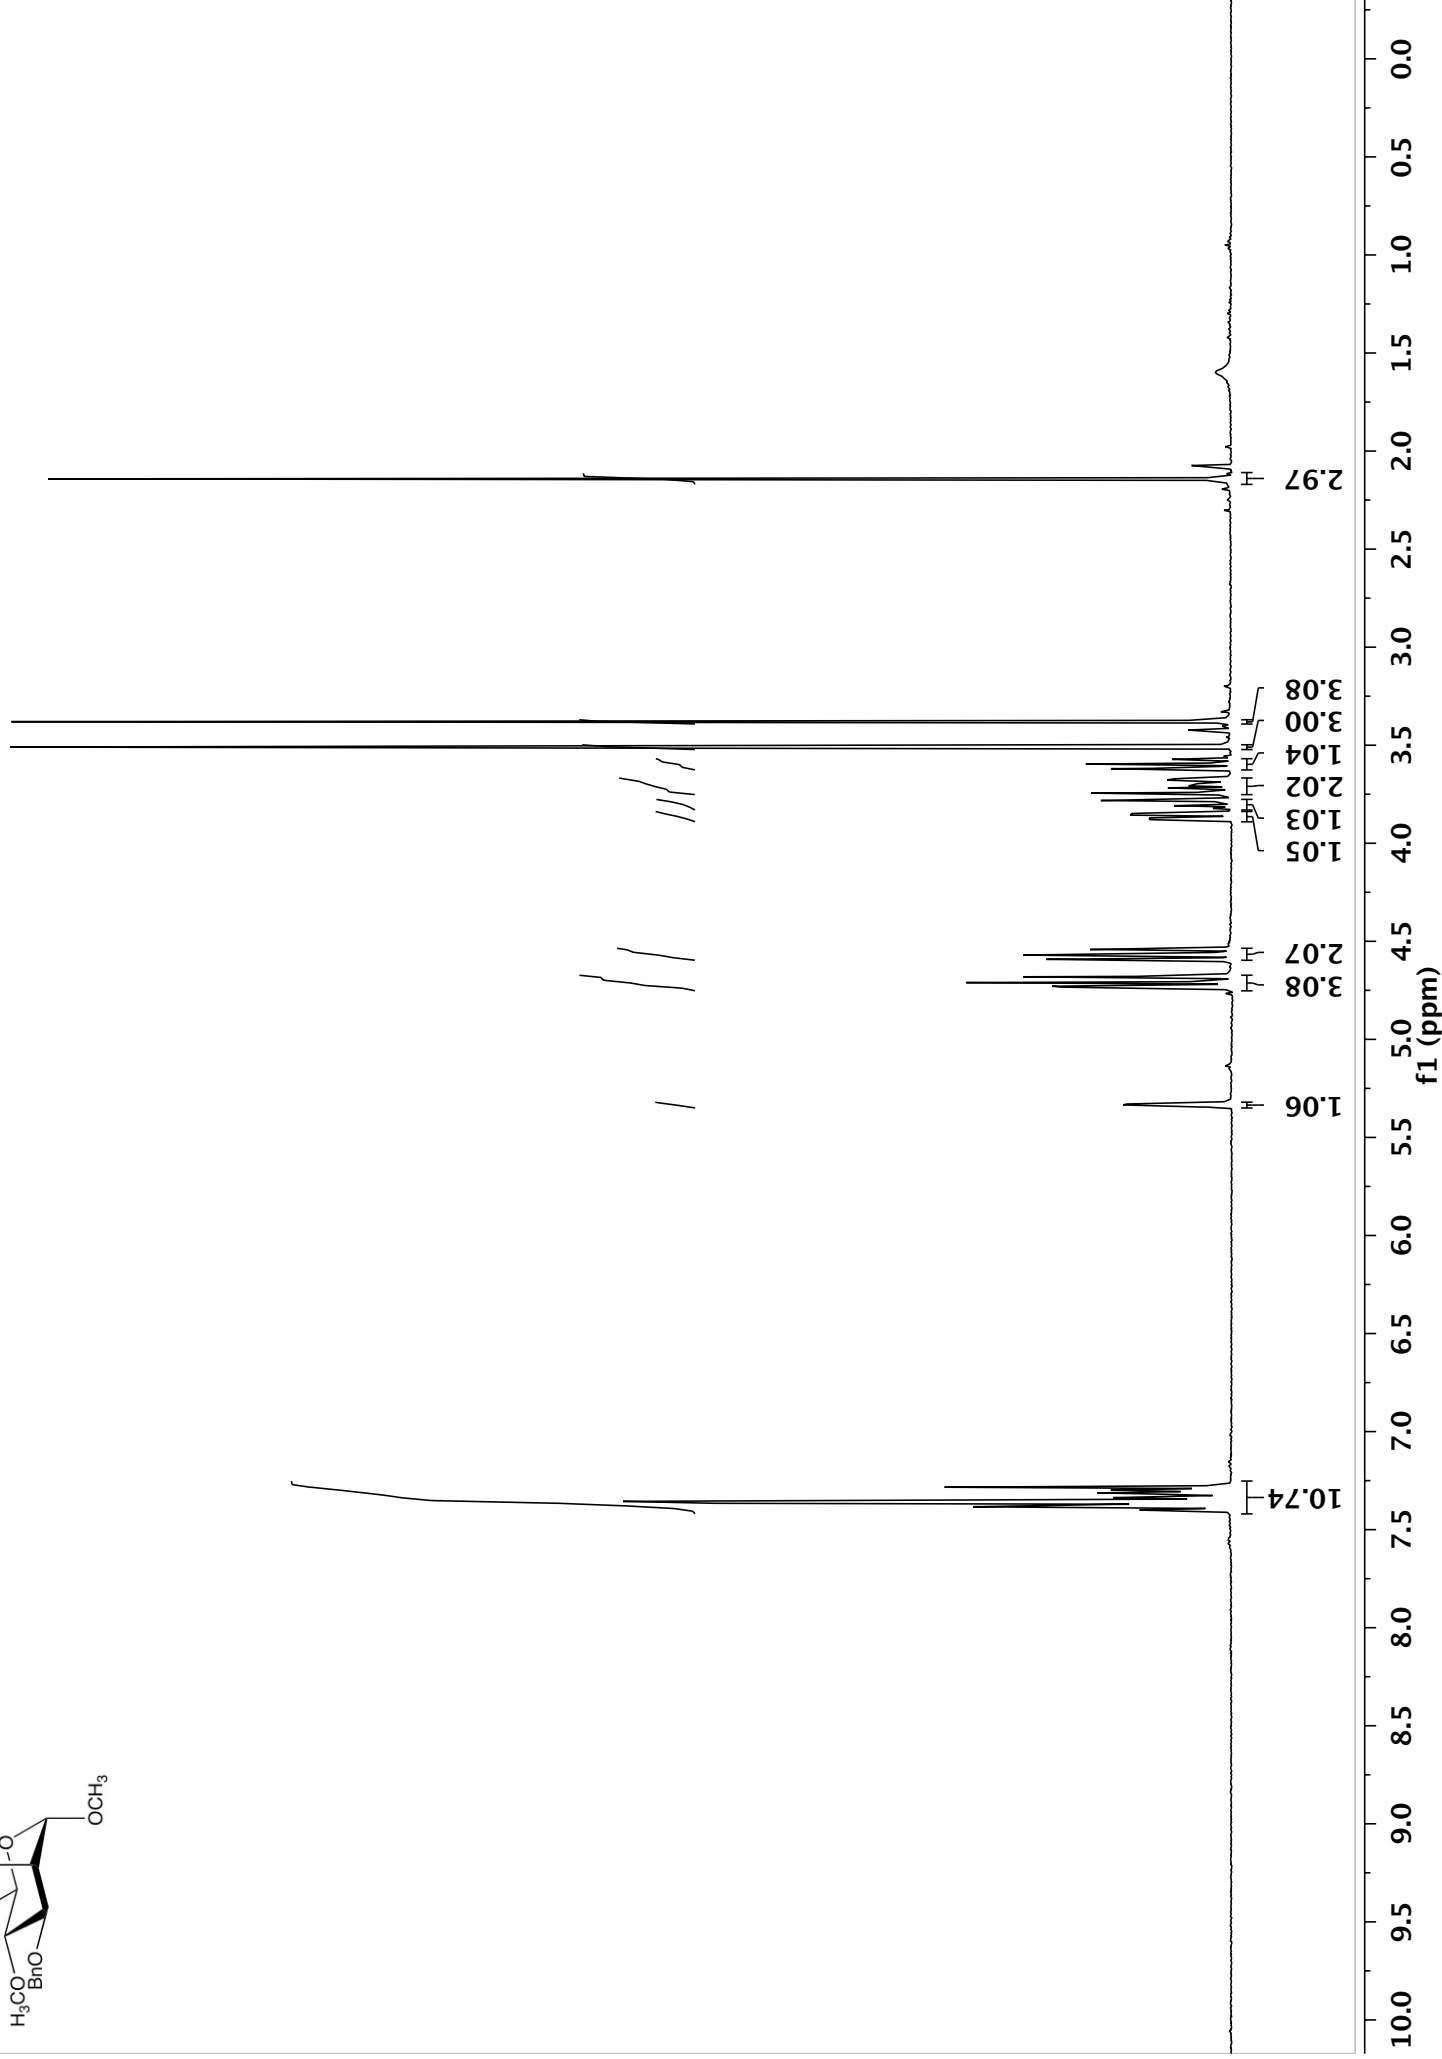

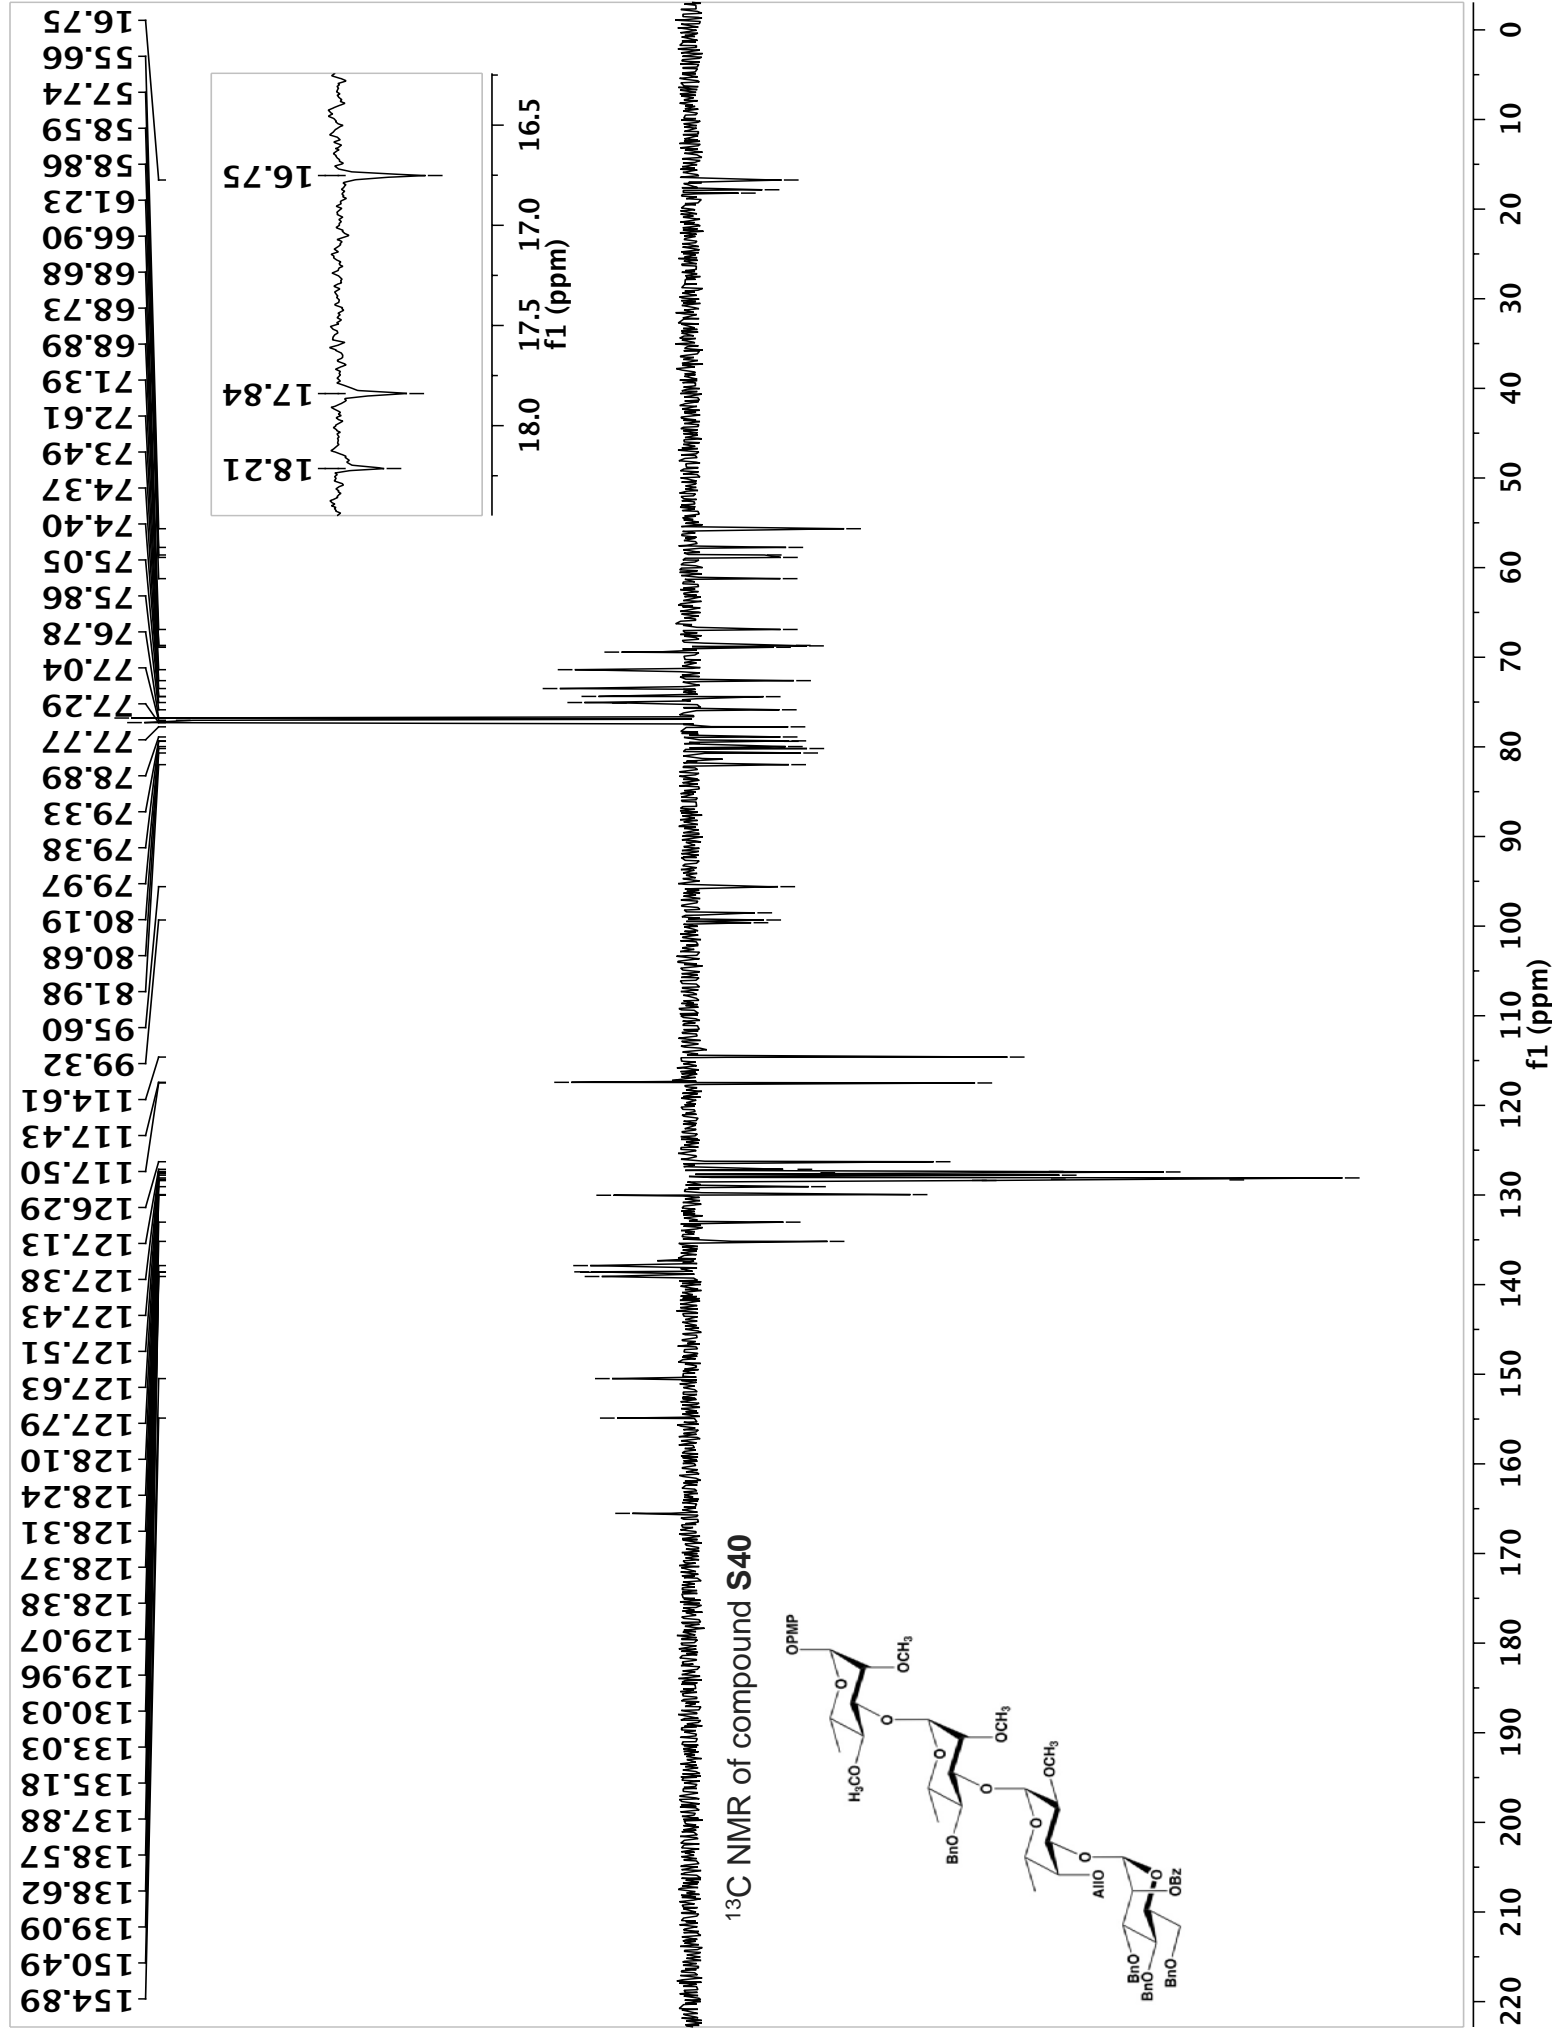

<sup>1</sup>H NMR of compound S40

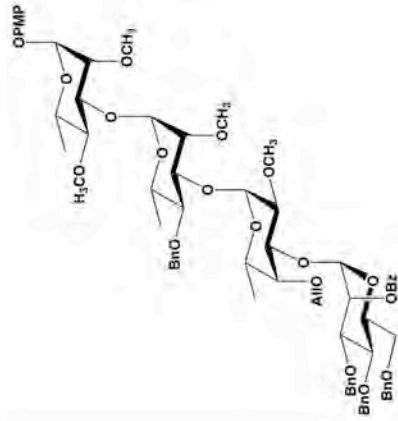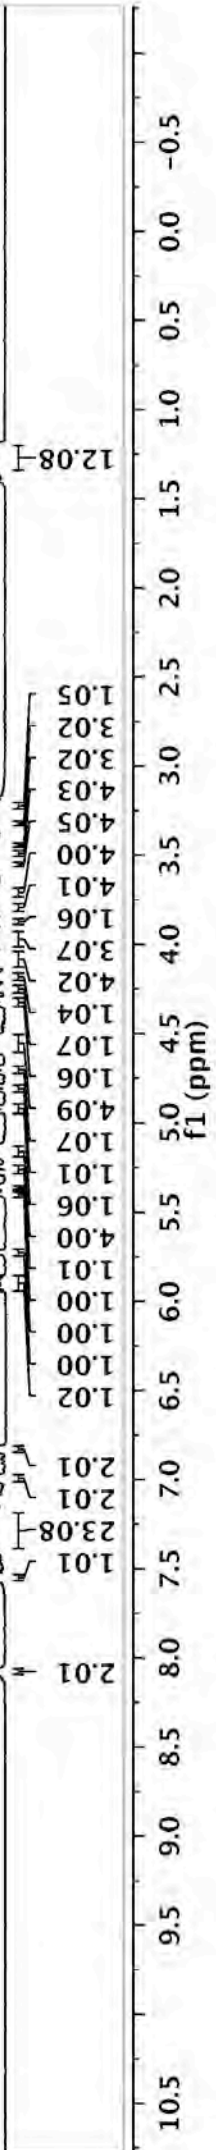

165.50  
150.48  
139.07  
138.62  
138.02  
135.12  
133.27  
129.97  
129.92  
128.37  
128.33  
128.30  
128.27  
128.08  
128.04  
127.91  
127.57  
127.42  
127.33  
126.28  
117.49  
117.36  
114.60  
99.68  
95.59  
81.97  
80.67  
80.17  
79.94  
79.49  
79.37  
78.88  
77.55  
77.27  
77.02  
76.76  
75.90  
74.39  
73.87  
73.51  
72.65  
71.37  
70.08  
68.93  
68.72  
68.66  
66.87  
61.22  
61.02  
58.85  
58.60  
57.74  
55.65  
18.20  
17.83  
16.72

<sup>13</sup>C NMR of compound S41

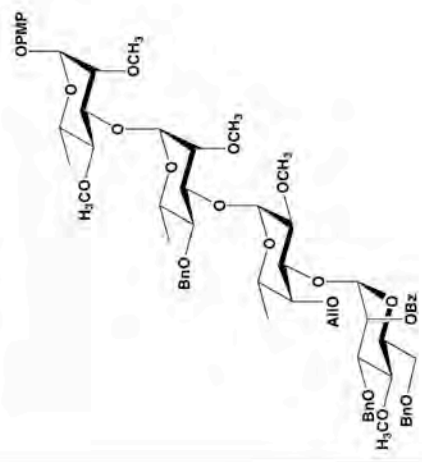

f1 (ppm)

<sup>1</sup>H NMR of compound S41

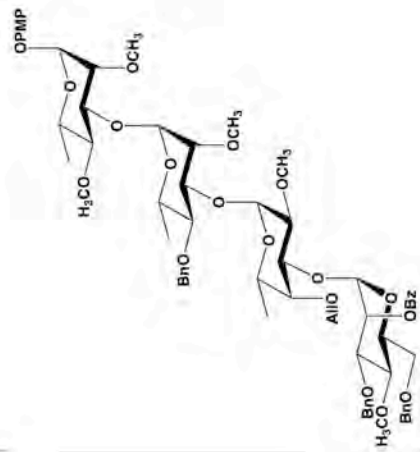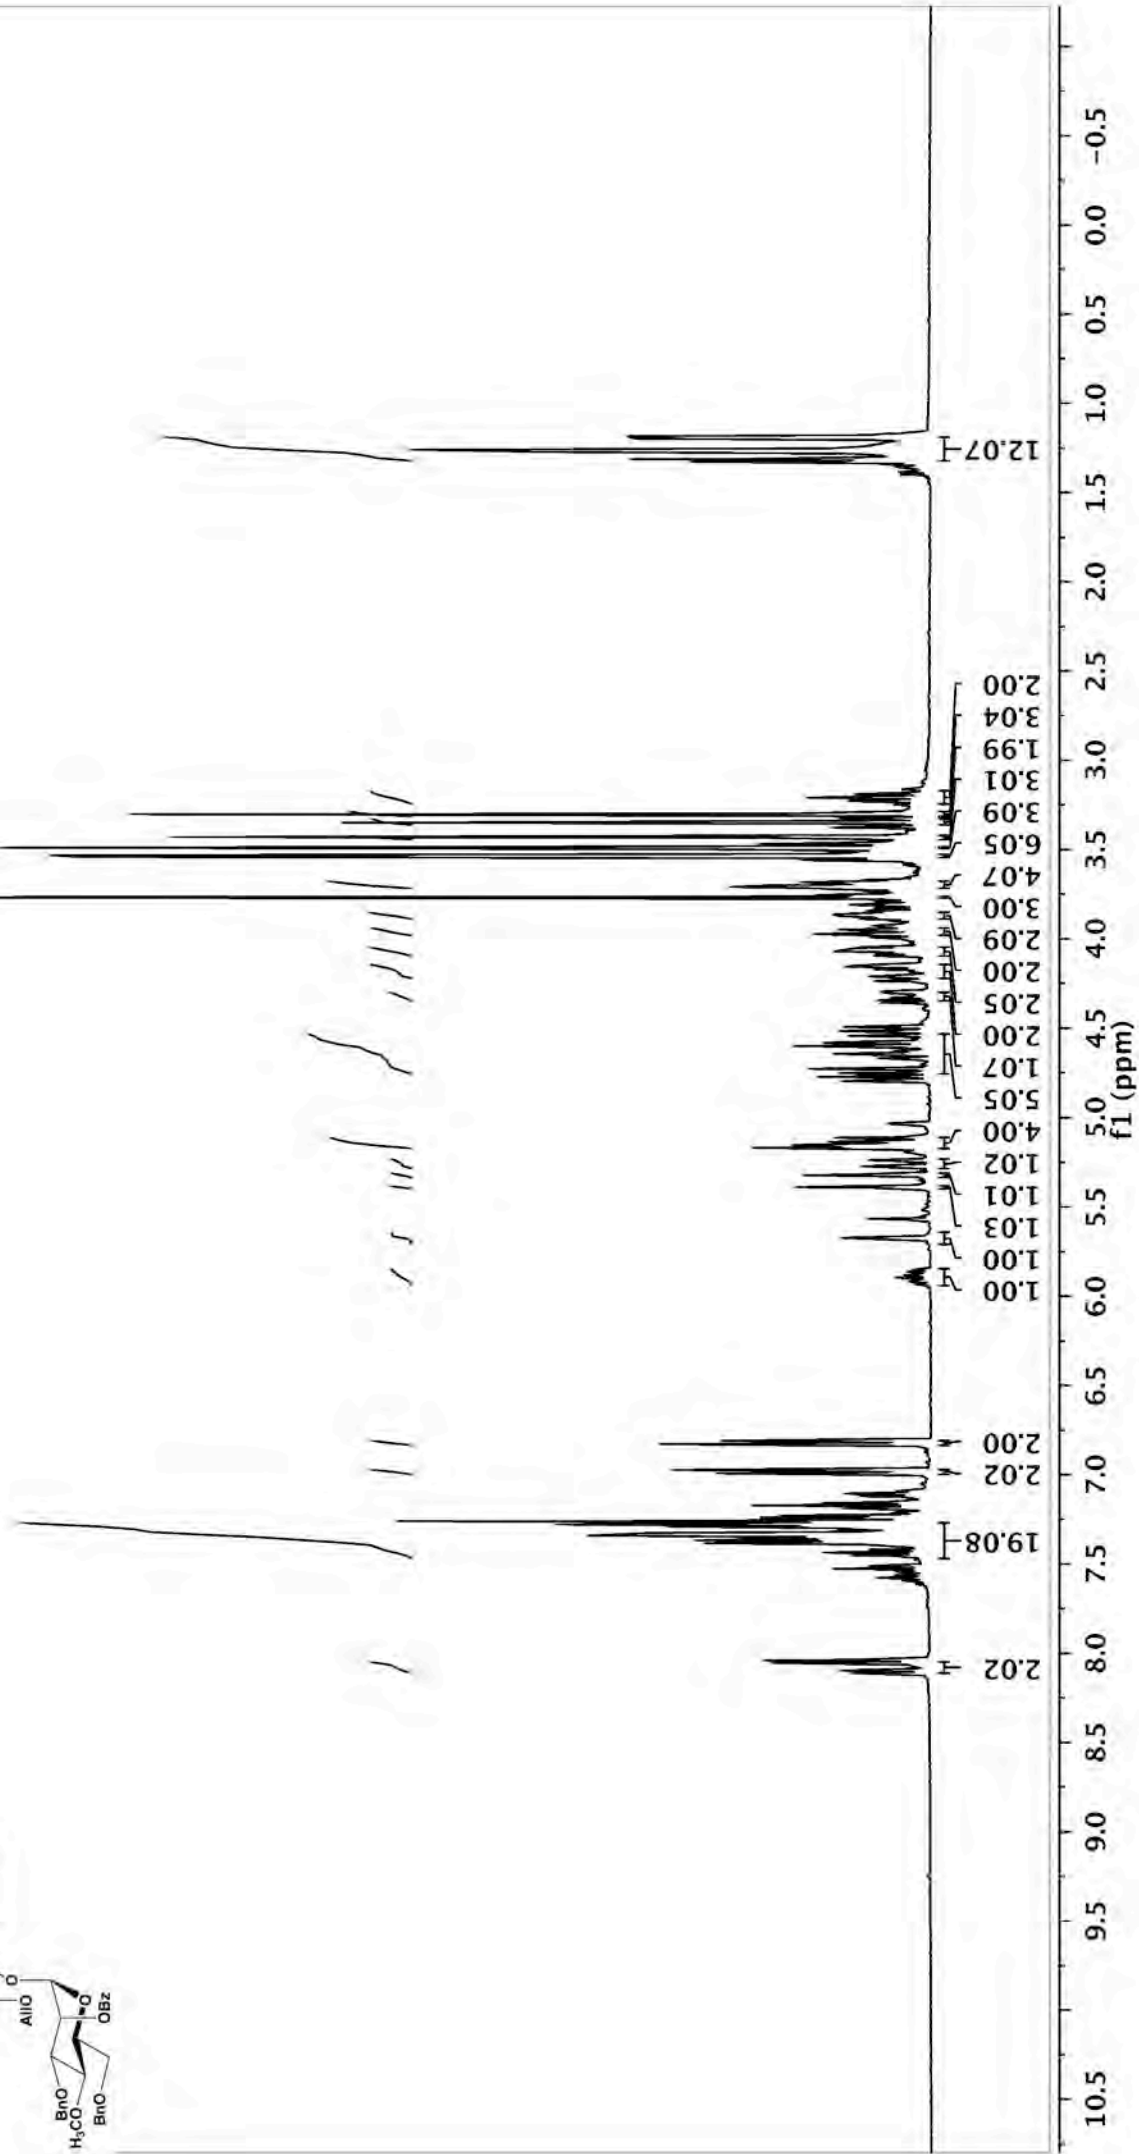

<sup>13</sup>C NMR of compound S42

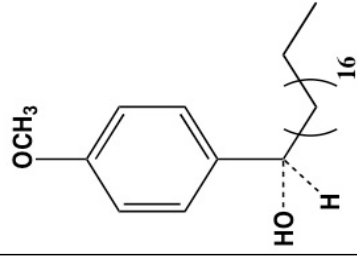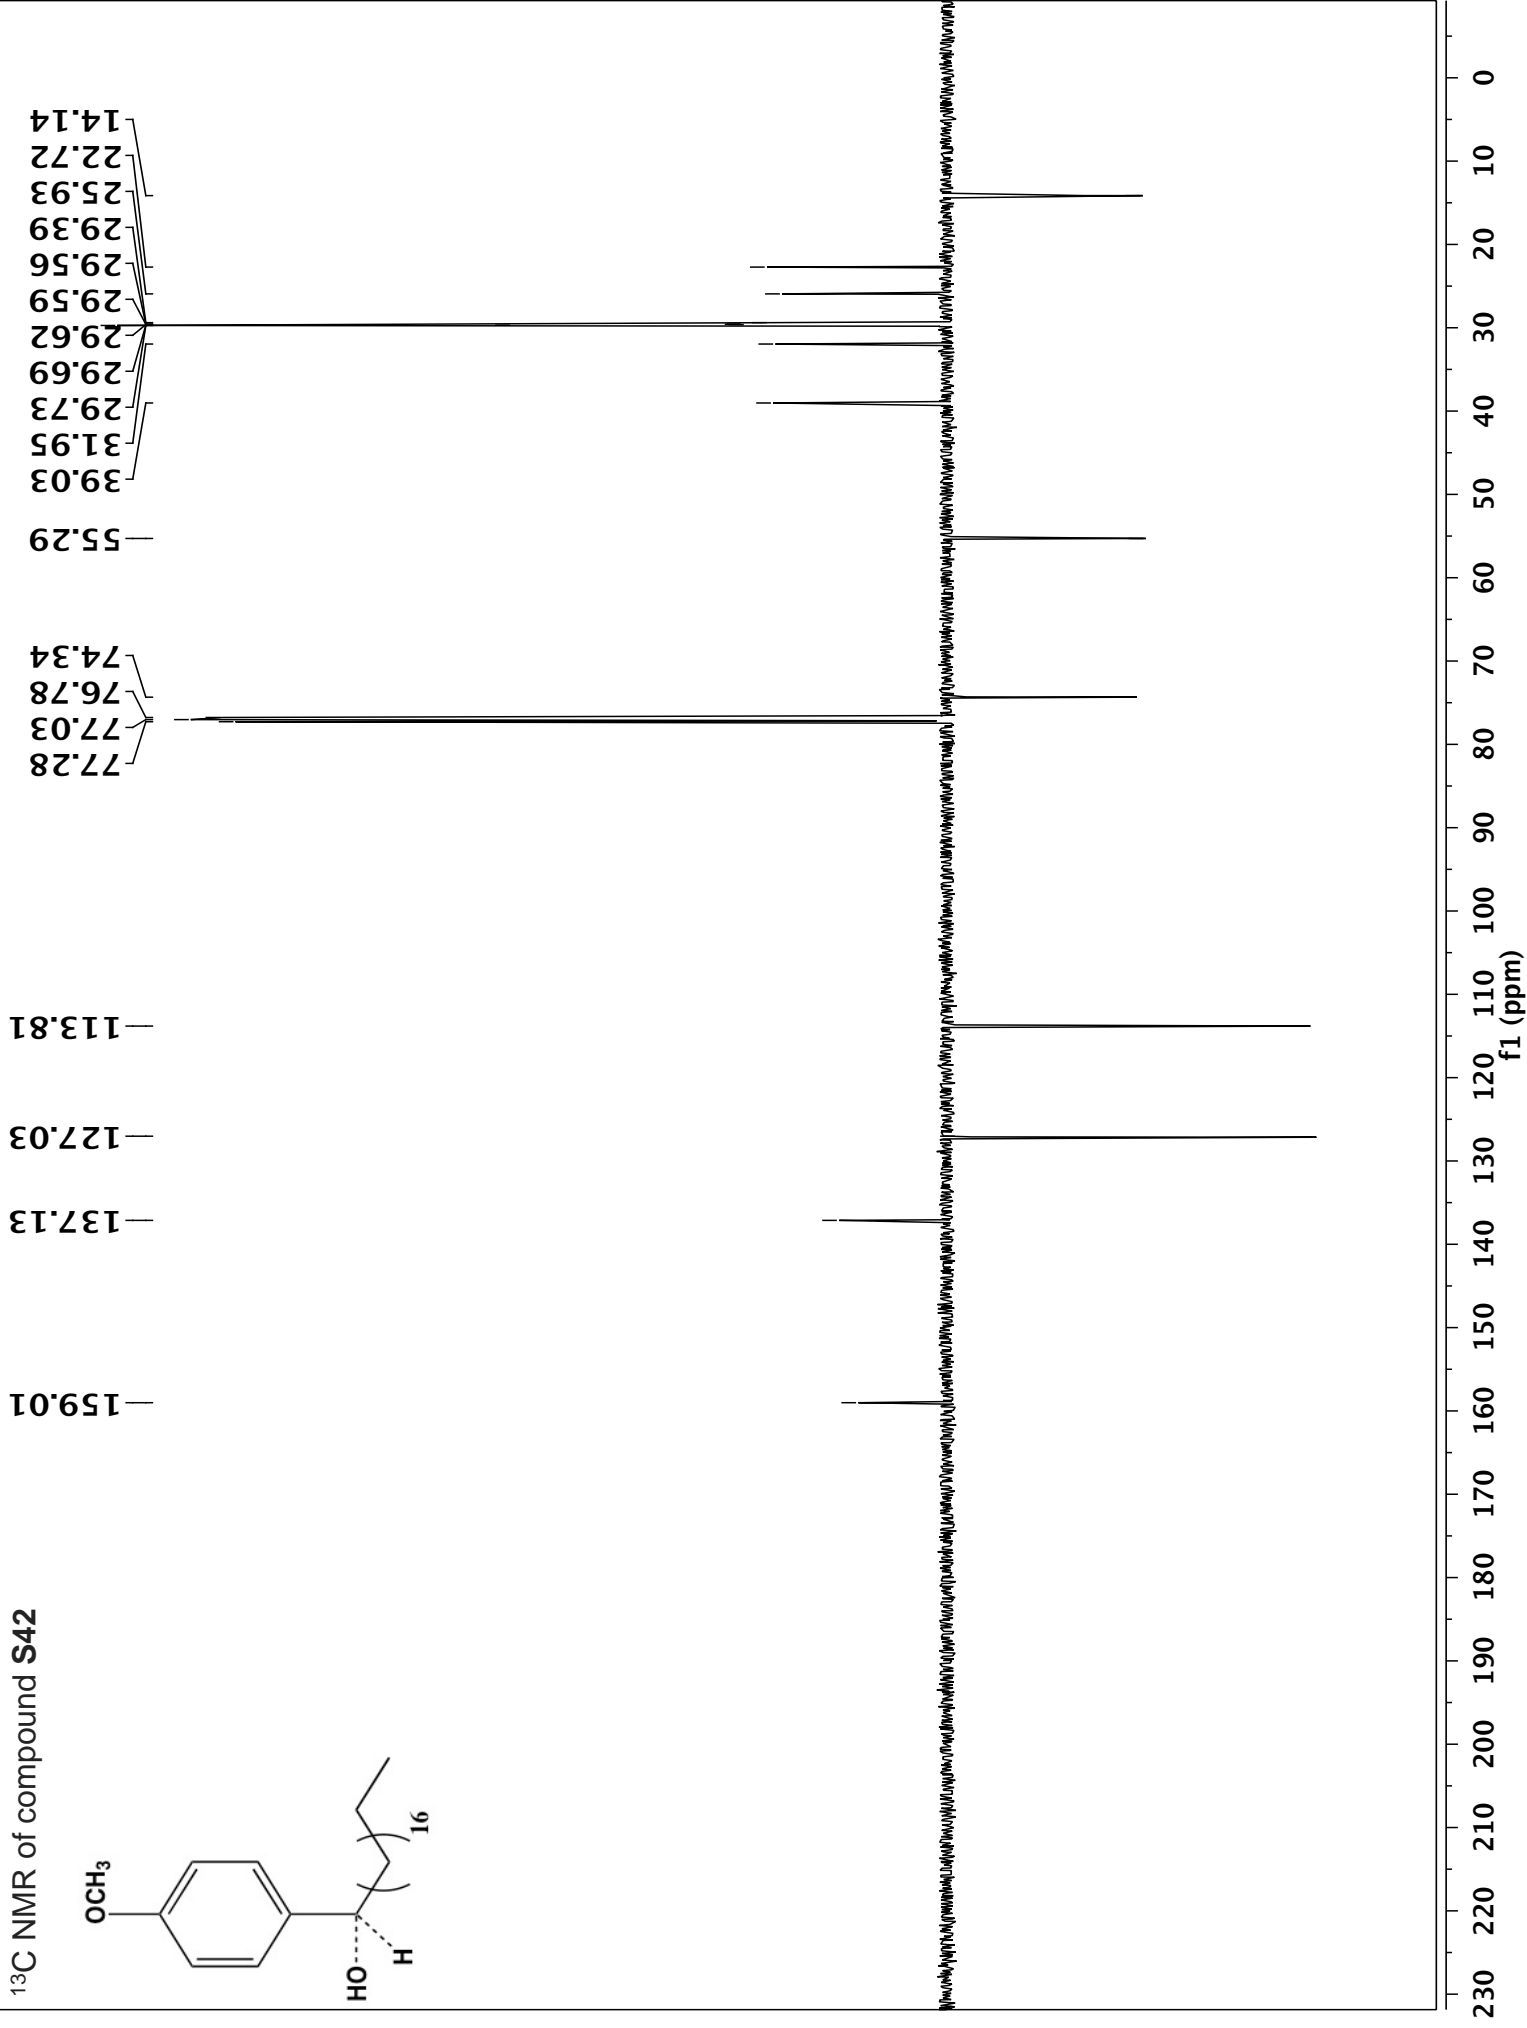



<sup>1</sup>H NMR of compound S42

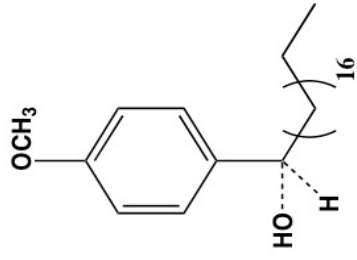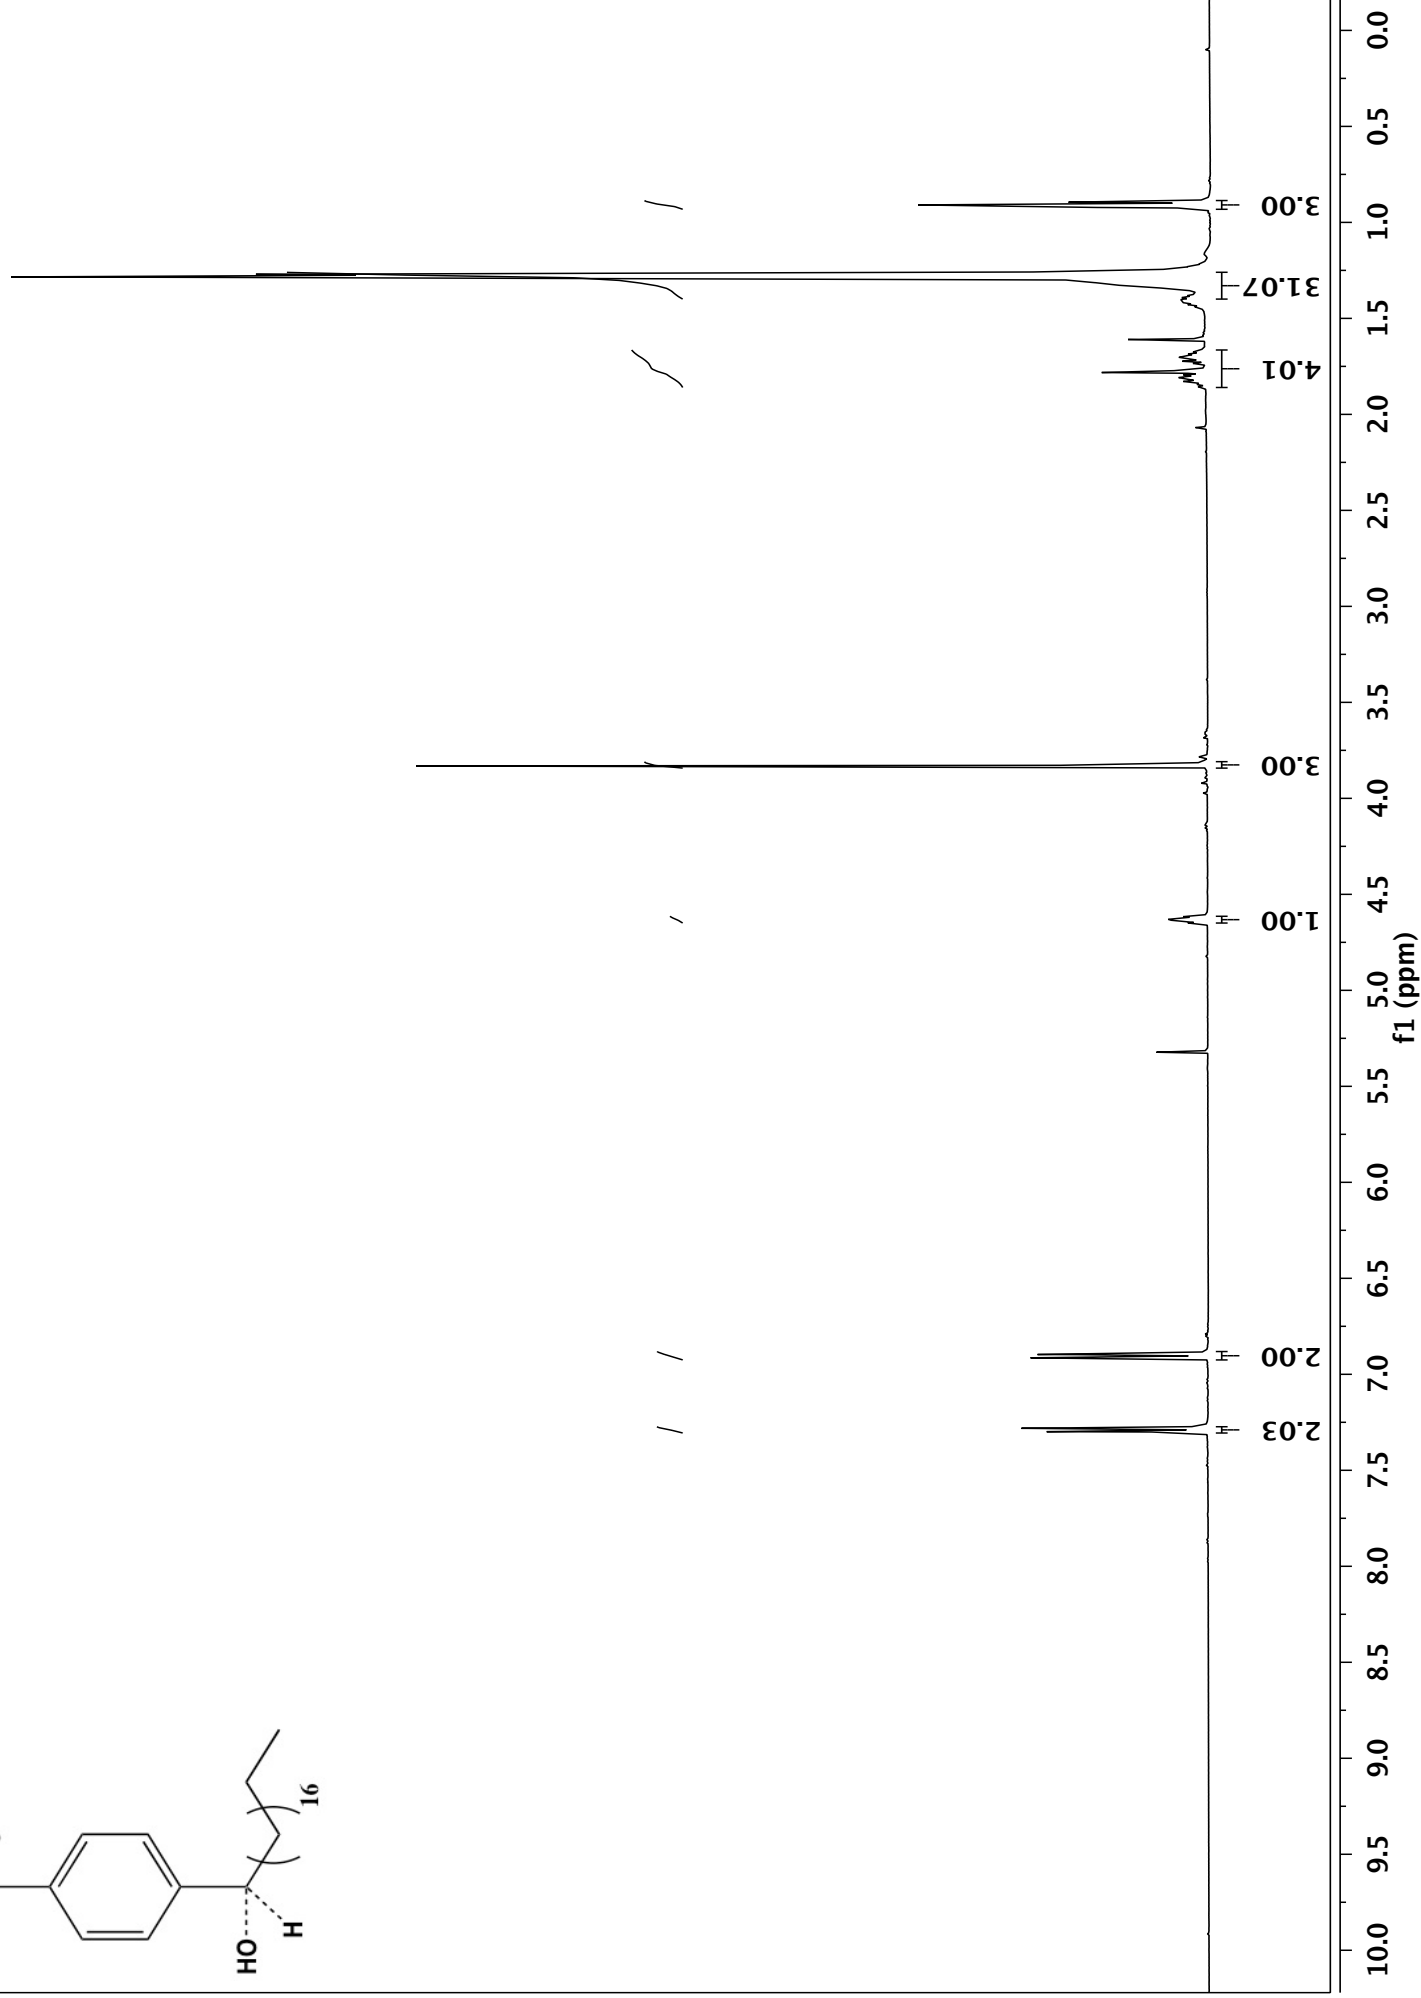

<sup>13</sup>C NMR of compound S43

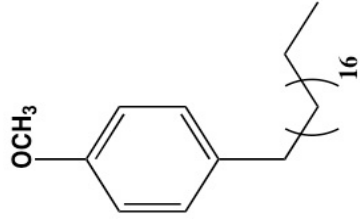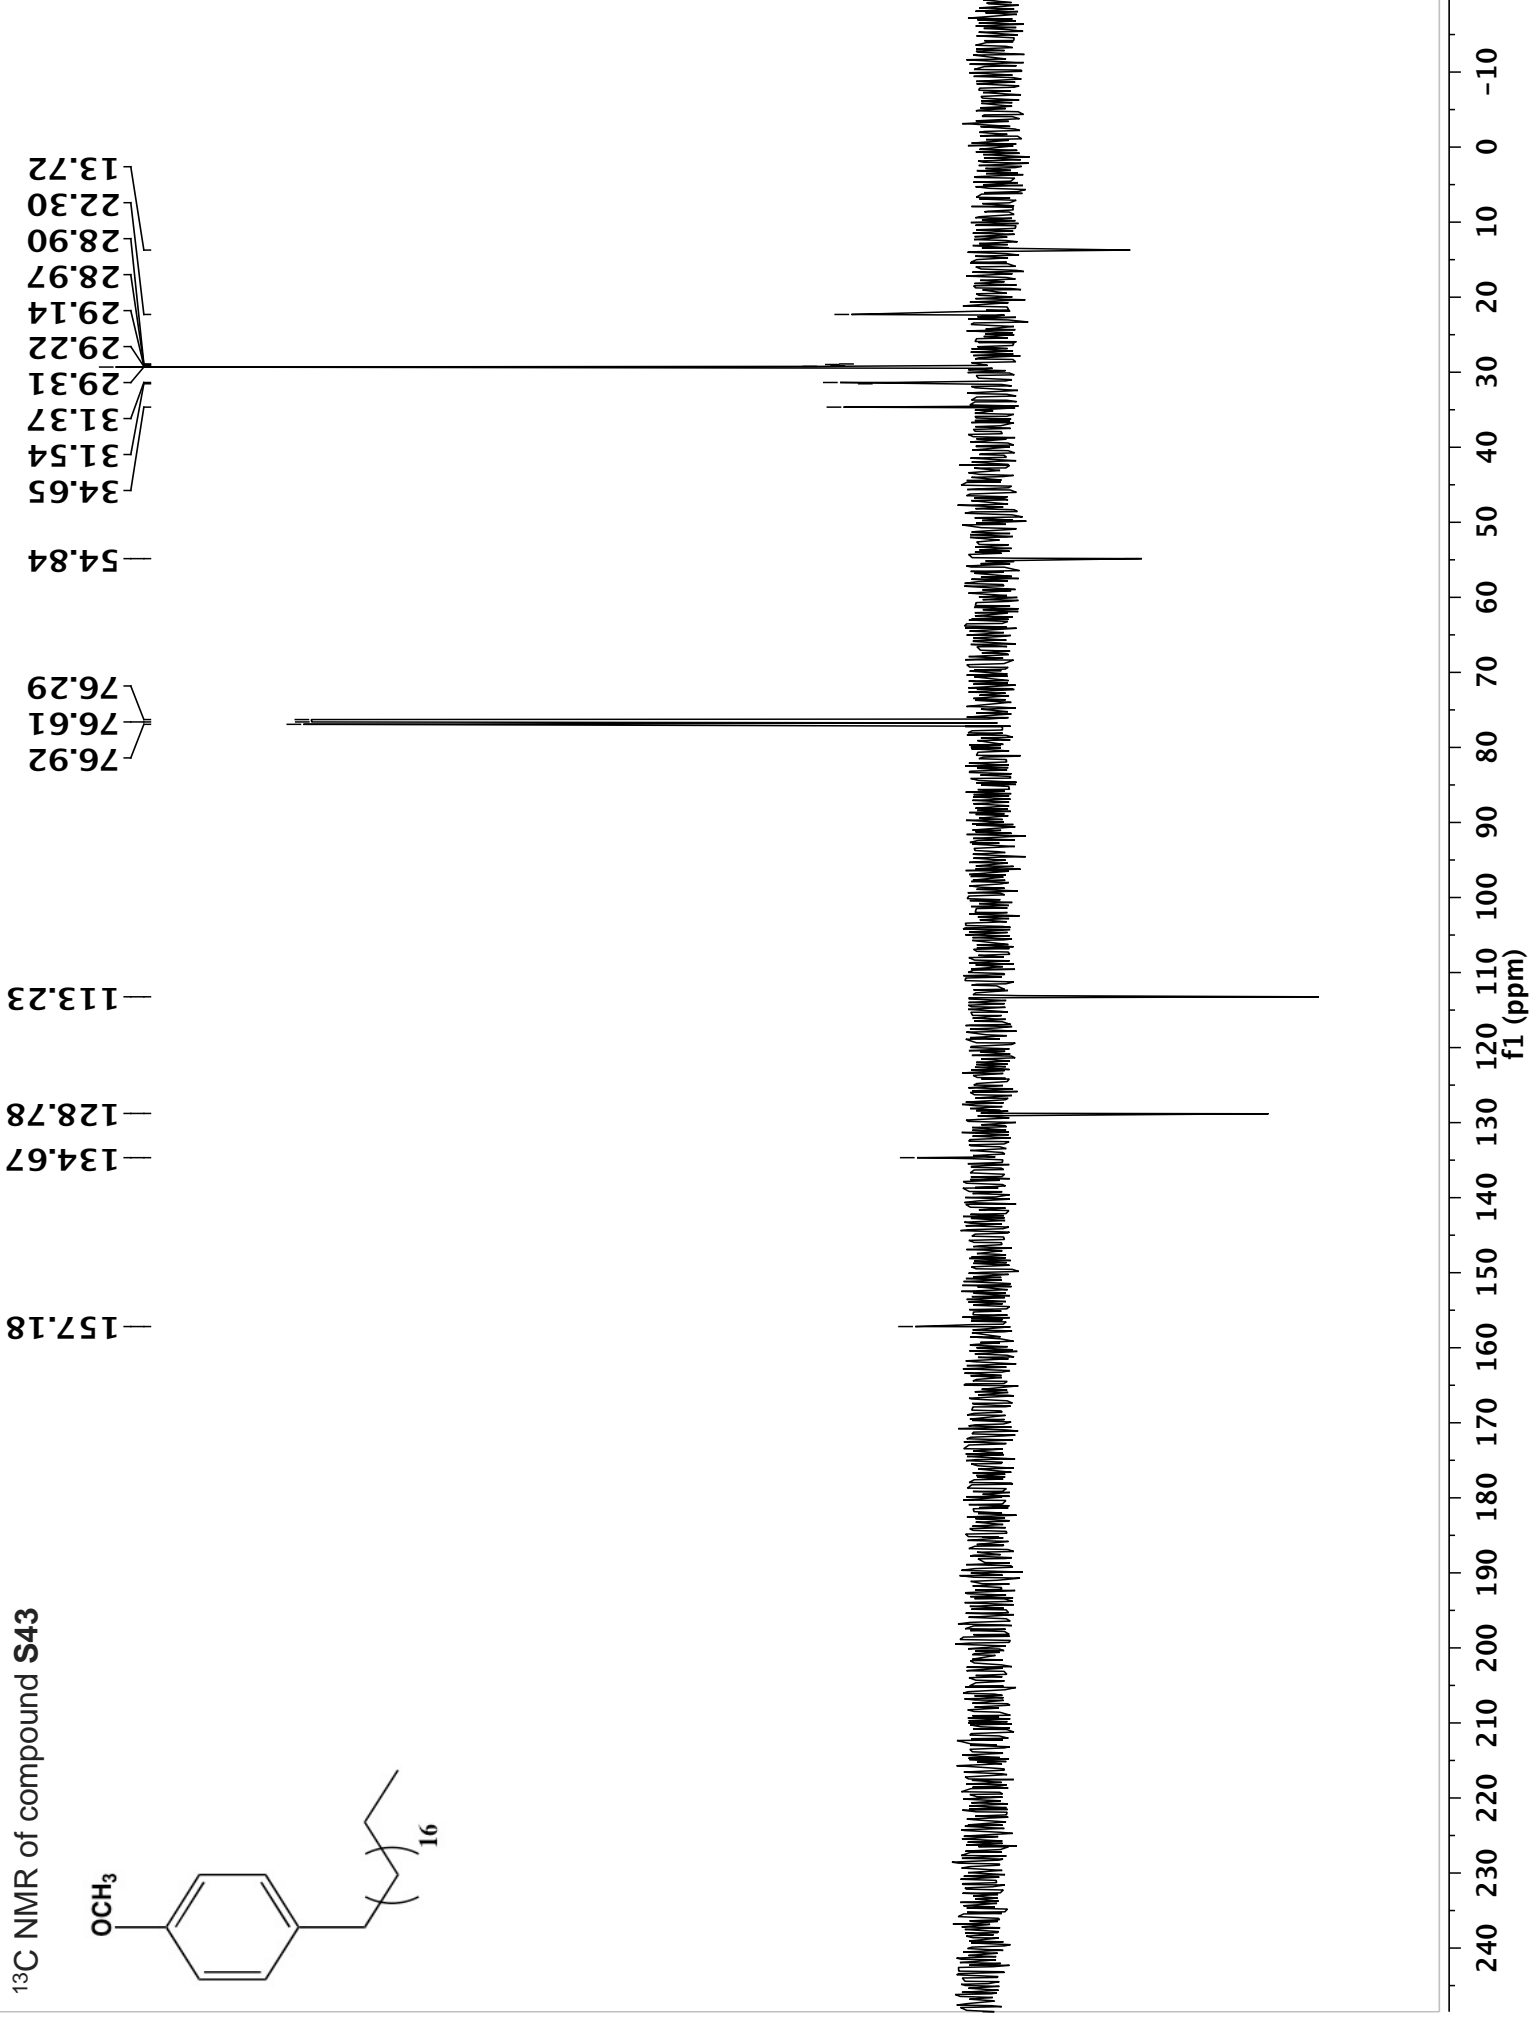

<sup>1</sup>H NMR of compound S43

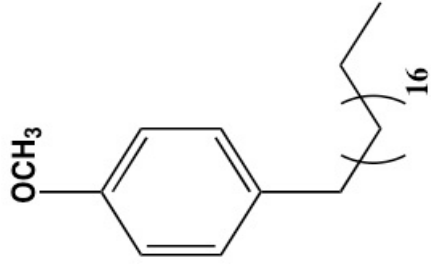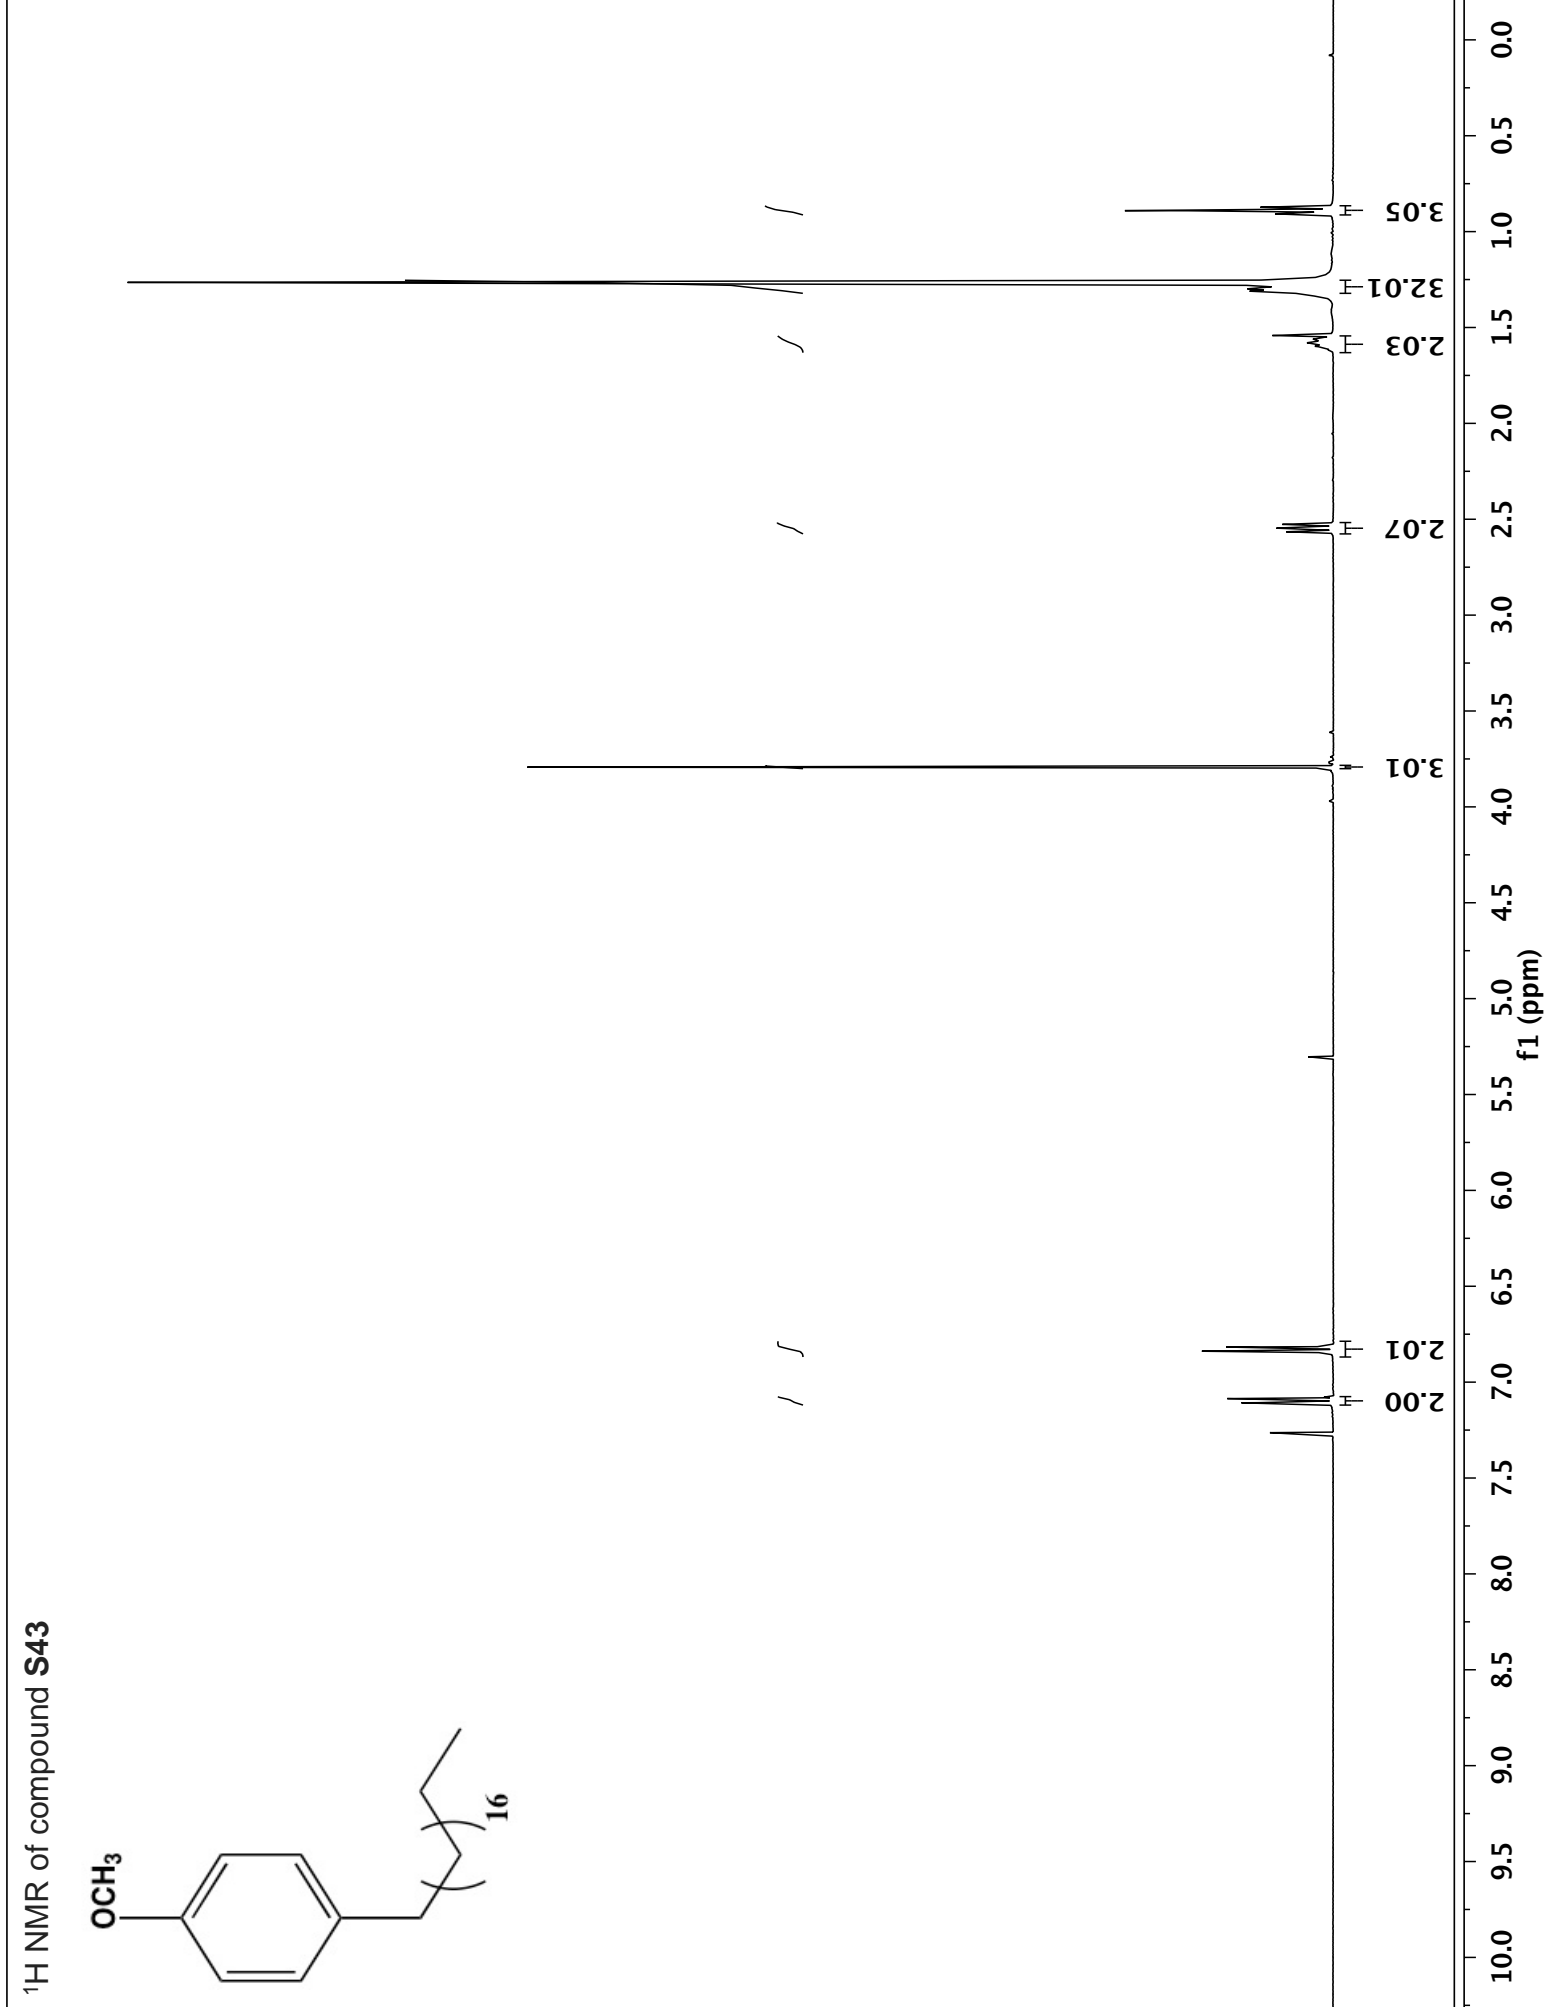

<sup>1</sup>H NMR of compound S44

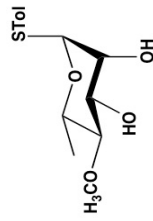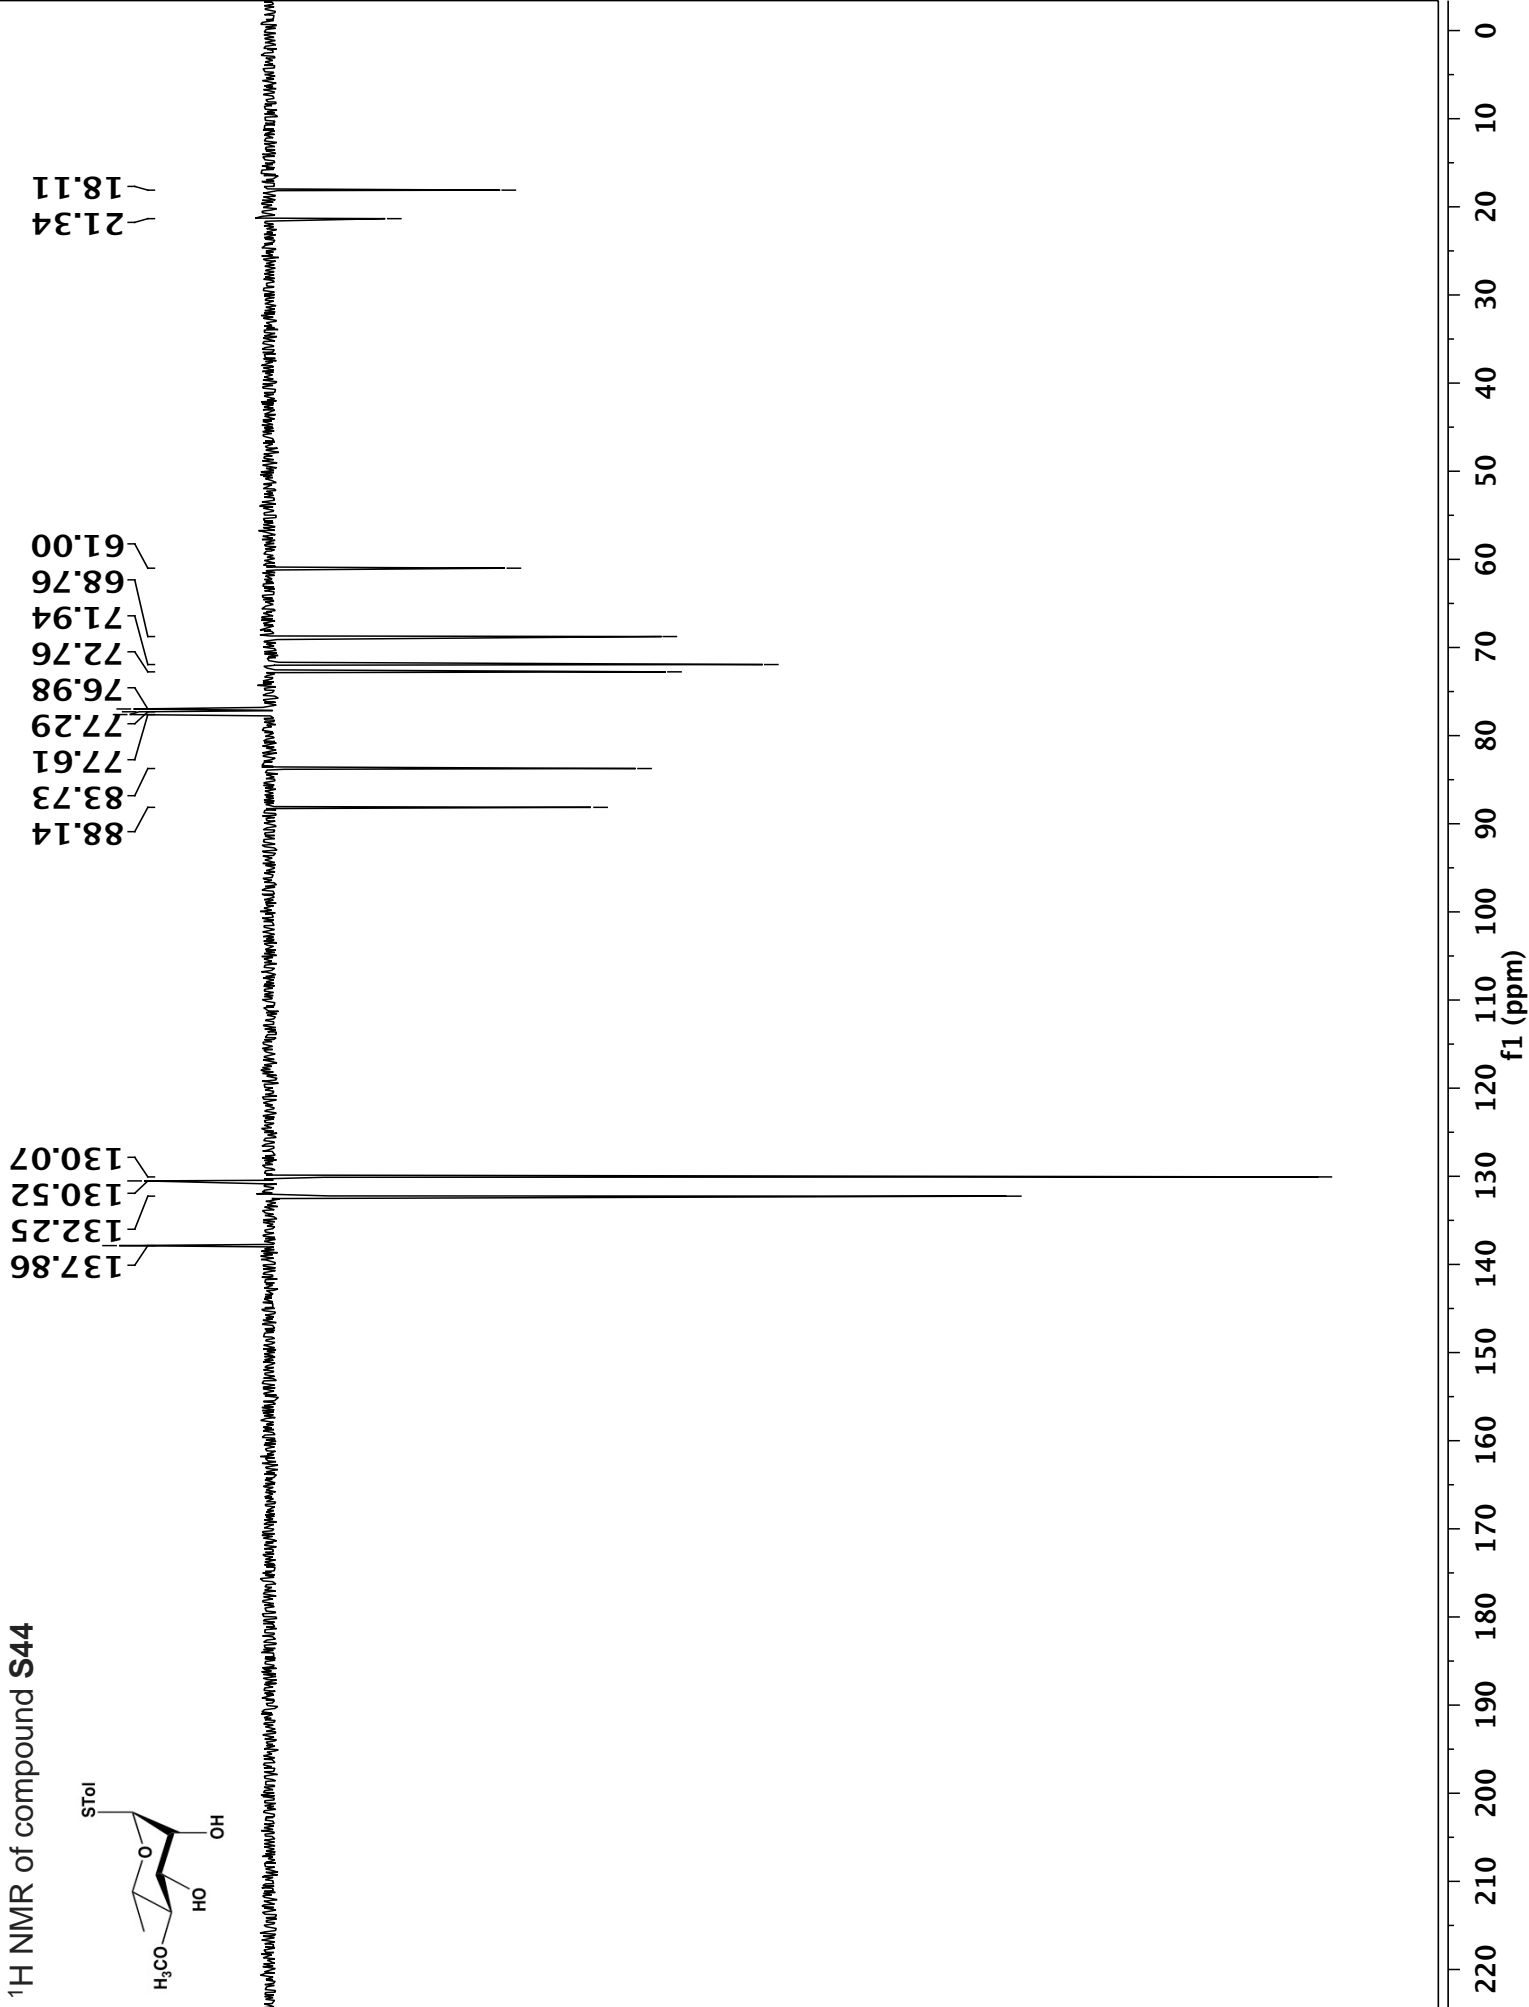

<sup>1</sup>H NMR of compound S44

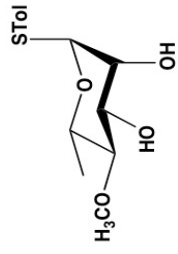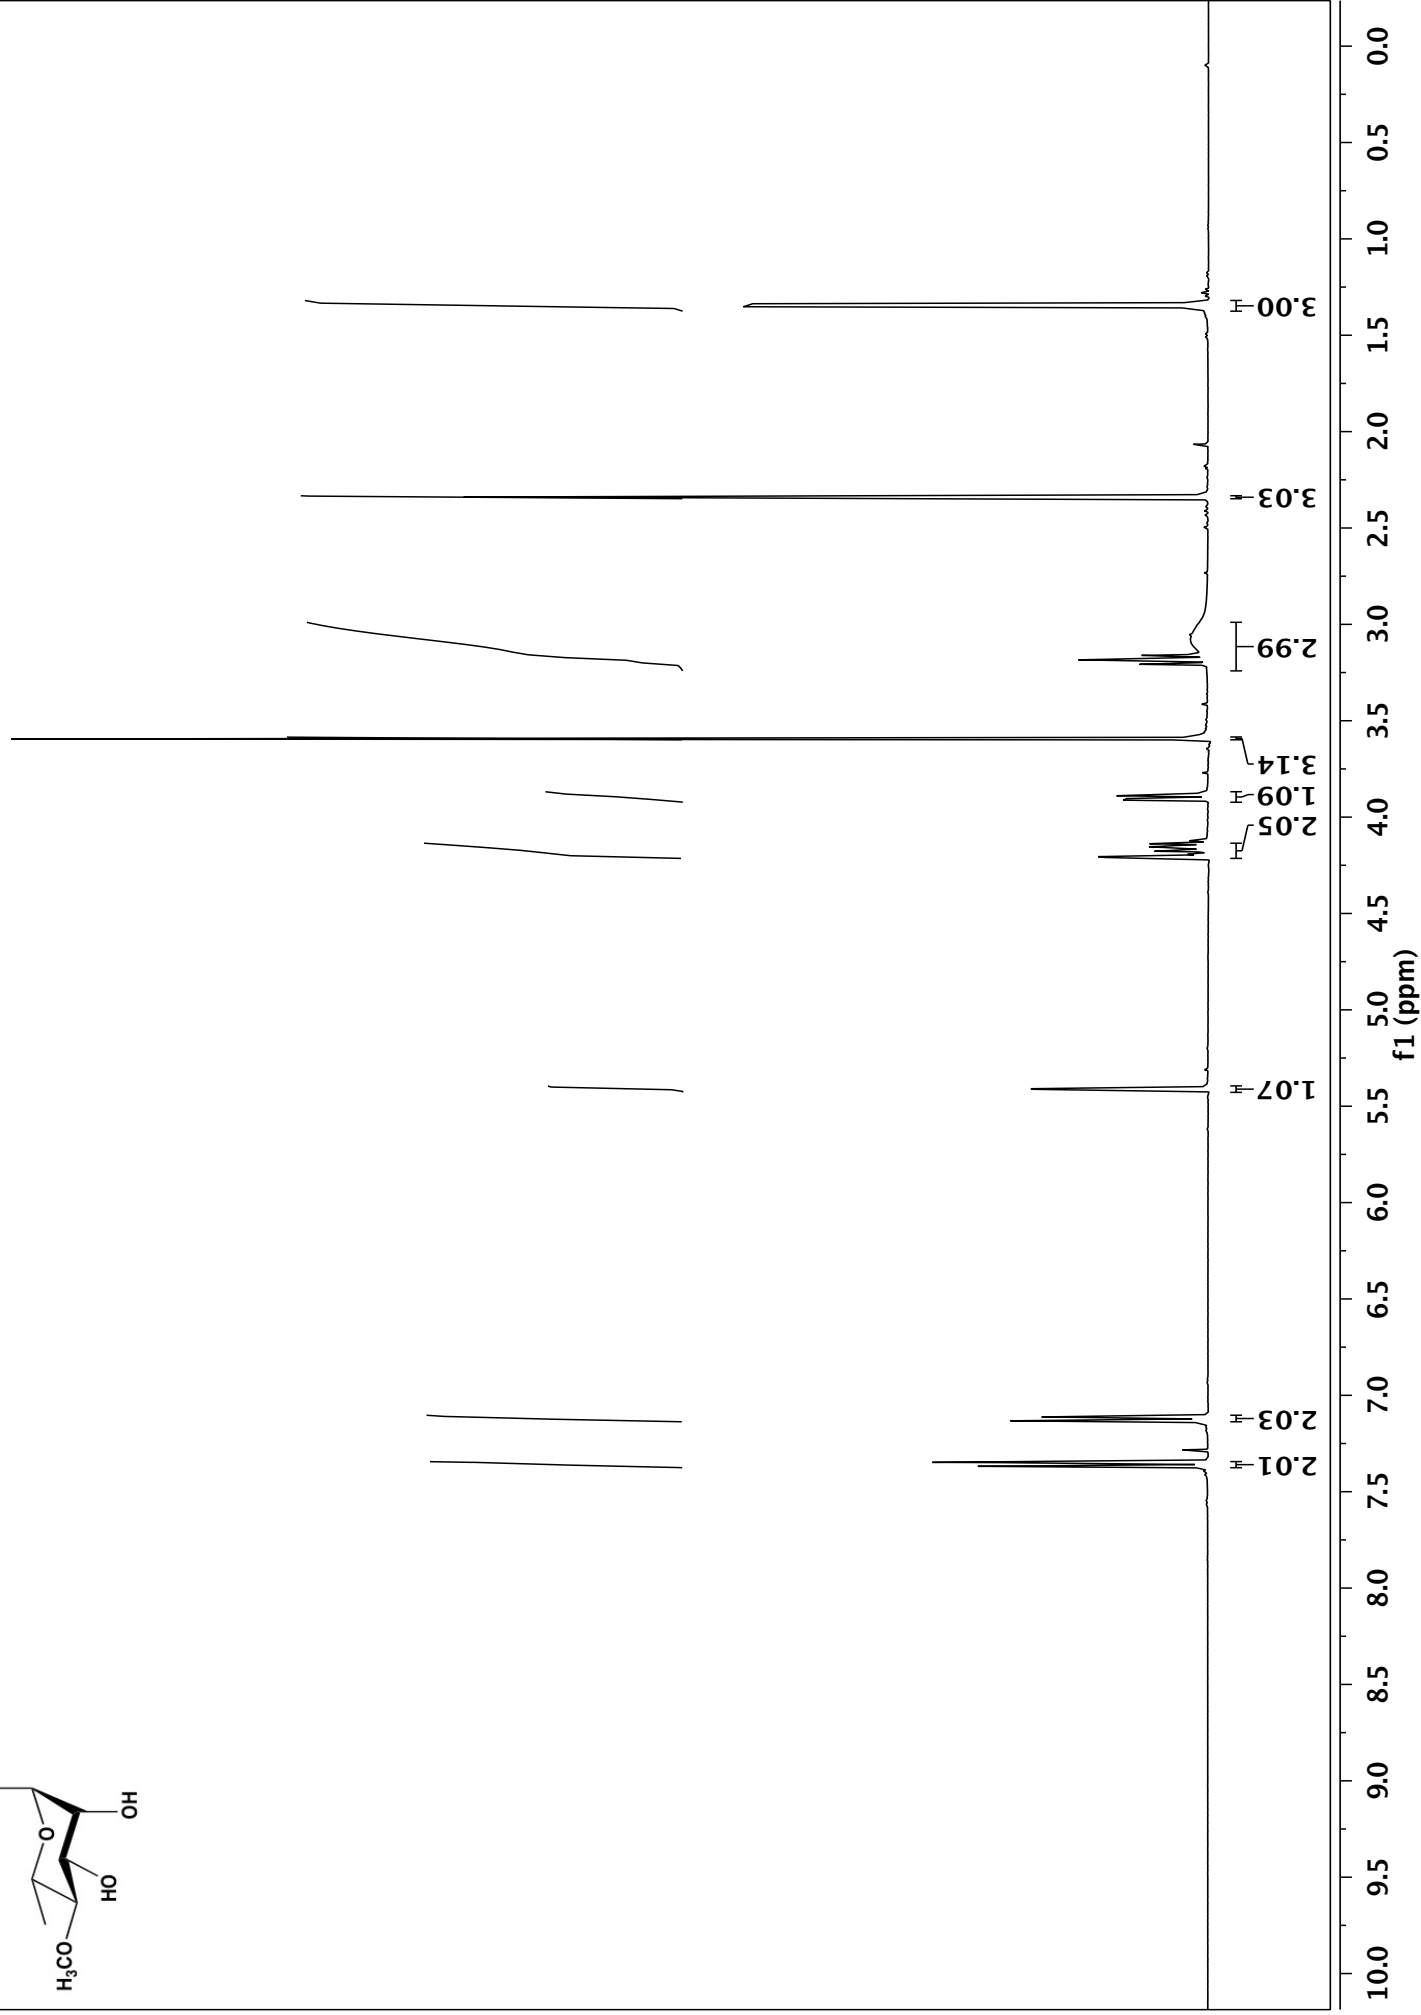

<sup>13</sup>C NMR of compound S46

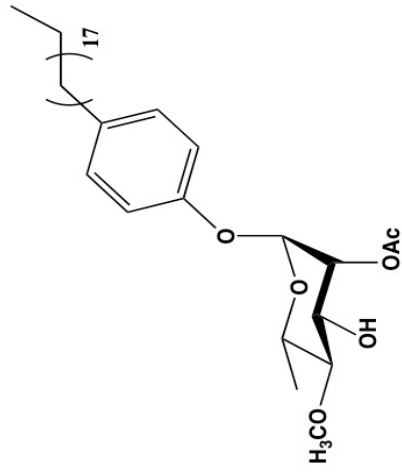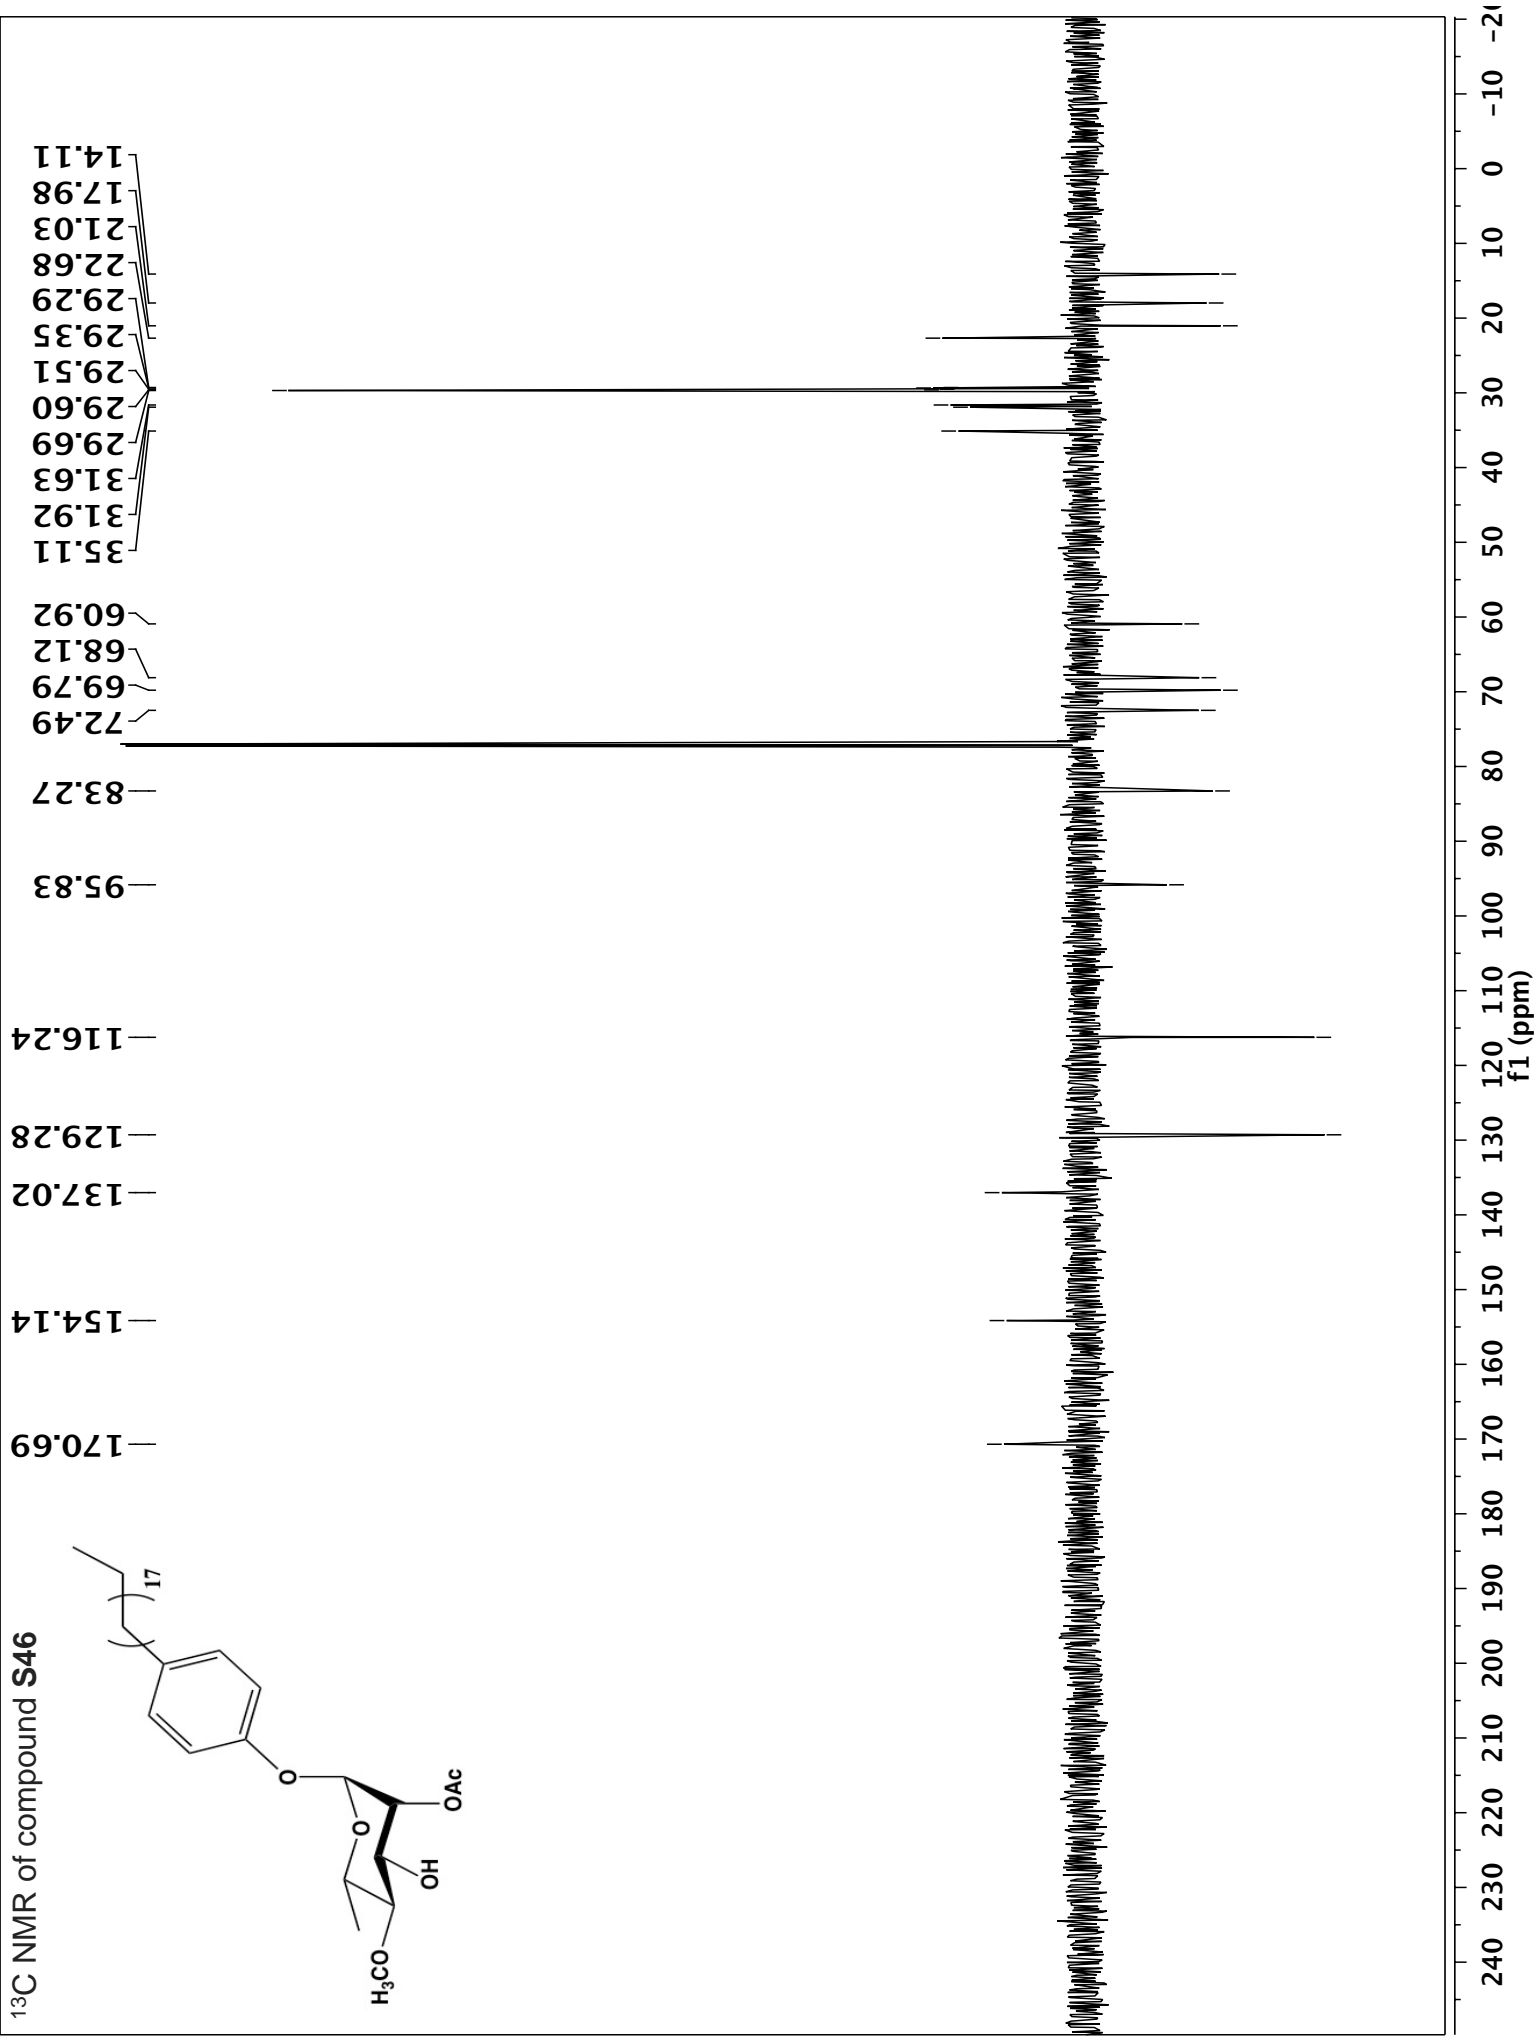

<sup>1</sup>H NMR of compound  
**S46**

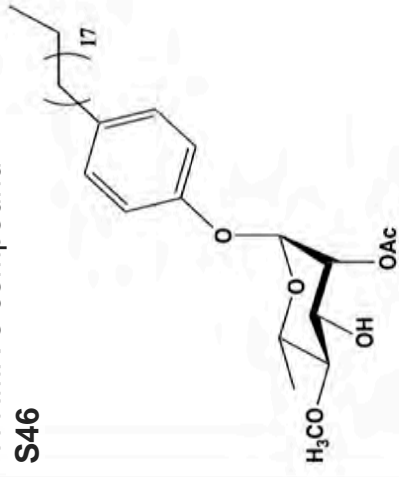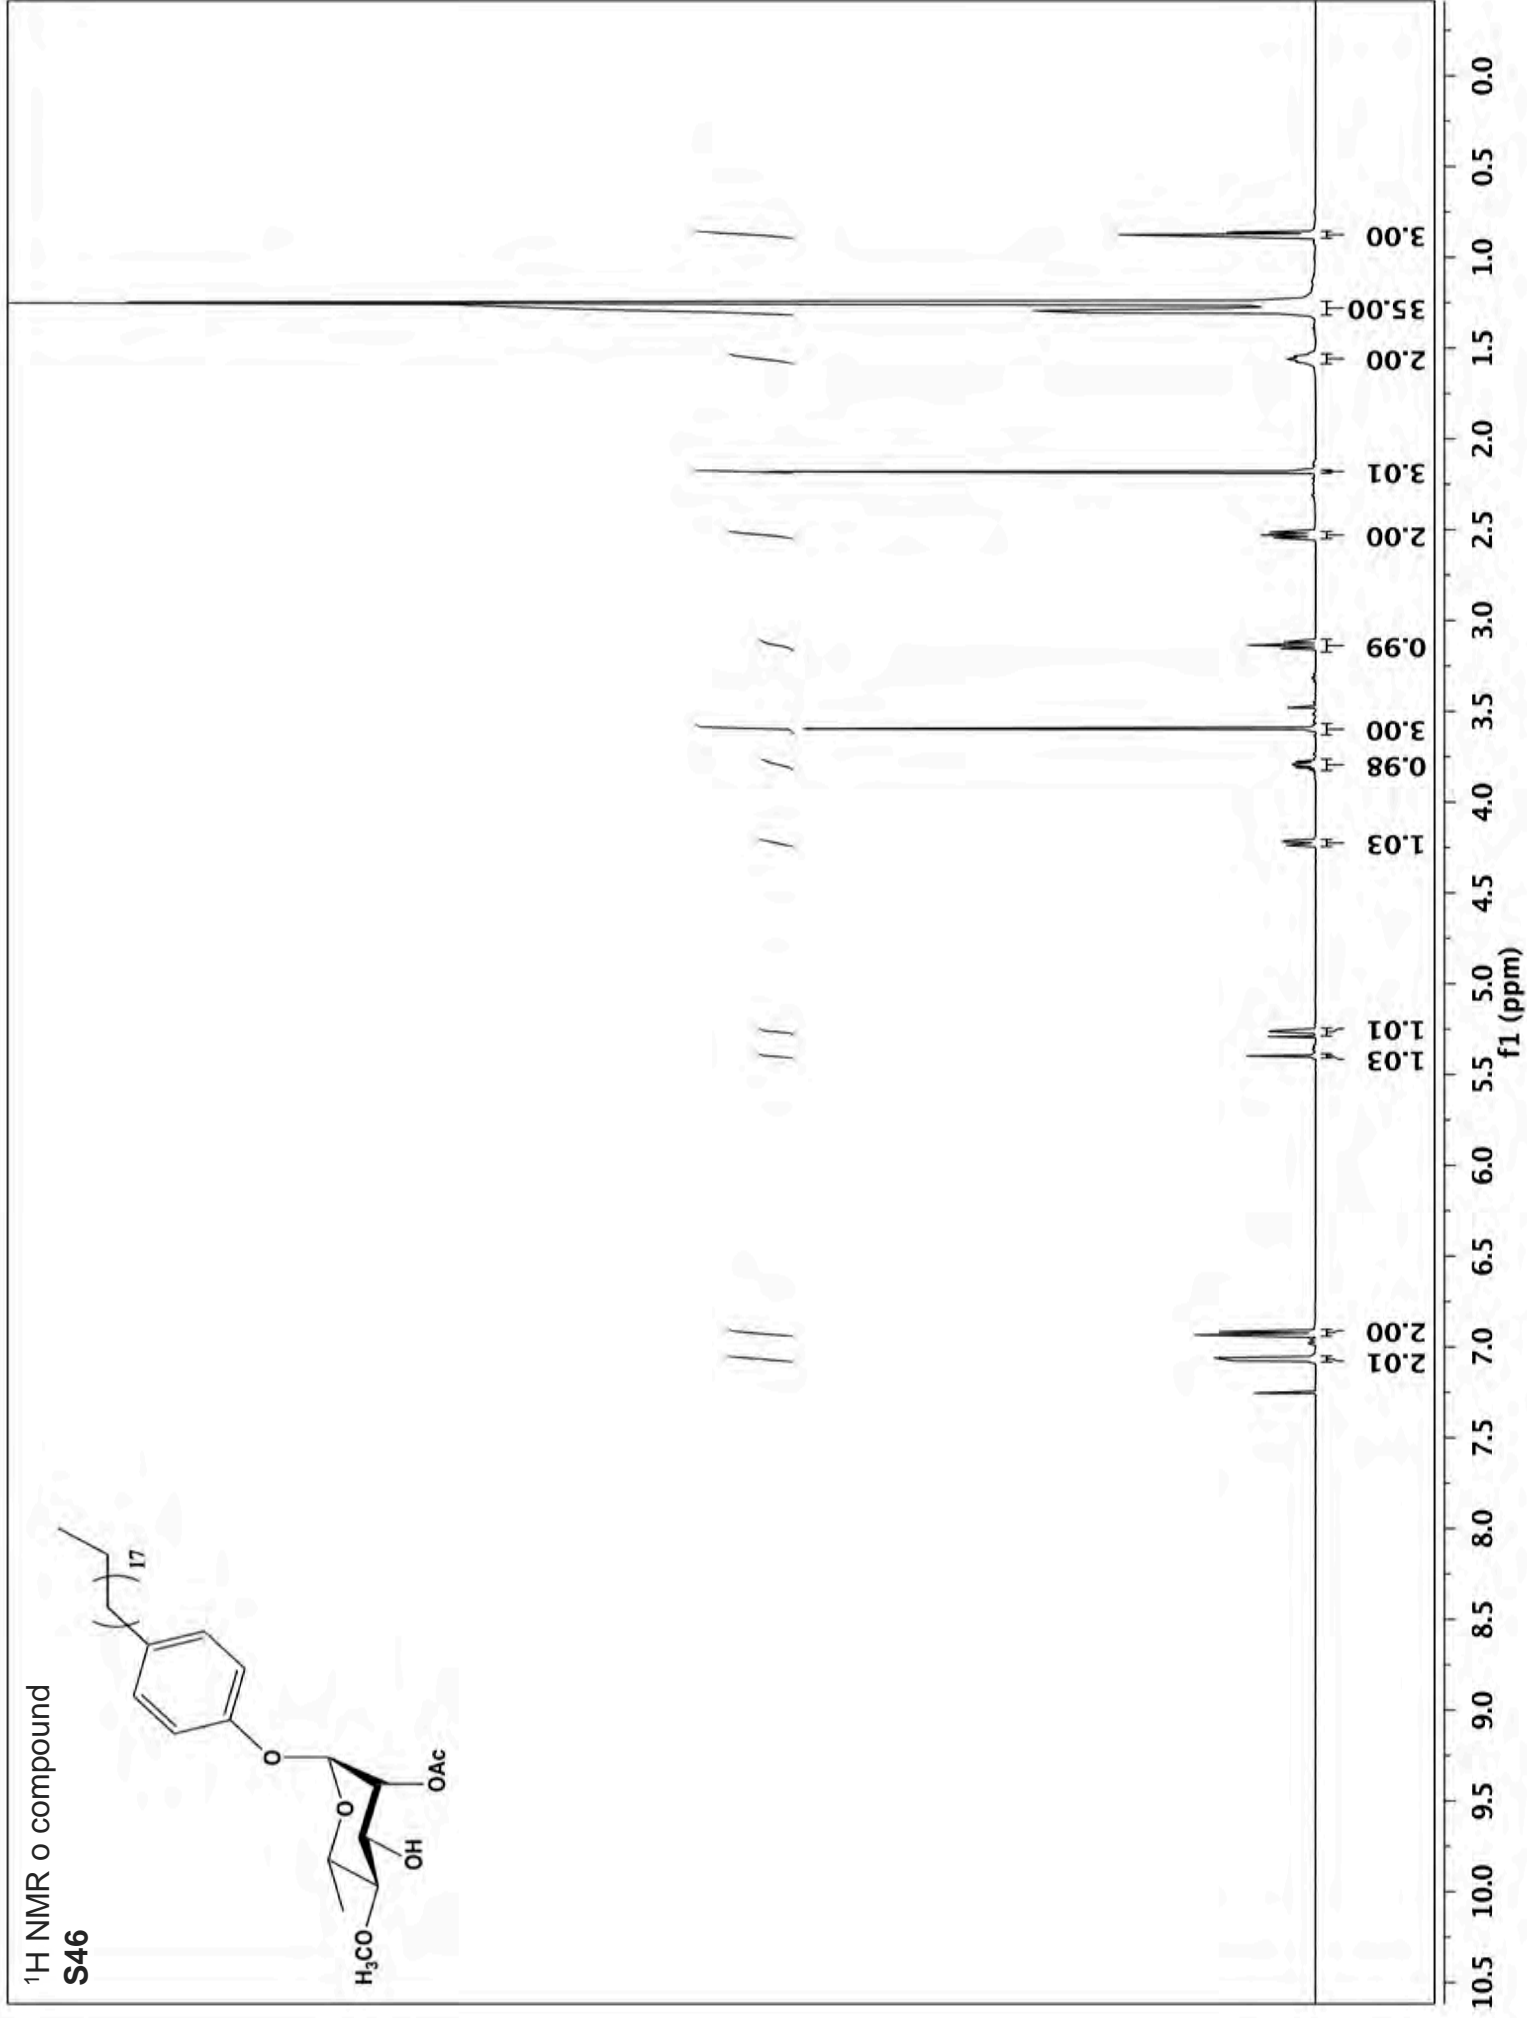

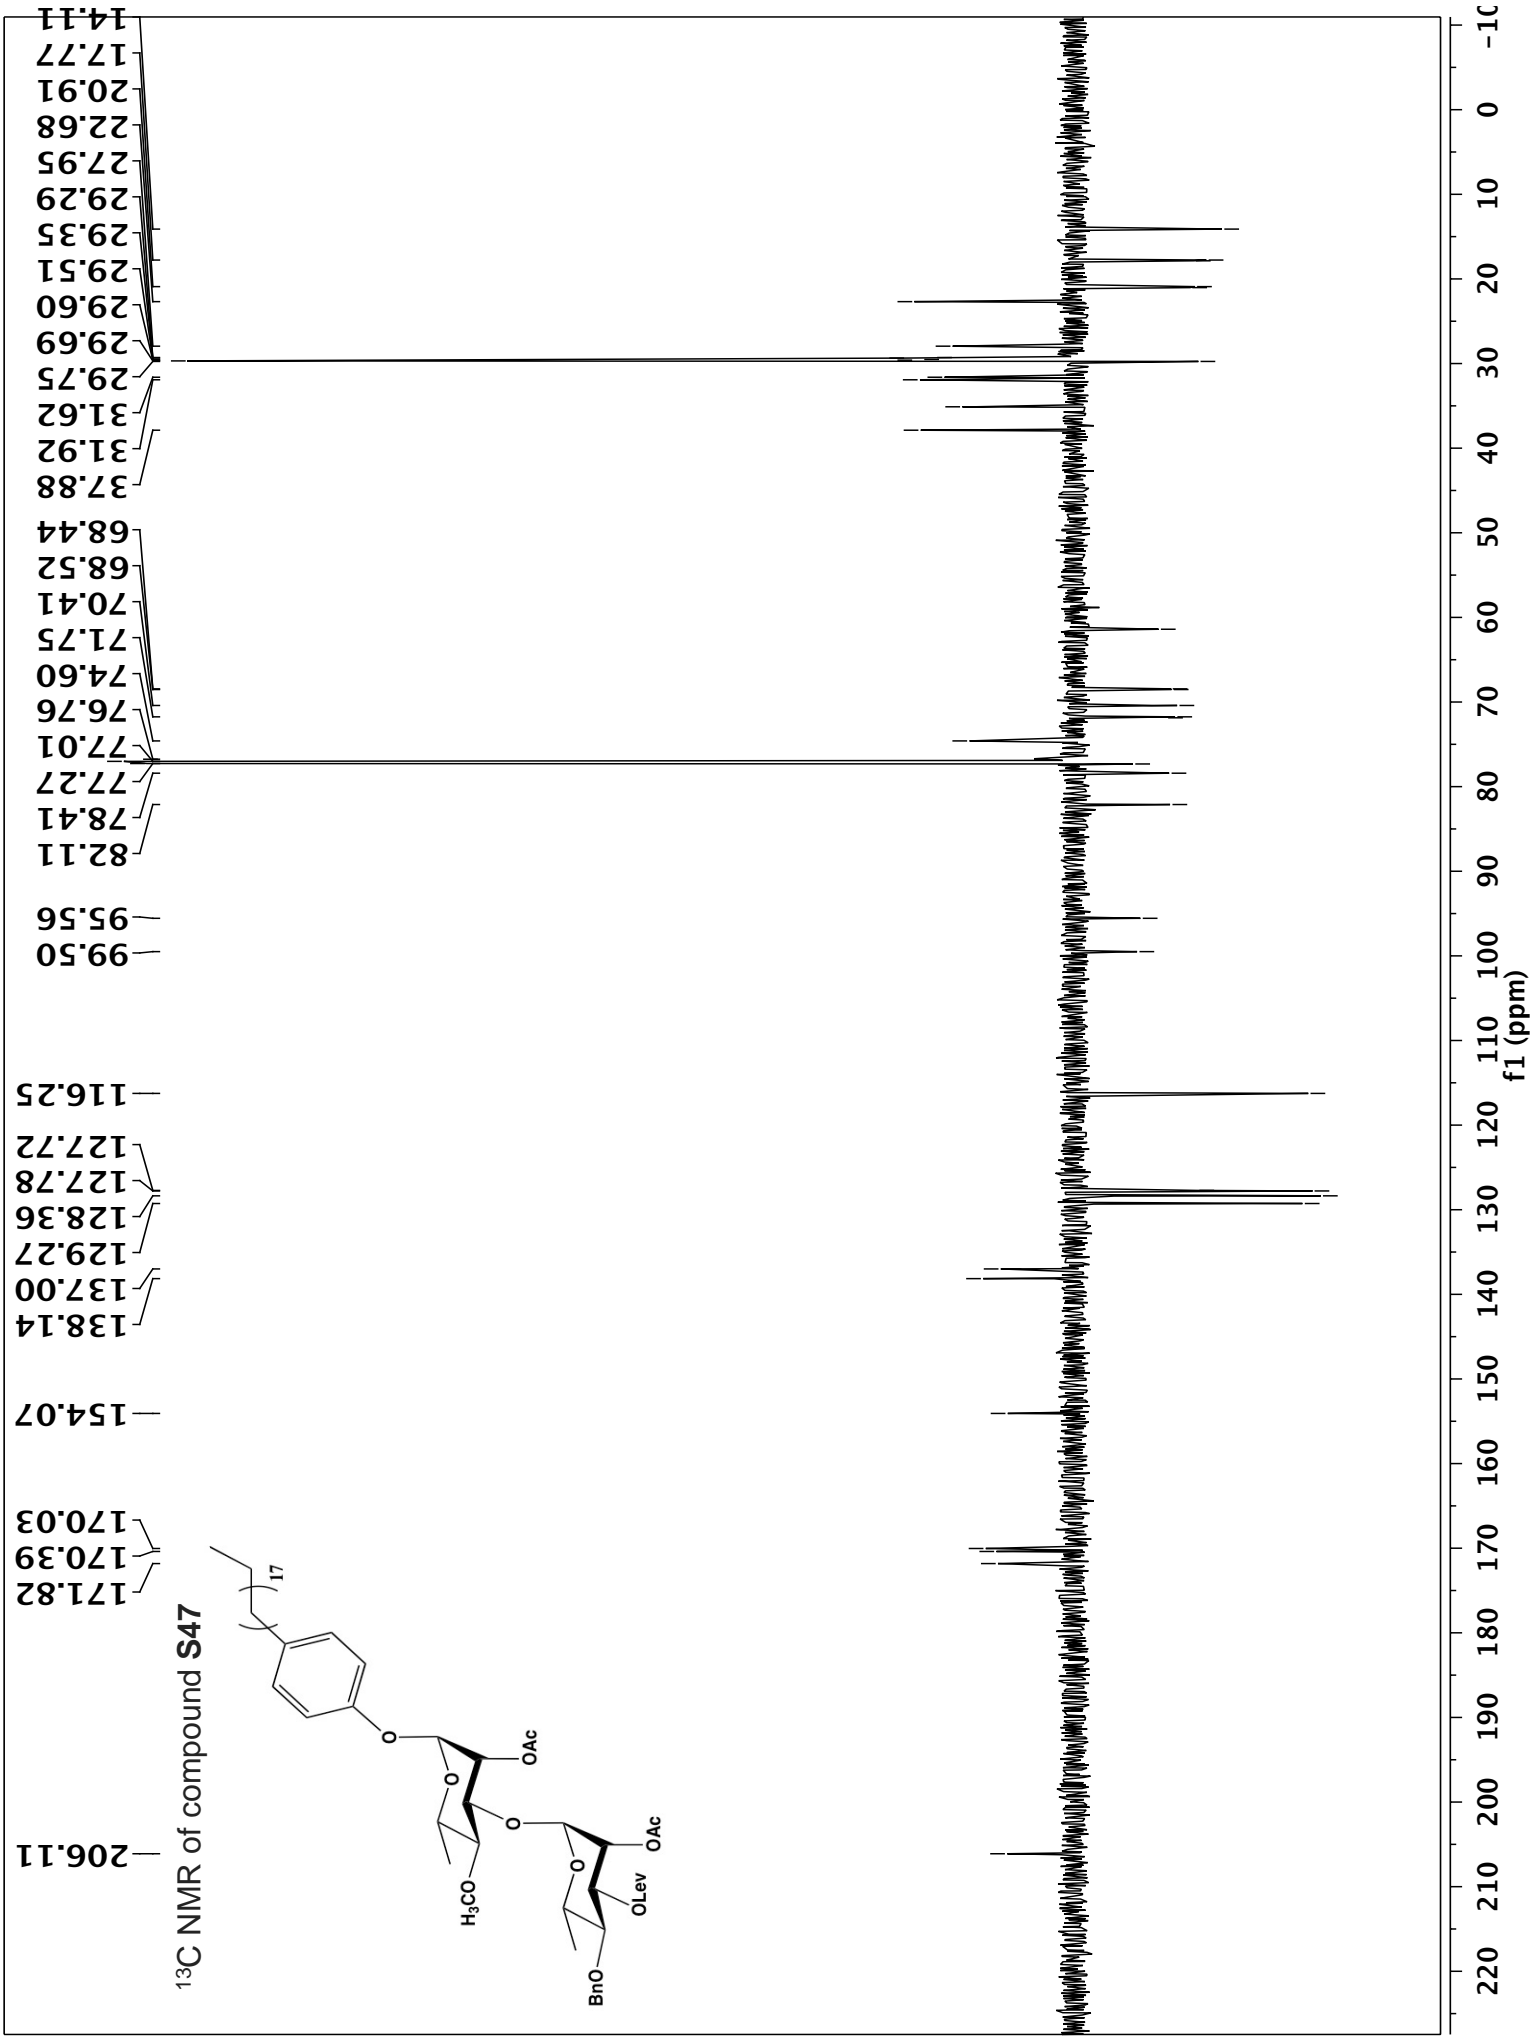



<sup>1</sup>H NMR of compound S47

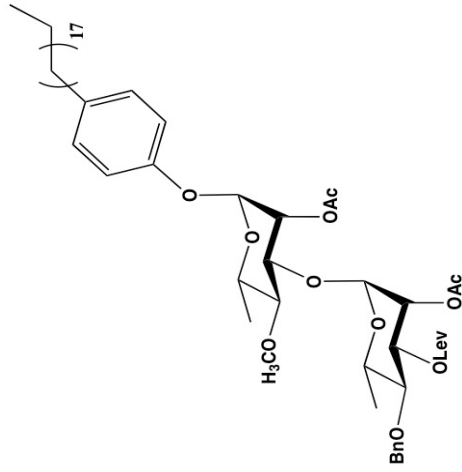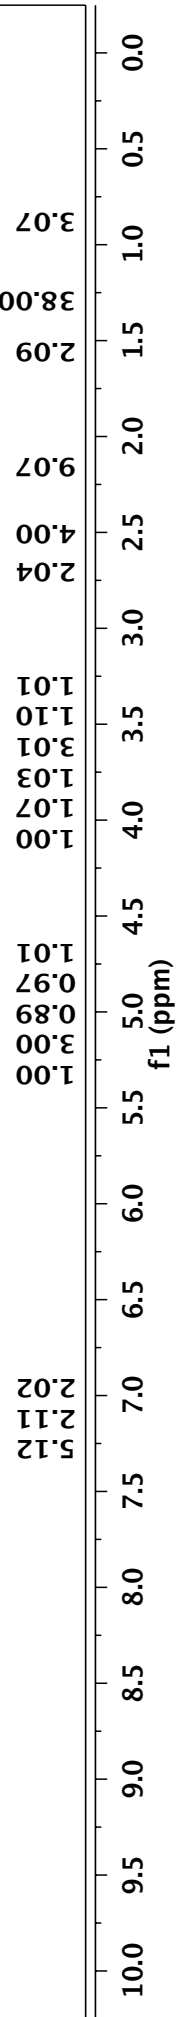



<sup>1</sup>H NMR of compound S48

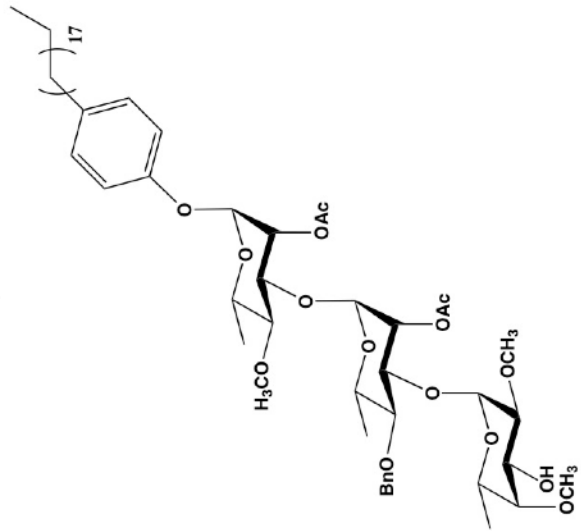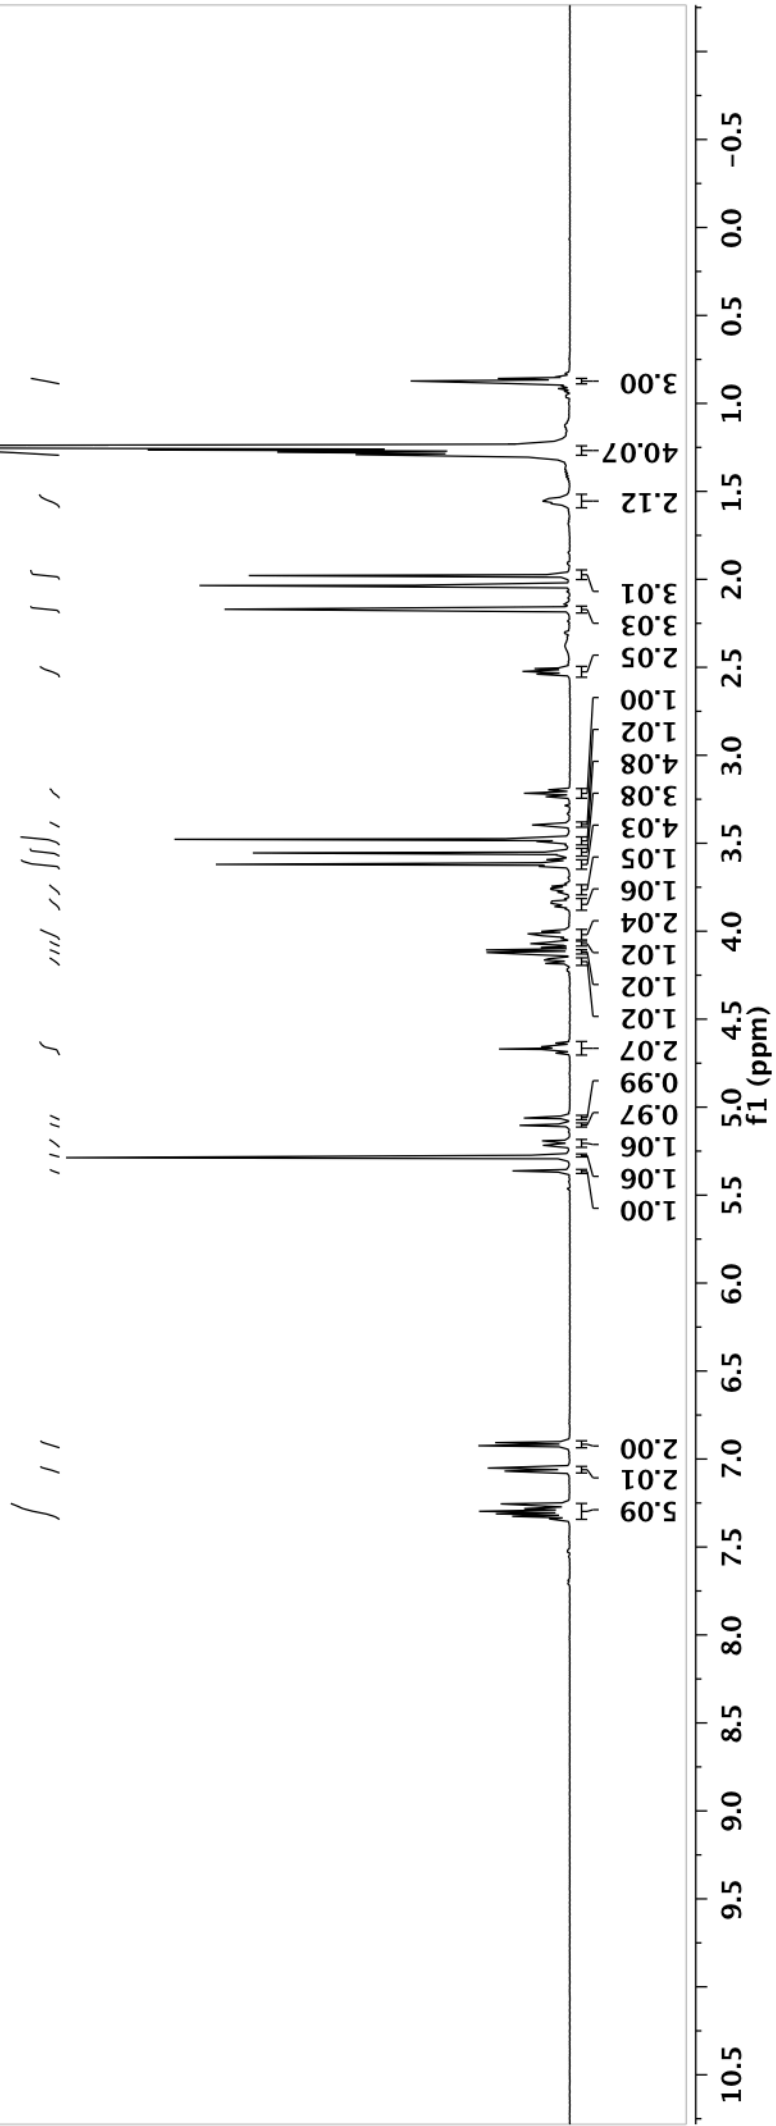

Supplement: SC-006-C4SC04004J-s001.pdf [file SC-006-C4SC04004J-s001.pdf]
